# Supplementary material for: Integrated Analyses of miRNAome and Transcriptome Reveal The Function of miRNAs in Morphogenesis of Organs and Defense of Endophytes in Pseudostellaria Heterophylla
Source: Research Square preprint supplement (doi:10.21203/rs.3.rs-239755/v1), 2021-03-01
Supplement: Supplementary file 1 [file 0d8d8757ffacdef73ab6b2a3.xlsx]

## Sheet: known_miR_norm
	Expression of known miRNAs after homogenization
miRNA_name	B_1	B_2	B_3	L_1	L_2	L_3	S_1	S_2	S_3	X_1	X_2	X_3	TPM of each miRNA
miR1426	0	0	0	0.53	1	0	0	0	0	0	0	0	1.53
miR1439	0	0	0	0	1	0	0	0	0	0	0	0	1
miR156a	517.83	347.23	282.13	889.33	941.31	731.89	208.57	272.46	276.66	453.13	609.73	514.98	6045.25
miR156a-3p	15.06	10	5.25	29.08	71.64	65.59	35.22	52.52	43.12	2.39	3.44	3.65	336.96
miR156a-5p	634.58	461.54	368.74	1291.17	1334.35	1038.96	265.8	360	367.2	540.4	750.11	625.46	8038.31
miR156b-3p	20.71	10	21	0	1.99	1.49	2.2	0	2.87	8.37	7.75	7.3	83.68
miR156c-3p	11.3	31.44	5.25	0	4.98	0	10.46	42.68	8.62	3.59	12.92	0.91	132.15
miR156e	13.18	35.72	32.81	11.1	17.91	32.79	92.45	142.25	139.41	13.15	26.7	45.65	603.12
miR156h	0	0	0	0	1	0	0	0	0	0	0	0	1
miR156i-3p	1.88	1.43	0	0	0	0	0	0	0.72	0	0	0	4.03
miR156j	0	1.43	0	0	0	0	0	0	0	0	0	0.91	2.34
miR156k	0	0	0	1.06	1	0	0	1.09	1.44	0	0	0	4.59
miR156l-5p	365.31	272.92	230.96	171.31	169.16	111.8	13.21	10.94	22.28	392.15	543.42	451.97	2755.43
miR159a	113001	91515.5	66627.1	639161	617570	400257	106150	143752	105801	56184	58603.1	50627.5	2.44925e+06
miR159b-5p	7.53	5.72	3.94	3.7	6.97	0	0.55	4.38	2.16	0	3.44	0	38.39
miR159c	523.48	410.1	337.25	1072.81	1099.52	1337.08	642.77	813.02	628.77	456.71	459.02	465.67	8246.2
miR159d	3.77	4.29	0	14.8	11.94	35.77	4.4	4.38	6.47	2.39	5.17	12.78	106.16
miR159e	0	0	0	0	0	0	0.55	0	0	0	0	0	0.55
miR160a-3p	3.77	1.43	1.31	0	0	0	0	0	0	0	0	0	6.51
miR160b-3p	26.36	5.72	11.81	12.16	33.83	4.47	7.15	9.85	8.62	1.2	1.72	1.83	124.72
miR160c-3p	26.36	12.86	23.62	1.06	6.97	2.98	3.3	3.28	2.16	0	0	9.13	91.72
miR160d	5.65	0	1.31	2.11	2.99	2.98	1.65	5.47	1.44	0	0	0	23.6
miR160d-5p	418.03	402.96	258.51	214.67	308.46	316.01	270.21	367.66	326.24	32.28	38.75	42	2995.78
miR160f-5p	0	7.14	2.62	1.06	0	0	0	0	0	0	0	0	10.82
miR160g	0	5.72	2.62	0.53	0	0	0	0	0	0	0	0	8.87
miR160h	0	7.14	2.62	1.06	0	0	0	0	0	0	0	0	10.82
miR164b	615.75	470.12	467.16	19.03	47.76	47.7	173.35	108.33	99.17	644.42	935.27	863.77	4491.83
miR164c	33.89	24.29	13.12	0	12.94	1.49	11.56	5.47	8.62	29.89	38.75	30.13	210.15
miR164e	1.88	4.29	0	0	1	0	1.1	1.09	0	1.2	2.58	1.83	14.97
miR164f	169.47	141.46	101.04	0	0	0	8.81	7.66	2.87	5.98	8.61	9.13	455.03
miR165a-3p	1.88	2.86	6.56	5.82	1.99	10.43	4.95	8.75	10.06	0	0	0	53.3
miR165a-5p	0	0	0	0.53	0	0	0	0	0	0	0	0	0.53
miR166a-3p	12618.2	10284	9866.85	10198.8	12089.7	11932.4	10086.8	7042.5	10377.9	157.82	231.66	163.44	95050
miR166b-5p	796.52	635.87	644.32	165.49	228.86	201.23	365.41	295.44	331.27	47.82	71.48	58.44	3842.15
miR166d	0	1.43	3.94	1.06	1	1.49	1.1	1.09	0.72	0	0	0	11.83
miR166e-3p	1.88	0	1.31	1.59	1	1.49	1.1	4.38	0	0	0	0	12.75
miR166e-5p	3.77	1.43	3.94	0	0	0	2.75	6.57	3.59	0	0	0	22.05
miR166g-5p	779.58	713.03	825.41	530.85	871.65	564.94	471.62	420.19	398.1	45.43	79.23	61.18	5761.21
miR166i-3p	54.61	61.44	13.12	4.23	7.96	8.94	104.56	91.92	86.95	0	0.86	0	434.59
miR166k	152.53	108.6	115.48	115.26	139.31	111.8	118.32	86.44	113.54	7.17	3.44	0	1071.89
miR166k-3p	7.53	11.43	3.94	6.34	8.96	4.47	1.65	2.19	2.16	0	2.58	0	51.25
miR166k-5p	0	0	0	0	0	0	0	1.09	0	0	0	0	1.09
miR166n	112.98	105.74	45.93	26.44	39.8	26.83	135.93	121.46	113.54	1.2	3.44	2.74	736.03
miR166p	1.88	0	0	0	0	0	0	1.09	0	0	0	0	2.97
miR167	0	0	0	0	0	1.49	0	0	0	0	0	0	1.49
miR167d	124.28	158.61	110.23	882.99	887.57	1080.7	276.26	198.06	229.23	55	77.51	53.87	4134.31
miR167g-3p	0	1.43	1.31	181.36	344.28	278.75	23.66	42.68	20.84	0	0	0	894.31
miR167h-5p	143.11	185.76	114.17	1144.71	1204	1344.53	361.01	260.43	301.81	60.97	78.37	53.87	5252.74
miR168a	380.37	352.94	286.07	770.9	839.81	767.67	299.92	269.18	322.65	405.3	416.82	362.49	5474.12
miR168a-3p	3.77	1.43	1.31	1.06	3.98	0	2.75	2.19	4.31	5.98	1.72	4.57	33.07
miR168b	0	0	0	0	2.99	0	0	0	0	0	0	0	2.99
miR168b-5p	414.27	378.67	301.82	813.2	880.61	795.99	315.88	296.54	343.49	422.04	446.96	401.75	5811.22
miR169a	15.06	21.43	11.81	0	1.99	0	3.3	0	2.87	68.15	33.59	69.39	227.59
miR169a-3p	796.52	665.88	459.29	1.59	2.99	1.49	9.91	9.85	22.99	1123.85	980.05	1160.52	5234.93
miR169aa	0	0	0	0	0	0	0	0	1.44	0	0	0	1.44
miR169ab	1.88	0	0	0	0	0	1.1	0	0	0	0	0	2.98
miR169b-3p	0	0	0	0	0	0	1.65	0	0	0	0	0	1.65
miR169d	0	0	0	0	2.99	0	1.65	0	2.16	0	0	0	6.8
miR169d-5p	3.77	0	2.62	0	1.99	0	4.95	0	6.47	7.17	2.58	0	29.55
miR169f	0	0	1.31	0	0	0	1.1	0	0	0	0	0	2.41
miR169i	1.88	0	0	0.53	1	0	0.55	0	0	1.2	0	0.91	6.07
miR169j	114.87	102.88	56.43	3.7	1.99	2.98	5.5	13.13	5.75	15.54	24.11	13.7	360.58
miR169w	3.77	1.43	3.94	0	1	0	1.65	0	0.72	0	0	0	12.51
miR169x	1.88	0	0	0	0	0	0	0	0	0	0	0	1.88
miR169y	99.8	97.17	45.93	2.11	0	2.98	2.75	5.47	2.87	11.96	20.67	9.13	300.84
miR170-3p	0	0	0	0	1	0	0	0	0	0	0	0	1
miR171a	0	5.72	2.62	0	0	0	0	0	0	1.2	0.86	0.91	11.31
miR171c-3p	237.26	285.78	209.96	286.05	305.48	409.92	187.11	226.51	200.49	5.98	12.92	8.22	2375.68
miR171c-5p	5.65	4.29	1.31	5.82	18.91	10.43	2.2	2.19	1.44	0	0	0	52.24
miR171d	103.57	100.02	35.43	1.06	3.98	1.49	25.86	30.64	39.52	51.41	39.62	53.87	486.47
miR171e-3p	237.26	287.21	211.27	364.83	370.15	542.58	237.74	263.71	252.94	5.98	12.92	8.22	2794.81
miR172a	0	0	2.62	1.06	1	0	2.2	0	0	0	1.72	1.83	10.43
miR172b	1120.4	985.96	931.7	8958.9	8201.1	7693.06	4186.82	3973.17	2553.16	1461	979.19	1004.39	42048.9
miR172c	3796.2	3202.22	2662.57	2930.25	2860.73	2104.75	3514.33	3260.82	2293.75	7703.13	6518.44	6670.05	47517.2
miR172d-5p	1.88	0	1.31	0	0	0	0.55	1.09	0	0	0.86	0.91	6.6
miR172e-5p	5.65	0	1.31	42.83	69.65	8.94	62.19	61.28	67.55	4.78	3.44	2.74	330.36
miR172h-5p	5.65	0	1.31	43.89	69.65	8.94	62.74	61.28	68.98	4.78	3.44	2.74	333.4
miR1862b	0	0	0	0	0	0	0	1.09	0	0	0	0	1.09
miR1863a	120.51	87.16	135.16	17.45	35.82	38.76	60.53	59.09	81.2	125.54	121.43	209.1	1091.75
miR1863b	109.22	77.16	108.92	15.33	27.86	32.79	53.38	51.43	63.24	133.91	130.04	193.57	996.85
miR1866-5p	0	0	0	0	0	0	0	0	1.44	0	0	0	1.44
miR1871	0	0	0	0	0	1.49	0.55	0	0	1.2	0.86	0	4.1
miR1873	1.88	0	0	0	0	0	0	0	0.72	0	0	0	2.6
miR2098-3p	0	0	0	0	0	1.49	0	0	0	0	0	0	1.49
miR2111f	5.65	17.15	3.94	28.55	43.78	59.62	4.95	4.38	10.06	1.2	6.03	1.83	187.14
miR2873a	0	0	0	0	0	0	0	0	0	2.39	0	0	2.39
miR319a	186825	190603	158469	1627.98	1707.48	1512.97	99750.6	84704.8	82538.9	391264	428148	377816	2.00497e+06
miR319a-3p.2-3p	276.81	198.62	262.45	1.59	1.99	0	117.77	102.86	109.94	587.03	496.91	470.24	2626.21
miR319b-5p	502.77	307.22	387.12	0	0	1.49	158.49	226.51	197.61	595.4	633.84	661.98	3672.43
miR319d-5p	502.77	307.22	387.12	0	1	1.49	159.04	229.79	199.05	598.99	634.71	661.98	3683.16
miR319i	26.36	30.01	27.56	1.59	1	0	18.71	17.51	12.93	50.21	49.95	52.96	288.79
miR3627b	1.88	0	0	0	0	0	0	0	0	0	0	0	1.88
miR390-3p	3.77	2.86	0	0	0	0	0.55	0	0	0	0	0	7.18
miR390b	5956.03	6017.2	2686.19	19.56	14.93	10.43	488.68	450.83	424.69	1692.94	4398.16	672.94	22832.6
miR390b-3p	5.65	2.86	0	0.53	0	0	12.11	3.28	5.75	0	0	0	30.18
miR390d-3p	5.65	8.57	3.94	0	0	0	1.1	0	0	0	0.86	2.74	22.86
miR391-5p	1.88	0	0	0	0	0	0	0	0	0	0	0	1.88
miR393a-5p	329.53	268.64	286.07	173.95	315.43	465.07	775.4	674.05	878.12	46.63	43.06	33.78	4289.73
miR394a-5p	546.08	497.27	367.43	26.97	42.79	67.08	551.42	579.94	667.57	5353.81	6340.17	7505.51	22546
miR394b-3p	0	0	0	0	0	0	0	0	0	1.2	0	0	1.2
miR395	0	0	1.31	1.06	1	0	0	0	0	0	0	0	3.37
miR395a	5.65	0	0	3.17	0	4.47	0.55	0	0	0	2.58	0	16.42
miR395b	0	0	0	0	0	0	1.1	0	0	0	0	0	1.1
miR395c	77.2	48.58	55.11	204.62	124.38	129.68	17.61	22.98	6.47	17.93	28.42	42	774.98
miR395h	28.25	7.14	9.19	11.63	8.96	16.4	4.4	5.47	3.59	8.37	8.61	7.3	119.31
miR395k	267.39	185.76	170.59	455.77	313.44	268.31	85.3	98.48	53.89	145.86	249.75	182.62	2477.16
miR395o	0	0	0	0	0	0	1.1	0	0	0	0	0	1.1
miR395t	3.77	0	0	0.53	0	0	0	0	0	0	0.86	0	5.16
miR395u	5.65	0	1.31	0	0	0	0	0	0	0	5.17	0	12.13
miR396a-3p	805.94	573	549.83	1012	1324.4	867.54	315.33	518.67	353.55	396.93	430.6	262.97	7410.76
miR396a-5p	665304	688444	749752	327276	344962	562692	768772	742220	786530	528454	486757	544313	7.19548e+06
miR396b-3p	0	0	0	6.87	3.98	4.47	0	0	0	0	0	0	15.32
miR396c-3p	3.77	1.43	0	2.64	0	4.47	0.55	2.19	0.72	2.39	0	0	18.16
miR396f-5p	0	0	0	0	0	0	0	0	0	1.2	0	0	1.2
miR396g-5p	3.77	5.72	1.31	0	1.99	1.49	3.3	4.38	7.19	0	3.44	0.91	33.5
miR397b	1.88	1.43	1.31	216.78	92.54	150.55	70.44	59.09	12.22	0	0	1.83	608.07
miR398a-3p	0	0	2.62	19.03	20.9	25.34	21.46	27.36	1.44	0	0	0	118.15
miR398b	0	0	0	1.06	0	0	0	0	0	0	0	0	1.06
miR399a	50.84	52.87	32.81	103.1	114.43	22.36	36.87	62.37	6.47	8.37	12.92	2.74	506.15
miR399b	15.06	41.44	3.94	14.8	35.82	0	0.55	13.13	0.72	0	11.2	0.91	137.57
miR399e	82.85	117.17	27.56	49.7	60.7	7.45	11.56	53.62	2.16	19.13	60.28	12.78	504.96
miR399h	45.19	37.15	23.62	84.07	88.56	20.87	30.82	54.71	7.19	4.78	7.75	3.65	408.36
miR399j	5.65	1.43	1.31	1.06	0	0	0	0	0	1.2	0.86	0	11.51
miR399k	13.18	21.43	1.31	6.34	16.92	0	0	3.28	0	0	3.44	0	65.9
miR399n	101.68	127.17	31.49	40.18	79.6	2.98	20.36	42.68	7.19	34.67	75.79	16.44	580.23
miR399p	161.94	150.04	51.18	118.97	166.17	19.38	47.88	93.01	14.37	38.26	86.98	16.44	964.62
miR403b	508.42	514.41	545.9	399.2	322.39	623.08	189.86	203.53	199.05	261.83	271.28	356.1	4395.05
miR408a	0	0	0	0	0	0	0.55	0	0	0	0	0	0.55
miR414	0	0	0	0	0	0	0	0	0	1.2	0	0	1.2
miR477d-5p	0	0	0	0	1	0	0	0	0	0	0	0	1
miR5072	205.25	120.03	143.04	127.43	252.74	336.88	91.35	431.13	167.43	173.36	200.66	413.62	2662.92
miR5077	18.83	15.72	19.68	23.26	43.78	32.79	11.56	73.31	15.09	38.26	46.5	36.52	375.3
miR5083	0	0	0	0	0	0	0	1.09	0	0	0	0	1.09
miR5161	1.88	0	0	0	0	0	1.1	0	0	0	0	0	2.98
miR5162	0	0	0	0	0	0	0	1.09	0	0	0	0	1.09
miR5205b	0	0	0	0	0	1.49	0	0	0	0	0	0	1.49
miR5225a	0	0	1.31	0.53	0	0	1.1	0	0	0	0	0	2.94
miR5225b	0	0	1.31	0.53	0	0	1.1	0	0	0	0	0	2.94
miR5272c	0	0	0	0	0	0	0	1.09	0	0	0	0	1.09
miR5281e	0	0	0	0.53	0	1.49	0	0	0	0	0	0	2.02
miR5288	0	0	0	0	0	0	0	0	0.72	0	0	0	0.72
miR5298d	0	0	0	0	0	2.98	0	0	0	0	0	0	2.98
miR535c	0	0	0	0.53	0	1.49	0	1.09	0.72	0	0	0	3.83
miR5523	5.65	0	0	0.53	0	0	1.1	0	0	1.2	0	10.04	18.52
miR5532	0	0	0	0	0	0	0	0	0	0	2.58	0	2.58
miR5658	0	0	0	0	2.99	0	0	0	0	0	0	0	2.99
miR5817	0	0	0	0	0	0	0	0	0	0	0.86	0	0.86
miR5831	0	0	0	0	0	0	0.55	0	0	0	0	0	0.55
miR6462e	0	0	0	0	1	0	0	0	0	0	0	0	1
miR6470	94.15	67.16	43.3	13.22	24.88	8.94	44.03	41.58	16.53	121.95	117.98	72.13	665.85
miR6478	1.88	4.29	5.25	6.87	11.94	7.45	4.4	6.57	2.16	2.39	5.17	4.57	62.94
miR7696a-3p	0	0	1.31	0	0	0	0	0	0	0	0	0	1.31
miR7696c-3p	0	0	1.31	0	0	0	0	0	0	0	0	0	1.31
miR7828	1.88	0	0	0	0	0	0	1.09	0	0	0	0	2.97
miR812v	0	0	0	0	0	0	0	0	0	0	0.86	0	0.86
miR8175	525.37	338.66	454.04	344.74	605.98	933.13	392.93	1943.36	736.56	784.3	676.9	1423.49	9159.46
miR827	1.88	0	0	0	0	0	0	0	0	0	0	0	1.88
miR828b-5p	0	0	0	0	0	0	4.95	0	1.44	0	0	0	6.39
miR829-3p.1	3.77	0	0	0	0	0	0	0	0	0	3.44	0	7.21
miR835-5p	0	0	0	0	0	0	1.1	0	0	0	0	0	1.1
miR845a	0	0	0	0	0	0	0	0	0	0	0.86	0.91	1.77
miR846-3p	0	0	1.31	0	0	0	0	0	0	0	0	0	1.31
miR894	2459.24	1414.64	2057.62	1785.54	2955.26	4515.07	1216.75	6557.75	3030.3	3284.26	2454.43	5052.07	36782.9

## Sheet: Sheet1
miR396a-3p	7.20296e+06
miR159a	2.45764e+06
miR319a	2.01524e+06
miR166a-3p	106998
miR172a	90246.9
miR894	36782.9
miR390-3p	22892.8
miR394a-5p	22546
miR156a	18006.9
miR168a	11321.4
miR167	10282.9
miR8175	9159.46
miR169a	6189.23
miR171a	5720.51
miR164b	5171.98
miR403b	4395.05
miR395	3410.73
miR160a-3p	3272.84
miR399a	3179.3
miR5072	2662.92
miR1863a	2088.6
miR397b	1214.26
miR6470	665.85
miR5077	375.3
miR2111f	368.63
miR398a-3p	119.21
miR6478	62.94
miR165a-3p	53.83
miR5523	18.52
miR1871	8.2
miR829-3p.1	7.21
miR828b-5p	6.39
miR2873a	4.78
miR535c	3.83
miR1873	3.32
miR1426	3.06
miR5658	2.99
miR2098-3p	2.98
miR5161	2.98
miR5298d	2.98
miR7828	2.97
miR5225a	2.94
miR5225b	2.94
miR1866-5p	2.88
miR7696a-3p	2.62
miR5532	2.58
miR5281e	2.02
miR1439	2
miR3627b	1.88
miR827	1.88
miR845a	1.77
miR5205b	1.49
miR846-3p	1.31
miR414	1.2
miR835-5p	1.1
miR5083	1.09
miR5162	1.09
miR5272c	1.09
miR170-3p	1
miR477d-5p	1
miR6462e	1
miR5817	0.86
miR812v	0.86
miR5288	0.72
miR408a	0.55
miR5831	0.55
miRNA_name
