# Supplementary material for: Integrated Analyses of miRNAome and Transcriptome Reveal The Function of miRNAs in Morphogenesis of Organs and Defense of Endophytes in Pseudostellaria Heterophylla
Source: Research Square preprint supplement (doi:10.21203/rs.3.rs-239755/v1), 2021-03-01
Supplement: Supplementary file 4 [file 38aa043cf21d110cb04a3e0f.xlsx]

## Sheet: Sheet1
miRNAs	target gene	score	query_start	query_end	target_start	target_end	query_seq	align	target_seq	nr
miR160h	TRINITY_DN85912_c4_g5	2	1	21	2049	2068	TGCCTGGCTCCCTGCATGCCA	||||:|||||||||||:*|*|	ACGGGCCGAGGGACGTG-GCT	gi|731335913|ref|XP_010678976.1|( PREDICTED: serine carboxypeptidase-like 20 [Beta vulgaris subsp. vulgaris])
miR169w	TRINITY_DN93270_c2_g2	0.8	1	21	4408	4428	TAGCCAAGGATGACTTGCCCA	:||||||||||||||||||*|	GTCGGTTCCTACTGAACGGCT	gi|731317972|ref|XP_010669470.1|( PREDICTED: uncharacterized protein LOC104886694 [Beta vulgaris subsp. vulgaris])
	TRINITY_DN85133_c0_g1	1.5	1	21	1870	1889	TAGCCAAGGATGACTTGCCCA	*|||||||||||||||*||||	CTCGGTTCCTACTGAA-GGGT	gi|731348126|ref|XP_010685336.1|( PREDICTED: nuclear transcription factor Y subunit A-3 [Beta vulgaris subsp. vulgaris])
	TRINITY_DN107545_c0_g1	2	1	21	185	204	TAGCCAAGGATGACTTGCCCA	*||||||||||||*|||*|||	TTCGGTTCCTACTAAAC-GGT	gi|108706462|gb|ABF94257.1|( CCAAT-binding transcription factor subunit B family protein, expressed [Oryza sativa Japonica Group])
	TRINITY_DN88802_c2_g3	2	1	21	2771	2791	TAGCCAAGGATGACTTGCCCA	*||||||||||||*|||||*|	TTCGGTTCCTACTCAACGGTT	gi|902218597|gb|KNA18080.1|( hypothetical protein SOVF_074230 [Spinacia oleracea])
miR171a	TRINITY_DN92867_c1_g1	1.5	1	21	638	658	TGAGCCGCGCCAATATCACAT	|||||||*|||||||||||*|	ACTCGGCACGGTTATAGTGAA	gi|902231904|gb|KNA22440.1|( hypothetical protein SOVF_034090 isoform B [Spinacia oleracea])
miR390-3p	TRINITY_DN84925_c0_g2	2	1	20	1092	1110	CGCTATCTATCCTGAGCTCC	||||*||||:|||||||*||	GCGACAGATGGGACTCG-GG	gi|926781046|ref|XP_013898997.1|( thiamine biosynthetic enzyme [Monoraphidium neglectum])
