# Supplementary material for: Integrated Analyses of miRNAome and Transcriptome Reveal The Function of miRNAs in Morphogenesis of Organs and Defense of Endophytes in Pseudostellaria Heterophylla
Source: Research Square preprint supplement (doi:10.21203/rs.3.rs-239755/v1), 2021-03-01
Supplement: Supplementary file 6 [file 47cc6a5495b47a4965288280.xlsx]

## Sheet: Upregulated in ground parts
query	target	score	query_start	query_end	target_start	target_end	query_seq	align	target_seq	nr
miR167g-3p	TRINITY_DN92844_c0_g1	2	1	21	3644	3664	AGATCATGTGGCAGTTTCACC	*||||||||||||*|||||*|	ACTAGTACACCGTGAAAGTAG	gi|731319809|ref|XP_010670471.1|( PREDICTED: F-box protein At3g54460 [Beta vulgaris subsp. vulgaris])	PREDICTED: F-box protein At3g54460 [Beta vulgaris subsp. vulgaris]
miR172e-5p	TRINITY_DN67913_c0_g1	1.5	1	20	118	137	GCAGCACCATTAAGATTCAC	|||:||||*|||||||||||	CGTTGTGGGAATTCTAAGTG	gi|902223593|gb|KNA19500.1|( hypothetical protein SOVF_060410 [Spinacia oleracea])	desiccation protectant protein Lea14 homolog [Chenopodium quinoa]
	TRINITY_DN88128_c1_g2	2	1	20	3409	3428	GCAGCACCATTAAGATTCAC	|||*|||||||||||||*|*	CGTGGTGGTAATTCTAATTC	gi|731353764|ref|XP_010688227.1|( PREDICTED: pentatricopeptide repeat-containing protein At5g18950 [Beta vulgaris subsp. vulgaris])	hypothetical protein BVRB_8g196660 [Beta vulgaris subsp. vulgaris]
	TRINITY_DN93068_c0_g1	2	1	20	1206	1225	GCAGCACCATTAAGATTCAC	|||||||*|||||:|||||*	CGTCGTGATAATTTTAAGTT	gi|590643376|ref|XP_007030786.1|( Phosphoglycerate mutase family protein isoform 1 [Theobroma cacao])	PREDICTED: phosphoglycerate mutase-like protein AT74 [Theobroma cacao]
miR397b	TRINITY_DN84866_c0_g1	1.5	1	21	707	727	CCATTGAGTGCAGCGTTGATG	**|||||||||||||||||||	ACTAACTCACGTCGCAACTAC	gi|731349224|ref|XP_010685887.1|( PREDICTED: laccase-3-like [Beta vulgaris subsp. vulgaris])	PREDICTED: laccase-3 [Beta vulgaris subsp. vulgaris]
miR398a-3p	TRINITY_DN88258_c4_g4	1.5	1	21	245	265	TGTGTTCTCAGGTCACCCCTT	|||||||||||:*||||||||	ACACAAGAGTCTCGTGGGGAA	gi|731328262|ref|XP_010674951.1|( PREDICTED: superoxide dismutase [Cu-Zn] [Beta vulgaris subsp. vulgaris])	PREDICTED: superoxide dismutase [Cu-Zn] [Beta vulgaris subsp. vulgaris]
	TRINITY_DN87171_c1_g2	0.5	1	21	3321	3341	TGTGTTCTCAGGTCACCCCTT	||||||||||||||||||||*	ACACAAGAGTCCAGTGGGGAC	gi|731325956|ref|XP_010673778.1|( PREDICTED: uncharacterized protein LOC104890105 isoform X2 [Beta vulgaris subsp. vulgaris])	uncharacterized protein LOC110736312 isoform X3 [Chenopodium quinoa]
	TRINITY_DN87171_c1_g2	0.5	1	21	3151	3171	TGTGTTCTCAGGTCACCCCTT	||||||||||||||||||||*	ACACAAGAGTCCAGTGGGGAC	gi|731325956|ref|XP_010673778.1|( PREDICTED: uncharacterized protein LOC104890105 isoform X2 [Beta vulgaris subsp. vulgaris])	uncharacterized protein LOC110736312 isoform X3 [Chenopodium quinoa]
Phn-m0028-3p	TRINITY_DN93113_c4_g1	0	1	24	897	920	AGTTAGTGGGACATGACATGGGAC	||||||||||||||||||||||||	TCAATCACCCTGTACTGTACCCTG	gi|902230795|gb|KNA21995.1|( hypothetical protein SOVF_038060 [Spinacia oleracea])
Phn-m0121-5p	TRINITY_DN87171_c1_g2	0	1	21	3204	3224	GGAGTGACCTGAGACCACATG	|||||||||||||||||||||	CCTCACTGGACTCTGGTGTAC	gi|731325956|ref|XP_010673778.1|( PREDICTED: uncharacterized protein LOC104890105 isoform X2 [Beta vulgaris subsp. vulgaris])
	TRINITY_DN132373_c0_g1	2	1	21	92	112	GGAGTGACCTGAGACCACATG	||||:|||*||||||||*|||	CCTCGCTGCACTCTGGTTTAC	gi|760446525|ref|XP_011400331.1|( Zinc transporter ZIP9 [Auxenochlorella protothecoides])
Phn-m0147-3p	TRINITY_DN91873_c2_g1	0	1	24	350	373	AGGGATAACGTGGAGTTCACTTTA	||||||||||||||||||||||||	TCCCTATTGCACCTCAAGTGAAAT	gi|731333176|ref|XP_010677592.1|( PREDICTED: ABC transporter G family member 22 [Beta vulgaris subsp. vulgaris])
Phn-m0170-3p	TRINITY_DN87911_c2_g5	1.5	1	23	1435	1457	AAGGGAGGTTCCATCCTAAAACC	|||:||*||||||||||||||||	TTCTCTGCAAGGTAGGATTTTGG	gi|870840654|gb|KMS94874.1|( hypothetical protein BVRB_014490 [Beta vulgaris subsp. vulgaris])
	TRINITY_DN88877_c2_g9	1	1	23	1547	1569	AAGGGAGGTTCCATCCTAAAACC	|||||||:||||||||||||||*	TTCCCTCTAAGGTAGGATTTTGT	gi|731369043|ref|XP_010696425.1|( PREDICTED: uncharacterized protein LOC104908952 [Beta vulgaris subsp. vulgaris])
	TRINITY_DN91459_c0_g1	1	1	23	1778	1800	AAGGGAGGTTCCATCCTAAAACC	|||||||||||*|||||||||||	TTCCCTCCAAGATAGGATTTTGG	gi|870857082|gb|KMT08658.1|( hypothetical protein BVRB_6g139350 [Beta vulgaris subsp. vulgaris])
	TRINITY_DN91461_c1_g1	2	1	23	360	381	AAGGGAGGTTCCATCCTAAAACC	|*:||||||||||||||*|||||	TGTCCTCCAAGGTAGGA-TTTGG	gi|731339841|ref|XP_010681075.1|( PREDICTED: probable 20S rRNA accumulation protein 4 [Beta vulgaris subsp. vulgaris])
	TRINITY_DN92985_c2_g4	2	1	23	2127	2148	AAGGGAGGTTCCATCCTAAAACC	|||||||:|||||||*|*|||||	TTCCCTCTAAGGTAGAA-TTTGG	gi|147823225|emb|CAN68609.1|( hypothetical protein VITISV_012924 [Vitis vinifera])
	TRINITY_DN86056_c2_g2	1.5	1	23	3437	3459	AAGGGAGGTTCCATCCTAAAACC	*||||||||||||||||||||**	GTCCCTCCAAGGTAGGATTTTAA	gi|731360624|ref|XP_010691923.1|( PREDICTED: xylulose 5-phosphate/phosphate translocator, chloroplastic [Beta vulgaris subsp. vulgaris])
	TRINITY_DN86245_c0_g3	1.5	1	23	1198	1220	AAGGGAGGTTCCATCCTAAAACC	|||||*|:|||||||||||||||	TTCCCCCTAAGGTAGGATTTTGG	gi|731366393|ref|XP_010695046.1|( PREDICTED: G-type lectin S-receptor-like serine/threonine-protein kinase RLK1 [Beta vulgaris subsp. vulgaris])
	TRINITY_DN87163_c3_g1	2	1	23	519	542	AAGGGAGGTTCCATCCTA-AAACC	||:||||||||||||*||*|||||	TTTCCTCCAAGGTAGTATTTTTGG	gi|731375822|ref|XP_010667374.1|( PREDICTED: uncharacterized aarF domain-containing protein kinase At1g71810, chloroplastic isoform X2 [Beta vulgaris subsp. vulgaris])
	TRINITY_DN87219_c7_g1	1	1	23	72	94	AAGGGAGGTTCCATCCTAAAACC	|||||||*|||||||||||||||	TTCCCTCAAAGGTAGGATTTTGG	gi|976899289|gb|KVH87874.1|( hypothetical protein Ccrd_024806 [Cynara cardunculus var. scolymus])
	TRINITY_DN88321_c0_g1	1.5	1	23	28	50	AAGGGAGGTTCCATCCTAAAACC	|||:|||||||*|||||||||||	TTCTCTCCAAGATAGGATTTTGG	gi|731342502|ref|XP_010682425.1|( PREDICTED: ribose-phosphate pyrophosphokinase 3, mitochondrial [Beta vulgaris subsp. vulgaris])
	TRINITY_DN88416_c1_g3	1.5	1	23	254	276	AAGGGAGGTTCCATCCTAAAACC	|||||||||||||||*||||||*	TTCCCTCCAAGGTAGAATTTTGA	gi|703150530|ref|XP_010109886.1|( L-ascorbate oxidase-like protein [Morus notabilis])
	TRINITY_DN88534_c1_g3	2	1	23	1336	1358	AAGGGAGGTTCCATCCTAAAACC	||:||||:||||||*||||||||	TTTCCTCTAAGGTAAGATTTTGG	gi|731314245|ref|XP_010684748.1|( PREDICTED: uncharacterized protein LOC104899283 [Beta vulgaris subsp. vulgaris])
	TRINITY_DN89258_c0_g3	2	1	23	408	430	AAGGGAGGTTCCATCCTAAAACC	|||::||||||*|||||||||||	TTCTTTCCAAGATAGGATTTTGG	gi|731343949|ref|XP_010683151.1|( PREDICTED: putative heterogeneous nuclear ribonucleoprotein A1-like 3 isoform X1 [Beta vulgaris subsp. vulgaris])
	TRINITY_DN89985_c4_g1	1	1	23	3364	3386	AAGGGAGGTTCCATCCTAAAACC	|||||||||||*|||||||||||	TTCCCTCCAAGATAGGATTTTGG	gi|731323480|ref|XP_010672452.1|( PREDICTED: probable phosphoinositide phosphatase SAC9 [Beta vulgaris subsp. vulgaris])
	TRINITY_DN90206_c5_g1	2	1	23	319	341	AAGGGAGGTTCCATCCTAAAACC	|||||||*||*||||||||||||	TTCCCTCAAAAGTAGGATTTTGG	gi|902231731|gb|KNA22377.1|( hypothetical protein SOVF_034620 [Spinacia oleracea])
	TRINITY_DN90515_c4_g2	2	1	23	358	380	AAGGGAGGTTCCATCCTAAAACC	||:*|||:|||||||||||||||	TTTACTCTAAGGTAGGATTTTGG	gi|731332640|ref|XP_010677314.1|( PREDICTED: uncharacterized protein LOC104892985 [Beta vulgaris subsp. vulgaris])
	TRINITY_DN92012_c3_g2	1.5	1	23	16	38	AAGGGAGGTTCCATCCTAAAACC	|*:||||||||||||||||||||	TATCCTCCAAGGTAGGATTTTGG	gi|731351942|ref|XP_010687286.1|( PREDICTED: vacuolar cation/proton exchanger 2-like [Beta vulgaris subsp. vulgaris])
	TRINITY_DN92104_c6_g1	2	1	23	68	90	AAGGGAGGTTCCATCCTAAAACC	|*::|||||||||||||||||||	TATTCTCCAAGGTAGGATTTTGG	gi|902194541|gb|KNA12580.1|( hypothetical protein SOVF_124620 [Spinacia oleracea])
	TRINITY_DN92952_c3_g1	2	1	23	108	130	AAGGGAGGTTCCATCCTAAAACC	||||:|||||*||||||||||*|	TTCCTTCCAAAGTAGGATTTTAG	gi|902170200|gb|KNA07793.1|( hypothetical protein SOVF_168550 [Spinacia oleracea])
	TRINITY_DN93055_c2_g2	1	1	23	1110	1132	AAGGGAGGTTCCATCCTAAAACC	|||||||*|||||||||||||||	TTCCCTCAAAGGTAGGATTTTGG	gi|902198048|gb|KNA13589.1|( hypothetical protein SOVF_115320 [Spinacia oleracea])
	TRINITY_DN93275_c2_g2	1.5	1	23	64	86	AAGGGAGGTTCCATCCTAAAACC	||||||*|||||||||||||||*	TTCCCTACAAGGTAGGATTTTGA	gi|120026|sp|P04669.1|FER_SILLB(FER_SILLB RecName: Full=Ferredoxin, chloroplastic; Flags: Precursor)
Phn-m0173-5p	TRINITY_DN89061_c4_g5	1.8	1	23	2402	2425	TCGAACTCCTGACCACTTGG-TTA	|||||*|||||||||||||:*|||	AGCTTAAGGACTGGTGAACTAAAT	gi|727603405|ref|XP_010474748.1|( PREDICTED: transcription initiation factor TFIID subunit 3-like isoform X1 [Camelina sativa])
	TRINITY_DN91937_c1_g1	1.2	1	23	1491	1513	TCGAACTCCTGACCACTTGGTTA	||||||||*||||||||||:|||	AGCTTGAGAACTGGTGAACTAAT	gi|731341037|ref|XP_010681713.1|( PREDICTED: uncharacterized protein LOC104896642 [Beta vulgaris subsp. vulgaris])
	TRINITY_DN86953_c1_g1	1.5	1	23	1858	1880	TCGAACTCCTGACCACTTGGTTA	|||||*|||||||||||||*|||	AGCTTAAGGACTGGTGAACAAAT	gi|568832421|ref|XP_006470431.1|( PREDICTED: oligoribonuclease [Citrus sinensis])
	TRINITY_DN86966_c1_g1	1	1	23	607	629	TCGAACTCCTGACCACTTGGTTA	|*|||||||||||||||||||||	ACCTTGAGGACTGGTGAACCAAT	gi|731358455|ref|XP_010690759.1|( PREDICTED: B-box zinc finger protein 19-like isoform X1 [Beta vulgaris subsp. vulgaris])
	TRINITY_DN87898_c2_g2	1	1	23	123	145	TCGAACTCCTGACCACTTGGTTA	||:|||:||||||||||||||||	AGTTTGGGGACTGGTGAACCAAT	gi|697139440|ref|XP_009623809.1|( PREDICTED: regulatory-associated protein of TOR 1-like isoform X3 [Nicotiana tomentosiformis])
	TRINITY_DN87898_c6_g4	1	1	23	1368	1390	TCGAACTCCTGACCACTTGGTTA	||||||||||||*||||||||||	AGCTTGAGGACTAGTGAACCAAT	gi|902181316|gb|KNA09716.1|( hypothetical protein SOVF_151150 [Spinacia oleracea])
	TRINITY_DN88470_c4_g3	1.5	1	23	1439	1461	TCGAACTCCTGACCACTTGGTTA	||||||:|*||||||||||||||	AGCTTGGGAACTGGTGAACCAAT	gi|902216991|gb|KNA17583.1|( hypothetical protein SOVF_078190 [Spinacia oleracea])
	TRINITY_DN92623_c1_g1	2	1	23	1243	1265	TCGAACTCCTGACCACTTGGTTA	||||||:|||:||*|||||||||	AGCTTGGGGATTGATGAACCAAT	gi|731351339|ref|XP_010686985.1|( PREDICTED: uncharacterized protein LOC104901135 [Beta vulgaris subsp. vulgaris])
Phn-m0246-5p	TRINITY_DN85588_c0_g1	2	1	22	1993	2013	TTAGCCAAGTATCACGAGATCT	|||:||||::||||||||||*|	AATTGGTTTGTAGTGCTCTA-A	gi|571032303|gb|AHF21584.1|( late embryogenesis abundant protein [Tamarix hispida])
	TRINITY_DN93227_c3_g2	1	1	22	3168	3189	TTAGCCAAGTATCACGAGATCT	|||:||||||||||||||||*|	AATTGGTTCATAGTGCTCTAAA	gi|731345230|ref|XP_010683813.1|( PREDICTED: uncharacterized protein LOC104898425 [Beta vulgaris subsp. vulgaris])
	TRINITY_DN93266_c4_g1	1.8	1	22	566	587	TTAGCCAAGTATCACGAGATCT	|||:|||*|||||||||||:||	AATTGGTACATAGTGCTCTGGA	gi|731322585|ref|XP_010671977.1|( PREDICTED: putative DNA-binding protein ESCAROLA [Beta vulgaris subsp. vulgaris])
Phn-m0292-5p	TRINITY_DN92009_c0_g1	1.8	1	21	1812	1831	ACAGGATGTGTAAAAGCTGCC	|*|||||||||||||||*:||	TCTCCTACACATTTTCG-TGG	gi|902150802|gb|KNA05456.1|( hypothetical protein SOVF_190130 [Spinacia oleracea])

## Sheet: Upregulated in undeground parts
miRNAs	target gene	score	query_start	query_end	target_start	target_end	query_seq	align	target_seq	nr
miR164e	TRINITY_DN122176_c0_g1	2	1	21	202	222	TGGAGAAGCAGGGCACGTGAG	||||:|||||||||*||||*|	ACCTTTTCGTCCCGGGCACCC
	TRINITY_DN88902_c3_g2	2	1	21	3628	3647	TGGAGAAGCAGGGCACGTGAG	:||||||||||||*|||:*||	GCCTCTTCGTCCCATGCG-TC	gi|902174074|gb|KNA08358.1|( hypothetical protein SOVF_163350 [Spinacia oleracea])
	TRINITY_DN89225_c3_g8	2	1	21	265	286	TGGAGAAGCAGGGCACGTG-AG	||||||||||||||||*||**|	ACCTCTTCGTCCCGTGAACGAC	gi|870843012|gb|KMS96284.1|( hypothetical protein BVRB_000470 isoform B [Beta vulgaris subsp. vulgaris])
	TRINITY_DN92256_c1_g4	2	1	21	3115	3134	TGGAGAAGCAGGGCACGTGAG	|||||||||||:|||*||*||	ACCTCTTCGTCTCGTACA-TC	gi|965665814|dbj|BAT81302.1|( hypothetical protein VIGAN_03098900 [Vigna angularis var. angularis])
miR169a	TRINITY_DN93270_c2_g2	0	1	21	4408	4428	CAGCCAAGGATGACTTGCCGA	|||||||||||||||||||||	GTCGGTTCCTACTGAACGGCT	gi|731317972|ref|XP_010669470.1|( PREDICTED: uncharacterized protein LOC104886694 [Beta vulgaris subsp. vulgaris])
	TRINITY_DN88802_c2_g3	1.8	1	21	2771	2791	CAGCCAAGGATGACTTGCCGA	*||||||||||||*|||||:|	TTCGGTTCCTACTCAACGGTT	gi|902218597|gb|KNA18080.1|( hypothetical protein SOVF_074230 [Spinacia oleracea])
	TRINITY_DN107545_c0_g1	2	1	21	185	204	CAGCCAAGGATGACTTGCCGA	*||||||||||||*|||||*|	TTCGGTTCCTACTAAACGG-T	gi|108706462|gb|ABF94257.1|( CCAAT-binding transcription factor subunit B family protein, expressed [Oryza sativa Japonica Group])
	TRINITY_DN85133_c0_g1	2	1	21	1870	1889	CAGCCAAGGATGACTTGCCGA	*|||||||||||||||*||*|	CTCGGTTCCTACTGAA-GGGT	gi|731348126|ref|XP_010685336.1|( PREDICTED: nuclear transcription factor Y subunit A-3 [Beta vulgaris subsp. vulgaris])
miR169a-3p	TRINITY_DN93270_c2_g2	0	1	20	4354	4373	GGCAAGTTGTCCTTGGCTAC	||||||||||||||||||||	CCGTTCAACAGGAACCGATG	gi|731317972|ref|XP_010669470.1|( PREDICTED: uncharacterized protein LOC104886694 [Beta vulgaris subsp. vulgaris])
	TRINITY_DN29635_c0_g1	1.8	1	20	118	138	GGCAAGTTGTCCTTGGCT-AC	:||||:|||||||||:||*||	TCGTTTAACAGGAACTGACTG	gi|1002245256|ref|XP_015626810.1|( PREDICTED: uncharacterized WD repeat-containing protein C2A9.03 [Oryza sativa Japonica Group])
	TRINITY_DN85670_c0_g1	2	1	20	1952	1971	GGCAAGTTGTCCTTGGCTAC	:||||::||||||||:|:||	TCGTTTGACAGGAACTGGTG	gi|731330541|ref|XP_010676186.1|( PREDICTED: elongation factor G-2, chloroplastic [Beta vulgaris subsp. vulgaris])
miR169j	TRINITY_DN93270_c2_g2	0.8	1	21	4409	4428	TAGCCAAGGATGACTTGCCTG	:||||||||||||||||||*|	GTCGGTTCCTACTGAACGG-C	gi|731317972|ref|XP_010669470.1|( PREDICTED: uncharacterized protein LOC104886694 [Beta vulgaris subsp. vulgaris])
	TRINITY_DN88802_c2_g1	1.5	1	21	1896	1916	TAGCCAAGGATGACTTGCCTG	*||||||||||||*|||||||	TTCGGTTCCTACTCAACGGAC	gi|902218597|gb|KNA18080.1|( hypothetical protein SOVF_074230 [Spinacia oleracea])
	TRINITY_DN107545_c0_g1	2	1	21	183	204	TAGCCAAGGATGACTTGCC-TG	*||||||||||||*|||||*||	TTCGGTTCCTACTAAACGGTAC	gi|108706462|gb|ABF94257.1|( CCAAT-binding transcription factor subunit B family protein, expressed [Oryza sativa Japonica Group])
	TRINITY_DN85133_c0_g1	2	1	21	1870	1889	TAGCCAAGGATGACTTGCCTG	*|||||||||||||||*||::	CTCGGTTCCTACTGAA-GGGT	gi|731348126|ref|XP_010685336.1|( PREDICTED: nuclear transcription factor Y subunit A-3 [Beta vulgaris subsp. vulgaris])
miR169y	TRINITY_DN92989_c2_g1	1.8	1	21	1246	1266	TAGCCATGGATGAATTGCCTG	:||||||||||||*:||||||	GTCGGTACCTACTCGACGGAC	gi|902225666|gb|KNA20139.1|( hypothetical protein SOVF_055130 [Spinacia oleracea])
	TRINITY_DN81862_c0_g3	2	1	21	446	465	TAGCCATGGATGAATTGCCTG	*|||||||||||||:||**||	TTCGGTACCTACTTGAC-CAC	gi|125543561|gb|EAY89700.1|( hypothetical protein OsI_11237 [Oryza sativa Indica Group])
	TRINITY_DN87068_c2_g3	2	1	21	162	181	TAGCCATGGATGAATTGCCTG	*|||||||||||||||*||*|	TTCGGTACCTACTTAA-GGTC	gi|731350661|ref|XP_010686618.1|( PREDICTED: ankyrin repeat domain-containing protein 2-like [Beta vulgaris subsp. vulgaris])
miR172c	TRINITY_DN92408_c1_g1	0.5	1	21	3664	3684	AGAATCTTGATGATGCTGCAG	||||||:||||||||||||||	TCTTAGGACTACTACGACGTC	gi|944049345|gb|KQJ84986.1|( hypothetical protein BRADI_5g24100 [Brachypodium distachyon])
	TRINITY_DN85978_c0_g1	1.5	1	21	2464	2484	AGAATCTTGATGATGCTGCAG	|||||||||||||||||***|	TCTTAGAACTACTACGAGAGC	gi|902206717|gb|KNA15549.1|( hypothetical protein SOVF_097350 [Spinacia oleracea])
	TRINITY_DN92094_c0_g5	1.8	1	21	1948	1967	AGAATCTTGATGATGCTGCAG	||||||||||||*||||*||:	TCTTAGAACTACAACGA-GTT	gi|902208061|gb|KNA15844.1|( hypothetical protein SOVF_094540 [Spinacia oleracea])
	TRINITY_DN88877_c2_g2	2	1	21	879	898	AGAATCTTGATGATGCTGCAG	||||||*||||||||||*|*|	TCTTAGTACTACTACGA-GCC	gi|731372992|ref|XP_010666511.1|( PREDICTED: probable starch synthase 4, chloroplastic/amyloplastic [Beta vulgaris subsp. vulgaris])
	TRINITY_DN90343_c1_g6	2	1	21	2439	2458	AGAATCTTGATGATGCTGCAG	|||||||:||:|||||||**|	TCTTAGAGCTGCTACGAC-AC	gi|641841563|gb|KDO60475.1|( hypothetical protein CISIN_1g004078mg [Citrus sinensis])
miR1863a	TRINITY_DN86333_c0_g1	1	1	24	378	401	AGCTCTGATACCATGTTAGATTAG	||||||||||||||||||||*||*	TCGAGACTATGGTACAATCTTATA	gi|922411312|ref|XP_013633179.1|( PREDICTED: uncharacterized mitochondrial protein AtMg00810-like [Brassica oleracea var. oleracea])
	TRINITY_DN92262_c2_g1	1.8	1	24	633	657	AGCTCTGATACCATGTTAGAT-TAG	*|||||||||||||||||:||*||*	ACGAGACTATGGTACAATTTATATA	gi|731345898|ref|XP_010684164.1|( PREDICTED: E3 ubiquitin-protein ligase SGR9, amyloplastic [Beta vulgaris subsp. vulgaris])
	TRINITY_DN90620_c1_g1	2	1	24	1075	1098	AGCTCTGATACCATGTTAGATTAG	*|||||||||||||*|||||||*|	ACGAGACTATGGTAGAATCTAAAC	gi|1025322267|ref|XP_016504136.1|( PREDICTED: uncharacterized protein LOC107822148, partial [Nicotiana tabacum])
miR1863b	TRINITY_DN86333_c0_g1	1.5	1	24	377	401	AGCTCTGATACCATGTTA-ACTGTT	||||||||||||||||||*|*|:|:	TCGAGACTATGGTACAATCTTATAG	gi|922411312|ref|XP_013633179.1|( PREDICTED: uncharacterized mitochondrial protein AtMg00810-like [Brassica oleracea var. oleracea])
	TRINITY_DN92262_c2_g1	1.8	1	24	633	657	AGCTCTGATACCATGTTAACTGT-T	*||||||||||||||||||*|:|*|	ACGAGACTATGGTACAATTTATATA	gi|731345898|ref|XP_010684164.1|( PREDICTED: E3 ubiquitin-protein ligase SGR9, amyloplastic [Beta vulgaris subsp. vulgaris])
	TRINITY_DN92494_c1_g4	2	1	24	955	978	AGCTCTGATACCATGTTAACTGTT	||||*||||||||||||||*|*||	TCGATACTATGGTACAATTCAAAA	gi|1012324845|gb|KYP36798.1|( hypothetical protein KK1_042036 [Cajanus cajan])
miR6470	TRINITY_DN93169_c1_g1	1	1	21	871	891	CTCTGATATCATATTAAAAAA	|||||||||*|||||||||||	GAGACTATAATATAATTTTTT	gi|731317888|ref|XP_010669424.1|( PREDICTED: uncharacterized protein LOC104886656 [Beta vulgaris subsp. vulgaris])
	TRINITY_DN85611_c0_g1	2	1	21	193	213	CTCTGATATCATATTAAAAAA	*|*||||||||||||||||*|	AATACTATAGTATAATTTTAT	gi|567217582|ref|XP_006412420.1|( hypothetical protein EUTSA_v10026440mg [Eutrema salsugineum])
	TRINITY_DN89071_c1_g1	2	1	21	1001	1021	CTCTGATATCATATTAAAAAA	||||||||:|||||||*|*||	GAGACTATGGTATAATCTCTT	gi|731314782|ref|XP_010688421.1|( PREDICTED: uncharacterized protein LOC104902355 isoform X2 [Beta vulgaris subsp. vulgaris])
	TRINITY_DN90651_c3_g1	2	1	21	312	333	CTCTGATATCATATTAAAAA-A	*|||||||||||*|||||||*|	AAGACTATAGTACAATTTTTGT	gi|224096964|ref|XP_002310803.1|( hypothetical protein POPTR_0007s12780g [Populus trichocarpa])
Phn-m0046-5p	TRINITY_DN86665_c4_g1	0.5	1	24	102	125	GAAATCCATATCCAGATCCAATGG	|||||||||||||||||*||||||	CTTTAGGTATAGGTCTAAGTTACC	gi|698541792|ref|XP_009766202.1|( PREDICTED: uncharacterized protein LOC104217607 [Nicotiana sylvestris])
	TRINITY_DN86665_c2_g1	2	1	24	77	100	GAAATCCATATCCAGATCCAATGG	|*||||||||||||||||*||*||	CCTTAGGTATAGGTCTAGTTTTCC	gi|902180287|gb|KNA09519.1|( hypothetical protein SOVF_152860 isoform B [Spinacia oleracea])
	TRINITY_DN86665_c5_g1	2	1	24	36	59	GAAATCCATATCCAGATCCAATGG	|*||||||||||||:||*||||||	CCTTAGGTATAGGTTTAAGTTACC	gi|870865669|gb|KMT16719.1|( hypothetical protein BVRB_3g050030 [Beta vulgaris subsp. vulgaris])
Phn-m0135-3p	TRINITY_DN92925_c2_g3	0	1	22	736	757	TGAGATATCTGATCTTATCCCT	||||||||||||||||||||||	ACTCTATAGACTAGAATAGGGA	gi|731346970|ref|XP_010684735.1|( PREDICTED: uncharacterized protein LOC104899270 [Beta vulgaris subsp. vulgaris])
	TRINITY_DN93066_c3_g1	1	1	22	1099	1120	TGAGATATCTGATCTTATCCCT	|||||||:|||||||:||||||	ACTCTATGGACTAGAGTAGGGA	gi|731326376|ref|XP_010673988.1|( PREDICTED: serine/threonine-protein phosphatase 7 long form homolog [Beta vulgaris subsp. vulgaris])
