# Supplementary material for: Integrated Analyses of miRNAome and Transcriptome Reveal The Function of miRNAs in Morphogenesis of Organs and Defense of Endophytes in Pseudostellaria Heterophylla
Source: Research Square preprint supplement (doi:10.21203/rs.3.rs-239755/v1), 2021-03-01
Supplement: Supplementary file 7 [file 798f1b6243a04506a59e4f2d.xlsx]

## Sheet: Sheet1
Hormone	miRNA	query	target	score	query_start	query_end	target_start	target_end	query_seq	align	target_seq	cog	nog	cog_description	nog_description	KO_id	KO_name	paths	pfam	go	nr	swissprot
Auxin	TIR1	miR393a-5p	TRINITY_DN87142_c0_g3	1	1	22	46	68	TCCAAAGGGATCGCATTG-ATCC	||||||||||||||||||**|||	AGGTTTCCCTAGCGTAACAGAGG					K14485		map04075(Plant hormone signal transduction)		GO:0000822(molecular_function:inositol hexakisphosphate binding); GO:0009734(biological_process:auxin-activated signaling pathway)	gi|902176431|gb|KNA08757.1|( hypothetical protein SOVF_159810 [Spinacia oleracea])	gi|68053009|sp|Q570C0.2|TIR1_ARATH(RecName: Full=Protein TRANSPORT INHIBITOR RESPONSE 1; AltName: Full=Weak ethylene-insensitive protein 1)
	IAA	Nov-m0083-5p	TRINITY_DN91009_c0_g1	3	1	24	620	642	AAGCCCGTCTTACTTAAGAATGTT	||:*||||||||||:||||||*|*	TTTTGGCAGAATGAGTTCTTA-AC					K14484		map04075(Plant hormone signal transduction)	PF02309.13(AUX_IAA:AUX/IAA family)	GO:0009734(biological_process:auxin-activated signaling pathway); GO:0006355(biological_process:regulation of transcription, DNA-templated); GO:0005634(cellular_component:nucleus)	gi|731336269|ref|XP_010679164.1|( PREDICTED: auxin-induced protein 22D [Beta vulgaris subsp. vulgaris])	gi|11131103|sp|O24542.1|AX22D_VIGRR(RecName: Full=Auxin-induced protein 22D; AltName: Full=Indole-3-acetic acid-induced protein ARG13)
		miR172h-5p	TRINITY_DN88342_c0_g5	3	1	21	551	571	GGAGCACCATCAAGATTCACA	|||||||||||||**:||||*	CCTCGTGGTAGTTACGAGTGG		NOG130205(S:Function unknown )		NOG130205(auxin-responsive protein)	K14484		map04075(Plant hormone signal transduction)	PF02309.13(AUX_IAA:AUX/IAA family)	GO:0009734(biological_process:auxin-activated signaling pathway); GO:0006355(biological_process:regulation of transcription, DNA-templated); GO:0005634(cellular_component:nucleus)	gi|731336271|ref|XP_010679165.1|( PREDICTED: auxin-responsive protein IAA14-like [Beta vulgaris subsp. vulgaris])	gi|46395697|sp|Q38832.2|IAA14_ARATH(RecName: Full=Auxin-responsive protein IAA14; AltName: Full=Indoleacetic acid-induced protein 14; AltName: Full=Protein SOLITARY ROOT)
		Nov-m0013-3p	TRINITY_DN86210_c6_g4	2.5	1	22	1636	1657	ACGTAAACAAATGACTGGAACG	*||||||||||||**|||||||	GGCATTTGTTTACCTACCTTGC					K14484		map04075(Plant hormone signal transduction)		GO:0009734(biological_process:auxin-activated signaling pathway); GO:0006355(biological_process:regulation of transcription, DNA-templated); GO:0005634(cellular_component:nucleus)	gi|731370930|ref|XP_010665879.1|( PREDICTED: auxin-responsive protein IAA26 [Beta vulgaris subsp. vulgaris])	gi|46395896|sp|Q8LAL2.2|IAA26_ARATH(RecName: Full=Auxin-responsive protein IAA26; AltName: Full=Indoleacetic acid-induced protein 26; AltName: Full=Phytochrome-associated protein 1)
	K14486, ARF	Nov-m0155-5p	TRINITY_DN88708_c2_g4	2.2	1	24	85	108	TTGGAAACAATCTCTTTGTGATAT	::||||||||:||||||*|*||||	GGCCTTTGTTGGAGAAAGAGTATA					K14486		map04075(Plant hormone signal transduction)	PF02362.18(B3:B3 DNA binding domain)	GO:0009734(biological_process:auxin-activated signaling pathway); GO:0006355(biological_process:regulation of transcription, DNA-templated); GO:0003677(molecular_function:DNA binding); GO:0005634(cellular_component:nucleus)	gi|902208248|gb|KNA15895.1|( hypothetical protein SOVF_094090 [Spinacia oleracea])	gi|75225108|sp|Q6YVY0.1|ARFG_ORYSJ(RecName: Full=Auxin response factor 7)
		Nov-m0261-5p	TRINITY_DN85791_c2_g1	2.8	1	22	1325	1346	TGGAATTTAGGGTCGATCGACT	*||||:*|||||||||||*||:	CCCTTGTATCCCAGCTAGGTGG					K14486		map04075(Plant hormone signal transduction)	PF06507.10(Auxin_resp:Auxin response factor)		gi|731350212|ref|XP_010686390.1|( PREDICTED: auxin response factor 3 isoform X1 [Beta vulgaris subsp. vulgaris])	gi|46395605|sp|O23661.2|ARFC_ARATH(RecName: Full=Auxin response factor 3; AltName: Full=Protein ETTIN)
	GH3	Nov-m0019-3p	TRINITY_DN87788_c1_g1	3	1	24	17	40	AGGGTGATATCGAGACTCGGTACC	||||||*:*|||||||||||||*|	TCCCACCGCAGCTCTGAGCCATAG					K14487		map04075(Plant hormone signal transduction)	PF03321.10(GH3:GH3 auxin-responsive promoter)		gi|731337012|ref|XP_010679563.1|( PREDICTED: probable indole-3-acetic acid-amido synthetase GH3.1 [Beta vulgaris subsp. vulgaris])	gi|122167127|sp|Q0D4Z6.1|GH38_ORYSJ(RecName: Full=Probable indole-3-acetic acid-amido synthetase GH3.8; AltName: Full=Auxin-responsive GH3-like protein 8; Short=OsGH3-8 >gi|158513704|sp|A3BLS0.2|GH38_ORYSI RecName: Full=Probable indole-3-acetic acid-amido synthetase GH3.8; AltName: Full=Auxin-responsive GH3-like protein 8; Short=OsGH3-8)
		miR399p	TRINITY_DN87788_c1_g1	2.8	1	21	612	631	TGCCAAAGGAGAGTTGCCCTG	||*|||*||||||||||*||:	ACCGTTACCTCTCAACG-GAT					K14487		map04075(Plant hormone signal transduction)	PF03321.10(GH3:GH3 auxin-responsive promoter)		gi|731337012|ref|XP_010679563.1|( PREDICTED: probable indole-3-acetic acid-amido synthetase GH3.1 [Beta vulgaris subsp. vulgaris])	gi|122167127|sp|Q0D4Z6.1|GH38_ORYSJ(RecName: Full=Probable indole-3-acetic acid-amido synthetase GH3.8; AltName: Full=Auxin-responsive GH3-like protein 8; Short=OsGH3-8 >gi|158513704|sp|A3BLS0.2|GH38_ORYSI RecName: Full=Probable indole-3-acetic acid-amido synthetase GH3.8; AltName: Full=Auxin-responsive GH3-like protein 8; Short=OsGH3-8)
	SAUR	Nov-m0164-5p	TRINITY_DN83879_c0_g1	3	1	24	862	884	CTTTATATATATCAAGGGGTTACT	|||||:||*|*||||||||*||||	GAAATGTAAAAAGTTCCCC-ATGA					K14488		map04075(Plant hormone signal transduction)	PF02519.11(Auxin_inducible:Auxin responsive protein)		gi|902194911|gb|KNA12702.1|( hypothetical protein SOVF_123490 [Spinacia oleracea])	gi|75097353|sp|O22150.1|SAU36_ARATH(RecName: Full=Auxin-responsive protein SAUR36; AltName: Full=Protein RESPONSE TO AUXINS AND GIBBERELLINS 1; AltName: Full=Protein SENESCENCE-ASSOCIATED GENE 201; AltName: Full=Protein SMALL AUXIN UP RNA 36)
		miR395h	TRINITY_DN81457_c0_g1	3	1	21	600	619	ATGAAGTGTTTGGGGGAACTT	||||||::||||||:*|*|||	TACTTCGTAAACCCTAT-GAA					K14488		map04075(Plant hormone signal transduction)	PF02519.11(Auxin_inducible:Auxin responsive protein)		gi|731368383|ref|XP_010696118.1|( PREDICTED: uncharacterized protein LOC104908675 [Beta vulgaris subsp. vulgaris])	gi|75205112|sp|Q9SGU2.1|SAU71_ARATH(RecName: Full=Auxin-responsive protein SAUR71; AltName: Full=Protein SMALL AUXIN UP RNA 71)
		miR166e-5p	TRINITY_DN86187_c3_g4	3	1	21	163	182	GGAATGTTGGCTGGCTCGAGG	||||||:*||*||||||*|||	CCTTACGTCCAACCGAG-TCC					K14488		map04075(Plant hormone signal transduction)	PF02519.11(Auxin_inducible:Auxin responsive protein)	GO:0009733(biological_process:response to auxin)	gi|731370893|ref|XP_010665870.1|( PREDICTED: auxin-induced protein X15-like [Beta vulgaris subsp. vulgaris])	gi|75171034|sp|Q9FJG0.1|SAU20_ARATH(RecName: Full=Auxin-responsive protein SAUR20; AltName: Full=Protein SMALL AUXIN UP RNA 20)
		Nov-m0053-3p	TRINITY_DN91305_c3_g1	0.5	1	24	1103	1126	AATAATGTTATATTTACGATCAAC	||:|||||||||||||||||||||	TTGTTACAATATAAATGCTAGTTG					K14488		map04075(Plant hormone signal transduction)	PF02519.11(Auxin_inducible:Auxin responsive protein)	GO:0009733(biological_process:response to auxin)	gi|870843052|gb|KMS96319.1|( hypothetical protein BVRB_000330 [Beta vulgaris subsp. vulgaris])	gi|75216875|sp|Q9ZUZ3.1|SAU32_ARATH(RecName: Full=Auxin-responsive protein SAUR32; AltName: Full=Protein ABOLISHED APICAL HOOK MAINTENANCE 1; AltName: Full=Protein SMALL AUXIN UP RNA 32)
		Nov-m0069-3p	TRINITY_DN87722_c1_g4	2.5	1	23	1480	1502	AAACAACCTGATGTATCGGAGGG	|||*|||||:||||||*||||||	TTTATTGGATTACATAACCTCCC		NOG136475(S:Function unknown )		NOG136475(Auxin responsive protein)	K14488		map04075(Plant hormone signal transduction)	PF02519.11(Auxin_inducible:Auxin responsive protein)	GO:0009733(biological_process:response to auxin)	gi|902192613|gb|KNA12086.1|( hypothetical protein SOVF_129150 [Spinacia oleracea])	gi|75274140|sp|Q9LTV3.1|SAU72_ARATH(RecName: Full=Auxin-responsive protein SAUR72; AltName: Full=Protein SMALL AUXIN UP RNA 72)
		Nov-m0132-3p	TRINITY_DN87722_c1_g4	2.5	1	22	1487	1508	AAACGTAAACAACATGATGTAT	|||||||||*|||*|:||||||	TTTGCATTTATTGGATTACATA		NOG136475(S:Function unknown )		NOG136475(Auxin responsive protein)	K14488		map04075(Plant hormone signal transduction)	PF02519.11(Auxin_inducible:Auxin responsive protein)	GO:0009733(biological_process:response to auxin)	gi|902192613|gb|KNA12086.1|( hypothetical protein SOVF_129150 [Spinacia oleracea])	gi|75274140|sp|Q9LTV3.1|SAU72_ARATH(RecName: Full=Auxin-responsive protein SAUR72; AltName: Full=Protein SMALL AUXIN UP RNA 72)
		Nov-m0082-3p	TRINITY_DN87722_c1_g4	3	1	22	1486	1507	AACGTGAACAATCTGATGTATC	|||||:||*||:||:||||||*	TTGCATTTATTGGATTACATAA		NOG136475(S:Function unknown )		NOG136475(Auxin responsive protein)	K14488		map04075(Plant hormone signal transduction)	PF02519.11(Auxin_inducible:Auxin responsive protein)	GO:0009733(biological_process:response to auxin)	gi|902192613|gb|KNA12086.1|( hypothetical protein SOVF_129150 [Spinacia oleracea])	gi|75274140|sp|Q9LTV3.1|SAU72_ARATH(RecName: Full=Auxin-responsive protein SAUR72; AltName: Full=Protein SMALL AUXIN UP RNA 72)
		Nov-m0073-5p	TRINITY_DN81562_c0_g1	2.8	1	20	612	632	TGAGATTTGTTCTGAGCC-TC	::||||||||||||*:||*||	GTTCTAAACAAGACATGGCAG		NOG145202(S:Function unknown )		NOG145202(- Auxin-responsive SAUR gene family member, expressed)	K14488		map04075(Plant hormone signal transduction)	PF02519.11(Auxin_inducible:Auxin responsive protein)		gi|870843296|gb|KMS96503.1|( hypothetical protein BVRB_9g224440 [Beta vulgaris subsp. vulgaris])	gi|416642|sp|P32295.1|ARG7_VIGRR(RecName: Full=Indole-3-acetic acid-induced protein ARG7)
		Nov-m0238-3p	TRINITY_DN45225_c0_g1	2.8	1	22	174	194	GATGTTACTTGACACGATAGAC	*|||||*||||||||||:*||*	ATACAACGAACTGTGCTG-CTT					K14488		map04075(Plant hormone signal transduction)	PF02519.11(Auxin_inducible:Auxin responsive protein)		gi|1009149304|ref|XP_015892409.1|( PREDICTED: auxin-induced protein 15A-like [Ziziphus jujuba])	gi|75102510|sp|Q41220.1|SAU15_ARATH(RecName: Full=Auxin-responsive protein SAUR15; AltName: Full=Protein SMALL AUXIN UP RNA 15; AltName: Full=Protein SMALL AUXIN UP RNA FROM ARABIDOPSIS COLUMBIA 1)
		Nov-m0132-3p	TRINITY_DN91305_c3_g2	2.5	1	22	1475	1495	AAACGTAAACAACATGATGTAT	||||:*|||||||||:||*|||	TTTGTTTTTGTTGTATTA-ATA					K14488		map04075(Plant hormone signal transduction)	PF02519.11(Auxin_inducible:Auxin responsive protein)	GO:0009733(biological_process:response to auxin)	gi|870843052|gb|KMS96319.1|( hypothetical protein BVRB_000330 [Beta vulgaris subsp. vulgaris])	gi|75216875|sp|Q9ZUZ3.1|SAU32_ARATH(RecName: Full=Auxin-responsive protein SAUR32; AltName: Full=Protein ABOLISHED APICAL HOOK MAINTENANCE 1; AltName: Full=Protein SMALL AUXIN UP RNA 32)
		Nov-m0220-5p	TRINITY_DN86899_c2_g1	1.5	1	24	2391	2414	AAGGCACTGGGATAATGTTGTTGT	|||:|||||*||||||||||||||	TTCTGTGACACTATTACAACAACA					K14488		map04075(Plant hormone signal transduction)	PF02519.11(Auxin_inducible:Auxin responsive protein)	GO:0009733(biological_process:response to auxin)	gi|902206051|gb|KNA15361.1|( hypothetical protein SOVF_098900 [Spinacia oleracea])	gi|75171033|sp|Q9FJF9.1|SAU21_ARATH(RecName: Full=Auxin-responsive protein SAUR21; AltName: Full=Protein SMALL AUXIN UP RNA 21)
Zeatin	AHP	Nov-m0193-5p	TRINITY_DN77728_c0_g1	2.8	1	24	396	418	GATTTTCTTTTGCGAATTCCGGGA	*||||||||:::|||||*|||:||	GTAAAAGAAGGTGCTTA-GGCTCT	COG2198(T:Signal transduction mechanisms )		COG2198(Histidine kinase)		K14490		map04075(Plant hormone signal transduction)	PF01627.20(Hpt:Hpt domain)	GO:0004871(molecular_function:signal transducer activity); GO:0005622(cellular_component:intracellular); GO:0000160(biological_process:phosphorelay signal transduction system)	gi|763767906|gb|KJB35121.1|( hypothetical protein B456_006G101300 [Gossypium raimondii])	gi|55976775|sp|Q9SSC9.2|AHP6_ARATH(RecName: Full=Pseudo histidine-containing phosphotransfer protein 6; AltName: Full=Histidine-containing phosphotransfer protein 6)
	ARR-B	Nov-m0024-3p	TRINITY_DN89566_c1_g1	2.5	1	21	28	48	TTTTGAACAATGTATACAACT	|||||||*||||||||*||*|	AAAACTTTTTACATATTTTTA					K14491		map04075(Plant hormone signal transduction)	PF00072.21(Response_reg:Response regulator receiver domain); PF09184.8(PPP4R2:PPP4R2); PF06512.10(Na_trans_assoc:Sodium ion transport-associated)		gi|902181505|gb|KNA09759.1|( hypothetical protein SOVF_150660 [Spinacia oleracea])	gi|378405150|sp|P62598.2|ARR12_ARATH(RecName: Full=Two-component response regulator ARR12)
		Nov-m0216-5p	TRINITY_DN91803_c3_g5	2.5	1	24	572	595	GTTGTATGTATATAACGGGGTTTT	||||||:|:|||:|||||:*||:|	CAACATGCGTATGTTGCCTAAAGA					K14491		map04075(Plant hormone signal transduction)	PF00072.21(Response_reg:Response regulator receiver domain); PF00249.28(Myb_DNA-binding:Myb-like DNA-binding domain)	GO:0000160(biological_process:phosphorelay signal transduction system); GO:0006355(biological_process:regulation of transcription, DNA-templated); GO:0003677(molecular_function:DNA binding); GO:0003700(molecular_function:transcription factor activity, sequence-specific DNA binding); GO:0005634(cellular_component:nucleus)	gi|731320632|ref|XP_010670915.1|( PREDICTED: two-component response regulator ARR2 isoform X2 [Beta vulgaris subsp. vulgaris])	gi|50400708|sp|Q9ZWJ9.1|ARR2_ARATH(RecName: Full=Two-component response regulator ARR2; AltName: Full=Receiver-like protein 5)
		Nov-m0087-5p	TRINITY_DN91803_c3_g5	3	1	22	782	803	TAAGGCCATGTTCTTTTGGACT	|*|||*||||:|||||||||*|	AATCCAGTACGAGAAAACCTAA					K14491		map04075(Plant hormone signal transduction)	PF00072.21(Response_reg:Response regulator receiver domain); PF00249.28(Myb_DNA-binding:Myb-like DNA-binding domain)	GO:0000160(biological_process:phosphorelay signal transduction system); GO:0006355(biological_process:regulation of transcription, DNA-templated); GO:0003677(molecular_function:DNA binding); GO:0003700(molecular_function:transcription factor activity, sequence-specific DNA binding); GO:0005634(cellular_component:nucleus)	gi|731320632|ref|XP_010670915.1|( PREDICTED: two-component response regulator ARR2 isoform X2 [Beta vulgaris subsp. vulgaris])	gi|50400708|sp|Q9ZWJ9.1|ARR2_ARATH(RecName: Full=Two-component response regulator ARR2; AltName: Full=Receiver-like protein 5)
	ARR-A	Nov-m0206-5p	TRINITY_DN89814_c0_g10	3	1	22	529	549	TTGATATGTCCATTTTAAGTAG	*|:||||*||||||||||*:|:	TATTATAGAGGTAAAATT-GTT	COG0784(T:Signal transduction mechanisms )		COG0784(response regulator)		K14492		map04075(Plant hormone signal transduction)	PF00072.21(Response_reg:Response regulator receiver domain)	GO:0005622(cellular_component:intracellular); GO:0000160(biological_process:phosphorelay signal transduction system)	gi|731319827|ref|XP_010670482.1|( PREDICTED: two-component response regulator ARR9-like [Beta vulgaris subsp. vulgaris])	gi|51315815|sp|O80366.1|ARR9_ARATH(RecName: Full=Two-component response regulator ARR9; AltName: Full=Response reactor 4)
	PYL	Nov-m0106-5p	TRINITY_DN84514_c0_g1	2.5	1	22	262	282	GGGAATATTGTTTTAATGGATG	:|:||||||:|||:|||*||:|	TCTTTATAATAAAGTTA-CTGC		NOG128830(S:Function unknown )		NOG128830(abscisic acid receptor)	K14496		map04016(MAPK signaling pathway - plant); map04075(Plant hormone signal transduction)	PF10604.6(Polyketide_cyc2:Polyketide cyclase / dehydrase and lipid transport); PF03364.17(Polyketide_cyc:Polyketide cyclase / dehydrase and lipid transport)		gi|731332499|ref|XP_010677239.1|( PREDICTED: abscisic acid receptor PYR1 [Beta vulgaris subsp. vulgaris])	gi|75219670|sp|O49686.1|PYR1_ARATH(RecName: Full=Abscisic acid receptor PYR1; AltName: Full=ABI1-binding protein 6; AltName: Full=Protein PYRABACTIN RESISTANCE 1; AltName: Full=Regulatory components of ABA receptor 11)
		miR156e	TRINITY_DN89246_c1_g4	3	1	21	306	326	TTGACAGAAGATAGAGAGCAC	*|:||||||||||:|:|**||	TATTGTCTTCTATTTTTGATG					K14496		map04016(MAPK signaling pathway - plant); map04075(Plant hormone signal transduction)			gi|764644833|ref|XP_011457407.1|( PREDICTED: abscisic acid receptor PYL8-like [Fragaria vesca subsp. vesca])	gi|75170450|sp|Q9FGM1.1|PYL8_ARATH(RecName: Full=Abscisic acid receptor PYL8; AltName: Full=ABI1-binding protein 1; AltName: Full=PYR1-like protein 8; AltName: Full=Regulatory components of ABA receptor 3)
		Nov-m0132-3p	TRINITY_DN85300_c5_g4	2	1	22	265	286	AAACGTAAACAACATGATGTAT	|||||||||*|||*||||||||	TTTGCATTTTTTGAACTACATA		NOG129632(S:Function unknown )		NOG129632(abscisic acid receptor)	K14496		map04016(MAPK signaling pathway - plant); map04075(Plant hormone signal transduction)	PF10604.6(Polyketide_cyc2:Polyketide cyclase / dehydrase and lipid transport); PF00407.16(Bet_v_1:Pathogenesis-related protein Bet v I family)		gi|731357127|ref|XP_010690042.1|( PREDICTED: abscisic acid receptor PYL2-like [Beta vulgaris subsp. vulgaris])	gi|75100027|sp|O80992.1|PYL2_ARATH(RecName: Full=Abscisic acid receptor PYL2; AltName: Full=PYR1-like protein 2; AltName: Full=Regulatory components of ABA receptor 14)
		Nov-m0107-3p	TRINITY_DN85300_c5_g4	2.5	1	24	267	290	AATTAAACGTAAACAATCTGATGT	|||:|||||||||*||:*||||||	TTAGTTTGCATTTTTTGAACTACA		NOG129632(S:Function unknown )		NOG129632(abscisic acid receptor)	K14496		map04016(MAPK signaling pathway - plant); map04075(Plant hormone signal transduction)	PF10604.6(Polyketide_cyc2:Polyketide cyclase / dehydrase and lipid transport); PF00407.16(Bet_v_1:Pathogenesis-related protein Bet v I family)		gi|731357127|ref|XP_010690042.1|( PREDICTED: abscisic acid receptor PYL2-like [Beta vulgaris subsp. vulgaris])	gi|75100027|sp|O80992.1|PYL2_ARATH(RecName: Full=Abscisic acid receptor PYL2; AltName: Full=PYR1-like protein 2; AltName: Full=Regulatory components of ABA receptor 14)
		Nov-m0108-3p	TRINITY_DN85300_c5_g4	2.5	1	24	267	290	AATTAAACGTAAACAATCTGATGT	|||:|||||||||*||:*||||||	TTAGTTTGCATTTTTTGAACTACA		NOG129632(S:Function unknown )		NOG129632(abscisic acid receptor)	K14496		map04016(MAPK signaling pathway - plant); map04075(Plant hormone signal transduction)	PF10604.6(Polyketide_cyc2:Polyketide cyclase / dehydrase and lipid transport); PF00407.16(Bet_v_1:Pathogenesis-related protein Bet v I family)		gi|731357127|ref|XP_010690042.1|( PREDICTED: abscisic acid receptor PYL2-like [Beta vulgaris subsp. vulgaris])	gi|75100027|sp|O80992.1|PYL2_ARATH(RecName: Full=Abscisic acid receptor PYL2; AltName: Full=PYR1-like protein 2; AltName: Full=Regulatory components of ABA receptor 14)
ABA	PP2C	Nov-m0036-5p	TRINITY_DN86665_c2_g1	0	1	23	178	200	ATGGACTGGATCTGGATTGGATC	|||||||||||||||||||||||	TACCTGACCTAGACCTAACCTAG					K14497		map04016(MAPK signaling pathway - plant); map04075(Plant hormone signal transduction)	PF00481.18(PP2C:Protein phosphatase 2C)	GO:0004721(molecular_function:phosphoprotein phosphatase activity); GO:0043169(molecular_function:cation binding)	gi|902180287|gb|KNA09519.1|( hypothetical protein SOVF_152860 isoform B [Spinacia oleracea])	gi|75286811|sp|Q5SN75.1|P2C08_ORYSJ(RecName: Full=Probable protein phosphatase 2C 8; Short=OsPP2C08)
		Nov-m0018-5p	TRINITY_DN86665_c2_g1	1.5	1	24	110	133	AATCCAGTCCAGATCCAATGGATC	|||*|||||||:||||||||||||	TTAAGTCAGGTTTAGGTTACCTAG					K14497		map04016(MAPK signaling pathway - plant); map04075(Plant hormone signal transduction)	PF00481.18(PP2C:Protein phosphatase 2C)	GO:0004721(molecular_function:phosphoprotein phosphatase activity); GO:0043169(molecular_function:cation binding)	gi|902180287|gb|KNA09519.1|( hypothetical protein SOVF_152860 isoform B [Spinacia oleracea])	gi|75286811|sp|Q5SN75.1|P2C08_ORYSJ(RecName: Full=Probable protein phosphatase 2C 8; Short=OsPP2C08)
		Nov-m0046-5p	TRINITY_DN86665_c2_g1	2	1	24	77	100	GAAATCCATATCCAGATCCAATGG	|*||||||||||||||||*||*||	CCTTAGGTATAGGTCTAGTTTTCC					K14497		map04016(MAPK signaling pathway - plant); map04075(Plant hormone signal transduction)	PF00481.18(PP2C:Protein phosphatase 2C)	GO:0004721(molecular_function:phosphoprotein phosphatase activity); GO:0043169(molecular_function:cation binding)	gi|902180287|gb|KNA09519.1|( hypothetical protein SOVF_152860 isoform B [Spinacia oleracea])	gi|75286811|sp|Q5SN75.1|P2C08_ORYSJ(RecName: Full=Probable protein phosphatase 2C 8; Short=OsPP2C08)
		Nov-m0122-3p	TRINITY_DN86665_c2_g1	2.2	1	23	46	68	TGGATATAAATCTTTCGTGGATT	|||||||*|||||||*||||||:	ACCTATACTTAGAAAACACCTAG					K14497		map04016(MAPK signaling pathway - plant); map04075(Plant hormone signal transduction)	PF00481.18(PP2C:Protein phosphatase 2C)	GO:0004721(molecular_function:phosphoprotein phosphatase activity); GO:0043169(molecular_function:cation binding)	gi|902180287|gb|KNA09519.1|( hypothetical protein SOVF_152860 isoform B [Spinacia oleracea])	gi|75286811|sp|Q5SN75.1|P2C08_ORYSJ(RecName: Full=Probable protein phosphatase 2C 8; Short=OsPP2C08)
		Nov-m0021-5p	TRINITY_DN86665_c2_g1	2.5	1	24	178	201	AATGAACCGGATCTGGACTGGATC	||||*||*|||||||||*||||||	TTACCTGACCTAGACCTAACCTAG					K14497		map04016(MAPK signaling pathway - plant); map04075(Plant hormone signal transduction)	PF00481.18(PP2C:Protein phosphatase 2C)	GO:0004721(molecular_function:phosphoprotein phosphatase activity); GO:0043169(molecular_function:cation binding)	gi|902180287|gb|KNA09519.1|( hypothetical protein SOVF_152860 isoform B [Spinacia oleracea])	gi|75286811|sp|Q5SN75.1|P2C08_ORYSJ(RecName: Full=Probable protein phosphatase 2C 8; Short=OsPP2C08)
	SNRK2	Nov-m0087-5p	TRINITY_DN90548_c2_g1	2.2	1	22	1640	1660	TAAGGCCATGTTCTTTTGGACT	|*|||||||||||||||:|**|	AATCCGGTACAAGAAAATC-AA					K14498		map04016(MAPK signaling pathway - plant); map04075(Plant hormone signal transduction)			gi|641830074|gb|KDO49174.1|( hypothetical protein CISIN_1g017936mg [Citrus sinensis])	gi|158513710|sp|A2ZAB5.2|SAPK3_ORYSI(RecName: Full=Serine/threonine-protein kinase SAPK3; AltName: Full=Osmotic stress/abscisic acid-activated protein kinase 3; AltName: Full=Protein kinase REK >gi|158517784|sp|P0C5D6.1|SAPK3_ORYSJ RecName: Full=Serine/threonine-protein kinase SAPK3; AltName: Full=Osmotic stress/abscisic acid-activated protein kinase 3; AltName: Full=Protein kinase REK)
		Nov-m0154-3p	TRINITY_DN90548_c2_g1	2.2	1	24	1517	1540	AATTTCAGTCCAAAATAACAGGGC	||||||||||||*|||||||*|:*	TTAAAGTCAGGTATTATTGTACTT					K14498		map04016(MAPK signaling pathway - plant); map04075(Plant hormone signal transduction)			gi|641830074|gb|KDO49174.1|( hypothetical protein CISIN_1g017936mg [Citrus sinensis])	gi|158513710|sp|A2ZAB5.2|SAPK3_ORYSI(RecName: Full=Serine/threonine-protein kinase SAPK3; AltName: Full=Osmotic stress/abscisic acid-activated protein kinase 3; AltName: Full=Protein kinase REK >gi|158517784|sp|P0C5D6.1|SAPK3_ORYSJ RecName: Full=Serine/threonine-protein kinase SAPK3; AltName: Full=Osmotic stress/abscisic acid-activated protein kinase 3; AltName: Full=Protein kinase REK)
		Nov-m0046-5p	TRINITY_DN85640_c0_g7	3	1	24	800	822	GAAATCCATATCCAGATCCAATGG	|**||||||||||||||||*|||*	CAGTAGGTATAGGTCTAGG-TACG					K14498		map04016(MAPK signaling pathway - plant); map04075(Plant hormone signal transduction)		GO:0006468(biological_process:protein phosphorylation); GO:0005524(molecular_function:ATP binding); GO:0004674(molecular_function:protein serine/threonine kinase activity)	gi|568823726|ref|XP_006466260.1|( PREDICTED: serine/threonine-protein kinase SAPK2 [Citrus sinensis])	gi|75337420|sp|Q9SMQ4.1|SRK2F_ARATH(RecName: Full=Serine/threonine-protein kinase SRK2F; AltName: Full=OST1-kinase-like 5; AltName: Full=SNF1-related kinase 2.7; Short=SnRK2.7)
		Nov-m0087-5p	TRINITY_DN85783_c4_g2	2.2	1	22	772	793	TAAGGCCATGTTCTTTTGGACT	|*|||*||||||||||||:|||	AATCCAGTACAAGAAAACTTGA					K14498		map04016(MAPK signaling pathway - plant); map04075(Plant hormone signal transduction)	PF00069.22(Pkinase:Protein kinase domain); PF07714.14(Pkinase_Tyr:Protein tyrosine kinase)	GO:0006468(biological_process:protein phosphorylation); GO:0005524(molecular_function:ATP binding); GO:0004674(molecular_function:protein serine/threonine kinase activity)	gi|1026029752|ref|XP_016561134.1|( PREDICTED: serine/threonine-protein kinase SRK2I [Capsicum annuum])	gi|71153749|sp|Q75H77.1|SAPKA_ORYSJ(RecName: Full=Serine/threonine-protein kinase SAPK10; AltName: Full=Osmotic stress/abscisic acid-activated protein kinase 10)
		Nov-m0097-3p	TRINITY_DN85783_c4_g2	2.5	1	22	1399	1421	TGAGACAAAAACGATAAA-CTGA	|||:|||||||||||*||**|||	ACTTTGTTTTTGCTACTTTTACT					K14498		map04016(MAPK signaling pathway - plant); map04075(Plant hormone signal transduction)	PF00069.22(Pkinase:Protein kinase domain); PF07714.14(Pkinase_Tyr:Protein tyrosine kinase)	GO:0006468(biological_process:protein phosphorylation); GO:0005524(molecular_function:ATP binding); GO:0004674(molecular_function:protein serine/threonine kinase activity)	gi|1026029752|ref|XP_016561134.1|( PREDICTED: serine/threonine-protein kinase SRK2I [Capsicum annuum])	gi|71153749|sp|Q75H77.1|SAPKA_ORYSJ(RecName: Full=Serine/threonine-protein kinase SAPK10; AltName: Full=Osmotic stress/abscisic acid-activated protein kinase 10)
		Nov-m0185-3p	TRINITY_DN85783_c4_g2	2.5	1	22	1400	1422	ATGAGACAAAAACCATGA-ATTG	||||:||||||||*||||*|*||	TACTTTGTTTTTGCTACTTTTAC					K14498		map04016(MAPK signaling pathway - plant); map04075(Plant hormone signal transduction)	PF00069.22(Pkinase:Protein kinase domain); PF07714.14(Pkinase_Tyr:Protein tyrosine kinase)	GO:0006468(biological_process:protein phosphorylation); GO:0005524(molecular_function:ATP binding); GO:0004674(molecular_function:protein serine/threonine kinase activity)	gi|1026029752|ref|XP_016561134.1|( PREDICTED: serine/threonine-protein kinase SRK2I [Capsicum annuum])	gi|71153749|sp|Q75H77.1|SAPKA_ORYSJ(RecName: Full=Serine/threonine-protein kinase SAPK10; AltName: Full=Osmotic stress/abscisic acid-activated protein kinase 10)
		Nov-m0087-5p	TRINITY_DN85783_c4_g2	2.8	1	22	1008	1028	TAAGGCCATGTTCTTTTGGACT	|||||||*|||||||||***|:	ATTCCGGGACAAGAAAA-AAGG					K14498		map04016(MAPK signaling pathway - plant); map04075(Plant hormone signal transduction)	PF00069.22(Pkinase:Protein kinase domain); PF07714.14(Pkinase_Tyr:Protein tyrosine kinase)	GO:0006468(biological_process:protein phosphorylation); GO:0005524(molecular_function:ATP binding); GO:0004674(molecular_function:protein serine/threonine kinase activity)	gi|1026029752|ref|XP_016561134.1|( PREDICTED: serine/threonine-protein kinase SRK2I [Capsicum annuum])	gi|71153749|sp|Q75H77.1|SAPKA_ORYSJ(RecName: Full=Serine/threonine-protein kinase SAPK10; AltName: Full=Osmotic stress/abscisic acid-activated protein kinase 10)
		Nov-m0155-5p	TRINITY_DN88490_c0_g3	2.5	1	24	382	405	TTGGAAACAATCTCTTTGTGATAT	:*||||||||:||||||||||:*|	GCCCTTTGTTGGAGAAACACTGGA					K14498		map04016(MAPK signaling pathway - plant); map04075(Plant hormone signal transduction)		GO:0006468(biological_process:protein phosphorylation); GO:0005524(molecular_function:ATP binding); GO:0004674(molecular_function:protein serine/threonine kinase activity)	gi|514815358|ref|XP_004982436.1|( PREDICTED: serine/threonine-protein kinase SAPK10 [Setaria italica])	gi|71153748|sp|Q75V57.1|SAPK9_ORYSJ(RecName: Full=Serine/threonine-protein kinase SAPK9; AltName: Full=Osmotic stress/abscisic acid-activated protein kinase 9)
	ABF	Nov-m0261-5p	TRINITY_DN87457_c7_g4	3	1	22	1248	1268	TGGAATTTAGGGTCGATCGACT	*:||||||*||||||||*||*|	TTCTTAAAGCCCAGCTA-CTTA					K14432		map04075(Plant hormone signal transduction)	PF00170.18(bZIP_1:bZIP transcription factor); PF07716.12(bZIP_2:Basic region leucine zipper); PF03131.14(bZIP_Maf:bZIP Maf transcription factor)		gi|902219656|gb|KNA18374.1|( hypothetical protein SOVF_071310 [Spinacia oleracea])	gi|75313515|sp|Q9SJN0.1|ABI5_ARATH(RecName: Full=Protein ABSCISIC ACID-INSENSITIVE 5; AltName: Full=Dc3 promoter-binding factor 1; Short=AtDPBF1; AltName: Full=Protein GROWTH-INSENSITIVITY TO ABA 1; AltName: Full=bZIP transcription factor 39; Short=AtbZIP39)
Gibberellin	GID2, SLY1	Nov-m0174-5p	TRINITY_DN88751_c3_g2	2.8	1	22	1226	1247	GTAAACTGAATACTGAGTATTG	**||||||||||||:||||*:|	ATTTTGACTTATGATTCATCGC		NOG143654(S:Function unknown )		NOG143654(F-box protein GID2-like)	K14495		map04075(Plant hormone signal transduction)	PF12937.4(F-box-like:F-box-like); PF00646.30(F-box:F-box domain)		gi|902038256|gb|KNA02713.1|( hypothetical protein SOVF_216090 [Spinacia oleracea])	gi|75266339|sp|Q9STX3.1|GID2_ARATH(RecName: Full=F-box protein GID2; AltName: Full=Protein SLEEPY 1)
Ethylene	MPK6	Nov-m0087-5p	TRINITY_DN91072_c2_g2	2	1	22	1460	1481	TAAGGCCATGTTCTTTTGGACT	|*|||||*||||||||||||||	AATCCGGGACAAGAAAACCTGA		NOG00563(T:Signal transduction mechanisms )		NOG00563(Mitogen-activated protein kinase)	K14512		map04016(MAPK signaling pathway - plant); map04075(Plant hormone signal transduction)	PF00069.22(Pkinase:Protein kinase domain); PF07714.14(Pkinase_Tyr:Protein tyrosine kinase)	GO:0004707(molecular_function:MAP kinase activity); GO:0005622(cellular_component:intracellular); GO:0000165(biological_process:MAPK cascade); GO:0005524(molecular_function:ATP binding)	gi|950645818|gb|ALN38712.1|( MAPK1 [Dianthus caryophyllus])	gi|585519|sp|Q07176.1|MMK1_MEDSA(RecName: Full=Mitogen-activated protein kinase homolog MMK1; AltName: Full=MAP kinase ERK1; AltName: Full=MAP kinase MSK7)
		Nov-m0154-3p	TRINITY_DN91072_c2_g2	2.2	1	24	1356	1379	AATTTCAGTCCAAAATAACAGGGC	|||||||||*|||||*|||||:||	TTAAAGTCAAGTTTTCTTGTCTCG		NOG00563(T:Signal transduction mechanisms )		NOG00563(Mitogen-activated protein kinase)	K14512		map04016(MAPK signaling pathway - plant); map04075(Plant hormone signal transduction)	PF00069.22(Pkinase:Protein kinase domain); PF07714.14(Pkinase_Tyr:Protein tyrosine kinase)	GO:0004707(molecular_function:MAP kinase activity); GO:0005622(cellular_component:intracellular); GO:0000165(biological_process:MAPK cascade); GO:0005524(molecular_function:ATP binding)	gi|950645818|gb|ALN38712.1|( MAPK1 [Dianthus caryophyllus])	gi|585519|sp|Q07176.1|MMK1_MEDSA(RecName: Full=Mitogen-activated protein kinase homolog MMK1; AltName: Full=MAP kinase ERK1; AltName: Full=MAP kinase MSK7)
		Nov-m0281-5p	TRINITY_DN91072_c2_g2	3	1	22	1356	1377	ATTCAGTCTAAAAGAACATGGT	*||||||*:|||||||||*:|:	AAAGTCAAGTTTTCTTGTCTCG		NOG00563(T:Signal transduction mechanisms )		NOG00563(Mitogen-activated protein kinase)	K14512		map04016(MAPK signaling pathway - plant); map04075(Plant hormone signal transduction)	PF00069.22(Pkinase:Protein kinase domain); PF07714.14(Pkinase_Tyr:Protein tyrosine kinase)	GO:0004707(molecular_function:MAP kinase activity); GO:0005622(cellular_component:intracellular); GO:0000165(biological_process:MAPK cascade); GO:0005524(molecular_function:ATP binding)	gi|950645818|gb|ALN38712.1|( MAPK1 [Dianthus caryophyllus])	gi|585519|sp|Q07176.1|MMK1_MEDSA(RecName: Full=Mitogen-activated protein kinase homolog MMK1; AltName: Full=MAP kinase ERK1; AltName: Full=MAP kinase MSK7)
	EBF1_2	Nov-m0033-5p	TRINITY_DN85400_c2_g10	3	1	24	1772	1794	GTATTCTTTTGGACTGCGGTTCTC	||*||||||||:||||*|||||*|	CAGAAGAAAACTTGACACCAAG-G					K14515		map04016(MAPK signaling pathway - plant); map04075(Plant hormone signal transduction)	PF13516.3(LRR_6:Leucine Rich repeat); PF12799.4(LRR_4:Leucine Rich repeats (2 copies)); PF12937.4(F-box-like:F-box-like); PF00646.30(F-box:F-box domain)		gi|731316612|ref|XP_010696236.1|( PREDICTED: EIN3-binding F-box protein 1 [Beta vulgaris subsp. vulgaris])	gi|75337355|sp|Q9SKK0.1|EBF1_ARATH(RecName: Full=EIN3-binding F-box protein 1; AltName: Full=F-box/LRR-repeat protein 6)
	EIN3	miR166e-5p	TRINITY_DN68795_c0_g1	2.2	1	21	167	188	GGAATGTTGGCTGGCTCGAG-G	|||||||||||||:*||:||*|	CCTTACAACCGACTAAGTTCAC					K14514		map04016(MAPK signaling pathway - plant); map04075(Plant hormone signal transduction)			gi|55975504|gb|AAV68142.1|( ethylene insensitive 3-like 4 [Dianthus caryophyllus])	gi|37078133|sp|O24606.1|EIN3_ARATH(RecName: Full=Protein ETHYLENE INSENSITIVE 3)
		Nov-m0122-3p	TRINITY_DN90933_c4_g3	3	1	23	2343	2364	TGGATATAAATCTTTCGTGGATT	::||:|||||||||||:*::||:	GTCTGTATTTAGAAAGT-TTTAG					K14514		map04016(MAPK signaling pathway - plant); map04075(Plant hormone signal transduction)	PF04873.10(EIN3:Ethylene insensitive 3)		gi|731353857|ref|XP_010688276.1|( PREDICTED: ETHYLENE INSENSITIVE 3-like 3 protein [Beta vulgaris subsp. vulgaris])	gi|37078126|sp|O23116.1|EIL3_ARATH(RecName: Full=ETHYLENE INSENSITIVE 3-like 3 protein)
Brassinosteroid	BSK	miR172b	TRINITY_DN87253_c2_g1	3	1	21	1423	1442	GGAATCTTGATGATGCTGCAT	||||*||||||||||*|*|*|	CCTTCGAACTACTACCA-GCA		NOG04130(T:Signal transduction mechanisms )		NOG04130(serine threonine-protein kinase)	K14500		map04075(Plant hormone signal transduction)	PF07714.14(Pkinase_Tyr:Protein tyrosine kinase); PF00069.22(Pkinase:Protein kinase domain)	GO:0004672(molecular_function:protein kinase activity); GO:0006468(biological_process:protein phosphorylation); GO:0005524(molecular_function:ATP binding)	gi|902195403|gb|KNA12824.1|( hypothetical protein SOVF_122440 [Spinacia oleracea])	gi|75333858|sp|Q9FHD7.1|Y5126_ARATH(RecName: Full=Probable serine/threonine-protein kinase At5g41260)
		Nov-m0011-3p	TRINITY_DN87253_c2_g2	2.2	1	22	2029	2050	ACGTAAACAACATGATATATCG	||:|||||||*||:|||||||:	TGTATTTGTTTTATTATATAGT					K14500		map04075(Plant hormone signal transduction)	PF07714.14(Pkinase_Tyr:Protein tyrosine kinase); PF00069.22(Pkinase:Protein kinase domain)	GO:0004672(molecular_function:protein kinase activity); GO:0006468(biological_process:protein phosphorylation); GO:0005524(molecular_function:ATP binding)	gi|902195403|gb|KNA12824.1|( hypothetical protein SOVF_122440 [Spinacia oleracea])	gi|75333858|sp|Q9FHD7.1|Y5126_ARATH(RecName: Full=Probable serine/threonine-protein kinase At5g41260)
		Nov-m0132-3p	TRINITY_DN87253_c2_g2	2.2	1	22	2031	2052	AAACGTAAACAACATGATGTAT	||||:|||||||*||:||:|||	TTTGTATTTGTTTTATTATATA					K14500		map04075(Plant hormone signal transduction)	PF07714.14(Pkinase_Tyr:Protein tyrosine kinase); PF00069.22(Pkinase:Protein kinase domain)	GO:0004672(molecular_function:protein kinase activity); GO:0006468(biological_process:protein phosphorylation); GO:0005524(molecular_function:ATP binding)	gi|902195403|gb|KNA12824.1|( hypothetical protein SOVF_122440 [Spinacia oleracea])	gi|75333858|sp|Q9FHD7.1|Y5126_ARATH(RecName: Full=Probable serine/threonine-protein kinase At5g41260)
		miR396g-5p	TRINITY_DN90539_c2_g2	2.8	1	21	1459	1479	TTCCACGGCTTTCTTGAACTT	|||*|||||*||||||||*|:	AAGCTGCCGTAAGAACTTTAG		NOG04130(T:Signal transduction mechanisms )		NOG04130(serine threonine-protein kinase)	K14500		map04075(Plant hormone signal transduction)	PF07714.14(Pkinase_Tyr:Protein tyrosine kinase); PF00069.22(Pkinase:Protein kinase domain)	GO:0006468(biological_process:protein phosphorylation); GO:0004672(molecular_function:protein kinase activity); GO:0005524(molecular_function:ATP binding); GO:0009742(biological_process:brassinosteroid mediated signaling pathway); GO:0005886(cellular_component:plasma membrane)	gi|902227336|gb|KNA20646.1|( hypothetical protein SOVF_050430 isoform B [Spinacia oleracea])	gi|75331881|sp|Q944A7.1|Y4523_ARATH(RecName: Full=Probable serine/threonine-protein kinase At4g35230)
		miR319b-5p	TRINITY_DN90539_c2_g2	3	1	21	401	421	GAGCTTTCTTTAGTCCACTCA	*|||||||:|*|||*||||||	ATCGAAAGGATTCAAGTGAGT		NOG04130(T:Signal transduction mechanisms )		NOG04130(serine threonine-protein kinase)	K14500		map04075(Plant hormone signal transduction)	PF07714.14(Pkinase_Tyr:Protein tyrosine kinase); PF00069.22(Pkinase:Protein kinase domain)	GO:0006468(biological_process:protein phosphorylation); GO:0004672(molecular_function:protein kinase activity); GO:0005524(molecular_function:ATP binding); GO:0009742(biological_process:brassinosteroid mediated signaling pathway); GO:0005886(cellular_component:plasma membrane)	gi|902227336|gb|KNA20646.1|( hypothetical protein SOVF_050430 isoform B [Spinacia oleracea])	gi|75331881|sp|Q944A7.1|Y4523_ARATH(RecName: Full=Probable serine/threonine-protein kinase At4g35230)
		Nov-m0194-5p	TRINITY_DN90539_c2_g2	3	1	23	157	178	GAAAGGGAATGGGAAAATAAGCC	*||||:|||||:|||||*|||**	GTTTCTCTTACTCTTTT-TTCTC		NOG04130(T:Signal transduction mechanisms )		NOG04130(serine threonine-protein kinase)	K14500		map04075(Plant hormone signal transduction)	PF07714.14(Pkinase_Tyr:Protein tyrosine kinase); PF00069.22(Pkinase:Protein kinase domain)	GO:0006468(biological_process:protein phosphorylation); GO:0004672(molecular_function:protein kinase activity); GO:0005524(molecular_function:ATP binding); GO:0009742(biological_process:brassinosteroid mediated signaling pathway); GO:0005886(cellular_component:plasma membrane)	gi|902227336|gb|KNA20646.1|( hypothetical protein SOVF_050430 isoform B [Spinacia oleracea])	gi|75331881|sp|Q944A7.1|Y4523_ARATH(RecName: Full=Probable serine/threonine-protein kinase At4g35230)
		Nov-m0195-5p	TRINITY_DN90539_c2_g2	3	1	23	157	178	GAAAGGGAATGGGAAAATAAGCC	*||||:|||||:|||||*|||**	GTTTCTCTTACTCTTTT-TTCTC		NOG04130(T:Signal transduction mechanisms )		NOG04130(serine threonine-protein kinase)	K14500		map04075(Plant hormone signal transduction)	PF07714.14(Pkinase_Tyr:Protein tyrosine kinase); PF00069.22(Pkinase:Protein kinase domain)	GO:0006468(biological_process:protein phosphorylation); GO:0004672(molecular_function:protein kinase activity); GO:0005524(molecular_function:ATP binding); GO:0009742(biological_process:brassinosteroid mediated signaling pathway); GO:0005886(cellular_component:plasma membrane)	gi|902227336|gb|KNA20646.1|( hypothetical protein SOVF_050430 isoform B [Spinacia oleracea])	gi|75331881|sp|Q944A7.1|Y4523_ARATH(RecName: Full=Probable serine/threonine-protein kinase At4g35230)
		Nov-m0156-5p	TRINITY_DN91286_c1_g5	2.8	1	23	744	765	TTAAATTACATGTTTGGCAAATA	||*||||||||*|||||*|||:|	AAGTTAATGTAAAAACC-TTTGT					K14500		map04075(Plant hormone signal transduction)		GO:0004672(molecular_function:protein kinase activity); GO:0006468(biological_process:protein phosphorylation); GO:0005524(molecular_function:ATP binding)	gi|731382683|ref|XP_010646185.1|( PREDICTED: probable serine/threonine-protein kinase At4g35230 [Vitis vinifera])	gi|75331881|sp|Q944A7.1|Y4523_ARATH(RecName: Full=Probable serine/threonine-protein kinase At4g35230)
Jasmonic acid	COI-1	Nov-m0106-5p	TRINITY_DN88169_c2_g5	3	1	22	2379	2400	GGGAATATTGTTTTAATGGATG	:|||*||||:||:||||*:|||	TCCTCATAATAAGATTAGTTAC					K13463		map04075(Plant hormone signal transduction)	PF12937.4(F-box-like:F-box-like)		gi|870867390|gb|KMT18259.1|( hypothetical protein BVRB_2g024250 [Beta vulgaris subsp. vulgaris])	gi|59797640|sp|O04197.1|COI1_ARATH(RecName: Full=Coronatine-insensitive protein 1; AltName: Full=COI-1; AltName: Full=F-box/LRR-repeat protein 2; Short=AtCOI1; Short=AtFBL2)
		Nov-m0145-3p	TRINITY_DN88169_c2_g5	3	1	22	644	666	AGAACGCTTATTTAATTT-AACT	|||||:|||||::||:||*|||*	TCTTGTGAATAGGTTGAAGTTGC					K13463		map04075(Plant hormone signal transduction)	PF12937.4(F-box-like:F-box-like)		gi|870867390|gb|KMT18259.1|( hypothetical protein BVRB_2g024250 [Beta vulgaris subsp. vulgaris])	gi|59797640|sp|O04197.1|COI1_ARATH(RecName: Full=Coronatine-insensitive protein 1; AltName: Full=COI-1; AltName: Full=F-box/LRR-repeat protein 2; Short=AtCOI1; Short=AtFBL2)
		Nov-m0146-3p	TRINITY_DN88169_c2_g5	3	1	22	644	666	AGAACGCTTATTTAATTT-AACT	|||||:|||||::||:||*|||*	TCTTGTGAATAGGTTGAAGTTGC					K13463		map04075(Plant hormone signal transduction)	PF12937.4(F-box-like:F-box-like)		gi|870867390|gb|KMT18259.1|( hypothetical protein BVRB_2g024250 [Beta vulgaris subsp. vulgaris])	gi|59797640|sp|O04197.1|COI1_ARATH(RecName: Full=Coronatine-insensitive protein 1; AltName: Full=COI-1; AltName: Full=F-box/LRR-repeat protein 2; Short=AtCOI1; Short=AtFBL2)
	JAZ	Nov-m0106-5p	TRINITY_DN88944_c6_g1	3	1	22	651	672	GGGAATATTGTTTTAATGGATG	:|*||||||:*||||||:||||	TCATTATAATTAAATTATCTAC					K13464		map04075(Plant hormone signal transduction)	PF06200.11(tify:tify domain)		gi|291621305|dbj|BAI94490.1|( JAZ-like protein [Dianthus caryophyllus])	gi|75147844|sp|Q84R94.1|TI10A_ORYSJ(RecName: Full=Protein TIFY 10a; Short=OsTIFY10a; AltName: Full=Jasmonate ZIM domain-containing protein 6; Short=OsJAZ6; AltName: Full=OsJAZ5)
		Nov-m0156-5p	TRINITY_DN88944_c6_g1	3	1	23	218	240	TTAAATTACATGTTTGGCAAATA	*|||||||||*|||||:*|||*|	TATTTAATGTTCAAACTCTTTTT					K13464		map04075(Plant hormone signal transduction)	PF06200.11(tify:tify domain)		gi|291621305|dbj|BAI94490.1|( JAZ-like protein [Dianthus caryophyllus])	gi|75147844|sp|Q84R94.1|TI10A_ORYSJ(RecName: Full=Protein TIFY 10a; Short=OsTIFY10a; AltName: Full=Jasmonate ZIM domain-containing protein 6; Short=OsJAZ6; AltName: Full=OsJAZ5)
