# Supplementary material for: Integrated Analyses of miRNAome and Transcriptome Reveal The Function of miRNAs in Morphogenesis of Organs and Defense of Endophytes in Pseudostellaria Heterophylla
Source: Research Square preprint supplement (doi:10.21203/rs.3.rs-239755/v1), 2021-03-01
Supplement: Supplementary file 8 [file bf3a9dcff5499e0d93a535b8.xlsx]

## Sheet: upregulated miRNAs
miRNAs	target gene	score	query_start	query_end	target_start	target_end	query_seq	align	target_seq	nr
miR156a	TRINITY_DN84801_c0_g1	0.5	1	21	1790	1810	TGACAGAAGAGAGAGAGCACA	||||||||||||||||||||*	ACTGTCTTCTCTCTCTCGTGC	gi|731343152|ref|XP_010682751.1|( PREDICTED: squamosa promoter-binding-like protein 2 [Beta vulgaris subsp. vulgaris])
	TRINITY_DN84801_c0_g2	0.5	1	21	2299	2319	TGACAGAAGAGAGAGAGCACA	||||||||||||||||||||*	ACTGTCTTCTCTCTCTCGTGG	gi|731343152|ref|XP_010682751.1|( PREDICTED: squamosa promoter-binding-like protein 2 [Beta vulgaris subsp. vulgaris])
	TRINITY_DN90116_c0_g1	0.5	1	21	707	726	TGACAGAAGAGAGAGAGCACA	|||||||||||||||||||*|	ACTGTCTTCTCTCTCTCGT-T	gi|731329270|ref|XP_010675500.1|( PREDICTED: squamosa promoter-binding-like protein 4 [Beta vulgaris subsp. vulgaris])
	TRINITY_DN69898_c0_g1	1.5	1	21	409	429	TGACAGAAGAGAGAGAGCACA	|*||||||||:||||||||||	AATGTCTTCTTTCTCTCGTGT	gi|731324125|ref|XP_010672800.1|( PREDICTED: zinc finger MYM-type protein 1-like [Beta vulgaris subsp. vulgaris])
	TRINITY_DN88782_c0_g1	1.5	1	21	347	367	TGACAGAAGAGAGAGAGCACA	|||||:||||||||:|||*||	ACTGTTTTCTCTCTTTCGCGT	gi|902227025|gb|KNA20551.1|( hypothetical protein SOVF_051300 [Spinacia oleracea])
	TRINITY_DN85556_c3_g2	2	1	21	1000	1020	TGACAGAAGAGAGAGAGCACA	||||||||||*||||||*|*|	ACTGTCTTCTGTCTCTCTTAT	gi|902159213|gb|KNA06311.1|( hypothetical protein SOVF_182260 [Spinacia oleracea])
	TRINITY_DN87901_c0_g1	2	1	21	559	578	TGACAGAAGAGAGAGAGCACA	*:||||||:||||||||*|||	TTTGTCTTTTCTCTCTC-TGT	gi|731348270|ref|XP_010685410.1|( PREDICTED: nicalin-1 [Beta vulgaris subsp. vulgaris])
	TRINITY_DN88579_c0_g2	2	1	21	1722	1742	TGACAGAAGAGAGAGAGCACA	||||||||:|:|||||:||*|	ACTGTCTTTTTTCTCTTGTTT	gi|731350733|ref|XP_010686656.1|( PREDICTED: pentatricopeptide repeat-containing protein At5g64320, mitochondrial [Beta vulgaris subsp. vulgaris])
	TRINITY_DN90116_c2_g6	2	1	21	932	951	TGACAGAAGAGAGAGAGCACA	|||||||||||||*:||||*|	ACTGTCTTCTCTCGTTCGT-T	gi|731329270|ref|XP_010675500.1|( PREDICTED: squamosa promoter-binding-like protein 4 [Beta vulgaris subsp. vulgaris])
	TRINITY_DN90387_c1_g7	2	1	21	274	294	TGACAGAAGAGAGAGAGCACA	|||||*||||||||||:||*|	ACTGTATTCTCTCTCTTGTAT	gi|731331667|ref|XP_010676780.1|( PREDICTED: importin-11 isoform X1 [Beta vulgaris subsp. vulgaris])
miR159a	TRINITY_DN91612_c2_g3	1.5	1	21	2000	2020	TTTGGATTGAAGGGAGCTCTA	*|||||*||||||||||||||	TAACCTCACTTCCCTCGAGAT	gi|731326066|ref|XP_010673830.1|( PREDICTED: transcription factor GAMYB-like [Beta vulgaris subsp. vulgaris])
	TRINITY_DN89557_c1_g5	1.8	1	21	948	968	TTTGGATTGAAGGGAGCTCTA	*|||||*||||||||||||:|	TAACCTCACTTCCCTCGAGGT	gi|731326066|ref|XP_010673830.1|( PREDICTED: transcription factor GAMYB-like [Beta vulgaris subsp. vulgaris])
	TRINITY_DN89130_c0_g1	2	1	21	422	442	TTTGGATTGAAGGGAGCTCTA	||||||||||||:||:|**||	AAACCTAACTTCTCTTGTAAT	gi|731337198|ref|XP_010679659.1|( PREDICTED: putative glycosyltransferase 7 [Beta vulgaris subsp. vulgaris])
miR159c	TRINITY_DN89557_c1_g5	2	1	21	948	968	TTTGGATTGAAGGGAGCTCCT	*|||||*|||||||||||||*	TAACCTCACTTCCCTCGAGGT	gi|731326066|ref|XP_010673830.1|( PREDICTED: transcription factor GAMYB-like [Beta vulgaris subsp. vulgaris])
	TRINITY_DN91612_c2_g3	2	1	21	2001	2020	TTTGGATTGAAGGGAGCTCCT	*|||||*|||||||||||*||	TAACCTCACTTCCCTCGA-GA	gi|731326066|ref|XP_010673830.1|( PREDICTED: transcription factor GAMYB-like [Beta vulgaris subsp. vulgaris])
miR159d	TRINITY_DN89557_c1_g5	1.2	1	21	948	968	ATTGGATTGAAGGGAGCTCCG	||||||*|||||||||||||:	TAACCTCACTTCCCTCGAGGT	gi|731326066|ref|XP_010673830.1|( PREDICTED: transcription factor GAMYB-like [Beta vulgaris subsp. vulgaris])
	TRINITY_DN91612_c2_g3	1.8	1	21	2000	2020	ATTGGATTGAAGGGAGCTCCG	||||||*||||||||||||*:	TAACCTCACTTCCCTCGAGAT	gi|731326066|ref|XP_010673830.1|( PREDICTED: transcription factor GAMYB-like [Beta vulgaris subsp. vulgaris])
miR168a	TRINITY_DN91441_c0_g5	1.5	1	21	1138	1157	TTGCTTGGTGCTGGTCGGGAA	*|||||||||||||||:*|||	TACGAACCACGACCAGT-CTT	gi|731329625|ref|XP_010675694.1|( PREDICTED: polyadenylate-binding protein RBP45 [Beta vulgaris subsp. vulgaris])
	TRINITY_DN78784_c0_g1	2	1	21	1038	1057	TTGCTTGGTGCTGGTCGGGAA	||||||||||||||||***||	AACGAACCACGACCAG-AGTT	gi|545362400|ref|XP_005646434.1|( MC family transporter [Coccomyxa subellipsoidea C-169])
miR171c-5p	TRINITY_DN87936_c1_g5	1.2	1	21	1336	1356	GGATATTGGTGCGGTTCAATC	:||||||||:||||:||||||	TCTATAACCGCGCCGAGTTAG	gi|902231903|gb|KNA22439.1|( hypothetical protein SOVF_034090 isoform A [Spinacia oleracea])
	TRINITY_DN87936_c1_g8	1.2	1	21	1775	1795	GGATATTGGTGCGGTTCAATC	:||||||||:||||:||||||	TCTATAACCGCGCCGAGTTAG	gi|902231903|gb|KNA22439.1|( hypothetical protein SOVF_034090 isoform A [Spinacia oleracea])
miR172b	TRINITY_DN92408_c1_g1	1.2	1	21	3664	3684	GGAATCTTGATGATGCTGCAT	:|||||:|||||||||||||*	TCTTAGGACTACTACGACGTC	gi|944049345|gb|KQJ84986.1|( hypothetical protein BRADI_5g24100 [Brachypodium distachyon])
	TRINITY_DN84843_c0_g1	2	1	21	835	855	GGAATCTTGATGATGCTGCAT	*|||||*||||||||||:||:	ACTTAGTACTACTACGATGTG	gi|902228005|gb|KNA20920.1|( hypothetical protein SOVF_047860 [Spinacia oleracea])
	TRINITY_DN87096_c0_g5	2	1	21	1233	1252	GGAATCTTGATGATGCTGCAT	|:|||||||*|||||||||*|	CTTTAGAACAACTACGACG-A	gi|731318849|ref|XP_010669943.1|( PREDICTED: protein RRP45A-like isoform X1 [Beta vulgaris subsp. vulgaris])
miR395c	TRINITY_DN83966_c0_g1	2	1	21	1045	1065	CTGAAGTGTTTGGGGGGACTC	*||||||||||||:||:|*||	AACTTCACAAACCTCCTTTAG	gi|731349064|ref|XP_010685806.1|( PREDICTED: uncharacterized protein LOC104900148 [Beta vulgaris subsp. vulgaris])
	TRINITY_DN85475_c0_g1	2	1	21	766	785	CTGAAGTGTTTGGGGGGACTC	||:|||:||||||:||||*||	GATTTCGCAAACCTCCCT-AG	gi|902224234|gb|KNA19733.1|( hypothetical protein SOVF_058790 [Spinacia oleracea])
miR395h	TRINITY_DN83966_c0_g1	1.8	1	21	1045	1065	ATGAAGTGTTTGGGGGAACTT	*||||||||||||:||||*|:	AACTTCACAAACCTCCTTTAG	gi|731349064|ref|XP_010685806.1|( PREDICTED: uncharacterized protein LOC104900148 [Beta vulgaris subsp. vulgaris])
	TRINITY_DN93074_c2_g1	1.5	1	21	970	989	ATGAAGTGTTTGGGGGAACTT	|||||||||||||||:|**||	TACTTCACAAACCCCTT-AAA	gi|731311481|ref|XP_010669728.1|( PREDICTED: reticulon-like protein B4 [Beta vulgaris subsp. vulgaris])
	TRINITY_DN86069_c0_g1	2	1	21	2193	2213	ATGAAGTGTTTGGGGGAACTT	*|||||||||||::|||||*|	GACTTCACAAACTTCCTTGCA	gi|902235438|gb|KNA23908.1|( hypothetical protein SOVF_019520 [Spinacia oleracea])
	TRINITY_DN92216_c2_g7	2	1	21	83	103	ATGAAGTGTTTGGGGGAACTT	|||||:|:||||||||||*|*	TACTTTATAAACCCCCTTTAC	gi|731326159|ref|XP_010673879.1|( PREDICTED: probable E3 ubiquitin-protein ligase ARI8 isoform X1 [Beta vulgaris subsp. vulgaris])
miR395k	TRINITY_DN83966_c0_g1	1.5	1	21	1045	1065	GTGAAGTGTTTGGGGGAACTC	*||||||||||||:||||*||	AACTTCACAAACCTCCTTTAG	gi|731349064|ref|XP_010685806.1|( PREDICTED: uncharacterized protein LOC104900148 [Beta vulgaris subsp. vulgaris])
miR396a-3p	TRINITY_DN86509_c3_g2	1.5	1	21	58	78	GTTCAATAAAGCTGTGGGAAG	||||||*||||||||||:||:	CAAGTTCTTTCGACACCTTTT	gi|694404587|ref|XP_009377167.1|( PREDICTED: serine/threonine-protein phosphatase 7 long form homolog [Pyrus x bretschneideri])
	TRINITY_DN70579_c0_g2	2	1	21	420	440	GTTCAATAAAGCTGTGGGAAG	||||||||||||*||||*||*	CAAGTTATTTCGTCACCGTTG	gi|159465309|ref|XP_001690865.1|( vacuolar transport chaperone-like protein [Chlamydomonas reinhardtii])
miR396b-3p	TRINITY_DN86509_c3_g2	1.2	1	21	58	78	GCTCAAGAAAGCTGTGGGAAA	|*|||||||||||||||:|||	CAAGTTCTTTCGACACCTTTT	gi|694404587|ref|XP_009377167.1|( PREDICTED: serine/threonine-protein phosphatase 7 long form homolog [Pyrus x bretschneideri])

## Sheet: downregulated miRNAs
miRNA	target gene	score	query_start	query_end	target_start	target_end	query_seq	align	target_seq	nr
miR164f	TRINITY_DN89225_c3_g8	1	1	21	266	286	TGGAGAAGCAGGGCACATGCT	||||||||||||||||*||||	ACCTCTTCGTCCCGTGAACGA	gi|870843012|gb|KMS96284.1|( hypothetical protein BVRB_000470 isoform B [Beta vulgaris subsp. vulgaris])
miR171d	TRINITY_DN92867_c1_g1	1.5	1	21	642	662	AGATTGAGCCGCGCCAATATC	*||||||||||*|||||||||	ACTAACTCGGCACGGTTATAG	gi|902231904|gb|KNA22440.1|( hypothetical protein SOVF_034090 isoform B [Spinacia oleracea])
miR319a	TRINITY_DN90304_c1_g3	1.8	1	21	1479	1499	TTGGACTGAAGGGAGCTCCCT	|||||||||||||*:|||||:	AACCTGACTTCCCATGAGGGG	gi|731356574|ref|XP_010689747.1|( PREDICTED: transcription factor TCP4-like [Beta vulgaris subsp. vulgaris])
	TRINITY_DN85902_c0_g1	2	1	21	3250	3269	TTGGACTGAAGGGAGCTCCCT	*|||||||||||*||||*|||	TACCTGACTTCCATCGA-GGA	gi|552822717|ref|XP_005846189.1|( hypothetical protein CHLNCDRAFT_6829, partial [Chlorella variabilis])
miR319a-3p.2-3p	TRINITY_DN90304_c1_g3	0.5	1	20	1480	1499	TTGGACTGAAGGGTGCTCCC	||||||||||||||:|||||	AACCTGACTTCCCATGAGGG	gi|731356574|ref|XP_010689747.1|( PREDICTED: transcription factor TCP4-like [Beta vulgaris subsp. vulgaris])
	TRINITY_DN89893_c1_g2	1.2	1	20	1390	1409	TTGGACTGAAGGGTGCTCCC	:|||||||||||||:||||*	GACCTGACTTCCCATGAGGA	gi|731356574|ref|XP_010689747.1|( PREDICTED: transcription factor TCP4-like [Beta vulgaris subsp. vulgaris])
	TRINITY_DN89893_c1_g1	1.5	1	20	897	916	TTGGACTGAAGGGTGCTCCC	||||||||||||||:|:||*	AACCTGACTTCCCATGGGGA	gi|731356574|ref|XP_010689747.1|( PREDICTED: transcription factor TCP4-like [Beta vulgaris subsp. vulgaris])
miR319b-5p	TRINITY_DN83149_c0_g1	1.2	1	21	1010	1029	GAGCTTTCTTTAGTCCACTCA	:|||:||||||||||||*|||	TTCGGAAGAAATCAGGT-AGT	gi|902206737|gb|KNA15555.1|( hypothetical protein SOVF_097080 [Spinacia oleracea])
miR319i	TRINITY_DN86101_c1_g3	2	1	20	991	1010	TTGGGCTGAAGGGAGCTCCC	|||||||||||||*|||**|	AACCCGACTTCCCCCGATAG	gi|731361535|ref|XP_010692406.1|( PREDICTED: long chain acyl-CoA synthetase 9, chloroplastic [Beta vulgaris subsp. vulgaris])
	TRINITY_DN89557_c1_g5	2	1	20	948	967	TTGGGCTGAAGGGAGCTCCC	||||:*|||||||||||||*	AACCTCACTTCCCTCGAGGT	gi|731326066|ref|XP_010673830.1|( PREDICTED: transcription factor GAMYB-like [Beta vulgaris subsp. vulgaris])
	TRINITY_DN90304_c1_g3	2	1	20	1480	1499	TTGGGCTGAAGGGAGCTCCC	||||:||||||||*:|||||	AACCTGACTTCCCATGAGGG	gi|731356574|ref|XP_010689747.1|( PREDICTED: transcription factor TCP4-like [Beta vulgaris subsp. vulgaris])
miR390b	TRINITY_DN87831_c0_g6	2	1	21	466	485	AAGCTCAGGAGGGATAGCGCC	||||||||:||||||||**|*	TTCGAGTCTTCCCTATC-AGT	gi|731352756|ref|XP_010687703.1|( PREDICTED: probable E3 ubiquitin-protein ligase XBOS32 [Beta vulgaris subsp. vulgaris])
miR394a-5p	TRINITY_DN120412_c0_g1	1.5	1	20	1606	1625	TTGGCATTCTGTCCACCTCC	|||:|*||||||||||||||	AACTGGAAGACAGGTGGAGG	gi|747105971|ref|XP_011101264.1|( PREDICTED: fimbrin-5-like [Sesamum indicum])
