# Supplementary material for: Integrated Analyses of miRNAome and Transcriptome Reveal The Function of miRNAs in Morphogenesis of Organs and Defense of Endophytes in Pseudostellaria Heterophylla
Source: Research Square preprint supplement (doi:10.21203/rs.3.rs-239755/v1), 2021-03-01
Supplement: Supplementary file 9 [file c3fc97e4ae47b82e045ddc6f.xlsx]

## Sheet: Sheet1
Gene id	Gene name	query	Count	score	query_start	query_end	target_start	target_end	query_seq	align	target_seq
TRINITY_DN90017_c1_g1	ubiquitin-conjugating enzyme E2 24	Nov-m0051-5p	16	2.2	1	21	2181	2201	GGGCAGTTCTTCTTTGGCAGA	|||||:*|||:||||||||:|	CCCGTTTAGAGGAAACCGTTT
		Nov-m0052-5p		2.2	1	21	2181	2201	GGGCAGTTCTTCTTTGGCAGA	|||||:*|||:||||||||:|	CCCGTTTAGAGGAAACCGTTT
		Nov-m0051-5p		2.5	1	21	2530	2550	GGGCAGTTCTTCTTTGGCAGA	|||||:*|||:||||||||*|	CCCGTTTAGAGGAAACCGTGT
		Nov-m0051-5p		2.5	1	21	2220	2239	GGGCAGTTCTTCTTTGGCAGA	|||||:*|||:||||||||*|	CCCGTTTAGAGGAAACCGT-T
		Nov-m0051-5p		2.5	1	21	2144	2163	GGGCAGTTCTTCTTTGGCAGA	|||||:*|||:||||||||*|	CCCGTTTAGAGGAAACCGT-T
		Nov-m0051-5p		2.5	1	21	2106	2125	GGGCAGTTCTTCTTTGGCAGA	|||||:*|||:||||||||*|	CCCGTTTAGAGGAAACCGT-T
		Nov-m0051-5p		2.5	1	21	2068	2087	GGGCAGTTCTTCTTTGGCAGA	|||||:*|||:||||||||*|	CCCGTTTAGAGGAAACCGT-T
		Nov-m0052-5p		2.5	1	21	2530	2550	GGGCAGTTCTTCTTTGGCAGA	|||||:*|||:||||||||*|	CCCGTTTAGAGGAAACCGTGT
		Nov-m0052-5p		2.5	1	21	2220	2239	GGGCAGTTCTTCTTTGGCAGA	|||||:*|||:||||||||*|	CCCGTTTAGAGGAAACCGT-T
		Nov-m0052-5p		2.5	1	21	2144	2163	GGGCAGTTCTTCTTTGGCAGA	|||||:*|||:||||||||*|	CCCGTTTAGAGGAAACCGT-T
		Nov-m0052-5p		2.5	1	21	2106	2125	GGGCAGTTCTTCTTTGGCAGA	|||||:*|||:||||||||*|	CCCGTTTAGAGGAAACCGT-T
		Nov-m0052-5p		2.5	1	21	2068	2087	GGGCAGTTCTTCTTTGGCAGA	|||||:*|||:||||||||*|	CCCGTTTAGAGGAAACCGT-T
		Nov-m0051-5p		3	1	21	2403	2423	GGGCAGTTCTTCTTTGGCAGA	||||*|*|||:|||||||||*	CCCGCCTAGAGGAAACCGTCG
		Nov-m0051-5p		3	1	21	2284	2304	GGGCAGTTCTTCTTTGGCAGA	|||||:*|||:||||||||**	CCCGTTTAGAGGAAACCGTAA
		Nov-m0052-5p		3	1	21	2403	2423	GGGCAGTTCTTCTTTGGCAGA	||||*|*|||:|||||||||*	CCCGCCTAGAGGAAACCGTCG
		Nov-m0052-5p		3	1	21	2284	2304	GGGCAGTTCTTCTTTGGCAGA	|||||:*|||:||||||||**	CCCGTTTAGAGGAAACCGTAA
TRINITY_DN86988_c0_g5	Transmembrane protein 97	miR399h	11	1.2	1	21	1864	1884	TGCCAAAGGAGACTTGCCCAG	:|||||||:||||||||||*|	GCGGTTTCTTCTGAACGGGAC
		miR399p		1.8	1	21	1864	1884	TGCCAAAGGAGAGTTGCCCTG	:|||||||:|||*||||||||	GCGGTTTCTTCTGAACGGGAC
		miR399b		1.8	1	21	1864	1884	TGCCAAAGGAGATTTGCCCGG	:|||||||:|||:||||||*|	GCGGTTTCTTCTGAACGGGAC
		miR399a		1.8	1	21	1864	1884	TGCCAAAGGAGAATTGCCCTG	:|||||||:|||*||||||||	GCGGTTTCTTCTGAACGGGAC
		miR399e		2	1	21	1863	1884	CGCCAAAGGAGAGTTGCCCT-C	||||||||:|||*|||||||*|	GCGGTTTCTTCTGAACGGGACG
		miR399k		2.8	1	21	1864	1884	TGCCAAAGGAAATTTGCCCCG	:|||||||:|*|:||||||*|	GCGGTTTCTTCTGAACGGGAC
		Nov-m0052-3p		0	1	21	1864	1884	CGCCAAAGAAGACTTGCCCTG	|||||||||||||||||||||	GCGGTTTCTTCTGAACGGGAC
		Nov-m0051-3p		0	1	21	1864	1884	CGCCAAAGAAGACTTGCCCTG	|||||||||||||||||||||	GCGGTTTCTTCTGAACGGGAC
		Nov-m0051-5p		0.5	1	21	1917	1937	GGGCAGTTCTTCTTTGGCAGA	||:||||||||||||||||||	CCTGTCAAGAAGAAACCGTCT
		Nov-m0052-5p		0.5	1	21	1917	1937	GGGCAGTTCTTCTTTGGCAGA	||:||||||||||||||||||	CCTGTCAAGAAGAAACCGTCT
		Nov-m0220-5p		2.8	1	24	1146	1169	AAGGCACTGGGATAATGTTGTTGT	*|||||*||||*||||||||||:|	CTCCGTAACCCCATTACAACAATA
TRINITY_DN91558_c0_g5	Homeobox-leucine zipper protein ATHB-8	miR166k	10	0.5	1	21	1441	1461	TCCGGACCAGGCTTCATTCCC	||||||||||||||||||||*	AGGCCTGGTCCGAAGTAAGGT
		miR166n		1.2	1	21	1440	1460	TCGGACCAGGCTTCATTCCTT	:||||||||||||||||||**	GGCCTGGTCCGAAGTAAGGTC
		miR166a-3p		1.2	1	21	1440	1460	TCGGACCAGGCTTCATTCCCC	:||||||||||||||||||**	GGCCTGGTCCGAAGTAAGGTC
		miR166i-3p		1.8	1	21	1440	1460	TCGGATCAGGCTTCATTCCTC	:||||:|||||||||||||**	GGCCTGGTCCGAAGTAAGGTC
		miR165a-3p		2.2	1	21	1440	1460	TCGGACCAGGCTTCATCCCCC	:|||||||||||||||*||**	GGCCTGGTCCGAAGTAAGGTC
		miR166e-3p		2.2	1	21	1440	1460	TCGAACCAGGCTTCATTCCCC	:||*|||||||||||||||**	GGCCTGGTCCGAAGTAAGGTC
		miR166k-3p		2.2	1	21	1440	1460	TCGGACCAGGCTTCAATCCCT	:||||||||||||||*|||**	GGCCTGGTCCGAAGTAAGGTC
		Nov-m0126-5p		3	1	22	840	860	ATTTTCGATATCTCTGAGATAT	|*||||||*||||||||:||*:	TTAAAGCTTTAGAGACTTTA-G
		Nov-m0140-3p		2	1	23	1436	1458	GGACCAGGCTTCATTCCCCCCAA	|||||||||||||||||***||*	CCTGGTCCGAAGTAAGGTCCGTA
		Nov-m0141-3p		2	1	23	1436	1458	GGACCAGGCTTCATTCCCCCCAA	|||||||||||||||||***||*	CCTGGTCCGAAGTAAGGTCCGTA
TRINITY_DN91558_c0_g3	Homeobox-leucine zipper protein ATHB-15	miR166k	9	0.5	1	21	1238	1258	TCCGGACCAGGCTTCATTCCC	||||||||||||||||||||*	AGGCCTGGTCCGAAGTAAGGT
		miR166n		1.2	1	21	1237	1257	TCGGACCAGGCTTCATTCCTT	:||||||||||||||||||**	GGCCTGGTCCGAAGTAAGGTC
		miR166a-3p		1.2	1	21	1237	1257	TCGGACCAGGCTTCATTCCCC	:||||||||||||||||||**	GGCCTGGTCCGAAGTAAGGTC
		miR166i-3p		1.8	1	21	1237	1257	TCGGATCAGGCTTCATTCCTC	:||||:|||||||||||||**	GGCCTGGTCCGAAGTAAGGTC
		miR165a-3p		2.2	1	21	1237	1257	TCGGACCAGGCTTCATCCCCC	:|||||||||||||||*||**	GGCCTGGTCCGAAGTAAGGTC
		miR166e-3p		2.2	1	21	1237	1257	TCGAACCAGGCTTCATTCCCC	:||*|||||||||||||||**	GGCCTGGTCCGAAGTAAGGTC
		miR166k-3p		2.2	1	21	1237	1257	TCGGACCAGGCTTCAATCCCT	:||||||||||||||*|||**	GGCCTGGTCCGAAGTAAGGTC
		Nov-m0140-3p		2	1	23	1233	1255	GGACCAGGCTTCATTCCCCCCAA	|||||||||||||||||***||*	CCTGGTCCGAAGTAAGGTCCGTA
		Nov-m0141-3p		2	1	23	1233	1255	GGACCAGGCTTCATTCCCCCCAA	|||||||||||||||||***||*	CCTGGTCCGAAGTAAGGTCCGTA
TRINITY_DN91558_c0_g7	Homeobox-leucine zipper protein REVOLUTA	miR166k	9	0.5	1	21	1117	1136	TCCGGACCAGGCTTCATTCCC	|||||||||||||||||*|||	AGGCCTGGTCCGAAGTA-GGG
		miR165a-3p		1.2	1	21	1115	1135	TCGGACCAGGCTTCATCCCCC	:||||||||||||||||||**	GGCCTGGTCCGAAGTAGGGTC
		miR166n		1.8	1	21	1115	1135	TCGGACCAGGCTTCATTCCTT	:|||||||||||||||:||**	GGCCTGGTCCGAAGTAGGGTC
		miR166a-3p		1.8	1	21	1115	1135	TCGGACCAGGCTTCATTCCCC	:|||||||||||||||:||**	GGCCTGGTCCGAAGTAGGGTC
		miR166i-3p		2.2	1	21	1115	1135	TCGGATCAGGCTTCATTCCTC	:||||:||||||||||:||**	GGCCTGGTCCGAAGTAGGGTC
		miR166e-3p		2.8	1	21	1115	1135	TCGAACCAGGCTTCATTCCCC	:||*||||||||||||:||**	GGCCTGGTCCGAAGTAGGGTC
		miR166k-3p		2.8	1	21	1115	1135	TCGGACCAGGCTTCAATCCCT	:||||||||||||||*:||**	GGCCTGGTCCGAAGTAGGGTC
		Nov-m0140-3p		2.5	1	23	1111	1133	GGACCAGGCTTCATTCCCCCCAA	||||||||||||||:||***||*	CCTGGTCCGAAGTAGGGTCCGTA
		Nov-m0141-3p		2.5	1	23	1111	1133	GGACCAGGCTTCATTCCCCCCAA	||||||||||||||:||***||*	CCTGGTCCGAAGTAGGGTCCGTA
TRINITY_DN91558_c0_g8	Homeobox-leucine zipper protein ATHB-8	miR166k	9	0.5	1	21	714	734	TCCGGACCAGGCTTCATTCCC	||||||||||||||||||||*	AGGCCTGGTCCGAAGTAAGGT
		miR166n		1.2	1	21	713	733	TCGGACCAGGCTTCATTCCTT	:||||||||||||||||||**	GGCCTGGTCCGAAGTAAGGTC
		miR166a-3p		1.2	1	21	713	733	TCGGACCAGGCTTCATTCCCC	:||||||||||||||||||**	GGCCTGGTCCGAAGTAAGGTC
		miR166i-3p		1.8	1	21	713	733	TCGGATCAGGCTTCATTCCTC	:||||:|||||||||||||**	GGCCTGGTCCGAAGTAAGGTC
		miR165a-3p		2.2	1	21	713	733	TCGGACCAGGCTTCATCCCCC	:|||||||||||||||*||**	GGCCTGGTCCGAAGTAAGGTC
		miR166e-3p		2.2	1	21	713	733	TCGAACCAGGCTTCATTCCCC	:||*|||||||||||||||**	GGCCTGGTCCGAAGTAAGGTC
		miR166k-3p		2.2	1	21	713	733	TCGGACCAGGCTTCAATCCCT	:||||||||||||||*|||**	GGCCTGGTCCGAAGTAAGGTC
		Nov-m0140-3p		2	1	23	709	731	GGACCAGGCTTCATTCCCCCCAA	|||||||||||||||||***||*	CCTGGTCCGAAGTAAGGTCCGTA
		Nov-m0141-3p		2	1	23	709	731	GGACCAGGCTTCATTCCCCCCAA	|||||||||||||||||***||*	CCTGGTCCGAAGTAAGGTCCGTA
TRINITY_DN90101_c3_g6	Multicopper oxidase LPR2	Nov-m0069-3p	8	0.8	1	23	900	922	AAACAACCTGATGTATCGGAGGG	|||||||||||||||||:|||::	TTTGTTGGACTACATAGTCTCTT
		Nov-m0107-3p		1	1	24	909	932	AATTAAACGTAAACAATCTGATGT	|||:||||||||||||:|||||||	TTAGTTTGCATTTGTTGGACTACA
		Nov-m0108-3p		1	1	24	909	932	AATTAAACGTAAACAATCTGATGT	|||:||||||||||||:|||||||	TTAGTTTGCATTTGTTGGACTACA
		Nov-m0082-3p		1	1	22	906	927	AACGTGAACAATCTGATGTATC	|||||:|||||:||||||||||	TTGCATTTGTTGGACTACATAG
		Nov-m0132-3p		1	1	22	907	928	AAACGTAAACAACATGATGTAT	|||||||||||||*||||||||	TTTGCATTTGTTGGACTACATA
		Nov-m0011-3p		2.2	1	22	905	926	ACGTAAACAACATGATATATCG	|||||||||||*||||*||||:	TGCATTTGTTGGACTACATAGT
		Nov-m0172-3p		2.8	1	23	182	204	AATGAGAGGTAAACAAATGAATG	||||||||:*|||||||*:||*|	TTACTCTCTTTTTGTTTTTTTTC
		Nov-m0199-5p		3	1	23	648	670	GGAAATACTCATGATCAACACCA	|||*||||||||||:*|||*|||	CCTATATGAGTACTGATTGGGGT
TRINITY_DN87286_c4_g1	Polyadenylation and cleavage factor homolog 4	miR156e	8	3	1	21	136	155	TTGACAGAAGATAGAGAGCAC	|||||||*|||||:|:|*|*|	AACTGTCCTCTATTTTT-GGG
		Nov-m0069-3p		1.5	1	23	3445	3467	AAACAACCTGATGTATCGGAGGG	|||||||*|||||||||||||::	TTTGTTGAACTACATAGCCTCTT
		Nov-m0132-3p		1.5	1	22	3452	3473	AAACGTAAACAACATGATGTAT	||||:||||||||*||||||||	TTTGTATTTGTTGAACTACATA
		Nov-m0011-3p		2.5	1	22	3450	3471	ACGTAAACAACATGATATATCG	||:||||||||*||||*|||||	TGTATTTGTTGAACTACATAGC
		Nov-m0082-3p		2.5	1	22	3451	3472	AACGTGAACAATCTGATGTATC	|||:|:|||||:*|||||||||	TTGTATTTGTTGAACTACATAG
		Nov-m0107-3p		3	1	24	3454	3477	AATTAAACGTAAACAATCTGATGT	||*:||||:|||||||:*||||||	TTCGTTTGTATTTGTTGAACTACA
		Nov-m0185-3p		3	1	22	869	889	ATGAGACAAAAACCATGAATTG	||:|*||||||||||*|||*||	TATTGTGTTTTTGGTCCTT-AC
		Nov-m0108-3p		3	1	24	3454	3477	AATTAAACGTAAACAATCTGATGT	||*:||||:|||||||:*||||||	TTCGTTTGTATTTGTTGAACTACA
TRINITY_DN92548_c7_g1	L-ascorbate oxidase homolog	Nov-m0069-3p	7	1	1	23	5536	5558	AAACAACCTGATGTATCGGAGGG	|||||||*|||||||||||||||	TTTGTTGAACTACATAGCCTCCC
		Nov-m0132-3p		1	1	22	5543	5564	AAACGTAAACAACATGATGTAT	|||||||||||||*||||||||	TTTGCATTTGTTGAACTACATA
		Nov-m0011-3p		2	1	22	5541	5562	ACGTAAACAACATGATATATCG	|||||||||||*||||*|||||	TGCATTTGTTGAACTACATAGC
		Nov-m0082-3p		2	1	22	5542	5563	AACGTGAACAATCTGATGTATC	|||||:|||||:*|||||||||	TTGCATTTGTTGAACTACATAG
		Nov-m0106-5p		2.8	1	22	188	208	GGGAATATTGTTTTAATGGATG	:|:||||||:|||*||||||*|	TCTTTATAATAAATTTACCT-C
		Nov-m0107-3p		3	1	24	7656	7680	AATTAAACGTAAACAATCT-GATGT	||||||||:*|||||||*|*:||:|	TTAATTTGTTTTTGTTAAATTTATA
		Nov-m0108-3p		3	1	24	7656	7680	AATTAAACGTAAACAATCT-GATGT	||||||||:*|||||||*|*:||:|	TTAATTTGTTTTTGTTAAATTTATA
TRINITY_DN90150_c1_g2	Ribosomal RNA-processing protein 7 homolog A	Nov-m0069-3p	7	1.2	1	23	2132	2154	AAACAACCTGATGTATCGGAGGG	|||||||||:||:|||||||||:	TTTGTTGGATTATATAGCCTCCT
		Nov-m0011-3p		1.5	1	22	2137	2158	ACGTAAACAACATGATATATCG	|||||||||||*|:||||||||	TGCATTTGTTGGATTATATAGC
		Nov-m0220-5p		1.5	1	24	1518	1541	AAGGCACTGGGATAATGTTGTTGT	||||||||:||*||||||||||||	TTCCGTGATCCCATTACAACAACA
		Nov-m0082-3p		1.8	1	22	2138	2159	AACGTGAACAATCTGATGTATC	|||||:|||||:||:||:||||	TTGCATTTGTTGGATTATATAG
		Nov-m0132-3p		1.8	1	22	2139	2160	AAACGTAAACAACATGATGTAT	|||||||||||||*|:||:|||	TTTGCATTTGTTGGATTATATA
		Nov-m0107-3p		3	1	24	2141	2164	AATTAAACGTAAACAATCTGATGT	||**||||||||||||:||:||:|	TTTTTTTGCATTTGTTGGATTATA
		Nov-m0108-3p		3	1	24	2141	2164	AATTAAACGTAAACAATCTGATGT	||**||||||||||||:||:||:|	TTTTTTTGCATTTGTTGGATTATA
TRINITY_DN89893_c1_g1	Transcription factor TCP4	miR319a-3p.2-3p	7	1.5	1	20	897	916	TTGGACTGAAGGGTGCTCCC	||||||||||||||:|:||*	AACCTGACTTCCCATGGGGA
		miR319a		2.5	1	21	896	916	TTGGACTGAAGGGAGCTCCCT	|||||||||||||*:|:||*|	AACCTGACTTCCCATGGGGAA
		miR159d		2.8	1	21	897	917	ATTGGATTGAAGGGAGCTCCG	||||||:|||||||*:|:||*	TAACCTGACTTCCCATGGGGA
		miR159c		2.8	1	21	897	917	TTTGGATTGAAGGGAGCTCCT	*|||||:|||||||*:|:|||	TAACCTGACTTCCCATGGGGA
		miR319i		3	1	20	897	916	TTGGGCTGAAGGGAGCTCCC	||||:||||||||*:|:||*	AACCTGACTTCCCATGGGGA
		Nov-m0132-3p		2.8	1	22	1434	1455	AAACGTAAACAACATGATGTAT	||||**|||||||||||*:|||	TTTGATTTTGTTGTACTTTATA
		Nov-m0281-5p		3	1	22	1284	1305	ATTCAGTCTAAAAGAACATGGT	*||**||||||||:||||||||	AAATACAGATTTTTTTGTACCA
TRINITY_DN87378_c4_g1	Pyrrolidone-carboxylate peptidase	Nov-m0011-3p	7	0.5	1	22	1344	1365	ACGTAAACAACATGATATATCG	|||||||||||||:||||||||	TGCATTTGTTGTATTATATAGC
		Nov-m0132-3p		0.8	1	22	1346	1367	AAACGTAAACAACATGATGTAT	|||||||||||||||:||:|||	TTTGCATTTGTTGTATTATATA
		Nov-m0144-3p		2.8	1	24	769	792	AGTGTGAAACCGTCTCTTAGAAGA	*||||:||||||||||*||:|*||	ACACATTTTGGCAGAGTATTTGCT
		Nov-m0082-3p		2.8	1	22	1345	1366	AACGTGAACAATCTGATGTATC	|||||:|||||:*|:||:||||	TTGCATTTGTTGTATTATATAG
		Nov-m0173-5p		3	1	23	669	691	TCGAACTCCTGACCACTTGGTTA	||||||:|||||||*|**|||||	AGCTTGGGGACTGGAGTCCCAAT
		Nov-m0069-3p		3	1	23	1339	1361	AAACAACCTGATGTATCGGAGGG	|||||||*|:||:|||||*|*||	TTTGTTGTATTATATAGCGTACC
		Nov-m0011-3p		3	1	22	303	325	ACGTAAACAACATGATAT-ATCG	|||||||||||*|||:||*|**|	TGCATTTGTTGGACTGTACTCCC
TRINITY_DN93285_c2_g1	LRR receptor-like serine/threonine-protein kinase At3g47570	Nov-m0011-3p	6	3	1	22	895	916	ACGTAAACAACATGATATATCG	|||||||||||*|*||*|||||	TGCATTTGTTGGAATACATAGC
		Nov-m0069-3p		2.2	1	23	889	912	AAACAACCTGATGTATCGG-AGGG	|||||||||*|||||||||*||*:	TTTGTTGGAATACATAGCCATCAT
		Nov-m0082-3p		2	1	22	896	917	AACGTGAACAATCTGATGTATC	|||||:|||||:||*|||||||	TTGCATTTGTTGGAATACATAG
		Nov-m0107-3p		2	1	24	899	922	AATTAAACGTAAACAATCTGATGT	||*|||||||||||||:||*||||	TTCATTTGCATTTGTTGGAATACA
		Nov-m0108-3p		2	1	24	899	922	AATTAAACGTAAACAATCTGATGT	||*|||||||||||||:||*||||	TTCATTTGCATTTGTTGGAATACA
		Nov-m0132-3p		2	1	22	897	918	AAACGTAAACAACATGATGTAT	|||||||||||||*|*||||||	TTTGCATTTGTTGGAATACATA
TRINITY_DN92686_c0_g1	Monothiol glutaredoxin-S6	Nov-m0132-3p	6	1	1	22	1059	1080	AAACGTAAACAACATGATGTAT	|||||||||||||*||||||||	TTTGCATTTGTTGGACTACATA
		Nov-m0082-3p		1.5	1	22	1058	1079	AACGTGAACAATCTGATGTATC	|||||:|||||:|||||||||*	TTGCATTTGTTGGACTACATAC
		Nov-m0107-3p		2.5	1	24	1061	1084	AATTAAACGTAAACAATCTGATGT	||**||||||||||||:|||||||	TTTTTTTGCATTTGTTGGACTACA
		Nov-m0069-3p		2.5	1	23	1052	1074	AAACAACCTGATGTATCGGAGGG	||||||||||||||||**||*|*	TTTGTTGGACTACATACACTACA
		Nov-m0108-3p		2.5	1	24	1061	1084	AATTAAACGTAAACAATCTGATGT	||**||||||||||||:|||||||	TTTTTTTGCATTTGTTGGACTACA
		Nov-m0011-3p		2.5	1	22	1058	1078	ACGTAAACAACATGATATATCG	|||||||||||*||||*|||*|	TGCATTTGTTGGACTACATA-C
TRINITY_DN92116_c1_g7	REF/SRPP-like protein At1g67360	Nov-m0270-3p	6	1.8	1	21	1600	1620	AAAATTCCAGTCGATCGACTC	**|||||||||||||||||:|	CCTTAAGGTCAGCTAGCTGGG
		Nov-m0271-5p		1.8	1	20	1601	1620	GGAATTTGAGTCGATCGACT	||||||:*|||||||||||:	CCTTAAGGTCAGCTAGCTGG
		Nov-m0266-5p		2	1	20	1598	1616	GTCCGGTCGATCGACTCATA	*|||:||||||||||:||*|	AAGGTCAGCTAGCTGGGT-T
		Nov-m0268-5p		2	1	21	1597	1617	GTGCCAGTCGATCGACTCGAT	:|*|||||||||||||:|:||	TAAGGTCAGCTAGCTGGGTTA
		Nov-m0266-5p		2.2	1	20	1556	1574	GTCCGGTCGATCGACTCATA	:|||:|:||||||||:||*|	TAGGTCGGCTAGCTGGGT-T
		Nov-m0266-5p		3	1	20	1577	1595	GTCCGGTCGATCGACTCATA	|:|*:||||||||||:||*|	CGGCTCAGCTAGCTGGGT-T
TRINITY_DN91612_c2_g3	Transcription factor GAMYB	miR159a	6	1.5	1	21	2000	2020	TTTGGATTGAAGGGAGCTCTA	*|||||*||||||||||||||	TAACCTCACTTCCCTCGAGAT
		miR159d		1.8	1	21	2000	2020	ATTGGATTGAAGGGAGCTCCG	||||||*||||||||||||*:	TAACCTCACTTCCCTCGAGAT
		miR159c		2	1	21	2001	2020	TTTGGATTGAAGGGAGCTCCT	*|||||*|||||||||||*||	TAACCTCACTTCCCTCGA-GA
		miR319i		2.5	1	20	2000	2019	TTGGGCTGAAGGGAGCTCCC	||||:*||||||||||||**	AACCTCACTTCCCTCGAGAT
		miR395c		3	1	21	1770	1790	CTGAAGTGTTTGGGGGGACTC	||||||:|:|||*|:|||*||	GACTTCGCGAACACTCCTAAG
		miR319a-3p.2-3p		3	1	20	2000	2019	TTGGACTGAAGGGTGCTCCC	|||||*|||||||*||||**	AACCTCACTTCCCTCGAGAT
TRINITY_DN90759_c4_g6	Snakin-1	Nov-m0011-3p	6	1.5	1	22	2500	2521	ACGTAAACAACATGATATATCG	|||||||||||*|:||||||||	TGCATTTGTTGGATTATATAGC
		Nov-m0082-3p		1.8	1	22	2501	2522	AACGTGAACAATCTGATGTATC	|||||:|||||:||:||:||||	TTGCATTTGTTGGATTATATAG
		Nov-m0132-3p		1.8	1	22	2502	2523	AAACGTAAACAACATGATGTAT	|||||||||||||*|:||:|||	TTTGCATTTGTTGGATTATATA
		Nov-m0069-3p		2	1	23	2495	2517	AAACAACCTGATGTATCGGAGGG	|||||||||:||:|||||*|*||	TTTGTTGGATTATATAGCGTGCC
		Nov-m0107-3p		3	1	24	2504	2527	AATTAAACGTAAACAATCTGATGT	||**||||||||||||:||:||:|	TTCCTTTGCATTTGTTGGATTATA
		Nov-m0108-3p		3	1	24	2504	2527	AATTAAACGTAAACAATCTGATGT	||**||||||||||||:||:||:|	TTCCTTTGCATTTGTTGGATTATA
TRINITY_DN90759_c4_g3	Protein FAM91A1	Nov-m0132-3p	6	0	1	22	1044	1065	AAACGTAAACAACATGATGTAT	||||||||||||||||||||||	TTTGCATTTGTTGTACTACATA
		Nov-m0011-3p		1	1	22	1042	1063	ACGTAAACAACATGATATATCG	||||||||||||||||*|||||	TGCATTTGTTGTACTACATAGC
		Nov-m0069-3p		1.2	1	23	1037	1059	AAACAACCTGATGTATCGGAGGG	|||||||*||||||||||||||:	TTTGTTGTACTACATAGCCTCCT
		Nov-m0082-3p		2	1	22	1043	1064	AACGTGAACAATCTGATGTATC	|||||:|||||:*|||||||||	TTGCATTTGTTGTACTACATAG
		Nov-m0107-3p		3	1	24	1046	1069	AATTAAACGTAAACAATCTGATGT	||**||||||||||||:*||||||	TTTCTTTGCATTTGTTGTACTACA
		Nov-m0108-3p		3	1	24	1046	1069	AATTAAACGTAAACAATCTGATGT	||**||||||||||||:*||||||	TTTCTTTGCATTTGTTGTACTACA
TRINITY_DN90590_c0_g1	PALE CRESS	Nov-m0132-3p	6	1	1	22	20	41	AAACGTAAACAACATGATGTAT	|||||||||||||*||||||||	TTTGCATTTGTTGAACTACATA
		Nov-m0107-3p		2	1	24	22	45	AATTAAACGTAAACAATCTGATGT	|||*||||||||||||:*||||||	TTATTTTGCATTTGTTGAACTACA
		Nov-m0108-3p		2	1	24	22	45	AATTAAACGTAAACAATCTGATGT	|||*||||||||||||:*||||||	TTATTTTGCATTTGTTGAACTACA
		Nov-m0082-3p		2.5	1	22	19	40	AACGTGAACAATCTGATGTATC	|||||:|||||:*||||||||*	TTGCATTTGTTGAACTACATAA
		Nov-m0069-3p		2.8	1	23	13	35	AAACAACCTGATGTATCGGAGGG	|||||||*||||||||*:||||*	TTTGTTGAACTACATAATCTCCA
		Nov-m0011-3p		2.8	1	22	18	39	ACGTAAACAACATGATATATCG	|||||||||||*||||*|||*:	TGCATTTGTTGAACTACATAAT
TRINITY_DN90399_c4_g4	G-protein coupled receptor 1	Nov-m0069-3p	6	1.2	1	23	777	799	AAACAACCTGATGTATCGGAGGG	|||||||||:|||||||:||::|	TTTGTTGGATTACATAGTCTTTC
		Nov-m0082-3p		1.5	1	22	783	804	AACGTGAACAATCTGATGTATC	|||||:|||||:||:|||||||	TTGCATTTGTTGGATTACATAG
		Nov-m0132-3p		1.5	1	22	784	805	AAACGTAAACAACATGATGTAT	|||||||||||||*|:||||||	TTTGCATTTGTTGGATTACATA
		Nov-m0107-3p		1.8	1	24	786	809	AATTAAACGTAAACAATCTGATGT	*||:||||||||||||:||:||||	GTAGTTTGCATTTGTTGGATTACA
		Nov-m0108-3p		1.8	1	24	786	809	AATTAAACGTAAACAATCTGATGT	*||:||||||||||||:||:||||	GTAGTTTGCATTTGTTGGATTACA
		Nov-m0011-3p		2.8	1	22	782	803	ACGTAAACAACATGATATATCG	|||||||||||*|:||*||||:	TGCATTTGTTGGATTACATAGT
TRINITY_DN90304_c1_g3	Transcription factor TCP4	miR319a-3p.2-3p	6	0.5	1	20	1480	1499	TTGGACTGAAGGGTGCTCCC	||||||||||||||:|||||	AACCTGACTTCCCATGAGGG
		miR319a		1.8	1	21	1479	1499	TTGGACTGAAGGGAGCTCCCT	|||||||||||||*:|||||:	AACCTGACTTCCCATGAGGGG
		miR319i		2	1	20	1480	1499	TTGGGCTGAAGGGAGCTCCC	||||:||||||||*:|||||	AACCTGACTTCCCATGAGGG
		miR159d		2.5	1	21	1480	1500	ATTGGATTGAAGGGAGCTCCG	||||||:|||||||*:||||*	TAACCTGACTTCCCATGAGGG
		miR159c		2.8	1	21	1480	1500	TTTGGATTGAAGGGAGCTCCT	*|||||:|||||||*:||||:	TAACCTGACTTCCCATGAGGG
		Nov-m0007-5p		0	1	24	1407	1430	ATGGACTGTGTTGAGAATGTGGGA	||||||||||||||||||||||||	TACCTGACACAACTCTTACACCCT
TRINITY_DN90149_c3_g2	E3 ubiquitin-protein ligase RHC2A	Nov-m0069-3p	6	1.5	1	23	20	42	AAACAACCTGATGTATCGGAGGG	|||||||||*||||||||||||*	TTTGTTGGAGTACATAGCCTCCA
		Nov-m0107-3p		2	1	24	29	52	AATTAAACGTAAACAATCTGATGT	|||*||||||||||||:||*||||	TTACTTTGCATTTGTTGGAGTACA
		Nov-m0108-3p		2	1	24	29	52	AATTAAACGTAAACAATCTGATGT	|||*||||||||||||:||*||||	TTACTTTGCATTTGTTGGAGTACA
		Nov-m0082-3p		2	1	22	26	47	AACGTGAACAATCTGATGTATC	|||||:|||||:||*|||||||	TTGCATTTGTTGGAGTACATAG
		Nov-m0132-3p		2	1	22	27	48	AAACGTAAACAACATGATGTAT	|||||||||||||*|*||||||	TTTGCATTTGTTGGAGTACATA
		Nov-m0011-3p		3	1	22	25	46	ACGTAAACAACATGATATATCG	|||||||||||*|*||*|||||	TGCATTTGTTGGAGTACATAGC
TRINITY_DN89645_c0_g3	Nicotinamidase 1	Nov-m0069-3p	6	2	1	23	117	139	AAACAACCTGATGTATCGGAGGG	||*|||||||||||||||:||:*	TTAGTTGGACTACATAGCTTCTA
		Nov-m0082-3p		2	1	22	123	144	AACGTGAACAATCTGATGTATC	|||||:|*|||:||||||||||	TTGCATTAGTTGGACTACATAG
		Nov-m0132-3p		2	1	22	124	145	AAACGTAAACAACATGATGTAT	||||||||*||||*||||||||	TTTGCATTAGTTGGACTACATA
		Nov-m0107-3p		3	1	24	126	149	AATTAAACGTAAACAATCTGATGT	||*:||||||||*|||:|||||||	TTCGTTTGCATTAGTTGGACTACA
		Nov-m0108-3p		3	1	24	126	149	AATTAAACGTAAACAATCTGATGT	||*:||||||||*|||:|||||||	TTCGTTTGCATTAGTTGGACTACA
		Nov-m0011-3p		3	1	22	122	143	ACGTAAACAACATGATATATCG	||||||*||||*||||*|||||	TGCATTAGTTGGACTACATAGC
TRINITY_DN89629_c1_g4	Transcription initiation factor TFIID subunit 11	Nov-m0107-3p	6	1.5	1	24	412	435	AATTAAACGTAAACAATCTGATGT	|||||||||||||*||:|||||||	TTAATTTGCATTTCTTGGACTACA
		Nov-m0069-3p		1.5	1	23	403	425	AAACAACCTGATGTATCGGAGGG	|||*||||||||||||||||:|:	TTTCTTGGACTACATAGCCTTCT
		Nov-m0108-3p		1.5	1	24	412	435	AATTAAACGTAAACAATCTGATGT	|||||||||||||*||:|||||||	TTAATTTGCATTTCTTGGACTACA
		Nov-m0082-3p		2	1	22	409	430	AACGTGAACAATCTGATGTATC	|||||:||*||:||||||||||	TTGCATTTCTTGGACTACATAG
		Nov-m0132-3p		2	1	22	410	431	AAACGTAAACAACATGATGTAT	|||||||||*|||*||||||||	TTTGCATTTCTTGGACTACATA
		Nov-m0011-3p		3	1	22	408	429	ACGTAAACAACATGATATATCG	|||||||*|||*||||*|||||	TGCATTTCTTGGACTACATAGC
TRINITY_DN89588_c6_g2	Flavonoid 3',5'-methyltransferase	Nov-m0082-3p	6	0.5	1	22	1367	1388	AACGTGAACAATCTGATGTATC	|||||:||||||||||||||||	TTGCATTTGTTAGACTACATAG
		Nov-m0069-3p		2	1	23	1361	1383	AAACAACCTGATGTATCGGAGGG	||||||*|||||||||||:||:*	TTTGTTAGACTACATAGCTTCTA
		Nov-m0132-3p		2	1	22	1368	1389	AAACGTAAACAACATGATGTAT	||||||||||||**||||||||	TTTGCATTTGTTAGACTACATA
		Nov-m0107-3p		3	1	24	1370	1393	AATTAAACGTAAACAATCTGATGT	|***||||||||||||||||||||	TACCTTTGCATTTGTTAGACTACA
		Nov-m0108-3p		3	1	24	1370	1393	AATTAAACGTAAACAATCTGATGT	|***||||||||||||||||||||	TACCTTTGCATTTGTTAGACTACA
		Nov-m0011-3p		3	1	22	1366	1387	ACGTAAACAACATGATATATCG	||||||||||**||||*|||||	TGCATTTGTTAGACTACATAGC
TRINITY_DN89588_c5_g2	U4/U6.U5 small nuclear ribonucleoprotein 27 kDa protein	Nov-m0069-3p	6	1	1	23	3593	3615	AAACAACCTGATGTATCGGAGGG	||||||||||||||||||||*|*	TTTGTTGGACTACATAGCCTACA
		Nov-m0082-3p		2.5	1	22	3599	3620	AACGTGAACAATCTGATGTATC	|*|:|:|||||:||||||||||	TCGTATTTGTTGGACTACATAG
		Nov-m0132-3p		2.5	1	22	3600	3621	AAACGTAAACAACATGATGTAT	||*|:||||||||*||||||||	TTCGTATTTGTTGGACTACATA
		Nov-m0107-3p		3	1	24	3602	3625	AATTAAACGTAAACAATCTGATGT	|||*||*|:|||||||:|||||||	TTACTTCGTATTTGTTGGACTACA
		Nov-m0108-3p		3	1	24	3602	3625	AATTAAACGTAAACAATCTGATGT	|||*||*|:|||||||:|||||||	TTACTTCGTATTTGTTGGACTACA
		Nov-m0011-3p		3	1	22	3598	3619	ACGTAAACAACATGATATATCG	*|:||||||||*||||*|||||	CGTATTTGTTGGACTACATAGC
TRINITY_DN89487_c1_g1	Flowering time control protein FPA	Nov-m0222-3p	6	3	1	21	1159	1178	GGCCTGAATTGCAATTTAGTT	:|*|||||||:||||:|*|:|	TCAGACTTAATGTTAGA-CGA
		Nov-m0222-3p		3	1	21	559	578	GGCCTGAATTGCAATTTAGTT	|:||||||:|:||||:|**||	CTGGACTTGATGTTAGA-GAA
		Nov-m0224-3p		3	1	21	1159	1178	GGCCTGAATTGCAATTTAGTT	:|*|||||||:||||:|*|:|	TCAGACTTAATGTTAGA-CGA
		Nov-m0224-3p		3	1	21	559	578	GGCCTGAATTGCAATTTAGTT	|:||||||:|:||||:|**||	CTGGACTTGATGTTAGA-GAA
		Nov-m0225-3p		3	1	21	1159	1178	GGCCTGAATTGCAATTTAGTT	:|*|||||||:||||:|*|:|	TCAGACTTAATGTTAGA-CGA
		Nov-m0225-3p		3	1	21	559	578	GGCCTGAATTGCAATTTAGTT	|:||||||:|:||||:|**||	CTGGACTTGATGTTAGA-GAA
TRINITY_DN88802_c2_g1	Nuclear transcription factor Y subunit A-3	miR169d-5p	6	1.5	1	21	1895	1916	AAGCCAAGGATGACTTGCC-GG	|||||||||||||*|||||*||	TTCGGTTCCTACTCAACGGACC
		miR169j		1.5	1	21	1896	1916	TAGCCAAGGATGACTTGCCTG	*||||||||||||*|||||||	TTCGGTTCCTACTCAACGGAC
		miR169d		2	1	21	1895	1916	TAGCCAAGGATGAATTGCC-GG	*||||||||||||*|||||*||	TTCGGTTCCTACTCAACGGACC
		miR169w		2.5	1	21	1896	1916	TAGCCAAGGATGACTTGCCCA	*||||||||||||*|||||**	TTCGGTTCCTACTCAACGGAC
		miR169y		2.5	1	21	1896	1916	TAGCCATGGATGAATTGCCTG	*|||||*||||||*|||||||	TTCGGTTCCTACTCAACGGAC
		miR169a		2.5	1	21	1895	1916	CAGCCAAGGATGACTTGCC-GA	*||||||||||||*|||||*|*	TTCGGTTCCTACTCAACGGACC
TRINITY_DN88713_c2_g4	Carotenoid cleavage dioxygenase 8 homolog B	Nov-m0132-3p	6	1	1	22	511	532	AAACGTAAACAACATGATGTAT	|||||||||||||*||||||||	TTTGCATTTGTTGGACTACATA
		Nov-m0069-3p		1.2	1	23	504	526	AAACAACCTGATGTATCGGAGGG	||||||||||||||||*|||||:	TTTGTTGGACTACATAACCTCCT
		Nov-m0082-3p		1.5	1	22	510	531	AACGTGAACAATCTGATGTATC	|||||:|||||:|||||||||*	TTGCATTTGTTGGACTACATAA
		Nov-m0107-3p		2.5	1	24	513	536	AATTAAACGTAAACAATCTGATGT	|*|*||||||||||||:|||||||	TAATTTTGCATTTGTTGGACTACA
		Nov-m0108-3p		2.5	1	24	513	536	AATTAAACGTAAACAATCTGATGT	|*|*||||||||||||:|||||||	TAATTTTGCATTTGTTGGACTACA
		Nov-m0011-3p		2.5	1	22	509	530	ACGTAAACAACATGATATATCG	|||||||||||*||||*|||*|	TGCATTTGTTGGACTACATAAC
TRINITY_DN88355_c0_g10	Argininosuccinate synthase	Nov-m0107-3p	6	1.2	1	24	139	162	AATTAAACGTAAACAATCTGATGT	||||||||||||||||:*||||:|	TTAATTTGCATTTGTTGAACTATA
		Nov-m0108-3p		1.2	1	24	139	162	AATTAAACGTAAACAATCTGATGT	||||||||||||||||:*||||:|	TTAATTTGCATTTGTTGAACTATA
		Nov-m0011-3p		1.5	1	22	135	156	ACGTAAACAACATGATATATCG	|||||||||||*|||||||:|:	TGCATTTGTTGAACTATATGGT
		Nov-m0132-3p		1.5	1	22	137	158	AAACGTAAACAACATGATGTAT	|||||||||||||*||||:||:	TTTGCATTTGTTGAACTATATG
		Nov-m0082-3p		2.5	1	22	136	157	AACGTGAACAATCTGATGTATC	|||||:|||||:*||||:||:|	TTGCATTTGTTGAACTATATGG
		Nov-m0069-3p		2.8	1	23	130	152	AAACAACCTGATGTATCGGAGGG	|||||||*||||:||:|:||*||	TTTGTTGAACTATATGGTCTACC
TRINITY_DN88126_c1_g5	AP2/ERF and B3 domain-containing transcription factor At1g50680	Nov-m0069-3p	6	1	1	23	23	45	AAACAACCTGATGTATCGGAGGG	|||||||||:||:||||||||||	TTTGTTGGATTATATAGCCTCCC
		Nov-m0011-3p		1.5	1	22	28	49	ACGTAAACAACATGATATATCG	|||||||||||*|:||||||||	TGCATTTGTTGGATTATATAGC
		Nov-m0082-3p		1.8	1	22	29	50	AACGTGAACAATCTGATGTATC	|||||:|||||:||:||:||||	TTGCATTTGTTGGATTATATAG
		Nov-m0132-3p		1.8	1	22	30	51	AAACGTAAACAACATGATGTAT	|||||||||||||*|:||:|||	TTTGCATTTGTTGGATTATATA
		Nov-m0107-3p		3	1	24	32	55	AATTAAACGTAAACAATCTGATGT	||**||||||||||||:||:||:|	TTTTTTTGCATTTGTTGGATTATA
		Nov-m0108-3p		3	1	24	32	55	AATTAAACGTAAACAATCTGATGT	||**||||||||||||:||:||:|	TTTTTTTGCATTTGTTGGATTATA
TRINITY_DN87952_c0_g1	B-box zinc finger protein 22	Nov-m0069-3p	6	1	1	23	2771	2793	AAACAACCTGATGTATCGGAGGG	||||||||||||:||||||||*|	TTTGTTGGACTATATAGCCTCAC
		Nov-m0011-3p		1	1	22	2776	2797	ACGTAAACAACATGATATATCG	|||||||||||*||||||||||	TGCATTTGTTGGACTATATAGC
		Nov-m0107-3p		1.2	1	24	2780	2803	AATTAAACGTAAACAATCTGATGT	|||:||||||||||||:|||||:|	TTAGTTTGCATTTGTTGGACTATA
		Nov-m0108-3p		1.2	1	24	2780	2803	AATTAAACGTAAACAATCTGATGT	|||:||||||||||||:|||||:|	TTAGTTTGCATTTGTTGGACTATA
		Nov-m0082-3p		1.2	1	22	2777	2798	AACGTGAACAATCTGATGTATC	|||||:|||||:|||||:||||	TTGCATTTGTTGGACTATATAG
		Nov-m0132-3p		1.2	1	22	2778	2799	AAACGTAAACAACATGATGTAT	|||||||||||||*||||:|||	TTTGCATTTGTTGGACTATATA
TRINITY_DN87142_c0_g1	AUXIN SIGNALING F-BOX 3	miR393a-5p	6	1	1	22	4231	4252	TCCAAAGGGATCGCATTGATCC	||||||||||||||||||*|*|	AGGTTTCCCTAGCGTAACAAAG
		miR156a		3	1	21	37	57	TGACAGAAGAGAGAGAGCACA	*||*||||||||:||||*||*	TCTCTCTTCTCTTTCTCTTGC
		Nov-m0013-3p		2.5	1	22	706	727	ACGTAAACAAATGACTGGAACG	||||||||||||||**||*|||	TGCATTTGTTTACTTCCCCTGC
		Nov-m0132-3p		2.5	1	22	825	847	AAACGTAAACAACATGATGT-AT	||||||||||||*||:||*|*||	TTTGCATTTGTTATATTAGACTA
		Nov-m0107-3p		2.8	1	24	828	851	AATTAAACGTAAACAATCTGATGT	||*:|||||||||||||*|:||*|	TTTGTTTGCATTTGTTATATTAGA
		Nov-m0108-3p		2.8	1	24	828	851	AATTAAACGTAAACAATCTGATGT	||*:|||||||||||||*|:||*|	TTTGTTTGCATTTGTTATATTAGA
TRINITY_DN87089_c1_g6	NAD(P)H-quinone oxidoreductase chain 4	Nov-m0107-3p	6	2.2	1	24	981	1004	AATTAAACGTAAACAATCTGATGT	|||:|||||||||*||:|||||:|	TTAGTTTGCATTTATTGGACTATA
		Nov-m0108-3p		2.2	1	24	981	1004	AATTAAACGTAAACAATCTGATGT	|||:|||||||||*||:|||||:|	TTAGTTTGCATTTATTGGACTATA
		Nov-m0011-3p		2.2	1	22	977	998	ACGTAAACAACATGATATATCG	|||||||*|||*|||||||||:	TGCATTTATTGGACTATATAGT
		Nov-m0082-3p		2.2	1	22	978	999	AACGTGAACAATCTGATGTATC	|||||:||*||:|||||:||||	TTGCATTTATTGGACTATATAG
		Nov-m0132-3p		2.2	1	22	979	1000	AAACGTAAACAACATGATGTAT	|||||||||*|||*||||:|||	TTTGCATTTATTGGACTATATA
		Nov-m0069-3p		2.5	1	23	972	994	AAACAACCTGATGTATCGGAGGG	|||*||||||||:||||:|||:*	TTTATTGGACTATATAGTCTCTA
TRINITY_DN86831_c4_g3	NAC domain-containing protein 82	miR156a	6	2.5	1	21	316	336	TGACAGAAGAGAGAGAGCACA	|||*||||||||||||:|**|	ACTTTCTTCTCTCTCTTGGAT
		miR156a-5p		3	1	20	318	336	TGACAGAAGAGAGTGAGCAC	|||*|||||||||*||:|*|	ACTTTCTTCTCTCTCTTG-G
		Nov-m0011-3p		2	1	22	5	26	ACGTAAACAACATGATATATCG	||||||||||**||||||||||	TGCATTTGTTCAACTATATAGC
		Nov-m0132-3p		2.2	1	22	7	28	AAACGTAAACAACATGATGTAT	||||||||||||**||||:|||	TTTGCATTTGTTCAACTATATA
		Nov-m0082-3p		2.8	1	22	6	27	AACGTGAACAATCTGATGTATC	|||||:|||||**||||:||||	TTGCATTTGTTCAACTATATAG
		Nov-m0069-3p		3	1	23	1	22	AAACAACCTGATGTATCGGAGGG	||||||**||||:|||||||*||	TTTGTTCAACTATATAGCCT-CC
TRINITY_DN86526_c0_g1	UDP-glucose 4-epimerase 2	miR164f	6	3	1	21	56	76	TGGAGAAGCAGGGCACATGCT	*|||||||*||||*||||*||	TCCTCTTCTTCCCTTGTAAGA
		Nov-m0107-3p		1.8	1	24	862	885	AATTAAACGTAAACAATCTGATGT	|||*||||||||||||||*||||:	TTATTTTGCATTTGTTAGCCTACG
		Nov-m0108-3p		1.8	1	24	862	885	AATTAAACGTAAACAATCTGATGT	|||*||||||||||||||*||||:	TTATTTTGCATTTGTTAGCCTACG
		Nov-m0082-3p		2.2	1	22	859	880	AACGTGAACAATCTGATGTATC	|||||:|||||||*||||:|*|	TTGCATTTGTTAGCCTACGTTG
		Nov-m0154-3p		2.8	1	24	1454	1477	AATTTCAGTCCAAAATAACAGGGC	||||*||:|||||||*||||||:|	TTAATGTTAGGTTTTCTTGTCCTG
		Nov-m0101-5p		3	1	23	1660	1682	TGAAACCGTTGTATGCATACAAG	|||*|*|||||||:||||||||*	ACTCTCGCAACATGCGTATGTTG
TRINITY_DN86357_c7_g3	E3 ubiquitin-protein ligase CHFR	Nov-m0132-3p	6	1.5	1	22	678	699	AAACGTAAACAACATGATGTAT	|||||||||||||*||||||*|	TTTGCATTTGTTGGACTACAGA
		Nov-m0082-3p		2	1	22	677	698	AACGTGAACAATCTGATGTATC	|||||:|||||:|||||||*|*	TTGCATTTGTTGGACTACAGAT
		Nov-m0069-3p		2.2	1	23	671	693	AAACAACCTGATGTATCGGAGGG	||||||||||||||*|*||||:|	TTTGTTGGACTACAGATCCTCTC
		Nov-m0107-3p		2.5	1	24	680	703	AATTAAACGTAAACAATCTGATGT	||**||||||||||||:|||||||	TTCCTTTGCATTTGTTGGACTACA
		Nov-m0108-3p		2.5	1	24	680	703	AATTAAACGTAAACAATCTGATGT	||**||||||||||||:|||||||	TTCCTTTGCATTTGTTGGACTACA
		Nov-m0011-3p		3	1	22	676	697	ACGTAAACAACATGATATATCG	|||||||||||*||||*|*|*|	TGCATTTGTTGGACTACAGATC
TRINITY_DN86081_c0_g1	B3 domain-containing protein Os01g0234100	Nov-m0224-5p	6	1.5	1	21	1111	1131	CTAAATTGCAATTCATGCCTT	|||||||:||||||||*||||	GATTTAATGTTAAGTAAGGAA
		Nov-m0222-5p		1.5	1	21	1111	1131	CTAAATTGCAATTCATGCCTT	|||||||:||||||||*||||	GATTTAATGTTAAGTAAGGAA
		Nov-m0225-5p		1.5	1	21	1111	1131	CTAAATTGCAATTCATGCCTT	|||||||:||||||||*||||	GATTTAATGTTAAGTAAGGAA
		Nov-m0223-5p		2.5	1	21	1111	1131	CCAAATTGCAATTCATGCCTT	|*|||||:||||||||*||||	GATTTAATGTTAAGTAAGGAA
		Nov-m0226-5p		2.5	1	21	1111	1131	CCAAATTGCAATTCATGCCTT	|*|||||:||||||||*||||	GATTTAATGTTAAGTAAGGAA
		Nov-m0051-5p		3	1	21	571	590	GGGCAGTTCTTCTTTGGCAGA	||||||*|*|||||||*||||	CCCGTCTACAAGAAAC-GTCT
TRINITY_DN85985_c0_g6	Elongation of fatty acids protein 3-like	miR171c-5p	6	2.5	1	21	39	59	GGATATTGGTGCGGTTCAATC	|*||||:||||||||||*||*	CGTATAGCCACGCCAAGGTAC
		Nov-m0080-5p		2	1	22	186	207	ACTCCATTTCATGACTGCTGAG	|||||||:||||||||:|:*|:	TGAGGTAGAGTACTGATGGATT
		Nov-m0132-3p		2	1	22	103	124	AAACGTAAACAACATGATGTAT	||*||||||||||*||||||||	TTGGCATTTGTTGGACTACATA
		Nov-m0082-3p		2.5	1	22	102	123	AACGTGAACAATCTGATGTATC	|*|||:|||||:|||||||||*	TGGCATTTGTTGGACTACATAA
		Nov-m0107-3p		3	1	24	105	128	AATTAAACGTAAACAATCTGATGT	*||*||*|||||||||:|||||||	ATATTTGGCATTTGTTGGACTACA
		Nov-m0108-3p		3	1	24	105	128	AATTAAACGTAAACAATCTGATGT	*||*||*|||||||||:|||||||	ATATTTGGCATTTGTTGGACTACA
TRINITY_DN85792_c0_g1	NIN-like protein 2	miR399b	6	2.5	1	21	973	993	TGCCAAAGGAGATTTGCCCGG	||||||*|:|||:|:||||||	ACGGTTCCTTCTGAGCGGGCC
		miR399h		2.5	1	21	973	993	TGCCAAAGGAGACTTGCCCAG	||||||*|:|||||:||||*|	ACGGTTCCTTCTGAGCGGGCC
		miR169j		2.8	1	21	974	994	TAGCCAAGGATGACTTGCCTG	|*||||||||*||||:|||:|	AACGGTTCCTTCTGAGCGGGC
		miR169w		3	1	21	974	994	TAGCCAAGGATGACTTGCCCA	|*||||||||*||||:||||*	AACGGTTCCTTCTGAGCGGGC
		Nov-m0052-3p		2.5	1	21	973	993	CGCCAAAGAAGACTTGCCCTG	*|||||*|||||||:||||*|	ACGGTTCCTTCTGAGCGGGCC
		Nov-m0051-3p		2.5	1	21	973	993	CGCCAAAGAAGACTTGCCCTG	*|||||*|||||||:||||*|	ACGGTTCCTTCTGAGCGGGCC
TRINITY_DN84450_c0_g1	Uncharacterized protein ORF91	Nov-m0107-3p	6	1	1	24	1619	1642	AATTAAACGTAAACAATCTGATGT	||||||||||||||||:||:||:|	TTAATTTGCATTTGTTGGATTATA
		Nov-m0108-3p		1	1	24	1619	1642	AATTAAACGTAAACAATCTGATGT	||||||||||||||||:||:||:|	TTAATTTGCATTTGTTGGATTATA
		Nov-m0132-3p		1.8	1	22	1617	1638	AAACGTAAACAACATGATGTAT	|||||||||||||*|:||:|||	TTTGCATTTGTTGGATTATATA
		Nov-m0011-3p		2.2	1	22	1615	1636	ACGTAAACAACATGATATATCG	|||||||||||*|:||||||*:	TGCATTTGTTGGATTATATAAT
		Nov-m0082-3p		2.2	1	22	1616	1637	AACGTGAACAATCTGATGTATC	|||||:|||||:||:||:|||*	TTGCATTTGTTGGATTATATAA
		Nov-m0199-5p		2.5	1	23	1465	1487	GGAAATACTCATGATCAACACCA	|||*|||||||||*||||||*||	CCTCTATGAGTACCAGTTGTAGT
TRINITY_DN67793_c0_g1	GIGANTEA	miR169d-5p	6	2.5	1	21	108	128	AAGCCAAGGATGACTTGCCGG	*||**||||||||||||||||	ATCCTTTCCTACTGAACGGCC
		miR160b-3p		2.5	1	21	683	702	GCGTATGAGGAGCCATGCATA	||*||||||||:|||:|*|||	CGAATACTCCTTGGTGC-TAT
		miR169j		2.5	1	21	108	128	TAGCCAAGGATGACTTGCCTG	|||**||||||||||||||*|	ATCCTTTCCTACTGAACGGCC
		miR169d		3	1	21	108	128	TAGCCAAGGATGAATTGCCGG	|||**||||||||*|||||||	ATCCTTTCCTACTGAACGGCC
		miR169w		3	1	21	108	128	TAGCCAAGGATGACTTGCCCA	|||**||||||||||||||**	ATCCTTTCCTACTGAACGGCC
		miR169a		3	1	21	108	128	CAGCCAAGGATGACTTGCCGA	*||**|||||||||||||||*	ATCCTTTCCTACTGAACGGCC
