# Supplementary material for: Integrated Analyses of miRNAome and Transcriptome Reveal The Function of miRNAs in Morphogenesis of Organs and Defense of Endophytes in Pseudostellaria Heterophylla
Source: Research Square preprint supplement (doi:10.21203/rs.3.rs-239755/v1), 2021-03-01
Supplement: Supplementary file 10 [file c6fae1b241b4ef8e52f4a7cc.xlsx]

## Sheet: Sheet1
miRNAs	target gene	score	query_start	query_end	target_start	target_end	query_seq	align	target_seq	cog	nog	cog_description	nog_description	KO_id	KO_name	paths	pfam	go	nr	swissprot
Phn-m0007-5p	TRINITY_DN90304_c1_g3	0	1	24	1407	1430	ATGGACTGTGTTGAGAATGTGGGA	||||||||||||||||||||||||	TACCTGACACAACTCTTACACCCT								PF03634.10(TCP:TCP family transcription factor); PF03732.14(Retrotrans_gag:Retrotransposon gag protein)		gi|731356574|ref|XP_010689747.1|( PREDICTED: transcription factor TCP4-like [Beta vulgaris subsp. vulgaris])	gi|75157409|sp|Q8LPR5.1|TCP4_ARATH(RecName: Full=Transcription factor TCP4; AltName: Full=Protein MATERNAL EFFECT EMBRYO ARREST 35)
Phn-m0013-3p	TRINITY_DN89978_c2_g1	0	1	22	548	569	ACGTAAACAAATGACTGGAACG	||||||||||||||||||||||	TGCATTTGTTTACTGACCTTGC								PF12937.4(F-box-like:F-box-like); PF00191.17(Annexin:Annexin)	GO:0043167(molecular_function:ion binding)	gi|902232411|gb|KNA22606.1|( hypothetical protein SOVF_030980 [Spinacia oleracea])	gi|294956516|sp|Q94CK4.2|ANXD8_ARATH(RecName: Full=Annexin D8; AltName: Full=AnnAt8)
Phn-m0015-5p	TRINITY_DN92547_c1_g2	0	1	24	466	489	AGACGATGACAGTACCTTAGGTGC	||||||||||||||||||||||||	TCTGCTACTGTCATGGAATCCACG					K09422	MYBP		PF00249.28(Myb_DNA-binding:Myb-like DNA-binding domain); PF13921.3(Myb_DNA-bind_6:Myb-like DNA-binding domain); PF15963.2(Myb_DNA-bind_7:Myb DNA-binding like)		gi|731343970|ref|XP_010683161.1|( PREDICTED: transcription factor MYB28-like [Beta vulgaris subsp. vulgaris])	gi|75333678|sp|Q9FDW1.1|MYB44_ARATH(RecName: Full=Transcription factor MYB44; AltName: Full=Myb-related protein 44; Short=AtMYB44; AltName: Full=Myb-related protein R1; Short=AtMYBR1)
Phn-m0016-5p	TRINITY_DN92343_c0_g7	0	1	22	185	206	GAGATTTTGTGGAACACCCTCT	||||||||||||||||||||||	CTCTAAAACACCTTGTGGGAGA								PF00319.15(SRF-TF:SRF-type transcription factor (DNA-binding and dimerisation domain))	GO:0006355(biological_process:regulation of transcription, DNA-templated); GO:0003677(molecular_function:DNA binding); GO:0046983(molecular_function:protein dimerization activity); GO:0005634(cellular_component:nucleus)	gi|902144310|gb|KNA04907.1|( hypothetical protein SOVF_195360 [Spinacia oleracea])	gi|75309162|sp|Q9FKK2.1|AGL62_ARATH(RecName: Full=Agamous-like MADS-box protein AGL62)
Phn-m0018-5p	TRINITY_DN88364_c1_g1	0	1	24	26	49	AATCCAGTCCAGATCCAATGGATC	||||||||||||||||||||||||	TTAGGTCAGGTCTAGGTTACCTAG									GO:0016491(molecular_function:oxidoreductase activity); GO:0055114(biological_process:oxidation-reduction process)	gi|225438615|ref|XP_002281012.1|( PREDICTED: NADPH-dependent 1-acyldihydroxyacetone phosphate reductase [Vitis vinifera])	gi|75311390|sp|Q9LN95.1|BH055_ARATH(RecName: Full=Transcription factor bHLH55; AltName: Full=Basic helix-loop-helix protein 55; Short=AtbHLH55; Short=bHLH 55; AltName: Full=Transcription factor EN 1; AltName: Full=bHLH transcription factor bHLH055)
Phn-m0026-3p	TRINITY_DN92939_c5_g4	0	1	24	793	816	AGAAGTATCTGACACGGGTGACTC	||||||||||||||||||||||||	TCTTCATAGACTGTGCCCACTGAG										gi|332322110|emb|CCA66009.1|( hypothetical protein [Beta vulgaris subsp. vulgaris])	gi|125987635|sp|P0C2F6.1|RNHX1_ARATH(RecName: Full=Putative ribonuclease H protein At1g65750)
Phn-m0028-3p	TRINITY_DN93113_c4_g1	0	1	24	897	920	AGTTAGTGGGACATGACATGGGAC	||||||||||||||||||||||||	TCAATCACCCTGTACTGTACCCTG	COG0339(E:Amino acid transport and metabolism )		COG0339(oligopeptidase a)		K01414	prlC		PF01432.17(Peptidase_M3:Peptidase family M3)	GO:0046872(molecular_function:metal ion binding); GO:0004222(molecular_function:metalloendopeptidase activity); GO:0006508(biological_process:proteolysis)	gi|902230795|gb|KNA21995.1|( hypothetical protein SOVF_038060 [Spinacia oleracea])	gi|75306307|sp|Q949P2.1|COPDA_ARATH(RecName: Full=Probable cytosolic oligopeptidase A; AltName: Full=Thimet metalloendopeptidase 2; AltName: Full=Zincin-like metalloproteases family protein 2)
Phn-m0033-5p	TRINITY_DN92712_c1_g1	0	1	24	2020	2043	GTATTCTTTTGGACTGCGGTTCTC	||||||||||||||||||||||||	CATAAGAAAACCTGACGCCAAGAG					K05666	ABCC2	map02010(ABC transporters)	PF00005.24(ABC_tran:ABC transporter); PF02463.16(SMC_N:RecF/RecN/SMC N terminal domain); PF01935.14(DUF87:Domain of unknown function DUF87); PF00270.26(DEAD:DEAD/DEAH box helicase); PF00097.22(zf-C3HC4:Zinc finger, C3HC4 type (RING finger)); PF13920.3(zf-C3HC4_3:Zinc finger, C3HC4 type (RING finger)); PF13639.3(zf-RING_2:Ring finger domain); PF13445.3(zf-RING_UBOX:RING-type zinc-finger); PF15227.…	GO:0042626(molecular_function:ATPase activity, coupled to transmembrane movement of substances); GO:0055085(biological_process:transmembrane transport); GO:0005524(molecular_function:ATP binding); GO:0016021(cellular_component:integral component of membrane)	gi|902226923|gb|KNA20533.1|( hypothetical protein SOVF_051460 [Spinacia oleracea])	gi|90103510|sp|Q7DM58.2|AB4C_ARATH(RecName: Full=ABC transporter C family member 4; Short=ABC transporter ABCC.4; Short=AtABCC4; AltName: Full=ATP-energized glutathione S-conjugate pump 4; AltName: Full=Glutathione S-conjugate-transporting ATPase 4; AltName: Full=Multidrug resistance-associated protein 4)
Phn-m0036-5p	TRINITY_DN86665_c2_g1	0	1	23	178	200	ATGGACTGGATCTGGATTGGATC	|||||||||||||||||||||||	TACCTGACCTAGACCTAACCTAG					K14497	PP2C	map04016(MAPK signaling pathway - plant); map04075(Plant hormone signal transduction)	PF00481.18(PP2C:Protein phosphatase 2C)	GO:0004721(molecular_function:phosphoprotein phosphatase activity); GO:0043169(molecular_function:cation binding)	gi|902180287|gb|KNA09519.1|( hypothetical protein SOVF_152860 isoform B [Spinacia oleracea])	gi|75286811|sp|Q5SN75.1|P2C08_ORYSJ(RecName: Full=Probable protein phosphatase 2C 8; Short=OsPP2C08)
Phn-m0036-5p	TRINITY_DN90887_c1_g2	0	1	23	57	79	ATGGACTGGATCTGGATTGGATC	|||||||||||||||||||||||	TACCTGACCTAGACCTAACCTAG								PF00069.22(Pkinase:Protein kinase domain); PF07714.14(Pkinase_Tyr:Protein tyrosine kinase); PF13540.3(RCC1_2:Regulator of chromosome condensation (RCC1) repeat); PF00406.19(ADK:Adenylate kinase); PF13207.3(AAA_17:AAA domain); PF13238.3(AAA_18:AAA domain); PF02223.14(Thymidylate_kin:Thymidylate kinase)	GO:0004672(molecular_function:protein kinase activity); GO:0016020(cellular_component:membrane); GO:0000166(molecular_function:nucleotide binding)	gi|731310982|ref|XP_010684433.1|( PREDICTED: serine/threonine-protein kinase-like protein CCR4 [Beta vulgaris subsp. vulgaris])	gi|75333916|sp|Q9FIJ6.1|ACCR4_ARATH(RecName: Full=Serine/threonine-protein kinase-like protein CCR4; AltName: Full=CRINKLY 4-related kinase 1; Short=AtCRK1; AltName: Full=Protein CRINKLY 4 RELATED 4; Short=AtCCR4; Flags: Precursor)
Phn-m0039-3p	TRINITY_DN91859_c2_g2	0	1	24	253	276	ATGCTTGTGTCAGGTACTTCTAAC	||||||||||||||||||||||||	TACGAACACAGTCCATGAAGATTG								PF04576.12(Zein-binding:Zein-binding)		gi|731352622|ref|XP_010687632.1|( PREDICTED: uncharacterized protein LOC104901730 [Beta vulgaris subsp. vulgaris])	gi|75170343|sp|Q9FG14.1|MYOB7_ARATH(RecName: Full=Myosin-binding protein 7)
Phn-m0047-3p	TRINITY_DN90451_c1_g2	0	1	23	2822	2844	TTGATGTTTGTCGGGTTCAAACT	|||||||||||||||||||||||	AACTACAAACAGCCCAAGTTTGA					K04733	IRAK4		PF07714.14(Pkinase_Tyr:Protein tyrosine kinase); PF00069.22(Pkinase:Protein kinase domain)	GO:0030247(molecular_function:polysaccharide binding); GO:0006468(biological_process:protein phosphorylation); GO:0005524(molecular_function:ATP binding); GO:0016021(cellular_component:integral component of membrane); GO:0004674(molecular_function:protein serine/threonine kinase activity)	gi|902229121|gb|KNA21389.1|( hypothetical protein SOVF_043650 [Spinacia oleracea])	gi|75333905|sp|Q9FID6.1|Y5392_ARATH(RecName: Full=Probable receptor-like protein kinase At5g39020; Flags: Precursor)
Phn-m0049-5p	TRINITY_DN88517_c2_g1	0	1	24	3133	3156	ATCCGTTGGATATGGACTGGATCT	||||||||||||||||||||||||	TAGGCAACCTATACCTGACCTAGA	COG0537(G:Carbohydrate transport and metabolism); COG0537(F:Nucleotide transport and metabolism)		COG0537(histidine triad (hIT) protein); COG0537(histidine triad (hIT) protein)		K01522	FHIT	map00230(Purine metabolism)		GO:0016787(molecular_function:hydrolase activity)	gi|731354896|ref|XP_010688849.1|( PREDICTED: bis(5'-adenosyl)-triphosphatase isoform X1 [Beta vulgaris subsp. vulgaris])	gi|1042851571|sp|F4KEV7.1|FHIT_ARATH(RecName: Full=Bifunctional bis(5'-adenosyl)-triphosphatase/adenylylsulfatase FHIT; AltName: Full=Fragile histidine triad protein; AltName: Full=Purine nucleoside phosphoramidase FHIT)
Phn-m0050-5p	TRINITY_DN89947_c1_g5	0	1	24	1078	1101	GAAATTAGTTATGAATGTGAATTT	||||||||||||||||||||||||	CTTTAATCAATACTTACACTTAAA									GO:0050832(biological_process:defense response to fungus); GO:0031640(biological_process:killing of cells of other organism)	gi|719963813|ref|XP_010250779.1|( PREDICTED: defensin Ec-AMP-D2-like [Nelumbo nucifera])	gi|17373811|sp|O65740.1|DEF2_CAPAN(RecName: Full=Defensin J1-2; Flags: Precursor)
Phn-m0051-3p	TRINITY_DN86988_c0_g5	0	1	21	1864	1884	CGCCAAAGAAGACTTGCCCTG	|||||||||||||||||||||	GCGGTTTCTTCTGAACGGGAC								PF10914.5(DUF2781:Protein of unknown function (DUF2781))	GO:0016020(cellular_component:membrane)	gi|902152673|gb|KNA05625.1|( hypothetical protein SOVF_188630 [Spinacia oleracea])	gi|82182937|sp|Q6DFQ5.1|TMM97_XENTR(RecName: Full=Transmembrane protein 97)
Phn-m0052-3p	TRINITY_DN86988_c0_g5	0	1	21	1864	1884	CGCCAAAGAAGACTTGCCCTG	|||||||||||||||||||||	GCGGTTTCTTCTGAACGGGAC								PF10914.5(DUF2781:Protein of unknown function (DUF2781))	GO:0016020(cellular_component:membrane)	gi|902152673|gb|KNA05625.1|( hypothetical protein SOVF_188630 [Spinacia oleracea])	gi|82182937|sp|Q6DFQ5.1|TMM97_XENTR(RecName: Full=Transmembrane protein 97)
Phn-m0053-3p	TRINITY_DN87850_c4_g1	0	1	24	3645	3668	AATAATGTTATATTTACGATCAAC	||||||||||||||||||||||||	TTATTACAATATAAATGCTAGTTG					K04733	IRAK4		PF00069.22(Pkinase:Protein kinase domain); PF07714.14(Pkinase_Tyr:Protein tyrosine kinase); PF00139.16(Lectin_legB:Legume lectin domain); PF03388.10(Lectin_leg-like:Legume-like lectin family)	GO:0030246(molecular_function:carbohydrate binding); GO:0006468(biological_process:protein phosphorylation); GO:0005524(molecular_function:ATP binding); GO:0016021(cellular_component:integral component of membrane); GO:0004674(molecular_function:protein serine/threonine kinase activity)	gi|731316565|ref|XP_010696037.1|( PREDICTED: probable L-type lectin-domain containing receptor kinase S.5 [Beta vulgaris subsp. vulgaris])	gi|75333861|sp|Q9FHG4.1|LRKS7_ARATH(RecName: Full=Probable L-type lectin-domain containing receptor kinase S.7; Short=LecRK-S.7; Flags: Precursor)
Phn-m0061-5p	TRINITY_DN87561_c1_g6	0	1	24	1116	1139	GTTAATATACGGGGTAAGGCTACG	||||||||||||||||||||||||	CAATTATATGCCCCATTCCGATGC		NOG11426(S:Function unknown )		NOG11426(PI-PLC X domain-containing protein)				PF12799.4(LRR_4:Leucine Rich repeats (2 copies)); PF12937.4(F-box-like:F-box-like); PF13516.3(LRR_6:Leucine Rich repeat)	GO:0016021(cellular_component:integral component of membrane); GO:0006629(biological_process:lipid metabolic process); GO:0008081(molecular_function:phosphoric diester hydrolase activity)	gi|731375968|ref|XP_010667419.1|( PREDICTED: PI-PLC X domain-containing protein At5g67130 [Beta vulgaris subsp. vulgaris])	gi|75163491|sp|Q93XX5.1|Y5713_ARATH(RecName: Full=PI-PLC X domain-containing protein At5g67130; Flags: Precursor)
Phn-m0063-3p	TRINITY_DN87285_c1_g1	0	1	24	1745	1768	GGAGTTCAACTTTATTTAGATCAG	||||||||||||||||||||||||	CCTCAAGTTGAAATAAATCTAGTC	COG4886(S:Function unknown )		COG4886(leucine Rich Repeat)					PF12819.4(Malectin_like:Carbohydrate-binding protein of the ER); PF11721.5(Malectin:Di-glucose binding within endoplasmic reticulum); PF08263.9(LRRNT_2:Leucine rich repeat N-terminal domain)		gi|731358977|ref|XP_010691039.1|( PREDICTED: probable LRR receptor-like serine/threonine-protein kinase PAM74 isoform X1 [Beta vulgaris subsp. vulgaris])	gi|75318738|sp|O81069.1|Y2899_ARATH(RecName: Full=Probable leucine-rich repeat receptor-like protein kinase At2g28990; Flags: Precursor)
Phn-m0064-3p	TRINITY_DN92462_c0_g5	0	1	24	657	680	ACTCGAGATATAACGGATCTGGAC	||||||||||||||||||||||||	TGAGCTCTATATTGCCTAGACCTG								PF14226.3(DIOX_N:non-haem dioxygenase in morphine synthesis N-terminal); PF03171.17(2OG-FeII_Oxy:2OG-Fe(II) oxygenase superfamily)	GO:0046872(molecular_function:metal ion binding)	gi|702462843|ref|XP_010028518.1|( PREDICTED: thebaine 6-O-demethylase-like [Eucalyptus grandis])	gi|122222383|sp|Q0JH50.1|GAOX2_ORYSJ(RecName: Full=Gibberellin 20 oxidase 2; AltName: Full=GA 20-oxidase 2; AltName: Full=Gibberellin C-20 oxidase 2; AltName: Full=Os20ox2; AltName: Full=Protein semidwarf-1 >gi|158705787|sp|P0C5H5.1|GAOX2_ORYSI RecName: Full=Gibberellin 20 oxidase 2; AltName: Full=GA 20-oxidase 2; AltName: Full=Gibberellin C-20 oxidase 2; AltName: Full=Os20ox2; AltName: Full=Prot…
Phn-m0066-3p	TRINITY_DN88264_c1_g7	0	1	23	1648	1670	TAGAGATACTGGCACTGATAGCC	|||||||||||||||||||||||	ATCTCTATGACCGTGACTATCGG								PF01061.21(ABC2_membrane:ABC-2 type transporter); PF00005.24(ABC_tran:ABC transporter); PF13191.3(AAA_16:AAA ATPase domain); PF13555.3(AAA_29:P-loop containing region of AAA domain); PF13304.3(AAA_21:AAA domain, putative AbiEii toxin, Type IV TA system)	GO:0016021(cellular_component:integral component of membrane); GO:0016887(molecular_function:ATPase activity); GO:0005524(molecular_function:ATP binding)	gi|731318527|ref|XP_010669774.1|( PREDICTED: ABC transporter G family member 6-like [Beta vulgaris subsp. vulgaris])	gi|259016169|sp|Q9M2V7.2|AB16G_ARATH(RecName: Full=ABC transporter G family member 16; Short=ABC transporter ABCG.16; Short=AtABCG16; AltName: Full=Probable white-brown complex homolog protein 16; Short=AtWBC16)
Phn-m0067-3p	TRINITY_DN85059_c0_g1	0	1	24	1478	1501	AATAACCTGTCTGGGGAAATTCCT	||||||||||||||||||||||||	TTATTGGACAGACCCCTTTAAGGA		NOG17872(S:Function unknown )		NOG17872(Leucine rich repeat N-terminal domain)				PF00069.22(Pkinase:Protein kinase domain); PF07714.14(Pkinase_Tyr:Protein tyrosine kinase); PF13855.3(LRR_8:Leucine rich repeat); PF12799.4(LRR_4:Leucine Rich repeats (2 copies)); PF08263.9(LRRNT_2:Leucine rich repeat N-terminal domain)	GO:0004672(molecular_function:protein kinase activity); GO:0006468(biological_process:protein phosphorylation); GO:0005524(molecular_function:ATP binding); GO:0016021(cellular_component:integral component of membrane)	gi|902216989|gb|KNA17581.1|( hypothetical protein SOVF_078170 [Spinacia oleracea])	gi|75268017|sp|Q9ZU46.1|ZAR1_ARATH(RecName: Full=Receptor protein kinase-like protein ZAR1; AltName: Full=Protein ZYGOTIC ARREST 1; Flags: Precursor)
Phn-m0068-5p	TRINITY_DN87686_c1_g1	0	1	24	1126	1149	AATCTGCCCGTTCTTCTGATGTGG	||||||||||||||||||||||||	TTAGACGGGCAAGAAGACTACACC								PF00069.22(Pkinase:Protein kinase domain); PF07714.14(Pkinase_Tyr:Protein tyrosine kinase); PF13855.3(LRR_8:Leucine rich repeat); PF00560.30(LRR_1:Leucine Rich Repeat); PF08263.9(LRRNT_2:Leucine rich repeat N-terminal domain); PF12799.4(LRR_4:Leucine Rich repeats (2 copies))	GO:0008152(biological_process:metabolic process); GO:0003824(molecular_function:catalytic activity)	gi|802644214|ref|XP_012079309.1|( PREDICTED: probable LRR receptor-like serine/threonine-protein kinase At4g37250 [Jatropha curcas])	gi|264664508|sp|C0LGS3.1|Y4372_ARATH(RecName: Full=Probable LRR receptor-like serine/threonine-protein kinase At4g37250; Flags: Precursor)
Phn-m0069-3p	TRINITY_DN88038_c0_g1	0	1	23	751	773	AAACAACCTGATGTATCGGAGGG	|||||||||||||||||||||||	TTTGTTGGACTACATAGCCTCCC					K16302	CNNM		PF01595.17(DUF21:Domain of unknown function DUF21); PF00571.25(CBS:CBS domain)	GO:0016021(cellular_component:integral component of membrane); GO:0003824(molecular_function:catalytic activity)	gi|731321921|ref|XP_010671607.1|( PREDICTED: DUF21 domain-containing protein At2g14520 isoform X3 [Beta vulgaris subsp. vulgaris])	gi|342179476|sp|Q9LTD8.2|Y5279_ARATH(RecName: Full=DUF21 domain-containing protein At5g52790; AltName: Full=CBS domain-containing protein CBSDUF5)
Phn-m0074-5p	TRINITY_DN88753_c3_g3	0	1	24	1252	1275	AGGATCGGGATTCTACTTTGGATC	||||||||||||||||||||||||	TCCTAGCCCTAAGATGAAACCTAG					K01568	PDC, pdc	map00010(Glycolysis / Gluconeogenesis)	PF02776.15(TPP_enzyme_N:Thiamine pyrophosphate enzyme, N-terminal TPP binding domain)	GO:0016831(molecular_function:carboxy-lyase activity); GO:0000287(molecular_function:magnesium ion binding); GO:0030976(molecular_function:thiamine pyrophosphate binding)	gi|33149681|gb|AAP96920.1|( pyruvate decarboxylase [Dianthus caryophyllus])	gi|75100743|sp|O82647.1|PDC1_ARATH(RecName: Full=Pyruvate decarboxylase 1; Short=AtPDC1)
Phn-m0075-3p	TRINITY_DN91496_c5_g1	0	1	24	71	94	AAAGAACCGTTGTTTGCATACGAC	||||||||||||||||||||||||	TTTCTTGGCAACAAACGTATGCTG					K00791	miaA, TRIT1	map00908(Zeatin biosynthesis)	PF01715.14(IPPT:IPP transferase); PF01745.13(IPT:Isopentenyl transferase); PF13671.3(AAA_33:AAA domain); PF13191.3(AAA_16:AAA ATPase domain); PF13245.3(AAA_19:Part of AAA domain); PF06414.9(Zeta_toxin:Zeta toxin)	GO:0005524(molecular_function:ATP binding); GO:0016740(molecular_function:transferase activity); GO:0008033(biological_process:tRNA processing)	gi|731329085|ref|XP_010675404.1|( PREDICTED: tRNA dimethylallyltransferase 9 [Beta vulgaris subsp. vulgaris])	gi|75308785|sp|Q9C5J6.1|IPT9_ARATH(RecName: Full=tRNA dimethylallyltransferase 9; AltName: Full=Isopentenyl-diphosphate: tRNA isopentenyltransferase 9; Short=AtIPT9; Short=IPP transferase 9; Short=IPPT 9)
Phn-m0077-5p	TRINITY_DN87013_c10_g3	0	1	24	758	781	ATCGACGCAATCTTCACCTTGGGT	||||||||||||||||||||||||	TAGCTGCGTTAGAAGTGGAACCCA					K08232	E1.6.5.4	map00053(Ascorbate and aldarate metabolism)			gi|731345613|ref|XP_010684010.1|( PREDICTED: uncharacterized protein LOC104898613 [Beta vulgaris subsp. vulgaris])	gi|50401174|sp|Q9LK94.1|MDAR4_ARATH(RecName: Full=Monodehydroascorbate reductase 4, peroxisomal; Short=AtMDAR4)
Phn-m0077-5p	TRINITY_DN89209_c0_g1	0	1	24	977	1000	ATCGACGCAATCTTCACCTTGGGT	||||||||||||||||||||||||	TAGCTGCGTTAGAAGTGGAACCCA										gi|147798181|emb|CAN73890.1|( hypothetical protein VITISV_033644 [Vitis vinifera])	gi|75274951|sp|O23702.1|CTBP_ARATH(RecName: Full=C-terminal binding protein AN; Short=CtBP; AltName: Full=Protein ANGUSTIFOLIA; AltName: Full=Protein DETORQUEO)
Phn-m0077-5p	TRINITY_DN90755_c1_g1	0	1	24	25	48	ATCGACGCAATCTTCACCTTGGGT	||||||||||||||||||||||||	TAGCTGCGTTAGAAGTGGAACCCA	COG5273(R:General function prediction only )		COG5273(Zinc finger, DHHC-type containing)		K20029	ZDHHC3_7_25		PF01529.17(zf-DHHC:DHHC palmitoyltransferase)	GO:0016021(cellular_component:integral component of membrane); GO:0008270(molecular_function:zinc ion binding); GO:0019706(molecular_function:protein-cysteine S-palmitoyltransferase activity)	gi|731334171|ref|XP_010678089.1|( PREDICTED: probable protein S-acyltransferase 16 isoform X2 [Beta vulgaris subsp. vulgaris])	gi|75249276|sp|Q93VV0.1|ZDHC6_ARATH(RecName: Full=Probable protein S-acyltransferase 16; AltName: Full=Probable palmitoyltransferase At3g09320; AltName: Full=Zinc finger DHHC domain-containing protein At3g09320)
Phn-m0082-3p	TRINITY_DN91165_c0_g8	0	1	22	391	412	AACGTGAACAATCTGATGTATC	||||||||||||||||||||||	TTGCACTTGTTAGACTACATAG								PF12165.5(DUF3594:Domain of unknown function (DUF3594)); PF00628.26(PHD:PHD-finger)	GO:0046872(molecular_function:metal ion binding)	gi|902221836|gb|KNA19019.1|( hypothetical protein SOVF_065470 [Spinacia oleracea])	gi|75262387|sp|Q9FFF5.1|ALFL1_ARATH(RecName: Full=PHD finger protein ALFIN-LIKE 1; Short=Protein AL1)
Phn-m0087-5p	TRINITY_DN88477_c7_g1	0	1	22	3937	3958	TAAGGCCATGTTCTTTTGGACT	||||||||||||||||||||||	ATTCCGGTACAAGAAAACCTGA	COG3332(S:Function unknown )		COG3332(ser Thr-rich protein T10 in DGCR)					PF05742.9(TANGO2:Transport and Golgi organisation 2)		gi|731358077|ref|XP_010690540.1|( PREDICTED: transport and Golgi organization protein 2 homolog [Beta vulgaris subsp. vulgaris])	gi|1711658|sp|P54797.1|TNG2_MOUSE(RecName: Full=Transport and Golgi organization 2 homolog; AltName: Full=Ser/Thr-rich protein T10 in DGCR region)
Phn-m0087-5p	TRINITY_DN88677_c4_g5	0	1	22	68	89	TAAGGCCATGTTCTTTTGGACT	||||||||||||||||||||||	ATTCCGGTACAAGAAAACCTGA									GO:0016021(cellular_component:integral component of membrane)	gi|731320672|ref|XP_010670938.1|( PREDICTED: cysteine-rich repeat secretory protein 3 [Beta vulgaris subsp. vulgaris])	gi|75097575|sp|O22784.2|CRR11_ARATH(RecName: Full=Cysteine-rich repeat secretory protein 11; AltName: Full=Plasmodesmata-located protein 3; Short=PDLP3; Flags: Precursor)
Phn-m0087-5p	TRINITY_DN90014_c0_g1	0	1	22	476	497	TAAGGCCATGTTCTTTTGGACT	||||||||||||||||||||||	ATTCCGGTACAAGAAAACCTGA					K00514	ZDS, crtQ	map00906(Carotenoid biosynthesis)		GO:0052889(biological_process:9,9'-di-cis-zeta-carotene desaturation to 7,9,7',9'-tetra-cis-lycopene); GO:0009509(cellular_component:chromoplast); GO:0016117(biological_process:carotenoid biosynthetic process); GO:0052886(molecular_function:9,9'-dicis-carotene:quinone oxidoreductase activity); GO:0052887(molecular_function:7,9,9'-tricis-neurosporene:quinone oxidoreductase activity); GO:0009507(ce…	gi|731328056|ref|XP_010674842.1|( PREDICTED: zeta-carotene desaturase, chloroplastic/chromoplastic [Beta vulgaris subsp. vulgaris])	gi|122237632|sp|Q1JPL4.1|NDB1_ARATH(RecName: Full=External alternative NAD(P)H-ubiquinone oxidoreductase B1, mitochondrial; AltName: Full=External alternative NADH dehydrogenase NDB1; AltName: Full=NADH:ubiquinone reductase (non-electrogenic) NDB1; Flags: Precursor)
Phn-m0087-5p	TRINITY_DN91433_c4_g4	0	1	22	910	931	TAAGGCCATGTTCTTTTGGACT	||||||||||||||||||||||	ATTCCGGTACAAGAAAACCTGA					K04681	RBL1			GO:0006357(biological_process:regulation of transcription from RNA polymerase II promoter); GO:0051726(biological_process:regulation of cell cycle); GO:0005634(cellular_component:nucleus)	gi|731362115|ref|XP_010692724.1|( PREDICTED: retinoblastoma-related protein isoform X2 [Beta vulgaris subsp. vulgaris])	gi|75266074|sp|Q9SLZ4.1|RBR1_PEA(RecName: Full=Retinoblastoma-related protein 1; Short=PsRB1)
Phn-m0088-3p	TRINITY_DN92260_c1_g1	0	1	24	397	420	ATTGGTGACCCGATTAACTCGACC	||||||||||||||||||||||||	TAACCACTGGGCTAATTGAGCTGG	COG3866(G:Carbohydrate transport and metabolism )		COG3866(Pectate lyase)		K01728	pel	map00040(Pentose and glucuronate interconversions)	PF00544.16(Pec_lyase_C:Pectate lyase); PF13229.3(Beta_helix:Right handed beta helix region)	GO:0016021(cellular_component:integral component of membrane); GO:0046872(molecular_function:metal ion binding); GO:0030570(molecular_function:pectate lyase activity); GO:0045490(biological_process:pectin catabolic process)	gi|731368723|ref|XP_010696303.1|( PREDICTED: probable pectate lyase 12 [Beta vulgaris subsp. vulgaris])	gi|32129931|sp|Q9SCP2.2|PLY12_ARATH(RecName: Full=Probable pectate lyase 12; Flags: Precursor)
Phn-m0092-5p	TRINITY_DN86223_c4_g2	0	1	22	1159	1180	CGATCCAGTTCCGAAAACGGAC	||||||||||||||||||||||	GCTAGGTCAAGGCTTTTGCCTG	COG0451(M:Cell wall/membrane/envelope biogenesis )		COG0451(Nad-dependent epimerase dehydratase)		K08679	E5.1.3.6	map00520(Amino sugar and nucleotide sugar metabolism)	PF01370.18(Epimerase:NAD dependent epimerase/dehydratase family); PF16363.2(GDP_Man_Dehyd:GDP-mannose 4,6 dehydratase); PF01073.16(3Beta_HSD:3-beta hydroxysteroid dehydrogenase/isomerase family); PF04321.14(RmlD_sub_bind:RmlD substrate binding domain); PF02719.12(Polysacc_synt_2:Polysaccharide biosynthesis protein); PF07993.9(NAD_binding_4:Male sterility protein); PF00106.22(adh_short:short chain…	GO:0005975(biological_process:carbohydrate metabolic process); GO:0016021(cellular_component:integral component of membrane); GO:0050662(molecular_function:coenzyme binding); GO:0016857(molecular_function:racemase and epimerase activity, acting on carbohydrates and derivatives)	gi|902170209|gb|KNA07801.1|( hypothetical protein SOVF_168640 [Spinacia oleracea])	gi|75311748|sp|Q9M0B6.1|GAE1_ARATH(RecName: Full=UDP-glucuronate 4-epimerase 1; AltName: Full=UDP-glucuronic acid epimerase 1; Short=AtUGlcAE3)
Phn-m0104-3p	TRINITY_DN92048_c4_g1	0	1	24	3241	3264	ATAGAGAAATGAATGACACAGAGG	||||||||||||||||||||||||	TATCTCTTTACTTACTGTGTCTCC					K13865	SLC7A3, ATRC3		PF13520.3(AA_permease_2:Amino acid permease); PF00324.18(AA_permease:Amino acid permease); PF13906.3(AA_permease_C:C-terminus of AA_permease)		gi|731332326|ref|XP_010677143.1|( PREDICTED: cationic amino acid transporter 7, chloroplastic-like [Beta vulgaris subsp. vulgaris])	gi|75313793|sp|Q9SQZ0.1|CAAT7_ARATH(RecName: Full=Cationic amino acid transporter 7, chloroplastic; Flags: Precursor)
Phn-m0105-3p	TRINITY_DN92485_c0_g6	0	1	24	1157	1180	ACCTGTGGTGCTCAATATGCTCGC	||||||||||||||||||||||||	TGGACACCACGAGTTATACGAGCG								PF00501.25(AMP-binding:AMP-binding enzyme); PF13193.3(AMP-binding_C:AMP-binding enzyme C-terminal domain)	GO:0016874(molecular_function:ligase activity); GO:0008152(biological_process:metabolic process)	gi|902149563|gb|KNA05329.1|( hypothetical protein SOVF_191410 [Spinacia oleracea])	gi|75309027|sp|Q9FFE9.1|AAE6_ARATH(RecName: Full=Probable acyl-activating enzyme 6; AltName: Full=AMP-binding protein 6; Short=AtAMPBP6)
Phn-m0106-5p	TRINITY_DN86631_c1_g6	0	1	22	247	268	GGGAATATTGTTTTAATGGATG	||||||||||||||||||||||	CCCTTATAACAAAATTACCTAC					K09422	MYBP		PF00249.28(Myb_DNA-binding:Myb-like DNA-binding domain); PF13921.3(Myb_DNA-bind_6:Myb-like DNA-binding domain)		gi|731372347|ref|XP_010666321.1|( PREDICTED: transcription factor MYB108-like [Beta vulgaris subsp. vulgaris])	gi|75334847|sp|Q9LDE1.1|MY108_ARATH(RecName: Full=Transcription factor MYB108; AltName: Full=Myb-related protein 108; Short=AtMYB108; AltName: Full=Protein BOTRYTIS-SUSCEPTIBLE 1)
Phn-m0111-3p	TRINITY_DN86417_c2_g1	0	1	24	642	665	ATTTTAGGGAGTTAAGACGAGACT	||||||||||||||||||||||||	TAAAATCCCTCAATTCTGCTCTGA					K03257	EIF4A	map03013(RNA transport)			gi|731373347|ref|XP_010666624.1|( PREDICTED: uncharacterized protein LOC104883764 [Beta vulgaris subsp. vulgaris])	gi|1352438|sp|Q10055.1|FAL1_SCHPO(RecName: Full=ATP-dependent RNA helicase fal1)
Phn-m0125-5p	TRINITY_DN92461_c3_g3	0	1	24	219	242	ACCGAGTGGTACCGAGTTTCAATA	||||||||||||||||||||||||	TGGCTCACCATGGCTCAAAGTTAT					K15718	LOX1_5	map00591(Linoleic acid metabolism)	PF00305.16(Lipoxygenase:Lipoxygenase)	GO:0031408(biological_process:oxylipin biosynthetic process); GO:0046872(molecular_function:metal ion binding); GO:0016702(molecular_function:oxidoreductase activity, acting on single donors with incorporation of molecular oxygen, incorporation of two atoms of oxygen); GO:0055114(biological_process:oxidation-reduction process)	gi|731327848|ref|XP_010674736.1|( PREDICTED: probable linoleate 9S-lipoxygenase 5 [Beta vulgaris subsp. vulgaris])	gi|75282482|sp|Q43191.1|LOX15_SOLTU(RecName: Full=Probable linoleate 9S-lipoxygenase 5; AltName: Full=Leaf lipoxygenase)
Phn-m0127-5p	TRINITY_DN87557_c3_g5	0	1	21	2355	2375	ACGGCTGACGTTTAACAATGC	|||||||||||||||||||||	TGCCGACTGCAAATTGTTACG					K11721	BRD3		PF17035.2(BET:Bromodomain extra-terminal - transcription regulation); PF00439.22(Bromodomain:Bromodomain)	GO:0016746(molecular_function:transferase activity, transferring acyl groups)	gi|731359793|ref|XP_010691469.1|( PREDICTED: transcription factor GTE2-like [Beta vulgaris subsp. vulgaris])	gi|75146221|sp|Q7Y214.1|GTE7_ARATH(RecName: Full=Transcription factor GTE7; AltName: Full=Bromodomain-containing protein GTE7; AltName: Full=Protein GLOBAL TRANSCRIPTION FACTOR GROUP E7)
Phn-m0131-5p	TRINITY_DN90895_c0_g2	0	1	24	56	79	ATCAAAGAAAACAATATTATTTAT	||||||||||||||||||||||||	TAGTTTCTTTTGTTATAATAAATA	COG1502(I:Lipid transport and metabolism )		COG1502(Catalyzes the reversible phosphatidyl group transfer from one phosphatidylglycerol molecule to another to form cardiolipin (CL) (diphosphatidylglycerol) and glycerol (By similarity))		K01115	PLD1_2	map00565(Ether lipid metabolism); map00564(Glycerophospholipid metabolism); map04144(Endocytosis)	PF00614.19(PLDc:Phospholipase D Active site motif); PF12357.5(PLD_C:Phospholipase D C terminal)	GO:0006629(biological_process:lipid metabolic process); GO:0008081(molecular_function:phosphoric diester hydrolase activity); GO:0004620(molecular_function:phospholipase activity)	gi|902220562|gb|KNA18650.1|( hypothetical protein SOVF_068870 [Spinacia oleracea])	gi|403399488|sp|P86387.1|PLDA1_CARPA(RecName: Full=Phospholipase D alpha 1; Short=CpPLD1; AltName: Full=Choline phosphatase 1; AltName: Full=Phosphatidylcholine-hydrolyzing phospholipase D 1)
Phn-m0131-5p	TRINITY_DN90983_c5_g1	0	1	24	17	40	ATCAAAGAAAACAATATTATTTAT	||||||||||||||||||||||||	TAGTTTCTTTTGTTATAATAAATA								PF05562.8(WCOR413:Cold acclimation protein WCOR413)	GO:0016021(cellular_component:integral component of membrane); GO:0005774(cellular_component:vacuolar membrane)	gi|731358850|ref|XP_010690970.1|( PREDICTED: cold-regulated 413 plasma membrane protein 2 [Beta vulgaris subsp. vulgaris])	gi|75212080|sp|Q9SVL6.1|CRPM2_ARATH(RecName: Full=Cold-regulated 413 plasma membrane protein 2; Short=AtCOR413-PM2)
Phn-m0132-3p	TRINITY_DN90759_c4_g3	0	1	22	1044	1065	AAACGTAAACAACATGATGTAT	||||||||||||||||||||||	TTTGCATTTGTTGTACTACATA		NOG08754(S:Function unknown )		NOG08754(Family with sequence similarity 91, member A1)				PF14647.3(FAM91_N:FAM91 N-terminus); PF14648.3(FAM91_C:FAM91 C-terminus)		gi|731312672|ref|XP_010675835.1|( PREDICTED: protein FAM91A1 isoform X1 [Beta vulgaris subsp. vulgaris])	gi|123797490|sp|Q3UVG3.1|F91A1_MOUSE(RecName: Full=Protein FAM91A1)
Phn-m0134-5p	TRINITY_DN90288_c2_g2	0	1	22	946	967	GAGAATTGATATGATGATTGTT	||||||||||||||||||||||	CTCTTAACTATACTACTAACAA	COG5539(O:Posttranslational modification, protein turnover, chaperones )		COG5539(otu domain-containing protein)		K18342	OTUD6		PF02338.16(OTU:OTU-like cysteine protease)		gi|902216992|gb|KNA17584.1|( hypothetical protein SOVF_078200 isoform A [Spinacia oleracea])	gi|75155093|sp|Q8LBZ4.1|OTU_ARATH(RecName: Full=OTU domain-containing protein At3g57810)
Phn-m0147-3p	TRINITY_DN91873_c2_g1	0	1	24	350	373	AGGGATAACGTGGAGTTCACTTTA	||||||||||||||||||||||||	TCCCTATTGCACCTCAAGTGAAAT	COG1131(V:Defense mechanisms )		COG1131((ABC) transporter)					PF01061.21(ABC2_membrane:ABC-2 type transporter); PF00005.24(ABC_tran:ABC transporter); PF03193.13(DUF258:Protein of unknown function, DUF258); PF12698.4(ABC2_membrane_3:ABC-2 family transporter protein)	GO:0016021(cellular_component:integral component of membrane); GO:0016887(molecular_function:ATPase activity); GO:0005524(molecular_function:ATP binding)	gi|731333176|ref|XP_010677592.1|( PREDICTED: ABC transporter G family member 22 [Beta vulgaris subsp. vulgaris])	gi|75331764|sp|Q93YS4.1|AB22G_ARATH(RecName: Full=ABC transporter G family member 22; Short=ABC transporter ABCG.22; Short=AtABCG22; AltName: Full=White-brown complex homolog protein 23; Short=AtWBC23)
Phn-m0166-3p	TRINITY_DN88751_c3_g1	0	1	24	2150	2173	AGGGATGAGACACAAAATGGAACC	||||||||||||||||||||||||	TCCCTACTCTGTGTTTTACCTTGG		NOG00564(D:Cell cycle control, cell division, chromosome partitioning )		NOG00564(Cell division cycle)	K03353	APC6, CDC16	map04120(Ubiquitin mediated proteolysis)	PF07719.14(TPR_2:Tetratricopeptide repeat); PF00515.25(TPR_1:Tetratricopeptide repeat); PF12895.4(ANAPC3:Anaphase-promoting complex, cyclosome, subunit 3); PF13181.3(TPR_8:Tetratricopeptide repeat); PF13424.3(TPR_12:Tetratricopeptide repeat); PF13176.3(TPR_7:Tetratricopeptide repeat); PF13432.3(TPR_16:Tetratricopeptide repeat); PF13374.3(TPR_10:Tetratricopeptide repeat); PF13414.3(TPR_11:TPR repe…		gi|902217379|gb|KNA17673.1|( hypothetical protein SOVF_077770 isoform A [Spinacia oleracea])	gi|302595634|sp|B3DNN5.1|CDC16_ARATH(RecName: Full=Anaphase-promoting complex subunit 6; AltName: Full=Cell division cycle protein 16 homolog; Short=CDC16 homolog; AltName: Full=Cyclosome subunit 6; AltName: Full=Protein NOMEGA)
Phn-m0179-5p	TRINITY_DN85629_c3_g2	0	1	23	357	379	TGATTCCAGAGTCGTGGTGATTC	|||||||||||||||||||||||	ACTAAGGTCTCAGCACCACTAAG								PF04564.12(U-box:U-box domain); PF11789.5(zf-Nse:Zinc-finger of the MIZ type in Nse subunit)		gi|902192096|gb|KNA11970.1|( hypothetical protein SOVF_130100 [Spinacia oleracea])	gi|75309180|sp|Q9FLF4.1|PUB27_ARATH(RecName: Full=U-box domain-containing protein 27; AltName: Full=Plant U-box protein 27)
Phn-m0182-5p	TRINITY_DN90830_c1_g3	0	1	24	1222	1245	AGGTTATATAACGTTGATTGAGCC	||||||||||||||||||||||||	TCCAATATATTGCAACTAACTCGG								PF01754.13(zf-A20:A20-like zinc finger); PF01428.13(zf-AN1:AN1-like Zinc finger)	GO:0005488(molecular_function:binding)	gi|976904187|gb|KVH91925.1|( Zinc finger, A20-type [Cynara cardunculus var. scolymus])	gi|73921296|sp|Q9SZ69.1|SAP7_ARATH(RecName: Full=Zinc finger A20 and AN1 domain-containing stress-associated protein 7; Short=AtSAP7)
Phn-m0182-5p	TRINITY_DN90830_c1_g6	0	1	24	3371	3394	AGGTTATATAACGTTGATTGAGCC	||||||||||||||||||||||||	TCCAATATATTGCAACTAACTCGG					K20296	ANG2, VPS51		PF08700.8(Vps51:Vps51/Vps67); PF15469.3(Sec5:Exocyst complex component Sec5); PF04124.9(Dor1:Dor1-like family); PF06148.8(COG2:COG (conserved oligomeric Golgi) complex component, COG2); PF10392.6(COG5:Golgi transport complex subunit 5)		gi|902177831|gb|KNA09029.1|( hypothetical protein SOVF_157410 [Spinacia oleracea])	gi|71153003|sp|Q9UID3.2|VPS51_HUMAN(RecName: Full=Vacuolar protein sorting-associated protein 51 homolog; AltName: Full=Another new gene 2 protein; AltName: Full=Protein fat-free homolog)
Phn-m0185-3p	TRINITY_DN92183_c2_g2	0	1	22	681	702	ATGAGACAAAAACCATGAATTG	||||||||||||||||||||||	TACTCTGTTTTTGGTACTTAAC											gi|221271823|sp|A4QL28.1|ACCD_DRANE(RecName: Full=Acetyl-coenzyme A carboxylase carboxyl transferase subunit beta, chloroplastic; Short=ACCase subunit beta; Short=Acetyl-CoA carboxylase carboxyltransferase subunit beta)
Phn-m0191-3p	TRINITY_DN84691_c0_g2	0	1	21	216	236	ACGATCAGCTAATTTCTTAGC	|||||||||||||||||||||	TGCTAGTCGATTAAAGAATCG								PF01443.15(Viral_helicase1:Viral (Superfamily 1) RNA helicase); PF12467.5(CMV_1a:Cucumber mosaic virus 1a protein family); PF12503.5(CMV_1a_C:Cucumber mosaic virus 1a protein C terminal); PF13604.3(AAA_30:AAA domain)	GO:0003723(molecular_function:RNA binding); GO:0006396(biological_process:RNA processing); GO:0016817(molecular_function:hydrolase activity, acting on acid anhydrides); GO:0008174(molecular_function:mRNA methyltransferase activity); GO:0005524(molecular_function:ATP binding); GO:0080009(biological_process:mRNA methylation)	gi|779752353|gb|AJY78066.1|( 1a protein [Cucumber mosaic virus])	gi|137255|sp|P06011.1|1A_CMVQ(RecName: Full=Replication protein 1a; Includes: RecName: Full=ATP-dependent helicase; Includes: RecName: Full=Methyltransferase)
Phn-m0192-3p	TRINITY_DN93026_c3_g2	0	1	22	23	44	AACCTGGACCTGTAGGAATAGT	||||||||||||||||||||||	TTGGACCTGGACATCCTTATCA					K08488	STX7	map04145(Phagosome); map04130(SNARE interactions in vesicular transport)	PF14523.3(Syntaxin_2:Syntaxin-like protein)	GO:0016020(cellular_component:membrane); GO:0006810(biological_process:transport)	gi|567221128|ref|XP_006414193.1|( hypothetical protein EUTSA_v10025956mg [Eutrema salsugineum])	gi|28380150|sp|O04378.1|SYP23_ARATH(RecName: Full=Syntaxin-23; Short=AtPLP; Short=AtSYP23; AltName: Full=AtPEP12-like protein)
Phn-m0200-5p	TRINITY_DN90124_c0_g2	0	1	23	1201	1223	TATTGTGACCATCATTTAATCTT	|||||||||||||||||||||||	ATAACACTGGTAGTAAATTAGAA								PF10155.6(DUF2363:Uncharacterized conserved protein (DUF2363))		gi|731327034|ref|XP_010674320.1|( PREDICTED: CCR4-NOT transcription complex subunit 11 isoform X1 [Beta vulgaris subsp. vulgaris])	gi|71152358|sp|Q9UKZ1.1|CNO11_HUMAN(RecName: Full=CCR4-NOT transcription complex subunit 11)
Phn-m0201-5p	TRINITY_DN90124_c0_g2	0	1	23	1201	1223	TATTGTGACCATCATTTAATCTT	|||||||||||||||||||||||	ATAACACTGGTAGTAAATTAGAA								PF10155.6(DUF2363:Uncharacterized conserved protein (DUF2363))		gi|731327034|ref|XP_010674320.1|( PREDICTED: CCR4-NOT transcription complex subunit 11 isoform X1 [Beta vulgaris subsp. vulgaris])	gi|71152358|sp|Q9UKZ1.1|CNO11_HUMAN(RecName: Full=CCR4-NOT transcription complex subunit 11)
Phn-m0202-5p	TRINITY_DN85840_c4_g1	0	1	24	2793	2816	ATTTCTCCACCATAGTAGAAATGG	||||||||||||||||||||||||	TAAAGAGGTGGTATCATCTTTACC					K14773	UTP23		PF04900.9(Fcf1:Fcf1)	GO:0032040(cellular_component:small-subunit processome)	gi|143346850|gb|ABO93204.1|( unknown protein, partial [Silene latifolia])	gi|122132367|sp|Q08DU1.1|UTP23_BOVIN(RecName: Full=rRNA-processing protein UTP23 homolog)
Phn-m0203-3p	TRINITY_DN92463_c4_g1	0	1	22	1423	1444	CACGAAGAGCAGATCTCATAGC	||||||||||||||||||||||	GTGCTTCTCGTCTAGAGTATCG	COG5031(H:Coenzyme transport and metabolism )		COG5031(Component of the coenzyme Q biosynthetic pathway. May play a role in organizing a multi-subunit COQ enzyme complex required for coenzyme Q biosynthesis. Required for steady-state levels of other COQ polypeptides (By similarity))		K18586	COQ4		PF05019.10(Coq4:Coenzyme Q (ubiquinone) biosynthesis protein Coq4)	GO:0031314(cellular_component:extrinsic component of mitochondrial inner membrane); GO:0006744(biological_process:ubiquinone biosynthetic process)	gi|731339095|ref|XP_010680668.1|( PREDICTED: ubiquinone biosynthesis protein COQ4 homolog, mitochondrial [Beta vulgaris subsp. vulgaris])	gi|24211606|sp|Q9ZPR0.1|COQ4_ARATH(RecName: Full=Ubiquinone biosynthesis protein COQ4 homolog, mitochondrial; AltName: Full=Coenzyme Q biosynthesis protein 4 homolog; Flags: Precursor)
Phn-m0203-3p	TRINITY_DN92463_c4_g3	0	1	22	616	637	CACGAAGAGCAGATCTCATAGC	||||||||||||||||||||||	GTGCTTCTCGTCTAGAGTATCG					K18586	COQ4			GO:0031314(cellular_component:extrinsic component of mitochondrial inner membrane); GO:0006744(biological_process:ubiquinone biosynthetic process)	gi|702275930|ref|XP_010044391.1|( PREDICTED: ubiquinone biosynthesis protein COQ4 homolog, mitochondrial isoform X2 [Eucalyptus grandis])	gi|24211606|sp|Q9ZPR0.1|COQ4_ARATH(RecName: Full=Ubiquinone biosynthesis protein COQ4 homolog, mitochondrial; AltName: Full=Coenzyme Q biosynthesis protein 4 homolog; Flags: Precursor)
Phn-m0216-5p	TRINITY_DN87548_c6_g2	0	1	24	1410	1433	GTTGTATGTATATAACGGGGTTTT	||||||||||||||||||||||||	CAACATACATATATTGCCCCAAAA								PF13923.3(zf-C3HC4_2:Zinc finger, C3HC4 type (RING finger)); PF13639.3(zf-RING_2:Ring finger domain); PF00097.22(zf-C3HC4:Zinc finger, C3HC4 type (RING finger)); PF13445.3(zf-RING_UBOX:RING-type zinc-finger); PF14634.3(zf-RING_5:zinc-RING finger domain); PF13920.3(zf-C3HC4_3:Zinc finger, C3HC4 type (RING finger)); PF15227.3(zf-C3HC4_4:zinc finger of C3HC4-type, RING); PF14447.3(Prok-RING_4:Prokar…		gi|698487455|ref|XP_009790387.1|( PREDICTED: E3 ubiquitin-protein ligase RNF4-like [Nicotiana sylvestris])	gi|18202358|sp|P78317.1|RNF4_HUMAN(RecName: Full=E3 ubiquitin-protein ligase RNF4; AltName: Full=RING finger protein 4; AltName: Full=Small nuclear ring finger protein; Short=Protein SNURF)
Phn-m0223-5p	TRINITY_DN92852_c0_g1	0	1	21	2088	2108	CCAAATTGCAATTCATGCCTT	|||||||||||||||||||||	GGTTTAACGTTAAGTACGGAA					K17637	EXOC2, SEC5		PF03468.11(XS:XS domain)	GO:0000145(cellular_component:exocyst); GO:0006893(biological_process:Golgi to plasma membrane transport)	gi|902158936|gb|KNA06277.1|( hypothetical protein SOVF_182640 [Spinacia oleracea])	gi|565830538|sp|F4HWE6.1|SEC5B_ARATH(RecName: Full=Exocyst complex component SEC5B; Short=AtSec5b)
Phn-m0226-3p	TRINITY_DN92852_c0_g1	0	1	24	2051	2074	ATAGGTCTGAATTGCAATTTGGCT	||||||||||||||||||||||||	TATCCAGACTTAACGTTAAACCGA					K17637	EXOC2, SEC5		PF03468.11(XS:XS domain)	GO:0000145(cellular_component:exocyst); GO:0006893(biological_process:Golgi to plasma membrane transport)	gi|902158936|gb|KNA06277.1|( hypothetical protein SOVF_182640 [Spinacia oleracea])	gi|565830538|sp|F4HWE6.1|SEC5B_ARATH(RecName: Full=Exocyst complex component SEC5B; Short=AtSec5b)
Phn-m0226-5p	TRINITY_DN92852_c0_g1	0	1	21	2088	2108	CCAAATTGCAATTCATGCCTT	|||||||||||||||||||||	GGTTTAACGTTAAGTACGGAA					K17637	EXOC2, SEC5		PF03468.11(XS:XS domain)	GO:0000145(cellular_component:exocyst); GO:0006893(biological_process:Golgi to plasma membrane transport)	gi|902158936|gb|KNA06277.1|( hypothetical protein SOVF_182640 [Spinacia oleracea])	gi|565830538|sp|F4HWE6.1|SEC5B_ARATH(RecName: Full=Exocyst complex component SEC5B; Short=AtSec5b)
Phn-m0230-5p	TRINITY_DN93227_c3_g2	0	1	22	627	648	GAGAAGTCCTCTGATCAGCATC	||||||||||||||||||||||	CTCTTCAGGAGACTAGTCGTAG								PF00078.24(RVT_1:Reverse transcriptase (RNA-dependent DNA polymerase)); PF13456.3(RVT_3:Reverse transcriptase-like); PF00665.23(rve:Integrase core domain); PF00075.21(RNase_H:RNase H)		gi|731345230|ref|XP_010683813.1|( PREDICTED: uncharacterized protein LOC104898425 [Beta vulgaris subsp. vulgaris])	gi|146291076|sp|Q7LHG5.2|YI31B_YEAST(RecName: Full=Transposon Ty3-I Gag-Pol polyprotein; AltName: Full=Gag3-Pol3; AltName: Full=Transposon Ty3-2 TYA-TYB polyprotein; Contains: RecName: Full=Capsid protein; Short=CA; AltName: Full=p24; Contains: RecName: Full=Spacer peptide p3; Contains: RecName: Full=Nucleocapsid protein p11; Short=NC; Contains: RecName: Full=Ty3 protease; Short=PR; AltName: Full…
Phn-m0231-5p	TRINITY_DN93227_c3_g2	0	1	22	627	648	GAGAAGTCCTCTGATCAGCATC	||||||||||||||||||||||	CTCTTCAGGAGACTAGTCGTAG								PF00078.24(RVT_1:Reverse transcriptase (RNA-dependent DNA polymerase)); PF13456.3(RVT_3:Reverse transcriptase-like); PF00665.23(rve:Integrase core domain); PF00075.21(RNase_H:RNase H)		gi|731345230|ref|XP_010683813.1|( PREDICTED: uncharacterized protein LOC104898425 [Beta vulgaris subsp. vulgaris])	gi|146291076|sp|Q7LHG5.2|YI31B_YEAST(RecName: Full=Transposon Ty3-I Gag-Pol polyprotein; AltName: Full=Gag3-Pol3; AltName: Full=Transposon Ty3-2 TYA-TYB polyprotein; Contains: RecName: Full=Capsid protein; Short=CA; AltName: Full=p24; Contains: RecName: Full=Spacer peptide p3; Contains: RecName: Full=Nucleocapsid protein p11; Short=NC; Contains: RecName: Full=Ty3 protease; Short=PR; AltName: Full…
Phn-m0233-5p	TRINITY_DN90792_c0_g1	0	1	22	71	92	TTCAATGAACAAGAGAGAGACT	||||||||||||||||||||||	AAGTTACTTGTTCTCTCTCTGA	COG0270(L:Replication, recombination and repair )		COG0270(Cytosine-specific methyltransferase)		K15336	TRDMT1, DNMT2		PF00145.14(DNA_methylase:C-5 cytosine-specific DNA methylase)	GO:0008168(molecular_function:methyltransferase activity); GO:0032259(biological_process:methylation)	gi|902229592|gb|KNA21545.1|( hypothetical protein SOVF_042200 [Spinacia oleracea])	gi|115311703|sp|Q4G073.1|TRDMT_RAT(RecName: Full=tRNA (cytosine(38)-C(5))-methyltransferase; AltName: Full=DNA (cytosine-5)-methyltransferase-like protein 2; Short=Dnmt2)
Phn-m0234-3p	TRINITY_DN90778_c0_g4	0	1	24	290	313	ACTGAATTTCAACGTTATCCCTTT	||||||||||||||||||||||||	TGACTTAAAGTTGCAATAGGGAAA					K18045	SIW14, OCA3		PF03162.10(Y_phosphatase2:Tyrosine phosphatase family); PF13350.3(Y_phosphatase3:Tyrosine phosphatase family); PF00102.24(Y_phosphatase:Protein-tyrosine phosphatase); PF00782.17(DSPc:Dual specificity phosphatase, catalytic domain)	GO:0004725(molecular_function:protein tyrosine phosphatase activity); GO:0035335(biological_process:peptidyl-tyrosine dephosphorylation)	gi|731355010|ref|XP_010688912.1|( PREDICTED: probable tyrosine-protein phosphatase At1g05000 isoform X2 [Beta vulgaris subsp. vulgaris])	gi|73921030|sp|Q9ZVN4.1|Y1500_ARATH(RecName: Full=Probable tyrosine-protein phosphatase At1g05000)
Phn-m0235-3p	TRINITY_DN90778_c0_g4	0	1	24	290	313	ACTGAATTTCAACGTTATCCCTTT	||||||||||||||||||||||||	TGACTTAAAGTTGCAATAGGGAAA					K18045	SIW14, OCA3		PF03162.10(Y_phosphatase2:Tyrosine phosphatase family); PF13350.3(Y_phosphatase3:Tyrosine phosphatase family); PF00102.24(Y_phosphatase:Protein-tyrosine phosphatase); PF00782.17(DSPc:Dual specificity phosphatase, catalytic domain)	GO:0004725(molecular_function:protein tyrosine phosphatase activity); GO:0035335(biological_process:peptidyl-tyrosine dephosphorylation)	gi|731355010|ref|XP_010688912.1|( PREDICTED: probable tyrosine-protein phosphatase At1g05000 isoform X2 [Beta vulgaris subsp. vulgaris])	gi|73921030|sp|Q9ZVN4.1|Y1500_ARATH(RecName: Full=Probable tyrosine-protein phosphatase At1g05000)
Phn-m0243-5p	TRINITY_DN93113_c3_g2	0	1	24	2268	2291	ATCCATGCAAAGAACTCCACAGTT	||||||||||||||||||||||||	TAGGTACGTTTCTTGAGGTGTCAA		NOG137892(S:Function unknown )		NOG137892()						gi|902170933|gb|KNA07922.1|( hypothetical protein SOVF_167350 [Spinacia oleracea])	gi|34395875|sp|Q84MC0.1|UGPI4_ARATH(RecName: Full=Uncharacterized GPI-anchored protein At3g06035; Flags: Precursor)
Phn-m0248-3p	TRINITY_DN89693_c3_g1	0	1	20	1003	1022	TCGGGGGGGTGGGTGCAGGG	||||||||||||||||||||	AGCCCCCCCACCCACGTCCC								PF00223.16(PsaA_PsaB:Photosystem I psaA/psaB protein)	GO:0009507(cellular_component:chloroplast)	gi|225544167|ref|YP_002720156.1|( ORF126 [Jatropha curcas])	gi|75117189|sp|Q68RU5.1|YCF15_PANGI(RecName: Full=Putative uncharacterized protein ycf15 (chloroplast) [Panax ginseng])
Phn-m0252-3p	TRINITY_DN90621_c1_g3	0	1	23	353	375	TTGAGAATGATTCTGATCTAGTT	|||||||||||||||||||||||	AACTCTTACTAAGACTAGATCAA		NOG154618(R:General function prediction only )		NOG154618()				PF00004.26(AAA:ATPase family associated with various cellular activities (AAA))	GO:0005524(molecular_function:ATP binding); GO:0009570(cellular_component:chloroplast stroma); GO:0016021(cellular_component:integral component of membrane)	gi|340842661|gb|AEK78288.1|( hypothetical chloroplast RF2, partial (plastid) [Stellaria media])	gi|68053014|sp|Q589A6.1|YCF2_SILLA(RecName: Full=Protein Ycf2)
Phn-m0257-5p	TRINITY_DN92992_c0_g1	0	1	21	496	516	GTAAATCAACGAACAAATCCT	|||||||||||||||||||||	CATTTAGTTGCTTGTTTAGGA		NOG11101(U:Intracellular trafficking, secretion, and vesicular transport )		NOG11101(RFT1 homolog (S. cerevisiae))	K06316	RFT1		PF04506.10(Rft-1:Rft protein); PF01943.14(Polysacc_synt:Polysaccharide biosynthesis protein); PF14667.3(Polysacc_synt_C:Polysaccharide biosynthesis C-terminal domain); PF03595.14(SLAC1:Voltage-dependent anion channel)	GO:0005789(cellular_component:endoplasmic reticulum membrane); GO:0005319(molecular_function:lipid transporter activity); GO:0016021(cellular_component:integral component of membrane); GO:0034203(biological_process:glycolipid translocation)	gi|902181746|gb|KNA09795.1|( hypothetical protein SOVF_150180 [Spinacia oleracea])	gi|123885239|sp|Q0D2E8.1|RFT1_XENTR(RecName: Full=Protein RFT1 homolog)
Phn-m0272-3p	TRINITY_DN92675_c0_g2	0	1	22	54	75	TATGGGAAAAGCTTGTGCCACT	||||||||||||||||||||||	ATACCCTTTTCGAACACGGTGA					K00799	GST, gst	map00480(Glutathione metabolism)	PF02798.17(GST_N:Glutathione S-transferase, N-terminal domain); PF13417.3(GST_N_3:Glutathione S-transferase, N-terminal domain); PF13409.3(GST_N_2:Glutathione S-transferase, N-terminal domain); PF00462.21(Glutaredoxin:Glutaredoxin); PF17172.1(GST_N_4:Glutathione S-transferase N-terminal domain)		gi|89953432|gb|ABD83308.1|( Fgenesh protein 133 [Beta vulgaris])	gi|417148|sp|P32110.1|GSTX6_SOYBN(RecName: Full=Probable glutathione S-transferase; AltName: Full=G2-4; AltName: Full=Heat shock protein 26A)
Phn-m0274-3p	TRINITY_DN90695_c2_g1	0	1	22	1476	1497	TACTGGGAATCGATGATGCATC	||||||||||||||||||||||	ATGACCCTTAGCTACTACGTAG								PF13041.3(PPR_2:PPR repeat family); PF01535.17(PPR:PPR repeat); PF12854.4(PPR_1:PPR repeat); PF13812.3(PPR_3:Pentatricopeptide repeat domain); PF17177.1(PPR_long:Pentacotripeptide-repeat region of PROPR)		gi|902231760|gb|KNA22390.1|( hypothetical protein SOVF_034390 [Spinacia oleracea])	gi|75264589|sp|Q9M2C8.1|PP291_ARATH(RecName: Full=Pentatricopeptide repeat-containing protein At3g61360)
Phn-m0274-5p	TRINITY_DN90695_c2_g1	0	1	22	1531	1552	TTATGTCACCAGATTCTTTAAA	||||||||||||||||||||||	AATACAGTGGTCTAAGAAATTT								PF13041.3(PPR_2:PPR repeat family); PF01535.17(PPR:PPR repeat); PF12854.4(PPR_1:PPR repeat); PF13812.3(PPR_3:Pentatricopeptide repeat domain); PF17177.1(PPR_long:Pentacotripeptide-repeat region of PROPR)		gi|902231760|gb|KNA22390.1|( hypothetical protein SOVF_034390 [Spinacia oleracea])	gi|75264589|sp|Q9M2C8.1|PP291_ARATH(RecName: Full=Pentatricopeptide repeat-containing protein At3g61360)
Phn-m0275-3p	TRINITY_DN93279_c3_g1	0	1	24	1559	1582	ATGCCGGAGATGTTGACTCGAGAA	||||||||||||||||||||||||	TACGGCCTCTACAACTGAGCTCTT					K03006	RPB1, POLR2A	map00240(Pyrimidine metabolism); map03020(RNA polymerase); map00230(Purine metabolism)	PF07727.11(RVT_2:Reverse transcriptase (RNA-dependent DNA polymerase)); PF00665.23(rve:Integrase core domain); PF13976.3(gag_pre-integrs:GAG-pre-integrase domain); PF13917.3(zf-CCHC_3:Zinc knuckle); PF13683.3(rve_3:Integrase core domain); PF00098.20(zf-CCHC:Zinc knuckle); PF14223.3(Retrotran_gag_2:gag-polypeptide of LTR copia-type)	GO:0003676(molecular_function:nucleic acid binding); GO:0008270(molecular_function:zinc ion binding); GO:0015074(biological_process:DNA integration)	gi|133711804|gb|ABO36622.1|( copia LTR rider [Solanum lycopersicum])	gi|130582|sp|P10978.1|POLX_TOBAC(RecName: Full=Retrovirus-related Pol polyprotein from transposon TNT 1-94; Includes: RecName: Full=Protease; Includes: RecName: Full=Reverse transcriptase; Includes: RecName: Full=Endonuclease)
Phn-m0277-3p	TRINITY_DN91435_c0_g3	0	1	24	51	74	ATTTCCTTCACTTATCACTTGTGG	||||||||||||||||||||||||	TAAAGGAAGTGAATAGTGAACACC									GO:0005488(molecular_function:binding)	gi|147863683|emb|CAN81525.1|( hypothetical protein VITISV_033879 [Vitis vinifera])	gi|13124684|sp|P04146.3|COPIA_DROME(RecName: Full=Copia protein; AltName: Full=Gag-int-pol protein; Contains: RecName: Full=Copia VLP protein; Contains: RecName: Full=Copia protease)
Phn-m0278-3p	TRINITY_DN84567_c1_g1	0	1	22	127	148	TGGACCCGATCAAATACTTGTT	||||||||||||||||||||||	ACCTGGGCTAGTTTATGAACAA										gi|955363117|ref|XP_003544290.2|( PREDICTED: uncharacterized protein LOC100815788 [Glycine max])	gi|130405|sp|P04323.1|POL3_DROME(RecName: Full=Retrovirus-related Pol polyprotein from transposon 17.6; Includes: RecName: Full=Protease; Includes: RecName: Full=Reverse transcriptase; Includes: RecName: Full=Endonuclease)
Phn-m0278-3p	TRINITY_DN84567_c1_g2	0	1	22	54	75	TGGACCCGATCAAATACTTGTT	||||||||||||||||||||||	ACCTGGGCTAGTTTATGAACAA								PF03635.14(Vps35:Vacuolar protein sorting-associated protein 35)	GO:0016787(molecular_function:hydrolase activity); GO:0043170(biological_process:macromolecule metabolic process); GO:0044238(biological_process:primary metabolic process)	gi|34761721|gb|AAQ82033.1|( gag/pol polyprotein [Pisum sativum])	gi|130405|sp|P04323.1|POL3_DROME(RecName: Full=Retrovirus-related Pol polyprotein from transposon 17.6; Includes: RecName: Full=Protease; Includes: RecName: Full=Reverse transcriptase; Includes: RecName: Full=Endonuclease)
Phn-m0284-3p	TRINITY_DN92664_c2_g3	0	1	23	542	564	TAATTGAATGACTGCGTTGAGCA	|||||||||||||||||||||||	ATTAACTTACTGACGCAACTCGT		NOG11419(R:General function prediction only )		NOG11419(solute carrier family 29 (nucleoside transporters), member)	K15014	SLC29A1_2_3, ENT1_2_3		PF01733.15(Nucleoside_tran:Nucleoside transporter)	GO:0016021(cellular_component:integral component of membrane); GO:1901642(biological_process:nucleoside transmembrane transport); GO:0005337(molecular_function:nucleoside transmembrane transporter activity)	gi|902205323|gb|KNA15145.1|( hypothetical protein SOVF_100880 [Spinacia oleracea])	gi|75181688|sp|Q9M0Y3.1|ENT3_ARATH(RecName: Full=Equilibrative nucleotide transporter 3; Short=AtENT3; AltName: Full=Nucleoside transporter ENT3; AltName: Full=Protein FLUOROURIDINE RESISTANT 1)
Phn-m0295-3p	TRINITY_DN92092_c2_g1	0	1	24	1142	1165	ATCGATGTGTCATAAGATATGAGA	||||||||||||||||||||||||	TAGCTACACAGTATTCTATACTCT								PF00295.14(Glyco_hydro_28:Glycosyl hydrolases family 28); PF13229.3(Beta_helix:Right handed beta helix region)	GO:0005975(biological_process:carbohydrate metabolic process); GO:0005576(cellular_component:extracellular region); GO:0004650(molecular_function:polygalacturonase activity); GO:0071555(biological_process:cell wall organization)	gi|731321957|ref|XP_010671628.1|( PREDICTED: probable polygalacturonase [Beta vulgaris subsp. vulgaris])	gi|223635599|sp|A7PZL3.1|PGLR_VITVI(RecName: Full=Probable polygalacturonase; Short=PG; AltName: Full=Pectinase)
Phn-m0013-3p	TRINITY_DN91686_c0_g1	0.2	1	22	1926	1947	ACGTAAACAAATGACTGGAACG	|||||||||||||||||:||||	TGCATTTGTTTACTGACTTTGC								PF13041.3(PPR_2:PPR repeat family); PF01535.17(PPR:PPR repeat); PF13812.3(PPR_3:Pentatricopeptide repeat domain); PF12854.4(PPR_1:PPR repeat)		gi|902185676|gb|KNA10536.1|( hypothetical protein SOVF_143470 [Spinacia oleracea])	gi|218546757|sp|Q9M2A1.2|PP263_ARATH(RecName: Full=Pentatricopeptide repeat-containing protein At3g42630)
Phn-m0131-5p	TRINITY_DN90610_c2_g3	0.2	1	24	97	120	ATCAAAGAAAACAATATTATTTAT	|||||||||||||||||:||||||	TAGTTTCTTTTGTTATAGTAAATA					K12655	OTUD5, DUBA				gi|731348266|ref|XP_010685408.1|( PREDICTED: OTU domain-containing protein 5-B [Beta vulgaris subsp. vulgaris])	gi|126253667|sp|Q3U2S4.2|OTUD5_MOUSE(RecName: Full=OTU domain-containing protein 5; AltName: Full=Deubiquitinating enzyme A; Short=DUBA)
Phn-m0256-5p	TRINITY_DN89242_c4_g1	0.2	1	23	2154	2176	GGATATCCAAAGTGTTTGAAACT	:||||||||||||||||||||||	TCTATAGGTTTCACAAACTTTGA	COG2124(Q:Secondary metabolites biosynthesis, transport and catabolism )		COG2124(Cytochrome p450)		K09754	CYP98A, C3'H	map00941(Flavonoid biosynthesis); map00940(Phenylpropanoid biosynthesis); map00945(Stilbenoid, diarylheptanoid and gingerol biosynthesis)	PF00067.19(p450:Cytochrome P450)	GO:0020037(molecular_function:heme binding); GO:0016705(molecular_function:oxidoreductase activity, acting on paired donors, with incorporation or reduction of molecular oxygen); GO:0004497(molecular_function:monooxygenase activity); GO:0005506(molecular_function:iron ion binding); GO:0055114(biological_process:oxidation-reduction process)	gi|902233500|gb|KNA23079.1|( hypothetical protein SOVF_027840 [Spinacia oleracea])	gi|5915858|sp|O48922.1|C98A2_SOYBN(RecName: Full=Cytochrome P450 98A2)
Phn-m0011-3p	TRINITY_DN85192_c0_g2	0.5	1	22	2676	2697	ACGTAAACAACATGATATATCG	|||||||||||||||:||||||	TGCATTTGTTGTACTGTATAGC	COG1131(V:Defense mechanisms )		COG1131((ABC) transporter)					PF01061.21(ABC2_membrane:ABC-2 type transporter); PF00005.24(ABC_tran:ABC transporter); PF13555.3(AAA_29:P-loop containing region of AAA domain); PF13304.3(AAA_21:AAA domain, putative AbiEii toxin, Type IV TA system); PF13191.3(AAA_16:AAA ATPase domain); PF03193.13(DUF258:Protein of unknown function, DUF258)	GO:0016021(cellular_component:integral component of membrane); GO:0016887(molecular_function:ATPase activity); GO:0005524(molecular_function:ATP binding)	gi|902221136|gb|KNA18805.1|( hypothetical protein SOVF_067510 [Spinacia oleracea])	gi|109896158|sp|Q8RWI9.2|AB15G_ARATH(RecName: Full=ABC transporter G family member 15; Short=ABC transporter ABCG.15; Short=AtABCG15; AltName: Full=White-brown complex homolog protein 15; Short=AtWBC15; AltName: Full=White-brown complex homolog protein 22; Short=AtWBC22)
Phn-m0011-3p	TRINITY_DN87378_c4_g1	0.5	1	22	1344	1365	ACGTAAACAACATGATATATCG	|||||||||||||:||||||||	TGCATTTGTTGTATTATATAGC	COG2039(O:Posttranslational modification, protein turnover, chaperones )		COG2039(Removes 5-oxoproline from various penultimate amino acid residues except L-proline (By similarity))		K01304	pcp		PF01470.14(Peptidase_C15:Pyroglutamyl peptidase)	GO:0005829(cellular_component:cytosol); GO:0016920(molecular_function:pyroglutamyl-peptidase activity); GO:0006508(biological_process:proteolysis)	gi|731327468|ref|XP_010674536.1|( PREDICTED: pyroglutamyl-peptidase 1-like protein [Beta vulgaris subsp. vulgaris])	gi|3914272|sp|O07883.1|PCP_THELN(RecName: Full=Pyrrolidone-carboxylate peptidase; AltName: Full=5-oxoprolyl-peptidase; AltName: Full=Pyroglutamyl-peptidase I; Short=PGP-I)
Phn-m0013-3p	TRINITY_DN87191_c0_g1	0.5	1	22	1782	1803	ACGTAAACAAATGACTGGAACG	||||||||||||||||:|||||	TGCATTTGTTTACTGATCTTGC								PF01494.16(FAD_binding_3:FAD binding domain)	GO:0071949(molecular_function:FAD binding); GO:0016491(molecular_function:oxidoreductase activity); GO:0055114(biological_process:oxidation-reduction process)	gi|902213171|gb|KNA17193.1|( hypothetical protein SOVF_082360 [Spinacia oleracea])	gi|81392101|sp|Q6F6Y2.1|HPXO_ACIAD(RecName: Full=FAD-dependent urate hydroxylase; AltName: Full=Flavoprotein urate hydroxylase)
Phn-m0024-3p	TRINITY_DN90343_c1_g6	0.5	1	21	350	370	TTTTGAACAATGTATACAACT	|||||||||||||||||||*|	AAAACTTGTTACATATGTTAA								PF00514.20(Arm:Armadillo/beta-catenin-like repeat); PF04564.12(U-box:U-box domain); PF04826.10(Arm_2:Armadillo-like)	GO:0044424(cellular_component:intracellular part)	gi|641841563|gb|KDO60475.1|( hypothetical protein CISIN_1g004078mg [Citrus sinensis])	gi|172045742|sp|Q8GWV5.2|PUB3_ARATH(RecName: Full=U-box domain-containing protein 3; AltName: Full=Plant U-box protein 3)
Phn-m0049-5p	TRINITY_DN87918_c1_g3	0.5	1	24	1897	1920	ATCCGTTGGATATGGACTGGATCT	||||||||||||||||||||||*|	TAGGCAACCTATACCTGACCTAAA					K20888	MUR3		PF03016.12(Exostosin:Exostosin family)		gi|731349769|ref|XP_010686167.1|( PREDICTED: xyloglucan galactosyltransferase KATAMARI1 homolog [Beta vulgaris subsp. vulgaris])	gi|68052329|sp|Q7XJ98.1|MUR3_ARATH(RecName: Full=Xyloglucan galactosyltransferase MUR3; AltName: Full=Protein KATAMARI; AltName: Full=Protein MURUS 3; Short=AtMUR3; AltName: Full=Protein SHORT ROOT IN SALT MEDIUM 3)
Phn-m0051-5p	TRINITY_DN86988_c0_g5	0.5	1	21	1917	1937	GGGCAGTTCTTCTTTGGCAGA	||:||||||||||||||||||	CCTGTCAAGAAGAAACCGTCT								PF10914.5(DUF2781:Protein of unknown function (DUF2781))	GO:0016020(cellular_component:membrane)	gi|902152673|gb|KNA05625.1|( hypothetical protein SOVF_188630 [Spinacia oleracea])	gi|82182937|sp|Q6DFQ5.1|TMM97_XENTR(RecName: Full=Transmembrane protein 97)
Phn-m0052-5p	TRINITY_DN86988_c0_g5	0.5	1	21	1917	1937	GGGCAGTTCTTCTTTGGCAGA	||:||||||||||||||||||	CCTGTCAAGAAGAAACCGTCT								PF10914.5(DUF2781:Protein of unknown function (DUF2781))	GO:0016020(cellular_component:membrane)	gi|902152673|gb|KNA05625.1|( hypothetical protein SOVF_188630 [Spinacia oleracea])	gi|82182937|sp|Q6DFQ5.1|TMM97_XENTR(RecName: Full=Transmembrane protein 97)
Phn-m0053-3p	TRINITY_DN91305_c3_g1	0.5	1	24	1103	1126	AATAATGTTATATTTACGATCAAC	||:|||||||||||||||||||||	TTGTTACAATATAAATGCTAGTTG					K14488	SAUR	map04075(Plant hormone signal transduction)	PF02519.11(Auxin_inducible:Auxin responsive protein)	GO:0009733(biological_process:response to auxin)	gi|870843052|gb|KMS96319.1|( hypothetical protein BVRB_000330 [Beta vulgaris subsp. vulgaris])	gi|75216875|sp|Q9ZUZ3.1|SAU32_ARATH(RecName: Full=Auxin-responsive protein SAUR32; AltName: Full=Protein ABOLISHED APICAL HOOK MAINTENANCE 1; AltName: Full=Protein SMALL AUXIN UP RNA 32)
Phn-m0077-5p	TRINITY_DN85642_c1_g2	0.5	1	24	2530	2553	ATCGACGCAATCTTCACCTTGGGT	|||||||||||||||||*||||||	TAGCTGCGTTAGAAGTGAAACCCA		NOG24863(A:RNA processing and modification )		NOG24863(Survival motor neuron domain containing 1)	K12839	SMNDC1, SPF30	map03040(Spliceosome)	PF06003.9(SMN:Survival motor neuron protein (SMN)); PF00567.21(TUDOR:Tudor domain)	GO:0005737(cellular_component:cytoplasm); GO:0003723(molecular_function:RNA binding); GO:0006397(biological_process:mRNA processing); GO:0005634(cellular_component:nucleus)	gi|731341900|ref|XP_010682128.1|( PREDICTED: survival of motor neuron-related-splicing factor 30 [Beta vulgaris subsp. vulgaris])	gi|82182755|sp|Q6DEY1.1|SPF30_XENTR(RecName: Full=Survival of motor neuron-related-splicing factor 30; AltName: Full=Survival motor neuron domain-containing protein 1)
Phn-m0077-5p	TRINITY_DN86156_c6_g1	0.5	1	24	1098	1121	ATCGACGCAATCTTCACCTTGGGT	|||||||||||||||||||||*||	TAGCTGCGTTAGAAGTGGAACGCA								PF00849.19(PseudoU_synth_2:RNA pseudouridylate synthase)	GO:0003723(molecular_function:RNA binding); GO:0001522(biological_process:pseudouridine synthesis); GO:0009982(molecular_function:pseudouridine synthase activity)	gi|731318303|ref|XP_010669646.1|( PREDICTED: RNA pseudouridine synthase 5 [Beta vulgaris subsp. vulgaris])	gi|229891781|sp|Q5M721.2|PUS5_ARATH(RecName: Full=RNA pseudouridine synthase 5; AltName: Full=RNA pseudouridylate synthase 5; AltName: Full=RNA-uridine isomerase 5)
Phn-m0077-5p	TRINITY_DN86711_c2_g1	0.5	1	24	1898	1921	ATCGACGCAATCTTCACCTTGGGT	||||||||||:|||||||||||||	TAGCTGCGTTGGAAGTGGAACCCA	COG0153(G:Carbohydrate transport and metabolism )		COG0153(Catalyzes the transfer of the gamma-phosphate of ATP to D-galactose to form alpha-D-galactose-1-phosphate (Gal-1-P) (By similarity))		K18674	GALK2		PF10509.6(GalKase_gal_bdg:Galactokinase galactose-binding signature); PF00288.23(GHMP_kinases_N:GHMP kinases N terminal domain)	GO:0005737(cellular_component:cytoplasm); GO:0046835(biological_process:carbohydrate phosphorylation); GO:0005524(molecular_function:ATP binding); GO:0006012(biological_process:galactose metabolic process); GO:0004335(molecular_function:galactokinase activity); GO:0033858(molecular_function:N-acetylgalactosamine kinase activity)	gi|731320833|ref|XP_010671022.1|( PREDICTED: galactokinase [Beta vulgaris subsp. vulgaris])	gi|12643845|sp|Q9SEE5.2|GALK1_ARATH(RecName: Full=Galactokinase; AltName: Full=Galactose kinase)
Phn-m0077-5p	TRINITY_DN89502_c5_g1	0.5	1	24	89	112	ATCGACGCAATCTTCACCTTGGGT	|||||||||||||||||||||*||	TAGCTGCGTTAGAAGTGGAACGCA					K04650	NCOR1, N-CoR		PF15963.2(Myb_DNA-bind_7:Myb DNA-binding like); PF00249.28(Myb_DNA-binding:Myb-like DNA-binding domain)		gi|902187803|gb|KNA10993.1|( hypothetical protein SOVF_139300 isoform A [Spinacia oleracea])	gi|229891781|sp|Q5M721.2|PUS5_ARATH(RecName: Full=RNA pseudouridine synthase 5; AltName: Full=RNA pseudouridylate synthase 5; AltName: Full=RNA-uridine isomerase 5)
Phn-m0077-5p	TRINITY_DN92873_c1_g1	0.5	1	24	67	89	ATCGACGCAATCTTCACCTTGGGT	|||||||||||||||||*||||||	TAGCTGCGTTAGAAGTG-AACCCA					K06694	PSMD10		PF13637.3(Ank_4:Ankyrin repeats (many copies)); PF12796.4(Ank_2:Ankyrin repeats (3 copies)); PF13606.3(Ank_3:Ankyrin repeat); PF00023.27(Ank:Ankyrin repeat)		gi|729450681|ref|XP_010523483.1|( PREDICTED: 26S proteasome non-ATPase regulatory subunit 10 [Tarenaya hassleriana])	gi|123788195|sp|Q3UMT1.1|PP12C_MOUSE(RecName: Full=Protein phosphatase 1 regulatory subunit 12C; AltName: Full=Protein phosphatase 1 myosin-binding subunit of 85 kDa; Short=Protein phosphatase 1 myosin-binding subunit p85)
Phn-m0082-3p	TRINITY_DN89588_c6_g2	0.5	1	22	1367	1388	AACGTGAACAATCTGATGTATC	|||||:||||||||||||||||	TTGCATTTGTTAGACTACATAG					K00588	E2.1.1.104	map00940(Phenylpropanoid biosynthesis); map00941(Flavonoid biosynthesis); map00360(Phenylalanine metabolism); map00945(Stilbenoid, diarylheptanoid and gingerol biosynthesis)		GO:0008171(molecular_function:O-methyltransferase activity); GO:0032259(biological_process:methylation)	gi|902155639|gb|KNA05927.1|( hypothetical protein SOVF_185800 [Spinacia oleracea])	gi|510791478|sp|C7AE94.1|FAOMT_VITVI(RecName: Full=Flavonoid 3',5'-methyltransferase; AltName: Full=Anthocyanin-O-methyltransferase; Short=VvAOMT)
Phn-m0087-5p	TRINITY_DN86283_c1_g5	0.5	1	22	240	261	TAAGGCCATGTTCTTTTGGACT	||||||||||||||||||||*|	ATTCCGGTACAAGAAAACCTAA					K07904	RAB11A	map04144(Endocytosis)			gi|8778562|gb|AAF79570.1|AC022464_28(AC022464_28 F22G5.24 [Arabidopsis thaliana])	gi|3024528|sp|Q39434.1|RB2BV_BETVU(RecName: Full=Ras-related protein Rab2BV)
Phn-m0087-5p	TRINITY_DN91433_c4_g7	0.5	1	22	67	88	TAAGGCCATGTTCTTTTGGACT	*|||||||||||||||||||||	CTTCCGGTACAAGAAAACCTGA					K12836	U2AF1	map03040(Spliceosome)	PF00642.21(zf-CCCH:Zinc finger C-x8-C-x5-C-x3-H type (and similar))	GO:0046872(molecular_function:metal ion binding); GO:0089701(cellular_component:U2AF); GO:0003723(molecular_function:RNA binding); GO:0000398(biological_process:mRNA splicing, via spliceosome); GO:0000166(molecular_function:nucleotide binding)	gi|743796511|ref|XP_011005647.1|( PREDICTED: splicing factor U2af small subunit B-like [Populus euphratica])	gi|75336807|sp|Q9S709.1|U2AFA_ARATH(RecName: Full=Splicing factor U2af small subunit A; AltName: Full=U2 auxiliary factor 35 kDa subunit A; AltName: Full=U2 small nuclear ribonucleoprotein auxiliary factor small subunit A; Short=U2 snRNP auxiliary factor small subunit A; AltName: Full=Zinc finger CCCH domain-containing protein 8; Short=AtC3H8)
Phn-m0087-5p	TRINITY_DN92237_c2_g1	0.5	1	22	1035	1056	TAAGGCCATGTTCTTTTGGACT	||||||||||||||||||*|||	ATTCCGGTACAAGAAAACATGA								PF01805.17(Surp:Surp module)		gi|731371944|ref|XP_010666197.1|( PREDICTED: protein suppressor of white apricot isoform X3 [Beta vulgaris subsp. vulgaris])	gi|353678157|sp|Q3USH5.2|SFSWA_MOUSE(RecName: Full=Splicing factor, suppressor of white-apricot homolog; AltName: Full=Splicing factor, arginine/serine-rich 8; AltName: Full=Suppressor of white apricot protein homolog)
Phn-m0090-3p	TRINITY_DN88890_c0_g1	0.5	1	24	44	67	AAGAGAATTACAGTCCAAAAGAAC	*|||||||||||||||||||||||	GTCTCTTAATGTCAGGTTTTCTTG								PF01062.18(Bestrophin:Bestrophin, RFP-TM, chloride channel)	GO:0016021(cellular_component:integral component of membrane)	gi|731311686|ref|XP_010670570.1|( PREDICTED: UPF0187 protein At3g61320, chloroplastic [Beta vulgaris subsp. vulgaris])	gi|20141056|sp|Q9M2D2.2|YU88_ARATH(RecName: Full=UPF0187 protein At3g61320, chloroplastic; Flags: Precursor)
Phn-m0094-5p	TRINITY_DN87225_c0_g3	0.5	1	23	112	134	ATTACACATAATTAGACAAGTTT	|:|||||||||||||||||||||	TGATGTGTATTAATCTGTTCAAA		NOG04537(R:General function prediction only )		NOG04537(Basic leucine zipper and W2)				PF02020.15(W2:eIF4-gamma/eIF5/eIF2-epsilon)		gi|731326292|ref|XP_010673945.1|( PREDICTED: basic leucine zipper and W2 domain-containing protein 2-like [Beta vulgaris subsp. vulgaris])	gi|81879488|sp|Q91VK1.1|BZW2_MOUSE(RecName: Full=Basic leucine zipper and W2 domain-containing protein 2 >gi|119371243|sp|Q2L4X1.1|BZW2_MUSMM RecName: Full=Basic leucine zipper and W2 domain-containing protein 2; AltName: Full=Brain development-related molecule 2)
Phn-m0098-3p	TRINITY_DN87225_c0_g3	0.5	1	24	142	165	ACCGTCGGTGTTTTACTTCATACC	||||||||:|||||||||||||||	TGGCAGCCGCAAAATGAAGTATGG		NOG04537(R:General function prediction only )		NOG04537(Basic leucine zipper and W2)				PF02020.15(W2:eIF4-gamma/eIF5/eIF2-epsilon)		gi|731326292|ref|XP_010673945.1|( PREDICTED: basic leucine zipper and W2 domain-containing protein 2-like [Beta vulgaris subsp. vulgaris])	gi|81879488|sp|Q91VK1.1|BZW2_MOUSE(RecName: Full=Basic leucine zipper and W2 domain-containing protein 2 >gi|119371243|sp|Q2L4X1.1|BZW2_MUSMM RecName: Full=Basic leucine zipper and W2 domain-containing protein 2; AltName: Full=Brain development-related molecule 2)
Phn-m0101-5p	TRINITY_DN86022_c0_g4	0.5	1	23	156	178	TGAAACCGTTGTATGCATACAAG	|:|||||||||||||||||||||	ATTTTGGCAACATACGTATGTTC	COG1233(Q:Secondary metabolites biosynthesis, transport and catabolism )		COG1233(phytoene)					PF01593.21(Amino_oxidase:Flavin containing amine oxidoreductase); PF13450.3(NAD_binding_8:NAD(P)-binding Rossmann-like domain); PF00890.21(FAD_binding_2:FAD binding domain); PF01266.21(DAO:FAD dependent oxidoreductase); PF00996.15(GDI:GDP dissociation inhibitor); PF03486.11(HI0933_like:HI0933-like protein); PF01494.16(FAD_binding_3:FAD binding domain); PF12831.4(FAD_oxidored:FAD dependent oxidore…	GO:0016491(molecular_function:oxidoreductase activity); GO:0055114(biological_process:oxidation-reduction process)	gi|902100020|gb|KNA03498.1|( hypothetical protein SOVF_208660 [Spinacia oleracea])	gi|90101585|sp|Q2VEX9.1|CRTSO_DAUCA(RecName: Full=Prolycopene isomerase, chloroplastic; Short=CrtISO; AltName: Full=Carotenoid isomerase; Flags: Precursor)
Phn-m0132-3p	TRINITY_DN85192_c0_g2	0.5	1	22	2678	2699	AAACGTAAACAACATGATGTAT	|||||||||||||||||::|||	TTTGCATTTGTTGTACTGTATA	COG1131(V:Defense mechanisms )		COG1131((ABC) transporter)					PF01061.21(ABC2_membrane:ABC-2 type transporter); PF00005.24(ABC_tran:ABC transporter); PF13555.3(AAA_29:P-loop containing region of AAA domain); PF13304.3(AAA_21:AAA domain, putative AbiEii toxin, Type IV TA system); PF13191.3(AAA_16:AAA ATPase domain); PF03193.13(DUF258:Protein of unknown function, DUF258)	GO:0016021(cellular_component:integral component of membrane); GO:0016887(molecular_function:ATPase activity); GO:0005524(molecular_function:ATP binding)	gi|902221136|gb|KNA18805.1|( hypothetical protein SOVF_067510 [Spinacia oleracea])	gi|109896158|sp|Q8RWI9.2|AB15G_ARATH(RecName: Full=ABC transporter G family member 15; Short=ABC transporter ABCG.15; Short=AtABCG15; AltName: Full=White-brown complex homolog protein 15; Short=AtWBC15; AltName: Full=White-brown complex homolog protein 22; Short=AtWBC22)
Phn-m0154-3p	TRINITY_DN88179_c3_g1	0.5	1	24	872	895	AATTTCAGTCCAAAATAACAGGGC	||||||||||||||||||||*|||	TTAAAGTCAGGTTTTATTGTACCG								PF03514.11(GRAS:GRAS domain family)	GO:0006351(biological_process:transcription, DNA-templated)	gi|291621301|dbj|BAI94488.1|( GRAS family transcription factor [Dianthus caryophyllus])	gi|73620050|sp|Q69VG1.1|CIGR1_ORYSJ(RecName: Full=Chitin-inducible gibberellin-responsive protein 1)
Phn-m0155-5p	TRINITY_DN89055_c0_g1	0.5	1	24	64	87	TTGGAAACAATCTCTTTGTGATAT	||||||||||:|||||||||||||	AACCTTTGTTGGAGAAACACTATA					K15102	SLC25A3, PHC, PIC				gi|976921435|gb|KVI06125.1|( hypothetical protein Ccrd_015523 [Cynara cardunculus var. scolymus])	gi|75309219|sp|Q9FMU6.1|MPCP3_ARATH(RecName: Full=Mitochondrial phosphate carrier protein 3, mitochondrial; AltName: Full=Mitochondrial phosphate transporter 3; Short=MPT3; AltName: Full=Phosphate transporter 3;1; Flags: Precursor)
Phn-m0196-3p	TRINITY_DN86041_c3_g1	0.5	1	24	143	166	AGGGTGTGTTTGGATAGACAAATT	||||||||||||||||||*|||||	TCCCACACAAACCTATCTATTTAA										gi|1012362520|gb|KYP73703.1|( Retrotransposable element Tf2, partial [Cajanus cajan])	gi|38258172|sp|Q8I7P9.1|POL5_DROME(RecName: Full=Retrovirus-related Pol polyprotein from transposon opus; Includes: RecName: Full=Protease; Includes: RecName: Full=Reverse transcriptase; Includes: RecName: Full=Endonuclease)
Phn-m0196-3p	TRINITY_DN88475_c2_g7	0.5	1	24	65	88	AGGGTGTGTTTGGATAGACAAATT	||||||||||||||||||||*|||	TCCCACACAAACCTATCTGTGTAA					K17255	GDI1_2				gi|326529099|dbj|BAK00943.1|( predicted protein [Hordeum vulgare subsp. vulgare])	gi|75098247|sp|O24653.1|GDI2_ARATH(RecName: Full=Guanosine nucleotide diphosphate dissociation inhibitor 2; Short=AtGDI2)
Phn-m0208-5p	TRINITY_DN90078_c3_g1	0.5	1	24	2012	2035	ATCATTGGGCTTGTTTTGGGGGGT	|||||:||||||||||||||||||	TAGTAGCCCGAACAAAACCCCCCA								PF00067.19(p450:Cytochrome P450)		gi|731350022|ref|XP_010686293.1|( PREDICTED: cytochrome P450 CYP82D47-like [Beta vulgaris subsp. vulgaris])	gi|75314129|sp|Q9SZ46.1|C82C4_ARATH(RecName: Full=Cytochrome P450 82C4)
Phn-m0222-5p	TRINITY_DN92852_c0_g1	0.5	1	21	2088	2108	CTAAATTGCAATTCATGCCTT	|:|||||||||||||||||||	GGTTTAACGTTAAGTACGGAA					K17637	EXOC2, SEC5		PF03468.11(XS:XS domain)	GO:0000145(cellular_component:exocyst); GO:0006893(biological_process:Golgi to plasma membrane transport)	gi|902158936|gb|KNA06277.1|( hypothetical protein SOVF_182640 [Spinacia oleracea])	gi|565830538|sp|F4HWE6.1|SEC5B_ARATH(RecName: Full=Exocyst complex component SEC5B; Short=AtSec5b)
Phn-m0224-5p	TRINITY_DN92852_c0_g1	0.5	1	21	2088	2108	CTAAATTGCAATTCATGCCTT	|:|||||||||||||||||||	GGTTTAACGTTAAGTACGGAA					K17637	EXOC2, SEC5		PF03468.11(XS:XS domain)	GO:0000145(cellular_component:exocyst); GO:0006893(biological_process:Golgi to plasma membrane transport)	gi|902158936|gb|KNA06277.1|( hypothetical protein SOVF_182640 [Spinacia oleracea])	gi|565830538|sp|F4HWE6.1|SEC5B_ARATH(RecName: Full=Exocyst complex component SEC5B; Short=AtSec5b)
Phn-m0225-5p	TRINITY_DN92852_c0_g1	0.5	1	21	2088	2108	CTAAATTGCAATTCATGCCTT	|:|||||||||||||||||||	GGTTTAACGTTAAGTACGGAA					K17637	EXOC2, SEC5		PF03468.11(XS:XS domain)	GO:0000145(cellular_component:exocyst); GO:0006893(biological_process:Golgi to plasma membrane transport)	gi|902158936|gb|KNA06277.1|( hypothetical protein SOVF_182640 [Spinacia oleracea])	gi|565830538|sp|F4HWE6.1|SEC5B_ARATH(RecName: Full=Exocyst complex component SEC5B; Short=AtSec5b)
Phn-m0256-5p	TRINITY_DN92129_c0_g2	0.5	1	23	3346	3368	GGATATCCAAAGTGTTTGAAACT	|||||||||||:|||||||||||	CCTATAGGTTTTACAAACTTTGA		NOG02583(S:Function unknown )		NOG02583(tubulin tyrosine ligase-like family, member 12)	K16609	TTLL12		PF03133.12(TTL:Tubulin-tyrosine ligase family)	GO:0006464(biological_process:cellular protein modification process)	gi|902196854|gb|KNA13239.1|( hypothetical protein SOVF_118480 [Spinacia oleracea])	gi|123787791|sp|Q3UDE2.1|TTL12_MOUSE(RecName: Full=Tubulin--tyrosine ligase-like protein 12)
Phn-m0279-3p	TRINITY_DN90773_c2_g1	0.5	1	23	245	268	TTGGGACACATGTTAGAA-AAACC	||||||||||||||||||*|||||	AACCCTGTGTACAATCTTTTTTGG					K19199	SETD3	map00310(Lysine degradation)	PF00856.25(SET:SET domain); PF09273.8(Rubis-subs-bind:Rubisco LSMT substrate-binding)		gi|902212077|gb|KNA16866.1|( hypothetical protein SOVF_084150 [Spinacia oleracea])	gi|17367341|sp|Q43088.1|RBCMT_PEA(RecName: Full=Ribulose-1,5 bisphosphate carboxylase/oxygenase large subunit N-methyltransferase, chloroplastic; AltName: Full=[Fructose-bisphosphate aldolase]-lysine N-methyltransferase; AltName: Full=[Ribulose-bisphosphate carboxylase]-lysine N-methyltransferase; Short=PsLSMT; Short=RuBisCO LSMT; Short=RuBisCO methyltransferase; Short=rbcMT; Flags: Precursor)
Phn-m0069-3p	TRINITY_DN90101_c3_g6	0.8	1	23	900	922	AAACAACCTGATGTATCGGAGGG	|||||||||||||||||:|||::	TTTGTTGGACTACATAGTCTCTT										gi|1023976459|gb|KZV19530.1|( hypothetical protein F511_06392 [Dorcoceras hygrometricum])	gi|75164879|sp|Q949X9.1|LPR2_ARATH(RecName: Full=Multicopper oxidase LPR2; AltName: Full=Protein LOW PHOSPHATE ROOT 2; Flags: Precursor)
Phn-m0081-3p	TRINITY_DN87874_c1_g4	0.8	1	24	4190	4213	GAATTGTTCTATCAGGAAAGCTGA	|||||||||||||||||||||*:|	CTTAACAAGATAGTCCTTTCGTTT					K15923	AXY8, FUC95A, afcA	map00511(Other glycan degradation)	PF00813.17(FliP:FliP family)	GO:0016021(cellular_component:integral component of membrane); GO:0004560(molecular_function:alpha-L-fucosidase activity)	gi|902162892|gb|KNA06754.1|( hypothetical protein SOVF_178130 [Spinacia oleracea])	gi|75245768|sp|Q8L7W8.1|FUCO2_ARATH(RecName: Full=Alpha-L-fucosidase 2; AltName: Full=Alpha-1,2-fucosidase 2; AltName: Full=Alpha-L-fucosidase 95A; Short=AtFuc95A; AltName: Full=Alpha-L-fucoside fucohydrolase 2; AltName: Full=Protein ALTERED XYLOGLUCAN 8; Flags: Precursor)
Phn-m0106-5p	TRINITY_DN89217_c0_g8	0.8	1	22	599	620	GGGAATATTGTTTTAATGGATG	:||||||||:||||||||||||	TCCTTATAATAAAATTACCTAC										gi|729293914|ref|XP_010534673.1|( PREDICTED: WAT1-related protein At1g21890 isoform X1 [Tarenaya hassleriana])	gi|460425444|sp|F4HZQ7.1|WTR5_ARATH(RecName: Full=WAT1-related protein At1g21890)
Phn-m0107-3p	TRINITY_DN86382_c0_g1	0.8	1	24	146	169	AATTAAACGTAAACAATCTGATGT	|||:|||||||||||||||:||||	TTAGTTTGCATTTGTTAGATTACA								PF05705.11(DUF829:Eukaryotic protein of unknown function (DUF829))		gi|902203607|gb|KNA14614.1|( hypothetical protein SOVF_105800 [Spinacia oleracea])	gi|74758243|sp|Q6P2H8.1|TMM53_HUMAN(RecName: Full=Transmembrane protein 53)
Phn-m0108-3p	TRINITY_DN86382_c0_g1	0.8	1	24	146	169	AATTAAACGTAAACAATCTGATGT	|||:|||||||||||||||:||||	TTAGTTTGCATTTGTTAGATTACA								PF05705.11(DUF829:Eukaryotic protein of unknown function (DUF829))		gi|902203607|gb|KNA14614.1|( hypothetical protein SOVF_105800 [Spinacia oleracea])	gi|74758243|sp|Q6P2H8.1|TMM53_HUMAN(RecName: Full=Transmembrane protein 53)
Phn-m0132-3p	TRINITY_DN87378_c4_g1	0.8	1	22	1346	1367	AAACGTAAACAACATGATGTAT	|||||||||||||||:||:|||	TTTGCATTTGTTGTATTATATA	COG2039(O:Posttranslational modification, protein turnover, chaperones )		COG2039(Removes 5-oxoproline from various penultimate amino acid residues except L-proline (By similarity))		K01304	pcp		PF01470.14(Peptidase_C15:Pyroglutamyl peptidase)	GO:0005829(cellular_component:cytosol); GO:0016920(molecular_function:pyroglutamyl-peptidase activity); GO:0006508(biological_process:proteolysis)	gi|731327468|ref|XP_010674536.1|( PREDICTED: pyroglutamyl-peptidase 1-like protein [Beta vulgaris subsp. vulgaris])	gi|3914272|sp|O07883.1|PCP_THELN(RecName: Full=Pyrrolidone-carboxylate peptidase; AltName: Full=5-oxoprolyl-peptidase; AltName: Full=Pyroglutamyl-peptidase I; Short=PGP-I)
Phn-m0138-3p	TRINITY_DN85693_c0_g1	0.8	1	24	219	242	ATGTGAGTGGGTGTCGCCGAGACT	||||||||||||||||||||:|*|	TACACTCACCCACAGCGGCTTTAA					K18878	UPA20	map04626(Plant-pathogen interaction)			gi|731334657|ref|XP_010678331.1|( PREDICTED: transcription factor bHLH137 isoform X2 [Beta vulgaris subsp. vulgaris])	gi|75305763|sp|Q93W88.1|BH137_ARATH(RecName: Full=Transcription factor bHLH137; AltName: Full=Basic helix-loop-helix protein 137; Short=AtbHLH137; Short=bHLH 137; AltName: Full=Transcription factor EN 89; AltName: Full=bHLH transcription factor bHLH137)
Phn-m0139-3p	TRINITY_DN85693_c0_g1	0.8	1	24	219	242	ATGTGAGTGGGTGTCGCCGAGACT	||||||||||||||||||||:|*|	TACACTCACCCACAGCGGCTTTAA					K18878	UPA20	map04626(Plant-pathogen interaction)			gi|731334657|ref|XP_010678331.1|( PREDICTED: transcription factor bHLH137 isoform X2 [Beta vulgaris subsp. vulgaris])	gi|75305763|sp|Q93W88.1|BH137_ARATH(RecName: Full=Transcription factor bHLH137; AltName: Full=Basic helix-loop-helix protein 137; Short=AtbHLH137; Short=bHLH 137; AltName: Full=Transcription factor EN 89; AltName: Full=bHLH transcription factor bHLH137)
Phn-m0154-3p	TRINITY_DN86386_c1_g1	0.8	1	24	1297	1320	AATTTCAGTCCAAAATAACAGGGC	|||||||||||||||:||||:|||	TTAAAGTCAGGTTTTGTTGTTCCG								PF01156.16(IU_nuc_hydro:Inosine-uridine preferring nucleoside hydrolase)		gi|731343911|ref|XP_010683131.1|( PREDICTED: probable uridine nucleosidase 2 [Beta vulgaris subsp. vulgaris])	gi|75154756|sp|Q8LAC4.1|URH2_ARATH(RecName: Full=Probable uridine nucleosidase 2; AltName: Full=Uridine ribohydrolase 2)
Phn-m0155-5p	TRINITY_DN86156_c4_g2	0.8	1	24	3325	3348	TTGGAAACAATCTCTTTGTGATAT	||||||||||:||||||||:||||	AACCTTTGTTGGAGAAACATTATA								PF13041.3(PPR_2:PPR repeat family); PF12854.4(PPR_1:PPR repeat); PF01535.17(PPR:PPR repeat); PF13812.3(PPR_3:Pentatricopeptide repeat domain); PF17177.1(PPR_long:Pentacotripeptide-repeat region of PROPR)		gi|902240870|gb|KNA26109.1|( hypothetical protein SOVF_000460 [Spinacia oleracea])	gi|122215314|sp|Q3ECH5.1|PP107_ARATH(RecName: Full=Pentatricopeptide repeat-containing protein At1g66345, mitochondrial; Flags: Precursor)
Phn-m0165-3p	TRINITY_DN90238_c2_g1	0.8	1	22	43	64	GGATACGCTTTTATGAGGAAAA	|||||||||||||||||:*|||	CCTATGCGAAAATACTCTCTTT					K20309	TRAPPC12		PF07719.14(TPR_2:Tetratricopeptide repeat); PF00515.25(TPR_1:Tetratricopeptide repeat); PF13431.3(TPR_17:Tetratricopeptide repeat); PF13424.3(TPR_12:Tetratricopeptide repeat)		gi|731338936|ref|XP_010680582.1|( PREDICTED: trafficking protein particle complex subunit 12 [Beta vulgaris subsp. vulgaris])	gi|342187087|sp|Q8K2L8.2|TPC12_MOUSE(RecName: Full=Trafficking protein particle complex subunit 12; AltName: Full=Tetratricopeptide repeat protein 15; Short=TPR repeat protein 15)
Phn-m0182-5p	TRINITY_DN88941_c7_g1	0.8	1	24	3139	3162	AGGTTATATAACGTTGATTGAGCC	||||||||||||||||||||*:||	TCCAATATATTGCAACTAACCTGG		NOG129202(T:Signal transduction mechanisms )		NOG129202(serine threonine-protein phosphatase)	K06269	PPP1C	map03015(mRNA surveillance pathway)	PF00149.25(Metallophos:Calcineurin-like phosphoesterase); PF16891.2(STPPase_N:Serine-threonine protein phosphatase N-terminal domain)	GO:0006470(biological_process:protein dephosphorylation); GO:0004721(molecular_function:phosphoprotein phosphatase activity); GO:0046872(molecular_function:metal ion binding)	gi|702240149|ref|XP_010044385.1|( PREDICTED: serine/threonine-protein phosphatase PP1-like [Eucalyptus grandis])	gi|1346754|sp|P48482.1|PP12_ARATH(RecName: Full=Serine/threonine-protein phosphatase PP1 isozyme 2)
Phn-m0198-3p	TRINITY_DN93205_c1_g1	0.8	1	23	557	579	CTAATTCTGAAAACCGCACCCGT	||||:|||||||||||||||||:	GATTGAGACTTTTGGCGTGGGCG					K20093	ERCC6L, PICH		PF00271.28(Helicase_C:Helicase conserved C-terminal domain); PF15328.3(GCOM2:Putative GRINL1B complex locus protein 2)	GO:0005524(molecular_function:ATP binding)	gi|731327255|ref|XP_010674428.1|( PREDICTED: protein CHROMATIN REMODELING 24 [Beta vulgaris subsp. vulgaris])	gi|75331245|sp|Q8W103.1|CHR24_ARATH(RecName: Full=Protein CHROMATIN REMODELING 24; Short=AtCHR24; AltName: Full=DNA excision repair protein CHR24)
Phn-m0256-5p	TRINITY_DN86743_c0_g2	0.8	1	23	2035	2057	GGATATCCAAAGTGTTTGAAACT	||||||||||||:|||||||||:	CCTATAGGTTTCGCAAACTTTGG								PF03567.11(Sulfotransfer_2:Sulfotransferase family); PF00685.24(Sulfotransfer_1:Sulfotransferase domain)	GO:0016740(molecular_function:transferase activity); GO:0016020(cellular_component:membrane)	gi|731356164|ref|XP_010689528.1|( PREDICTED: protein-tyrosine sulfotransferase isoform X1 [Beta vulgaris subsp. vulgaris])	gi|261277918|sp|Q3EDG5.3|TPST_ARATH(RecName: Full=Protein-tyrosine sulfotransferase; AltName: Full=Tyrosylprotein sulfotransferase; Flags: Precursor)
Phn-m0295-3p	TRINITY_DN92092_c2_g1	0.8	1	24	965	988	ATCGATGTGTCATAAGATATGAGA	||||||||||||:|||||||||:|	TAGCTACACAGTGTTCTATACTTT								PF00295.14(Glyco_hydro_28:Glycosyl hydrolases family 28); PF13229.3(Beta_helix:Right handed beta helix region)	GO:0005975(biological_process:carbohydrate metabolic process); GO:0005576(cellular_component:extracellular region); GO:0004650(molecular_function:polygalacturonase activity); GO:0071555(biological_process:cell wall organization)	gi|731321957|ref|XP_010671628.1|( PREDICTED: probable polygalacturonase [Beta vulgaris subsp. vulgaris])	gi|223635599|sp|A7PZL3.1|PGLR_VITVI(RecName: Full=Probable polygalacturonase; Short=PG; AltName: Full=Pectinase)
Phn-m0011-3p	TRINITY_DN87952_c0_g1	1	1	22	2776	2797	ACGTAAACAACATGATATATCG	|||||||||||*||||||||||	TGCATTTGTTGGACTATATAGC								PF00643.21(zf-B_box:B-box zinc finger)		gi|902193964|gb|KNA12426.1|( hypothetical protein SOVF_126070 [Spinacia oleracea])	gi|52788299|sp|Q9SYM2.2|BBX22_ARATH(RecName: Full=B-box zinc finger protein 22; AltName: Full=Protein DOUBLE B-BOX 3; AltName: Full=Protein LIGHT-REGULATED ZINC FINGER PROTEIN 1; AltName: Full=Protein SALT TOLERANCE HOMOLOG 3)
Phn-m0011-3p	TRINITY_DN90759_c4_g3	1	1	22	1042	1063	ACGTAAACAACATGATATATCG	||||||||||||||||*|||||	TGCATTTGTTGTACTACATAGC		NOG08754(S:Function unknown )		NOG08754(Family with sequence similarity 91, member A1)				PF14647.3(FAM91_N:FAM91 N-terminus); PF14648.3(FAM91_C:FAM91 C-terminus)		gi|731312672|ref|XP_010675835.1|( PREDICTED: protein FAM91A1 isoform X1 [Beta vulgaris subsp. vulgaris])	gi|123797490|sp|Q3UVG3.1|F91A1_MOUSE(RecName: Full=Protein FAM91A1)
Phn-m0013-3p	TRINITY_DN86809_c2_g2	1	1	22	1847	1868	ACGTAAACAAATGACTGGAACG	|||||||||||||||||:||*:	TGCATTTGTTTACTGACTTTAT								PF03372.20(Exo_endo_phos:Endonuclease/Exonuclease/phosphatase family)	GO:0046030(molecular_function:inositol trisphosphate phosphatase activity)	gi|731336125|ref|XP_010679089.1|( PREDICTED: type I inositol 1,4,5-trisphosphate 5-phosphatase CVP2 [Beta vulgaris subsp. vulgaris])	gi|75244218|sp|Q8GTS0.1|IP5P4_ARATH(RecName: Full=Type I inositol polyphosphate 5-phosphatase 4; Short=At5PTase4)
Phn-m0013-3p	TRINITY_DN87158_c0_g4	1	1	22	2340	2361	ACGTAAACAAATGACTGGAACG	||||||||||||:||:||||||	TGCATTTGTTTATTGGCCTTGC	COG0531(E:Amino acid transport and metabolism )		COG0531(amino acid)					PF13520.3(AA_permease_2:Amino acid permease); PF00324.18(AA_permease:Amino acid permease)	GO:0003333(biological_process:amino acid transmembrane transport); GO:0015171(molecular_function:amino acid transmembrane transporter activity); GO:0016021(cellular_component:integral component of membrane)	gi|902232557|gb|KNA22680.1|( hypothetical protein SOVF_031980 [Spinacia oleracea])	gi|75311177|sp|Q9LHN7.1|PHSC_ARATH(RecName: Full=Probable polyamine transporter At3g13620)
Phn-m0013-3p	TRINITY_DN91500_c1_g1	1	1	22	123	144	ACGTAAACAAATGACTGGAACG	|||||||||||||||*||||||	TGCATTTGTTTACTGCCCTTGC					K00789	metK	map00270(Cysteine and methionine metabolism)	PF00438.17(S-AdoMet_synt_N:S-adenosylmethionine synthetase, N-terminal domain); PF02772.13(S-AdoMet_synt_M:S-adenosylmethionine synthetase, central domain)	GO:0005737(cellular_component:cytoplasm); GO:0006556(biological_process:S-adenosylmethionine biosynthetic process); GO:0046872(molecular_function:metal ion binding); GO:0004478(molecular_function:methionine adenosyltransferase activity); GO:0006730(biological_process:one-carbon metabolic process); GO:0005524(molecular_function:ATP binding)	gi|122220256|sp|Q4H1G4.1|METK1_BETVU(METK1_BETVU RecName: Full=S-adenosylmethionine synthase 1; Short=AdoMet synthase 1; AltName: Full=Methionine adenosyltransferase 1; Short=MAT 1)	gi|122220256|sp|Q4H1G4.1|METK1_BETVU(RecName: Full=S-adenosylmethionine synthase 1; Short=AdoMet synthase 1; AltName: Full=Methionine adenosyltransferase 1; Short=MAT 1)
Phn-m0013-3p	TRINITY_DN91841_c1_g1	1	1	22	111	132	ACGTAAACAAATGACTGGAACG	|||||||||||||||*||||||	TGCATTTGTTTACTGTCCTTGC					K13126	PABPC	map03018(RNA degradation); map03013(RNA transport); map03015(mRNA surveillance pathway)			gi|1021023675|gb|KZM81463.1|( hypothetical protein DCAR_029076 [Daucus carota subsp. sativus])	gi|1171978|sp|P42731.1|PABP2_ARATH(RecName: Full=Polyadenylate-binding protein 2; Short=PABP-2; Short=Poly(A)-binding protein 2)
Phn-m0036-5p	TRINITY_DN88364_c1_g1	1	1	23	94	116	ATGGACTGGATCTGGATTGGATC	|||||||:||||||:||||||||	TACCTGATCTAGACTTAACCTAG									GO:0016491(molecular_function:oxidoreductase activity); GO:0055114(biological_process:oxidation-reduction process)	gi|225438615|ref|XP_002281012.1|( PREDICTED: NADPH-dependent 1-acyldihydroxyacetone phosphate reductase [Vitis vinifera])	gi|75311390|sp|Q9LN95.1|BH055_ARATH(RecName: Full=Transcription factor bHLH55; AltName: Full=Basic helix-loop-helix protein 55; Short=AtbHLH55; Short=bHLH 55; AltName: Full=Transcription factor EN 1; AltName: Full=bHLH transcription factor bHLH055)
Phn-m0049-5p	TRINITY_DN87996_c5_g3	1	1	24	1241	1264	ATCCGTTGGATATGGACTGGATCT	|||||||:|||||:||||||||||	TAGGCAATCTATATCTGACCTAGA	COG2118(R:General function prediction only )		COG2118(DNA-binding protein)		K06875	PDCD5, TFAR19		PF01984.17(dsDNA_bind:Double-stranded DNA-binding domain)	GO:0003677(molecular_function:DNA binding)	gi|902240258|gb|KNA25940.1|( hypothetical protein SOVF_001900 [Spinacia oleracea])	gi|6686019|sp|P56812.3|PDCD5_MOUSE(RecName: Full=Programmed cell death protein 5; AltName: Full=TF-1 cell apoptosis-related protein 19; Short=Protein TFAR19)
Phn-m0053-3p	TRINITY_DN90456_c0_g2	1	1	24	2061	2084	AATAATGTTATATTTACGATCAAC	||:|||||||||||||||||*|||	TTGTTACAATATAAATGCTATTTG								PF13041.3(PPR_2:PPR repeat family); PF01535.17(PPR:PPR repeat); PF12854.4(PPR_1:PPR repeat); PF13812.3(PPR_3:Pentatricopeptide repeat domain); PF17177.1(PPR_long:Pentacotripeptide-repeat region of PROPR)		gi|731355371|ref|XP_010689107.1|( PREDICTED: pentatricopeptide repeat-containing protein At2g28050 [Beta vulgaris subsp. vulgaris])	gi|75268044|sp|Q9ZUU7.1|PP174_ARATH(RecName: Full=Pentatricopeptide repeat-containing protein At2g28050)
Phn-m0065-3p	TRINITY_DN88920_c0_g3	1	1	24	187	210	ATAGTTTAGAGGGAGAGTGGCACG	||||:||||||||||||||:|||:	TATCGAATCTCCCTCTCACTGTGT					K02960	RP-S16e, RPS16	map03010(Ribosome)	PF00380.16(Ribosomal_S9:Ribosomal protein S9/S16)	GO:0003735(molecular_function:structural constituent of ribosome); GO:0022627(cellular_component:cytosolic small ribosomal subunit); GO:0006412(biological_process:translation); GO:0000462(biological_process:maturation of SSU-rRNA from tricistronic rRNA transcript (SSU-rRNA, 5.8S rRNA, LSU-rRNA))	gi|1026018066|ref|XP_016539496.1|( PREDICTED: 40S ribosomal protein S16-like [Capsicum annuum])	gi|1173209|sp|P46293.1|RS16_GOSHI(RecName: Full=40S ribosomal protein S16)
Phn-m0066-3p	TRINITY_DN88264_c1_g3	1	1	23	1362	1384	TAGAGATACTGGCACTGATAGCC	||||||||||:|||||:||||||	ATCTCTATGATCGTGATTATCGG	COG1131(V:Defense mechanisms )		COG1131((ABC) transporter)					PF01061.21(ABC2_membrane:ABC-2 type transporter); PF00005.24(ABC_tran:ABC transporter); PF13555.3(AAA_29:P-loop containing region of AAA domain); PF13191.3(AAA_16:AAA ATPase domain); PF13304.3(AAA_21:AAA domain, putative AbiEii toxin, Type IV TA system); PF03193.13(DUF258:Protein of unknown function, DUF258)	GO:0016021(cellular_component:integral component of membrane); GO:0016887(molecular_function:ATPase activity); GO:0005524(molecular_function:ATP binding)	gi|731318527|ref|XP_010669774.1|( PREDICTED: ABC transporter G family member 6-like [Beta vulgaris subsp. vulgaris])	gi|259016169|sp|Q9M2V7.2|AB16G_ARATH(RecName: Full=ABC transporter G family member 16; Short=ABC transporter ABCG.16; Short=AtABCG16; AltName: Full=Probable white-brown complex homolog protein 16; Short=AtWBC16)
Phn-m0069-3p	TRINITY_DN87952_c0_g1	1	1	23	2771	2793	AAACAACCTGATGTATCGGAGGG	||||||||||||:||||||||*|	TTTGTTGGACTATATAGCCTCAC								PF00643.21(zf-B_box:B-box zinc finger)		gi|902193964|gb|KNA12426.1|( hypothetical protein SOVF_126070 [Spinacia oleracea])	gi|52788299|sp|Q9SYM2.2|BBX22_ARATH(RecName: Full=B-box zinc finger protein 22; AltName: Full=Protein DOUBLE B-BOX 3; AltName: Full=Protein LIGHT-REGULATED ZINC FINGER PROTEIN 1; AltName: Full=Protein SALT TOLERANCE HOMOLOG 3)
Phn-m0069-3p	TRINITY_DN88126_c1_g5	1	1	23	23	45	AAACAACCTGATGTATCGGAGGG	|||||||||:||:||||||||||	TTTGTTGGATTATATAGCCTCCC					K09287	RAV				gi|902222130|gb|KNA19098.1|( hypothetical protein SOVF_064760 [Spinacia oleracea])	gi|75268209|sp|Q9C6P5.1|RAVL2_ARATH(RecName: Full=AP2/ERF and B3 domain-containing transcription factor At1g50680; AltName: Full=RAV1-like ethylene-responsive transcription factor At1g50680)
Phn-m0069-3p	TRINITY_DN89588_c5_g2	1	1	23	3593	3615	AAACAACCTGATGTATCGGAGGG	||||||||||||||||||||*|*	TTTGTTGGACTACATAGCCTACA		NOG104786(A:RNA processing and modification )		NOG104786(Small nuclear ribonucleoprotein 27kDa (U4 U6.U5))	K12846	SNRNP27	map03040(Spliceosome)	PF08648.9(DUF1777:Protein of unknown function (DUF1777))	GO:0071011(cellular_component:precatalytic spliceosome)	gi|567922682|ref|XP_006453347.1|( hypothetical protein CICLE_v10009582mg [Citrus clementina])	gi|74760570|sp|Q8WVK2.1|SNR27_HUMAN(RecName: Full=U4/U6.U5 small nuclear ribonucleoprotein 27 kDa protein; Short=U4/U6.U5 snRNP 27 kDa protein; Short=U4/U6.U5-27K; AltName: Full=Nucleic acid-binding protein RY-1; AltName: Full=U4/U6.U5 tri-snRNP-associated 27 kDa protein; Short=27K; AltName: Full=U4/U6.U5 tri-snRNP-associated protein 3)
Phn-m0069-3p	TRINITY_DN89846_c0_g1	1	1	23	5223	5245	AAACAACCTGATGTATCGGAGGG	||||*||||||||||||||||||	TTTGCTGGACTACATAGCCTCCC								PF05911.8(FPP:Filament-like plant protein, long coiled-coil); PF00036.29(EF-hand_1:EF hand); PF13833.3(EF-hand_8:EF-hand domain pair); PF13499.3(EF-hand_7:EF-hand domain pair); PF13405.3(EF-hand_6:EF-hand domain); PF13202.3(EF-hand_5:EF hand); PF14658.3(EF-hand_9:EF-hand domain); PF12763.4(EF-hand_4:Cytoskeletal-regulatory complex EF hand); PF10591.6(SPARC_Ca_bdg:Secreted protein acidic and rich …		gi|731327147|ref|XP_010674375.1|( PREDICTED: filament-like plant protein 3 isoform X1 [Beta vulgaris subsp. vulgaris])	gi|205716708|sp|Q9MA92.2|FPP3_ARATH(RecName: Full=Filament-like plant protein 3; Short=AtFPP3)
Phn-m0069-3p	TRINITY_DN92548_c7_g1	1	1	23	5536	5558	AAACAACCTGATGTATCGGAGGG	|||||||*|||||||||||||||	TTTGTTGAACTACATAGCCTCCC								PF00394.19(Cu-oxidase:Multicopper oxidase); PF07731.11(Cu-oxidase_2:Multicopper oxidase); PF00036.29(EF-hand_1:EF hand); PF13202.3(EF-hand_5:EF hand); PF13405.3(EF-hand_6:EF-hand domain); PF13499.3(EF-hand_7:EF-hand domain pair); PF13833.3(EF-hand_8:EF-hand domain pair); PF12763.4(EF-hand_4:Cytoskeletal-regulatory complex EF hand); PF10591.6(SPARC_Ca_bdg:Secreted protein acidic and rich in cystei…	GO:0016491(molecular_function:oxidoreductase activity); GO:0055114(biological_process:oxidation-reduction process); GO:0005507(molecular_function:copper ion binding)	gi|902173126|gb|KNA08226.1|( hypothetical protein SOVF_164390 [Spinacia oleracea])	gi|114268|sp|Q00624.1|ASOL_BRANA(RecName: Full=L-ascorbate oxidase homolog; Flags: Precursor)
Phn-m0069-3p	TRINITY_DN92815_c0_g2	1	1	23	2740	2762	AAACAACCTGATGTATCGGAGGG	||||||||:|||||||||||||*	TTTGTTGGGCTACATAGCCTCCA					K05917	CYP51	map00100(Steroid biosynthesis)	PF00067.19(p450:Cytochrome P450)	GO:0008398(molecular_function:sterol 14-demethylase activity); GO:0070988(biological_process:demethylation); GO:0005886(cellular_component:plasma membrane); GO:0005506(molecular_function:iron ion binding); GO:0020037(molecular_function:heme binding); GO:0032259(biological_process:methylation); GO:0016021(cellular_component:integral component of membrane); GO:0008168(molecular_function:methyltrans…	gi|731360761|ref|XP_010691994.1|( PREDICTED: obtusifoliol 14-alpha demethylase-like [Beta vulgaris subsp. vulgaris])	gi|75313134|sp|Q9SAA9.1|CP511_ARATH(RecName: Full=Sterol 14-demethylase; AltName: Full=Cytochrome P450 51A2; AltName: Full=Cytochrome P450 51G1; Short=AtCYP51; AltName: Full=Obtusifoliol 14-demethylase; AltName: Full=Protein EMBRYO DEFECTIVE 1738)
Phn-m0078-5p	TRINITY_DN90282_c5_g2	1	1	24	1227	1250	ATTTCCGGTCAAAGTTTTTCAACT	|||||||||*||||||||||||||	TAAAGGCCAATTTCAAAAAGTTGA										gi|1021038203|gb|KZM95986.1|( hypothetical protein DCAR_019228 [Daucus carota subsp. sativus])	gi|75273961|sp|Q9LSE7.1|B561C_ARATH(RecName: Full=Cytochrome b561 and DOMON domain-containing protein At3g25290; AltName: Full=Protein b561A.tha3; Flags: Precursor)
Phn-m0082-3p	TRINITY_DN86382_c0_g1	1	1	22	143	164	AACGTGAACAATCTGATGTATC	|||||:||||||||:|||||||	TTGCATTTGTTAGATTACATAG								PF05705.11(DUF829:Eukaryotic protein of unknown function (DUF829))		gi|902203607|gb|KNA14614.1|( hypothetical protein SOVF_105800 [Spinacia oleracea])	gi|74758243|sp|Q6P2H8.1|TMM53_HUMAN(RecName: Full=Transmembrane protein 53)
Phn-m0082-3p	TRINITY_DN90101_c3_g6	1	1	22	906	927	AACGTGAACAATCTGATGTATC	|||||:|||||:||||||||||	TTGCATTTGTTGGACTACATAG										gi|1023976459|gb|KZV19530.1|( hypothetical protein F511_06392 [Dorcoceras hygrometricum])	gi|75164879|sp|Q949X9.1|LPR2_ARATH(RecName: Full=Multicopper oxidase LPR2; AltName: Full=Protein LOW PHOSPHATE ROOT 2; Flags: Precursor)
Phn-m0082-3p	TRINITY_DN92111_c0_g2	1	1	22	4078	4099	AACGTGAACAATCTGATGTATC	|||||:|||||||:||||||||	TTGCATTTGTTAGGCTACATAG					K05747	WAS	map04144(Endocytosis)			gi|731350576|ref|XP_010686573.1|( PREDICTED: uncharacterized protein At4g04980-like isoform X1 [Beta vulgaris subsp. vulgaris])	gi|122180140|sp|Q1PEB4.1|Y4498_ARATH(RecName: Full=Uncharacterized protein At4g04980)
Phn-m0087-5p	TRINITY_DN86042_c1_g2	1	1	22	107	128	TAAGGCCATGTTCTTTTGGACT	||||||*|||||||||||||||	ATTCCGATACAAGAAAACCTGA					K15711	SMARCA3, HLTF		PF00176.20(SNF2_N:SNF2 family N-terminal domain); PF00271.28(Helicase_C:Helicase conserved C-terminal domain); PF13920.3(zf-C3HC4_3:Zinc finger, C3HC4 type (RING finger)); PF14634.3(zf-RING_5:zinc-RING finger domain); PF00097.22(zf-C3HC4:Zinc finger, C3HC4 type (RING finger)); PF13923.3(zf-C3HC4_2:Zinc finger, C3HC4 type (RING finger)); PF13639.3(zf-RING_2:Ring finger domain); PF08797.8(HIRAN:HIR…	GO:0046872(molecular_function:metal ion binding); GO:0097159(molecular_function:organic cyclic compound binding); GO:1901363(molecular_function:heterocyclic compound binding)	gi|731324602|ref|XP_010673058.1|( PREDICTED: putative SWI/SNF-related matrix-associated actin-dependent regulator of chromatin subfamily A member 3-like 1 [Beta vulgaris subsp. vulgaris])	gi|60390959|sp|Q9FF61.1|SM3L1_ARATH(RecName: Full=Putative SWI/SNF-related matrix-associated actin-dependent regulator of chromatin subfamily A member 3-like 1; Short=SMARCA3-like protein 1)
Phn-m0087-5p	TRINITY_DN86557_c2_g1	1	1	22	158	179	TAAGGCCATGTTCTTTTGGACT	|*||||||||||||||||||||	AATCCGGTACAAGAAAACCTGA										gi|1012342160|gb|KYP53356.1|( Retrovirus-related Pol polyprotein from transposon TNT 1-94 [Cajanus cajan])	gi|130582|sp|P10978.1|POLX_TOBAC(RecName: Full=Retrovirus-related Pol polyprotein from transposon TNT 1-94; Includes: RecName: Full=Protease; Includes: RecName: Full=Reverse transcriptase; Includes: RecName: Full=Endonuclease)
Phn-m0087-5p	TRINITY_DN88402_c0_g3	1	1	22	57	78	TAAGGCCATGTTCTTTTGGACT	|||||||*||||||||||||||	ATTCCGGAACAAGAAAACCTGA	COG0362(G:Carbohydrate transport and metabolism )		COG0362(Catalyzes the oxidative decarboxylation of 6- phosphogluconate to ribulose 5-phosphate and CO(2), with concomitant reduction of NADP to NADPH (By similarity))		K00033	PGD, gnd, gntZ	map00480(Glutathione metabolism); map00030(Pentose phosphate pathway)	PF00393.16(6PGD:6-phosphogluconate dehydrogenase, C-terminal domain); PF03446.12(NAD_binding_2:NAD binding domain of 6-phosphogluconate dehydrogenase)	GO:0005737(cellular_component:cytoplasm); GO:0019521(biological_process:D-gluconate metabolic process); GO:0006098(biological_process:pentose-phosphate shunt); GO:0004616(molecular_function:phosphogluconate dehydrogenase (decarboxylating) activity); GO:0055114(biological_process:oxidation-reduction process)	gi|731340274|ref|XP_010681308.1|( PREDICTED: 6-phosphogluconate dehydrogenase, decarboxylating 1 [Beta vulgaris subsp. vulgaris])	gi|75306665|sp|Q94KU1.1|6PGD1_SPIOL(RecName: Full=6-phosphogluconate dehydrogenase, decarboxylating 1)
Phn-m0087-5p	TRINITY_DN88477_c7_g1	1	1	22	546	567	TAAGGCCATGTTCTTTTGGACT	|||||||*||||||||||||||	ATTCCGGAACAAGAAAACCTGA	COG3332(S:Function unknown )		COG3332(ser Thr-rich protein T10 in DGCR)					PF05742.9(TANGO2:Transport and Golgi organisation 2)		gi|731358077|ref|XP_010690540.1|( PREDICTED: transport and Golgi organization protein 2 homolog [Beta vulgaris subsp. vulgaris])	gi|1711658|sp|P54797.1|TNG2_MOUSE(RecName: Full=Transport and Golgi organization 2 homolog; AltName: Full=Ser/Thr-rich protein T10 in DGCR region)
Phn-m0087-5p	TRINITY_DN89019_c1_g1	1	1	22	1828	1849	TAAGGCCATGTTCTTTTGGACT	||||:||||:||||||||||||	ATTCTGGTATAAGAAAACCTGA					K07297	ADIPOR		PF03006.17(HlyIII:Haemolysin-III related)	GO:0016021(cellular_component:integral component of membrane)	gi|902227736|gb|KNA20819.1|( hypothetical protein SOVF_049150 [Spinacia oleracea])	gi|75147306|sp|Q84N34.1|HHP2_ARATH(RecName: Full=Heptahelical transmembrane protein 2; AltName: Full=PAQR family protein HHP2)
Phn-m0087-5p	TRINITY_DN89251_c0_g1	1	1	22	1831	1852	TAAGGCCATGTTCTTTTGGACT	|||||||||:|||||||::|||	ATTCCGGTATAAGAAAATTTGA									GO:0016788(molecular_function:hydrolase activity, acting on ester bonds)	gi|702448715|ref|XP_010025155.1|( PREDICTED: GDSL esterase/lipase At1g54790 isoform X1 [Eucalyptus grandis])	gi|122215379|sp|Q3ECP6.1|GDL22_ARATH(RecName: Full=GDSL esterase/lipase At1g54790; AltName: Full=Extracellular lipase At1g54790; Flags: Precursor)
Phn-m0087-5p	TRINITY_DN89262_c4_g1	1	1	22	1706	1727	TAAGGCCATGTTCTTTTGGACT	|*||||||||||||||||||||	AGTCCGGTACAAGAAAACCTGA					K04713	SUR2	map00600(Sphingolipid metabolism)		GO:0006633(biological_process:fatty acid biosynthetic process); GO:0005506(molecular_function:iron ion binding); GO:0016021(cellular_component:integral component of membrane); GO:0000254(molecular_function:C-4 methylsterol oxidase activity); GO:0055114(biological_process:oxidation-reduction process)	gi|1000958517|ref|XP_015576859.1|( PREDICTED: sphinganine C4-monooxygenase 1 isoform X2 [Ricinus communis])	gi|75248486|sp|Q8VYI1.1|SBH1_ARATH(RecName: Full=Sphinganine C4-monooxygenase 1; AltName: Full=Sphingoid C4-hydroxylase 1; AltName: Full=Sphingoid base hydroxylase 1)
Phn-m0087-5p	TRINITY_DN89392_c3_g3	1	1	22	165	186	TAAGGCCATGTTCTTTTGGACT	|||||*||||||||||||||||	ATTCCAGTACAAGAAAACCTGA					K20884	FHY	map00740(Riboflavin metabolism)		GO:0008531(molecular_function:riboflavin kinase activity); GO:0009231(biological_process:riboflavin biosynthetic process); GO:0016310(biological_process:phosphorylation); GO:0016787(molecular_function:hydrolase activity)	gi|870852583|gb|KMT04498.1|( hypothetical protein BVRB_8g181640 [Beta vulgaris subsp. vulgaris])	gi|75147182|sp|Q84MD8.1|FHYRK_ARATH(RecName: Full=Bifunctional riboflavin kinase/FMN phosphatase; Includes: RecName: Full=FMN phosphatase; AltName: Full=FMN phosphohydrolase; Includes: RecName: Full=Riboflavin kinase; AltName: Full=Flavokinase)
Phn-m0087-5p	TRINITY_DN89745_c4_g2	1	1	22	25	46	TAAGGCCATGTTCTTTTGGACT	|||||||*||||||||||||||	ATTCCGGGACAAGAAAACCTGA								PF00076.19(RRM_1:RNA recognition motif. (a.k.a. RRM, RBD, or RNP domain)); PF13893.3(RRM_5:RNA recognition motif. (a.k.a. RRM, RBD, or RNP domain))	GO:0003676(molecular_function:nucleic acid binding); GO:0000166(molecular_function:nucleotide binding)	gi|731325654|ref|XP_010673626.1|( PREDICTED: polyadenylate-binding protein RBP47B' [Beta vulgaris subsp. vulgaris])	gi|75331115|sp|Q8VXZ9.1|R47BP_ARATH(RecName: Full=Polyadenylate-binding protein RBP47B'; Short=Poly(A)-binding protein RBP47B'; AltName: Full=RNA-binding protein 47B'; Short=AtRBP47B prime; Short=AtRBP47B')
Phn-m0087-5p	TRINITY_DN90882_c3_g2	1	1	22	684	705	TAAGGCCATGTTCTTTTGGACT	|||||||*||||||||||||||	ATTCCGGAACAAGAAAACCTGA	COG1503(J:Translation, ribosomal structure and biogenesis )		COG1503(Peptide Chain Release Factor)		K03265	ETF1, ERF1	map03015(mRNA surveillance pathway)	PF03465.12(eRF1_3:eRF1 domain 3)	GO:0005737(cellular_component:cytoplasm); GO:0006415(biological_process:translational termination); GO:0016149(molecular_function:translation release factor activity, codon specific)	gi|242050730|ref|XP_002463109.1|( hypothetical protein SORBIDRAFT_02g037930 [Sorghum bicolor])	gi|18206253|sp|Q9LPV8.1|ERF1Y_ARATH(RecName: Full=Eukaryotic peptide chain release factor subunit 1-2; Short=Eukaryotic release factor 1-2; Short=eRF1-2; AltName: Full=Omnipotent suppressor protein 1 homolog 2; Short=SUP1 homolog 2)
Phn-m0087-5p	TRINITY_DN91911_c3_g3	1	1	22	1436	1457	TAAGGCCATGTTCTTTTGGACT	|||||*||||||||||||||||	ATTCCAGTACAAGAAAACCTGA					K09510	DNAJB4		PF01556.15(DnaJ_C:DnaJ C terminal domain); PF00226.28(DnaJ:DnaJ domain)		gi|590693650|ref|XP_007044393.1|( DNAJ heat shock family protein [Theobroma cacao])	gi|41704179|sp|P59910.1|DJB13_HUMAN(RecName: Full=DnaJ homolog subfamily B member 13; AltName: Full=Testis and spermatogenesis cell-related protein 6; AltName: Full=Testis spermatocyte apoptosis-related gene 6 protein; AltName: Full=Testis spermatogenesis apoptosis-related gene 3 protein; AltName: Full=Testis spermatogenesis apoptosis-related gene 6 protein)
Phn-m0087-5p	TRINITY_DN92271_c3_g2	1	1	22	3390	3411	TAAGGCCATGTTCTTTTGGACT	|||||*||||||||||||||||	ATTCCAGTACAAGAAAACCTGA					K06269	PPP1C	map03015(mRNA surveillance pathway)	PF00149.25(Metallophos:Calcineurin-like phosphoesterase); PF16891.2(STPPase_N:Serine-threonine protein phosphatase N-terminal domain)	GO:0006470(biological_process:protein dephosphorylation); GO:0004721(molecular_function:phosphoprotein phosphatase activity); GO:0046872(molecular_function:metal ion binding)	gi|731320877|ref|XP_010671047.1|( PREDICTED: serine/threonine-protein phosphatase PP1 isozyme 2-like [Beta vulgaris subsp. vulgaris])	gi|108935873|sp|P48489.2|PP1_ORYSJ(RecName: Full=Serine/threonine-protein phosphatase PP1)
Phn-m0087-5p	TRINITY_DN92552_c5_g1	1	1	22	2575	2596	TAAGGCCATGTTCTTTTGGACT	|||||||*||||||||||||||	ATTCCGGGACAAGAAAACCTGA	COG5347(U:Intracellular trafficking, secretion, and vesicular transport )		COG5347(ankyrin repeat and PH)		K12486	SMAP	map04144(Endocytosis)	PF01412.15(ArfGap:Putative GTPase activating protein for Arf); PF00168.27(C2:C2 domain)	GO:0005096(molecular_function:GTPase activator activity); GO:0043547(biological_process:positive regulation of GTPase activity)	gi|731351518|ref|XP_010687080.1|( PREDICTED: ADP-ribosylation factor GTPase-activating protein AGD12-like [Beta vulgaris subsp. vulgaris])	gi|75172634|sp|Q9FVJ3.1|AGD12_ARATH(RecName: Full=ADP-ribosylation factor GTPase-activating protein AGD12; Short=ARF GAP AGD12; AltName: Full=Protein ARF-GAP DOMAIN 12; Short=AtAGD12; AltName: Full=Zinc- and calcium-binding protein; Short=AtZAC)
Phn-m0097-3p	TRINITY_DN91475_c0_g1	1	1	22	907	929	TGAGACAAAAACGATAAACT-GA	||||||||||||||||||*|*||	ACTCTGTTTTTGCTATTTTACCT								PF07859.10(Abhydrolase_3:alpha/beta hydrolase fold); PF00135.25(COesterase:Carboxylesterase family)		gi|902186619|gb|KNA10739.1|( hypothetical protein SOVF_141720 [Spinacia oleracea])	gi|75321270|sp|Q5NUF4.1|HIDM_GLYEC(RecName: Full=2-hydroxyisoflavanone dehydratase; AltName: Full=Carboxylesterase HIDM)
Phn-m0097-3p	TRINITY_DN91631_c1_g4	1	1	22	4240	4261	TGAGACAAAAACGATAAACTGA	|||||*||||||||||||||||	ACTCTATTTTTGCTATTTGACT	COG5069(Z:Cytoskeleton )		COG5069(Microtubule associated monoxygenase, calponin and LIM domain containing)		K17275	PLS1		PF00307.28(CH:Calponin homology (CH) domain); PF11971.5(CAMSAP_CH:CAMSAP CH domain); PF06294.8(CH_2:CH-like domain in sperm protein)	GO:0003779(molecular_function:actin binding)	gi|902236800|gb|KNA24546.1|( hypothetical protein SOVF_014730 [Spinacia oleracea])	gi|59797968|sp|Q9FKI0.1|FIMB5_ARATH(RecName: Full=Fimbrin-5; Short=AtFIM5; AltName: Full=Fimbrin-like protein 2; AltName: Full=Fimbrin5)
Phn-m0101-5p	TRINITY_DN84183_c0_g2	1	1	23	31	53	TGAAACCGTTGTATGCATACAAG	|:||||||||||||||||||||*	ATTTTGGCAACATACGTATGTTG								PF01612.17(DNA_pol_A_exo1:3'-5' exonuclease)	GO:0005737(cellular_component:cytoplasm); GO:0006139(biological_process:nucleobase-containing compound metabolic process); GO:0008408(molecular_function:3'-5' exonuclease activity); GO:0005634(cellular_component:nucleus)	gi|225450557|ref|XP_002277523.1|( PREDICTED: Werner Syndrome-like exonuclease [Vitis vinifera])	gi|75327902|sp|Q84LH3.1|WEX_ARATH(RecName: Full=Werner Syndrome-like exonuclease)
Phn-m0101-5p	TRINITY_DN89019_c4_g9	1	1	23	1661	1683	TGAAACCGTTGTATGCATACAAG	||||*||||||||||||||||||	ACTTCGGCAACATACGTATGTTC		NOG179271(S:Function unknown )		NOG179271()	K18635	SPR1				gi|1035926870|gb|OAY56457.1|( hypothetical protein MANES_02G018200 [Manihot esculenta])	gi|75156042|sp|Q8LGD1.1|SP1L5_ARATH(RecName: Full=Protein SPIRAL1-like 5)
Phn-m0101-5p	TRINITY_DN92688_c3_g1	1	1	23	272	294	TGAAACCGTTGTATGCATACAAG	||||||||*||||||||||||||	ACTTTGGCCACATACGTATGTTC					K03110	ftsY	map03060(Protein export)		GO:0005525(molecular_function:GTP binding); GO:0005622(cellular_component:intracellular); GO:0006614(biological_process:SRP-dependent cotranslational protein targeting to membrane)	gi|590722471|ref|XP_007051903.1|( Signal recognition particle receptor protein isoform 1 [Theobroma cacao])	gi|75099948|sp|O80842.2|CFTSY_ARATH(RecName: Full=Cell division protein FtsY homolog, chloroplastic; AltName: Full=Chloroplast SRP receptor homolog, alpha subunit CpFtsY; AltName: Full=Fused signal recognition particle receptor; Flags: Precursor)
Phn-m0107-3p	TRINITY_DN84450_c0_g1	1	1	24	1619	1642	AATTAAACGTAAACAATCTGATGT	||||||||||||||||:||:||:|	TTAATTTGCATTTGTTGGATTATA								PF13431.3(TPR_17:Tetratricopeptide repeat); PF13181.3(TPR_8:Tetratricopeptide repeat)		gi|731348638|ref|XP_010685590.1|( PREDICTED: uncharacterized protein LOC104899983 [Beta vulgaris subsp. vulgaris])	gi|110816488|sp|Q3BAI2.1|YCX91_PHAAO(RecName: Full=Uncharacterized protein ORF91 (chloroplast) [Phalaenopsis aphrodite subsp. formosana])
Phn-m0107-3p	TRINITY_DN90101_c3_g6	1	1	24	909	932	AATTAAACGTAAACAATCTGATGT	|||:||||||||||||:|||||||	TTAGTTTGCATTTGTTGGACTACA										gi|1023976459|gb|KZV19530.1|( hypothetical protein F511_06392 [Dorcoceras hygrometricum])	gi|75164879|sp|Q949X9.1|LPR2_ARATH(RecName: Full=Multicopper oxidase LPR2; AltName: Full=Protein LOW PHOSPHATE ROOT 2; Flags: Precursor)
Phn-m0108-3p	TRINITY_DN84450_c0_g1	1	1	24	1619	1642	AATTAAACGTAAACAATCTGATGT	||||||||||||||||:||:||:|	TTAATTTGCATTTGTTGGATTATA								PF13431.3(TPR_17:Tetratricopeptide repeat); PF13181.3(TPR_8:Tetratricopeptide repeat)		gi|731348638|ref|XP_010685590.1|( PREDICTED: uncharacterized protein LOC104899983 [Beta vulgaris subsp. vulgaris])	gi|110816488|sp|Q3BAI2.1|YCX91_PHAAO(RecName: Full=Uncharacterized protein ORF91 (chloroplast) [Phalaenopsis aphrodite subsp. formosana])
Phn-m0108-3p	TRINITY_DN90101_c3_g6	1	1	24	909	932	AATTAAACGTAAACAATCTGATGT	|||:||||||||||||:|||||||	TTAGTTTGCATTTGTTGGACTACA										gi|1023976459|gb|KZV19530.1|( hypothetical protein F511_06392 [Dorcoceras hygrometricum])	gi|75164879|sp|Q949X9.1|LPR2_ARATH(RecName: Full=Multicopper oxidase LPR2; AltName: Full=Protein LOW PHOSPHATE ROOT 2; Flags: Precursor)
Phn-m0113-3p	TRINITY_DN88341_c4_g1	1	1	24	2001	2024	AATATGTAACCCGCGGGTCCAACC	|*||||||||||||||||||||||	TAATACATTGGGCGCCCAGGTTGG		NOG83336(S:Function unknown )		NOG83336(Mitochondrial ribosomal protein L54)	K17435	MRPL54		PF08561.7(Ribosomal_L37:Mitochondrial ribosomal protein L37)		gi|902056906|gb|KNA02877.1|( hypothetical protein SOVF_214480, partial [Spinacia oleracea])	gi|585899|sp|P36532.2|RM37_YEAST(RecName: Full=54S ribosomal protein L37, mitochondrial; AltName: Full=YmL37; Flags: Precursor)
Phn-m0115-5p	TRINITY_DN88253_c0_g1	1	1	24	2800	2823	ATATACCGTAGATAACATTTTCGA	||||||*|||||||||||||||||	TATATGTCATCTATTGTAAAAGCT					K00873	PK, pyk	map00010(Glycolysis / Gluconeogenesis); map00230(Purine metabolism); map00620(Pyruvate metabolism)	PF00224.18(PK:Pyruvate kinase, barrel domain)		gi|225462751|ref|XP_002270689.1|( PREDICTED: plastidial pyruvate kinase 4, chloroplastic [Vitis vinifera])	gi|75183756|sp|Q9M3B6.1|PKP4_ARATH(RecName: Full=Plastidial pyruvate kinase 4, chloroplastic; Short=PKp4; Flags: Precursor)
Phn-m0129-5p	TRINITY_DN89287_c4_g1	1	1	23	3956	3978	AGCTTTCATGTAATGTTTCTGAG	|||||||||||*|||||||||||	TCGAAAGTACACTACAAAGACTC								PF12799.4(LRR_4:Leucine Rich repeats (2 copies)); PF13855.3(LRR_8:Leucine rich repeat); PF14580.3(LRR_9:Leucine-rich repeat); PF12937.4(F-box-like:F-box-like)		gi|731348680|ref|XP_010685611.1|( PREDICTED: leucine-rich repeat-containing protein 49 isoform X1 [Beta vulgaris subsp. vulgaris])	gi|122209417|sp|Q2V3R1.1|FB346_ARATH(RecName: Full=F-box protein At3g44326)
Phn-m0132-3p	TRINITY_DN86907_c2_g2	1	1	22	125	146	AAACGTAAACAACATGATGTAT	|||||||||||*||||||||||	TTTGCATTTGTAGTACTACATA		NOG10123(K:Transcription )		NOG10123(DNA binding protein GT-1)					GO:0006355(biological_process:regulation of transcription, DNA-templated); GO:0003700(molecular_function:transcription factor activity, sequence-specific DNA binding); GO:0003677(molecular_function:DNA binding); GO:0005634(cellular_component:nucleus)	gi|731343405|ref|XP_010682875.1|( PREDICTED: trihelix transcription factor GT-1 isoform X1 [Beta vulgaris subsp. vulgaris])	gi|75334447|sp|Q9FX53.1|TGT1_ARATH(RecName: Full=Trihelix transcription factor GT-1; AltName: Full=Trihelix DNA-binding protein GT-1)
Phn-m0132-3p	TRINITY_DN88713_c2_g4	1	1	22	511	532	AAACGTAAACAACATGATGTAT	|||||||||||||*||||||||	TTTGCATTTGTTGGACTACATA					K17913	CCD8	map00906(Carotenoid biosynthesis)			gi|731317284|ref|XP_010668385.1|( PREDICTED: carotenoid cleavage dioxygenase 8 homolog B, chloroplastic [Beta vulgaris subsp. vulgaris])	gi|75156392|sp|Q8LIY8.1|CCD8B_ORYSJ(RecName: Full=Carotenoid cleavage dioxygenase 8 homolog B, chloroplastic; Short=OsCCD8b; AltName: Full=Protein DWARF-10; AltName: Full=Protein MAX4 homolog; Flags: Precursor)
Phn-m0132-3p	TRINITY_DN89442_c1_g1	1	1	22	1930	1951	AAACGTAAACAACATGATGTAT	||||||||||||||||*|||||	TTTGCATTTGTTGTACAACATA								PF14379.3(Myb_CC_LHEQLE:MYB-CC type transfactor, LHEQLE motif); PF00249.28(Myb_DNA-binding:Myb-like DNA-binding domain)		gi|1009182428|ref|XP_015872708.1|( PREDICTED: myb family transcription factor APL-like isoform X2 [Ziziphus jujuba])	gi|75329886|sp|Q8LAJ7.1|PHL3_ARATH(RecName: Full=Protein PHR1-LIKE 3; AltName: Full=Myb family transcription factor PHL3; AltName: Full=Protein UNFERTILIZED EMBRYO SAC 16)
Phn-m0132-3p	TRINITY_DN90101_c3_g6	1	1	22	907	928	AAACGTAAACAACATGATGTAT	|||||||||||||*||||||||	TTTGCATTTGTTGGACTACATA										gi|1023976459|gb|KZV19530.1|( hypothetical protein F511_06392 [Dorcoceras hygrometricum])	gi|75164879|sp|Q949X9.1|LPR2_ARATH(RecName: Full=Multicopper oxidase LPR2; AltName: Full=Protein LOW PHOSPHATE ROOT 2; Flags: Precursor)
Phn-m0132-3p	TRINITY_DN90590_c0_g1	1	1	22	20	41	AAACGTAAACAACATGATGTAT	|||||||||||||*||||||||	TTTGCATTTGTTGAACTACATA										gi|657954824|ref|XP_008368863.1|( PREDICTED: protein PALE CRESS, chloroplastic-like [Malus domestica])	gi|75101925|sp|Q39089.1|PAC_ARATH(RecName: Full=Protein PALE CRESS, chloroplastic; Flags: Precursor)
Phn-m0132-3p	TRINITY_DN90880_c0_g3	1	1	22	729	750	AAACGTAAACAACATGATGTAT	|||||||||||||*||||||||	TTTGCATTTGTTGGACTACATA					K10579	UBE2M, UBC12	map04120(Ubiquitin mediated proteolysis)		GO:0016021(cellular_component:integral component of membrane); GO:0005524(molecular_function:ATP binding)	gi|902229708|gb|KNA21581.1|( hypothetical protein SOVF_041850 [Spinacia oleracea])	gi|75313330|sp|Q9SDY5.1|RCE1_ARATH(RecName: Full=NEDD8-conjugating enzyme Ubc12; AltName: Full=RUB1 carrier protein 1; AltName: Full=RUB1-conjugating enzyme 1; AltName: Full=RUB1-protein ligase 1)
Phn-m0132-3p	TRINITY_DN92252_c2_g1	1	1	22	3615	3636	AAACGTAAACAACATGATGTAT	|||*||||||||||||||||||	TTTTCATTTGTTGTACTACATA		NOG17832(S:Function unknown )		NOG17832(GDP-fucose protein O-fucosyltransferase)				PF10250.6(O-FucT:GDP-fucose protein O-fucosyltransferase)	GO:0016021(cellular_component:integral component of membrane)	gi|731362299|ref|XP_010692819.1|( PREDICTED: uncharacterized protein At1g04910 [Beta vulgaris subsp. vulgaris])	gi|75162430|sp|Q8W486.1|Y1491_ARATH(RecName: Full=Uncharacterized protein At1g04910)
Phn-m0132-3p	TRINITY_DN92548_c7_g1	1	1	22	5543	5564	AAACGTAAACAACATGATGTAT	|||||||||||||*||||||||	TTTGCATTTGTTGAACTACATA								PF00394.19(Cu-oxidase:Multicopper oxidase); PF07731.11(Cu-oxidase_2:Multicopper oxidase); PF00036.29(EF-hand_1:EF hand); PF13202.3(EF-hand_5:EF hand); PF13405.3(EF-hand_6:EF-hand domain); PF13499.3(EF-hand_7:EF-hand domain pair); PF13833.3(EF-hand_8:EF-hand domain pair); PF12763.4(EF-hand_4:Cytoskeletal-regulatory complex EF hand); PF10591.6(SPARC_Ca_bdg:Secreted protein acidic and rich in cystei…	GO:0016491(molecular_function:oxidoreductase activity); GO:0055114(biological_process:oxidation-reduction process); GO:0005507(molecular_function:copper ion binding)	gi|902173126|gb|KNA08226.1|( hypothetical protein SOVF_164390 [Spinacia oleracea])	gi|114268|sp|Q00624.1|ASOL_BRANA(RecName: Full=L-ascorbate oxidase homolog; Flags: Precursor)
Phn-m0132-3p	TRINITY_DN92686_c0_g1	1	1	22	1059	1080	AAACGTAAACAACATGATGTAT	|||||||||||||*||||||||	TTTGCATTTGTTGGACTACATA					K03676	grxC, GLRX, GLRX2		PF00462.21(Glutaredoxin:Glutaredoxin)	GO:0005623(cellular_component:cell); GO:0045454(biological_process:cell redox homeostasis); GO:0009055(molecular_function:electron carrier activity); GO:0015035(molecular_function:protein disulfide oxidoreductase activity); GO:0055114(biological_process:oxidation-reduction process)	gi|731364629|ref|XP_010694079.1|( PREDICTED: monothiol glutaredoxin-S1-like [Beta vulgaris subsp. vulgaris])	gi|75181056|sp|Q9LYC8.1|GRXS6_ARATH(RecName: Full=Monothiol glutaredoxin-S6; Short=AtGrxS6; AltName: Full=Protein ROXY 17)
Phn-m0132-3p	TRINITY_DN93240_c3_g3	1	1	22	3111	3132	AAACGTAAACAACATGATGTAT	|||||||||*||||||||||||	TTTGCATTTATTGTACTACATA									GO:0016020(cellular_component:membrane)	gi|731361607|ref|XP_010692449.1|( PREDICTED: uncharacterized protein LOC104905558 [Beta vulgaris subsp. vulgaris])	gi|75265802|sp|Q9SG80.1|ASD1_ARATH(RecName: Full=Alpha-L-arabinofuranosidase 1; Short=AtASD1; AltName: Full=Beta-D-xylosidase; Flags: Precursor)
Phn-m0135-3p	TRINITY_DN93066_c3_g1	1	1	22	1099	1120	TGAGATATCTGATCTTATCCCT	|||||||:|||||||:||||||	ACTCTATGGACTAGAGTAGGGA								PF10536.6(PMD:Plant mobile domain)		gi|731326376|ref|XP_010673988.1|( PREDICTED: serine/threonine-protein phosphatase 7 long form homolog [Beta vulgaris subsp. vulgaris])	gi|75174963|sp|Q9LNG5.1|PPP7L_ARATH(RecName: Full=Serine/threonine-protein phosphatase 7 long form homolog)
Phn-m0154-3p	TRINITY_DN89351_c2_g1	1	1	24	3744	3767	AATTTCAGTCCAAAATAACAGGGC	|||||||||||||||*||||||||	TTAAAGTCAGGTTTTCTTGTCCCG								PF07714.14(Pkinase_Tyr:Protein tyrosine kinase); PF00069.22(Pkinase:Protein kinase domain); PF00954.17(S_locus_glycop:S-locus glycoprotein domain); PF01453.21(B_lectin:D-mannose binding lectin); PF08276.8(PAN_2:PAN-like domain)		gi|731345906|ref|XP_010684168.1|( PREDICTED: G-type lectin S-receptor-like serine/threonine-protein kinase At1g11300 [Beta vulgaris subsp. vulgaris])	gi|75266612|sp|Q9SXB4.1|Y1130_ARATH(RecName: Full=G-type lectin S-receptor-like serine/threonine-protein kinase At1g11300; Flags: Precursor)
Phn-m0154-3p	TRINITY_DN89778_c3_g1	1	1	24	2896	2918	AATTTCAGTCCAAAATAACAGGGC	|||||||:||||||||||||*|||	TTAAAGTTAGGTTTTATTGT-CCG								PF01388.18(ARID:ARID/BRIGHT DNA binding domain)		gi|870869701|gb|KMT20446.1|( hypothetical protein BVRB_1g004400 [Beta vulgaris subsp. vulgaris])	gi|75146722|sp|Q84JT7.1|ARID1_ARATH(RecName: Full=AT-rich interactive domain-containing protein 1; Short=ARID domain-containing protein 1; AltName: Full=ARID and ELM2 domain-containing protein 1)
Phn-m0154-3p	TRINITY_DN92344_c2_g3	1	1	24	3335	3359	AATTTCAGTCCAAAATAACAGGG-C	||||||||||||||||||||:|:*|	TTAAAGTCAGGTTTTATTGTTCTAG										gi|731324270|ref|XP_010672882.1|( PREDICTED: uncharacterized protein At5g39570 isoform X1 [Beta vulgaris subsp. vulgaris])	gi|75171219|sp|Q9FKA5.1|Y5957_ARATH(RecName: Full=Uncharacterized protein At5g39570)
Phn-m0155-5p	TRINITY_DN85860_c0_g1	1	1	24	1565	1588	TTGGAAACAATCTCTTTGTGATAT	|:||||||||:|||||||||||||	AGCCTTTGTTGGAGAAACACTATA								PF07690.13(MFS_1:Major Facilitator Superfamily)	GO:0055085(biological_process:transmembrane transport); GO:0016021(cellular_component:integral component of membrane); GO:0005215(molecular_function:transporter activity)	gi|870856824|gb|KMT08413.1|( hypothetical protein BVRB_6g140900 [Beta vulgaris subsp. vulgaris])	gi|408360265|sp|Q8CIA9.3|MF14B_MOUSE(RecName: Full=Hippocampus abundant transcript-like protein 1; AltName: Full=Major facilitator superfamily domain-containing 14B)
Phn-m0155-5p	TRINITY_DN87872_c2_g1	1	1	24	745	768	TTGGAAACAATCTCTTTGTGATAT	|:||||||||:|||||||||||||	AGCCTTTGTTGGAGAAACACTATA									GO:0015450(molecular_function:P-P-bond-hydrolysis-driven protein transmembrane transporter activity); GO:0005622(cellular_component:intracellular); GO:0006886(biological_process:intracellular protein transport); GO:0019867(cellular_component:outer membrane); GO:0071806(biological_process:protein transmembrane transport)	gi|902217949|gb|KNA17919.1|( hypothetical protein SOVF_075440 [Spinacia oleracea])	gi|75207662|sp|Q9STE8.1|TC753_ARATH(RecName: Full=Protein TOC75-3, chloroplastic; AltName: Full=75 kDa translocon at the outer-envelope-membrane of chloroplasts 3; Short=AtTOC75-III; Flags: Precursor)
Phn-m0155-5p	TRINITY_DN88331_c0_g1	1	1	24	356	379	TTGGAAACAATCTCTTTGTGATAT	:|||||||||:||||||:||||||	GACCTTTGTTGGAGAAATACTATA					K06890	K06890		PF01027.17(Bax1-I:Inhibitor of apoptosis-promoting Bax1)		gi|1025179230|ref|XP_016472344.1|( PREDICTED: BI1-like protein [Nicotiana tabacum])	gi|75164899|sp|Q94A20.1|BI1L_ARATH(RecName: Full=BI1-like protein)
Phn-m0155-5p	TRINITY_DN89055_c1_g3	1	1	24	1957	1980	TTGGAAACAATCTCTTTGTGATAT	||||||||||:|||||||||*|||	AACCTTTGTTGGAGAAACACCATA	COG0561(R:General function prediction only )		COG0561(,hydrolase)					PF02130.14(UPF0054:Uncharacterized protein family UPF0054); PF08282.9(Hydrolase_3:haloacid dehalogenase-like hydrolase)	GO:0004222(molecular_function:metalloendopeptidase activity); GO:0006364(biological_process:rRNA processing); GO:0006508(biological_process:proteolysis)	gi|731317395|ref|XP_010668761.1|( PREDICTED: uncharacterized protein LOC104885860 [Beta vulgaris subsp. vulgaris])	gi|123498733|sp|Q2ILG1.1|YBEY_ANADE(RecName: Full=Endoribonuclease YbeY)
Phn-m0155-5p	TRINITY_DN90661_c2_g2	1	1	24	755	778	TTGGAAACAATCTCTTTGTGATAT	||||||||||:||||||||*||||	AACCTTTGTTGGAGAAACAGTATA								PF04845.10(PurA:PurA ssDNA and RNA-binding protein); PF11680.5(DUF3276:Protein of unknown function (DUF3276))		gi|848885619|ref|XP_012843055.1|( PREDICTED: transcription factor Pur-alpha 1 isoform X1 [Erythranthe guttata])	gi|75206587|sp|Q9SKZ1.2|PUR_ARATH(RecName: Full=Transcription factor Pur-alpha 1; AltName: Full=Purine-rich single-stranded DNA-binding protein alpha 1)
Phn-m0155-5p	TRINITY_DN91036_c2_g1	1	1	24	1049	1072	TTGGAAACAATCTCTTTGTGATAT	|:||||||||:|||||||||||||	AGCCTTTGTTGGAGAAACACTATA	COG0697(G:Carbohydrate transport and metabolism); COG0697(E:Amino acid transport and metabolism)		COG0697(membrane); COG0697(membrane)		K15272	SLC35A1_2_3		PF04142.12(Nuc_sug_transp:Nucleotide-sugar transporter); PF00892.17(EamA:EamA-like transporter family); PF08449.8(UAA:UAA transporter family)	GO:0000139(cellular_component:Golgi membrane); GO:0005351(molecular_function:sugar:proton symporter activity); GO:0008643(biological_process:carbohydrate transport); GO:0015992(biological_process:proton transport); GO:0016021(cellular_component:integral component of membrane)	gi|902161173|gb|KNA06536.1|( hypothetical protein SOVF_180170 [Spinacia oleracea])	gi|75253283|sp|Q654D9.1|CSTR1_ORYSJ(RecName: Full=CMP-sialic acid transporter 1; Short=CMP-SA-Tr 1; Short=CMP-Sia-Tr 1; AltName: Full=CMP-sialic acid transporter-like protein 1; Short=OsCSTLP1)
Phn-m0155-5p	TRINITY_DN92812_c1_g2	1	1	24	419	442	TTGGAAACAATCTCTTTGTGATAT	|::|||||||||||||||||||||	AGTCTTTGTTAGAGAAACACTATA		NOG07125(A:RNA processing and modification )		NOG07125(cleavage and polyadenylation specificity factor subunit)	K14397	NUDT21, CPSF5, CFIM25	map03015(mRNA surveillance pathway)	PF13869.3(NUDIX_2:Nucleotide hydrolase)	GO:0006378(biological_process:mRNA polyadenylation); GO:0003729(molecular_function:mRNA binding); GO:0005849(cellular_component:mRNA cleavage factor complex); GO:0016787(molecular_function:hydrolase activity)	gi|731311961|ref|XP_010671957.1|( PREDICTED: pre-mRNA cleavage factor Im 25 kDa subunit 2 [Beta vulgaris subsp. vulgaris])	gi|75151275|sp|Q8GXS3.1|CFIS2_ARATH(RecName: Full=Pre-mRNA cleavage factor Im 25 kDa subunit 2)
Phn-m0156-5p	TRINITY_DN91632_c2_g1	1	1	23	128	150	TTAAATTACATGTTTGGCAAATA	||||||||*||||||||||||||	AATTTAATCTACAAACCGTTTAT	COG3961(H:Coenzyme transport and metabolism); COG3961(G:Carbohydrate transport and metabolism)		COG3961(Pyruvate decarboxylase); COG3961(Pyruvate decarboxylase)		K01568	PDC, pdc	map00010(Glycolysis / Gluconeogenesis)	PF00205.19(TPP_enzyme_M:Thiamine pyrophosphate enzyme, central domain)	GO:0016831(molecular_function:carboxy-lyase activity); GO:0000287(molecular_function:magnesium ion binding); GO:0030976(molecular_function:thiamine pyrophosphate binding)	gi|33149681|gb|AAP96920.1|( pyruvate decarboxylase [Dianthus caryophyllus])	gi|75100743|sp|O82647.1|PDC1_ARATH(RecName: Full=Pyruvate decarboxylase 1; Short=AtPDC1)
Phn-m0170-3p	TRINITY_DN87219_c7_g1	1	1	23	72	94	AAGGGAGGTTCCATCCTAAAACC	|||||||*|||||||||||||||	TTCCCTCAAAGGTAGGATTTTGG								PF03248.10(Rer1:Rer1 family)	GO:0016020(cellular_component:membrane)	gi|976899289|gb|KVH87874.1|( hypothetical protein Ccrd_024806 [Cynara cardunculus var. scolymus])	gi|6225938|sp|O48670.1|RER1A_ARATH(RecName: Full=Protein RER1A; Short=AtRER1A)
Phn-m0170-3p	TRINITY_DN89985_c4_g1	1	1	23	3364	3386	AAGGGAGGTTCCATCCTAAAACC	|||||||||||*|||||||||||	TTCCCTCCAAGATAGGATTTTGG	COG5329(T:Signal transduction mechanisms )		COG5329(Phosphatase)					PF02383.15(Syja_N:SacI homology domain); PF00397.23(WW:WW domain)	GO:0042578(molecular_function:phosphoric ester hydrolase activity)	gi|731323480|ref|XP_010672452.1|( PREDICTED: probable phosphoinositide phosphatase SAC9 [Beta vulgaris subsp. vulgaris])	gi|75145696|sp|Q7XZU0.1|SAC9_ARATH(RecName: Full=Probable phosphoinositide phosphatase SAC9; Short=AtSAC9; AltName: Full=Protein SUPPRESSOR OF ACTIN 9; AltName: Full=SAC domain protein 9)
Phn-m0170-3p	TRINITY_DN93055_c2_g2	1	1	23	1110	1132	AAGGGAGGTTCCATCCTAAAACC	|||||||*|||||||||||||||	TTCCCTCAAAGGTAGGATTTTGG								PF00069.22(Pkinase:Protein kinase domain); PF07714.14(Pkinase_Tyr:Protein tyrosine kinase)	GO:0016491(molecular_function:oxidoreductase activity); GO:0006468(biological_process:protein phosphorylation); GO:0005524(molecular_function:ATP binding); GO:0016021(cellular_component:integral component of membrane); GO:0004674(molecular_function:protein serine/threonine kinase activity)	gi|902198048|gb|KNA13589.1|( hypothetical protein SOVF_115320 [Spinacia oleracea])	gi|264664489|sp|C0LGP4.1|Y3475_ARATH(RecName: Full=Probable LRR receptor-like serine/threonine-protein kinase At3g47570; Flags: Precursor)
Phn-m0170-3p	TRINITY_DN93055_c2_g2	1	1	23	68	90	AAGGGAGGTTCCATCCTAAAACC	|||||||*|||||||||||||||	TTCCCTCAAAGGTAGGATTTTGG								PF00069.22(Pkinase:Protein kinase domain); PF07714.14(Pkinase_Tyr:Protein tyrosine kinase)	GO:0016491(molecular_function:oxidoreductase activity); GO:0006468(biological_process:protein phosphorylation); GO:0005524(molecular_function:ATP binding); GO:0016021(cellular_component:integral component of membrane); GO:0004674(molecular_function:protein serine/threonine kinase activity)	gi|902198048|gb|KNA13589.1|( hypothetical protein SOVF_115320 [Spinacia oleracea])	gi|264664489|sp|C0LGP4.1|Y3475_ARATH(RecName: Full=Probable LRR receptor-like serine/threonine-protein kinase At3g47570; Flags: Precursor)
Phn-m0173-5p	TRINITY_DN86966_c1_g1	1	1	23	607	629	TCGAACTCCTGACCACTTGGTTA	|*|||||||||||||||||||||	ACCTTGAGGACTGGTGAACCAAT										gi|731358455|ref|XP_010690759.1|( PREDICTED: B-box zinc finger protein 19-like isoform X1 [Beta vulgaris subsp. vulgaris])	gi|704000340|sp|C0SVM5.1|BBX19_ARATH(RecName: Full=B-box zinc finger protein 19; AltName: Full=Protein DOUBLE B-BOX 1B; AltName: Full=Protein SALT TOLERANCE HOMOLOG 5)
Phn-m0173-5p	TRINITY_DN87898_c2_g2	1	1	23	123	145	TCGAACTCCTGACCACTTGGTTA	||:|||:||||||||||||||||	AGTTTGGGGACTGGTGAACCAAT					K07204	RAPTOR				gi|697139440|ref|XP_009623809.1|( PREDICTED: regulatory-associated protein of TOR 1-like isoform X3 [Nicotiana tomentosiformis])	gi|334351171|sp|Q9LZW9.2|RTOR2_ARATH(RecName: Full=Regulatory-associated protein of TOR 2; AltName: Full=Protein RAPTOR 1A; Short=AtRaptor1a; AltName: Full=Protein RAPTOR 2)
Phn-m0173-5p	TRINITY_DN87898_c6_g4	1	1	23	1368	1390	TCGAACTCCTGACCACTTGGTTA	||||||||||||*||||||||||	AGCTTGAGGACTAGTGAACCAAT					K03671	trxA		PF00085.17(Thioredoxin:Thioredoxin); PF13098.3(Thioredoxin_2:Thioredoxin-like domain); PF13905.3(Thioredoxin_8:Thioredoxin-like); PF13728.3(TraF:F plasmid transfer operon protein); PF14595.3(Thioredoxin_9:Thioredoxin); PF00578.18(AhpC-TSA:AhpC/TSA family)	GO:0005623(cellular_component:cell); GO:0045454(biological_process:cell redox homeostasis); GO:0015035(molecular_function:protein disulfide oxidoreductase activity); GO:0006662(biological_process:glycerol ether metabolic process); GO:0055114(biological_process:oxidation-reduction process)	gi|902181316|gb|KNA09716.1|( hypothetical protein SOVF_151150 [Spinacia oleracea])	gi|75333666|sp|Q9CAS1.1|TRXH8_ARATH(RecName: Full=Thioredoxin H8; Short=AtTrxh8)
Phn-m0185-3p	TRINITY_DN92183_c2_g4	1	1	22	175	196	ATGAGACAAAAACCATGAATTG	|||*||||||||||||||||||	TACCCTGTTTTTGGTACTTAAC								PF13855.3(LRR_8:Leucine rich repeat); PF12799.4(LRR_4:Leucine Rich repeats (2 copies)); PF08263.9(LRRNT_2:Leucine rich repeat N-terminal domain); PF00560.30(LRR_1:Leucine Rich Repeat)		gi|731323958|ref|XP_010672708.1|( PREDICTED: polygalacturonase inhibitor-like [Beta vulgaris subsp. vulgaris])	gi|464367|sp|Q05091.1|PGIP_PYRCO(RecName: Full=Polygalacturonase inhibitor; AltName: Full=Polygalacturonase-inhibiting protein; Short=PGIG; Flags: Precursor)
Phn-m0196-3p	TRINITY_DN92355_c1_g7	1	1	24	81	104	AGGGTGTGTTTGGATAGACAAATT	||||||||||||||||||*||*||	TCCCACACAAACCTATCTCTTAAA					K17964	LRPPRC				gi|731326856|ref|XP_010674229.1|( PREDICTED: putative pentatricopeptide repeat-containing protein At1g12700, mitochondrial [Beta vulgaris subsp. vulgaris])	gi|193806393|sp|P0C7Q7.1|PPR38_ARATH(RecName: Full=Putative pentatricopeptide repeat-containing protein At1g12700, mitochondrial; Flags: Precursor)
Phn-m0244-5p	TRINITY_DN92523_c1_g2	1	1	24	2475	2497	CTGAGATTTCTATTGTTTGCACAT	||||||||||||||:||*||||||	GACTCTAAAGATAATAA-CGTGTA					K13065	E2.3.1.133, HCT	map00941(Flavonoid biosynthesis); map00940(Phenylpropanoid biosynthesis); map00945(Stilbenoid, diarylheptanoid and gingerol biosynthesis)	PF02458.12(Transferase:Transferase family)		gi|731324106|ref|XP_010672788.1|( PREDICTED: shikimate O-hydroxycinnamoyltransferase-like [Beta vulgaris subsp. vulgaris])	gi|50400251|sp|O24645.1|HCBT1_DIACA(RecName: Full=Anthranilate N-benzoyltransferase protein 1; AltName: Full=Anthranilate N-hydroxycinnamoyl/benzoyltransferase 1)
Phn-m0246-5p	TRINITY_DN93227_c3_g2	1	1	22	3168	3189	TTAGCCAAGTATCACGAGATCT	|||:||||||||||||||||*|	AATTGGTTCATAGTGCTCTAAA								PF00078.24(RVT_1:Reverse transcriptase (RNA-dependent DNA polymerase)); PF13456.3(RVT_3:Reverse transcriptase-like); PF00665.23(rve:Integrase core domain); PF00075.21(RNase_H:RNase H)		gi|731345230|ref|XP_010683813.1|( PREDICTED: uncharacterized protein LOC104898425 [Beta vulgaris subsp. vulgaris])	gi|146291076|sp|Q7LHG5.2|YI31B_YEAST(RecName: Full=Transposon Ty3-I Gag-Pol polyprotein; AltName: Full=Gag3-Pol3; AltName: Full=Transposon Ty3-2 TYA-TYB polyprotein; Contains: RecName: Full=Capsid protein; Short=CA; AltName: Full=p24; Contains: RecName: Full=Spacer peptide p3; Contains: RecName: Full=Nucleocapsid protein p11; Short=NC; Contains: RecName: Full=Ty3 protease; Short=PR; AltName: Full…
Phn-m0253-3p	TRINITY_DN87085_c2_g1	1	1	21	377	397	AAACTCAACTCAGGGCAGTCT	|||||||||||||*|||||||	TTTGAGTTGAGTCACGTCAGA		NOG16738(S:Function unknown )		NOG16738(Pentatricopeptide repeat-containing protein)				PF14432.3(DYW_deaminase:DYW family of nucleic acid deaminases); PF01535.17(PPR:PPR repeat); PF13041.3(PPR_2:PPR repeat family); PF13812.3(PPR_3:Pentatricopeptide repeat domain); PF12854.4(PPR_1:PPR repeat); PF17177.1(PPR_long:Pentacotripeptide-repeat region of PROPR)	GO:0008270(molecular_function:zinc ion binding)	gi|902214034|gb|KNA17407.1|( hypothetical protein SOVF_080210 isoform A [Spinacia oleracea])	gi|218546768|sp|Q8S9M4.2|PP198_ARATH(RecName: Full=Pentatricopeptide repeat-containing protein At2g41080)
Phn-m0281-5p	TRINITY_DN90289_c0_g6	1	1	22	1002	1023	ATTCAGTCTAAAAGAACATGGT	*|||||||:|||||||||||||	AAAGTCAGGTTTTCTTGTACCA								PF00078.24(RVT_1:Reverse transcriptase (RNA-dependent DNA polymerase))		gi|731347704|ref|XP_010685123.1|( PREDICTED: uncharacterized protein LOC104899606 [Beta vulgaris subsp. vulgaris])	gi|126296|sp|P08548.1|LIN1_NYCCO(RecName: Full=LINE-1 reverse transcriptase homolog)
Phn-m0281-5p	TRINITY_DN91587_c1_g1	1	1	22	515	536	ATTCAGTCTAAAAGAACATGGT	*||||||||||||||||*||||	AAAGTCAGATTTTCTTGCACCA					K16280	RGLG			GO:0008270(molecular_function:zinc ion binding)	gi|902239756|gb|KNA25698.1|( hypothetical protein SOVF_003210 [Spinacia oleracea])	gi|75207472|sp|Q9SS90.1|RGLG1_ARATH(RecName: Full=E3 ubiquitin-protein ligase RGLG1; AltName: Full=RING domain ligase 1)
Phn-m0013-3p	TRINITY_DN92791_c2_g3	1.2	1	22	174	195	ACGTAAACAAATGACTGGAACG	|||||||||||||||||*||*:	TGCATTTGTTTACTGACGTTTT											gi|75299737|sp|Q8H102.1|BH128_ARATH(RecName: Full=Transcription factor bHLH128; AltName: Full=Basic helix-loop-helix protein 128; Short=AtbHLH128; Short=bHLH 128; AltName: Full=Transcription factor EN 74; AltName: Full=bHLH transcription factor bHLH128)
Phn-m0036-5p	TRINITY_DN139741_c0_g1	1.2	1	23	716	739	ATGGACTGGATCTGGATT-GGATC	||||||:|||||||||||*:||||	TACCTGGCCTAGACCTAAGTCTAG					K00797	speE, SRM	map00270(Cysteine and methionine metabolism); map00480(Glutathione metabolism); map00330(Arginine and proline metabolism); map00410(beta-Alanine metabolism)		GO:0003824(molecular_function:catalytic activity)	gi|922381582|ref|XP_013461020.1|( spermidine synthase [Medicago truncatula])	gi|6094330|sp|O48659.1|SPD2_HYONI(RecName: Full=Spermidine synthase 2; Short=SPDSY 2; AltName: Full=Putrescine aminopropyltransferase 2)
Phn-m0049-5p	TRINITY_DN91801_c2_g3	1.2	1	24	570	593	ATCCGTTGGATATGGACTGGATCT	||||||||:||||||||||:||*|	TAGGCAACTTATACCTGACTTAAA		NOG62815(S:Function unknown )		NOG62815(stress responsive alpha-beta barrel domain-containing protein)				PF07876.9(Dabb:Stress responsive A/B Barrel Domain)		gi|902239331|gb|KNA25561.1|( hypothetical protein SOVF_005560 [Spinacia oleracea])	gi|51316534|sp|Q9LUV2.1|POP3_ARATH(RecName: Full=Stress-response A/B barrel domain-containing protein HS1; AltName: Full=Pop3 family protein At3g17210; AltName: Full=Protein HEAT STABLE 1; Short=AtHS1)
Phn-m0069-3p	TRINITY_DN87211_c2_g8	1.2	1	23	992	1014	AAACAACCTGATGTATCGGAGGG	|||||||||:|||||||:|||*|	TTTGTTGGATTACATAGTCTCGC										gi|125603077|gb|EAZ42402.1|( hypothetical protein OsJ_26980 [Oryza sativa Japonica Group])	gi|75098820|sp|O49636.1|MPC4_ARATH(RecName: Full=Mitochondrial pyruvate carrier 4)
Phn-m0069-3p	TRINITY_DN88713_c2_g4	1.2	1	23	504	526	AAACAACCTGATGTATCGGAGGG	||||||||||||||||*|||||:	TTTGTTGGACTACATAACCTCCT					K17913	CCD8	map00906(Carotenoid biosynthesis)			gi|731317284|ref|XP_010668385.1|( PREDICTED: carotenoid cleavage dioxygenase 8 homolog B, chloroplastic [Beta vulgaris subsp. vulgaris])	gi|75156392|sp|Q8LIY8.1|CCD8B_ORYSJ(RecName: Full=Carotenoid cleavage dioxygenase 8 homolog B, chloroplastic; Short=OsCCD8b; AltName: Full=Protein DWARF-10; AltName: Full=Protein MAX4 homolog; Flags: Precursor)
Phn-m0069-3p	TRINITY_DN90150_c1_g2	1.2	1	23	2132	2154	AAACAACCTGATGTATCGGAGGG	|||||||||:||:|||||||||:	TTTGTTGGATTATATAGCCTCCT					K14545	RRP7	map03008(Ribosome biogenesis in eukaryotes)	PF12923.4(RRP7:Ribosomal RNA-processing protein 7 (RRP7))		gi|902188678|gb|KNA11211.1|( hypothetical protein SOVF_137280 isoform A [Spinacia oleracea])	gi|66773938|sp|Q9D1C9.1|RRP7A_MOUSE(RecName: Full=Ribosomal RNA-processing protein 7 homolog A; AltName: Full=Gastric cancer antigen Zg14 homolog)
Phn-m0069-3p	TRINITY_DN90376_c3_g1	1.2	1	23	36	58	AAACAACCTGATGTATCGGAGGG	|||*|||||||||||||:|||||	TTTTTTGGACTACATAGTCTCCC		NOG68963(S:Function unknown )		NOG68963()					GO:0005736(cellular_component:DNA-directed RNA polymerase I complex); GO:0001054(molecular_function:RNA polymerase I activity)	gi|731362101|ref|XP_010692717.1|( PREDICTED: uncharacterized protein LOC104905781 [Beta vulgaris subsp. vulgaris])	gi|74859190|sp|Q55FA4.1|RPA43_DICDI(RecName: Full=Probable DNA-directed RNA polymerase I subunit RPA43)
Phn-m0069-3p	TRINITY_DN90399_c4_g4	1.2	1	23	777	799	AAACAACCTGATGTATCGGAGGG	|||||||||:|||||||:||::|	TTTGTTGGATTACATAGTCTTTC									GO:0000278(biological_process:mitotic cell cycle); GO:0005774(cellular_component:vacuolar membrane); GO:0009908(biological_process:flower development); GO:0009735(biological_process:response to cytokinin); GO:0007166(biological_process:cell surface receptor signaling pathway); GO:0007202(biological_process:activation of phospholipase C activity); GO:0032960(biological_process:regulation of inosit…	gi|731362699|ref|XP_010693024.1|( PREDICTED: G-protein coupled receptor 1 [Beta vulgaris subsp. vulgaris])	gi|75219002|sp|O04714.1|GCR1_ARATH(RecName: Full=G-protein coupled receptor 1)
Phn-m0069-3p	TRINITY_DN90759_c4_g3	1.2	1	23	1037	1059	AAACAACCTGATGTATCGGAGGG	|||||||*||||||||||||||:	TTTGTTGTACTACATAGCCTCCT		NOG08754(S:Function unknown )		NOG08754(Family with sequence similarity 91, member A1)				PF14647.3(FAM91_N:FAM91 N-terminus); PF14648.3(FAM91_C:FAM91 C-terminus)		gi|731312672|ref|XP_010675835.1|( PREDICTED: protein FAM91A1 isoform X1 [Beta vulgaris subsp. vulgaris])	gi|123797490|sp|Q3UVG3.1|F91A1_MOUSE(RecName: Full=Protein FAM91A1)
Phn-m0075-3p	TRINITY_DN90239_c1_g1	1.2	1	24	1919	1942	AAAGAACCGTTGTTTGCATACGAC	|||||||||||||*|||||||:||	TTTCTTGGCAACATACGTATGTTG										gi|731337708|ref|XP_010679934.1|( PREDICTED: transcription factor bHLH121 [Beta vulgaris subsp. vulgaris])	gi|75335440|sp|Q9LT23.1|BH121_ARATH(RecName: Full=Transcription factor bHLH121; AltName: Full=Basic helix-loop-helix protein 121; Short=AtbHLH121; Short=bHLH 121; AltName: Full=Transcription factor EN 138; AltName: Full=bHLH transcription factor bHLH121)
Phn-m0077-5p	TRINITY_DN86989_c2_g2	1.2	1	24	4357	4380	ATCGACGCAATCTTCACCTTGGGT	|||:||||||||||||||||*|:|	TAGTTGCGTTAGAAGTGGAAACTA	COG0260(E:Amino acid transport and metabolism )		COG0260(Presumably involved in the processing and regular turnover of intracellular proteins. Catalyzes the removal of unsubstituted N-terminal amino acids from various peptides (By similarity))		K01255	CARP, pepA	map00480(Glutathione metabolism)	PF00883.18(Peptidase_M17:Cytosol aminopeptidase family, catalytic domain); PF02789.14(Peptidase_M17_N:Cytosol aminopeptidase family, N-terminal domain)	GO:0005737(cellular_component:cytoplasm); GO:0006508(biological_process:proteolysis); GO:0030145(molecular_function:manganese ion binding); GO:0008235(molecular_function:metalloexopeptidase activity); GO:0004177(molecular_function:aminopeptidase activity)	gi|731352776|ref|XP_010687715.1|( PREDICTED: leucine aminopeptidase 1-like [Beta vulgaris subsp. vulgaris])	gi|231536|sp|P30184.1|AMPL1_ARATH(RecName: Full=Leucine aminopeptidase 1; AltName: Full=Leucyl aminopeptidase 1; Short=AtLAP1; AltName: Full=Proline aminopeptidase 1; AltName: Full=Prolyl aminopeptidase 1)
Phn-m0077-5p	TRINITY_DN86989_c2_g2	1.2	1	24	4077	4100	ATCGACGCAATCTTCACCTTGGGT	|||:||||||||||||||||*|:|	TAGTTGCGTTAGAAGTGGAAACTA	COG0260(E:Amino acid transport and metabolism )		COG0260(Presumably involved in the processing and regular turnover of intracellular proteins. Catalyzes the removal of unsubstituted N-terminal amino acids from various peptides (By similarity))		K01255	CARP, pepA	map00480(Glutathione metabolism)	PF00883.18(Peptidase_M17:Cytosol aminopeptidase family, catalytic domain); PF02789.14(Peptidase_M17_N:Cytosol aminopeptidase family, N-terminal domain)	GO:0005737(cellular_component:cytoplasm); GO:0006508(biological_process:proteolysis); GO:0030145(molecular_function:manganese ion binding); GO:0008235(molecular_function:metalloexopeptidase activity); GO:0004177(molecular_function:aminopeptidase activity)	gi|731352776|ref|XP_010687715.1|( PREDICTED: leucine aminopeptidase 1-like [Beta vulgaris subsp. vulgaris])	gi|231536|sp|P30184.1|AMPL1_ARATH(RecName: Full=Leucine aminopeptidase 1; AltName: Full=Leucyl aminopeptidase 1; Short=AtLAP1; AltName: Full=Proline aminopeptidase 1; AltName: Full=Prolyl aminopeptidase 1)
Phn-m0082-3p	TRINITY_DN87952_c0_g1	1.2	1	22	2777	2798	AACGTGAACAATCTGATGTATC	|||||:|||||:|||||:||||	TTGCATTTGTTGGACTATATAG								PF00643.21(zf-B_box:B-box zinc finger)		gi|902193964|gb|KNA12426.1|( hypothetical protein SOVF_126070 [Spinacia oleracea])	gi|52788299|sp|Q9SYM2.2|BBX22_ARATH(RecName: Full=B-box zinc finger protein 22; AltName: Full=Protein DOUBLE B-BOX 3; AltName: Full=Protein LIGHT-REGULATED ZINC FINGER PROTEIN 1; AltName: Full=Protein SALT TOLERANCE HOMOLOG 3)
Phn-m0082-3p	TRINITY_DN88562_c0_g1	1.2	1	22	684	705	AACGTGAACAATCTGATGTATC	|||||:|||||||||||:|||*	TTGCATTTGTTAGACTATATAA								PF00036.29(EF-hand_1:EF hand); PF13202.3(EF-hand_5:EF hand); PF13405.3(EF-hand_6:EF-hand domain); PF13499.3(EF-hand_7:EF-hand domain pair); PF13833.3(EF-hand_8:EF-hand domain pair)		gi|902233323|gb|KNA22997.1|( hypothetical protein SOVF_028870 [Spinacia oleracea])	gi|75337714|sp|Q9SVG9.1|CML42_ARATH(RecName: Full=Calcium-binding protein CML42; AltName: Full=Calmodulin-like protein 42)
Phn-m0087-5p	TRINITY_DN86827_c2_g4	1.2	1	22	625	646	TAAGGCCATGTTCTTTTGGACT	|||||||*||||||||||:|||	ATTCCGGCACAAGAAAACTTGA										gi|802620800|ref|XP_012075714.1|( PREDICTED: amino-acid permease BAT1 homolog isoform X2 [Jatropha curcas])	gi|403399734|sp|B9EXZ6.1|BAT1_ORYSJ(RecName: Full=Amino-acid permease BAT1 homolog)
Phn-m0087-5p	TRINITY_DN88477_c3_g1	1.2	1	22	50	71	TAAGGCCATGTTCTTTTGGACT	|*||||||||||||||||:|||	AATCCGGTACAAGAAAACTTGA											gi|12643284|sp|P47998.2|CYSK1_ARATH(RecName: Full=Cysteine synthase 1; AltName: Full=At.OAS.5-8; AltName: Full=Beta-substituted Ala synthase 1;1; Short=ARAth-Bsas1;1; AltName: Full=CSase A; Short=AtCS-A; AltName: Full=Cys-3A; AltName: Full=O-acetylserine (thiol)-lyase 1; Short=OAS-TL A; AltName: Full=O-acetylserine sulfhydrylase; AltName: Full=Protein ONSET OF LEAF DEATH 3)
Phn-m0087-5p	TRINITY_DN88575_c2_g2	1.2	1	22	1866	1887	TAAGGCCATGTTCTTTTGGACT	||||:|||||||||||||:*||	ATTCTGGTACAAGAAAACTAGA	COG0318(I:Lipid transport and metabolism )		COG0318(Amp-dependent synthetase and ligase)					PF00501.25(AMP-binding:AMP-binding enzyme); PF13193.3(AMP-binding_C:AMP-binding enzyme C-terminal domain)	GO:0005777(cellular_component:peroxisome); GO:0008152(biological_process:metabolic process); GO:0003824(molecular_function:catalytic activity)	gi|902237913|gb|KNA24977.1|( hypothetical protein SOVF_010740 [Spinacia oleracea])	gi|378548264|sp|F4HUK6.1|AAE1_ARATH(RecName: Full=Probable acyl-activating enzyme 1, peroxisomal; AltName: Full=AMP-binding protein 1; Short=AtAMPBP1)
Phn-m0087-5p	TRINITY_DN88774_c1_g1	1.2	1	22	117	138	TAAGGCCATGTTCTTTTGGACT	|*|||||||||||||||:||||	AATCCGGTACAAGAAAATCTGA					K15095	E1.1.1.208	map00902(Monoterpenoid biosynthesis)	PF00106.22(adh_short:short chain dehydrogenase)		gi|731311943|ref|XP_010671895.1|( PREDICTED: (+)-neomenthol dehydrogenase-like [Beta vulgaris subsp. vulgaris])	gi|75311801|sp|Q9M2E2.1|SDR1_ARATH(RecName: Full=(+)-neomenthol dehydrogenase; AltName: Full=Menthone:neomenthol reductase; AltName: Full=Short-chain dehydrogenase/reductase 1; Short=AtSDR1)
Phn-m0087-5p	TRINITY_DN89027_c1_g1	1.2	1	22	67	88	TAAGGCCATGTTCTTTTGGACT	|||||||*||||||||||:|||	ATTCCGGGACAAGAAAACTTGA		NOG04274(R:General function prediction only )		NOG04274(dolichyl-diphosphooligosaccharide-protein glycosyltransferase subunit)	K12666	OST1, RPN1	map00510(N-Glycan biosynthesis); map04141(Protein processing in endoplasmic reticulum)	PF04597.11(Ribophorin_I:Ribophorin I)	GO:0005789(cellular_component:endoplasmic reticulum membrane); GO:0006486(biological_process:protein glycosylation); GO:0016021(cellular_component:integral component of membrane); GO:0004579(molecular_function:dolichyl-diphosphooligosaccharide-protein glycotransferase activity)	gi|902155338|gb|KNA05890.1|( hypothetical protein SOVF_186180 [Spinacia oleracea])	gi|75272069|sp|Q9ZUA0.1|OST1B_ARATH(RecName: Full=Dolichyl-diphosphooligosaccharide--protein glycosyltransferase subunit 1B; AltName: Full=Ribophorin IB; Short=RPN-IB; AltName: Full=Ribophorin-1B; Flags: Precursor)
Phn-m0087-5p	TRINITY_DN90613_c2_g1	1.2	1	22	194	215	TAAGGCCATGTTCTTTTGGACT	|||||*||||||||||||:|||	ATTCCAGTACAAGAAAACTTGA								PF03016.12(Exostosin:Exostosin family)	GO:0016021(cellular_component:integral component of membrane)	gi|731353874|ref|XP_010688286.1|( PREDICTED: probable glycosyltransferase At5g03795 [Beta vulgaris subsp. vulgaris])	gi|292630778|sp|Q9FFN2.2|GLYT3_ARATH(RecName: Full=Probable glycosyltransferase At5g03795)
Phn-m0087-5p	TRINITY_DN90823_c4_g1	1.2	1	22	1962	1983	TAAGGCCATGTTCTTTTGGACT	||||||||||||||||*|:|||	ATTCCGGTACAAGAAACCTTGA					K01285	PRCP		PF05577.9(Peptidase_S28:Serine carboxypeptidase S28)	GO:0008238(molecular_function:exopeptidase activity); GO:0008236(molecular_function:serine-type peptidase activity)	gi|225448871|ref|XP_002270231.1|( PREDICTED: lysosomal Pro-X carboxypeptidase [Vitis vinifera])	gi|122137021|sp|Q2TA14.1|PCP_BOVIN(RecName: Full=Lysosomal Pro-X carboxypeptidase; AltName: Full=Proline carboxypeptidase; AltName: Full=Prolylcarboxypeptidase; Short=PRCP; Flags: Precursor)
Phn-m0087-5p	TRINITY_DN93158_c2_g1	1.2	1	22	74	95	TAAGGCCATGTTCTTTTGGACT	|||||*|||||||||||:||||	ATTCCAGTACAAGAAAATCTGA		NOG153798(S:Function unknown )		NOG153798(ZF-HD protein dimerisation region)				PF04770.9(ZF-HD_dimer:ZF-HD protein dimerisation region)		gi|731335031|ref|XP_010678523.1|( PREDICTED: mini zinc finger protein 1 [Beta vulgaris subsp. vulgaris])	gi|75169834|sp|Q9CA51.1|MIF1_ARATH(RecName: Full=Mini zinc finger protein 1; Short=AtMIF1)
Phn-m0090-3p	TRINITY_DN91989_c4_g1	1.2	1	24	2792	2815	AAGAGAATTACAGTCCAAAAGAAC	||||||||||||||||||||:*|*	TTCTCTTAATGTCAGGTTTTTATA	COG1902(C:Energy production and conversion )		COG1902(NADH flavin oxidoreductase, NADH oxidase)		K05894	OPR	map00592(alpha-Linolenic acid metabolism)		GO:0016491(molecular_function:oxidoreductase activity); GO:0055114(biological_process:oxidation-reduction process); GO:0010181(molecular_function:FMN binding)	gi|731372169|ref|XP_010666265.1|( PREDICTED: 12-oxophytodienoate reductase 3-like [Beta vulgaris subsp. vulgaris])	gi|62900706|sp|Q9FEW9.1|OPR3_SOLLC(RecName: Full=12-oxophytodienoate reductase 3; AltName: Full=12-oxophytodienoate-10,11-reductase 3; Short=OPDA-reductase 3; AltName: Full=LeOPR3)
Phn-m0100-5p	TRINITY_DN85953_c3_g4	1.2	1	24	285	308	ACTTAATTAGAGTTGAACCTGAGC	||||||||||||::|||||:||||	TGAATTAATCTCGGCTTGGGCTCG									GO:0016021(cellular_component:integral component of membrane); GO:0016740(molecular_function:transferase activity)	gi|922383196|ref|XP_013461820.1|( xyloglucan glycosyltransferase [Medicago truncatula])	gi|75273615|sp|Q9LJP4.1|CSLC4_ARATH(RecName: Full=Xyloglucan glycosyltransferase 4; AltName: Full=Cellulose synthase-like protein C4; Short=AtCslC4; AltName: Full=Xyloglucan synthase 4)
Phn-m0106-5p	TRINITY_DN92250_c2_g2	1.2	1	22	3018	3039	GGGAATATTGTTTTAATGGATG	|||||||||:|||||||*|||:	CCCTTATAATAAAATTAGCTAT	COG5082(O:Posttranslational modification, protein turnover, chaperones); COG5082(U:Intracellular trafficking, secretion, and vesicular transport)		COG5082(zinc finger); COG5082(zinc finger)		K09250	CNBP		PF00098.20(zf-CCHC:Zinc knuckle); PF13917.3(zf-CCHC_3:Zinc knuckle); PF14392.3(zf-CCHC_4:Zinc knuckle); PF13696.3(zf-CCHC_2:Zinc knuckle)	GO:0005488(molecular_function:binding)	gi|593267495|ref|XP_007135925.1|( hypothetical protein PHAVU_009G003600g [Phaseolus vulgaris])	gi|1730843|sp|P53849.1|GIS2_YEAST(RecName: Full=Zinc finger protein GIS2)
Phn-m0106-5p	TRINITY_DN92829_c1_g1	1.2	1	22	25	46	GGGAATATTGTTTTAATGGATG	|:|||||||:||||||||:|||	CTCTTATAATAAAATTACTTAC					K05681	ABCG2, CD338	map02010(ABC transporters)	PF01061.21(ABC2_membrane:ABC-2 type transporter); PF00005.24(ABC_tran:ABC transporter); PF13304.3(AAA_21:AAA domain, putative AbiEii toxin, Type IV TA system); PF03193.13(DUF258:Protein of unknown function, DUF258)	GO:0042626(molecular_function:ATPase activity, coupled to transmembrane movement of substances); GO:0005886(cellular_component:plasma membrane); GO:0005524(molecular_function:ATP binding); GO:0016021(cellular_component:integral component of membrane)	gi|731338253|ref|XP_010680229.1|( PREDICTED: ABC transporter G family member 5 [Beta vulgaris subsp. vulgaris])	gi|75337284|sp|Q9SIT6.1|AB5G_ARATH(RecName: Full=ABC transporter G family member 5; Short=ABC transporter ABCG.5; Short=AtABCG5; AltName: Full=White-brown complex homolog protein 5; Short=AtWBC5)
Phn-m0107-3p	TRINITY_DN86347_c0_g3	1.2	1	24	2913	2936	AATTAAACGTAAACAATCTGATGT	|||:||||||||||||:||||:||	TTAGTTTGCATTTGTTGGACTGCA								PF12906.4(RINGv:RING-variant domain); PF13639.3(zf-RING_2:Ring finger domain)	GO:0046872(molecular_function:metal ion binding); GO:0016020(cellular_component:membrane)	gi|902183095|gb|KNA10045.1|( hypothetical protein SOVF_148030 isoform B, partial [Spinacia oleracea])	gi|519889692|sp|F4JKK0.1|SUD1_ARATH(RecName: Full=Probable E3 ubiquitin ligase SUD1; AltName: Full=Protein ECERIFERUM 9; AltName: Full=Protein SUPPRESSOR OF DRY2 DEFFECTS 1; Short=AtSUD1; AltName: Full=RING/U-box domain-containing protein)
Phn-m0107-3p	TRINITY_DN87952_c0_g1	1.2	1	24	2780	2803	AATTAAACGTAAACAATCTGATGT	|||:||||||||||||:|||||:|	TTAGTTTGCATTTGTTGGACTATA								PF00643.21(zf-B_box:B-box zinc finger)		gi|902193964|gb|KNA12426.1|( hypothetical protein SOVF_126070 [Spinacia oleracea])	gi|52788299|sp|Q9SYM2.2|BBX22_ARATH(RecName: Full=B-box zinc finger protein 22; AltName: Full=Protein DOUBLE B-BOX 3; AltName: Full=Protein LIGHT-REGULATED ZINC FINGER PROTEIN 1; AltName: Full=Protein SALT TOLERANCE HOMOLOG 3)
Phn-m0107-3p	TRINITY_DN88355_c0_g10	1.2	1	24	139	162	AATTAAACGTAAACAATCTGATGT	||||||||||||||||:*||||:|	TTAATTTGCATTTGTTGAACTATA	COG0137(E:Amino acid transport and metabolism )		COG0137(Citrulline--aspartate ligase)		K01940	argG, ASS1	map00220(Arginine biosynthesis); map00250(Alanine, aspartate and glutamate metabolism)	PF00764.16(Arginosuc_synth:Arginosuccinate synthase)	GO:0006526(biological_process:arginine biosynthetic process); GO:0005524(molecular_function:ATP binding); GO:0004055(molecular_function:argininosuccinate synthase activity)	gi|731317329|ref|XP_010668530.1|( PREDICTED: argininosuccinate synthase, chloroplastic [Beta vulgaris subsp. vulgaris])	gi|78099761|sp|Q9SZX3.3|ASSY_ARATH(RecName: Full=Argininosuccinate synthase, chloroplastic; AltName: Full=Citrulline--aspartate ligase; Flags: Precursor)
Phn-m0107-3p	TRINITY_DN89162_c2_g1	1.2	1	24	3410	3433	AATTAAACGTAAACAATCTGATGT	||||||||||||||*||||:||||	TTAATTTGCATTTGATAGATTACA								PF00190.19(Cupin_1:Cupin)		gi|731336115|ref|XP_010679084.1|( PREDICTED: vicilin-like antimicrobial peptides 2-3 [Beta vulgaris subsp. vulgaris])	gi|548900|sp|Q04672.1|SBP_SOYBN(RecName: Full=Sucrose-binding protein; Short=SBP; Flags: Precursor)
Phn-m0108-3p	TRINITY_DN86347_c0_g3	1.2	1	24	2913	2936	AATTAAACGTAAACAATCTGATGT	|||:||||||||||||:||||:||	TTAGTTTGCATTTGTTGGACTGCA								PF12906.4(RINGv:RING-variant domain); PF13639.3(zf-RING_2:Ring finger domain)	GO:0046872(molecular_function:metal ion binding); GO:0016020(cellular_component:membrane)	gi|902183095|gb|KNA10045.1|( hypothetical protein SOVF_148030 isoform B, partial [Spinacia oleracea])	gi|519889692|sp|F4JKK0.1|SUD1_ARATH(RecName: Full=Probable E3 ubiquitin ligase SUD1; AltName: Full=Protein ECERIFERUM 9; AltName: Full=Protein SUPPRESSOR OF DRY2 DEFFECTS 1; Short=AtSUD1; AltName: Full=RING/U-box domain-containing protein)
Phn-m0108-3p	TRINITY_DN87952_c0_g1	1.2	1	24	2780	2803	AATTAAACGTAAACAATCTGATGT	|||:||||||||||||:|||||:|	TTAGTTTGCATTTGTTGGACTATA								PF00643.21(zf-B_box:B-box zinc finger)		gi|902193964|gb|KNA12426.1|( hypothetical protein SOVF_126070 [Spinacia oleracea])	gi|52788299|sp|Q9SYM2.2|BBX22_ARATH(RecName: Full=B-box zinc finger protein 22; AltName: Full=Protein DOUBLE B-BOX 3; AltName: Full=Protein LIGHT-REGULATED ZINC FINGER PROTEIN 1; AltName: Full=Protein SALT TOLERANCE HOMOLOG 3)
Phn-m0108-3p	TRINITY_DN88355_c0_g10	1.2	1	24	139	162	AATTAAACGTAAACAATCTGATGT	||||||||||||||||:*||||:|	TTAATTTGCATTTGTTGAACTATA	COG0137(E:Amino acid transport and metabolism )		COG0137(Citrulline--aspartate ligase)		K01940	argG, ASS1	map00220(Arginine biosynthesis); map00250(Alanine, aspartate and glutamate metabolism)	PF00764.16(Arginosuc_synth:Arginosuccinate synthase)	GO:0006526(biological_process:arginine biosynthetic process); GO:0005524(molecular_function:ATP binding); GO:0004055(molecular_function:argininosuccinate synthase activity)	gi|731317329|ref|XP_010668530.1|( PREDICTED: argininosuccinate synthase, chloroplastic [Beta vulgaris subsp. vulgaris])	gi|78099761|sp|Q9SZX3.3|ASSY_ARATH(RecName: Full=Argininosuccinate synthase, chloroplastic; AltName: Full=Citrulline--aspartate ligase; Flags: Precursor)
Phn-m0108-3p	TRINITY_DN89162_c2_g1	1.2	1	24	3410	3433	AATTAAACGTAAACAATCTGATGT	||||||||||||||*||||:||||	TTAATTTGCATTTGATAGATTACA								PF00190.19(Cupin_1:Cupin)		gi|731336115|ref|XP_010679084.1|( PREDICTED: vicilin-like antimicrobial peptides 2-3 [Beta vulgaris subsp. vulgaris])	gi|548900|sp|Q04672.1|SBP_SOYBN(RecName: Full=Sucrose-binding protein; Short=SBP; Flags: Precursor)
Phn-m0125-5p	TRINITY_DN84245_c0_g1	1.2	1	24	414	437	ACCGAGTGGTACCGAGTTTCAATA	||*||||||||||||||:||||||	TGACTCACCATGGCTCAGAGTTAT								PF00612.24(IQ:IQ calmodulin-binding motif)		gi|731323444|ref|XP_010672433.1|( PREDICTED: protein IQ-DOMAIN 14 [Beta vulgaris subsp. vulgaris])	gi|75271948|sp|Q8LPG9.1|IQD14_ARATH(RecName: Full=Protein IQ-DOMAIN 14)
Phn-m0129-5p	TRINITY_DN92250_c1_g1	1.2	1	23	2199	2221	AGCTTTCATGTAATGTTTCTGAG	||||||*|||||||||||||||:	TCGAAAATACATTACAAAGACTT		NOG05157(R:General function prediction only )		NOG05157(Ring finger protein)	K10604	MGRN1	map04120(Ubiquitin mediated proteolysis)	PF13920.3(zf-C3HC4_3:Zinc finger, C3HC4 type (RING finger)); PF14447.3(Prok-RING_4:Prokaryotic RING finger family 4); PF13639.3(zf-RING_2:Ring finger domain)	GO:0008270(molecular_function:zinc ion binding)	gi|731345797|ref|XP_010684105.1|( PREDICTED: probable E3 ubiquitin-protein ligase LOG2 [Beta vulgaris subsp. vulgaris])	gi|75313015|sp|Q9S752.1|LOFG2_ARATH(RecName: Full=Probable E3 ubiquitin-protein ligase LOG2; AltName: Full=Protein LOSS OF GDU2; AltName: Full=RING finger protein 215)
Phn-m0132-3p	TRINITY_DN86347_c0_g3	1.2	1	22	2911	2932	AAACGTAAACAACATGATGTAT	|||||||||||||*|||:||||	TTTGCATTTGTTGGACTGCATA								PF12906.4(RINGv:RING-variant domain); PF13639.3(zf-RING_2:Ring finger domain)	GO:0046872(molecular_function:metal ion binding); GO:0016020(cellular_component:membrane)	gi|902183095|gb|KNA10045.1|( hypothetical protein SOVF_148030 isoform B, partial [Spinacia oleracea])	gi|519889692|sp|F4JKK0.1|SUD1_ARATH(RecName: Full=Probable E3 ubiquitin ligase SUD1; AltName: Full=Protein ECERIFERUM 9; AltName: Full=Protein SUPPRESSOR OF DRY2 DEFFECTS 1; Short=AtSUD1; AltName: Full=RING/U-box domain-containing protein)
Phn-m0132-3p	TRINITY_DN86428_c0_g1	1.2	1	22	2988	3009	AAACGTAAACAACATGATGTAT	|||||||||*|||||||||||:	TTTGCATTTCTTGTACTACATG									GO:0008270(molecular_function:zinc ion binding)	gi|902231511|gb|KNA22289.1|( hypothetical protein SOVF_034220 [Spinacia oleracea])	gi|442570029|sp|Q759M1.2|SIP5_ASHGO(RecName: Full=Protein SIP5)
Phn-m0132-3p	TRINITY_DN87355_c2_g1	1.2	1	22	2231	2252	AAACGTAAACAACATGATGTAT	||||||||||||||||*||:||	TTTGCATTTGTTGTACCACGTA					K02147	ATPeV1B, ATP6B	map04145(Phagosome); map00190(Oxidative phosphorylation)		GO:0046034(biological_process:ATP metabolic process); GO:0005524(molecular_function:ATP binding); GO:0016820(molecular_function:hydrolase activity, acting on acid anhydrides, catalyzing transmembrane movement of substances); GO:0015991(biological_process:ATP hydrolysis coupled proton transport); GO:0033180(cellular_component:proton-transporting V-type ATPase, V1 domain)	gi|475587811|gb|EMT20660.1|( V-type proton ATPase subunit B 2 [Aegilops tauschii])	gi|2493132|sp|Q40079.1|VATB2_HORVU(RecName: Full=V-type proton ATPase subunit B 2; Short=V-ATPase subunit B 2; AltName: Full=Vacuolar proton pump subunit B 2)
Phn-m0132-3p	TRINITY_DN87952_c0_g1	1.2	1	22	2778	2799	AAACGTAAACAACATGATGTAT	|||||||||||||*||||:|||	TTTGCATTTGTTGGACTATATA								PF00643.21(zf-B_box:B-box zinc finger)		gi|902193964|gb|KNA12426.1|( hypothetical protein SOVF_126070 [Spinacia oleracea])	gi|52788299|sp|Q9SYM2.2|BBX22_ARATH(RecName: Full=B-box zinc finger protein 22; AltName: Full=Protein DOUBLE B-BOX 3; AltName: Full=Protein LIGHT-REGULATED ZINC FINGER PROTEIN 1; AltName: Full=Protein SALT TOLERANCE HOMOLOG 3)
Phn-m0132-3p	TRINITY_DN88419_c0_g1	1.2	1	22	941	962	AAACGTAAACAACATGATGTAT	||||:|||||||||||||:*||	TTTGTATTTGTTGTACTATCTA		NOG49011(O:Posttranslational modification, protein turnover, chaperones )		NOG49011(biogenesis of lysosome-related organelles complex 1 subunit)	K20185	BLOC1S1		PF06320.10(GCN5L1:GCN5-like protein 1 (GCN5L1))	GO:0031083(cellular_component:BLOC-1 complex)	gi|870853557|gb|KMT05438.1|( hypothetical protein BVRB_7g175650 [Beta vulgaris subsp. vulgaris])	gi|3024583|sp|O22929.1|BL1S1_ARATH(RecName: Full=Biogenesis of lysosome-related organelles complex 1 subunit 1; Short=BLOC-1 subunit 1; AltName: Full=GCN5-like protein 1; AltName: Full=Protein RT14 homolog)
Phn-m0132-3p	TRINITY_DN89421_c1_g1	1.2	1	22	3897	3918	AAACGTAAACAACATGATGTAT	||||||*||||||||||:||||	TTTGCAATTGTTGTACTGCATA										gi|902156741|gb|KNA06038.1|( hypothetical protein SOVF_184720 [Spinacia oleracea])	gi|75180608|sp|Q9LV85.1|CPR5_ARATH(RecName: Full=Protein CPR-5; AltName: Full=Protein constitutive expression of pathogenesis-related genes 5; Short=Protein constitutive expression of PR genes 5; AltName: Full=Protein hypersenescence-1)
Phn-m0150-5p	TRINITY_DN87302_c0_g4	1.2	1	24	1200	1223	ACCATACTGGGACGTGCCTCTAGG	|||||||||||||||*||:|||||	TGGTATGACCCTGCAAGGGGATCC		NOG123237(G:Carbohydrate transport and metabolism )		NOG123237(peroxidase)	K00430	E1.11.1.7	map00940(Phenylpropanoid biosynthesis)	PF00141.20(peroxidase:Peroxidase)	GO:0046872(molecular_function:metal ion binding); GO:0098869(biological_process:cellular oxidant detoxification); GO:0006979(biological_process:response to oxidative stress); GO:0042744(biological_process:hydrogen peroxide catabolic process); GO:0020037(molecular_function:heme binding); GO:0004601(molecular_function:peroxidase activity); GO:0005576(cellular_component:extracellular region); GO:005…	gi|731337449|ref|XP_010679795.1|( PREDICTED: peroxidase 72-like [Beta vulgaris subsp. vulgaris])	gi|26397792|sp|Q9FJZ9.1|PER72_ARATH(RecName: Full=Peroxidase 72; Short=Atperox P72; AltName: Full=ATP6a; AltName: Full=PRXR8; Flags: Precursor)
Phn-m0154-3p	TRINITY_DN86552_c1_g1	1.2	1	24	1115	1138	AATTTCAGTCCAAAATAACAGGGC	|||||||||||||||*|||||:||	TTAAAGTCAGGTTTTCTTGTCTCG		NOG68858(I:Lipid transport and metabolism )		NOG68858(allene oxide cyclase)	K10525	AOC	map00592(alpha-Linolenic acid metabolism)	PF06351.8(Allene_ox_cyc:Allene oxide cyclase)	GO:0009507(cellular_component:chloroplast); GO:0016853(molecular_function:isomerase activity)	gi|731315706|ref|XP_010692623.1|( PREDICTED: allene oxide cyclase 2, chloroplastic-like isoform X2 [Beta vulgaris subsp. vulgaris])	gi|73921671|sp|Q9LS03.1|AOC1_ARATH(RecName: Full=Allene oxide cyclase 1, chloroplastic; AltName: Full=Early-responsive to dehydration 12 protein; Flags: Precursor)
Phn-m0172-3p	TRINITY_DN93265_c5_g1	1.2	1	23	4649	4671	AATGAGAGGTAAACAAATGAATG	|||||||:||||||||||:|||*	TTACTCTTCATTTGTTTATTTAA					K03006	RPB1, POLR2A	map00240(Pyrimidine metabolism); map03020(RNA polymerase); map00230(Purine metabolism)	PF07727.11(RVT_2:Reverse transcriptase (RNA-dependent DNA polymerase)); PF00665.23(rve:Integrase core domain); PF14223.3(Retrotran_gag_2:gag-polypeptide of LTR copia-type)		gi|147804825|emb|CAN71445.1|( hypothetical protein VITISV_042489 [Vitis vinifera])	gi|130582|sp|P10978.1|POLX_TOBAC(RecName: Full=Retrovirus-related Pol polyprotein from transposon TNT 1-94; Includes: RecName: Full=Protease; Includes: RecName: Full=Reverse transcriptase; Includes: RecName: Full=Endonuclease)
Phn-m0189-5p	TRINITY_DN88381_c0_g1	1.2	1	21	1222	1242	TTTTGCATAGGCCATCAAGTA	:||||||:||||||||||*||	GAAACGTGTCCGGTAGTTAAT					K17964	LRPPRC		PF13041.3(PPR_2:PPR repeat family); PF12854.4(PPR_1:PPR repeat); PF01535.17(PPR:PPR repeat); PF13812.3(PPR_3:Pentatricopeptide repeat domain); PF17177.1(PPR_long:Pentacotripeptide-repeat region of PROPR); PF10037.6(MRP-S27:Mitochondrial 28S ribosomal protein S27); PF08579.8(RPM2:Mitochondrial ribonuclease P subunit (RPM2))		gi|731326858|ref|XP_010674231.1|( PREDICTED: putative pentatricopeptide repeat-containing protein At1g12700, mitochondrial [Beta vulgaris subsp. vulgaris])	gi|223635621|sp|Q940A6.2|PP325_ARATH(RecName: Full=Pentatricopeptide repeat-containing protein At4g19440, chloroplastic; Flags: Precursor)
Phn-m0189-5p	TRINITY_DN89449_c0_g2	1.2	1	21	1003	1023	TTTTGCATAGGCCATCAAGTA	:||||||:||||||||||*||	GAAACGTGTCCGGTAGTTAAT					K17964	LRPPRC		PF12854.4(PPR_1:PPR repeat); PF13041.3(PPR_2:PPR repeat family); PF01535.17(PPR:PPR repeat); PF13812.3(PPR_3:Pentatricopeptide repeat domain); PF17177.1(PPR_long:Pentacotripeptide-repeat region of PROPR)		gi|870863100|gb|KMT14277.1|( hypothetical protein BVRB_4g076330 isoform A [Beta vulgaris subsp. vulgaris])	gi|193806393|sp|P0C7Q7.1|PPR38_ARATH(RecName: Full=Putative pentatricopeptide repeat-containing protein At1g12700, mitochondrial; Flags: Precursor)
Phn-m0190-5p	TRINITY_DN88381_c0_g1	1.2	1	21	1222	1242	TTTTGCATAGGCCATCAAGTA	:||||||:||||||||||*||	GAAACGTGTCCGGTAGTTAAT					K17964	LRPPRC		PF13041.3(PPR_2:PPR repeat family); PF12854.4(PPR_1:PPR repeat); PF01535.17(PPR:PPR repeat); PF13812.3(PPR_3:Pentatricopeptide repeat domain); PF17177.1(PPR_long:Pentacotripeptide-repeat region of PROPR); PF10037.6(MRP-S27:Mitochondrial 28S ribosomal protein S27); PF08579.8(RPM2:Mitochondrial ribonuclease P subunit (RPM2))		gi|731326858|ref|XP_010674231.1|( PREDICTED: putative pentatricopeptide repeat-containing protein At1g12700, mitochondrial [Beta vulgaris subsp. vulgaris])	gi|223635621|sp|Q940A6.2|PP325_ARATH(RecName: Full=Pentatricopeptide repeat-containing protein At4g19440, chloroplastic; Flags: Precursor)
Phn-m0190-5p	TRINITY_DN89449_c0_g2	1.2	1	21	1003	1023	TTTTGCATAGGCCATCAAGTA	:||||||:||||||||||*||	GAAACGTGTCCGGTAGTTAAT					K17964	LRPPRC		PF12854.4(PPR_1:PPR repeat); PF13041.3(PPR_2:PPR repeat family); PF01535.17(PPR:PPR repeat); PF13812.3(PPR_3:Pentatricopeptide repeat domain); PF17177.1(PPR_long:Pentacotripeptide-repeat region of PROPR)		gi|870863100|gb|KMT14277.1|( hypothetical protein BVRB_4g076330 isoform A [Beta vulgaris subsp. vulgaris])	gi|193806393|sp|P0C7Q7.1|PPR38_ARATH(RecName: Full=Putative pentatricopeptide repeat-containing protein At1g12700, mitochondrial; Flags: Precursor)
Phn-m0220-5p	TRINITY_DN86288_c1_g10	1.2	1	24	47	70	AAGGCACTGGGATAATGTTGTTGT	|||||||||||*|||||||:||||	TTCCGTGACCCCATTACAATAACA										gi|870865970|gb|KMT16999.1|( hypothetical protein BVRB_2g042040 isoform A [Beta vulgaris subsp. vulgaris])	gi|75329674|sp|Q8L518.1|CK2_ARATH(RecName: Full=Probable choline kinase 2)
Phn-m0220-5p	TRINITY_DN86930_c1_g3	1.2	1	24	3443	3466	AAGGCACTGGGATAATGTTGTTGT	||||||*||||||||||:||||||	TTCCGTAACCCTATTACGACAACA		NOG131202(S:Function unknown )		NOG131202(glucan endo-1-3-beta-glucosidase)				PF00332.15(Glyco_hydro_17:Glycosyl hydrolases family 17); PF02298.14(Cu_bind_like:Plastocyanin-like domain)	GO:0016021(cellular_component:integral component of membrane); GO:0005975(biological_process:carbohydrate metabolic process); GO:0004553(molecular_function:hydrolase activity, hydrolyzing O-glycosyl compounds)	gi|731353233|ref|XP_010687954.1|( PREDICTED: glucan endo-1,3-beta-glucosidase 14 isoform X1 [Beta vulgaris subsp. vulgaris])	gi|75216237|sp|Q9ZQG9.2|E1314_ARATH(RecName: Full=Glucan endo-1,3-beta-glucosidase 14; AltName: Full=(1->3)-beta-glucan endohydrolase 14; Short=(1->3)-beta-glucanase 14; AltName: Full=Beta-1,3-endoglucanase 14; Short=Beta-1,3-glucanase 14; Flags: Precursor)
Phn-m0220-5p	TRINITY_DN90672_c0_g3	1.2	1	24	842	865	AAGGCACTGGGATAATGTTGTTGT	||||*|||||||||||||:|||||	TTCCTTGACCCTATTACAGCAACA								PF10250.6(O-FucT:GDP-fucose protein O-fucosyltransferase)	GO:0016021(cellular_component:integral component of membrane)	gi|902231728|gb|KNA22374.1|( hypothetical protein SOVF_034590 [Spinacia oleracea])	gi|75162430|sp|Q8W486.1|Y1491_ARATH(RecName: Full=Uncharacterized protein At1g04910)
Phn-m0281-5p	TRINITY_DN92623_c1_g1	1.2	1	22	17	38	ATTCAGTCTAAAAGAACATGGT	*|||||||||||||||||*||:	AAAGTCAGATTTTCTTGTCCCG					K04733	IRAK4		PF07714.14(Pkinase_Tyr:Protein tyrosine kinase); PF00069.22(Pkinase:Protein kinase domain); PF11883.5(DUF3403:Domain of unknown function (DUF3403))	GO:0004672(molecular_function:protein kinase activity); GO:0016020(cellular_component:membrane)	gi|731351339|ref|XP_010686985.1|( PREDICTED: uncharacterized protein LOC104901135 [Beta vulgaris subsp. vulgaris])	gi|75329759|sp|Q8L7G3.1|CRK7_ARATH(RecName: Full=Cysteine-rich receptor-like protein kinase 7; Short=Cysteine-rich RLK7; Flags: Precursor)
Phn-m0011-3p	TRINITY_DN88126_c1_g5	1.5	1	22	28	49	ACGTAAACAACATGATATATCG	|||||||||||*|:||||||||	TGCATTTGTTGGATTATATAGC					K09287	RAV				gi|902222130|gb|KNA19098.1|( hypothetical protein SOVF_064760 [Spinacia oleracea])	gi|75268209|sp|Q9C6P5.1|RAVL2_ARATH(RecName: Full=AP2/ERF and B3 domain-containing transcription factor At1g50680; AltName: Full=RAV1-like ethylene-responsive transcription factor At1g50680)
Phn-m0011-3p	TRINITY_DN88355_c0_g10	1.5	1	22	135	156	ACGTAAACAACATGATATATCG	|||||||||||*|||||||:|:	TGCATTTGTTGAACTATATGGT	COG0137(E:Amino acid transport and metabolism )		COG0137(Citrulline--aspartate ligase)		K01940	argG, ASS1	map00220(Arginine biosynthesis); map00250(Alanine, aspartate and glutamate metabolism)	PF00764.16(Arginosuc_synth:Arginosuccinate synthase)	GO:0006526(biological_process:arginine biosynthetic process); GO:0005524(molecular_function:ATP binding); GO:0004055(molecular_function:argininosuccinate synthase activity)	gi|731317329|ref|XP_010668530.1|( PREDICTED: argininosuccinate synthase, chloroplastic [Beta vulgaris subsp. vulgaris])	gi|78099761|sp|Q9SZX3.3|ASSY_ARATH(RecName: Full=Argininosuccinate synthase, chloroplastic; AltName: Full=Citrulline--aspartate ligase; Flags: Precursor)
Phn-m0011-3p	TRINITY_DN90150_c1_g2	1.5	1	22	2137	2158	ACGTAAACAACATGATATATCG	|||||||||||*|:||||||||	TGCATTTGTTGGATTATATAGC					K14545	RRP7	map03008(Ribosome biogenesis in eukaryotes)	PF12923.4(RRP7:Ribosomal RNA-processing protein 7 (RRP7))		gi|902188678|gb|KNA11211.1|( hypothetical protein SOVF_137280 isoform A [Spinacia oleracea])	gi|66773938|sp|Q9D1C9.1|RRP7A_MOUSE(RecName: Full=Ribosomal RNA-processing protein 7 homolog A; AltName: Full=Gastric cancer antigen Zg14 homolog)
Phn-m0011-3p	TRINITY_DN90759_c4_g6	1.5	1	22	2500	2521	ACGTAAACAACATGATATATCG	|||||||||||*|:||||||||	TGCATTTGTTGGATTATATAGC								PF02704.11(GASA:Gibberellin regulated protein); PF07727.11(RVT_2:Reverse transcriptase (RNA-dependent DNA polymerase))		gi|802550613|ref|XP_012093075.1|( PREDICTED: snakin-1 [Jatropha curcas])	gi|75164757|sp|Q948Z4.1|SNAK1_SOLTU(RecName: Full=Snakin-1; Flags: Precursor)
Phn-m0013-3p	TRINITY_DN83519_c1_g1	1.5	1	22	620	641	ACGTAAACAAATGACTGGAACG	||||||||||||||*||:|||:	TGCATTTGTTTACTAACTTTGT		NOG146375(S:Function unknown )		NOG146375(Protein of unknown function, DUF538)				PF04398.9(DUF538:Protein of unknown function, DUF538)		gi|870854236|gb|KMT06033.1|( hypothetical protein BVRB_7g163620 [Beta vulgaris subsp. vulgaris])	gi|75181387|sp|Q9M015.1|Y5161_ARATH(RecName: Full=Uncharacterized protein At5g01610)
Phn-m0013-3p	TRINITY_DN86542_c8_g2	1.5	1	22	91	113	ACGTAAACAAATGACTGG-AACG	|||||||||||||||::|*||||	TGCATTTGTTTACTGGTCTTTGC					K10666	RNF5	map04141(Protein processing in endoplasmic reticulum)	PF13920.3(zf-C3HC4_3:Zinc finger, C3HC4 type (RING finger)); PF00097.22(zf-C3HC4:Zinc finger, C3HC4 type (RING finger)); PF13923.3(zf-C3HC4_2:Zinc finger, C3HC4 type (RING finger)); PF13639.3(zf-RING_2:Ring finger domain); PF14634.3(zf-RING_5:zinc-RING finger domain); PF13445.3(zf-RING_UBOX:RING-type zinc-finger); PF14447.3(Prok-RING_4:Prokaryotic RING finger family 4); PF15227.3(zf-C3HC4_4:zinc …		gi|731339558|ref|XP_010680923.1|( PREDICTED: E3 ubiquitin-protein ligase RNF185-like [Beta vulgaris subsp. vulgaris])	gi|2501735|sp|Q09463.1|RNF5_CAEEL(RecName: Full=RING finger protein 5)
Phn-m0013-3p	TRINITY_DN89706_c2_g1	1.5	1	22	962	983	ACGTAAACAAATGACTGGAACG	||||||||||||||||*|*|||	TGCATTTGTTTACTGAGCCTGC									GO:0016787(molecular_function:hydrolase activity)	gi|731357744|ref|XP_010690373.1|( PREDICTED: beta-galactosidase 13-like [Beta vulgaris subsp. vulgaris])	gi|152013366|sp|Q9SCU8.2|BGA14_ARATH(RecName: Full=Beta-galactosidase 14; Short=Lactase 14; Flags: Precursor)
Phn-m0018-5p	TRINITY_DN86665_c2_g1	1.5	1	24	110	133	AATCCAGTCCAGATCCAATGGATC	|||*|||||||:||||||||||||	TTAAGTCAGGTTTAGGTTACCTAG					K14497	PP2C	map04016(MAPK signaling pathway - plant); map04075(Plant hormone signal transduction)	PF00481.18(PP2C:Protein phosphatase 2C)	GO:0004721(molecular_function:phosphoprotein phosphatase activity); GO:0043169(molecular_function:cation binding)	gi|902180287|gb|KNA09519.1|( hypothetical protein SOVF_152860 isoform B [Spinacia oleracea])	gi|75286811|sp|Q5SN75.1|P2C08_ORYSJ(RecName: Full=Probable protein phosphatase 2C 8; Short=OsPP2C08)
Phn-m0024-3p	TRINITY_DN89670_c3_g2	1.5	1	21	2456	2476	TTTTGAACAATGTATACAACT	|:|||||||||:|||||||*|	AGAACTTGTTATATATGTTCA								PF14226.3(DIOX_N:non-haem dioxygenase in morphine synthesis N-terminal); PF03171.17(2OG-FeII_Oxy:2OG-Fe(II) oxygenase superfamily)		gi|1025202298|ref|XP_016477383.1|( PREDICTED: 1-aminocyclopropane-1-carboxylate oxidase homolog 1-like [Nicotiana tabacum])	gi|75299765|sp|Q8H1S4.1|ACCH3_ARATH(RecName: Full=1-aminocyclopropane-1-carboxylate oxidase homolog 3)
Phn-m0024-3p	TRINITY_DN91758_c0_g3	1.5	1	21	145	166	TTTTGAACAATGTATACAA-CT	|||||||*|||||||||||*||	AAAACTTTTTACATATGTTAGA								PF00415.15(RCC1:Regulator of chromosome condensation (RCC1) repeat); PF13540.3(RCC1_2:Regulator of chromosome condensation (RCC1) repeat)		gi|731317298|ref|XP_010668434.1|( PREDICTED: ultraviolet-B receptor UVR8 [Beta vulgaris subsp. vulgaris])	gi|81885332|sp|Q6P798.1|RCBT2_RAT(RecName: Full=RCC1 and BTB domain-containing protein 2; AltName: Full=Chromosome condensation 1-like; AltName: Full=Regulator of chromosome condensation and BTB domain-containing protein 2)
Phn-m0026-3p	TRINITY_DN89341_c1_g1	1.5	1	24	2218	2242	AGAAGTATCTGACACGGGTGACT-C	||||||||||||||||||||**|*|	TCTTCATAGACTGTGCCCACACACG	COG2233(F:Nucleotide transport and metabolism )		COG2233(permease)		K14611	SLC23A1_2, SVCT1_2		PF00860.17(Xan_ur_permease:Permease family)	GO:0055085(biological_process:transmembrane transport); GO:0016021(cellular_component:integral component of membrane); GO:0005215(molecular_function:transporter activity)	gi|731314179|ref|XP_010684514.1|( PREDICTED: nucleobase-ascorbate transporter 3 [Beta vulgaris subsp. vulgaris])	gi|122064605|sp|Q8GZD4.2|NAT3_ARATH(RecName: Full=Nucleobase-ascorbate transporter 3; Short=AtNAT3)
Phn-m0029-3p	TRINITY_DN87081_c1_g4	1.5	1	24	2440	2463	AACGGGAATCTTGTGACCATTATT	|||||:|*||||||||||||||||	TTGCCTTAAGAACACTGGTAATAA		NOG128058(S:Function unknown )		NOG128058(BTB POZ domain-containing protein)				PF00651.28(BTB:BTB/POZ domain); PF07707.12(BACK:BTB And C-terminal Kelch)	GO:0004842(molecular_function:ubiquitin-protein transferase activity); GO:0016567(biological_process:protein ubiquitination); GO:0031463(cellular_component:Cul3-RING ubiquitin ligase complex); GO:0005634(cellular_component:nucleus); GO:0010114(biological_process:response to red light)	gi|902210049|gb|KNA16335.1|( hypothetical protein SOVF_090030 [Spinacia oleracea])	gi|327488374|sp|Q9FPW6.2|POB1_ARATH(RecName: Full=BTB/POZ domain-containing protein POB1; AltName: Full=POZ/BTB CONTAINING-PROTEIN 1; Short=AtPOB1)
Phn-m0029-3p	TRINITY_DN88979_c0_g2	1.5	1	24	1432	1455	AACGGGAATCTTGTGACCATTATT	||||:||*||||||||||||||||	TTGCTCTAAGAACACTGGTAATAA					K16280	RGLG				gi|659117881|ref|XP_008458835.1|( PREDICTED: E3 ubiquitin-protein ligase RGLG2 [Cucumis melo])	gi|75181029|sp|Q9LY87.1|RGLG2_ARATH(RecName: Full=E3 ubiquitin-protein ligase RGLG2; AltName: Full=RING domain ligase 2)
Phn-m0069-3p	TRINITY_DN87286_c4_g1	1.5	1	23	3445	3467	AAACAACCTGATGTATCGGAGGG	|||||||*|||||||||||||::	TTTGTTGAACTACATAGCCTCTT					K14400	PCF11	map03015(mRNA surveillance pathway)	PF04818.10(CTD_bind:RNA polymerase II-binding domain.)		gi|731369803|ref|XP_010665531.1|( PREDICTED: polyadenylation and cleavage factor homolog 4 [Beta vulgaris subsp. vulgaris])	gi|122229994|sp|Q0WPF2.1|PCFS4_ARATH(RecName: Full=Polyadenylation and cleavage factor homolog 4)
Phn-m0069-3p	TRINITY_DN89629_c1_g4	1.5	1	23	403	425	AAACAACCTGATGTATCGGAGGG	|||*||||||||||||||||:|:	TTTCTTGGACTACATAGCCTTCT	COG5251(K:Transcription )		COG5251(TAF11 RNA polymerase II, TATA box binding protein (TBP)-associated factor)		K03135	TAF11	map03022(Basal transcription factors)	PF04719.11(TAFII28:hTAFII28-like protein conserved region)	GO:0005488(molecular_function:binding); GO:0044271(biological_process:cellular nitrogen compound biosynthetic process); GO:0034645(biological_process:cellular macromolecule biosynthetic process); GO:0010467(biological_process:gene expression); GO:0044238(biological_process:primary metabolic process)	gi|902186608|gb|KNA10728.1|( hypothetical protein SOVF_141620 [Spinacia oleracea])	gi|75264738|sp|Q9M565.1|TAF11_ARATH(RecName: Full=Transcription initiation factor TFIID subunit 11; AltName: Full=TBP-associated factor 11; Short=AtTAF11)
Phn-m0069-3p	TRINITY_DN90149_c3_g2	1.5	1	23	20	42	AAACAACCTGATGTATCGGAGGG	|||||||||*||||||||||||*	TTTGTTGGAGTACATAGCCTCCA								PF13639.3(zf-RING_2:Ring finger domain); PF12861.4(zf-ANAPC11:Anaphase-promoting complex subunit 11 RING-H2 finger); PF12678.4(zf-rbx1:RING-H2 zinc finger domain); PF17123.2(zf-RING_11:RING-like zinc finger); PF13923.3(zf-C3HC4_2:Zinc finger, C3HC4 type (RING finger)); PF00097.22(zf-C3HC4:Zinc finger, C3HC4 type (RING finger)); PF13445.3(zf-RING_UBOX:RING-type zinc-finger)		gi|870851124|gb|KMT03190.1|( hypothetical protein BVRB_8g197390 [Beta vulgaris subsp. vulgaris])	gi|75317983|sp|O22283.1|RHC2A_ARATH(RecName: Full=Probable E3 ubiquitin-protein ligase RHC2A; AltName: Full=RING-H2 finger C2a; AltName: Full=RING-H2 zinc finger protein RHC2a)
Phn-m0069-3p	TRINITY_DN90783_c2_g3	1.5	1	23	3420	3442	AAACAACCTGATGTATCGGAGGG	||||||*|:||||||||||||||	TTTGTTTGGCTACATAGCCTCCC								PF01301.16(Glyco_hydro_35:Glycosyl hydrolases family 35); PF02140.15(Gal_Lectin:Galactose binding lectin domain); PF02449.12(Glyco_hydro_42:Beta-galactosidase); PF13364.3(BetaGal_dom4_5:Beta-galactosidase jelly roll domain)	GO:0030246(molecular_function:carbohydrate binding); GO:0004565(molecular_function:beta-galactosidase activity); GO:0005975(biological_process:carbohydrate metabolic process)	gi|731312105|ref|XP_010672619.1|( PREDICTED: beta-galactosidase 5 [Beta vulgaris subsp. vulgaris])	gi|75202767|sp|Q9SCV9.1|BGAL3_ARATH(RecName: Full=Beta-galactosidase 3; Short=Lactase 3; Flags: Precursor)
Phn-m0069-3p	TRINITY_DN92111_c0_g2	1.5	1	23	4072	4094	AAACAACCTGATGTATCGGAGGG	||||||*|:||||||||||||||	TTTGTTAGGCTACATAGCCTCCC					K05747	WAS	map04144(Endocytosis)			gi|731350576|ref|XP_010686573.1|( PREDICTED: uncharacterized protein At4g04980-like isoform X1 [Beta vulgaris subsp. vulgaris])	gi|122180140|sp|Q1PEB4.1|Y4498_ARATH(RecName: Full=Uncharacterized protein At4g04980)
Phn-m0074-5p	TRINITY_DN86243_c0_g4	1.5	1	24	294	317	AGGATCGGGATTCTACTTTGGATC	||||||||:||||||*||||||||	TCCTAGCCTTAAGATCAAACCTAG	COG1100(R:General function prediction only )		COG1100(GTP-binding Protein)		K07904	RAB11A	map04144(Endocytosis)	PF00071.19(Ras:Ras family); PF08477.10(Roc:Ras of Complex, Roc, domain of DAPkinase)	GO:0005525(molecular_function:GTP binding); GO:0005622(cellular_component:intracellular); GO:0016787(molecular_function:hydrolase activity); GO:0007264(biological_process:small GTPase mediated signal transduction)	gi|566200975|ref|XP_006376403.1|( GTP-binding family protein [Populus trichocarpa])	gi|75171043|sp|Q9FJH0.1|RAA1F_ARATH(RecName: Full=Ras-related protein RABA1f; Short=AtRABA1f)
Phn-m0077-5p	TRINITY_DN89575_c7_g1	1.5	1	24	1225	1248	ATCGACGCAATCTTCACCTTGGGT	||||||||||||||||**||||||	TAGCTGCGTTAGAAGTAAAACCCA					K07007	K07007		PF03486.11(HI0933_like:HI0933-like protein); PF07992.11(Pyr_redox_2:Pyridine nucleotide-disulphide oxidoreductase)	GO:0016491(molecular_function:oxidoreductase activity); GO:0055114(biological_process:oxidation-reduction process)	gi|731319551|ref|XP_010670332.1|( PREDICTED: uncharacterized protein LOC104887411 isoform X1 [Beta vulgaris subsp. vulgaris])	gi|281312487|sp|Q795R8.2|YTFP_BACSU(RecName: Full=Uncharacterized protein YtfP)
Phn-m0078-5p	TRINITY_DN91051_c2_g1	1.5	1	24	147	170	ATTTCCGGTCAAAGTTTTTCAACT	|||:*|||||||||||||||||||	TAAGTGCCAGTTTCAAAAAGTTGA					K08472	MLO		PF03094.12(Mlo:Mlo family)	GO:0005488(molecular_function:binding)	gi|731364118|ref|XP_010693799.1|( PREDICTED: uncharacterized protein LOC104906705 [Beta vulgaris subsp. vulgaris])	gi|6166555|sp|O49621.1|MLO1_ARATH(RecName: Full=MLO-like protein 1; Short=AtMlo1; AltName: Full=MLO protein homolog 1; Short=AtMlo-H1)
Phn-m0082-3p	TRINITY_DN87211_c2_g8	1.5	1	22	998	1019	AACGTGAACAATCTGATGTATC	|||||:|||||:||:|||||||	TTGCATTTGTTGGATTACATAG										gi|125603077|gb|EAZ42402.1|( hypothetical protein OsJ_26980 [Oryza sativa Japonica Group])	gi|75098820|sp|O49636.1|MPC4_ARATH(RecName: Full=Mitochondrial pyruvate carrier 4)
Phn-m0082-3p	TRINITY_DN87428_c0_g1	1.5	1	22	1139	1160	AACGTGAACAATCTGATGTATC	|||||:*|||||||||||||||	TTGCATCTGTTAGACTACATAG					K04354	PPP2R2	map03015(mRNA surveillance pathway)		GO:0000159(cellular_component:protein phosphatase type 2A complex); GO:0034047(biological_process:regulation of protein phosphatase type 2A activity)	gi|976921176|gb|KVI05876.1|( Protein phosphatase 2A, regulatory subunit PR55 [Cynara cardunculus var. scolymus])	gi|85680895|sp|Q38821.2|2ABA_ARATH(RecName: Full=Serine/threonine protein phosphatase 2A 55 kDa regulatory subunit B alpha isoform; Short=AtB alpha; Short=PP2A, subunit B, alpha isoform)
Phn-m0082-3p	TRINITY_DN88713_c2_g4	1.5	1	22	510	531	AACGTGAACAATCTGATGTATC	|||||:|||||:|||||||||*	TTGCATTTGTTGGACTACATAA					K17913	CCD8	map00906(Carotenoid biosynthesis)			gi|731317284|ref|XP_010668385.1|( PREDICTED: carotenoid cleavage dioxygenase 8 homolog B, chloroplastic [Beta vulgaris subsp. vulgaris])	gi|75156392|sp|Q8LIY8.1|CCD8B_ORYSJ(RecName: Full=Carotenoid cleavage dioxygenase 8 homolog B, chloroplastic; Short=OsCCD8b; AltName: Full=Protein DWARF-10; AltName: Full=Protein MAX4 homolog; Flags: Precursor)
Phn-m0082-3p	TRINITY_DN89509_c1_g2	1.5	1	22	1603	1624	AACGTGAACAATCTGATGTATC	||*||:||||||||||||||||	TTACATTTGTTAGACTACATAG	COG0515(T:Signal transduction mechanisms )		COG0515(Serine Threonine protein kinase)		K04733	IRAK4		PF07714.14(Pkinase_Tyr:Protein tyrosine kinase); PF00069.22(Pkinase:Protein kinase domain)	GO:0005886(cellular_component:plasma membrane); GO:0006468(biological_process:protein phosphorylation); GO:0005524(molecular_function:ATP binding); GO:0004674(molecular_function:protein serine/threonine kinase activity)	gi|731350514|ref|XP_010686542.1|( PREDICTED: putative serine/threonine-protein kinase [Beta vulgaris subsp. vulgaris])	gi|313471762|sp|C0LGN2.1|Y3148_ARATH(RecName: Full=Probable leucine-rich repeat receptor-like serine/threonine-protein kinase At3g14840; Flags: Precursor)
Phn-m0082-3p	TRINITY_DN90399_c4_g4	1.5	1	22	783	804	AACGTGAACAATCTGATGTATC	|||||:|||||:||:|||||||	TTGCATTTGTTGGATTACATAG									GO:0000278(biological_process:mitotic cell cycle); GO:0005774(cellular_component:vacuolar membrane); GO:0009908(biological_process:flower development); GO:0009735(biological_process:response to cytokinin); GO:0007166(biological_process:cell surface receptor signaling pathway); GO:0007202(biological_process:activation of phospholipase C activity); GO:0032960(biological_process:regulation of inosit…	gi|731362699|ref|XP_010693024.1|( PREDICTED: G-protein coupled receptor 1 [Beta vulgaris subsp. vulgaris])	gi|75219002|sp|O04714.1|GCR1_ARATH(RecName: Full=G-protein coupled receptor 1)
Phn-m0082-3p	TRINITY_DN90880_c0_g3	1.5	1	22	728	749	AACGTGAACAATCTGATGTATC	|||||:|||||:|||||||||*	TTGCATTTGTTGGACTACATAA					K10579	UBE2M, UBC12	map04120(Ubiquitin mediated proteolysis)		GO:0016021(cellular_component:integral component of membrane); GO:0005524(molecular_function:ATP binding)	gi|902229708|gb|KNA21581.1|( hypothetical protein SOVF_041850 [Spinacia oleracea])	gi|75313330|sp|Q9SDY5.1|RCE1_ARATH(RecName: Full=NEDD8-conjugating enzyme Ubc12; AltName: Full=RUB1 carrier protein 1; AltName: Full=RUB1-conjugating enzyme 1; AltName: Full=RUB1-protein ligase 1)
Phn-m0082-3p	TRINITY_DN91753_c0_g2	1.5	1	22	12	33	AACGTGAACAATCTGATGTATC	|||||:||*|||||||||||||	TTGCATTTATTAGACTACATAG								PF00892.17(EamA:EamA-like transporter family)		gi|1021548439|ref|XP_016165666.1|( PREDICTED: WAT1-related protein At5g64700-like [Arachis ipaensis])	gi|75171397|sp|Q9FL41.1|WTR38_ARATH(RecName: Full=WAT1-related protein At5g07050)
Phn-m0082-3p	TRINITY_DN92686_c0_g1	1.5	1	22	1058	1079	AACGTGAACAATCTGATGTATC	|||||:|||||:|||||||||*	TTGCATTTGTTGGACTACATAC					K03676	grxC, GLRX, GLRX2		PF00462.21(Glutaredoxin:Glutaredoxin)	GO:0005623(cellular_component:cell); GO:0045454(biological_process:cell redox homeostasis); GO:0009055(molecular_function:electron carrier activity); GO:0015035(molecular_function:protein disulfide oxidoreductase activity); GO:0055114(biological_process:oxidation-reduction process)	gi|731364629|ref|XP_010694079.1|( PREDICTED: monothiol glutaredoxin-S1-like [Beta vulgaris subsp. vulgaris])	gi|75181056|sp|Q9LYC8.1|GRXS6_ARATH(RecName: Full=Monothiol glutaredoxin-S6; Short=AtGrxS6; AltName: Full=Protein ROXY 17)
Phn-m0082-3p	TRINITY_DN92815_c0_g2	1.5	1	22	2746	2767	AACGTGAACAATCTGATGTATC	|||||:|||||:|:||||||||	TTGCATTTGTTGGGCTACATAG					K05917	CYP51	map00100(Steroid biosynthesis)	PF00067.19(p450:Cytochrome P450)	GO:0008398(molecular_function:sterol 14-demethylase activity); GO:0070988(biological_process:demethylation); GO:0005886(cellular_component:plasma membrane); GO:0005506(molecular_function:iron ion binding); GO:0020037(molecular_function:heme binding); GO:0032259(biological_process:methylation); GO:0016021(cellular_component:integral component of membrane); GO:0008168(molecular_function:methyltrans…	gi|731360761|ref|XP_010691994.1|( PREDICTED: obtusifoliol 14-alpha demethylase-like [Beta vulgaris subsp. vulgaris])	gi|75313134|sp|Q9SAA9.1|CP511_ARATH(RecName: Full=Sterol 14-demethylase; AltName: Full=Cytochrome P450 51A2; AltName: Full=Cytochrome P450 51G1; Short=AtCYP51; AltName: Full=Obtusifoliol 14-demethylase; AltName: Full=Protein EMBRYO DEFECTIVE 1738)
Phn-m0087-5p	TRINITY_DN85770_c0_g1	1.5	1	22	2173	2194	TAAGGCCATGTTCTTTTGGACT	|*|||||||||||||||::|||	AATCCGGTACAAGAAAATTTGA					K00797	speE, SRM	map00270(Cysteine and methionine metabolism); map00480(Glutathione metabolism); map00330(Arginine and proline metabolism); map00410(beta-Alanine metabolism)	PF01564.14(Spermine_synth:Spermine/spermidine synthase)	GO:0016740(molecular_function:transferase activity)	gi|661895603|emb|CDP00181.1|( unnamed protein product [Coffea canephora])	gi|6094335|sp|O82147.1|SPDE_COFAR(RecName: Full=Spermidine synthase; Short=SPDSY; AltName: Full=Putrescine aminopropyltransferase)
Phn-m0087-5p	TRINITY_DN86271_c6_g1	1.5	1	22	2906	2927	TAAGGCCATGTTCTTTTGGACT	||||:||*||||||||||||||	ATTCTGGAACAAGAAAACCTGA	COG0415(L:Replication, recombination and repair )		COG0415(deoxyribo-dipyrimidine photolyase)		K12118	CRY1	map04712(Circadian rhythm - plant)	PF03441.11(FAD_binding_7:FAD binding domain of DNA photolyase); PF12546.5(Cryptochrome_C:Blue/Ultraviolet sensing protein C terminal); PF00875.15(DNA_photolyase:DNA photolyase)	GO:0009882(molecular_function:blue light photoreceptor activity); GO:0009785(biological_process:blue light signaling pathway)	gi|731312800|ref|XP_010676474.1|( PREDICTED: cryptochrome-1 isoform X1 [Beta vulgaris subsp. vulgaris])	gi|332278156|sp|Q43125.2|CRY1_ARATH(RecName: Full=Cryptochrome-1; Short=AtCry; Short=Atcry1; AltName: Full=Blue light photoreceptor; AltName: Full=Protein BLUE LIGHT UNINHIBITED 1; AltName: Full=Protein ELONGATED HYPOCOTYL 4; AltName: Full=Protein OUT OF PHASE 2; Short=OOP2)
Phn-m0087-5p	TRINITY_DN86390_c3_g1	1.5	1	22	2079	2100	TAAGGCCATGTTCTTTTGGACT	|*||:|||||||||||||||||	AATCTGGTACAAGAAAACCTGA	COG5078(O:Posttranslational modification, protein turnover, chaperones )		COG5078(ubiquitin-conjugating enzyme)		K06689	UBE2D, UBC4, UBC5	map04120(Ubiquitin mediated proteolysis); map04141(Protein processing in endoplasmic reticulum)	PF00179.23(UQ_con:Ubiquitin-conjugating enzyme)	GO:0005524(molecular_function:ATP binding)	gi|902181353|gb|KNA09721.1|( hypothetical protein SOVF_151000 [Spinacia oleracea])	gi|12643427|sp|P35134.2|UBC11_ARATH(RecName: Full=Ubiquitin-conjugating enzyme E2 11; AltName: Full=E2 ubiquitin-conjugating enzyme 11; AltName: Full=Ubiquitin carrier protein 11; AltName: Full=Ubiquitin-conjugating enzyme E2-17 kDa 11; AltName: Full=Ubiquitin-protein ligase 11)
Phn-m0087-5p	TRINITY_DN86393_c0_g3	1.5	1	22	1605	1626	TAAGGCCATGTTCTTTTGGACT	|||||*||||||||||||*|||	ATTCCAGTACAAGAAAACGTGA					K05857	PLCD	map04070(Phosphatidylinositol signaling system); map04933(AGE-RAGE signaling pathway in diabetic complications); map00562(Inositol phosphate metabolism)	PF00387.16(PI-PLC-Y:Phosphatidylinositol-specific phospholipase C, Y domain); PF00388.16(PI-PLC-X:Phosphatidylinositol-specific phospholipase C, X domain); PF00168.27(C2:C2 domain)	GO:0006629(biological_process:lipid metabolic process); GO:0008081(molecular_function:phosphoric diester hydrolase activity); GO:0007165(biological_process:signal transduction)	gi|731348553|ref|XP_010685546.1|( PREDICTED: phosphoinositide phospholipase C 4-like [Beta vulgaris subsp. vulgaris])	gi|75306038|sp|Q944C1.2|PLCD4_ARATH(RecName: Full=Phosphoinositide phospholipase C 4; AltName: Full=Phosphoinositide phospholipase PLC4; Short=AtPLC4; Short=PI-PLC4)
Phn-m0087-5p	TRINITY_DN86730_c6_g8	1.5	1	22	430	451	TAAGGCCATGTTCTTTTGGACT	|*|:||||||||||||||||||	AATTCGGTACAAGAAAACCTGA					K03301	TC.AAA				gi|61651614|dbj|BAD91180.1|( putative plastidic adenylate transporter [Mesembryanthemum crystallinum])	gi|26454676|sp|P92935.2|TLC2_ARATH(RecName: Full=ADP,ATP carrier protein 2, chloroplastic; AltName: Full=ADP/ATP translocase 2; AltName: Full=Adenine nucleotide translocase 2; Flags: Precursor)
Phn-m0087-5p	TRINITY_DN86828_c0_g1	1.5	1	22	2645	2666	TAAGGCCATGTTCTTTTGGACT	||||:||*||||||||||||||	ATTCTGGGACAAGAAAACCTGA		NOG38337(R:General function prediction only ); NOG29770(R:General function prediction only )		NOG38337(actin cytoskeleton protein); NOG29770(RRM)					GO:0003676(molecular_function:nucleic acid binding); GO:0000166(molecular_function:nucleotide binding)	gi|731332706|ref|XP_010677353.1|( PREDICTED: uncharacterized protein LOC104893014 [Beta vulgaris subsp. vulgaris])	gi|75334933|sp|Q9LFD5.1|BPA1_ARATH(RecName: Full=Binding partner of ACD11 1)
Phn-m0087-5p	TRINITY_DN87714_c3_g1	1.5	1	22	2125	2146	TAAGGCCATGTTCTTTTGGACT	||||:||*||||||||||||||	ATTCTGGAACAAGAAAACCTGA								PF00010.23(HLH:Helix-loop-helix DNA-binding domain)		gi|902234234|gb|KNA23377.1|( hypothetical protein SOVF_024910 [Spinacia oleracea])	gi|75277341|sp|O22768.2|UNE12_ARATH(RecName: Full=Transcription factor UNE12; AltName: Full=Basic helix-loop-helix protein 59; Short=AtbHLH59; Short=bHLH 59; AltName: Full=Protein UNFERTILIZED EMBRYO SAC 12; AltName: Full=Transcription factor EN 93; AltName: Full=bHLH transcription factor bHLH059)
Phn-m0087-5p	TRINITY_DN88283_c2_g1	1.5	1	22	229	250	TAAGGCCATGTTCTTTTGGACT	|||||||*|:||||||||||||	ATTCCGGGATAAGAAAACCTGA		NOG123017(K:Transcription )		NOG123017(Myb-like DNA-binding domain)				PF14379.3(Myb_CC_LHEQLE:MYB-CC type transfactor, LHEQLE motif)		gi|731324940|ref|XP_010673243.1|( PREDICTED: protein PHR1-LIKE 1-like isoform X2 [Beta vulgaris subsp. vulgaris])	gi|75337328|sp|Q9SJW0.1|PHL7_ARATH(RecName: Full=Myb family transcription factor PHL7; AltName: Full=Protein PHR1-LIKE 7)
Phn-m0087-5p	TRINITY_DN88435_c1_g1	1.5	1	22	580	601	TAAGGCCATGTTCTTTTGGACT	|||:|||*||||||||||||||	ATTTCGGGACAAGAAAACCTGA					K03549	kup			GO:0015079(molecular_function:potassium ion transmembrane transporter activity); GO:0071805(biological_process:potassium ion transmembrane transport); GO:0016021(cellular_component:integral component of membrane)	gi|398025465|gb|AFO70204.1|( putative potassium transporter KUP3, partial [Alternanthera philoxeroides])	gi|75164097|sp|Q942X8.1|HAK2_ORYSJ(RecName: Full=Probable potassium transporter 2; AltName: Full=OsHAK2)
Phn-m0087-5p	TRINITY_DN88672_c4_g1	1.5	1	22	2843	2864	TAAGGCCATGTTCTTTTGGACT	||||:||*||||||||||||||	ATTCTGGGACAAGAAAACCTGA								PF03647.10(Tmemb_14:Transmembrane proteins 14C)		gi|731324350|ref|XP_010672925.1|( PREDICTED: uncharacterized protein LOC104889408 [Beta vulgaris subsp. vulgaris])	gi|75163112|sp|Q93V66.1|FAX1_ARATH(RecName: Full=Protein FATTY ACID EXPORT 1, chloroplastic; Short=At-FAX1; Flags: Precursor)
Phn-m0087-5p	TRINITY_DN89061_c5_g1	1.5	1	22	84	105	TAAGGCCATGTTCTTTTGGACT	|||||||*:|||||||||||||	ATTCCGGGGCAAGAAAACCTGA											gi|49035761|sp|O64692.1|G2OX3_ARATH(RecName: Full=Gibberellin 2-beta-dioxygenase 3; AltName: Full=GA 2-oxidase 3; AltName: Full=Gibberellin 2-beta-hydroxylase 3; AltName: Full=Gibberellin 2-oxidase 3)
Phn-m0087-5p	TRINITY_DN89932_c1_g1	1.5	1	22	452	473	TAAGGCCATGTTCTTTTGGACT	|*||||||||||||||||:||:	AATCCGGTACAAGAAAACTTGG								PF02537.12(CRCB:CrcB-like protein, Camphor Resistance (CrcB))		gi|702383084|ref|XP_010063995.1|( PREDICTED: LOW QUALITY PROTEIN: UPF0695 membrane protein C977.11/PB8B6.06c-like [Eucalyptus grandis])	gi|116243196|sp|Q24VQ6.1|CRCB1_DESHY(RecName: Full=Putative fluoride ion transporter CrcB 1)
Phn-m0087-5p	TRINITY_DN91220_c6_g1	1.5	1	22	7	28	TAAGGCCATGTTCTTTTGGACT	||||:||*||||||||||||||	ATTCTGGGACAAGAAAACCTGA		NOG23491(S:Function unknown )		NOG23491(Protein of unknown function (DUF2930))				PF11152.5(DUF2930:Protein of unknown function (DUF2930))	GO:0016021(cellular_component:integral component of membrane); GO:0010190(biological_process:cytochrome b6f complex assembly); GO:0009507(cellular_component:chloroplast)	gi|731344319|ref|XP_010683348.1|( PREDICTED: uncharacterized protein LOC104898041 [Beta vulgaris subsp. vulgaris])	gi|75127186|sp|Q6NQK9.1|CCB4_ARATH(RecName: Full=Protein COFACTOR ASSEMBLY OF COMPLEX C SUBUNIT B CCB4, chloroplastic; Flags: Precursor)
Phn-m0087-5p	TRINITY_DN91587_c2_g1	1.5	1	22	1760	1781	TAAGGCCATGTTCTTTTGGACT	|||||||*:|||||||||||||	ATTCCGGGGCAAGAAAACCTGA		NOG60034(S:Function unknown )		NOG60034(MpV17 mitochondrial inner membrane protein)	K13348	MPV17	map04146(Peroxisome)	PF04117.9(Mpv17_PMP22:Mpv17 / PMP22 family)	GO:0016021(cellular_component:integral component of membrane)	gi|731317136|ref|XP_010667863.1|( PREDICTED: protein sym-1 [Beta vulgaris subsp. vulgaris])	gi|97197141|sp|Q4IPX8.1|SYM1_GIBZE(RecName: Full=Protein SYM1)
Phn-m0087-5p	TRINITY_DN91606_c0_g1	1.5	1	22	781	802	TAAGGCCATGTTCTTTTGGACT	|||||||*|||||||||*||||	ATTCCGGAACAAGAAAAACTGA					K01580	E4.1.1.15, gadB, gadA, GAD	map00650(Butanoate metabolism); map00250(Alanine, aspartate and glutamate metabolism); map00410(beta-Alanine metabolism); map00430(Taurine and hypotaurine metabolism)		GO:0030170(molecular_function:pyridoxal phosphate binding); GO:0006536(biological_process:glutamate metabolic process); GO:0004351(molecular_function:glutamate decarboxylase activity)	gi|902212477|gb|KNA16994.1|( hypothetical protein SOVF_084120 [Spinacia oleracea])	gi|2494175|sp|Q42472.1|DCE2_ARATH(RecName: Full=Glutamate decarboxylase 2; Short=GAD 2)
Phn-m0087-5p	TRINITY_DN93201_c2_g1	1.5	1	22	431	451	TAAGGCCATGTTCTTTTGGACT	||||:|||||||||||*|||||	ATTCTGGTACAAGAAA-CCTGA					K13418	SERK1		PF08263.9(LRRNT_2:Leucine rich repeat N-terminal domain)	GO:0016310(biological_process:phosphorylation); GO:0004672(molecular_function:protein kinase activity); GO:0016020(cellular_component:membrane); GO:0000166(molecular_function:nucleotide binding)	gi|960479462|ref|XP_003571417.2|( PREDICTED: somatic embryogenesis receptor kinase 2 [Brachypodium distachyon])	gi|75338634|sp|Q9XIC7.1|SERK2_ARATH(RecName: Full=Somatic embryogenesis receptor kinase 2; Short=AtSERK2; AltName: Full=Somatic embryogenesis receptor-like kinase 2; Flags: Precursor)
Phn-m0090-3p	TRINITY_DN89220_c1_g4	1.5	1	24	2624	2647	AAGAGAATTACAGTCCAAAAGAAC	*|||:|||||||:|||||||||||	GTCTTTTAATGTTAGGTTTTCTTG		NOG16738(S:Function unknown )		NOG16738(Pentatricopeptide repeat-containing protein)				PF01535.17(PPR:PPR repeat); PF13041.3(PPR_2:PPR repeat family); PF13812.3(PPR_3:Pentatricopeptide repeat domain); PF17177.1(PPR_long:Pentacotripeptide-repeat region of PROPR); PF12854.4(PPR_1:PPR repeat); PF14559.3(TPR_19:Tetratricopeptide repeat); PF13800.3(Sigma_reg_N:Sigma factor regulator N-terminal)		gi|902146309|gb|KNA05051.1|( hypothetical protein SOVF_193980 [Spinacia oleracea])	gi|75165070|sp|Q94B59.1|PP372_ARATH(RecName: Full=Pentatricopeptide repeat-containing protein At5g09450, mitochondrial; Flags: Precursor)
Phn-m0090-3p	TRINITY_DN89632_c0_g1	1.5	1	24	501	524	AAGAGAATTACAGTCCAAAAGAAC	||||:|||||*|||||||||||||	TTCTTTTAATCTCAGGTTTTCTTG					K01728	pel	map00040(Pentose and glucuronate interconversions)	PF00544.16(Pec_lyase_C:Pectate lyase)	GO:0046872(molecular_function:metal ion binding); GO:0030570(molecular_function:pectate lyase activity); GO:0045490(biological_process:pectin catabolic process)	gi|731335138|ref|XP_010678579.1|( PREDICTED: pectate lyase-like [Beta vulgaris subsp. vulgaris])	gi|125889|sp|P15722.1|PLY59_SOLLC(RecName: Full=Probable pectate lyase P59; Flags: Precursor)
Phn-m0097-3p	TRINITY_DN86633_c1_g1	1.5	1	22	2355	2376	TGAGACAAAAACGATAAACTGA	|||:||||||||:|||||*|||	ACTTTGTTTTTGTTATTTCACT								PF01485.18(IBR:IBR domain, a half RING-finger domain); PF00097.22(zf-C3HC4:Zinc finger, C3HC4 type (RING finger)); PF13639.3(zf-RING_2:Ring finger domain); PF13923.3(zf-C3HC4_2:Zinc finger, C3HC4 type (RING finger))	GO:0005488(molecular_function:binding)	gi|802551590|ref|XP_012064880.1|( PREDICTED: probable E3 ubiquitin-protein ligase rbrA isoform X2 [Jatropha curcas])	gi|74698267|sp|Q9P3U4.1|HEL1_SCHPO(RecName: Full=E3 ubiquitin-protein ligase dbl4; AltName: Full=DNA-break-localizing protein 4; AltName: Full=Histone E3 ligase 1)
Phn-m0097-3p	TRINITY_DN87323_c0_g2	1.5	1	22	3097	3119	TGAGACAAAAACGATAAACT-GA	|||:||||||||||||||*|*||	ACTTTGTTTTTGCTATTTCACCT		NOG09712(R:General function prediction only )		NOG09712(exostosin 1)				PF03016.12(Exostosin:Exostosin family)	GO:0016021(cellular_component:integral component of membrane); GO:0016757(molecular_function:transferase activity, transferring glycosyl groups)	gi|902217476|gb|KNA17738.1|( hypothetical protein SOVF_077530 [Spinacia oleracea])	gi|1018737198|sp|F4K6F1.1|GT18_ARATH(RecName: Full=Xyloglucan galactosyltransferase XLT2; AltName: Full=Glycosyltransferase 18; Short=AtGT18; AltName: Full=Protein XYLOGLUCAN L-SIDE CHAIN GALACTOSYLTRANSFERASE POSITION 2)
Phn-m0097-3p	TRINITY_DN89130_c0_g3	1.5	1	22	324	344	TGAGACAAAAACGATAAACTGA	*|||||||||||:|||||*|||	CCTCTGTTTTTGTTATTT-ACT								PF05637.9(Glyco_transf_34:galactosyl transferase GMA12/MNN10 family)		gi|731337198|ref|XP_010679659.1|( PREDICTED: putative glycosyltransferase 7 [Beta vulgaris subsp. vulgaris])	gi|46576348|sp|Q9SZG1.1|GT6_ARATH(RecName: Full=Glycosyltransferase 6; Short=AtGT6)
Phn-m0101-5p	TRINITY_DN86211_c1_g2	1.5	1	23	1467	1489	TGAAACCGTTGTATGCATACAAG	|||*||||||||||||||||||*	ACTGTGGCAACATACGTATGTTA									GO:0006355(biological_process:regulation of transcription, DNA-templated); GO:0043565(molecular_function:sequence-specific DNA binding); GO:0003700(molecular_function:transcription factor activity, sequence-specific DNA binding); GO:0008270(molecular_function:zinc ion binding)	gi|727529853|ref|XP_010439984.1|( PREDICTED: GATA transcription factor 26-like isoform X2 [Camelina sativa])	gi|71660856|sp|Q5PP38.1|GAT27_ARATH(RecName: Full=GATA transcription factor 27)
Phn-m0101-5p	TRINITY_DN87615_c6_g4	1.5	1	23	264	287	TGAAACCGTTGTATGCATACAA-G	|||*||||||||||||||||||*|	ACTCTGGCAACATACGTATGTTGC									GO:0008757(molecular_function:S-adenosylmethionine-dependent methyltransferase activity); GO:0005768(cellular_component:endosome); GO:0005774(cellular_component:vacuolar membrane); GO:0032259(biological_process:methylation); GO:0016021(cellular_component:integral component of membrane); GO:0005802(cellular_component:trans-Golgi network)	gi|965663352|dbj|BAT79061.1|( hypothetical protein VIGAN_02186500 [Vigna angularis var. angularis])	gi|75166193|sp|Q94II3.1|PMTL_ARATH(RecName: Full=Probable methyltransferase PMT21; AltName: Full=Protein EARLY-RESPONSIVE TO DEHYDRATION 3)
Phn-m0101-5p	TRINITY_DN88172_c2_g2	1.5	1	23	1666	1689	TGAAACCGTTGTATGCATACAA-G	|||*||||||||||||||||||*|	ACTCTGGCAACATACGTATGTTGC								PF00892.17(EamA:EamA-like transporter family)	GO:0006810(biological_process:transport); GO:0005886(cellular_component:plasma membrane); GO:0022857(molecular_function:transmembrane transporter activity)	gi|1021044690|gb|KZN02471.1|( hypothetical protein DCAR_011225 [Daucus carota subsp. sativus])	gi|460425441|sp|F4KHA8.1|WTR41_ARATH(RecName: Full=WAT1-related protein At5g40230)
Phn-m0106-5p	TRINITY_DN92321_c1_g6	1.5	1	22	1312	1334	GGGAATATTGTTTTAATGG-ATG	|:|||||||:|||||||||*|||	CTCTTATAATAAAATTACCATAC					K04733	IRAK4		PF07714.14(Pkinase_Tyr:Protein tyrosine kinase); PF00069.22(Pkinase:Protein kinase domain)	GO:0006468(biological_process:protein phosphorylation); GO:0005524(molecular_function:ATP binding); GO:0004674(molecular_function:protein serine/threonine kinase activity)	gi|731361754|ref|XP_010692535.1|( PREDICTED: probable serine/threonine-protein kinase Cx32, chloroplastic [Beta vulgaris subsp. vulgaris])	gi|49066036|sp|P27450.2|CX32_ARATH(RecName: Full=Probable serine/threonine-protein kinase Cx32, chloroplastic; Flags: Precursor)
Phn-m0106-5p	TRINITY_DN92898_c4_g3	1.5	1	22	527	548	GGGAATATTGTTTTAATGGATG	||:||||||:||||||||*|||	CCTTTATAATAAAATTACGTAC								PF00083.21(Sugar_tr:Sugar (and other) transporter)	GO:0016021(cellular_component:integral component of membrane); GO:0022891(molecular_function:substrate-specific transmembrane transporter activity); GO:0032440(molecular_function:2-alkenal reductase [NAD(P)] activity); GO:0055114(biological_process:oxidation-reduction process); GO:0055085(biological_process:transmembrane transport); GO:0008643(biological_process:carbohydrate transport)	gi|731375989|ref|XP_010667424.1|( PREDICTED: sugar transport protein 13 [Beta vulgaris subsp. vulgaris])	gi|85701281|sp|Q94AZ2.2|STP13_ARATH(RecName: Full=Sugar transport protein 13; AltName: Full=Hexose transporter 13; AltName: Full=Multicopy suppressor of snf4 deficiency protein 1)
Phn-m0107-3p	TRINITY_DN89629_c1_g4	1.5	1	24	412	435	AATTAAACGTAAACAATCTGATGT	|||||||||||||*||:|||||||	TTAATTTGCATTTCTTGGACTACA	COG5251(K:Transcription )		COG5251(TAF11 RNA polymerase II, TATA box binding protein (TBP)-associated factor)		K03135	TAF11	map03022(Basal transcription factors)	PF04719.11(TAFII28:hTAFII28-like protein conserved region)	GO:0005488(molecular_function:binding); GO:0044271(biological_process:cellular nitrogen compound biosynthetic process); GO:0034645(biological_process:cellular macromolecule biosynthetic process); GO:0010467(biological_process:gene expression); GO:0044238(biological_process:primary metabolic process)	gi|902186608|gb|KNA10728.1|( hypothetical protein SOVF_141620 [Spinacia oleracea])	gi|75264738|sp|Q9M565.1|TAF11_ARATH(RecName: Full=Transcription initiation factor TFIID subunit 11; AltName: Full=TBP-associated factor 11; Short=AtTAF11)
Phn-m0107-3p	TRINITY_DN90101_c3_g2	1.5	1	24	1352	1375	AATTAAACGTAAACAATCTGATGT	|||:|||||||||||||*|||||*	TTAGTTTGCATTTGTTAAACTACT								PF00657.19(Lipase_GDSL:GDSL-like Lipase/Acylhydrolase)		gi|1035928984|gb|OAY58571.1|( hypothetical protein MANES_02G189200 [Manihot esculenta])	gi|75169352|sp|Q9C7N4.1|GDL15_ARATH(RecName: Full=GDSL esterase/lipase At1g29670; AltName: Full=Extracellular lipase At1g29670; Flags: Precursor)
Phn-m0107-3p	TRINITY_DN91753_c0_g2	1.5	1	24	15	38	AATTAAACGTAAACAATCTGATGT	|||:|||||||||*||||||||||	TTAGTTTGCATTTATTAGACTACA								PF00892.17(EamA:EamA-like transporter family)		gi|1021548439|ref|XP_016165666.1|( PREDICTED: WAT1-related protein At5g64700-like [Arachis ipaensis])	gi|75171397|sp|Q9FL41.1|WTR38_ARATH(RecName: Full=WAT1-related protein At5g07050)
Phn-m0107-3p	TRINITY_DN91841_c4_g1	1.5	1	24	174	197	AATTAAACGTAAACAATCTGATGT	|||:|||||||||||||||*||*|	TTAGTTTGCATTTGTTAGAGTAGA								PF00248.18(Aldo_ket_red:Aldo/keto reductase family)	GO:0016491(molecular_function:oxidoreductase activity); GO:0055114(biological_process:oxidation-reduction process)	gi|902236143|gb|KNA24239.1|( hypothetical protein SOVF_017810 [Spinacia oleracea])	gi|75266185|sp|Q9SQ64.1|COR2_PAPSO(RecName: Full=Non-functional NADPH-dependent codeinone reductase 2)
Phn-m0108-3p	TRINITY_DN89629_c1_g4	1.5	1	24	412	435	AATTAAACGTAAACAATCTGATGT	|||||||||||||*||:|||||||	TTAATTTGCATTTCTTGGACTACA	COG5251(K:Transcription )		COG5251(TAF11 RNA polymerase II, TATA box binding protein (TBP)-associated factor)		K03135	TAF11	map03022(Basal transcription factors)	PF04719.11(TAFII28:hTAFII28-like protein conserved region)	GO:0005488(molecular_function:binding); GO:0044271(biological_process:cellular nitrogen compound biosynthetic process); GO:0034645(biological_process:cellular macromolecule biosynthetic process); GO:0010467(biological_process:gene expression); GO:0044238(biological_process:primary metabolic process)	gi|902186608|gb|KNA10728.1|( hypothetical protein SOVF_141620 [Spinacia oleracea])	gi|75264738|sp|Q9M565.1|TAF11_ARATH(RecName: Full=Transcription initiation factor TFIID subunit 11; AltName: Full=TBP-associated factor 11; Short=AtTAF11)
Phn-m0108-3p	TRINITY_DN90101_c3_g2	1.5	1	24	1352	1375	AATTAAACGTAAACAATCTGATGT	|||:|||||||||||||*|||||*	TTAGTTTGCATTTGTTAAACTACT								PF00657.19(Lipase_GDSL:GDSL-like Lipase/Acylhydrolase)		gi|1035928984|gb|OAY58571.1|( hypothetical protein MANES_02G189200 [Manihot esculenta])	gi|75169352|sp|Q9C7N4.1|GDL15_ARATH(RecName: Full=GDSL esterase/lipase At1g29670; AltName: Full=Extracellular lipase At1g29670; Flags: Precursor)
Phn-m0108-3p	TRINITY_DN91753_c0_g2	1.5	1	24	15	38	AATTAAACGTAAACAATCTGATGT	|||:|||||||||*||||||||||	TTAGTTTGCATTTATTAGACTACA								PF00892.17(EamA:EamA-like transporter family)		gi|1021548439|ref|XP_016165666.1|( PREDICTED: WAT1-related protein At5g64700-like [Arachis ipaensis])	gi|75171397|sp|Q9FL41.1|WTR38_ARATH(RecName: Full=WAT1-related protein At5g07050)
Phn-m0108-3p	TRINITY_DN91841_c4_g1	1.5	1	24	174	197	AATTAAACGTAAACAATCTGATGT	|||:|||||||||||||||*||*|	TTAGTTTGCATTTGTTAGAGTAGA								PF00248.18(Aldo_ket_red:Aldo/keto reductase family)	GO:0016491(molecular_function:oxidoreductase activity); GO:0055114(biological_process:oxidation-reduction process)	gi|902236143|gb|KNA24239.1|( hypothetical protein SOVF_017810 [Spinacia oleracea])	gi|75266185|sp|Q9SQ64.1|COR2_PAPSO(RecName: Full=Non-functional NADPH-dependent codeinone reductase 2)
Phn-m0129-5p	TRINITY_DN87241_c6_g1	1.5	1	23	2823	2845	AGCTTTCATGTAATGTTTCTGAG	||||||*|||||||||||||||*	TCGAAAATACATTACAAAGACTA	COG3145(L:Replication, recombination and repair )		COG3145(Alkylated DNA repair protein)		K10767	ALKBH5		PF02458.12(Transferase:Transferase family); PF13532.3(2OG-FeII_Oxy_2:2OG-Fe(II) oxygenase superfamily)	GO:0016491(molecular_function:oxidoreductase activity); GO:0055114(biological_process:oxidation-reduction process)	gi|902224177|gb|KNA19697.1|( hypothetical protein SOVF_058830 isoform A [Spinacia oleracea])	gi|75136987|sp|Q70PR7.2|VINSY_RAUSE(RecName: Full=Vinorine synthase)
Phn-m0129-5p	TRINITY_DN90070_c3_g4	1.5	1	23	847	869	AGCTTTCATGTAATGTTTCTGAG	||||||*||||||||||||*|||	TCGAAATTACATTACAAAGCCTC					K01110	PTEN	map04070(Phosphatidylinositol signaling system); map00562(Inositol phosphate metabolism)		GO:0004725(molecular_function:protein tyrosine phosphatase activity); GO:0035335(biological_process:peptidyl-tyrosine dephosphorylation)	gi|731336960|ref|XP_010679536.1|( PREDICTED: uncharacterized protein LOC104894880 [Beta vulgaris subsp. vulgaris])	gi|75311550|sp|Q9LT75.1|PTN2A_ARATH(RecName: Full=Phosphatidylinositol 3,4,5-trisphosphate 3-phosphatase and protein-tyrosine-phosphatase PTEN2A; AltName: Full=Protein PHOSPHATASE AND TENSIN HOMOLOG 2-a; Short=AtPTEN2; Short=AtPTEN2a)
Phn-m0130-3p	TRINITY_DN89750_c1_g1	1.5	1	24	244	267	AAAATACTCAGAAACATTACATGA	||||||||||||||*|||*|||||	TTTTATGAGTCTTTATAACGTACT										gi|743885995|ref|XP_011037716.1|( PREDICTED: probable xyloglucan endotransglucosylase/hydrolase protein 8 [Populus euphratica])	gi|334302869|sp|Q8L9A9.2|XTH8_ARATH(RecName: Full=Probable xyloglucan endotransglucosylase/hydrolase protein 8; Short=At-XTH8; Short=XTH-8; Flags: Precursor)
Phn-m0130-3p	TRINITY_DN91922_c5_g1	1.5	1	24	3070	3093	AAAATACTCAGAAACATTACATGA	|||||*||||||||||||||||*|	TTTTACGAGTCTTTGTAATGTAAT								PF00646.30(F-box:F-box domain); PF12937.4(F-box-like:F-box-like)		gi|902185296|gb|KNA10475.1|( hypothetical protein SOVF_144150 [Spinacia oleracea])	gi|75151183|sp|Q8GXC7.1|FBK50_ARATH(RecName: Full=F-box/kelch-repeat protein At3g06240)
Phn-m0131-5p	TRINITY_DN87502_c0_g2	1.5	1	24	1460	1482	ATCAAAGAAAACAATATTATTTAT	*||||||||||||||||||*||*|	GAGTTTCTTTTGTTATAAT-AACA	COG0531(E:Amino acid transport and metabolism )		COG0531(amino acid)					PF13520.3(AA_permease_2:Amino acid permease); PF00324.18(AA_permease:Amino acid permease)	GO:1902475(biological_process:L-alpha-amino acid transmembrane transport); GO:0005887(cellular_component:integral component of plasma membrane); GO:0015179(molecular_function:L-amino acid transmembrane transporter activity); GO:0015297(molecular_function:antiporter activity)	gi|629096489|gb|KCW62484.1|( hypothetical protein EUGRSUZ_H05121 [Eucalyptus grandis])	gi|403399734|sp|B9EXZ6.1|BAT1_ORYSJ(RecName: Full=Amino-acid permease BAT1 homolog)
Phn-m0131-5p	TRINITY_DN92149_c0_g8	1.5	1	24	714	736	ATCAAAGAAAACAATATTATTTAT	||||||||||||||:||*||||*|	TAGTTTCTTTTGTTGTATTAAA-A	COG1208(M:Cell wall/membrane/envelope biogenesis )		COG1208(nucleotidyl transferase)		K03240	EIF2B5	map03013(RNA transport)	PF02020.15(W2:eIF4-gamma/eIF5/eIF2-epsilon); PF00483.20(NTP_transferase:Nucleotidyl transferase); PF00132.21(Hexapep:Bacterial transferase hexapeptide (six repeats)); PF12804.4(NTP_transf_3:MobA-like NTP transferase domain)	GO:0009058(biological_process:biosynthetic process); GO:0016779(molecular_function:nucleotidyltransferase activity)	gi|731326285|ref|XP_010673942.1|( PREDICTED: translation initiation factor eIF-2B subunit epsilon [Beta vulgaris subsp. vulgaris])	gi|3023676|sp|P56287.1|EI2BE_SCHPO(RecName: Full=Probable translation initiation factor eIF-2B subunit epsilon; AltName: Full=eIF-2B GDP-GTP exchange factor subunit epsilon)
Phn-m0132-3p	TRINITY_DN86357_c7_g3	1.5	1	22	678	699	AAACGTAAACAACATGATGTAT	|||||||||||||*||||||*|	TTTGCATTTGTTGGACTACAGA		NOG22170(R:General function prediction only )		NOG22170(RING)				PF13920.3(zf-C3HC4_3:Zinc finger, C3HC4 type (RING finger)); PF13923.3(zf-C3HC4_2:Zinc finger, C3HC4 type (RING finger)); PF13424.3(TPR_12:Tetratricopeptide repeat); PF13639.3(zf-RING_2:Ring finger domain)	GO:0005634(cellular_component:nucleus); GO:0008270(molecular_function:zinc ion binding); GO:0005829(cellular_component:cytosol); GO:1902553(biological_process:positive regulation of catalase activity)	gi|731356722|ref|XP_010689828.1|( PREDICTED: uncharacterized protein LOC104903488 [Beta vulgaris subsp. vulgaris])	gi|82194968|sp|Q5FWP4.1|CHFR_XENLA(RecName: Full=E3 ubiquitin-protein ligase CHFR; AltName: Full=Checkpoint with forkhead and RING finger domains protein)
Phn-m0132-3p	TRINITY_DN86425_c4_g1	1.5	1	22	1110	1131	AAACGTAAACAACATGATGTAT	|||||||||*||||:|||||||	TTTGCATTTCTTGTGCTACATA											gi|67460954|sp|Q8H0M1.1|QORH_SPIOL(RecName: Full=Quinone-oxidoreductase homolog, chloroplastic; AltName: Full=ceQORH)
Phn-m0132-3p	TRINITY_DN87211_c2_g8	1.5	1	22	999	1020	AAACGTAAACAACATGATGTAT	|||||||||||||*|:||||||	TTTGCATTTGTTGGATTACATA										gi|125603077|gb|EAZ42402.1|( hypothetical protein OsJ_26980 [Oryza sativa Japonica Group])	gi|75098820|sp|O49636.1|MPC4_ARATH(RecName: Full=Mitochondrial pyruvate carrier 4)
Phn-m0132-3p	TRINITY_DN87286_c4_g1	1.5	1	22	3452	3473	AAACGTAAACAACATGATGTAT	||||:||||||||*||||||||	TTTGTATTTGTTGAACTACATA					K14400	PCF11	map03015(mRNA surveillance pathway)	PF04818.10(CTD_bind:RNA polymerase II-binding domain.)		gi|731369803|ref|XP_010665531.1|( PREDICTED: polyadenylation and cleavage factor homolog 4 [Beta vulgaris subsp. vulgaris])	gi|122229994|sp|Q0WPF2.1|PCFS4_ARATH(RecName: Full=Polyadenylation and cleavage factor homolog 4)
Phn-m0132-3p	TRINITY_DN88355_c0_g10	1.5	1	22	137	158	AAACGTAAACAACATGATGTAT	|||||||||||||*||||:||:	TTTGCATTTGTTGAACTATATG	COG0137(E:Amino acid transport and metabolism )		COG0137(Citrulline--aspartate ligase)		K01940	argG, ASS1	map00220(Arginine biosynthesis); map00250(Alanine, aspartate and glutamate metabolism)	PF00764.16(Arginosuc_synth:Arginosuccinate synthase)	GO:0006526(biological_process:arginine biosynthetic process); GO:0005524(molecular_function:ATP binding); GO:0004055(molecular_function:argininosuccinate synthase activity)	gi|731317329|ref|XP_010668530.1|( PREDICTED: argininosuccinate synthase, chloroplastic [Beta vulgaris subsp. vulgaris])	gi|78099761|sp|Q9SZX3.3|ASSY_ARATH(RecName: Full=Argininosuccinate synthase, chloroplastic; AltName: Full=Citrulline--aspartate ligase; Flags: Precursor)
Phn-m0132-3p	TRINITY_DN88934_c5_g3	1.5	1	22	747	768	AAACGTAAACAACATGATGTAT	|||||||||||||*||||*|||	TTTGCATTTGTTGAACTAGATA								PF00955.18(HCO3_cotransp:HCO3- transporter family)	GO:0016021(cellular_component:integral component of membrane); GO:0005452(molecular_function:inorganic anion exchanger activity); GO:0015698(biological_process:inorganic anion transport)	gi|902205421|gb|KNA15161.1|( hypothetical protein SOVF_100750 [Spinacia oleracea])	gi|75207517|sp|Q9SSG5.1|BOR5_ARATH(RecName: Full=Putative boron transporter 5)
Phn-m0132-3p	TRINITY_DN89572_c0_g2	1.5	1	22	1093	1114	AAACGTAAACAACATGATGTAT	|||||||||*|||||:||||||	TTTGCATTTCTTGTATTACATA										gi|902235694|gb|KNA24041.1|( hypothetical protein SOVF_019380 [Spinacia oleracea])	gi|334302851|sp|Q9C9H7.2|RLP12_ARATH(RecName: Full=Receptor-like protein 12; Short=AtRLP12; Flags: Precursor)
Phn-m0132-3p	TRINITY_DN89633_c0_g2	1.5	1	22	908	929	AAACGTAAACAACATGATGTAT	|||||||||*||||||||:||:	TTTGCATTTCTTGTACTATATG								PF08879.7(WRC:WRC); PF08880.8(QLQ:QLQ)	GO:0006355(biological_process:regulation of transcription, DNA-templated); GO:0005524(molecular_function:ATP binding); GO:0032502(biological_process:developmental process); GO:0005634(cellular_component:nucleus)	gi|731372159|ref|XP_010666262.1|( PREDICTED: growth-regulating factor 1 [Beta vulgaris subsp. vulgaris])	gi|75154316|sp|Q8L8A6.1|GRF5_ARATH(RecName: Full=Growth-regulating factor 5; Short=AtGRF5; AltName: Full=Transcription activator GRF5)
Phn-m0132-3p	TRINITY_DN90399_c4_g4	1.5	1	22	784	805	AAACGTAAACAACATGATGTAT	|||||||||||||*|:||||||	TTTGCATTTGTTGGATTACATA									GO:0000278(biological_process:mitotic cell cycle); GO:0005774(cellular_component:vacuolar membrane); GO:0009908(biological_process:flower development); GO:0009735(biological_process:response to cytokinin); GO:0007166(biological_process:cell surface receptor signaling pathway); GO:0007202(biological_process:activation of phospholipase C activity); GO:0032960(biological_process:regulation of inosit…	gi|731362699|ref|XP_010693024.1|( PREDICTED: G-protein coupled receptor 1 [Beta vulgaris subsp. vulgaris])	gi|75219002|sp|O04714.1|GCR1_ARATH(RecName: Full=G-protein coupled receptor 1)
Phn-m0132-3p	TRINITY_DN91987_c1_g3	1.5	1	22	4115	4136	AAACGTAAACAACATGATGTAT	|||||||||*|||||:||||||	TTTGCATTTATTGTATTACATA		NOG26282(R:General function prediction only )		NOG26282(kelch domain containing 8A)				PF01344.22(Kelch_1:Kelch motif); PF13964.3(Kelch_6:Kelch motif); PF13418.3(Kelch_4:Galactose oxidase, central domain); PF07646.12(Kelch_2:Kelch motif); PF13415.3(Kelch_3:Galactose oxidase, central domain); PF13854.3(Kelch_5:Kelch motif); PF00646.30(F-box:F-box domain)	GO:0016567(biological_process:protein ubiquitination); GO:0031463(cellular_component:Cul3-RING ubiquitin ligase complex); GO:0004842(molecular_function:ubiquitin-protein transferase activity)	gi|731343242|ref|XP_010682796.1|( PREDICTED: F-box/kelch-repeat protein At1g67480 [Beta vulgaris subsp. vulgaris])	gi|75169883|sp|Q9CAG8.1|FBK28_ARATH(RecName: Full=F-box/kelch-repeat protein At1g67480)
Phn-m0132-3p	TRINITY_DN92117_c8_g1	1.5	1	22	56	77	AAACGTAAACAACATGATGTAT	||||||||||||||::|||*||	TTTGCATTTGTTGTGTTACCTA					K20352	TMED10, ERV25			GO:0016021(cellular_component:integral component of membrane); GO:0005789(cellular_component:endoplasmic reticulum membrane); GO:0006810(biological_process:transport)	gi|731327631|ref|XP_010674624.1|( PREDICTED: transmembrane emp24 domain-containing protein p24delta3-like [Beta vulgaris subsp. vulgaris])	gi|75247611|sp|Q8RWM6.1|P24D5_ARATH(RecName: Full=Transmembrane emp24 domain-containing protein p24delta5; AltName: Full=Atp24; AltName: Full=p24 family protein delta1c; Short=p24delta1c; AltName: Full=p24 family protein delta5; Short=p24delta5; Flags: Precursor)
Phn-m0132-3p	TRINITY_DN92815_c0_g2	1.5	1	22	2747	2768	AAACGTAAACAACATGATGTAT	|||||||||||||*:|||||||	TTTGCATTTGTTGGGCTACATA					K05917	CYP51	map00100(Steroid biosynthesis)	PF00067.19(p450:Cytochrome P450)	GO:0008398(molecular_function:sterol 14-demethylase activity); GO:0070988(biological_process:demethylation); GO:0005886(cellular_component:plasma membrane); GO:0005506(molecular_function:iron ion binding); GO:0020037(molecular_function:heme binding); GO:0032259(biological_process:methylation); GO:0016021(cellular_component:integral component of membrane); GO:0008168(molecular_function:methyltrans…	gi|731360761|ref|XP_010691994.1|( PREDICTED: obtusifoliol 14-alpha demethylase-like [Beta vulgaris subsp. vulgaris])	gi|75313134|sp|Q9SAA9.1|CP511_ARATH(RecName: Full=Sterol 14-demethylase; AltName: Full=Cytochrome P450 51A2; AltName: Full=Cytochrome P450 51G1; Short=AtCYP51; AltName: Full=Obtusifoliol 14-demethylase; AltName: Full=Protein EMBRYO DEFECTIVE 1738)
Phn-m0148-5p	TRINITY_DN91965_c3_g1	1.5	1	22	1339	1360	AGTAATGGATGGATGACGGATG	||||||||||||||||*|*|||	TCATTACCTACCTACTTCATAC					K04733	IRAK4			GO:0006468(biological_process:protein phosphorylation); GO:0005524(molecular_function:ATP binding); GO:0004674(molecular_function:protein serine/threonine kinase activity)	gi|731361754|ref|XP_010692535.1|( PREDICTED: probable serine/threonine-protein kinase Cx32, chloroplastic [Beta vulgaris subsp. vulgaris])	gi|49066036|sp|P27450.2|CX32_ARATH(RecName: Full=Probable serine/threonine-protein kinase Cx32, chloroplastic; Flags: Precursor)
Phn-m0150-5p	TRINITY_DN84341_c0_g1	1.5	1	24	906	929	ACCATACTGGGACGTGCCTCTAGG	||||||*||||||||:||||||||	TGGTATAACCCTGCATGGAGATCC					K00430	E1.11.1.7	map00940(Phenylpropanoid biosynthesis)	PF00141.20(peroxidase:Peroxidase)	GO:0046872(molecular_function:metal ion binding); GO:0098869(biological_process:cellular oxidant detoxification); GO:0006979(biological_process:response to oxidative stress); GO:0042744(biological_process:hydrogen peroxide catabolic process); GO:0020037(molecular_function:heme binding); GO:0004601(molecular_function:peroxidase activity); GO:0005576(cellular_component:extracellular region); GO:005…	gi|731337447|ref|XP_010679794.1|( PREDICTED: peroxidase 72-like [Beta vulgaris subsp. vulgaris])	gi|26397792|sp|Q9FJZ9.1|PER72_ARATH(RecName: Full=Peroxidase 72; Short=Atperox P72; AltName: Full=ATP6a; AltName: Full=PRXR8; Flags: Precursor)
Phn-m0154-3p	TRINITY_DN86241_c2_g4	1.5	1	24	1592	1615	AATTTCAGTCCAAAATAACAGGGC	|||||||||||||||*||*|||||	TTAAAGTCAGGTTTTCTTTTCCCG	COG2214(O:Posttranslational modification, protein turnover, chaperones ); COG0484(O:Posttranslational modification, protein turnover, chaperones )		COG2214(DNAj domain protein); COG0484(ATP binding to DnaK triggers the release of the substrate protein, thus completing the reaction cycle. Several rounds of ATP-dependent interactions between DnaJ, DnaK and GrpE are required for fully efficient folding. Also involved, together with DnaK and GrpE, in the DNA replication of plasmids through activation of initiation proteins (By similarity))		K09529	DNAJC9		PF00226.28(DnaJ:DnaJ domain)		gi|731324032|ref|XP_010672749.1|( PREDICTED: chaperone protein dnaJ 6 [Beta vulgaris subsp. vulgaris])	gi|66774117|sp|Q9FL54.1|DNAJ6_ARATH(RecName: Full=Chaperone protein dnaJ 6; Short=AtDjC6; Short=AtJ6)
Phn-m0154-3p	TRINITY_DN86386_c1_g4	1.5	1	24	540	563	AATTTCAGTCCAAAATAACAGGGC	|||||||||||||||*|||*||||	TTAAAGTCAGGTTTTCTTGCCCCG											gi|75136136|sp|Q6ZJ05.1|URH1_ORYSJ(RecName: Full=Probable uridine nucleosidase 1; AltName: Full=Uridine ribohydrolase 1)
Phn-m0154-3p	TRINITY_DN87114_c3_g1	1.5	1	24	3054	3076	AATTTCAGTCCAAAATAACAGGGC	|||||||||||||||*||*|||||	TTAAAGTCAGGTTTTCTT-TCCCG								PF13418.3(Kelch_4:Galactose oxidase, central domain); PF13415.3(Kelch_3:Galactose oxidase, central domain); PF13964.3(Kelch_6:Kelch motif); PF13854.3(Kelch_5:Kelch motif)		gi|731368314|ref|XP_010696079.1|( PREDICTED: F-box/kelch-repeat protein At1g51550 [Beta vulgaris subsp. vulgaris])	gi|75169531|sp|Q9C8K7.1|FBK21_ARATH(RecName: Full=F-box/kelch-repeat protein At1g51550)
Phn-m0154-3p	TRINITY_DN88551_c6_g1	1.5	1	24	1040	1064	AATTTCAGTCCAAAATAACAGGG-C	|||||||||||||||*|||||||*|	TTAAAGTCAGGTTTTTTTGTCCCAG										gi|1012327025|gb|KYP38774.1|( Retrovirus-related Pol polyprotein from transposon TNT 1-94 [Cajanus cajan])	gi|130582|sp|P10978.1|POLX_TOBAC(RecName: Full=Retrovirus-related Pol polyprotein from transposon TNT 1-94; Includes: RecName: Full=Protease; Includes: RecName: Full=Reverse transcriptase; Includes: RecName: Full=Endonuclease)
Phn-m0154-3p	TRINITY_DN89636_c0_g1	1.5	1	24	1011	1034	AATTTCAGTCCAAAATAACAGGGC	|||||||||||||||*||*|||||	TTAAAGTCAGGTTTTCTTATCCCG								PF05691.9(Raffinose_syn:Raffinose synthase or seed imbibition protein Sip1)		gi|902169093|gb|KNA07604.1|( hypothetical protein SOVF_170300 [Spinacia oleracea])	gi|269969644|sp|Q94A08.2|RFS2_ARATH(RecName: Full=Probable galactinol--sucrose galactosyltransferase 2; AltName: Full=Protein SEED IMBIBITION 2; AltName: Full=Raffinose synthase 2)
Phn-m0154-3p	TRINITY_DN92128_c5_g1	1.5	1	24	1587	1610	AATTTCAGTCCAAAATAACAGGGC	*||||||||||||||*||||||||	ATAAAGTCAGGTTTTCTTGTCCCG	COG2036(B:Chromatin structure and dynamics )		COG2036(Core component of nucleosome. Nucleosomes wrap and compact DNA into chromatin, limiting DNA accessibility to the cellular machineries which require DNA as a template. Histones thereby play a central role in transcription regulation, DNA repair, DNA replication and chromosomal stability. DNA accessibility is regulated via a complex set of post-translational modifications of histones, also …		K11253	H3		PF00125.21(Histone:Core histone H2A/H2B/H3/H4); PF15511.3(CENP-T_C:Centromere kinetochore component CENP-T histone fold); PF15630.3(CENP-S:CENP-S protein)	GO:0046982(molecular_function:protein heterodimerization activity); GO:0000786(cellular_component:nucleosome); GO:0016021(cellular_component:integral component of membrane); GO:0005634(cellular_component:nucleus); GO:0003677(molecular_function:DNA binding)	gi|604319816|gb|EYU30980.1|( hypothetical protein MIMGU_mgv1a014700mg [Erythranthe guttata])	gi|27734400|sp|P59169.2|H33_ARATH(RecName: Full=Histone H3.3; AltName: Full=Histone H3.2 >gi|54035960|sp|Q71V89.3|H33_GOSHI RecName: Full=Histone H3.3 >gi|59799551|sp|P69245.2|H33_LOLTE RecName: Full=Histone H3.3 >gi|59799580|sp|P69244.2|H33_MEDSA RecName: Full=Histone H3.3; AltName: Full=Histone H3.2; AltName: Full=Minor histone H3 >gi|73919839|sp|Q71H73.3|H33_VITVI RecName: Full=Histone H3.3 >g…
Phn-m0155-5p	TRINITY_DN85300_c3_g1	1.5	1	24	1147	1170	TTGGAAACAATCTCTTTGTGATAT	::||||||||:||||||||||||:	GGCCTTTGTTGGAGAAACACTATG										gi|763768786|gb|KJB36001.1|( hypothetical protein B456_006G141600 [Gossypium raimondii])	gi|75249772|sp|Q94A68.1|Y1669_ARATH(RecName: Full=Uncharacterized oxidoreductase At1g06690, chloroplastic; Flags: Precursor)
Phn-m0155-5p	TRINITY_DN88480_c4_g2	1.5	1	24	2268	2292	TTGGAAACAATCTCTTTGTG-ATAT	:|||||||||:|||||||||*|:||	GACCTTTGTTGGAGAAACACATGTA								PF00657.19(Lipase_GDSL:GDSL-like Lipase/Acylhydrolase)	GO:0016788(molecular_function:hydrolase activity, acting on ester bonds)	gi|31616513|gb|AAP55714.1|( GDSL-lipase [Oxybasis rubra])	gi|229889775|sp|Q9SYF5.2|GLIP3_ARATH(RecName: Full=GDSL esterase/lipase 3; AltName: Full=Extracellular lipase 3; Flags: Precursor)
Phn-m0155-5p	TRINITY_DN88766_c1_g5	1.5	1	24	342	365	TTGGAAACAATCTCTTTGTGATAT	||:|||||||*|||||||||||||	AATCTTTGTTTGAGAAACACTATA					K11752	ribD	map00740(Riboflavin metabolism)		GO:0009231(biological_process:riboflavin biosynthetic process); GO:0008835(molecular_function:diaminohydroxyphosphoribosylaminopyrimidine deaminase activity); GO:0008270(molecular_function:zinc ion binding); GO:0055114(biological_process:oxidation-reduction process)	gi|1012008288|ref|XP_015947350.1|( PREDICTED: riboflavin biosynthesis protein PYRD, chloroplastic-like [Arachis duranensis])	gi|519889516|sp|B6TRH4.1|RIBD_MAIZE(RecName: Full=Riboflavin biosynthesis protein PYRD, chloroplastic; Includes: RecName: Full=Diaminohydroxyphosphoribosylaminopyrimidine deaminase; Short=DRAP deaminase; AltName: Full=Riboflavin-specific deaminase; Includes: RecName: Full=Inactive 5-amino-6-(5-phosphoribosylamino)uracil reductase; AltName: Full=HTP reductase; Flags: Precursor)
Phn-m0155-5p	TRINITY_DN89978_c3_g1	1.5	1	24	4906	4929	TTGGAAACAATCTCTTTGTGATAT	*||||||||*||||||||||||||	TACCTTTGTCAGAGAAACACTATA	COG4886(S:Function unknown )		COG4886(leucine Rich Repeat)					PF12937.4(F-box-like:F-box-like); PF00646.30(F-box:F-box domain); PF13855.3(LRR_8:Leucine rich repeat); PF00560.30(LRR_1:Leucine Rich Repeat); PF12799.4(LRR_4:Leucine Rich repeats (2 copies)); PF08263.9(LRRNT_2:Leucine rich repeat N-terminal domain); PF13516.3(LRR_6:Leucine Rich repeat)		gi|902239973|gb|KNA25822.1|( hypothetical protein SOVF_003030 [Spinacia oleracea])	gi|20178285|sp|Q00874.2|DR100_ARATH(RecName: Full=DNA-damage-repair/toleration protein DRT100; Flags: Precursor)
Phn-m0155-5p	TRINITY_DN91473_c1_g3	1.5	1	24	1440	1463	TTGGAAACAATCTCTTTGTGATAT	|||||||*||:|||||||||||||	AACCTTTATTGGAGAAACACTATA					K20241	WDR44, RAB11BP		PF00400.29(WD40:WD domain, G-beta repeat); PF12894.4(ANAPC4_WD40:Anaphase-promoting complex subunit 4 WD40 domain)		gi|731333705|ref|XP_010677871.1|( PREDICTED: WD repeat-containing protein 44 [Beta vulgaris subsp. vulgaris])	gi|75075025|sp|Q9XSC3.1|WDR44_BOVIN(RecName: Full=WD repeat-containing protein 44; AltName: Full=Rab11-binding protein; AltName: Full=Rabphilin-11)
Phn-m0155-5p	TRINITY_DN92263_c2_g1	1.5	1	24	693	716	TTGGAAACAATCTCTTTGTGATAT	|||:||||||:||||:||||||||	AACTTTTGTTGGAGAGACACTATA									GO:0004707(molecular_function:MAP kinase activity); GO:0005622(cellular_component:intracellular); GO:0000165(biological_process:MAPK cascade); GO:0005524(molecular_function:ATP binding)	gi|674242958|gb|KFK35723.1|( hypothetical protein AALP_AA4G028400 [Arabis alpina])	gi|334302931|sp|Q9C5C0.4|MPK18_ARATH(RecName: Full=Mitogen-activated protein kinase 18; Short=AtMPK18; Short=MAP kinase 18)
Phn-m0155-5p	TRINITY_DN92414_c1_g1	1.5	1	24	20	43	TTGGAAACAATCTCTTTGTGATAT	|:|||||*||||||||||||||||	AGCCTTTATTAGAGAAACACTATA	COG0724(R:General function prediction only )		COG0724(Rna-binding protein)					PF00076.19(RRM_1:RNA recognition motif. (a.k.a. RRM, RBD, or RNP domain)); PF07145.12(PAM2:Ataxin-2 C-terminal region)	GO:0003676(molecular_function:nucleic acid binding); GO:0000166(molecular_function:nucleotide binding)	gi|731371754|ref|XP_010666139.1|( PREDICTED: polyadenylate-binding protein-interacting protein 11 isoform X2 [Beta vulgaris subsp. vulgaris])	gi|75336843|sp|Q9S7N9.1|CID12_ARATH(RecName: Full=Polyadenylate-binding protein-interacting protein 12; Short=PABP-interacting protein 12; Short=Poly(A)-binding protein-interacting protein 12; AltName: Full=PAM2-containing protein CID12; AltName: Full=Protein CTC-INTERACTING DOMAIN 12; AltName: Full=RNA-binding protein 37; Short=AtRBP37)
Phn-m0162-5p	TRINITY_DN87515_c2_g1	1.5	1	24	5662	5686	AAATGAGATTGTACCACCGGGTG-G	||||||||||||*||||||||||*|	TTTACTCTAACACGGTGGCCCACAC					K00142	AASDH		PF00501.25(AMP-binding:AMP-binding enzyme); PF13570.3(PQQ_3:PQQ-like domain); PF13360.3(PQQ_2:PQQ-like domain); PF01011.18(PQQ:PQQ enzyme repeat); PF13193.3(AMP-binding_C:AMP-binding enzyme C-terminal domain); PF00550.22(PP-binding:Phosphopantetheine attachment site); PF14368.3(LTP_2:Probable lipid transfer); PF00234.19(Tryp_alpha_amyl:Protease inhibitor/seed storage/LTP family)		gi|731336089|ref|XP_010679069.1|( PREDICTED: putative acyl-activating enzyme 19 [Beta vulgaris subsp. vulgaris])	gi|378548266|sp|F4K1G2.1|AEE19_ARATH(RecName: Full=Putative acyl-activating enzyme 19)
Phn-m0170-3p	TRINITY_DN86056_c2_g2	1.5	1	23	3437	3459	AAGGGAGGTTCCATCCTAAAACC	*||||||||||||||||||||**	GTCCCTCCAAGGTAGGATTTTAA		NOG00787(U:Intracellular trafficking, secretion, and vesicular transport )		NOG00787(solute carrier family 35 member E1)	K15283	SLC35E1		PF03151.13(TPT:Triose-phosphate Transporter family); PF00892.17(EamA:EamA-like transporter family); PF02390.14(Methyltransf_4:Putative methyltransferase)	GO:0016021(cellular_component:integral component of membrane); GO:0006810(biological_process:transport); GO:0005215(molecular_function:transporter activity)	gi|731360624|ref|XP_010691923.1|( PREDICTED: xylulose 5-phosphate/phosphate translocator, chloroplastic [Beta vulgaris subsp. vulgaris])	gi|75174059|sp|Q9LF61.1|XPT_ARATH(RecName: Full=Xylulose 5-phosphate/phosphate translocator, chloroplastic; Short=Xul-5-P/phosphate translocator; Flags: Precursor)
Phn-m0170-3p	TRINITY_DN86245_c0_g3	1.5	1	23	1198	1220	AAGGGAGGTTCCATCCTAAAACC	|||||*|:|||||||||||||||	TTCCCCCTAAGGTAGGATTTTGG									GO:0016020(cellular_component:membrane)	gi|731366393|ref|XP_010695046.1|( PREDICTED: G-type lectin S-receptor-like serine/threonine-protein kinase RLK1 [Beta vulgaris subsp. vulgaris])	gi|75326736|sp|Q7FAZ3.1|LERK1_ORYSJ(RecName: Full=G-type lectin S-receptor-like serine/threonine-protein kinase LECRK1; Short=OsLecRK1; AltName: Full=OsRLCK134; Flags: Precursor)
Phn-m0170-3p	TRINITY_DN88321_c0_g1	1.5	1	23	28	50	AAGGGAGGTTCCATCCTAAAACC	|||:|||||||*|||||||||||	TTCTCTCCAAGATAGGATTTTGG	COG0462(F:Nucleotide transport and metabolism )		COG0462(Phosphoribosyl pyrophosphate synthase)					PF00156.24(Pribosyltran:Phosphoribosyl transferase domain); PF13793.3(Pribosyltran_N:N-terminal domain of ribose phosphate pyrophosphokinase); PF14572.3(Pribosyl_synth:Phosphoribosyl synthetase-associated domain)	GO:0005739(cellular_component:mitochondrion); GO:0009165(biological_process:nucleotide biosynthetic process); GO:0009116(biological_process:nucleoside metabolic process); GO:0005524(molecular_function:ATP binding); GO:0000287(molecular_function:magnesium ion binding); GO:0016310(biological_process:phosphorylation); GO:0016301(molecular_function:kinase activity); GO:0004749(molecular_function:ribo…	gi|731342502|ref|XP_010682425.1|( PREDICTED: ribose-phosphate pyrophosphokinase 3, mitochondrial [Beta vulgaris subsp. vulgaris])	gi|62286956|sp|Q9XGA0.1|KPRS3_SPIOL(RecName: Full=Ribose-phosphate pyrophosphokinase 3, mitochondrial; AltName: Full=Phosphoribosyl pyrophosphate synthase 3; Flags: Precursor)
Phn-m0170-3p	TRINITY_DN88416_c1_g3	1.5	1	23	254	276	AAGGGAGGTTCCATCCTAAAACC	|||||||||||||||*||||||*	TTCCCTCCAAGGTAGAATTTTGA					K19791	FET3_5				gi|703150530|ref|XP_010109886.1|( L-ascorbate oxidase-like protein [Morus notabilis])	gi|128592|sp|P29162.1|ASOL_TOBAC(RecName: Full=L-ascorbate oxidase homolog; AltName: Full=Pollen-specific protein NTP303; Flags: Precursor [Nicotiana tabacum])
Phn-m0170-3p	TRINITY_DN92012_c3_g2	1.5	1	23	16	38	AAGGGAGGTTCCATCCTAAAACC	|*:||||||||||||||||||||	TATCCTCCAAGGTAGGATTTTGG	COG0387(P:Inorganic ion transport and metabolism )		COG0387(Calcium Proton)		K07300	chaA, CAX		PF01699.21(Na_Ca_ex:Sodium/calcium exchanger protein)	GO:0015369(molecular_function:calcium:proton antiporter activity); GO:0070588(biological_process:calcium ion transmembrane transport); GO:0016021(cellular_component:integral component of membrane)	gi|731351942|ref|XP_010687286.1|( PREDICTED: vacuolar cation/proton exchanger 2-like [Beta vulgaris subsp. vulgaris])	gi|73917677|sp|Q5KQN0.2|CAX2_ORYSJ(RecName: Full=Vacuolar cation/proton exchanger 2; AltName: Full=Ca(2+)/H(+) exchanger 2; AltName: Full=OsCAX2)
Phn-m0170-3p	TRINITY_DN93275_c2_g2	1.5	1	23	64	86	AAGGGAGGTTCCATCCTAAAACC	||||||*|||||||||||||||*	TTCCCTACAAGGTAGGATTTTGA										gi|120026|sp|P04669.1|FER_SILLB(FER_SILLB RecName: Full=Ferredoxin, chloroplastic; Flags: Precursor)	gi|120026|sp|P04669.1|FER_SILLB(RecName: Full=Ferredoxin, chloroplastic; Flags: Precursor)
Phn-m0173-5p	TRINITY_DN86953_c1_g1	1.5	1	23	1858	1880	TCGAACTCCTGACCACTTGGTTA	|||||*|||||||||||||*|||	AGCTTAAGGACTGGTGAACAAAT	COG1949(A:RNA processing and modification )		COG1949(3'-to-5' exoribonuclease specific for small oligoribonucleotides (By similarity))		K13288	orn, REX2, REXO2	map03008(Ribosome biogenesis in eukaryotes)	PF00929.21(RNase_T:Exonuclease)	GO:0000175(molecular_function:3'-5'-exoribonuclease activity); GO:0003676(molecular_function:nucleic acid binding); GO:0090503(biological_process:RNA phosphodiester bond hydrolysis, exonucleolytic); GO:0005739(cellular_component:mitochondrion)	gi|568832421|ref|XP_006470431.1|( PREDICTED: oligoribonuclease [Citrus sinensis])	gi|83305201|sp|Q9ZVE0.2|ORN_ARATH(RecName: Full=Oligoribonuclease)
Phn-m0173-5p	TRINITY_DN88470_c4_g3	1.5	1	23	1439	1461	TCGAACTCCTGACCACTTGGTTA	||||||:|*||||||||||||||	AGCTTGGGAACTGGTGAACCAAT								PF04564.12(U-box:U-box domain); PF00514.20(Arm:Armadillo/beta-catenin-like repeat)	GO:0016567(biological_process:protein ubiquitination); GO:0004842(molecular_function:ubiquitin-protein transferase activity)	gi|902216991|gb|KNA17583.1|( hypothetical protein SOVF_078190 [Spinacia oleracea])	gi|172045563|sp|O48700.2|PUB6_ARATH(RecName: Full=U-box domain-containing protein 6; AltName: Full=Plant U-box protein 6)
Phn-m0182-5p	TRINITY_DN91640_c2_g1	1.5	1	24	155	178	AGGTTATATAACGTTGATTGAGCC	|||||||||||||||*||||*|||	TCCAATATATTGCAAGTAACCCGG					K20478	GOLGB1				gi|902235692|gb|KNA24039.1|( hypothetical protein SOVF_019360 [Spinacia oleracea])	gi|754388954|sp|F4HZB5.1|NET1D_ARATH(RecName: Full=Protein NETWORKED 1D)
Phn-m0185-3p	TRINITY_DN92600_c0_g3	1.5	1	22	1960	1982	ATGAGACAAAAACCATGAA-TTG	|||*|||||||||||||||*|||	TACCCTGTTTTTGGTACTTCAAC					K08869	ADCK, ABC1				gi|731314196|ref|XP_010684572.1|( PREDICTED: aarF domain-containing protein kinase 4 isoform X1 [Beta vulgaris subsp. vulgaris])	gi|75265572|sp|Q9SBB2.1|ABC1_ARATH(RecName: Full=Protein ABC transporter 1, mitochondrial; Short=ABC1At; Short=AtABC1)
Phn-m0189-5p	TRINITY_DN91313_c3_g1	1.5	1	21	92	112	TTTTGCATAGGCCATCAAGTA	||||:||:||||||||||*||	AAAATGTGTCCGGTAGTTAAT					K17964	LRPPRC		PF13041.3(PPR_2:PPR repeat family); PF12854.4(PPR_1:PPR repeat); PF01535.17(PPR:PPR repeat); PF13812.3(PPR_3:Pentatricopeptide repeat domain); PF17177.1(PPR_long:Pentacotripeptide-repeat region of PROPR); PF10037.6(MRP-S27:Mitochondrial 28S ribosomal protein S27)		gi|731326856|ref|XP_010674229.1|( PREDICTED: putative pentatricopeptide repeat-containing protein At1g12700, mitochondrial [Beta vulgaris subsp. vulgaris])	gi|193806279|sp|Q9SH60.2|PP103_ARATH(RecName: Full=Pentatricopeptide repeat-containing protein At1g64100)
Phn-m0190-5p	TRINITY_DN91313_c3_g1	1.5	1	21	92	112	TTTTGCATAGGCCATCAAGTA	||||:||:||||||||||*||	AAAATGTGTCCGGTAGTTAAT					K17964	LRPPRC		PF13041.3(PPR_2:PPR repeat family); PF12854.4(PPR_1:PPR repeat); PF01535.17(PPR:PPR repeat); PF13812.3(PPR_3:Pentatricopeptide repeat domain); PF17177.1(PPR_long:Pentacotripeptide-repeat region of PROPR); PF10037.6(MRP-S27:Mitochondrial 28S ribosomal protein S27)		gi|731326856|ref|XP_010674229.1|( PREDICTED: putative pentatricopeptide repeat-containing protein At1g12700, mitochondrial [Beta vulgaris subsp. vulgaris])	gi|193806279|sp|Q9SH60.2|PP103_ARATH(RecName: Full=Pentatricopeptide repeat-containing protein At1g64100)
Phn-m0196-3p	TRINITY_DN89382_c5_g2	1.5	1	24	196	219	AGGGTGTGTTTGGATAGACAAATT	||||||||||||||||**||||||	TCCCACACAAACCTATGAGTTTAA					K01945	purD	map00230(Purine metabolism)	PF01071.16(GARS_A:Phosphoribosylglycinamide synthetase, ATP-grasp (A) domain); PF02843.13(GARS_C:Phosphoribosylglycinamide synthetase, C domain); PF02844.12(GARS_N:Phosphoribosylglycinamide synthetase, N domain)	GO:0004637(molecular_function:phosphoribosylamine-glycine ligase activity); GO:0046872(molecular_function:metal ion binding); GO:0005524(molecular_function:ATP binding); GO:0009113(biological_process:purine nucleobase biosynthetic process)	gi|902229387|gb|KNA21487.1|( hypothetical protein SOVF_042620 [Spinacia oleracea])	gi|12644306|sp|P52420.2|PUR2_ARATH(RecName: Full=Phosphoribosylamine--glycine ligase, chloroplastic; AltName: Full=Glycinamide ribonucleotide synthetase; Short=GARS; AltName: Full=Phosphoribosylglycinamide synthetase; Flags: Precursor)
Phn-m0196-3p	TRINITY_DN89867_c1_g1	1.5	1	24	33	56	AGGGTGTGTTTGGATAGACAAATT	||||||||||||||||*|*|||||	TCCCACACAAACCTATGTATTTAA		NOG00563(T:Signal transduction mechanisms )		NOG00563(Mitogen-activated protein kinase)	K20535	MPK1_2	map04016(MAPK signaling pathway - plant)	PF00069.22(Pkinase:Protein kinase domain); PF07714.14(Pkinase_Tyr:Protein tyrosine kinase)	GO:0004707(molecular_function:MAP kinase activity); GO:0005622(cellular_component:intracellular); GO:0000165(biological_process:MAPK cascade); GO:0005524(molecular_function:ATP binding)	gi|902178258|gb|KNA09102.1|( hypothetical protein SOVF_156650 [Spinacia oleracea])	gi|2499614|sp|Q40517.1|NTF3_TOBAC(RecName: Full=Mitogen-activated protein kinase homolog NTF3; AltName: Full=P43)
Phn-m0196-3p	TRINITY_DN91924_c0_g1	1.5	1	24	1729	1751	AGGGTGTGTTTGGATAGACAAATT	|||||||||||||||||*||**||	TCCCACACAAACCTATC-GTAAAA					K02978	RP-S27e, RPS27	map03010(Ribosome)		GO:0005840(cellular_component:ribosome); GO:0046872(molecular_function:metal ion binding); GO:0003735(molecular_function:structural constituent of ribosome); GO:0006412(biological_process:translation)	gi|697179428|ref|XP_009598692.1|( PREDICTED: 40S ribosomal protein S27-2-like [Nicotiana tomentosiformis])	gi|73917991|sp|Q9M2F1.2|RS272_ARATH(RecName: Full=40S ribosomal protein S27-2)
Phn-m0196-3p	TRINITY_DN93115_c3_g4	1.5	1	24	602	625	AGGGTGTGTTTGGATAGACAAATT	||||||||||||||||*|*|||||	TCCCACACAAACCTATGTATTTAA								PF00078.24(RVT_1:Reverse transcriptase (RNA-dependent DNA polymerase))		gi|731375553|ref|XP_010667299.1|( PREDICTED: uncharacterized protein LOC104884358 [Beta vulgaris subsp. vulgaris])	gi|74705367|sp|O00370.1|LORF2_HUMAN(RecName: Full=LINE-1 retrotransposable element ORF2 protein; Short=ORF2p; Includes: RecName: Full=Reverse transcriptase; Includes: RecName: Full=Endonuclease)
Phn-m0199-5p	TRINITY_DN92699_c0_g4	1.5	1	23	27	49	GGAAATACTCATGATCAACACCA	|||||||||*||||||||||*||	CCTTTATGAATACTAGTTGTAGT					K02265	COX5B	map00190(Oxidative phosphorylation)		GO:1902600(biological_process:hydrogen ion transmembrane transport); GO:0005740(cellular_component:mitochondrial envelope); GO:0004129(molecular_function:cytochrome-c oxidase activity)	gi|698527673|ref|XP_009760679.1|( PREDICTED: cytochrome c oxidase subunit 5b-1, mitochondrial-like [Nicotiana sylvestris])	gi|75207492|sp|Q9SSB8.1|CX5B2_ARATH(RecName: Full=Cytochrome c oxidase subunit 5b-2, mitochondrial; Short=AtCOX5b-2; Flags: Precursor)
Phn-m0200-5p	TRINITY_DN73463_c0_g1	1.5	1	23	407	429	TATTGTGACCATCATTTAATCTT	|||||:||||||||||||||**|	ATAACGCTGGTAGTAAATTATTA										gi|870867869|gb|KMT18738.1|( hypothetical protein BVRB_2g028600 [Beta vulgaris subsp. vulgaris])	gi|75160399|sp|Q8S8A0.1|GDU4_ARATH(RecName: Full=Protein GLUTAMINE DUMPER 4)
Phn-m0201-5p	TRINITY_DN73463_c0_g1	1.5	1	23	407	429	TATTGTGACCATCATTTAATCTT	|||||:||||||||||||||**|	ATAACGCTGGTAGTAAATTATTA										gi|870867869|gb|KMT18738.1|( hypothetical protein BVRB_2g028600 [Beta vulgaris subsp. vulgaris])	gi|75160399|sp|Q8S8A0.1|GDU4_ARATH(RecName: Full=Protein GLUTAMINE DUMPER 4)
Phn-m0216-5p	TRINITY_DN82241_c0_g1	1.5	1	24	1843	1866	GTTGTATGTATATAACGGGGTTTT	||||||||||||:||||:|*||:|	CAACATACATATGTTGCTCAAAGA								PF13855.3(LRR_8:Leucine rich repeat); PF00560.30(LRR_1:Leucine Rich Repeat); PF12799.4(LRR_4:Leucine Rich repeats (2 copies)); PF08263.9(LRRNT_2:Leucine rich repeat N-terminal domain)		gi|902239973|gb|KNA25822.1|( hypothetical protein SOVF_003030 [Spinacia oleracea])	gi|20178285|sp|Q00874.2|DR100_ARATH(RecName: Full=DNA-damage-repair/toleration protein DRT100; Flags: Precursor)
Phn-m0220-5p	TRINITY_DN85801_c0_g2	1.5	1	24	50	73	AAGGCACTGGGATAATGTTGTTGT	||||||||:||*||||||||||||	TTCCGTGATCCCATTACAACAACA	COG0123(B:Chromatin structure and dynamics); COG0123(Q:Secondary metabolites biosynthesis, transport and catabolism)		COG0123(Histone deacetylase); COG0123(Histone deacetylase)					PF02148.16(zf-UBP:Zn-finger in ubiquitin-hydrolases and other protein)	GO:0008270(molecular_function:zinc ion binding)	gi|731352343|ref|XP_010687497.1|( PREDICTED: histone deacetylase 6 [Beta vulgaris subsp. vulgaris])	gi|205371758|sp|Q9UBN7.2|HDAC6_HUMAN(RecName: Full=Histone deacetylase 6; Short=HD6)
Phn-m0220-5p	TRINITY_DN86899_c2_g1	1.5	1	24	2391	2414	AAGGCACTGGGATAATGTTGTTGT	|||:|||||*||||||||||||||	TTCTGTGACACTATTACAACAACA					K14488	SAUR	map04075(Plant hormone signal transduction)	PF02519.11(Auxin_inducible:Auxin responsive protein)	GO:0009733(biological_process:response to auxin)	gi|902206051|gb|KNA15361.1|( hypothetical protein SOVF_098900 [Spinacia oleracea])	gi|75171033|sp|Q9FJF9.1|SAU21_ARATH(RecName: Full=Auxin-responsive protein SAUR21; AltName: Full=Protein SMALL AUXIN UP RNA 21)
Phn-m0220-5p	TRINITY_DN87140_c2_g1	1.5	1	24	1140	1163	AAGGCACTGGGATAATGTTGTTGT	|||||||||:|*||||||||||||	TTCCGTGACTCCATTACAACAACA	COG0100(J:Translation, ribosomal structure and biogenesis )		COG0100(Located on the platform of the 30S subunit, it bridges several disparate RNA helices of the 16S rRNA. Forms part of the Shine-Dalgarno cleft in the 70S ribosome (By similarity))		K02948	RP-S11, MRPS11, rpsK	map03010(Ribosome)	PF00411.16(Ribosomal_S11:Ribosomal protein S11)	GO:0005840(cellular_component:ribosome); GO:0003735(molecular_function:structural constituent of ribosome); GO:0006412(biological_process:translation)	gi|731347672|ref|XP_010685107.1|( PREDICTED: uncharacterized protein LOC104899588 [Beta vulgaris subsp. vulgaris])	gi|75304484|sp|Q8VZT8.1|RT11_ARATH(RecName: Full=Probable ribosomal protein S11, mitochondrial; Short=MRP-S11; Short=S11mt; AltName: Full=Protein NUCLEAR FUSION DEFECTIVE 3, mitochondrial; Flags: Precursor)
Phn-m0220-5p	TRINITY_DN90150_c1_g2	1.5	1	24	1518	1541	AAGGCACTGGGATAATGTTGTTGT	||||||||:||*||||||||||||	TTCCGTGATCCCATTACAACAACA					K14545	RRP7	map03008(Ribosome biogenesis in eukaryotes)	PF12923.4(RRP7:Ribosomal RNA-processing protein 7 (RRP7))		gi|902188678|gb|KNA11211.1|( hypothetical protein SOVF_137280 isoform A [Spinacia oleracea])	gi|66773938|sp|Q9D1C9.1|RRP7A_MOUSE(RecName: Full=Ribosomal RNA-processing protein 7 homolog A; AltName: Full=Gastric cancer antigen Zg14 homolog)
Phn-m0220-5p	TRINITY_DN90661_c2_g2	1.5	1	24	1467	1490	AAGGCACTGGGATAATGTTGTTGT	||||||*|||||||||:|||||||	TTCCGTAACCCTATTATAACAACA								PF04845.10(PurA:PurA ssDNA and RNA-binding protein); PF11680.5(DUF3276:Protein of unknown function (DUF3276))		gi|848885619|ref|XP_012843055.1|( PREDICTED: transcription factor Pur-alpha 1 isoform X1 [Erythranthe guttata])	gi|75206587|sp|Q9SKZ1.2|PUR_ARATH(RecName: Full=Transcription factor Pur-alpha 1; AltName: Full=Purine-rich single-stranded DNA-binding protein alpha 1)
Phn-m0220-5p	TRINITY_DN92709_c3_g1	1.5	1	24	643	666	AAGGCACTGGGATAATGTTGTTGT	*||:||||||||||||:|||||||	ATCTGTGACCCTATTATAACAACA					K08874	TRRAP				gi|147789625|emb|CAN65160.1|( hypothetical protein VITISV_021747 [Vitis vinifera])	gi|122114224|sp|Q54T85.2|TRA1_DICDI(RecName: Full=Probable transcription-associated protein 1)
Phn-m0222-5p	TRINITY_DN86081_c0_g1	1.5	1	21	1111	1131	CTAAATTGCAATTCATGCCTT	|||||||:||||||||*||||	GATTTAATGTTAAGTAAGGAA								PF02362.18(B3:B3 DNA binding domain)		gi|902218683|gb|KNA18097.1|( hypothetical protein SOVF_073880 isoform A [Spinacia oleracea])	gi|122235052|sp|Q0JP99.1|Y1341_ORYSJ(RecName: Full=B3 domain-containing protein Os01g0234100)
Phn-m0224-5p	TRINITY_DN86081_c0_g1	1.5	1	21	1111	1131	CTAAATTGCAATTCATGCCTT	|||||||:||||||||*||||	GATTTAATGTTAAGTAAGGAA								PF02362.18(B3:B3 DNA binding domain)		gi|902218683|gb|KNA18097.1|( hypothetical protein SOVF_073880 isoform A [Spinacia oleracea])	gi|122235052|sp|Q0JP99.1|Y1341_ORYSJ(RecName: Full=B3 domain-containing protein Os01g0234100)
Phn-m0225-5p	TRINITY_DN86081_c0_g1	1.5	1	21	1111	1131	CTAAATTGCAATTCATGCCTT	|||||||:||||||||*||||	GATTTAATGTTAAGTAAGGAA								PF02362.18(B3:B3 DNA binding domain)		gi|902218683|gb|KNA18097.1|( hypothetical protein SOVF_073880 isoform A [Spinacia oleracea])	gi|122235052|sp|Q0JP99.1|Y1341_ORYSJ(RecName: Full=B3 domain-containing protein Os01g0234100)
Phn-m0229-3p	TRINITY_DN86114_c0_g5	1.5	1	22	1120	1141	TGGCCTGTGGCTGTTTTGGGAG	||:|||||||||||:||*||||	ACTGGACACCGACAGAAACCTC								PF00665.23(rve:Integrase core domain); PF13456.3(RVT_3:Reverse transcriptase-like)		gi|731324149|ref|XP_010672814.1|( PREDICTED: uncharacterized protein LOC104889317 [Beta vulgaris subsp. vulgaris])	gi|28380144|sp|Q9UR07.1|TF211_SCHPO(RecName: Full=Transposon Tf2-11 polyprotein; AltName: Full=Retrotransposable element Tf2 155 kDa protein)
Phn-m0259-5p	TRINITY_DN87796_c1_g3	1.5	1	23	2018	2040	AAAACTATTTCGGCACGACCGTA	||||||||||||||||:||*||*	TTTTGATAAAGCCGTGTTGACAC					K16297	SCPL-II		PF00450.19(Peptidase_S10:Serine carboxypeptidase)	GO:0004185(molecular_function:serine-type carboxypeptidase activity); GO:0005773(cellular_component:vacuole); GO:0051603(biological_process:proteolysis involved in cellular protein catabolic process)	gi|902206392|gb|KNA15447.1|( hypothetical protein SOVF_098170 [Spinacia oleracea])	gi|334302854|sp|Q9LSM9.2|SCP33_ARATH(RecName: Full=Serine carboxypeptidase-like 33; Flags: Precursor)
Phn-m0259-5p	TRINITY_DN87914_c2_g1	1.5	1	23	59	81	AAAACTATTTCGGCACGACCGTA	||||*|||||||||||||||||*	TTTTCATAAAGCCGTGCTGGCAC								PF03195.11(DUF260:Protein of unknown function DUF260)		gi|225455928|ref|XP_002276899.1|( PREDICTED: LOB domain-containing protein 41 [Vitis vinifera])	gi|29428077|sp|Q9ZW96.1|LBD40_ARATH(RecName: Full=LOB domain-containing protein 40; AltName: Full=ASYMMETRIC LEAVES 2-like protein 37; Short=AS2-like protein 37)
Phn-m0259-5p	TRINITY_DN92446_c6_g2	1.5	1	23	110	132	AAAACTATTTCGGCACGACCGTA	||||||||||||||||*|||||*	TTTTGATAAAGCCGTGGTGGCAC	COG0010(E:Amino acid transport and metabolism )		COG0010(agmatinase (EC 3.5.3.11))		K01476	E3.5.3.1, rocF, arg	map00220(Arginine biosynthesis); map00330(Arginine and proline metabolism)	PF00491.18(Arginase:Arginase family)	GO:0046872(molecular_function:metal ion binding); GO:0016813(molecular_function:hydrolase activity, acting on carbon-nitrogen (but not peptide) bonds, in linear amidines)	gi|645253527|ref|XP_008232616.1|( PREDICTED: arginase 1, mitochondrial [Prunus mume])	gi|1168493|sp|P46637.1|ARGI1_ARATH(RecName: Full=Arginase 1, mitochondrial; AltName: Full=Arginine amidohydrolase 1; Flags: Precursor)
Phn-m0270-3p	TRINITY_DN91426_c1_g6	1.5	1	21	740	760	AAAATTCCAGTCGATCGACTC	|||||:|*|||||||||||||	TTTTAGGTTCAGCTAGCTGAG										gi|1012331538|gb|KYP43009.1|( Retrovirus-related Pol polyprotein from transposon TNT 1-94 [Cajanus cajan])	gi|130582|sp|P10978.1|POLX_TOBAC(RecName: Full=Retrovirus-related Pol polyprotein from transposon TNT 1-94; Includes: RecName: Full=Protease; Includes: RecName: Full=Reverse transcriptase; Includes: RecName: Full=Endonuclease)
Phn-m0271-5p	TRINITY_DN90558_c3_g1	1.5	1	20	1370	1389	GGAATTTGAGTCGATCGACT	*||*||||||||||||||||	GCTAAAACTCAGCTAGCTGA					K04554	UBE2J2, NCUBE2, UBC6	map04120(Ubiquitin mediated proteolysis); map04141(Protein processing in endoplasmic reticulum)			gi|1028997436|ref|XP_016753491.1|( PREDICTED: ubiquitin-conjugating enzyme E2 34-like [Gossypium hirsutum])	gi|75309152|sp|Q9FK29.1|UBC33_ARATH(RecName: Full=Probable ubiquitin-conjugating enzyme E2 33; AltName: Full=E2 ubiquitin-conjugating enzyme 33; AltName: Full=Ubiquitin carrier protein 33)
Phn-m0271-5p	TRINITY_DN90558_c3_g1	1.5	1	20	1305	1324	GGAATTTGAGTCGATCGACT	|:*|||||||||||||||||	CTGTAAACTCAGCTAGCTGA					K04554	UBE2J2, NCUBE2, UBC6	map04120(Ubiquitin mediated proteolysis); map04141(Protein processing in endoplasmic reticulum)			gi|1028997436|ref|XP_016753491.1|( PREDICTED: ubiquitin-conjugating enzyme E2 34-like [Gossypium hirsutum])	gi|75309152|sp|Q9FK29.1|UBC33_ARATH(RecName: Full=Probable ubiquitin-conjugating enzyme E2 33; AltName: Full=E2 ubiquitin-conjugating enzyme 33; AltName: Full=Ubiquitin carrier protein 33)
Phn-m0271-5p	TRINITY_DN90558_c3_g1	1.5	1	20	1285	1304	GGAATTTGAGTCGATCGACT	|||*||:|||||||||||||	CCTAAAGCTCAGCTAGCTGA					K04554	UBE2J2, NCUBE2, UBC6	map04120(Ubiquitin mediated proteolysis); map04141(Protein processing in endoplasmic reticulum)			gi|1028997436|ref|XP_016753491.1|( PREDICTED: ubiquitin-conjugating enzyme E2 34-like [Gossypium hirsutum])	gi|75309152|sp|Q9FK29.1|UBC33_ARATH(RecName: Full=Probable ubiquitin-conjugating enzyme E2 33; AltName: Full=E2 ubiquitin-conjugating enzyme 33; AltName: Full=Ubiquitin carrier protein 33)
Phn-m0279-3p	TRINITY_DN86164_c3_g1	1.5	1	23	2634	2656	TTGGGACACATGTTAGAAAAACC	||:|||||||:||||:|||||||	AATCCTGTGTGCAATTTTTTTGG								PF14299.3(PP2:Phloem protein 2)		gi|731326787|ref|XP_010674196.1|( PREDICTED: putative F-box protein PP2-B12 [Beta vulgaris subsp. vulgaris])	gi|75223286|sp|Q6NPT8.1|PP2B1_ARATH(RecName: Full=F-box protein PP2-B1; AltName: Full=Protein PHLOEM PROTEIN 2-LIKE B1; Short=AtPP2-B1; AltName: Full=SKP1-interacting partner 21)
Phn-m0279-3p	TRINITY_DN89217_c0_g7	1.5	1	23	1306	1327	TTGGGACACATGTTAGAAAAACC	||::|||||||||||||*|||||	AATTCTGTGTACAATCT-TTTGG		NOG125866(U:Intracellular trafficking, secretion, and vesicular transport )		NOG125866(Auxin-induced protein)				PF00892.17(EamA:EamA-like transporter family)	GO:0003333(biological_process:amino acid transmembrane transport); GO:0032973(biological_process:amino acid export); GO:0080144(biological_process:amino acid homeostasis); GO:0043090(biological_process:amino acid import); GO:0005886(cellular_component:plasma membrane); GO:0015171(molecular_function:amino acid transmembrane transporter activity); GO:0016021(cellular_component:integral component of…	gi|902234864|gb|KNA23618.1|( hypothetical protein SOVF_023340 [Spinacia oleracea])	gi|460425444|sp|F4HZQ7.1|WTR5_ARATH(RecName: Full=WAT1-related protein At1g21890)
Phn-m0279-3p	TRINITY_DN92606_c1_g2	1.5	1	23	2659	2680	TTGGGACACATGTTAGAAAAACC	|:||||||||||:||||*|||||	AGCCCTGTGTACGATCT-TTTGG								PF07714.14(Pkinase_Tyr:Protein tyrosine kinase); PF00069.22(Pkinase:Protein kinase domain); PF13855.3(LRR_8:Leucine rich repeat); PF08263.9(LRRNT_2:Leucine rich repeat N-terminal domain)	GO:0016020(cellular_component:membrane)	gi|902198182|gb|KNA13613.1|( hypothetical protein SOVF_115070 [Spinacia oleracea])	gi|162416198|sp|Q06BH3.2|SRF1_ARATH(RecName: Full=Protein STRUBBELIG-RECEPTOR FAMILY 1; AltName: Full=Leucine-rich repeat receptor kinase-like protein SRF1; Flags: Precursor)
Phn-m0281-5p	TRINITY_DN90627_c3_g4	1.5	1	22	864	885	ATTCAGTCTAAAAGAACATGGT	*|||||||||||||||||*|::	AAAGTCAGATTTTCTTGTCCTG								PF01167.15(Tub:Tub family); PF00646.30(F-box:F-box domain); PF12937.4(F-box-like:F-box-like); PF12043.5(DUF3527:Domain of unknown function (DUF3527))	GO:0035091(molecular_function:phosphatidylinositol binding); GO:0005929(cellular_component:cilium); GO:0043231(cellular_component:intracellular membrane-bounded organelle); GO:0061512(biological_process:protein localization to cilium); GO:0044444(cellular_component:cytoplasmic part)	gi|731337357|ref|XP_010679743.1|( PREDICTED: tubby-like F-box protein 5 [Beta vulgaris subsp. vulgaris])	gi|75225297|sp|Q6Z2G9.1|TLP5_ORYSJ(RecName: Full=Tubby-like F-box protein 5; Short=OsTLP5; AltName: Full=Tubby-like F-box protein 8; Short=OsTLP8)
Phn-m0290-5p	TRINITY_DN86851_c1_g2	1.5	1	24	2051	2074	AGGAATTGTAATTCATGTGAATTA	*|:||||||||||||||||||||*	CCTTTAACATTAAGTACACTTAAC	COG0398(S:Function unknown )		COG0398(Snare associated golgi protein)					PF09335.8(SNARE_assoc:SNARE associated Golgi protein)	GO:0016021(cellular_component:integral component of membrane)	gi|731330121|ref|XP_010675956.1|( PREDICTED: transmembrane protein 41 homolog [Beta vulgaris subsp. vulgaris])	gi|2833469|sp|Q55909.1|Y305_SYNY3(RecName: Full=TVP38/TMEM64 family membrane protein slr0305)
Phn-m0301-3p	TRINITY_DN89591_c4_g1	1.5	1	22	1363	1384	CACGAGACACATAGCCAATGTG	||||||||||*:||||||||||	GTGCTCTGTGCGTCGGTTACAC					K05605	HIBCH	map00640(Propanoate metabolism); map00280(Valine, leucine and isoleucine degradation); map00410(beta-Alanine metabolism)	PF16113.2(ECH_2:Enoyl-CoA hydratase/isomerase); PF00378.17(ECH_1:Enoyl-CoA hydratase/isomerase)	GO:0003860(molecular_function:3-hydroxyisobutyryl-CoA hydrolase activity)	gi|1025327656|ref|XP_016505446.1|( PREDICTED: 3-hydroxyisobutyryl-CoA hydrolase-like protein 3, mitochondrial isoform X1 [Nicotiana tabacum])	gi|75273696|sp|Q9LK08.1|HIBC7_ARATH(RecName: Full=3-hydroxyisobutyryl-CoA hydrolase-like protein 4, mitochondrial; Flags: Precursor)
Phn-m0301-3p	TRINITY_DN89591_c4_g1	1.5	1	22	1046	1067	CACGAGACACATAGCCAATGTG	||||||||||*:||||||||||	GTGCTCTGTGCGTCGGTTACAC					K05605	HIBCH	map00640(Propanoate metabolism); map00280(Valine, leucine and isoleucine degradation); map00410(beta-Alanine metabolism)	PF16113.2(ECH_2:Enoyl-CoA hydratase/isomerase); PF00378.17(ECH_1:Enoyl-CoA hydratase/isomerase)	GO:0003860(molecular_function:3-hydroxyisobutyryl-CoA hydrolase activity)	gi|1025327656|ref|XP_016505446.1|( PREDICTED: 3-hydroxyisobutyryl-CoA hydrolase-like protein 3, mitochondrial isoform X1 [Nicotiana tabacum])	gi|75273696|sp|Q9LK08.1|HIBC7_ARATH(RecName: Full=3-hydroxyisobutyryl-CoA hydrolase-like protein 4, mitochondrial; Flags: Precursor)
Phn-m0301-3p	TRINITY_DN90132_c2_g1	1.5	1	22	1052	1073	CACGAGACACATAGCCAATGTG	|||||||||||:|*||||||||	GTGCTCTGTGTGTAGGTTACAC										gi|595883029|ref|XP_007212713.1|( hypothetical protein PRUPE_ppa018760mg, partial [Prunus persica])	gi|75247593|sp|Q8RWD6.1|FB271_ARATH(RecName: Full=F-box protein At5g39450)
Phn-m0301-3p	TRINITY_DN91605_c3_g1	1.5	1	22	1006	1027	CACGAGACACATAGCCAATGTG	||||||||||*|||||||*|||	GTGCTCTGTGCATCGGTTTCAC		NOG56297(R:General function prediction only )		NOG56297(Thioesterase superfamily)				PF13279.3(4HBT_2:Thioesterase-like superfamily); PF03061.19(4HBT:Thioesterase superfamily)		gi|731340600|ref|XP_010681488.1|( PREDICTED: uncharacterized protein LOC104896436 [Beta vulgaris subsp. vulgaris])	gi|75162589|sp|Q8W583.1|ALT3_ARATH(RecName: Full=Acyl-acyl carrier protein thioesterase ATL3, chloroplastic; AltName: Full=Acyl-ACP thioesterase ATL3; AltName: Full=Acyl-lipid thioesterase 3; Flags: Precursor)
Phn-m0011-3p	TRINITY_DN88419_c0_g1	1.8	1	22	939	960	ACGTAAACAACATGATATATCG	||:||||||||||||||*||*:	TGTATTTGTTGTACTATCTATT		NOG49011(O:Posttranslational modification, protein turnover, chaperones )		NOG49011(biogenesis of lysosome-related organelles complex 1 subunit)	K20185	BLOC1S1		PF06320.10(GCN5L1:GCN5-like protein 1 (GCN5L1))	GO:0031083(cellular_component:BLOC-1 complex)	gi|870853557|gb|KMT05438.1|( hypothetical protein BVRB_7g175650 [Beta vulgaris subsp. vulgaris])	gi|3024583|sp|O22929.1|BL1S1_ARATH(RecName: Full=Biogenesis of lysosome-related organelles complex 1 subunit 1; Short=BLOC-1 subunit 1; AltName: Full=GCN5-like protein 1; AltName: Full=Protein RT14 homolog)
Phn-m0011-3p	TRINITY_DN89633_c0_g2	1.8	1	22	907	927	ACGTAAACAACATGATATATCG	|||||||*|||||||||||*|:	TGCATTTCTTGTACTATAT-GT								PF08879.7(WRC:WRC); PF08880.8(QLQ:QLQ)	GO:0006355(biological_process:regulation of transcription, DNA-templated); GO:0005524(molecular_function:ATP binding); GO:0032502(biological_process:developmental process); GO:0005634(cellular_component:nucleus)	gi|731372159|ref|XP_010666262.1|( PREDICTED: growth-regulating factor 1 [Beta vulgaris subsp. vulgaris])	gi|75154316|sp|Q8L8A6.1|GRF5_ARATH(RecName: Full=Growth-regulating factor 5; Short=AtGRF5; AltName: Full=Transcription activator GRF5)
Phn-m0011-3p	TRINITY_DN90855_c6_g6	1.8	1	22	1062	1083	ACGTAAACAACATGATATATCG	|*|||||||||||||||:*|||	TACATTTGTTGTACTATGAAGC								PF14543.3(TAXi_N:Xylanase inhibitor N-terminal); PF00026.20(Asp:Eukaryotic aspartyl protease)		gi|731319852|ref|XP_010670495.1|( PREDICTED: protein ASPARTIC PROTEASE IN GUARD CELL 2 [Beta vulgaris subsp. vulgaris])	gi|75097043|sp|O04496.1|AED3_ARATH(RecName: Full=Aspartyl protease AED3; AltName: Full=Apoplastic EDS1-dependent protein 3; Flags: Precursor)
Phn-m0013-3p	TRINITY_DN80742_c0_g2	1.8	1	22	785	806	ACGTAAACAAATGACTGGAACG	|||||||||||:|||*|||||:	TGCATTTGTTTGCTGCCCTTGT								PF00314.14(Thaumatin:Thaumatin family); PF02422.13(Keratin:Keratin)		gi|731331155|ref|XP_010676513.1|( PREDICTED: protein P21-like [Beta vulgaris subsp. vulgaris])	gi|190358875|sp|P81370.2|TLP_ACTDE(RecName: Full=Thaumatin-like protein; AltName: Allergen=Act d 2; Flags: Precursor)
Phn-m0019-3p	TRINITY_DN87874_c1_g2	1.8	1	24	241	264	AGGGTGATATCGAGACTCGGTACC	*||||||||||:|||||||:||*|	ACCCACTATAGTTCTGAGCTATAG		NOG156473(S:Function unknown )		NOG156473(Hypoxia induced protein conserved region)				PF04588.10(HIG_1_N:Hypoxia induced protein conserved region)	GO:0033617(biological_process:mitochondrial respiratory chain complex IV assembly); GO:0097249(cellular_component:mitochondrial respiratory chain supercomplex); GO:0031305(cellular_component:integral component of mitochondrial inner membrane)	gi|225448613|ref|XP_002278922.1|( PREDICTED: uncharacterized protein LOC100267335 [Vitis vinifera])	gi|74624934|sp|Q9P3B2.1|RCF2_SCHPO(RecName: Full=Respiratory supercomplex factor 2 homolog C1565.01)
Phn-m0023-3p	TRINITY_DN91984_c3_g5	1.8	1	24	493	516	GTTCTCATGTAAGATTTACTTATC	|||||||||:||||||||||:*|*	CAAGAGTACGTTCTAAATGAGAAA								PF14547.3(Hydrophob_seed:Hydrophobic seed protein); PF00234.19(Tryp_alpha_amyl:Protease inhibitor/seed storage/LTP family)		gi|731316680|ref|XP_010696470.1|( PREDICTED: 14 kDa proline-rich protein DC2.15-like [Beta vulgaris subsp. vulgaris])	gi|75207810|sp|Q9SU33.1|ERLL3_ARATH(RecName: Full=pEARLI1-like lipid transfer protein 3; Flags: Precursor)
Phn-m0024-3p	TRINITY_DN88918_c5_g1	1.8	1	21	245	265	TTTTGAACAATGTATACAACT	*||||||*||||||||||||:	CAAACTTTTTACATATGTTGG									GO:0008536(molecular_function:Ran GTPase binding); GO:0005622(cellular_component:intracellular); GO:0006886(biological_process:intracellular protein transport)	gi|731331669|ref|XP_010676781.1|( PREDICTED: importin-11 isoform X2 [Beta vulgaris subsp. vulgaris])	gi|50401062|sp|Q8K2V6.1|IPO11_MOUSE(RecName: Full=Importin-11; Short=Imp11; AltName: Full=Ran-binding protein 11; Short=RanBP11)
Phn-m0024-3p	TRINITY_DN88918_c5_g1	1.8	1	21	218	238	TTTTGAACAATGTATACAACT	*||||||*||||||||||||:	CAAACTTTTTACATATGTTGG									GO:0008536(molecular_function:Ran GTPase binding); GO:0005622(cellular_component:intracellular); GO:0006886(biological_process:intracellular protein transport)	gi|731331669|ref|XP_010676781.1|( PREDICTED: importin-11 isoform X2 [Beta vulgaris subsp. vulgaris])	gi|50401062|sp|Q8K2V6.1|IPO11_MOUSE(RecName: Full=Importin-11; Short=Imp11; AltName: Full=Ran-binding protein 11; Short=RanBP11)
Phn-m0036-5p	TRINITY_DN88943_c2_g2	1.8	1	23	181	203	ATGGACTGGATCTGGATTGGATC	|||||||||||||||||:**||*	TACCTGACCTAGACCTAGGATAT										gi|731349741|ref|XP_010686153.1|( PREDICTED: LOW QUALITY PROTEIN: ABC transporter G family member 31 [Beta vulgaris subsp. vulgaris])	gi|75249332|sp|Q93X17.1|SNAK2_SOLTU(RecName: Full=Snakin-2; Flags: Precursor)
Phn-m0049-5p	TRINITY_DN92505_c0_g1	1.8	1	24	2600	2623	ATCCGTTGGATATGGACTGGATCT	||||:|||:||||||||||:|*||	TAGGTAACTTATACCTGACTTTGA										gi|902229486|gb|KNA21523.1|( hypothetical protein SOVF_041910 [Spinacia oleracea])	gi|75102139|sp|Q39846.1|SBP65_SOYBN(RecName: Full=Seed biotin-containing protein SBP65; AltName: Full=BP75; AltName: Full=Seed biotinylated protein of 65 kDa)
Phn-m0069-3p	TRINITY_DN86382_c0_g1	1.8	1	23	137	159	AAACAACCTGATGTATCGGAGGG	||||||*||:||||||||||:||	TTTGTTAGATTACATAGCCTTCC								PF05705.11(DUF829:Eukaryotic protein of unknown function (DUF829))		gi|902203607|gb|KNA14614.1|( hypothetical protein SOVF_105800 [Spinacia oleracea])	gi|74758243|sp|Q6P2H8.1|TMM53_HUMAN(RecName: Full=Transmembrane protein 53)
Phn-m0069-3p	TRINITY_DN87211_c2_g1	1.8	1	23	30	52	AAACAACCTGATGTATCGGAGGG	||||||||||||||||*||*|:|	TTTGTTGGACTACATATCCCCTC					K09422	MYBP				gi|731320847|ref|XP_010671030.1|( PREDICTED: myb-related protein Myb4-like [Beta vulgaris subsp. vulgaris])	gi|73921025|sp|Q7XBH4.2|MYB4_ORYSJ(RecName: Full=Myb-related protein Myb4; AltName: Full=OsMyb4; AltName: Full=Transcription factor RLTR1)
Phn-m0069-3p	TRINITY_DN87390_c2_g1	1.8	1	23	477	498	AAACAACCTGATGTATCGGAGGG	||||||||||||:||||*:|*||	TTTGTTGGACTATATAG-TTGCC	COG0515(T:Signal transduction mechanisms )		COG0515(Serine Threonine protein kinase)		K04733	IRAK4		PF07714.14(Pkinase_Tyr:Protein tyrosine kinase); PF00069.22(Pkinase:Protein kinase domain)	GO:0006468(biological_process:protein phosphorylation); GO:0005524(molecular_function:ATP binding); GO:0016021(cellular_component:integral component of membrane); GO:0004674(molecular_function:protein serine/threonine kinase activity)	gi|902220287|gb|KNA18563.1|( hypothetical protein SOVF_069630 isoform B [Spinacia oleracea])	gi|122242302|sp|Q0V7T5.1|Y1864_ARATH(RecName: Full=Probable receptor-like protein kinase At1g80640; Flags: Precursor)
Phn-m0069-3p	TRINITY_DN89390_c1_g2	1.8	1	23	1133	1155	AAACAACCTGATGTATCGGAGGG	||||||||:|||||||*|:||||	TTTGTTGGGCTACATATCTTCCC					K03456	PPP2R1	map03015(mRNA surveillance pathway)	PF02985.19(HEAT:HEAT repeat); PF13646.3(HEAT_2:HEAT repeats)		gi|902213544|gb|KNA17283.1|( hypothetical protein SOVF_081220 [Spinacia oleracea])	gi|83287930|sp|Q38950.2|2AAB_ARATH(RecName: Full=Serine/threonine-protein phosphatase 2A 65 kDa regulatory subunit A beta isoform; Short=AtA beta; Short=PP2A, subunit A, beta isoform)
Phn-m0069-3p	TRINITY_DN89509_c1_g2	1.8	1	23	1597	1619	AAACAACCTGATGTATCGGAGGG	||||||*||||||||||||||*:	TTTGTTAGACTACATAGCCTCAT	COG0515(T:Signal transduction mechanisms )		COG0515(Serine Threonine protein kinase)		K04733	IRAK4		PF07714.14(Pkinase_Tyr:Protein tyrosine kinase); PF00069.22(Pkinase:Protein kinase domain)	GO:0005886(cellular_component:plasma membrane); GO:0006468(biological_process:protein phosphorylation); GO:0005524(molecular_function:ATP binding); GO:0004674(molecular_function:protein serine/threonine kinase activity)	gi|731350514|ref|XP_010686542.1|( PREDICTED: putative serine/threonine-protein kinase [Beta vulgaris subsp. vulgaris])	gi|313471762|sp|C0LGN2.1|Y3148_ARATH(RecName: Full=Probable leucine-rich repeat receptor-like serine/threonine-protein kinase At3g14840; Flags: Precursor)
Phn-m0069-3p	TRINITY_DN90880_c0_g3	1.8	1	23	722	744	AAACAACCTGATGTATCGGAGGG	||||||||||||||||**|||:|	TTTGTTGGACTACATAAACTCTC					K10579	UBE2M, UBC12	map04120(Ubiquitin mediated proteolysis)		GO:0016021(cellular_component:integral component of membrane); GO:0005524(molecular_function:ATP binding)	gi|902229708|gb|KNA21581.1|( hypothetical protein SOVF_041850 [Spinacia oleracea])	gi|75313330|sp|Q9SDY5.1|RCE1_ARATH(RecName: Full=NEDD8-conjugating enzyme Ubc12; AltName: Full=RUB1 carrier protein 1; AltName: Full=RUB1-conjugating enzyme 1; AltName: Full=RUB1-protein ligase 1)
Phn-m0069-3p	TRINITY_DN92053_c4_g1	1.8	1	23	2259	2282	AAACAACCTGATGTATCG-GAGGG	||||||||||||||||||*|**:|	TTTGTTGGACTACATAGCACAATC								PF03514.11(GRAS:GRAS domain family)	GO:0006355(biological_process:regulation of transcription, DNA-templated)	gi|902231285|gb|KNA22199.1|( hypothetical protein SOVF_036000 [Spinacia oleracea])	gi|75173299|sp|Q9FYR7.1|SCL8_ARATH(RecName: Full=Scarecrow-like protein 8; Short=AtSCL8; AltName: Full=GRAS family protein 30; Short=AtGRAS-30)
Phn-m0074-5p	TRINITY_DN89142_c2_g2	1.8	1	24	653	676	AGGATCGGGATTCTACTTTGGATC	|||||*|:|||||||||:||||||	TCCTAACTCTAAGATGAGACCTAG								PF03169.12(OPT:OPT oligopeptide transporter protein)	GO:0055085(biological_process:transmembrane transport); GO:0016021(cellular_component:integral component of membrane)	gi|902201791|gb|KNA14079.1|( hypothetical protein SOVF_110770 [Spinacia oleracea])	gi|67460721|sp|O82485.1|OPT7_ARATH(RecName: Full=Oligopeptide transporter 7; Short=AtOPT7)
Phn-m0074-5p	TRINITY_DN89144_c1_g2	1.8	1	24	304	327	AGGATCGGGATTCTACTTTGGATC	|||||*|:||||||||||||:|||	TCCTAACTCTAAGATGAAACTTAG		NOG04508(R:General function prediction only )		NOG04508(ddb1 and cul4 associated factor)	K11804	WDR42A		PF00400.29(WD40:WD domain, G-beta repeat)		gi|731357627|ref|XP_010690312.1|( PREDICTED: DDB1- and CUL4-associated factor 8 isoform X1 [Beta vulgaris subsp. vulgaris])	gi|81914814|sp|Q8N7N5.1|DCAF8_MOUSE(RecName: Full=DDB1- and CUL4-associated factor 8; AltName: Full=WD repeat-containing protein 42A)
Phn-m0078-5p	TRINITY_DN85860_c0_g1	1.8	1	24	3091	3114	ATTTCCGGTCAAAGTTTTTCAACT	||*||||:||||||||||:|||||	TACAGGCTAGTTTCAAAAGGTTGA								PF07690.13(MFS_1:Major Facilitator Superfamily)	GO:0055085(biological_process:transmembrane transport); GO:0016021(cellular_component:integral component of membrane); GO:0005215(molecular_function:transporter activity)	gi|870856824|gb|KMT08413.1|( hypothetical protein BVRB_6g140900 [Beta vulgaris subsp. vulgaris])	gi|408360265|sp|Q8CIA9.3|MF14B_MOUSE(RecName: Full=Hippocampus abundant transcript-like protein 1; AltName: Full=Major facilitator superfamily domain-containing 14B)
Phn-m0082-3p	TRINITY_DN88126_c1_g5	1.8	1	22	29	50	AACGTGAACAATCTGATGTATC	|||||:|||||:||:||:||||	TTGCATTTGTTGGATTATATAG					K09287	RAV				gi|902222130|gb|KNA19098.1|( hypothetical protein SOVF_064760 [Spinacia oleracea])	gi|75268209|sp|Q9C6P5.1|RAVL2_ARATH(RecName: Full=AP2/ERF and B3 domain-containing transcription factor At1g50680; AltName: Full=RAV1-like ethylene-responsive transcription factor At1g50680)
Phn-m0082-3p	TRINITY_DN90150_c1_g2	1.8	1	22	2138	2159	AACGTGAACAATCTGATGTATC	|||||:|||||:||:||:||||	TTGCATTTGTTGGATTATATAG					K14545	RRP7	map03008(Ribosome biogenesis in eukaryotes)	PF12923.4(RRP7:Ribosomal RNA-processing protein 7 (RRP7))		gi|902188678|gb|KNA11211.1|( hypothetical protein SOVF_137280 isoform A [Spinacia oleracea])	gi|66773938|sp|Q9D1C9.1|RRP7A_MOUSE(RecName: Full=Ribosomal RNA-processing protein 7 homolog A; AltName: Full=Gastric cancer antigen Zg14 homolog)
Phn-m0082-3p	TRINITY_DN90759_c4_g6	1.8	1	22	2501	2522	AACGTGAACAATCTGATGTATC	|||||:|||||:||:||:||||	TTGCATTTGTTGGATTATATAG								PF02704.11(GASA:Gibberellin regulated protein); PF07727.11(RVT_2:Reverse transcriptase (RNA-dependent DNA polymerase))		gi|802550613|ref|XP_012093075.1|( PREDICTED: snakin-1 [Jatropha curcas])	gi|75164757|sp|Q948Z4.1|SNAK1_SOLTU(RecName: Full=Snakin-1; Flags: Precursor)
Phn-m0087-5p	TRINITY_DN86113_c1_g1	1.8	1	22	797	818	TAAGGCCATGTTCTTTTGGACT	|*||||||||||||||||:||*	AATCCGGTACAAGAAAACTTGC								PF13962.3(PGG:Domain of unknown function); PF12796.4(Ank_2:Ankyrin repeats (3 copies)); PF13857.3(Ank_5:Ankyrin repeats (many copies)); PF00023.27(Ank:Ankyrin repeat)		gi|731337963|ref|XP_010680067.1|( PREDICTED: ankyrin repeat-containing protein At3g12360-like [Beta vulgaris subsp. vulgaris])	gi|75315914|sp|Q9ZU96.1|Y2168_ARATH(RecName: Full=Ankyrin repeat-containing protein At2g01680)
Phn-m0087-5p	TRINITY_DN86557_c4_g1	1.8	1	22	1184	1205	TAAGGCCATGTTCTTTTGGACT	|||||||*|:||||||||:|||	ATTCCGGGATAAGAAAACTTGA								PF13041.3(PPR_2:PPR repeat family); PF12854.4(PPR_1:PPR repeat); PF01535.17(PPR:PPR repeat); PF13812.3(PPR_3:Pentatricopeptide repeat domain); PF17177.1(PPR_long:Pentacotripeptide-repeat region of PROPR); PF17049.2(AEP1:ATPase expression protein 1); PF14559.3(TPR_19:Tetratricopeptide repeat)		gi|731311501|ref|XP_010669817.1|( PREDICTED: pentatricopeptide repeat-containing protein At3g61520, mitochondrial [Beta vulgaris subsp. vulgaris])	gi|75183498|sp|Q9M316.1|PP292_ARATH(RecName: Full=Pentatricopeptide repeat-containing protein At3g61520, mitochondrial; Flags: Precursor)
Phn-m0087-5p	TRINITY_DN86576_c2_g5	1.8	1	22	3126	3147	TAAGGCCATGTTCTTTTGGACT	|||||||*|||||||||:||*|	ATTCCGGGACAAGAAAATCTCA	COG5126(Z:Cytoskeleton); COG5126(T:Signal transduction mechanisms); COG5126(D:Cell cycle control, cell division, chromosome partitioning)		COG5126(myosin light chain); COG5126(myosin light chain); COG5126(myosin light chain)		K02183	CALM	map04070(Phosphatidylinositol signaling system); map04016(MAPK signaling pathway - plant); map04626(Plant-pathogen interaction)	PF00036.29(EF-hand_1:EF hand); PF13833.3(EF-hand_8:EF-hand domain pair); PF13499.3(EF-hand_7:EF-hand domain pair); PF13405.3(EF-hand_6:EF-hand domain); PF13202.3(EF-hand_5:EF hand); PF14658.3(EF-hand_9:EF-hand domain); PF12763.4(EF-hand_4:Cytoskeletal-regulatory complex EF hand); PF08976.8(EF-hand_11:EF-hand domain); PF10591.6(SPARC_Ca_bdg:Secreted protein acidic and rich in cysteine Ca binding r…	GO:0005509(molecular_function:calcium ion binding)	gi|475535613|gb|EMT08774.1|( Calmodulin [Aegilops tauschii])	gi|27805429|sp|P59220.2|CALM7_ARATH(RecName: Full=Calmodulin-7; Short=CaM-7 >gi|49037479|sp|P62199.2|CALM1_PETHY RecName: Full=Calmodulin-1; Short=CaM-1 >gi|49037480|sp|P62200.2|CALM1_DAUCA RecName: Full=Calmodulin-1/11/16; Short=CaM-1/11/16 >gi|49037481|sp|P62201.2|CALM_LILLO RecName: Full=Calmodulin; Short=CaM >gi|49037482|sp|P62202.2|CALM_BRYDI RecName: Full=Calmodulin; Short=CaM; AltName: Ful…
Phn-m0087-5p	TRINITY_DN87736_c6_g2	1.8	1	22	2626	2648	TAAGGCCATGTTCTTTTG-GACT	:|||:|||||||||||||*|*||	GTTCTGGTACAAGAAAACTCAGA	COG2133(G:Carbohydrate transport and metabolism )		COG2133(Dehydrogenase)					PF07995.8(GSDH:Glucose / Sorbosone dehydrogenase)	GO:0016901(molecular_function:oxidoreductase activity, acting on the CH-OH group of donors, quinone or similar compound as acceptor); GO:0055114(biological_process:oxidation-reduction process); GO:0005975(biological_process:carbohydrate metabolic process); GO:0048038(molecular_function:quinone binding)	gi|902207025|gb|KNA15602.1|( hypothetical protein SOVF_096770 [Spinacia oleracea])	gi|34395733|sp|Q9SSG3.2|HIPL1_ARATH(RecName: Full=HIPL1 protein; Flags: Precursor)
Phn-m0087-5p	TRINITY_DN88846_c4_g1	1.8	1	22	790	811	TAAGGCCATGTTCTTTTGGACT	:||||||*:|||||||||||||	GTTCCGGGGCAAGAAAACCTGA								PF00400.29(WD40:WD domain, G-beta repeat); PF12894.4(ANAPC4_WD40:Anaphase-promoting complex subunit 4 WD40 domain)		gi|731346355|ref|XP_010684410.1|( PREDICTED: autophagy-related protein 18a [Beta vulgaris subsp. vulgaris])	gi|75331631|sp|Q93VB2.1|AT18A_ARATH(RecName: Full=Autophagy-related protein 18a; Short=AtATG18a; AltName: Full=Protein PEROXISOME UNUSUAL POSITIONING 2)
Phn-m0087-5p	TRINITY_DN89060_c0_g2	1.8	1	22	382	403	TAAGGCCATGTTCTTTTGGACT	|||||||*:|||||||||:|||	ATTCCGGGGCAAGAAAACTTGA					K01535	PMA1, PMA2	map00190(Oxidative phosphorylation)		GO:0008553(molecular_function:hydrogen-exporting ATPase activity, phosphorylative mechanism); GO:0046872(molecular_function:metal ion binding); GO:0006754(biological_process:ATP biosynthetic process); GO:0016021(cellular_component:integral component of membrane); GO:1902600(biological_process:hydrogen ion transmembrane transport); GO:0005524(molecular_function:ATP binding)	gi|743809639|ref|XP_010928676.1|( PREDICTED: plasma membrane ATPase-like [Elaeis guineensis])	gi|416664|sp|Q03194.1|PMA4_NICPL(RecName: Full=Plasma membrane ATPase 4; AltName: Full=Proton pump 4)
Phn-m0087-5p	TRINITY_DN90270_c2_g4	1.8	1	22	3343	3363	TAAGGCCATGTTCTTTTGGACT	||||||||||||||||*|:|*|	ATTCCGGTACAAGAAA-CTTTA					K01942	HLCS	map00780(Biotin metabolism)	PF03099.16(BPL_LplA_LipB:Biotin/lipoate A/B protein ligase family)	GO:0006464(biological_process:cellular protein modification process); GO:0004077(molecular_function:biotin-[acetyl-CoA-carboxylase] ligase activity)	gi|700202909|gb|KGN58042.1|( hypothetical protein Csa_3G455650 [Cucumis sativus])	gi|614084158|sp|F4I4W2.1|HCS2_ARATH(RecName: Full=Biotin--protein ligase 2; AltName: Full=Holocarboxylase synthetase 2)
Phn-m0087-5p	TRINITY_DN91029_c3_g1	1.8	1	22	4266	4287	TAAGGCCATGTTCTTTTGGACT	||||:||*|||||||||:||||	ATTCTGGGACAAGAAAATCTGA								PF07173.9(DUF1399:Protein of unknown function (DUF1399))		gi|731343766|ref|XP_010683055.1|( PREDICTED: uncharacterized protein LOC104897807 [Beta vulgaris subsp. vulgaris])	gi|75213614|sp|Q9SZJ2.1|GRDP2_ARATH(RecName: Full=Glycine-rich domain-containing protein 2; Short=AtGRDP2)
Phn-m0087-5p	TRINITY_DN92018_c0_g3	1.8	1	22	603	624	TAAGGCCATGTTCTTTTGGACT	|||||||*||||||||::||||	ATTCCGGGACAAGAAAGTCTGA								PF04545.13(Sigma70_r4:Sigma-70, region 4); PF08281.9(Sigma70_r4_2:Sigma-70, region 4)	GO:0006355(biological_process:regulation of transcription, DNA-templated); GO:0003700(molecular_function:transcription factor activity, sequence-specific DNA binding); GO:0003677(molecular_function:DNA binding); GO:0006352(biological_process:DNA-templated transcription, initiation); GO:0016987(molecular_function:sigma factor activity)	gi|902128483|gb|KNA04193.1|( hypothetical protein SOVF_201930 [Spinacia oleracea])	gi|75173811|sp|Q9LD95.1|SIGF_ARATH(RecName: Full=RNA polymerase sigma factor sigF, chloroplastic; Short=Sigma factor F; Short=Sigma-F; AltName: Full=Protein SINGLET OXYGEN-LINKED DEATH ACTIVATOR 8; AltName: Full=RNA polymerase sigma factor sig6; Short=Atsig6; Short=Sigma factor 6; Flags: Precursor)
Phn-m0087-5p	TRINITY_DN92344_c2_g3	1.8	1	22	3432	3453	TAAGGCCATGTTCTTTTGGACT	|||||*|||:||||||||:|||	ATTCCAGTATAAGAAAACTTGA										gi|731324270|ref|XP_010672882.1|( PREDICTED: uncharacterized protein At5g39570 isoform X1 [Beta vulgaris subsp. vulgaris])	gi|75171219|sp|Q9FKA5.1|Y5957_ARATH(RecName: Full=Uncharacterized protein At5g39570)
Phn-m0089-5p	TRINITY_DN85517_c1_g1	1.8	1	23	150	171	TCACTTTATAAACTAAGGGGACT	:|*|||||||||||||||||*||	GGAGAAATATTTGATTCCCC-GA					K14066	GPS	map00900(Terpenoid backbone biosynthesis)	PF00348.14(polyprenyl_synt:Polyprenyl synthetase); PF04736.9(Eclosion:Eclosion hormone)	GO:0008299(biological_process:isoprenoid biosynthetic process); GO:0016740(molecular_function:transferase activity)	gi|731311696|ref|XP_010670605.1|( PREDICTED: solanesyl diphosphate synthase 3, chloroplastic/mitochondrial isoform X3 [Beta vulgaris subsp. vulgaris])	gi|75222435|sp|Q5HZ00.1|SPS3_ARATH(RecName: Full=Solanesyl diphosphate synthase 3, chloroplastic/mitochondrial; AltName: Full=All-trans-nonaprenyl-diphosphate synthase 3 (geranylgeranyl-diphosphate specific); AltName: Full=Geranyl diphosphate synthase 1; AltName: Full=Trans-type polyprenyl pyrophosphate synthase; Short=AtPPPS; Flags: Precursor)
Phn-m0089-5p	TRINITY_DN93126_c3_g1	1.8	1	23	1910	1931	TCACTTTATAAACTAAGGGGACT	:|*|||||||||||||||||*||	GGAGAAATATTTGATTCCCC-GA					K14066	GPS	map00900(Terpenoid backbone biosynthesis)	PF00348.14(polyprenyl_synt:Polyprenyl synthetase)	GO:0016740(molecular_function:transferase activity)	gi|902169073|gb|KNA07599.1|( hypothetical protein SOVF_170370 [Spinacia oleracea])	gi|75253263|sp|Q653T6.1|SPS1_ORYSJ(RecName: Full=Solanesyl-diphosphate synthase 1, mitochondrial; Short=OsSPS1; AltName: Full=All-trans-nonaprenyl-diphosphate synthase 1 (geranyl-diphosphate specific); Flags: Precursor)
Phn-m0101-5p	TRINITY_DN86364_c9_g3	1.8	1	23	2238	2260	TGAAACCGTTGTATGCATACAAG	|:||||||||:||||||||||*:	ATTTTGGCAATATACGTATGTGT	COG3491(R:General function prediction only )		COG3491(2OGFe(II) oxygenase)					PF14226.3(DIOX_N:non-haem dioxygenase in morphine synthesis N-terminal); PF03171.17(2OG-FeII_Oxy:2OG-Fe(II) oxygenase superfamily)	GO:0016491(molecular_function:oxidoreductase activity); GO:0055114(biological_process:oxidation-reduction process); GO:0005506(molecular_function:iron ion binding)	gi|731353929|ref|XP_010688314.1|( PREDICTED: probable 2-oxoglutarate-dependent dioxygenase At3g49630 isoform X1 [Beta vulgaris subsp. vulgaris])	gi|75297895|sp|Q84MB6.1|DIOX2_ARATH(RecName: Full=Probable 2-oxoglutarate-dependent dioxygenase At3g49630)
Phn-m0101-5p	TRINITY_DN88854_c2_g1	1.8	1	23	1825	1848	TGAAACCGTTGTATGCATACAA-G	|||||||:|||||||||:|*||*|	ACTTTGGTAACATACGTGTATTGC					K07252	E3.6.1.43	map00510(N-Glycan biosynthesis)		GO:0016021(cellular_component:integral component of membrane)	gi|731337405|ref|XP_010679769.1|( PREDICTED: lipid phosphate phosphatase epsilon 1, chloroplastic isoform X2 [Beta vulgaris subsp. vulgaris])	gi|586908181|sp|F4J220.1|LPPE1_ARATH(RecName: Full=Lipid phosphate phosphatase epsilon 1, chloroplastic; Short=AtLPPE1; AltName: Full=Phosphatidic acid phosphatase epsilon 1; AltName: Full=Plastidic phosphatidic acid phosphatase epsilon 1; Flags: Precursor)
Phn-m0101-5p	TRINITY_DN91761_c1_g4	1.8	1	23	3202	3223	TGAAACCGTTGTATGCATACAAG	|||*|||||||||||||||*||:	ACTCTGGCAACATACGTAT-TTT								PF03004.11(Transposase_24:Plant transposase (Ptta/En/Spm family))		gi|731358013|ref|XP_010690514.1|( PREDICTED: uncharacterized protein LOC104904039 [Beta vulgaris subsp. vulgaris])	gi|75214681|sp|Q9XEC1.1|Y4443_ARATH(RecName: Full=Probable transposase-like protein At4g04430)
Phn-m0101-5p	TRINITY_DN93077_c0_g1	1.8	1	23	2184	2206	TGAAACCGTTGTATGCATACAAG	||||*|||||:|||||||||||:	ACTTGGGCAATATACGTATGTTT	COG0197(J:Translation, ribosomal structure and biogenesis )		COG0197(Binds 23S rRNA and is also seen to make contacts with the A and possibly P site tRNAs (By similarity))		K02878	RP-L16, MRPL16, rplP	map03010(Ribosome)	PF00410.16(Ribosomal_S8:Ribosomal protein S8); PF00238.16(Ribosomal_L14:Ribosomal protein L14p/L23e); PF00189.17(Ribosomal_S3_C:Ribosomal protein S3, C-terminal domain); PF00411.16(Ribosomal_S11:Ribosomal protein S11); PF00252.15(Ribosomal_L16:Ribosomal protein L16p/L10e); PF00076.19(RRM_1:RNA recognition motif. (a.k.a. RRM, RBD, or RNP domain))	GO:0005840(cellular_component:ribosome); GO:0003735(molecular_function:structural constituent of ribosome); GO:0009507(cellular_component:chloroplast); GO:0006412(biological_process:translation); GO:0019843(molecular_function:rRNA binding)	gi|576303651|ref|YP_008999969.1|( ribosomal protein S8 (chloroplast) (chloroplast) [Agrostemma githago])	gi|146335783|sp|Q49KW3.1|RR8_EUCGG(RecName: Full=30S ribosomal protein S8, chloroplastic)
Phn-m0101-5p	TRINITY_DN93261_c2_g4	1.8	1	23	1303	1325	TGAAACCGTTGTATGCATACAAG	|||*|||||||||||||:||||*	ACTCTGGCAACATACGTGTGTTA		NOG01032(S:Function unknown )		NOG01032(Chromosome 12 open reading frame 44)	K19730	ATG101		PF07855.9(DUF1649:Protein of unknown function (DUF1649))		gi|902206620|gb|KNA15515.1|( hypothetical protein SOVF_097610 isoform B [Spinacia oleracea])	gi|952543416|sp|F4K265.1|AT101_ARATH(RecName: Full=Autophagy-related protein 101)
Phn-m0106-5p	TRINITY_DN79883_c0_g3	1.8	1	22	18	39	GGGAATATTGTTTTAATGGATG	|:|||||||:|||||||*||:|	CTCTTATAATAAAATTAACTGC								PF01429.16(MBD:Methyl-CpG binding domain)	GO:0005634(cellular_component:nucleus); GO:0003677(molecular_function:DNA binding)	gi|731363622|ref|XP_010693525.1|( PREDICTED: uncharacterized protein LOC104906467 [Beta vulgaris subsp. vulgaris])	gi|75180473|sp|Q9LTJ8.1|MBD13_ARATH(RecName: Full=Methyl-CpG-binding domain-containing protein 13; Short=AtMBD13; Short=MBD13; AltName: Full=Methyl-CpG-binding protein MBD13)
Phn-m0106-5p	TRINITY_DN86037_c1_g4	1.8	1	22	383	404	GGGAATATTGTTTTAATGGATG	::|||||||:||||||||*|||	TTCTTATAATAAAATTACATAC								PF07727.11(RVT_2:Reverse transcriptase (RNA-dependent DNA polymerase))		gi|731317712|ref|XP_010669333.1|( PREDICTED: copia protein isoform X1 [Beta vulgaris subsp. vulgaris])	gi|45477041|sp|P92519.1|M810_ARATH(RecName: Full=Uncharacterized mitochondrial protein AtMg00810; AltName: Full=ORF240b)
Phn-m0106-5p	TRINITY_DN86634_c6_g2	1.8	1	22	1255	1277	GGGAATATTGTTTTAATG-GATG	|||||||||:|||||||:**|||	CCCTTATAATAAAATTATGGTAC					K21026	AAE	map00901(Indole alkaloid biosynthesis)	PF00657.19(Lipase_GDSL:GDSL-like Lipase/Acylhydrolase)	GO:0016788(molecular_function:hydrolase activity, acting on ester bonds)	gi|731344648|ref|XP_010683532.1|( PREDICTED: acetylajmalan esterase-like [Beta vulgaris subsp. vulgaris])	gi|122216888|sp|Q3MKY2.1|AAE_RAUSE(RecName: Full=Acetylajmalan esterase; Flags: Precursor)
Phn-m0106-5p	TRINITY_DN87816_c6_g1	1.8	1	22	2175	2196	GGGAATATTGTTTTAATGGATG	||||||||*:||||||||:|||	CCCTTATATTAAAATTACTTAC					K12624	LSM5	map03018(RNA degradation); map03040(Spliceosome)			gi|731361973|ref|XP_010692646.1|( PREDICTED: LOW QUALITY PROTEIN: U6 snRNA-associated Sm-like protein LSm5 [Beta vulgaris subsp. vulgaris])	gi|75262597|sp|Q9FKB0.1|LSM5_ARATH(RecName: Full=Sm-like protein LSM5; Short=AtLSM5; AltName: Full=Protein SUPERSENSITIVE TO ABA AND DROUGHT 1; Short=AtSAD1; AltName: Full=U6 snRNA-associated Sm-like protein LSM5)
Phn-m0106-5p	TRINITY_DN88646_c0_g1	1.8	1	22	1270	1291	GGGAATATTGTTTTAATGGATG	|:|||:|||:|||||||:||||	CTCTTGTAATAAAATTATCTAC										gi|731327928|ref|XP_010674779.1|( PREDICTED: uncharacterized protein LOC104890862 [Beta vulgaris subsp. vulgaris])	gi|75213474|sp|Q9SYQ0.1|IDM3_ARATH(RecName: Full=Increased DNA methylation 3; AltName: Full=Alpha-crystallin domain-containing protein 51.9; Short=AtAcd51.9)
Phn-m0106-5p	TRINITY_DN89008_c4_g1	1.8	1	22	21	42	GGGAATATTGTTTTAATGGATG	|:|||||||:||||||||*||:	CTCTTATAATAAAATTACATAT								PF00188.23(CAP:Cysteine-rich secretory protein family)		gi|720030252|ref|XP_010265467.1|( PREDICTED: pathogenesis-related protein PR-1 [Nelumbo nucifera])	gi|2500715|sp|Q40374.1|PR1_MEDTR(RecName: Full=Pathogenesis-related protein PR-1; Flags: Precursor)
Phn-m0106-5p	TRINITY_DN90235_c0_g1	1.8	1	22	1392	1413	GGGAATATTGTTTTAATGGATG	:|:||||||:|||||||||||*	TCTTTATAATAAAATTACCTAA								PF03101.12(FAR1:FAR1 DNA-binding domain); PF00249.28(Myb_DNA-binding:Myb-like DNA-binding domain)		gi|586686000|ref|XP_006841826.1|( PREDICTED: protein FAR1-RELATED SEQUENCE 5 [Amborella trichopoda])	gi|75320414|sp|Q58FS3.1|RAD_ANTMA(RecName: Full=Transcription factor RADIALIS)
Phn-m0106-5p	TRINITY_DN90491_c2_g5	1.8	1	22	2212	2233	GGGAATATTGTTTTAATGGATG	:|:||||||:|||||||::|||	TCTTTATAATAAAATTATTTAC					K04733	IRAK4		PF00069.22(Pkinase:Protein kinase domain); PF07714.14(Pkinase_Tyr:Protein tyrosine kinase)	GO:0006468(biological_process:protein phosphorylation); GO:0005524(molecular_function:ATP binding); GO:0016021(cellular_component:integral component of membrane); GO:0004674(molecular_function:protein serine/threonine kinase activity)	gi|902169129|gb|KNA07615.1|( hypothetical protein SOVF_170170 [Spinacia oleracea])	gi|75330007|sp|Q8LEB6.1|Y5185_ARATH(RecName: Full=Probable receptor-like protein kinase At5g18500)
Phn-m0107-3p	TRINITY_DN86444_c2_g3	1.8	1	24	29	52	AATTAAACGTAAACAATCTGATGT	||:||||||:|||||||||:||*|	TTGATTTGCGTTTGTTAGATTAAA					K02941	RP-LP0, RPLP0	map03010(Ribosome)		GO:0005840(cellular_component:ribosome); GO:0042254(biological_process:ribosome biogenesis)	gi|672158700|ref|XP_008799093.1|( PREDICTED: 60S acidic ribosomal protein P0 [Phoenix dactylifera])	gi|19884289|sp|Q42112.2|RLA02_ARATH(RecName: Full=60S acidic ribosomal protein P0-2)
Phn-m0107-3p	TRINITY_DN86526_c0_g1	1.8	1	24	862	885	AATTAAACGTAAACAATCTGATGT	|||*||||||||||||||*||||:	TTATTTTGCATTTGTTAGCCTACG					K01784	galE, GALE	map00520(Amino sugar and nucleotide sugar metabolism); map00052(Galactose metabolism)	PF16363.2(GDP_Man_Dehyd:GDP-mannose 4,6 dehydratase); PF01370.18(Epimerase:NAD dependent epimerase/dehydratase family); PF00106.22(adh_short:short chain dehydrogenase)	GO:0003978(molecular_function:UDP-glucose 4-epimerase activity); GO:0006012(biological_process:galactose metabolic process)	gi|731330715|ref|XP_010676282.1|( PREDICTED: UDP-glucose 4-epimerase GEPI48-like [Beta vulgaris subsp. vulgaris])	gi|11386854|sp|Q9T0A7.1|UGE2_ARATH(RecName: Full=UDP-glucose 4-epimerase 2; Short=AtUGE2; AltName: Full=UDP-galactose 4-epimerase 2)
Phn-m0107-3p	TRINITY_DN88562_c0_g1	1.8	1	24	687	710	AATTAAACGTAAACAATCTGATGT	|*|:||||||||||||||||||:|	TGAGTTTGCATTTGTTAGACTATA								PF00036.29(EF-hand_1:EF hand); PF13202.3(EF-hand_5:EF hand); PF13405.3(EF-hand_6:EF-hand domain); PF13499.3(EF-hand_7:EF-hand domain pair); PF13833.3(EF-hand_8:EF-hand domain pair)		gi|902233323|gb|KNA22997.1|( hypothetical protein SOVF_028870 [Spinacia oleracea])	gi|75337714|sp|Q9SVG9.1|CML42_ARATH(RecName: Full=Calcium-binding protein CML42; AltName: Full=Calmodulin-like protein 42)
Phn-m0107-3p	TRINITY_DN90399_c4_g4	1.8	1	24	786	809	AATTAAACGTAAACAATCTGATGT	*||:||||||||||||:||:||||	GTAGTTTGCATTTGTTGGATTACA									GO:0000278(biological_process:mitotic cell cycle); GO:0005774(cellular_component:vacuolar membrane); GO:0009908(biological_process:flower development); GO:0009735(biological_process:response to cytokinin); GO:0007166(biological_process:cell surface receptor signaling pathway); GO:0007202(biological_process:activation of phospholipase C activity); GO:0032960(biological_process:regulation of inosit…	gi|731362699|ref|XP_010693024.1|( PREDICTED: G-protein coupled receptor 1 [Beta vulgaris subsp. vulgaris])	gi|75219002|sp|O04714.1|GCR1_ARATH(RecName: Full=G-protein coupled receptor 1)
Phn-m0108-3p	TRINITY_DN86444_c2_g3	1.8	1	24	29	52	AATTAAACGTAAACAATCTGATGT	||:||||||:|||||||||:||*|	TTGATTTGCGTTTGTTAGATTAAA					K02941	RP-LP0, RPLP0	map03010(Ribosome)		GO:0005840(cellular_component:ribosome); GO:0042254(biological_process:ribosome biogenesis)	gi|672158700|ref|XP_008799093.1|( PREDICTED: 60S acidic ribosomal protein P0 [Phoenix dactylifera])	gi|19884289|sp|Q42112.2|RLA02_ARATH(RecName: Full=60S acidic ribosomal protein P0-2)
Phn-m0108-3p	TRINITY_DN86526_c0_g1	1.8	1	24	862	885	AATTAAACGTAAACAATCTGATGT	|||*||||||||||||||*||||:	TTATTTTGCATTTGTTAGCCTACG					K01784	galE, GALE	map00520(Amino sugar and nucleotide sugar metabolism); map00052(Galactose metabolism)	PF16363.2(GDP_Man_Dehyd:GDP-mannose 4,6 dehydratase); PF01370.18(Epimerase:NAD dependent epimerase/dehydratase family); PF00106.22(adh_short:short chain dehydrogenase)	GO:0003978(molecular_function:UDP-glucose 4-epimerase activity); GO:0006012(biological_process:galactose metabolic process)	gi|731330715|ref|XP_010676282.1|( PREDICTED: UDP-glucose 4-epimerase GEPI48-like [Beta vulgaris subsp. vulgaris])	gi|11386854|sp|Q9T0A7.1|UGE2_ARATH(RecName: Full=UDP-glucose 4-epimerase 2; Short=AtUGE2; AltName: Full=UDP-galactose 4-epimerase 2)
Phn-m0108-3p	TRINITY_DN88562_c0_g1	1.8	1	24	687	710	AATTAAACGTAAACAATCTGATGT	|*|:||||||||||||||||||:|	TGAGTTTGCATTTGTTAGACTATA								PF00036.29(EF-hand_1:EF hand); PF13202.3(EF-hand_5:EF hand); PF13405.3(EF-hand_6:EF-hand domain); PF13499.3(EF-hand_7:EF-hand domain pair); PF13833.3(EF-hand_8:EF-hand domain pair)		gi|902233323|gb|KNA22997.1|( hypothetical protein SOVF_028870 [Spinacia oleracea])	gi|75337714|sp|Q9SVG9.1|CML42_ARATH(RecName: Full=Calcium-binding protein CML42; AltName: Full=Calmodulin-like protein 42)
Phn-m0108-3p	TRINITY_DN90399_c4_g4	1.8	1	24	786	809	AATTAAACGTAAACAATCTGATGT	*||:||||||||||||:||:||||	GTAGTTTGCATTTGTTGGATTACA									GO:0000278(biological_process:mitotic cell cycle); GO:0005774(cellular_component:vacuolar membrane); GO:0009908(biological_process:flower development); GO:0009735(biological_process:response to cytokinin); GO:0007166(biological_process:cell surface receptor signaling pathway); GO:0007202(biological_process:activation of phospholipase C activity); GO:0032960(biological_process:regulation of inosit…	gi|731362699|ref|XP_010693024.1|( PREDICTED: G-protein coupled receptor 1 [Beta vulgaris subsp. vulgaris])	gi|75219002|sp|O04714.1|GCR1_ARATH(RecName: Full=G-protein coupled receptor 1)
Phn-m0126-5p	TRINITY_DN87406_c0_g3	1.8	1	22	1163	1184	ATTTTCGATATCTCTGAGATAT	||||||:|||:|:||||||:||	TAAAAGTTATGGGGACTCTGTA					K15601	KDM3		PF08879.7(WRC:WRC); PF02373.19(JmjC:JmjC domain, hydroxylase)		gi|731349942|ref|XP_010686255.1|( PREDICTED: uncharacterized protein LOC104900526 [Beta vulgaris subsp. vulgaris])	gi|75207508|sp|Q9SSE9.1|JMJ25_ARATH(RecName: Full=Lysine-specific demethylase JMJ25; AltName: Full=Jumonji domain-containing protein 25; AltName: Full=Lysine-specific histone demethylase JMJ25; AltName: Full=Protein INCREASE IN BONSAI METHYLATION 1; AltName: Full=Protein JUMONJI 25)
Phn-m0126-5p	TRINITY_DN93173_c3_g4	1.8	1	22	2626	2646	ATTTTCGATATCTCTGAGATAT	||||||*||||||||||:|*||	TAAAAGGTATAGAGACTTT-TA								PF07526.8(POX:Associated with HOX); PF05920.8(Homeobox_KN:Homeobox KN domain); PF00046.26(Homeobox:Homeobox domain)		gi|731355365|ref|XP_010689104.1|( PREDICTED: BEL1-like homeodomain protein 9 [Beta vulgaris subsp. vulgaris])	gi|75265949|sp|Q9SJJ3.1|BLH8_ARATH(RecName: Full=BEL1-like homeodomain protein 8; Short=BEL1-like protein 8; AltName: Full=Protein POUND-FOOLISH)
Phn-m0130-3p	TRINITY_DN87917_c2_g2	1.8	1	24	947	970	AAAATACTCAGAAACATTACATGA	|||||*|||||||||||||*||:|	TTTTACGAGTCTTTGTAATATATT					K08145	SLC2A8, GLUT8		PF00083.21(Sugar_tr:Sugar (and other) transporter); PF07690.13(MFS_1:Major Facilitator Superfamily); PF12832.4(MFS_1_like:MFS_1 like family)	GO:0006810(biological_process:transport); GO:0016020(cellular_component:membrane); GO:0022857(molecular_function:transmembrane transporter activity)	gi|731328328|ref|XP_010674986.1|( PREDICTED: sugar transporter ERD6-like 5 [Beta vulgaris subsp. vulgaris])	gi|117940128|sp|Q3ECP7.2|ERDL5_ARATH(RecName: Full=Sugar transporter ERD6-like 5)
Phn-m0131-5p	TRINITY_DN88149_c0_g1	1.8	1	24	4911	4934	ATCAAAGAAAACAATATTATTTAT	|*|||||||||||||||||:*|||	TCGTTTCTTTTGTTATAATGTATA		NOG119723(R:General function prediction only )		NOG119723()					GO:0008270(molecular_function:zinc ion binding)	gi|870853263|gb|KMT05144.1|( hypothetical protein BVRB_7g172920 [Beta vulgaris subsp. vulgaris])	gi|81880360|sp|Q9CQ29.1|RN151_MOUSE(RecName: Full=RING finger protein 151)
Phn-m0131-5p	TRINITY_DN91652_c1_g3	1.8	2	24	1021	1043	TCAAAGAAAACAATATTATTTAT	|||*|||||||||||||||||||	AGTGTCTTTTGTTATAATAAATA					K15275	SLC35B1		PF08449.8(UAA:UAA transporter family); PF00892.17(EamA:EamA-like transporter family)	GO:0055085(biological_process:transmembrane transport); GO:0016021(cellular_component:integral component of membrane)	gi|731344110|ref|XP_010683236.1|( PREDICTED: UDP-galactose/UDP-glucose transporter 3 [Beta vulgaris subsp. vulgaris])	gi|75191462|sp|Q9M9S6.1|UTR3_ARATH(RecName: Full=UDP-galactose/UDP-glucose transporter 3; Short=AtUTr3)
Phn-m0132-3p	TRINITY_DN83704_c0_g1	1.8	1	22	1610	1631	AAACGTAAACAACATGATGTAT	|||||:|||||||||:|:|*||	TTTGCGTTTGTTGTATTGCCTA	COG2017(G:Carbohydrate transport and metabolism )		COG2017(converts alpha-aldose to the beta-anomer. It is active on D-glucose, L-arabinose, D-xylose, D-galactose, maltose and lactose (By similarity))		K01785	galM, GALM	map00010(Glycolysis / Gluconeogenesis); map00052(Galactose metabolism)	PF01263.17(Aldose_epim:Aldose 1-epimerase)	GO:0030246(molecular_function:carbohydrate binding); GO:0019318(biological_process:hexose metabolic process); GO:0004034(molecular_function:aldose 1-epimerase activity)	gi|731336134|ref|XP_010679093.1|( PREDICTED: aldose 1-epimerase [Beta vulgaris subsp. vulgaris])	gi|67463772|sp|Q96C23.1|GALM_HUMAN(RecName: Full=Aldose 1-epimerase; AltName: Full=Galactose mutarotase)
Phn-m0132-3p	TRINITY_DN84450_c0_g1	1.8	1	22	1617	1638	AAACGTAAACAACATGATGTAT	|||||||||||||*|:||:|||	TTTGCATTTGTTGGATTATATA								PF13431.3(TPR_17:Tetratricopeptide repeat); PF13181.3(TPR_8:Tetratricopeptide repeat)		gi|731348638|ref|XP_010685590.1|( PREDICTED: uncharacterized protein LOC104899983 [Beta vulgaris subsp. vulgaris])	gi|110816488|sp|Q3BAI2.1|YCX91_PHAAO(RecName: Full=Uncharacterized protein ORF91 (chloroplast) [Phalaenopsis aphrodite subsp. formosana])
Phn-m0132-3p	TRINITY_DN86211_c2_g3	1.8	1	22	1292	1314	AAACGTAAACAACATGATGT-AT	|||||||||||||*||||:|*||	TTTGCATTTGTTGGACTATATTA									GO:0003676(molecular_function:nucleic acid binding); GO:0016020(cellular_component:membrane)	gi|950969251|ref|XP_014499777.1|( PREDICTED: uncharacterized protein At2g34160-like [Vigna radiata var. radiata])	gi|73921087|sp|O22969.1|Y2416_ARATH(RecName: Full=Uncharacterized protein At2g34160)
Phn-m0132-3p	TRINITY_DN87568_c2_g3	1.8	1	22	1118	1139	AAACGTAAACAACATGATGTAT	|||||||||||||*|||*:|||	TTTGCATTTGTTGGACTTTATA					K09422	MYBP		PF00249.28(Myb_DNA-binding:Myb-like DNA-binding domain); PF13921.3(Myb_DNA-bind_6:Myb-like DNA-binding domain)	GO:0003677(molecular_function:DNA binding)	gi|1005743107|gb|AMQ23629.1|( myb transcription factor 4 [Silene littorea])	gi|75317981|sp|O22264.1|MYB12_ARATH(RecName: Full=Transcription factor MYB12; AltName: Full=Myb-related protein 12; Short=AtMYB12)
Phn-m0132-3p	TRINITY_DN88126_c1_g5	1.8	1	22	30	51	AAACGTAAACAACATGATGTAT	|||||||||||||*|:||:|||	TTTGCATTTGTTGGATTATATA					K09287	RAV				gi|902222130|gb|KNA19098.1|( hypothetical protein SOVF_064760 [Spinacia oleracea])	gi|75268209|sp|Q9C6P5.1|RAVL2_ARATH(RecName: Full=AP2/ERF and B3 domain-containing transcription factor At1g50680; AltName: Full=RAV1-like ethylene-responsive transcription factor At1g50680)
Phn-m0132-3p	TRINITY_DN88357_c1_g6	1.8	1	22	261	282	AAACGTAAACAACATGATGTAT	|||||||||||||*|||:||*|	TTTGCATTTGTTGGACTGCACA					K07198	PRKAA, AMPK		PF00069.22(Pkinase:Protein kinase domain); PF07714.14(Pkinase_Tyr:Protein tyrosine kinase); PF03822.11(NAF:NAF domain); PF14531.3(Kinase-like:Kinase-like)	GO:0016310(biological_process:phosphorylation); GO:0004672(molecular_function:protein kinase activity); GO:0000166(molecular_function:nucleotide binding)	gi|4884974|gb|AAD31900.1|AF145482_1(AF145482_1 putative serine/threonine protein kinase [Mesembryanthemum crystallinum])	gi|75318580|sp|O65554.1|CIPK6_ARATH(RecName: Full=CBL-interacting serine/threonine-protein kinase 6; AltName: Full=SNF1-related kinase 3.14; AltName: Full=SOS2-like protein kinase PKS4; AltName: Full=SOS3-interacting protein 3)
Phn-m0132-3p	TRINITY_DN90150_c1_g2	1.8	1	22	2139	2160	AAACGTAAACAACATGATGTAT	|||||||||||||*|:||:|||	TTTGCATTTGTTGGATTATATA					K14545	RRP7	map03008(Ribosome biogenesis in eukaryotes)	PF12923.4(RRP7:Ribosomal RNA-processing protein 7 (RRP7))		gi|902188678|gb|KNA11211.1|( hypothetical protein SOVF_137280 isoform A [Spinacia oleracea])	gi|66773938|sp|Q9D1C9.1|RRP7A_MOUSE(RecName: Full=Ribosomal RNA-processing protein 7 homolog A; AltName: Full=Gastric cancer antigen Zg14 homolog)
Phn-m0132-3p	TRINITY_DN90759_c4_g6	1.8	1	22	2502	2523	AAACGTAAACAACATGATGTAT	|||||||||||||*|:||:|||	TTTGCATTTGTTGGATTATATA								PF02704.11(GASA:Gibberellin regulated protein); PF07727.11(RVT_2:Reverse transcriptase (RNA-dependent DNA polymerase))		gi|802550613|ref|XP_012093075.1|( PREDICTED: snakin-1 [Jatropha curcas])	gi|75164757|sp|Q948Z4.1|SNAK1_SOLTU(RecName: Full=Snakin-1; Flags: Precursor)
Phn-m0148-5p	TRINITY_DN90031_c1_g3	1.8	1	22	177	198	AGTAATGGATGGATGACGGATG	*|*||||||||||||||:||||	ACCTTACCTACCTACTGTCTAC					K13680	CSLA		PF00535.23(Glycos_transf_2:Glycosyl transferase family 2); PF13641.3(Glyco_tranf_2_3:Glycosyltransferase like family 2); PF13632.3(Glyco_trans_2_3:Glycosyl transferase family group 2)	GO:0016021(cellular_component:integral component of membrane)	gi|1035909350|gb|OAY38945.1|( hypothetical protein MANES_10G055100 [Manihot esculenta])	gi|75181330|sp|Q9LZR3.1|CSLA9_ARATH(RecName: Full=Glucomannan 4-beta-mannosyltransferase 9; AltName: Full=Cellulose synthase-like protein A9; Short=AtCslA9; AltName: Full=Glucomannan synthase; AltName: Full=Mannan synthase 9; AltName: Full=Protein RESISTANT TO AGROBACTERIUM TRANSFORMATION 4)
Phn-m0154-3p	TRINITY_DN86526_c0_g2	1.8	1	24	1474	1497	AATTTCAGTCCAAAATAACAGGGC	||*||||||||||||:||||||:|	TTTAAGTCAGGTTTTGTTGTCCTG								PF13976.3(gag_pre-integrs:GAG-pre-integrase domain); PF00665.23(rve:Integrase core domain)		gi|723723438|ref|XP_010325229.1|( PREDICTED: uncharacterized protein LOC104648889 [Solanum lycopersicum])	gi|130582|sp|P10978.1|POLX_TOBAC(RecName: Full=Retrovirus-related Pol polyprotein from transposon TNT 1-94; Includes: RecName: Full=Protease; Includes: RecName: Full=Reverse transcriptase; Includes: RecName: Full=Endonuclease)
Phn-m0154-3p	TRINITY_DN86557_c2_g1	1.8	1	24	32	55	AATTTCAGTCCAAAATAACAGGGC	|||||||||||||||*||*|:|||	TTAAAGTCAGGTTTTCTTATTCCG										gi|1012342160|gb|KYP53356.1|( Retrovirus-related Pol polyprotein from transposon TNT 1-94 [Cajanus cajan])	gi|130582|sp|P10978.1|POLX_TOBAC(RecName: Full=Retrovirus-related Pol polyprotein from transposon TNT 1-94; Includes: RecName: Full=Protease; Includes: RecName: Full=Reverse transcriptase; Includes: RecName: Full=Endonuclease)
Phn-m0154-3p	TRINITY_DN87525_c0_g1	1.8	1	24	1200	1223	AATTTCAGTCCAAAATAACAGGGC	|||||||:|||||||*||||:|||	TTAAAGTTAGGTTTTCTTGTTCCG		NOG80975(R:General function prediction only )		NOG80975(division)				PF03776.11(MinE:Septum formation topological specificity factor MinE)	GO:0032955(biological_process:regulation of barrier septum assembly)	gi|731343819|ref|XP_010683082.1|( PREDICTED: cell division topological specificity factor homolog, chloroplastic [Beta vulgaris subsp. vulgaris])	gi|75168864|sp|Q9C4Z7.1|MINE1_ARATH(RecName: Full=Cell division topological specificity factor homolog, chloroplastic; Short=AtMinE1; AltName: Full=Protein ACCUMULATION AND REPLICATION OF CHLOROPLASTS 12; Flags: Precursor)
Phn-m0154-3p	TRINITY_DN88623_c1_g1	1.8	1	24	1213	1236	AATTTCAGTCCAAAATAACAGGGC	|||||||||||||||*||*|:|||	TTAAAGTCAGGTTTTCTTATTCCG					K20307	TRAPPC10, TRS130				gi|731329460|ref|XP_010675603.1|( PREDICTED: uncharacterized protein LOC104891593 [Beta vulgaris subsp. vulgaris])	gi|746001953|sp|F4K0C4.1|TR130_ARATH(RecName: Full=Trafficking protein particle complex II-specific subunit 130 homolog; Short=AtTRS130; Short=TRAPP II-specific subunit 130 homolog)
Phn-m0154-3p	TRINITY_DN90823_c4_g1	1.8	1	24	1851	1874	AATTTCAGTCCAAAATAACAGGGC	|||||||:|||||||*||||:|||	TTAAAGTTAGGTTTTCTTGTTCCG					K01285	PRCP		PF05577.9(Peptidase_S28:Serine carboxypeptidase S28)	GO:0008238(molecular_function:exopeptidase activity); GO:0008236(molecular_function:serine-type peptidase activity)	gi|225448871|ref|XP_002270231.1|( PREDICTED: lysosomal Pro-X carboxypeptidase [Vitis vinifera])	gi|122137021|sp|Q2TA14.1|PCP_BOVIN(RecName: Full=Lysosomal Pro-X carboxypeptidase; AltName: Full=Proline carboxypeptidase; AltName: Full=Prolylcarboxypeptidase; Short=PRCP; Flags: Precursor)
Phn-m0154-3p	TRINITY_DN92872_c6_g1	1.8	1	24	331	354	AATTTCAGTCCAAAATAACAGGGC	|||||*|:|||||||||||||:||	TTAAATTTAGGTTTTATTGTCTCG										gi|902166627|gb|KNA07255.1|( hypothetical protein SOVF_173550, partial [Spinacia oleracea])	gi|75171492|sp|Q9FLM1.1|GDPD2_ARATH(RecName: Full=Glycerophosphodiester phosphodiesterase GDPD2; AltName: Full=Glycerophosphodiester phosphodiesterase 2; Short=AtGDPD2)
Phn-m0155-5p	TRINITY_DN86458_c3_g1	1.8	1	24	1413	1436	TTGGAAACAATCTCTTTGTGATAT	|:|||||||||*|||||:||||||	AGCCTTTGTTAAAGAAATACTATA								PF01734.19(Patatin:Patatin-like phospholipase)	GO:0006629(biological_process:lipid metabolic process)	gi|731349574|ref|XP_010686063.1|( PREDICTED: probable inactive patatin-like protein 9 [Beta vulgaris subsp. vulgaris])	gi|75163809|sp|Q93ZQ3.1|PLP9_ARATH(RecName: Full=Probable inactive patatin-like protein 9; Short=AtPLP9; AltName: Full=Patatin-related phospholipase A IIIdelta; Short=pPLAIIId; AltName: Full=Phospholipase A IIIB; Short=AtPLAIIIB)
Phn-m0155-5p	TRINITY_DN86930_c1_g3	1.8	1	24	3487	3510	TTGGAAACAATCTCTTTGTGATAT	:|||||||||:|||||||||*||*	GACCTTTGTTGGAGAAACACAATT		NOG131202(S:Function unknown )		NOG131202(glucan endo-1-3-beta-glucosidase)				PF00332.15(Glyco_hydro_17:Glycosyl hydrolases family 17); PF02298.14(Cu_bind_like:Plastocyanin-like domain)	GO:0016021(cellular_component:integral component of membrane); GO:0005975(biological_process:carbohydrate metabolic process); GO:0004553(molecular_function:hydrolase activity, hydrolyzing O-glycosyl compounds)	gi|731353233|ref|XP_010687954.1|( PREDICTED: glucan endo-1,3-beta-glucosidase 14 isoform X1 [Beta vulgaris subsp. vulgaris])	gi|75216237|sp|Q9ZQG9.2|E1314_ARATH(RecName: Full=Glucan endo-1,3-beta-glucosidase 14; AltName: Full=(1->3)-beta-glucan endohydrolase 14; Short=(1->3)-beta-glucanase 14; AltName: Full=Beta-1,3-endoglucanase 14; Short=Beta-1,3-glucanase 14; Flags: Precursor)
Phn-m0155-5p	TRINITY_DN89622_c0_g1	1.8	1	24	356	379	TTGGAAACAATCTCTTTGTGATAT	|:||||||||:||||||||:||*|	AGCCTTTGTTGGAGAAACATTACA					K04733	IRAK4				gi|1021050104|gb|KZN07882.1|( hypothetical protein DCAR_000551 [Daucus carota subsp. sativus])	gi|75330719|sp|Q8RWW0.1|ALE2_ARATH(RecName: Full=Receptor-like serine/threonine-protein kinase ALE2; AltName: Full=Protein ABNORMAL LEAF SHAPE 2; Flags: Precursor)
Phn-m0155-5p	TRINITY_DN90425_c3_g3	1.8	1	24	186	209	TTGGAAACAATCTCTTTGTGATAT	||||||||||:||||||*:|||*|	AACCTTTGTTGGAGAAAGGCTACA	COG0443(O:Posttranslational modification, protein turnover, chaperones )		COG0443(heat shock protein 70)		K09490	HSPA5, BIP	map03060(Protein export); map04141(Protein processing in endoplasmic reticulum)	PF00012.17(HSP70:Hsp70 protein); PF06723.10(MreB_Mbl:MreB/Mbl protein); PF14450.3(FtsA:Cell division protein FtsA); PF10712.6(NAD-GH:NAD-specific glutamate dehydrogenase)	GO:0005788(cellular_component:endoplasmic reticulum lumen); GO:0005524(molecular_function:ATP binding)	gi|731321538|ref|XP_010671405.1|( PREDICTED: luminal-binding protein [Beta vulgaris subsp. vulgaris])	gi|3913786|sp|Q42434.1|BIP_SPIOL(RecName: Full=Luminal-binding protein; Short=BiP; AltName: Full=78 kDa glucose-regulated protein homolog; Short=GRP-78; Flags: Precursor)
Phn-m0162-5p	TRINITY_DN85334_c0_g1	1.8	1	24	873	896	AAATGAGATTGTACCACCGGGTGG	||||:|||||||*|||||||:|||	TTTATTCTAACACGGTGGCCTACC								PF13516.3(LRR_6:Leucine Rich repeat); PF12937.4(F-box-like:F-box-like)		gi|902205266|gb|KNA15134.1|( hypothetical protein SOVF_101060 [Spinacia oleracea])	gi|75267749|sp|Q9ZPE4.1|FBW2_ARATH(RecName: Full=F-box protein FBW2; AltName: Full=SKP1-interacting partner 18)
Phn-m0162-5p	TRINITY_DN86017_c2_g7	1.8	1	24	532	556	AAATGAGATTGTACCACC-GGGTGG	||||||||||||||||||*::||:*	TTTACTCTAACATGGTGGATTCATG								PF13855.3(LRR_8:Leucine rich repeat); PF12799.4(LRR_4:Leucine Rich repeats (2 copies)); PF00560.30(LRR_1:Leucine Rich Repeat); PF13516.3(LRR_6:Leucine Rich repeat)	GO:0016020(cellular_component:membrane)	gi|902099075|gb|KNA03455.1|( hypothetical protein SOVF_209020 [Spinacia oleracea])	gi|75273991|sp|Q9LSI9.1|BIR2_ARATH(RecName: Full=Inactive LRR receptor-like serine/threonine-protein kinase BIR2; AltName: Full=Protein BAK1-INTERACTING RECEPTOR-LIKE KINASE 2; Flags: Precursor)
Phn-m0162-5p	TRINITY_DN92342_c0_g2	1.8	1	24	464	487	AAATGAGATTGTACCACCGGGTGG	|||||||||||:*|||||:|||||	TTTACTCTAACGCGGTGGTCCACC										gi|902181198|gb|KNA09693.1|( hypothetical protein SOVF_151260 [Spinacia oleracea])	gi|75313543|sp|Q9SKX1.1|IBH1_ARATH(RecName: Full=Transcription factor IBH1; Short=AtIBH1; AltName: Full=Basic helix-loop-helix protein 158; Short=OsbHLH158; AltName: Full=Protein ILI1-BINDING BHLH 1; AltName: Full=bHLH transcription factor bHLH158; AltName: Full=bHLH zeta)
Phn-m0164-5p	TRINITY_DN86598_c0_g1	1.8	1	24	2662	2686	CTTTATATATATCAAGGG-GTTACT	|||||||||||:|||:||*|:||||	GAAATATATATGGTTTCCTCGATGA					K11426	SMYD		PF00856.25(SET:SET domain); PF01753.15(zf-MYND:MYND finger)		gi|731360964|ref|XP_010692102.1|( PREDICTED: histone-lysine N-methyltransferase ASHR2-like isoform X1 [Beta vulgaris subsp. vulgaris])	gi|94707155|sp|Q9ZUM9.3|ASHR2_ARATH(RecName: Full=Histone-lysine N-methyltransferase ASHR2; AltName: Full=ASH1-related protein 2; AltName: Full=Protein SET DOMAIN GROUP 39)
Phn-m0168-5p	TRINITY_DN85222_c0_g1	1.8	1	24	143	165	GTAAAACTCGAAATACTATAATGT	||||||||||||||||:*|||*|:	CATTTTGAGCTTTATGGGATT-CG								PF00010.23(HLH:Helix-loop-helix DNA-binding domain)		gi|731367353|ref|XP_010695562.1|( PREDICTED: transcription factor bHLH71-like [Beta vulgaris subsp. vulgaris])	gi|75308860|sp|Q9C7T4.1|BH096_ARATH(RecName: Full=Transcription factor bHLH96; AltName: Full=Basic helix-loop-helix protein 96; Short=AtbHLH96; Short=bHLH 96; AltName: Full=Transcription factor EN 15; AltName: Full=bHLH transcription factor bHLH096)
Phn-m0182-5p	TRINITY_DN88786_c1_g1	1.8	1	24	2424	2447	AGGTTATATAACGTTGATTGAGCC	||||||:|||||:||||||||:|*	TCCAATGTATTGTAACTAACTTGA								PF03547.15(Mem_trans:Membrane transport protein)	GO:0055085(biological_process:transmembrane transport); GO:0016021(cellular_component:integral component of membrane)	gi|702482849|ref|XP_010033614.1|( PREDICTED: uncharacterized transporter C5D6.04-like [Eucalyptus grandis])	gi|75169730|sp|Q9C9K5.1|PILS3_ARATH(RecName: Full=Protein PIN-LIKES 3; AltName: Full=Auxin efflux carrier-like protein 3)
Phn-m0183-5p	TRINITY_DN135737_c0_g1	1.8	1	21	496	516	TTTAATGGCAGGTAGAGCAGC	||:||||||||||||||*|:*	AAGTTACCGTCCATCTCCTTT	COG5262(B:Chromatin structure and dynamics )		COG5262(histone h2a)		K11251	H2A		PF16211.2(Histone_H2A_C:C-terminus of histone H2A); PF00125.21(Histone:Core histone H2A/H2B/H3/H4); PF00808.20(CBFD_NFYB_HMF:Histone-like transcription factor (CBF/NF-Y) and archaeal histone)	GO:0000786(cellular_component:nucleosome); GO:0000790(cellular_component:nuclear chromatin); GO:0003677(molecular_function:DNA binding); GO:0006342(biological_process:chromatin silencing); GO:0046982(molecular_function:protein heterodimerization activity)	gi|729438828|ref|XP_010520877.1|( PREDICTED: probable histone H2A.3 [Tarenaya hassleriana])	gi|75279005|sp|O81826.1|H2A3_ARATH(RecName: Full=Probable histone H2A.3; AltName: Full=HTA2)
Phn-m0184-3p	TRINITY_DN88384_c0_g1	1.8	1	24	1939	1963	GGTTTAAACCGTATCGTATTCGT-T	:*|||||||||||||||||||||*|	TAAAATTTGGCATAGCATAAGCATA	COG2890(J:Translation, ribosomal structure and biogenesis )		COG2890(Methylates the class 1 translation termination release factors RF1 PrfA and RF2 PrfB on the glutamine residue of the universally conserved GGQ motif (By similarity))		K19589	N6AMT1		PF05175.11(MTS:Methyltransferase small domain); PF13847.3(Methyltransf_31:Methyltransferase domain); PF13649.3(Methyltransf_25:Methyltransferase domain); PF13489.3(Methyltransf_23:Methyltransferase domain)	GO:0003676(molecular_function:nucleic acid binding); GO:0006479(biological_process:protein methylation); GO:0008276(molecular_function:protein methyltransferase activity)	gi|902181404|gb|KNA09733.1|( hypothetical protein SOVF_150900 [Spinacia oleracea])	gi|313104228|sp|Q9Y5N5.3|HEMK2_HUMAN(RecName: Full=HemK methyltransferase family member 2; AltName: Full=M.HsaHemK2P; AltName: Full=N(6)-adenine-specific DNA methyltransferase 1)
Phn-m0186-3p	TRINITY_DN90558_c3_g1	1.8	1	20	1367	1386	TCTTGAGTCGATCGACTGGG	|*|||||||||||||||*|:	AAAACTCAGCTAGCTGAGCT					K04554	UBE2J2, NCUBE2, UBC6	map04120(Ubiquitin mediated proteolysis); map04141(Protein processing in endoplasmic reticulum)			gi|1028997436|ref|XP_016753491.1|( PREDICTED: ubiquitin-conjugating enzyme E2 34-like [Gossypium hirsutum])	gi|75309152|sp|Q9FK29.1|UBC33_ARATH(RecName: Full=Probable ubiquitin-conjugating enzyme E2 33; AltName: Full=E2 ubiquitin-conjugating enzyme 33; AltName: Full=Ubiquitin carrier protein 33)
Phn-m0186-3p	TRINITY_DN90558_c3_g1	1.8	1	20	1302	1321	TCTTGAGTCGATCGACTGGG	**|||||||||||||||||:	TAAACTCAGCTAGCTGACCT					K04554	UBE2J2, NCUBE2, UBC6	map04120(Ubiquitin mediated proteolysis); map04141(Protein processing in endoplasmic reticulum)			gi|1028997436|ref|XP_016753491.1|( PREDICTED: ubiquitin-conjugating enzyme E2 34-like [Gossypium hirsutum])	gi|75309152|sp|Q9FK29.1|UBC33_ARATH(RecName: Full=Probable ubiquitin-conjugating enzyme E2 33; AltName: Full=E2 ubiquitin-conjugating enzyme 33; AltName: Full=Ubiquitin carrier protein 33)
Phn-m0189-5p	TRINITY_DN87444_c3_g1	1.8	1	21	1555	1575	TTTTGCATAGGCCATCAAGTA	:||:|||:||||||||||*||	GAAGCGTGTCCGGTAGTTAAT					K17964	LRPPRC		PF13041.3(PPR_2:PPR repeat family); PF12854.4(PPR_1:PPR repeat); PF01535.17(PPR:PPR repeat); PF13812.3(PPR_3:Pentatricopeptide repeat domain); PF17177.1(PPR_long:Pentacotripeptide-repeat region of PROPR); PF10037.6(MRP-S27:Mitochondrial 28S ribosomal protein S27); PF06239.8(ECSIT:Evolutionarily conserved signalling intermediate in Toll pathway)		gi|902107046|gb|KNA03660.1|( hypothetical protein SOVF_207010, partial [Spinacia oleracea])	gi|193806393|sp|P0C7Q7.1|PPR38_ARATH(RecName: Full=Putative pentatricopeptide repeat-containing protein At1g12700, mitochondrial; Flags: Precursor)
Phn-m0190-5p	TRINITY_DN87444_c3_g1	1.8	1	21	1555	1575	TTTTGCATAGGCCATCAAGTA	:||:|||:||||||||||*||	GAAGCGTGTCCGGTAGTTAAT					K17964	LRPPRC		PF13041.3(PPR_2:PPR repeat family); PF12854.4(PPR_1:PPR repeat); PF01535.17(PPR:PPR repeat); PF13812.3(PPR_3:Pentatricopeptide repeat domain); PF17177.1(PPR_long:Pentacotripeptide-repeat region of PROPR); PF10037.6(MRP-S27:Mitochondrial 28S ribosomal protein S27); PF06239.8(ECSIT:Evolutionarily conserved signalling intermediate in Toll pathway)		gi|902107046|gb|KNA03660.1|( hypothetical protein SOVF_207010, partial [Spinacia oleracea])	gi|193806393|sp|P0C7Q7.1|PPR38_ARATH(RecName: Full=Putative pentatricopeptide repeat-containing protein At1g12700, mitochondrial; Flags: Precursor)
Phn-m0216-5p	TRINITY_DN87081_c1_g4	1.8	1	24	2453	2476	GTTGTATGTATATAACGGGGTTTT	||||||||:|||:|||||::||:|	CAACATACGTATGTTGCCTTAAGA		NOG128058(S:Function unknown )		NOG128058(BTB POZ domain-containing protein)				PF00651.28(BTB:BTB/POZ domain); PF07707.12(BACK:BTB And C-terminal Kelch)	GO:0004842(molecular_function:ubiquitin-protein transferase activity); GO:0016567(biological_process:protein ubiquitination); GO:0031463(cellular_component:Cul3-RING ubiquitin ligase complex); GO:0005634(cellular_component:nucleus); GO:0010114(biological_process:response to red light)	gi|902210049|gb|KNA16335.1|( hypothetical protein SOVF_090030 [Spinacia oleracea])	gi|327488374|sp|Q9FPW6.2|POB1_ARATH(RecName: Full=BTB/POZ domain-containing protein POB1; AltName: Full=POZ/BTB CONTAINING-PROTEIN 1; Short=AtPOB1)
Phn-m0216-5p	TRINITY_DN89051_c2_g1	1.8	1	24	1296	1318	GTTGTATGTATATAACGGGGTTTT	||||||||:||||||||*||||:*	CAACATACGTATATTGC-CCAAGT					K02201	E2.7.7.3B	map00770(Pantothenate and CoA biosynthesis)		GO:0009058(biological_process:biosynthetic process); GO:0003824(molecular_function:catalytic activity)	gi|1026001521|ref|XP_016552665.1|( PREDICTED: phosphopantetheine adenylyltransferase-like [Capsicum annuum])	gi|75267775|sp|Q9ZPV8.1|COAD_ARATH(RecName: Full=Phosphopantetheine adenylyltransferase; AltName: Full=AtCoaD; AltName: Full=Dephospho-CoA pyrophosphorylase; AltName: Full=Pantetheine-phosphate adenylyltransferase)
Phn-m0216-5p	TRINITY_DN89840_c1_g1	1.8	1	24	4083	4107	GTTGTATGTATATAACGG-GGTTTT	||||||||:|||||||||*|:*|||	CAACATACGTATATTGCCACTTAAA		NOG04226(I:Lipid transport and metabolism )		NOG04226(DiacylGlycerol Kinase)	K00901	dgkA, DGK	map00564(Glycerophospholipid metabolism); map04070(Phosphatidylinositol signaling system); map00561(Glycerolipid metabolism)	PF00609.16(DAGK_acc:Diacylglycerol kinase accessory domain); PF00781.21(DAGK_cat:Diacylglycerol kinase catalytic domain); PF00130.19(C1_1:Phorbol esters/diacylglycerol binding domain (C1 domain))	GO:0035556(biological_process:intracellular signal transduction); GO:0007205(biological_process:protein kinase C-activating G-protein coupled receptor signaling pathway); GO:0005622(cellular_component:intracellular); GO:0016310(biological_process:phosphorylation); GO:0005524(molecular_function:ATP binding); GO:0016021(cellular_component:integral component of membrane); GO:0004143(molecular_functi…	gi|902147437|gb|KNA05158.1|( hypothetical protein SOVF_193030 [Spinacia oleracea])	gi|75262391|sp|Q9FFN7.1|DGK2_ARATH(RecName: Full=Diacylglycerol kinase 2; Short=AtDGK2; Short=DAG kinase 2; AltName: Full=Diglyceride kinase 2; Short=DGK 2)
Phn-m0216-5p	TRINITY_DN90187_c3_g2	1.8	1	24	226	248	GTTGTATGTATATAACGGGGTTTT	|||||||||||||||||*|:|**|	CAACATACATATATTGC-CTACTA		NOG39657(R:General function prediction only )		NOG39657(esterase)				PF12146.5(Hydrolase_4:Serine aminopeptidase, S33); PF00561.17(Abhydrolase_1:alpha/beta hydrolase fold); PF12697.4(Abhydrolase_6:Alpha/beta hydrolase family)	GO:0016787(molecular_function:hydrolase activity)	gi|902179404|gb|KNA09353.1|( hypothetical protein SOVF_154250 [Spinacia oleracea])	gi|75337194|sp|Q9SG92.1|MES17_ARATH(RecName: Full=Methylesterase 17; Short=AtMES17; AltName: Full=Methyl indole-3-acetic acid esterase)
Phn-m0216-5p	TRINITY_DN92995_c0_g1	1.8	1	24	3833	3856	GTTGTATGTATATAACGGGGTTTT	||||||||||||||||:|*||:*|	CAACATACATATATTGTCACAGTA	COG0421(E:Amino acid transport and metabolism )		COG0421(Catalyzes the production of spermidine from putrescine and decarboxylated S-adenosylmethionine (dcSAM), which serves as an aminopropyl donor (By similarity))		K00797	speE, SRM	map00270(Cysteine and methionine metabolism); map00480(Glutathione metabolism); map00330(Arginine and proline metabolism); map00410(beta-Alanine metabolism)	PF01564.14(Spermine_synth:Spermine/spermidine synthase); PF13649.3(Methyltransf_25:Methyltransferase domain)	GO:0016740(molecular_function:transferase activity); GO:0006595(biological_process:polyamine metabolic process)	gi|56791818|gb|AAW30410.1|( spermidine synthase X, partial [Silene latifolia])	gi|12230014|sp|Q9ZUB3.1|SPD1_ARATH(RecName: Full=Spermidine synthase 1; Short=SPDSY 1; AltName: Full=Putrescine aminopropyltransferase 1)
Phn-m0220-5p	TRINITY_DN85994_c3_g7	1.8	1	24	215	238	AAGGCACTGGGATAATGTTGTTGT	*|||||*|||||||||||||||:|	CTCCGTAACCCTATTACAACAATA											gi|75291901|sp|Q6RVV4.1|TIC32_PEA(RecName: Full=Short-chain dehydrogenase TIC 32, chloroplastic; AltName: Full=Translocon at the inner envelope membrane of chloroplasts 32; Short=PsTIC32)
Phn-m0220-5p	TRINITY_DN90735_c2_g5	1.8	1	24	190	213	AAGGCACTGGGATAATGTTGTTGT	||:||||||||*|||||||||:||	TTTCGTGACCCCATTACAACAGCA					K09422	MYBP		PF00249.28(Myb_DNA-binding:Myb-like DNA-binding domain); PF13921.3(Myb_DNA-bind_6:Myb-like DNA-binding domain)	GO:0003677(molecular_function:DNA binding)	gi|731335687|ref|XP_010678849.1|( PREDICTED: transcription factor MYB86-like [Beta vulgaris subsp. vulgaris])	gi|56749347|sp|Q8LPH6.1|MYB86_ARATH(RecName: Full=Transcription factor MYB86; AltName: Full=Myb homolog 4; Short=AtMyb4; AltName: Full=Myb-related protein 86; Short=AtMYB86)
Phn-m0220-5p	TRINITY_DN91792_c1_g1	1.8	1	24	238	261	AAGGCACTGGGATAATGTTGTTGT	|||||||||::|||||||:|*|||	TTCCGTGACTTTATTACAGCCACA								PF02990.13(EMP70:Endomembrane protein 70)	GO:0016020(cellular_component:membrane)	gi|731349472|ref|XP_010686009.1|( PREDICTED: transmembrane 9 superfamily member 5 isoform X1 [Beta vulgaris subsp. vulgaris])	gi|728048691|sp|F4HW17.1|TMN5_ARATH(RecName: Full=Transmembrane 9 superfamily member 5; AltName: Full=Endomembrane protein 11; AltName: Full=Transmembrane nine protein 5; Short=AtTMN5; Flags: Precursor)
Phn-m0222-3p	TRINITY_DN92852_c0_g1	1.8	1	21	2051	2071	GGCCTGAATTGCAATTTAGTT	||*||||||||||||||*|:|	CCAGACTTAACGTTAAACCGA					K17637	EXOC2, SEC5		PF03468.11(XS:XS domain)	GO:0000145(cellular_component:exocyst); GO:0006893(biological_process:Golgi to plasma membrane transport)	gi|902158936|gb|KNA06277.1|( hypothetical protein SOVF_182640 [Spinacia oleracea])	gi|565830538|sp|F4HWE6.1|SEC5B_ARATH(RecName: Full=Exocyst complex component SEC5B; Short=AtSec5b)
Phn-m0224-3p	TRINITY_DN92852_c0_g1	1.8	1	21	2051	2071	GGCCTGAATTGCAATTTAGTT	||*||||||||||||||*|:|	CCAGACTTAACGTTAAACCGA					K17637	EXOC2, SEC5		PF03468.11(XS:XS domain)	GO:0000145(cellular_component:exocyst); GO:0006893(biological_process:Golgi to plasma membrane transport)	gi|902158936|gb|KNA06277.1|( hypothetical protein SOVF_182640 [Spinacia oleracea])	gi|565830538|sp|F4HWE6.1|SEC5B_ARATH(RecName: Full=Exocyst complex component SEC5B; Short=AtSec5b)
Phn-m0225-3p	TRINITY_DN92852_c0_g1	1.8	1	21	2051	2071	GGCCTGAATTGCAATTTAGTT	||*||||||||||||||*|:|	CCAGACTTAACGTTAAACCGA					K17637	EXOC2, SEC5		PF03468.11(XS:XS domain)	GO:0000145(cellular_component:exocyst); GO:0006893(biological_process:Golgi to plasma membrane transport)	gi|902158936|gb|KNA06277.1|( hypothetical protein SOVF_182640 [Spinacia oleracea])	gi|565830538|sp|F4HWE6.1|SEC5B_ARATH(RecName: Full=Exocyst complex component SEC5B; Short=AtSec5b)
Phn-m0237-3p	TRINITY_DN93086_c0_g5	1.8	1	22	510	531	TTCTCCCTTGGATCTTGGTTGA	:||||||||||||||||::|**	GAGAGGGAACCTAGAACTGAGG								PF00197.15(Kunitz_legume:Trypsin and protease inhibitor)		gi|902194163|gb|KNA12470.1|( hypothetical protein SOVF_125760 [Spinacia oleracea])	gi|6166552|sp|P13087.3|MIRA_SYNDU(RecName: Full=Miraculin; Short=MIR; Flags: Precursor [Synsepalum dulcificum])
Phn-m0246-5p	TRINITY_DN93266_c4_g1	1.8	1	22	566	587	TTAGCCAAGTATCACGAGATCT	|||:|||*|||||||||||:||	AATTGGTACATAGTGCTCTGGA								PF03479.12(DUF296:Domain of unknown function (DUF296))		gi|731322585|ref|XP_010671977.1|( PREDICTED: putative DNA-binding protein ESCAROLA [Beta vulgaris subsp. vulgaris])	gi|75265546|sp|Q9SB31.1|AHL3_ARATH(RecName: Full=AT-hook motif nuclear-localized protein 3)
Phn-m0248-3p	TRINITY_DN88551_c4_g2	1.8	1	20	2096	2115	TCGGGGGGGTGGGTGCAGGG	||||||||||||*||||:::	AGCCCCCCCACCGACGTTTT										gi|902205145|gb|KNA15098.1|( hypothetical protein SOVF_101240 [Spinacia oleracea])	gi|75266001|sp|Q9SKN2.1|DRB2_ARATH(RecName: Full=Double-stranded RNA-binding protein 2; AltName: Full=dsRNA-binding protein 2; Short=AtDRB2)
Phn-m0257-5p	TRINITY_DN89188_c9_g5	1.8	1	21	110	129	GTAAATCAACGAACAAATCCT	:|||||||||||||*||*|||	TATTTAGTTGCTTGCTT-GGA					K13425	WRKY22	map04016(MAPK signaling pathway - plant); map04626(Plant-pathogen interaction)		GO:0006355(biological_process:regulation of transcription, DNA-templated); GO:0043565(molecular_function:sequence-specific DNA binding); GO:0003700(molecular_function:transcription factor activity, sequence-specific DNA binding)	gi|902223598|gb|KNA19505.1|( hypothetical protein SOVF_060460 [Spinacia oleracea])	gi|29839444|sp|O04609.1|WRK22_ARATH(RecName: Full=WRKY transcription factor 22; AltName: Full=WRKY DNA-binding protein 22)
Phn-m0267-5p	TRINITY_DN88345_c0_g6	1.8	1	22	52	73	GGGATTCAGAGTCGATCGACTG	:|||:||||*||||||||||||	TCCTGAGTCCCAGCTAGCTGAC								PF12799.4(LRR_4:Leucine Rich repeats (2 copies)); PF00560.30(LRR_1:Leucine Rich Repeat)	GO:0016020(cellular_component:membrane)	gi|731336156|ref|XP_010679104.1|( PREDICTED: receptor-like protein 12 [Beta vulgaris subsp. vulgaris])	gi|75112604|sp|Q5Z9N5.1|FON1_ORYSJ(RecName: Full=Leucine-rich repeat receptor-like kinase protein FLORAL ORGAN NUMBER1; Short=OsFON1; AltName: Full=CLV1-like LRR receptor kinase; Flags: Precursor)
Phn-m0270-3p	TRINITY_DN92116_c1_g7	1.8	1	21	1600	1620	AAAATTCCAGTCGATCGACTC	**|||||||||||||||||:|	CCTTAAGGTCAGCTAGCTGGG								PF05755.9(REF:Rubber elongation factor protein (REF))		gi|902237146|gb|KNA24656.1|( hypothetical protein SOVF_013450 [Spinacia oleracea])	gi|14424100|sp|Q9FYF7.1|Y1736_ARATH(RecName: Full=REF/SRPP-like protein At1g67360)
Phn-m0271-5p	TRINITY_DN92116_c1_g7	1.8	1	20	1601	1620	GGAATTTGAGTCGATCGACT	||||||:*|||||||||||:	CCTTAAGGTCAGCTAGCTGG								PF05755.9(REF:Rubber elongation factor protein (REF))		gi|902237146|gb|KNA24656.1|( hypothetical protein SOVF_013450 [Spinacia oleracea])	gi|14424100|sp|Q9FYF7.1|Y1736_ARATH(RecName: Full=REF/SRPP-like protein At1g67360)
Phn-m0281-5p	TRINITY_DN86682_c1_g1	1.8	1	22	4312	4334	ATTCAGTCTAAAAGAACATG-GT	|||||||||||*||||||||*:|	TAAGTCAGATTCTCTTGTACTTA								PF01842.22(ACT:ACT domain)	GO:0008152(biological_process:metabolic process); GO:0016597(molecular_function:amino acid binding)	gi|731313293|ref|XP_010679322.1|( PREDICTED: uncharacterized protein LOC104894719 [Beta vulgaris subsp. vulgaris])	gi|75219573|sp|O49285.1|ACR3_ARATH(RecName: Full=ACT domain-containing protein ACR3; AltName: Full=Protein ACT DOMAIN REPEATS 3)
Phn-m0281-5p	TRINITY_DN86862_c6_g2	1.8	1	22	250	271	ATTCAGTCTAAAAGAACATGGT	*|*||||||||||||||||||:	AATGTCAGATTTTCTTGTACCG					K07937	ARF1	map04144(Endocytosis)		GO:0005525(molecular_function:GTP binding); GO:0005622(cellular_component:intracellular); GO:0007264(biological_process:small GTPase mediated signal transduction)	gi|1029090749|ref|XP_016705456.1|( PREDICTED: ADP-ribosylation factor 2-B isoform X1 [Gossypium hirsutum])	gi|11131023|sp|O48649.3|ARF1_SALBA(RecName: Full=ADP-ribosylation factor 1)
Phn-m0281-5p	TRINITY_DN86889_c2_g1	1.8	1	22	1129	1150	ATTCAGTCTAAAAGAACATGGT	*||*||||||||||||||||:|	AAATTCAGATTTTCTTGTACTA	COG0471(P:Inorganic ion transport and metabolism )		COG0471(Transporter)		K14445	SLC13A2_3_5		PF00939.16(Na_sulph_symp:Sodium:sulfate symporter transmembrane region); PF03600.13(CitMHS:Citrate transporter); PF02040.12(ArsB:Arsenical pump membrane protein)	GO:0016021(cellular_component:integral component of membrane); GO:0006814(biological_process:sodium ion transport); GO:0055085(biological_process:transmembrane transport); GO:0005215(molecular_function:transporter activity)	gi|902235753|gb|KNA24065.1|( hypothetical protein SOVF_019120 [Spinacia oleracea])	gi|71153589|sp|Q8LG88.2|TDT_ARATH(RecName: Full=Tonoplast dicarboxylate transporter; Short=AttDT; AltName: Full=Sodium-dicarboxylate cotransporter-like; Short=AtSDAT; AltName: Full=Vacuolar malate transporter)
Phn-m0281-5p	TRINITY_DN87164_c2_g4	1.8	1	22	181	202	ATTCAGTCTAAAAGAACATGGT	|||||||*:||||||||||||:	TAAGTCACGTTTTCTTGTACCG					K03869	CUL3	map04120(Ubiquitin mediated proteolysis)			gi|728835593|gb|KHG15036.1|( Cullin-3A -like protein [Gossypium arboreum])	gi|75315944|sp|Q9ZVH4.1|CUL3A_ARATH(RecName: Full=Cullin-3A; Short=AtCUL3a)
Phn-m0281-5p	TRINITY_DN87775_c1_g1	1.8	1	22	1252	1273	ATTCAGTCTAAAAGAACATGGT	*|||||||:|||||||||*||:	CAAGTCAGGTTTTCTTGTCCCG										gi|731373898|ref|XP_010666788.1|( PREDICTED: cyclin-U1-1 [Beta vulgaris subsp. vulgaris])	gi|75311211|sp|Q9LJ45.1|CCU11_ARATH(RecName: Full=Cyclin-U1-1; Short=CycU1;1; AltName: Full=Cyclin-P2.1; Short=CycP2;1)
Phn-m0281-5p	TRINITY_DN88283_c2_g1	1.8	1	22	117	138	ATTCAGTCTAAAAGAACATGGT	||||||||||||*|||||*||:	TAAGTCAGATTTACTTGTCCCG		NOG123017(K:Transcription )		NOG123017(Myb-like DNA-binding domain)				PF14379.3(Myb_CC_LHEQLE:MYB-CC type transfactor, LHEQLE motif)		gi|731324940|ref|XP_010673243.1|( PREDICTED: protein PHR1-LIKE 1-like isoform X2 [Beta vulgaris subsp. vulgaris])	gi|75337328|sp|Q9SJW0.1|PHL7_ARATH(RecName: Full=Myb family transcription factor PHL7; AltName: Full=Protein PHR1-LIKE 7)
Phn-m0281-5p	TRINITY_DN89351_c2_g1	1.8	1	22	3744	3765	ATTCAGTCTAAAAGAACATGGT	*|||||||:|||||||||*||:	AAAGTCAGGTTTTCTTGTCCCG								PF07714.14(Pkinase_Tyr:Protein tyrosine kinase); PF00069.22(Pkinase:Protein kinase domain); PF00954.17(S_locus_glycop:S-locus glycoprotein domain); PF01453.21(B_lectin:D-mannose binding lectin); PF08276.8(PAN_2:PAN-like domain)		gi|731345906|ref|XP_010684168.1|( PREDICTED: G-type lectin S-receptor-like serine/threonine-protein kinase At1g11300 [Beta vulgaris subsp. vulgaris])	gi|75266612|sp|Q9SXB4.1|Y1130_ARATH(RecName: Full=G-type lectin S-receptor-like serine/threonine-protein kinase At1g11300; Flags: Precursor)
Phn-m0281-5p	TRINITY_DN89757_c4_g1	1.8	1	22	189	210	ATTCAGTCTAAAAGAACATGGT	|||||||*:|||||||||||:|	TAAGTCATGTTTTCTTGTACTA										gi|731328501|ref|XP_010675086.1|( PREDICTED: phytosulfokines-like [Beta vulgaris subsp. vulgaris])	gi|18202915|sp|Q9FS10.1|PSK_ASPOF(RecName: Full=Phytosulfokines; Contains: RecName: Full=Phytosulfokine-alpha; Short=PSK-alpha; Short=Phytosulfokine-a; Contains: RecName: Full=Phytosulfokine-beta; Short=PSK-beta; Short=Phytosulfokine-b; Flags: Precursor)
Phn-m0281-5p	TRINITY_DN90647_c8_g1	1.8	1	22	1798	1819	ATTCAGTCTAAAAGAACATGGT	|||||||*||||||||||*||:	TAAGTCAAATTTTCTTGTCCCG					K04569	CCS		PF00403.23(HMA:Heavy-metal-associated domain); PF00080.17(Sod_Cu:Copper/zinc superoxide dismutase (SODC))	GO:0030001(biological_process:metal ion transport); GO:0043085(biological_process:positive regulation of catalytic activity); GO:0016532(molecular_function:superoxide dismutase copper chaperone activity); GO:0006801(biological_process:superoxide metabolic process); GO:0055114(biological_process:oxidation-reduction process)	gi|641844786|gb|KDO63678.1|( hypothetical protein CISIN_1g020436mg [Citrus sinensis])	gi|75263761|sp|Q9LD47.1|CCS_ARATH(RecName: Full=Copper chaperone for superoxide dismutase, chloroplastic/cytosolic; Short=AtCCS; AltName: Full=Superoxide dismutase copper chaperone; Flags: Precursor)
Phn-m0281-5p	TRINITY_DN92128_c5_g1	1.8	1	22	1587	1608	ATTCAGTCTAAAAGAACATGGT	*|||||||:|||||||||*||:	AAAGTCAGGTTTTCTTGTCCCG	COG2036(B:Chromatin structure and dynamics )		COG2036(Core component of nucleosome. Nucleosomes wrap and compact DNA into chromatin, limiting DNA accessibility to the cellular machineries which require DNA as a template. Histones thereby play a central role in transcription regulation, DNA repair, DNA replication and chromosomal stability. DNA accessibility is regulated via a complex set of post-translational modifications of histones, also …		K11253	H3		PF00125.21(Histone:Core histone H2A/H2B/H3/H4); PF15511.3(CENP-T_C:Centromere kinetochore component CENP-T histone fold); PF15630.3(CENP-S:CENP-S protein)	GO:0046982(molecular_function:protein heterodimerization activity); GO:0000786(cellular_component:nucleosome); GO:0016021(cellular_component:integral component of membrane); GO:0005634(cellular_component:nucleus); GO:0003677(molecular_function:DNA binding)	gi|604319816|gb|EYU30980.1|( hypothetical protein MIMGU_mgv1a014700mg [Erythranthe guttata])	gi|27734400|sp|P59169.2|H33_ARATH(RecName: Full=Histone H3.3; AltName: Full=Histone H3.2 >gi|54035960|sp|Q71V89.3|H33_GOSHI RecName: Full=Histone H3.3 >gi|59799551|sp|P69245.2|H33_LOLTE RecName: Full=Histone H3.3 >gi|59799580|sp|P69244.2|H33_MEDSA RecName: Full=Histone H3.3; AltName: Full=Histone H3.2; AltName: Full=Minor histone H3 >gi|73919839|sp|Q71H73.3|H33_VITVI RecName: Full=Histone H3.3 >g…
Phn-m0283-5p	TRINITY_DN85518_c0_g1	1.8	1	23	2690	2711	ATCAGATCGGTCAAAGCTCGGTG	||*||||||||||||||||:|*|	TAATCTAGCCAGTTTCGAGTC-C								PF13639.3(zf-RING_2:Ring finger domain); PF00097.22(zf-C3HC4:Zinc finger, C3HC4 type (RING finger)); PF13923.3(zf-C3HC4_2:Zinc finger, C3HC4 type (RING finger)); PF13445.3(zf-RING_UBOX:RING-type zinc-finger); PF14634.3(zf-RING_5:zinc-RING finger domain); PF14447.3(Prok-RING_4:Prokaryotic RING finger family 4); PF15227.3(zf-C3HC4_4:zinc finger of C3HC4-type, RING); PF12738.4(PTCB-BRCT:twin BRCT do…		gi|902235485|gb|KNA23936.1|( hypothetical protein SOVF_020900 [Spinacia oleracea])	gi|363548502|sp|O04251.3|Y4211_ARATH(RecName: Full=BRCT domain-containing protein At4g02110)
Phn-m0292-5p	TRINITY_DN92009_c0_g1	1.8	1	21	1812	1831	ACAGGATGTGTAAAAGCTGCC	|*|||||||||||||||*:||	TCTCCTACACATTTTCG-TGG		NOG140345(S:Function unknown )		NOG140345(Protein of unknown function DUF260)				PF03195.11(DUF260:Protein of unknown function DUF260)		gi|902150802|gb|KNA05456.1|( hypothetical protein SOVF_190130 [Spinacia oleracea])	gi|29427828|sp|Q8LBW3.2|LBD12_ARATH(RecName: Full=LOB domain-containing protein 12; AltName: Full=ASYMMETRIC LEAVES 2-like protein 5; Short=AS2-like protein 5)
Phn-m0301-3p	TRINITY_DN86567_c0_g1	1.8	1	22	235	256	CACGAGACACATAGCCAATGTG	||||||||||*:||||||||:|	GTGCTCTGTGCGTCGGTTACGC								PF01535.17(PPR:PPR repeat); PF13041.3(PPR_2:PPR repeat family); PF12854.4(PPR_1:PPR repeat); PF14432.3(DYW_deaminase:DYW family of nucleic acid deaminases); PF13812.3(PPR_3:Pentatricopeptide repeat domain); PF17177.1(PPR_long:Pentacotripeptide-repeat region of PROPR); PF13428.3(TPR_14:Tetratricopeptide repeat)	GO:0008270(molecular_function:zinc ion binding)	gi|731340036|ref|XP_010681168.1|( PREDICTED: putative pentatricopeptide repeat-containing protein At1g68930 [Beta vulgaris subsp. vulgaris])	gi|75333633|sp|Q9CAA8.1|PP108_ARATH(RecName: Full=Putative pentatricopeptide repeat-containing protein At1g68930)
Phn-m0301-3p	TRINITY_DN92358_c1_g1	1.8	1	22	870	891	CACGAGACACATAGCCAATGTG	|||||||||||:*|||||||:|	GTGCTCTGTGTGCCGGTTACGC					K02933	RP-L6, MRPL6, rplF	map03010(Ribosome)	PF00347.20(Ribosomal_L6:Ribosomal protein L6)	GO:0005840(cellular_component:ribosome); GO:0003735(molecular_function:structural constituent of ribosome); GO:0006412(biological_process:translation); GO:0019843(molecular_function:rRNA binding)	gi|729445255|ref|XP_010522339.1|( PREDICTED: 50S ribosomal protein L6, chloroplastic [Tarenaya hassleriana])	gi|75277355|sp|O23049.1|RK6_ARATH(RecName: Full=50S ribosomal protein L6, chloroplastic; AltName: Full=Protein EMBRYO DEFECTIVE 2394; Flags: Precursor)
Phn-m0011-3p	TRINITY_DN86211_c2_g3	2	1	22	1290	1312	ACGTAAACAACATGATAT-ATCG	|||||||||||*||||||*||*|	TGCATTTGTTGGACTATATTACC									GO:0003676(molecular_function:nucleic acid binding); GO:0016020(cellular_component:membrane)	gi|950969251|ref|XP_014499777.1|( PREDICTED: uncharacterized protein At2g34160-like [Vigna radiata var. radiata])	gi|73921087|sp|O22969.1|Y2416_ARATH(RecName: Full=Uncharacterized protein At2g34160)
Phn-m0011-3p	TRINITY_DN86831_c4_g3	2	1	22	5	26	ACGTAAACAACATGATATATCG	||||||||||**||||||||||	TGCATTTGTTCAACTATATAGC								PF02365.12(NAM:No apical meristem (NAM) protein)	GO:0006355(biological_process:regulation of transcription, DNA-templated); GO:0003677(molecular_function:DNA binding); GO:0005634(cellular_component:nucleus)	gi|731327297|ref|XP_010674451.1|( PREDICTED: NAC domain-containing protein 78-like [Beta vulgaris subsp. vulgaris])	gi|75173202|sp|Q9FY82.1|NAC82_ARATH(RecName: Full=NAC domain-containing protein 82; Short=ANAC082; AltName: Full=Protein VND-INTERACTING 1)
Phn-m0011-3p	TRINITY_DN86907_c2_g2	2	1	22	123	144	ACGTAAACAACATGATATATCG	|||||||||*||||||*|||||	TGCATTTGTAGTACTACATAGC		NOG10123(K:Transcription )		NOG10123(DNA binding protein GT-1)					GO:0006355(biological_process:regulation of transcription, DNA-templated); GO:0003700(molecular_function:transcription factor activity, sequence-specific DNA binding); GO:0003677(molecular_function:DNA binding); GO:0005634(cellular_component:nucleus)	gi|731343405|ref|XP_010682875.1|( PREDICTED: trihelix transcription factor GT-1 isoform X1 [Beta vulgaris subsp. vulgaris])	gi|75334447|sp|Q9FX53.1|TGT1_ARATH(RecName: Full=Trihelix transcription factor GT-1; AltName: Full=Trihelix DNA-binding protein GT-1)
Phn-m0011-3p	TRINITY_DN87238_c2_g1	2	1	22	1874	1895	ACGTAAACAACATGATATATCG	*|:||||||||||||||*|:|:	GGTATTTGTTGTACTATTTGGT								PF13460.3(NAD_binding_10:NAD(P)H-binding); PF05368.10(NmrA:NmrA-like family); PF00106.22(adh_short:short chain dehydrogenase); PF03435.15(Sacchrp_dh_NADP:Saccharopine dehydrogenase NADP binding domain); PF01073.16(3Beta_HSD:3-beta hydroxysteroid dehydrogenase/isomerase family)		gi|902232407|gb|KNA22602.1|( hypothetical protein SOVF_030940 [Spinacia oleracea])	gi|75248154|sp|Q8SKU2.2|TIC62_PEA(RecName: Full=Protein TIC 62, chloroplastic; AltName: Full=Translocon at the inner envelope membrane of chloroplasts 62; Short=PsTIC62; Flags: Precursor)
Phn-m0011-3p	TRINITY_DN87568_c2_g3	2	1	22	1116	1137	ACGTAAACAACATGATATATCG	|||||||||||*|||*||||||	TGCATTTGTTGGACTTTATAGC					K09422	MYBP		PF00249.28(Myb_DNA-binding:Myb-like DNA-binding domain); PF13921.3(Myb_DNA-bind_6:Myb-like DNA-binding domain)	GO:0003677(molecular_function:DNA binding)	gi|1005743107|gb|AMQ23629.1|( myb transcription factor 4 [Silene littorea])	gi|75317981|sp|O22264.1|MYB12_ARATH(RecName: Full=Transcription factor MYB12; AltName: Full=Myb-related protein 12; Short=AtMYB12)
Phn-m0011-3p	TRINITY_DN91152_c6_g3	2	1	22	722	743	ACGTAAACAACATGATATATCG	|||||||*|||*||||||||||	TGCATTTCTTGGACTATATAGC										gi|731363931|ref|XP_010693697.1|( PREDICTED: cell number regulator 6-like [Beta vulgaris subsp. vulgaris])	gi|332313337|sp|B6SGC5.1|CNR6_MAIZE(RecName: Full=Cell number regulator 6; AltName: Full=ZmCNR06)
Phn-m0011-3p	TRINITY_DN92548_c7_g1	2	1	22	5541	5562	ACGTAAACAACATGATATATCG	|||||||||||*||||*|||||	TGCATTTGTTGAACTACATAGC								PF00394.19(Cu-oxidase:Multicopper oxidase); PF07731.11(Cu-oxidase_2:Multicopper oxidase); PF00036.29(EF-hand_1:EF hand); PF13202.3(EF-hand_5:EF hand); PF13405.3(EF-hand_6:EF-hand domain); PF13499.3(EF-hand_7:EF-hand domain pair); PF13833.3(EF-hand_8:EF-hand domain pair); PF12763.4(EF-hand_4:Cytoskeletal-regulatory complex EF hand); PF10591.6(SPARC_Ca_bdg:Secreted protein acidic and rich in cystei…	GO:0016491(molecular_function:oxidoreductase activity); GO:0055114(biological_process:oxidation-reduction process); GO:0005507(molecular_function:copper ion binding)	gi|902173126|gb|KNA08226.1|( hypothetical protein SOVF_164390 [Spinacia oleracea])	gi|114268|sp|Q00624.1|ASOL_BRANA(RecName: Full=L-ascorbate oxidase homolog; Flags: Precursor)
Phn-m0011-3p	TRINITY_DN93240_c3_g3	2	1	22	3109	3130	ACGTAAACAACATGATATATCG	|||||||*||||||||*|||||	TGCATTTATTGTACTACATAGC									GO:0016020(cellular_component:membrane)	gi|731361607|ref|XP_010692449.1|( PREDICTED: uncharacterized protein LOC104905558 [Beta vulgaris subsp. vulgaris])	gi|75265802|sp|Q9SG80.1|ASD1_ARATH(RecName: Full=Alpha-L-arabinofuranosidase 1; Short=AtASD1; AltName: Full=Beta-D-xylosidase; Flags: Precursor)
Phn-m0013-3p	TRINITY_DN86245_c0_g2	2	1	22	310	331	ACGTAAACAAATGACTGGAACG	|||||||||||||||*||*|*|	TGCATTTGTTTACTGCCCCTAC	COG0288(P:Inorganic ion transport and metabolism )		COG0288(carbonic anhydrase)		K01673	cynT, can	map00910(Nitrogen metabolism)	PF00484.16(Pro_CA:Carbonic anhydrase)	GO:0008270(molecular_function:zinc ion binding); GO:0004089(molecular_function:carbonate dehydratase activity); GO:0015976(biological_process:carbon utilization)	gi|902201553|gb|KNA14008.1|( hypothetical protein SOVF_111420 [Spinacia oleracea])	gi|75306365|sp|Q94CE3.1|BCA5_ARATH(RecName: Full=Beta carbonic anhydrase 5, chloroplastic; Short=AtbCA5; Short=AtbetaCA5; AltName: Full=Beta carbonate dehydratase 5; Flags: Precursor)
Phn-m0013-3p	TRINITY_DN87408_c3_g3	2	1	22	3289	3310	ACGTAAACAAATGACTGGAACG	||||||||||||||**||||||	TGCATTTGTTTACTTCCCTTGC								PF14559.3(TPR_19:Tetratricopeptide repeat); PF07719.14(TPR_2:Tetratricopeptide repeat); PF00515.25(TPR_1:Tetratricopeptide repeat); PF13428.3(TPR_14:Tetratricopeptide repeat); PF13424.3(TPR_12:Tetratricopeptide repeat); PF09976.6(TPR_21:Tetratricopeptide repeat-like domain); PF12895.4(ANAPC3:Anaphase-promoting complex, cyclosome, subunit 3)		gi|731320746|ref|XP_010670977.1|( PREDICTED: uncharacterized protein LOC104887900 isoform X1 [Beta vulgaris subsp. vulgaris])	gi|34223742|sp|Q9ULT0.3|TTC7A_HUMAN(RecName: Full=Tetratricopeptide repeat protein 7A; Short=TPR repeat protein 7A)
Phn-m0013-3p	TRINITY_DN88267_c2_g3	2	1	22	399	420	ACGTAAACAAATGACTGGAACG	*|:|||||||||:||:||||||	AGTATTTGTTTATTGGCCTTGC					K16302	CNNM		PF01595.17(DUF21:Domain of unknown function DUF21); PF00571.25(CBS:CBS domain)	GO:0016021(cellular_component:integral component of membrane)	gi|902191099|gb|KNA11763.1|( hypothetical protein SOVF_132100 isoform A [Spinacia oleracea])	gi|75253981|sp|Q67XQ0.1|Y4424_ARATH(RecName: Full=DUF21 domain-containing protein At4g14240; AltName: Full=CBS domain-containing protein CBSDUF1)
Phn-m0018-5p	TRINITY_DN87057_c8_g1	2	1	24	256	279	AATCCAGTCCAGATCCAATGGATC	|||||*:||||||||||*||||||	TTAGGATAGGTCTAGGTAACCTAG								PF00067.19(p450:Cytochrome P450)		gi|731368181|ref|XP_010696000.1|( PREDICTED: (+)-menthofuran synthase-like [Beta vulgaris subsp. vulgaris])	gi|13878399|sp|Q9STK7.1|C71AQ_ARATH(RecName: Full=Cytochrome P450 71A26)
Phn-m0019-3p	TRINITY_DN89268_c3_g1	2	1	24	147	170	AGGGTGATATCGAGACTCGGTACC	*|||||||||||||*|||||*|||	GCCCACTATAGCTCAGAGCCTTGG								PF03171.17(2OG-FeII_Oxy:2OG-Fe(II) oxygenase superfamily); PF14226.3(DIOX_N:non-haem dioxygenase in morphine synthesis N-terminal)		gi|902237995|gb|KNA25000.1|( hypothetical protein SOVF_010500 [Spinacia oleracea])	gi|75297894|sp|Q84MB3.1|ACCH1_ARATH(RecName: Full=1-aminocyclopropane-1-carboxylate oxidase homolog 1)
Phn-m0019-3p	TRINITY_DN91870_c3_g1	2	1	24	1811	1834	AGGGTGATATCGAGACTCGGTACC	||||||*|||||||*|||||||||	TCCCACCATAGCTCAGAGCCATGG					K08472	MLO		PF03094.12(Mlo:Mlo family)	GO:0006952(biological_process:defense response); GO:0005886(cellular_component:plasma membrane)	gi|590701734|ref|XP_007046462.1|( Seven transmembrane MLO family protein [Theobroma cacao])	gi|33112636|sp|O22757.2|MLO8_ARATH(RecName: Full=MLO-like protein 8; Short=AtMlo8)
Phn-m0019-3p	TRINITY_DN92454_c0_g1	2	1	24	4838	4861	AGGGTGATATCGAGACTCGGTACC	||:||||||*|||||||||||*||	TCTCACTATTGCTCTGAGCCAAGG	COG0842(V:Defense mechanisms )		COG0842((ABC) transporter)					PF01061.21(ABC2_membrane:ABC-2 type transporter); PF00005.24(ABC_tran:ABC transporter); PF08370.8(PDR_assoc:Plant PDR ABC transporter associated); PF13304.3(AAA_21:AAA domain, putative AbiEii toxin, Type IV TA system); PF13481.3(AAA_25:AAA domain); PF14510.3(ABC_trans_N:ABC-transporter extracellular N-terminal); PF13191.3(AAA_16:AAA ATPase domain); PF13555.3(AAA_29:P-loop containing region of AAA…	GO:0016887(molecular_function:ATPase activity); GO:0006810(biological_process:transport); GO:0005524(molecular_function:ATP binding); GO:0016021(cellular_component:integral component of membrane)	gi|902177167|gb|KNA08910.1|( hypothetical protein SOVF_158430 [Spinacia oleracea])	gi|75328829|sp|Q8GU89.1|AB37G_ORYSJ(RecName: Full=ABC transporter G family member 37; Short=OsABCG37; AltName: Full=Pleiotropic drug resistance protein 8; Short=OsPDR8)
Phn-m0024-3p	TRINITY_DN83550_c0_g1	2	1	21	1540	1559	TTTTGAACAATGTATACAACT	||||||||||||:|||*|*||	AAAACTTGTTACGTAT-TGGA					K15178	RTF1		PF03126.15(Plus-3:Plus-3 domain)		gi|731324894|ref|XP_010673218.1|( PREDICTED: RNA polymerase-associated protein C651.09c-like [Beta vulgaris subsp. vulgaris])	gi|75169645|sp|Q9C950.1|VIP5_ARATH(RecName: Full=Protein RTF1 homolog; AltName: Full=Protein VERNALIZATION INDEPENDENCE 5)
Phn-m0024-3p	TRINITY_DN87773_c0_g1	2	1	21	1282	1302	TTTTGAACAATGTATACAACT	|||||||||||:||:|*||||	AAAACTTGTTATATGTTTTGA								PF01061.21(ABC2_membrane:ABC-2 type transporter)	GO:0016021(cellular_component:integral component of membrane); GO:0016887(molecular_function:ATPase activity); GO:0005524(molecular_function:ATP binding)	gi|731330332|ref|XP_010676075.1|( PREDICTED: ABC transporter G family member 26 [Beta vulgaris subsp. vulgaris])	gi|374095361|sp|Q9LK50.2|AB26G_ARATH(RecName: Full=ABC transporter G family member 26; Short=ABC transporter ABCG.26; Short=AtABCG26; AltName: Full=Putative white-brown complex homolog protein 27; Short=AtWBC27)
Phn-m0024-3p	TRINITY_DN88918_c5_g1	2	1	21	293	313	TTTTGAACAATGTATACAACT	|||||||*|||*|||||||||	AAAACTTTTTAAATATGTTGA									GO:0008536(molecular_function:Ran GTPase binding); GO:0005622(cellular_component:intracellular); GO:0006886(biological_process:intracellular protein transport)	gi|731331669|ref|XP_010676781.1|( PREDICTED: importin-11 isoform X2 [Beta vulgaris subsp. vulgaris])	gi|50401062|sp|Q8K2V6.1|IPO11_MOUSE(RecName: Full=Importin-11; Short=Imp11; AltName: Full=Ran-binding protein 11; Short=RanBP11)
Phn-m0024-3p	TRINITY_DN89071_c0_g1	2	1	21	1684	1705	TTTTGAACAATGTATACAA-CT	|||||||*|||:|||||||*||	AAAACTTTTTATATATGTTAGA	COG0077(E:Amino acid transport and metabolism )		COG0077(Prephenate dehydratase)		K05359	ADT, PDT	map00400(Phenylalanine, tyrosine and tryptophan biosynthesis)	PF00800.15(PDT:Prephenate dehydratase)	GO:0047769(molecular_function:arogenate dehydratase activity); GO:0004106(molecular_function:chorismate mutase activity); GO:0009094(biological_process:L-phenylalanine biosynthetic process); GO:0004664(molecular_function:prephenate dehydratase activity); GO:0009570(cellular_component:chloroplast stroma); GO:0016597(molecular_function:amino acid binding)	gi|731355990|ref|XP_010689433.1|( PREDICTED: arogenate dehydratase/prephenate dehydratase 2, chloroplastic-like [Beta vulgaris subsp. vulgaris])	gi|75266257|sp|Q9SSE7.1|AROD2_ARATH(RecName: Full=Arogenate dehydratase/prephenate dehydratase 2, chloroplastic; Short=AtADT2; Short=AtPDT2; Flags: Precursor)
Phn-m0029-3p	TRINITY_DN88383_c2_g1	2	1	24	1289	1312	AACGGGAATCTTGTGACCATTATT	||*||||*||||||||||||||||	TTACCCTAAGAACACTGGTAATAA					K19355	MAN	map00051(Fructose and mannose metabolism)		GO:0016021(cellular_component:integral component of membrane); GO:0005975(biological_process:carbohydrate metabolic process); GO:0004553(molecular_function:hydrolase activity, hydrolyzing O-glycosyl compounds)	gi|870852285|gb|KMT04224.1|( hypothetical protein BVRB_8g185180 [Beta vulgaris subsp. vulgaris])	gi|125951640|sp|Q0DCM5.2|MAN6_ORYSJ(RecName: Full=Mannan endo-1,4-beta-mannosidase 6; AltName: Full=Beta-mannanase 6; AltName: Full=Endo-beta-1,4-mannanase 6; AltName: Full=OsMAN6; Flags: Precursor)
Phn-m0032-5p	TRINITY_DN89027_c1_g1	2	1	24	68	90	ACTAGGGCCCAGTTCTTTTGGAAC	||||:|||||*||||||||*||||	TGATTCCGGGACAAGAAAA-CTTG		NOG04274(R:General function prediction only )		NOG04274(dolichyl-diphosphooligosaccharide-protein glycosyltransferase subunit)	K12666	OST1, RPN1	map00510(N-Glycan biosynthesis); map04141(Protein processing in endoplasmic reticulum)	PF04597.11(Ribophorin_I:Ribophorin I)	GO:0005789(cellular_component:endoplasmic reticulum membrane); GO:0006486(biological_process:protein glycosylation); GO:0016021(cellular_component:integral component of membrane); GO:0004579(molecular_function:dolichyl-diphosphooligosaccharide-protein glycotransferase activity)	gi|902155338|gb|KNA05890.1|( hypothetical protein SOVF_186180 [Spinacia oleracea])	gi|75272069|sp|Q9ZUA0.1|OST1B_ARATH(RecName: Full=Dolichyl-diphosphooligosaccharide--protein glycosyltransferase subunit 1B; AltName: Full=Ribophorin IB; Short=RPN-IB; AltName: Full=Ribophorin-1B; Flags: Precursor)
Phn-m0032-5p	TRINITY_DN89060_c0_g2	2	1	24	383	405	ACTAGGGCCCAGTTCTTTTGGAAC	||||:|||||*||||||||*||||	TGATTCCGGGGCAAGAAAA-CTTG					K01535	PMA1, PMA2	map00190(Oxidative phosphorylation)		GO:0008553(molecular_function:hydrogen-exporting ATPase activity, phosphorylative mechanism); GO:0046872(molecular_function:metal ion binding); GO:0006754(biological_process:ATP biosynthetic process); GO:0016021(cellular_component:integral component of membrane); GO:1902600(biological_process:hydrogen ion transmembrane transport); GO:0005524(molecular_function:ATP binding)	gi|743809639|ref|XP_010928676.1|( PREDICTED: plasma membrane ATPase-like [Elaeis guineensis])	gi|416664|sp|Q03194.1|PMA4_NICPL(RecName: Full=Plasma membrane ATPase 4; AltName: Full=Proton pump 4)
Phn-m0037-5p	TRINITY_DN90980_c2_g2	2	1	24	114	136	AATGAGGAGATGAGATTCGAACAT	|||:|||||||||:||||*|*|||	TTATTCCTCTACTTTAAG-TAGTA					K07964	HPSE	map00531(Glycosaminoglycan degradation)	PF03662.11(Glyco_hydro_79n:Glycosyl hydrolase family 79, N-terminal domain)		gi|731354166|ref|XP_010688437.1|( PREDICTED: heparanase-like protein 3 [Beta vulgaris subsp. vulgaris])	gi|77416510|sp|Q9FZP1.2|HPSE3_ARATH(RecName: Full=Heparanase-like protein 3; Flags: Precursor)
Phn-m0041-5p	TRINITY_DN92197_c1_g1	2	1	21	135	154	TGAATGATCCTGATCACGAAG	|||||*||||||||||*||||	ACTTAGTAGGACTAGT-CTTC		NOG27572(S:Function unknown )		NOG27572(ER membrane protein complex subunit 4)				PF06417.9(DUF1077:Protein of unknown function (DUF1077))	GO:0016021(cellular_component:integral component of membrane)	gi|661872804|emb|CDP21110.1|( unnamed protein product [Coffea canephora])	gi|82184727|sp|Q6GR43.1|EMC4_XENLA(RecName: Full=ER membrane protein complex subunit 4; AltName: Full=Transmembrane protein 85 [Xenopus laevis])
Phn-m0046-5p	TRINITY_DN86665_c2_g1	2	1	24	77	100	GAAATCCATATCCAGATCCAATGG	|*||||||||||||||||*||*||	CCTTAGGTATAGGTCTAGTTTTCC					K14497	PP2C	map04016(MAPK signaling pathway - plant); map04075(Plant hormone signal transduction)	PF00481.18(PP2C:Protein phosphatase 2C)	GO:0004721(molecular_function:phosphoprotein phosphatase activity); GO:0043169(molecular_function:cation binding)	gi|902180287|gb|KNA09519.1|( hypothetical protein SOVF_152860 isoform B [Spinacia oleracea])	gi|75286811|sp|Q5SN75.1|P2C08_ORYSJ(RecName: Full=Probable protein phosphatase 2C 8; Short=OsPP2C08)
Phn-m0046-5p	TRINITY_DN86665_c5_g1	2	1	24	36	59	GAAATCCATATCCAGATCCAATGG	|*||||||||||||:||*||||||	CCTTAGGTATAGGTTTAAGTTACC	COG0317(K:Transcription); COG0317(T:Signal transduction mechanisms)		COG0317(In eubacteria ppGpp (guanosine 3'-diphosphate 5-' diphosphate) is a mediator of the stringent response that coordinates a variety of cellular activities in response to changes in nutritional abundance (By similarity)); COG0317(In eubacteria ppGpp (guanosine 3'-diphosphate 5-' diphosphate) is a mediator of the stringent response that coordinates a variety of cellular activities in response…					PF04607.14(RelA_SpoT:Region found in RelA / SpoT proteins); PF13328.3(HD_4:HD domain); PF02824.18(TGS:TGS domain)	GO:0008893(molecular_function:guanosine-3',5'-bis(diphosphate) 3'-diphosphatase activity); GO:0008728(molecular_function:GTP diphosphokinase activity); GO:0042594(biological_process:response to starvation); GO:0009507(cellular_component:chloroplast); GO:0015969(biological_process:guanosine tetraphosphate metabolic process)	gi|870865669|gb|KMT16719.1|( hypothetical protein BVRB_3g050030 [Beta vulgaris subsp. vulgaris])	gi|75213440|sp|Q9SYH1.1|RSH3C_ARATH(RecName: Full=Probable GTP diphosphokinase RSH3, chloroplastic; AltName: Full=RelA/SpoT homolog 3; Short=AtRSH3; AltName: Full=ppGpp synthetase RSH3; Flags: Precursor)
Phn-m0051-3p	TRINITY_DN87091_c1_g2	2	1	21	562	582	CGCCAAAGAAGACTTGCCCTG	||||||||||:||*||||*||	GCGGTTTCTTTTGTACGGTAC		NOG30158(U:Intracellular trafficking, secretion, and vesicular transport )		NOG30158(Cytochrome)	K08360	CYB561		PF03188.13(Cytochrom_B561:Eukaryotic cytochrome b561)	GO:0016021(cellular_component:integral component of membrane); GO:0055114(biological_process:oxidation-reduction process)	gi|731315654|ref|XP_010692471.1|( PREDICTED: probable transmembrane ascorbate ferrireductase 2 isoform X1 [Beta vulgaris subsp. vulgaris])	gi|75213127|sp|Q9SWS1.1|ACFR2_ARATH(RecName: Full=Probable transmembrane ascorbate ferrireductase 2; AltName: Full=Cytochrome b561-1; Short=Artb561-2; Short=AtCytb561; AltName: Full=Protein b561A.tha4)
Phn-m0051-5p	TRINITY_DN79895_c0_g1	2	1	21	113	133	GGGCAGTTCTTCTTTGGCAGA	||||||||||||||::|||**	CCCGTCAAGAAGAAGTCGTGG					K12812	UAP56, BAT1, SUB2	map03013(RNA transport); map03015(mRNA surveillance pathway); map03040(Spliceosome)	PF00270.26(DEAD:DEAD/DEAH box helicase); PF14617.3(CMS1:U3-containing 90S pre-ribosomal complex subunit)	GO:0010501(biological_process:RNA secondary structure unwinding); GO:0003723(molecular_function:RNA binding); GO:0004004(molecular_function:ATP-dependent RNA helicase activity); GO:0005681(cellular_component:spliceosomal complex); GO:0010468(biological_process:regulation of gene expression); GO:0000398(biological_process:mRNA splicing, via spliceosome); GO:0005524(molecular_function:ATP binding);…	gi|147769174|emb|CAN76234.1|( hypothetical protein VITISV_030204 [Vitis vinifera])	gi|61217662|sp|Q9Z1N5.1|DX39B_MOUSE(RecName: Full=Spliceosome RNA helicase Ddx39b; AltName: Full=56 kDa U2AF65-associated protein; AltName: Full=DEAD box protein UAP56; AltName: Full=HLA-B-associated transcript 1 protein >gi|61252099|sp|Q63413.3|DX39B_RAT RecName: Full=Spliceosome RNA helicase Ddx39b; AltName: Full=56 kDa U2AF65-associated protein; AltName: Full=ATP-dependent RNA helicase p47; Al…
Phn-m0052-3p	TRINITY_DN87091_c1_g2	2	1	21	562	582	CGCCAAAGAAGACTTGCCCTG	||||||||||:||*||||*||	GCGGTTTCTTTTGTACGGTAC		NOG30158(U:Intracellular trafficking, secretion, and vesicular transport )		NOG30158(Cytochrome)	K08360	CYB561		PF03188.13(Cytochrom_B561:Eukaryotic cytochrome b561)	GO:0016021(cellular_component:integral component of membrane); GO:0055114(biological_process:oxidation-reduction process)	gi|731315654|ref|XP_010692471.1|( PREDICTED: probable transmembrane ascorbate ferrireductase 2 isoform X1 [Beta vulgaris subsp. vulgaris])	gi|75213127|sp|Q9SWS1.1|ACFR2_ARATH(RecName: Full=Probable transmembrane ascorbate ferrireductase 2; AltName: Full=Cytochrome b561-1; Short=Artb561-2; Short=AtCytb561; AltName: Full=Protein b561A.tha4)
Phn-m0052-5p	TRINITY_DN79895_c0_g1	2	1	21	113	133	GGGCAGTTCTTCTTTGGCAGA	||||||||||||||::|||**	CCCGTCAAGAAGAAGTCGTGG					K12812	UAP56, BAT1, SUB2	map03013(RNA transport); map03015(mRNA surveillance pathway); map03040(Spliceosome)	PF00270.26(DEAD:DEAD/DEAH box helicase); PF14617.3(CMS1:U3-containing 90S pre-ribosomal complex subunit)	GO:0010501(biological_process:RNA secondary structure unwinding); GO:0003723(molecular_function:RNA binding); GO:0004004(molecular_function:ATP-dependent RNA helicase activity); GO:0005681(cellular_component:spliceosomal complex); GO:0010468(biological_process:regulation of gene expression); GO:0000398(biological_process:mRNA splicing, via spliceosome); GO:0005524(molecular_function:ATP binding);…	gi|147769174|emb|CAN76234.1|( hypothetical protein VITISV_030204 [Vitis vinifera])	gi|61217662|sp|Q9Z1N5.1|DX39B_MOUSE(RecName: Full=Spliceosome RNA helicase Ddx39b; AltName: Full=56 kDa U2AF65-associated protein; AltName: Full=DEAD box protein UAP56; AltName: Full=HLA-B-associated transcript 1 protein >gi|61252099|sp|Q63413.3|DX39B_RAT RecName: Full=Spliceosome RNA helicase Ddx39b; AltName: Full=56 kDa U2AF65-associated protein; AltName: Full=ATP-dependent RNA helicase p47; Al…
Phn-m0057-5p	TRINITY_DN89508_c3_g2	2	1	22	1829	1850	TAGGAAGAAGGCTGTGTATAGG	*|||||:|||||||:|||||*|	CTCCTTTTTCCGACGCATATAC		NOG75799(S:Function unknown )		NOG75799(Uncharacterized conserved protein (DUF2358))					GO:0016021(cellular_component:integral component of membrane); GO:0009507(cellular_component:chloroplast)	gi|731326208|ref|XP_010673903.1|( PREDICTED: uncharacterized protein LOC104890207 [Beta vulgaris subsp. vulgaris])	gi|118572746|sp|Q9S9K4.2|ASPL2_ARATH(RecName: Full=Aspartic proteinase-like protein 2; Flags: Precursor)
Phn-m0058-3p	TRINITY_DN87760_c0_g4	2	1	24	2072	2095	GTTCTATGGTAAGACTGTTTTATC	||||||:||||||||:|::||||*	CAAGATGCCATTCTGGCGGAATAT					K02218	CSNK1, CKI		PF00069.22(Pkinase:Protein kinase domain); PF07714.14(Pkinase_Tyr:Protein tyrosine kinase); PF01636.20(APH:Phosphotransferase enzyme family)	GO:0018105(biological_process:peptidyl-serine phosphorylation); GO:0004674(molecular_function:protein serine/threonine kinase activity); GO:0008360(biological_process:regulation of cell shape); GO:0005524(molecular_function:ATP binding); GO:0016055(biological_process:Wnt signaling pathway); GO:0006897(biological_process:endocytosis); GO:0005737(cellular_component:cytoplasm); GO:0005634(cellular_c…	gi|731348165|ref|XP_010685356.1|( PREDICTED: casein kinase I isoform delta-like [Beta vulgaris subsp. vulgaris])	gi|27735206|sp|P42158.2|KC1D_ARATH(RecName: Full=Casein kinase I isoform delta-like; Short=CKI-delta)
Phn-m0060-5p	TRINITY_DN92772_c2_g1	2	1	23	233	255	ATACGAATTTCCGGATATCCGAT	||||:||||||||*||||*||||	TATGTTTAAAGGCATATATGCTA					K14709	SLC39A1_2_3, ZIP1_2_3		PF02535.19(Zip:ZIP Zinc transporter)	GO:0071577(biological_process:zinc II ion transmembrane transport); GO:0005886(cellular_component:plasma membrane); GO:0016021(cellular_component:integral component of membrane); GO:0005385(molecular_function:zinc ion transmembrane transporter activity)	gi|731359587|ref|XP_010691362.1|( PREDICTED: zinc transporter 1-like [Beta vulgaris subsp. vulgaris])	gi|37090176|sp|O81123.1|ZIP1_ARATH(RecName: Full=Zinc transporter 1; AltName: Full=ZRT/IRT-like protein 1; Flags: Precursor)
Phn-m0069-3p	TRINITY_DN86457_c3_g1	2	1	23	259	281	AAACAACCTGATGTATCGGAGGG	||||||*||:||||||||||||*	TTTGTTTGATTACATAGCCTCCA					K02960	RP-S16e, RPS16	map03010(Ribosome)			gi|695007501|ref|XP_009390299.1|( PREDICTED: 40S ribosomal protein S16 [Musa acuminata subsp. malaccensis])	gi|133808|sp|P16149.1|RS16_LUPPO(RecName: Full=40S ribosomal protein S16)
Phn-m0069-3p	TRINITY_DN87568_c2_g3	2	1	23	1111	1133	AAACAACCTGATGTATCGGAGGG	|||||||||||*:|||||||::|	TTTGTTGGACTTTATAGCCTTTC					K09422	MYBP		PF00249.28(Myb_DNA-binding:Myb-like DNA-binding domain); PF13921.3(Myb_DNA-bind_6:Myb-like DNA-binding domain)	GO:0003677(molecular_function:DNA binding)	gi|1005743107|gb|AMQ23629.1|( myb transcription factor 4 [Silene littorea])	gi|75317981|sp|O22264.1|MYB12_ARATH(RecName: Full=Transcription factor MYB12; AltName: Full=Myb-related protein 12; Short=AtMYB12)
Phn-m0069-3p	TRINITY_DN87725_c0_g3	2	1	23	3143	3165	AAACAACCTGATGTATCGGAGGG	||||||*||*|||||||||||||	TTTGTTAGAATACATAGCCTCCC		NOG33240(S:Function unknown )		NOG33240()					GO:0008236(molecular_function:serine-type peptidase activity); GO:0016020(cellular_component:membrane); GO:0006508(biological_process:proteolysis)	gi|902179297|gb|KNA09325.1|( hypothetical protein SOVF_154700 isoform B [Spinacia oleracea])	gi|81903593|sp|Q9CQU8.1|IMP1L_MOUSE(RecName: Full=Mitochondrial inner membrane protease subunit 1; AltName: Full=IMP1-like protein)
Phn-m0069-3p	TRINITY_DN88196_c2_g3	2	1	23	611	633	AAACAACCTGATGTATCGGAGGG	||||||||||*||||||:|||:*	TTTGTTGGACCACATAGTCTCTA										gi|731414504|ref|XP_010659165.1|( PREDICTED: uridine 5'-monophosphate synthase [Vitis vinifera])	gi|2499946|sp|Q42942.1|UMPS_TOBAC(RecName: Full=Uridine 5'-monophosphate synthase; Short=UMP synthase; Includes: RecName: Full=Orotate phosphoribosyltransferase; Short=OPRTase; Includes: RecName: Full=Orotidine 5'-phosphate decarboxylase; AltName: Full=OMPdecase)
Phn-m0069-3p	TRINITY_DN89265_c0_g1	2	1	23	843	865	AAACAACCTGATGTATCGGAGGG	||||||**|||||||||||||||	TTTGTTTTACTACATAGCCTCCC								PF04241.12(DUF423:Protein of unknown function (DUF423))	GO:0016021(cellular_component:integral component of membrane)	gi|902200983|gb|KNA13870.1|( hypothetical protein SOVF_112670 [Spinacia oleracea])	gi|114154860|sp|Q4L3Q9.2|Y2409_STAHJ(RecName: Full=UPF0382 membrane protein SH2409)
Phn-m0069-3p	TRINITY_DN89588_c6_g2	2	1	23	1361	1383	AAACAACCTGATGTATCGGAGGG	||||||*|||||||||||:||:*	TTTGTTAGACTACATAGCTTCTA					K00588	E2.1.1.104	map00940(Phenylpropanoid biosynthesis); map00941(Flavonoid biosynthesis); map00360(Phenylalanine metabolism); map00945(Stilbenoid, diarylheptanoid and gingerol biosynthesis)		GO:0008171(molecular_function:O-methyltransferase activity); GO:0032259(biological_process:methylation)	gi|902155639|gb|KNA05927.1|( hypothetical protein SOVF_185800 [Spinacia oleracea])	gi|510791478|sp|C7AE94.1|FAOMT_VITVI(RecName: Full=Flavonoid 3',5'-methyltransferase; AltName: Full=Anthocyanin-O-methyltransferase; Short=VvAOMT)
Phn-m0069-3p	TRINITY_DN89645_c0_g3	2	1	23	117	139	AAACAACCTGATGTATCGGAGGG	||*|||||||||||||||:||:*	TTAGTTGGACTACATAGCTTCTA								PF00857.17(Isochorismatase:Isochorismatase family)	GO:0003824(molecular_function:catalytic activity); GO:0008152(biological_process:metabolic process)	gi|902184620|gb|KNA10329.1|( hypothetical protein SOVF_145390 [Spinacia oleracea])	gi|75160437|sp|Q8S8F9.1|NIC1_ARATH(RecName: Full=Nicotinamidase 1; Short=AtNIC1; AltName: Full=Nicotine deamidase 1)
Phn-m0069-3p	TRINITY_DN89897_c2_g1	2	1	23	166	188	AAACAACCTGATGTATCGGAGGG	||||||||:|||||*||:||:||	TTTGTTGGGCTACAGAGTCTTCC					K13448	CML	map04626(Plant-pathogen interaction)	PF00036.29(EF-hand_1:EF hand); PF13202.3(EF-hand_5:EF hand); PF13405.3(EF-hand_6:EF-hand domain); PF13499.3(EF-hand_7:EF-hand domain pair); PF13833.3(EF-hand_8:EF-hand domain pair); PF10591.6(SPARC_Ca_bdg:Secreted protein acidic and rich in cysteine Ca binding region); PF12763.4(EF-hand_4:Cytoskeletal-regulatory complex EF hand); PF14658.3(EF-hand_9:EF-hand domain); PF01575.16(MaoC_dehydratas:Mao…	GO:0005509(molecular_function:calcium ion binding)	gi|731375730|ref|XP_010667348.1|( PREDICTED: calmodulin-like protein 1 [Beta vulgaris subsp. vulgaris])	gi|75338852|sp|Q9ZQE6.1|CML1_ARATH(RecName: Full=Calmodulin-like protein 1)
Phn-m0069-3p	TRINITY_DN90017_c3_g1	2	1	23	2996	3018	AAACAACCTGATGTATCGGAGGG	||||*||||:|||||||||||*|	TTTGATGGATTACATAGCCTCAC										gi|731311172|ref|XP_010692909.1|( PREDICTED: vegetative cell wall protein gp1 isoform X1 [Beta vulgaris subsp. vulgaris])	gi|613505134|sp|Q9H321.4|VCX3B_HUMAN(RecName: Full=Variable charge X-linked protein 3B; AltName: Full=Variably charged protein X-C; Short=VCX-C)
Phn-m0069-3p	TRINITY_DN90668_c5_g1	2	1	23	455	477	AAACAACCTGATGTATCGGAGGG	||||||||||||||*|||||::*	TTTGTTGGACTACACAGCCTTTA					K00011	AKR1B	map00561(Glycerolipid metabolism); map00040(Pentose and glucuronate interconversions); map00051(Fructose and mannose metabolism); map00052(Galactose metabolism)			gi|697146391|ref|XP_009627345.1|( PREDICTED: NADP-dependent D-sorbitol-6-phosphate dehydrogenase-like, partial [Nicotiana tomentosiformis])	gi|134153|sp|P28475.1|S6PD_MALDO(RecName: Full=NADP-dependent D-sorbitol-6-phosphate dehydrogenase; AltName: Full=Aldose-6-phosphate reductase [NADPH]; AltName: Full=NADP-S6PDH)
Phn-m0069-3p	TRINITY_DN90759_c4_g6	2	1	23	2495	2517	AAACAACCTGATGTATCGGAGGG	|||||||||:||:|||||*|*||	TTTGTTGGATTATATAGCGTGCC								PF02704.11(GASA:Gibberellin regulated protein); PF07727.11(RVT_2:Reverse transcriptase (RNA-dependent DNA polymerase))		gi|802550613|ref|XP_012093075.1|( PREDICTED: snakin-1 [Jatropha curcas])	gi|75164757|sp|Q948Z4.1|SNAK1_SOLTU(RecName: Full=Snakin-1; Flags: Precursor)
Phn-m0069-3p	TRINITY_DN91165_c0_g8	2	1	23	385	407	AAACAACCTGATGTATCGGAGGG	*|||||*|||||||||||*||||	CTTGTTAGACTACATAGCATCCC								PF12165.5(DUF3594:Domain of unknown function (DUF3594)); PF00628.26(PHD:PHD-finger)	GO:0046872(molecular_function:metal ion binding)	gi|902221836|gb|KNA19019.1|( hypothetical protein SOVF_065470 [Spinacia oleracea])	gi|75262387|sp|Q9FFF5.1|ALFL1_ARATH(RecName: Full=PHD finger protein ALFIN-LIKE 1; Short=Protein AL1)
Phn-m0069-3p	TRINITY_DN91276_c0_g2	2	1	23	15	37	AAACAACCTGATGTATCGGAGGG	|||*|||||||||||||*||||*	TTTATTGGACTACATAGGCTCCA								PF02458.12(Transferase:Transferase family)		gi|661887845|emb|CDP08578.1|( unnamed protein product [Coffea canephora])	gi|75136987|sp|Q70PR7.2|VINSY_RAUSE(RecName: Full=Vinorine synthase)
Phn-m0069-3p	TRINITY_DN92216_c2_g7	2	1	23	2434	2457	AAACAACCTGATGTATCG-GAGGG	||*||||||||||||||:*||||:	TTGGTTGGACTACATAGTTCTCCT		NOG01243(R:General function prediction only )		NOG01243(Ankyrin repeat and ibr domain containing)	K11968	ARIH1		PF01485.18(IBR:IBR domain, a half RING-finger domain); PF13923.3(zf-C3HC4_2:Zinc finger, C3HC4 type (RING finger)); PF13445.3(zf-RING_UBOX:RING-type zinc-finger); PF00097.22(zf-C3HC4:Zinc finger, C3HC4 type (RING finger)); PF13639.3(zf-RING_2:Ring finger domain); PF14634.3(zf-RING_5:zinc-RING finger domain)	GO:0016567(biological_process:protein ubiquitination); GO:0008270(molecular_function:zinc ion binding); GO:0004842(molecular_function:ubiquitin-protein transferase activity)	gi|731326159|ref|XP_010673879.1|( PREDICTED: probable E3 ubiquitin-protein ligase ARI8 isoform X1 [Beta vulgaris subsp. vulgaris])	gi|75328048|sp|Q84RR0.1|ARI7_ARATH(RecName: Full=Probable E3 ubiquitin-protein ligase ARI7; AltName: Full=ARIADNE-like protein ARI7; AltName: Full=Protein ariadne homolog 7)
Phn-m0069-3p	TRINITY_DN92252_c2_g1	2	1	23	3608	3630	AAACAACCTGATGTATCGGAGGG	|||||||*||||||||*||||||	TTTGTTGTACTACATAACCTCCC		NOG17832(S:Function unknown )		NOG17832(GDP-fucose protein O-fucosyltransferase)				PF10250.6(O-FucT:GDP-fucose protein O-fucosyltransferase)	GO:0016021(cellular_component:integral component of membrane)	gi|731362299|ref|XP_010692819.1|( PREDICTED: uncharacterized protein At1g04910 [Beta vulgaris subsp. vulgaris])	gi|75162430|sp|Q8W486.1|Y1491_ARATH(RecName: Full=Uncharacterized protein At1g04910)
Phn-m0069-3p	TRINITY_DN93240_c3_g3	2	1	23	3104	3126	AAACAACCTGATGTATCGGAGGG	|||*|||*|||||||||||||||	TTTATTGTACTACATAGCCTCCC									GO:0016020(cellular_component:membrane)	gi|731361607|ref|XP_010692449.1|( PREDICTED: uncharacterized protein LOC104905558 [Beta vulgaris subsp. vulgaris])	gi|75265802|sp|Q9SG80.1|ASD1_ARATH(RecName: Full=Alpha-L-arabinofuranosidase 1; Short=AtASD1; AltName: Full=Beta-D-xylosidase; Flags: Precursor)
Phn-m0074-5p	TRINITY_DN88753_c3_g4	2	1	24	120	143	AGGATCGGGATTCTACTTTGGATC	|||||||||||||||||*||**|*	TCCTAGCCCTAAGATGATACAAAC								PF07734.10(FBA_1:F-box associated)		gi|1009107215|ref|XP_015878507.1|( PREDICTED: F-box protein CPR30-like [Ziziphus jujuba])	gi|142989747|sp|Q9SU30.2|CPR30_ARATH(RecName: Full=F-box protein CPR30; AltName: Full=Protein CONSTITUTIVE EXPRESSER OF PR GENES 30)
Phn-m0077-5p	TRINITY_DN87013_c10_g1	2	1	24	384	407	ATCGACGCAATCTTCACCTTGGGT	|||||||*|||||||||||||**|	TAGCTGCATTAGAAGTGGAACAAA											gi|75025386|sp|Q9U281.3|H332_CAEEL(RecName: Full=Histone H3.3 type 2)
Phn-m0080-5p	TRINITY_DN85985_c0_g6	2	1	22	186	207	ACTCCATTTCATGACTGCTGAG	|||||||:||||||||:|:*|:	TGAGGTAGAGTACTGATGGATT								PF01151.15(ELO:GNS1/SUR4 family)	GO:0016020(cellular_component:membrane)	gi|902206326|gb|KNA15430.1|( hypothetical protein SOVF_098340 [Spinacia oleracea])	gi|75213501|sp|Q9SYY4.1|ELO3L_ARATH(RecName: Full=Elongation of fatty acids protein 3-like; Short=Protein ELO3-like; AltName: Full=Protein HIGH EXPRESSION OF OSMOTICALLY RESPONSIVE GENES 3; AltName: Full=Very long-chain fatty acid condensing enzyme HOS3; Short=VLCFA condensing enzyme HOS3)
Phn-m0082-3p	TRINITY_DN86347_c0_g3	2	1	22	2910	2931	AACGTGAACAATCTGATGTATC	|||||:|||||:||||:||||*	TTGCATTTGTTGGACTGCATAA								PF12906.4(RINGv:RING-variant domain); PF13639.3(zf-RING_2:Ring finger domain)	GO:0046872(molecular_function:metal ion binding); GO:0016020(cellular_component:membrane)	gi|902183095|gb|KNA10045.1|( hypothetical protein SOVF_148030 isoform B, partial [Spinacia oleracea])	gi|519889692|sp|F4JKK0.1|SUD1_ARATH(RecName: Full=Probable E3 ubiquitin ligase SUD1; AltName: Full=Protein ECERIFERUM 9; AltName: Full=Protein SUPPRESSOR OF DRY2 DEFFECTS 1; Short=AtSUD1; AltName: Full=RING/U-box domain-containing protein)
Phn-m0082-3p	TRINITY_DN86357_c7_g3	2	1	22	677	698	AACGTGAACAATCTGATGTATC	|||||:|||||:|||||||*|*	TTGCATTTGTTGGACTACAGAT		NOG22170(R:General function prediction only )		NOG22170(RING)				PF13920.3(zf-C3HC4_3:Zinc finger, C3HC4 type (RING finger)); PF13923.3(zf-C3HC4_2:Zinc finger, C3HC4 type (RING finger)); PF13424.3(TPR_12:Tetratricopeptide repeat); PF13639.3(zf-RING_2:Ring finger domain)	GO:0005634(cellular_component:nucleus); GO:0008270(molecular_function:zinc ion binding); GO:0005829(cellular_component:cytosol); GO:1902553(biological_process:positive regulation of catalase activity)	gi|731356722|ref|XP_010689828.1|( PREDICTED: uncharacterized protein LOC104903488 [Beta vulgaris subsp. vulgaris])	gi|82194968|sp|Q5FWP4.1|CHFR_XENLA(RecName: Full=E3 ubiquitin-protein ligase CHFR; AltName: Full=Checkpoint with forkhead and RING finger domains protein)
Phn-m0082-3p	TRINITY_DN86457_c3_g1	2	1	22	265	286	AACGTGAACAATCTGATGTATC	|||||:|||||*||:|||||||	TTGCATTTGTTTGATTACATAG					K02960	RP-S16e, RPS16	map03010(Ribosome)			gi|695007501|ref|XP_009390299.1|( PREDICTED: 40S ribosomal protein S16 [Musa acuminata subsp. malaccensis])	gi|133808|sp|P16149.1|RS16_LUPPO(RecName: Full=40S ribosomal protein S16)
Phn-m0082-3p	TRINITY_DN87725_c0_g3	2	1	22	3149	3170	AACGTGAACAATCTGATGTATC	|||:|:||||||||*|||||||	TTGTATTTGTTAGAATACATAG		NOG33240(S:Function unknown )		NOG33240()					GO:0008236(molecular_function:serine-type peptidase activity); GO:0016020(cellular_component:membrane); GO:0006508(biological_process:proteolysis)	gi|902179297|gb|KNA09325.1|( hypothetical protein SOVF_154700 isoform B [Spinacia oleracea])	gi|81903593|sp|Q9CQU8.1|IMP1L_MOUSE(RecName: Full=Mitochondrial inner membrane protease subunit 1; AltName: Full=IMP1-like protein)
Phn-m0082-3p	TRINITY_DN89162_c2_g1	2	1	22	3407	3428	AACGTGAACAATCTGATGTATC	|||||:|||*||||:|||||||	TTGCATTTGATAGATTACATAG								PF00190.19(Cupin_1:Cupin)		gi|731336115|ref|XP_010679084.1|( PREDICTED: vicilin-like antimicrobial peptides 2-3 [Beta vulgaris subsp. vulgaris])	gi|548900|sp|Q04672.1|SBP_SOYBN(RecName: Full=Sucrose-binding protein; Short=SBP; Flags: Precursor)
Phn-m0082-3p	TRINITY_DN89629_c1_g4	2	1	22	409	430	AACGTGAACAATCTGATGTATC	|||||:||*||:||||||||||	TTGCATTTCTTGGACTACATAG	COG5251(K:Transcription )		COG5251(TAF11 RNA polymerase II, TATA box binding protein (TBP)-associated factor)		K03135	TAF11	map03022(Basal transcription factors)	PF04719.11(TAFII28:hTAFII28-like protein conserved region)	GO:0005488(molecular_function:binding); GO:0044271(biological_process:cellular nitrogen compound biosynthetic process); GO:0034645(biological_process:cellular macromolecule biosynthetic process); GO:0010467(biological_process:gene expression); GO:0044238(biological_process:primary metabolic process)	gi|902186608|gb|KNA10728.1|( hypothetical protein SOVF_141620 [Spinacia oleracea])	gi|75264738|sp|Q9M565.1|TAF11_ARATH(RecName: Full=Transcription initiation factor TFIID subunit 11; AltName: Full=TBP-associated factor 11; Short=AtTAF11)
Phn-m0082-3p	TRINITY_DN89645_c0_g3	2	1	22	123	144	AACGTGAACAATCTGATGTATC	|||||:|*|||:||||||||||	TTGCATTAGTTGGACTACATAG								PF00857.17(Isochorismatase:Isochorismatase family)	GO:0003824(molecular_function:catalytic activity); GO:0008152(biological_process:metabolic process)	gi|902184620|gb|KNA10329.1|( hypothetical protein SOVF_145390 [Spinacia oleracea])	gi|75160437|sp|Q8S8F9.1|NIC1_ARATH(RecName: Full=Nicotinamidase 1; Short=AtNIC1; AltName: Full=Nicotine deamidase 1)
Phn-m0082-3p	TRINITY_DN90066_c3_g3	2	1	22	104	125	AACGTGAACAATCTGATGTATC	|||||:||||||*|||||*|||	TTGCATTTGTTAAACTACTTAG					K11275	H1_5		PF00538.16(Linker_histone:linker histone H1 and H5 family)	GO:0005694(cellular_component:chromosome)	gi|902192273|gb|KNA11997.1|( hypothetical protein SOVF_129790 [Spinacia oleracea])	gi|729668|sp|P40267.1|H1_SOLPN(RecName: Full=Histone H1)
Phn-m0082-3p	TRINITY_DN90092_c1_g3	2	1	22	1540	1561	AACGTGAACAATCTGATGTATC	|||||:|||*|:||||||||||	TTGCATTTGGTGGACTACATAG	COG5196(U:Intracellular trafficking, secretion, and vesicular transport )		COG5196(Required for the retention of luminal endoplasmic reticulum proteins. Determines the specificity of the luminal ER protein retention system. Also required for normal vesicular traffic through the Golgi (By similarity))		K10949	KDELR		PF00810.15(ER_lumen_recept:ER lumen protein retaining receptor)	GO:0046923(molecular_function:ER retention sequence binding); GO:0006621(biological_process:protein retention in ER lumen); GO:0016021(cellular_component:integral component of membrane); GO:0005783(cellular_component:endoplasmic reticulum)	gi|731368637|ref|XP_010696254.1|( PREDICTED: putative ER lumen protein-retaining receptor C28H8.4 [Beta vulgaris subsp. vulgaris])	gi|74906876|sp|Q611C8.1|ERD2_CAEBR(RecName: Full=ER lumen protein-retaining receptor)
Phn-m0082-3p	TRINITY_DN90101_c3_g2	2	1	22	1349	1370	AACGTGAACAATCTGATGTATC	|||||:||||||*|||||*|||	TTGCATTTGTTAAACTACTTAG								PF00657.19(Lipase_GDSL:GDSL-like Lipase/Acylhydrolase)		gi|1035928984|gb|OAY58571.1|( hypothetical protein MANES_02G189200 [Manihot esculenta])	gi|75169352|sp|Q9C7N4.1|GDL15_ARATH(RecName: Full=GDSL esterase/lipase At1g29670; AltName: Full=Extracellular lipase At1g29670; Flags: Precursor)
Phn-m0082-3p	TRINITY_DN90149_c3_g2	2	1	22	26	47	AACGTGAACAATCTGATGTATC	|||||:|||||:||*|||||||	TTGCATTTGTTGGAGTACATAG								PF13639.3(zf-RING_2:Ring finger domain); PF12861.4(zf-ANAPC11:Anaphase-promoting complex subunit 11 RING-H2 finger); PF12678.4(zf-rbx1:RING-H2 zinc finger domain); PF17123.2(zf-RING_11:RING-like zinc finger); PF13923.3(zf-C3HC4_2:Zinc finger, C3HC4 type (RING finger)); PF00097.22(zf-C3HC4:Zinc finger, C3HC4 type (RING finger)); PF13445.3(zf-RING_UBOX:RING-type zinc-finger)		gi|870851124|gb|KMT03190.1|( hypothetical protein BVRB_8g197390 [Beta vulgaris subsp. vulgaris])	gi|75317983|sp|O22283.1|RHC2A_ARATH(RecName: Full=Probable E3 ubiquitin-protein ligase RHC2A; AltName: Full=RING-H2 finger C2a; AltName: Full=RING-H2 zinc finger protein RHC2a)
Phn-m0082-3p	TRINITY_DN90376_c4_g2	2	1	22	1417	1437	AACGTGAACAATCTGATGTATC	|||:|:|||||:|||||*||||	TTGTATTTGTTGGACTA-ATAG		NOG128292(S:Function unknown )		NOG128292(thaumatin-like)				PF00314.14(Thaumatin:Thaumatin family)		gi|902205157|gb|KNA15106.1|( hypothetical protein SOVF_101300 [Spinacia oleracea])	gi|30316292|sp|Q9FSG7.1|TP1A_MALDO(RecName: Full=Thaumatin-like protein 1a; AltName: Full=Mdtl1; AltName: Full=Pathogenesis-related protein 5a; Short=PR-5a; AltName: Allergen=Mal d 2; Flags: Precursor)
Phn-m0082-3p	TRINITY_DN90759_c4_g3	2	1	22	1043	1064	AACGTGAACAATCTGATGTATC	|||||:|||||:*|||||||||	TTGCATTTGTTGTACTACATAG		NOG08754(S:Function unknown )		NOG08754(Family with sequence similarity 91, member A1)				PF14647.3(FAM91_N:FAM91 N-terminus); PF14648.3(FAM91_C:FAM91 C-terminus)		gi|731312672|ref|XP_010675835.1|( PREDICTED: protein FAM91A1 isoform X1 [Beta vulgaris subsp. vulgaris])	gi|123797490|sp|Q3UVG3.1|F91A1_MOUSE(RecName: Full=Protein FAM91A1)
Phn-m0082-3p	TRINITY_DN91141_c0_g1	2	1	22	1763	1784	AACGTGAACAATCTGATGTATC	|||||:|||||*|||||||||*	TTGCATTTGTTCGACTACATAA		NOG14484(R:General function prediction only )		NOG14484(mannosyl (beta-1,4-)-glycoprotein beta-1,4-N-acetylglucosaminyltransferase)	K00737	MGAT3	map00510(N-Glycan biosynthesis)	PF04724.10(Glyco_transf_17:Glycosyltransferase family 17)	GO:0003830(molecular_function:beta-1,4-mannosylglycoprotein 4-beta-N-acetylglucosaminyltransferase activity); GO:0016021(cellular_component:integral component of membrane); GO:0006487(biological_process:protein N-linked glycosylation)	gi|731342570|ref|XP_010682459.1|( PREDICTED: beta-1,4-mannosyl-glycoprotein 4-beta-N-acetylglucosaminyltransferase isoform X1 [Beta vulgaris subsp. vulgaris])	gi|61252085|sp|Q02527.2|MGAT3_RAT(RecName: Full=Beta-1,4-mannosyl-glycoprotein 4-beta-N-acetylglucosaminyltransferase; AltName: Full=N-glycosyl-oligosaccharide-glycoprotein N-acetylglucosaminyltransferase III; Short=GNT-III; Short=GlcNAc-T III; Short=N-acetylglucosaminyltransferase III)
Phn-m0082-3p	TRINITY_DN91841_c4_g1	2	1	22	171	192	AACGTGAACAATCTGATGTATC	|||||:||||||||*||*||||	TTGCATTTGTTAGAGTAGATAG								PF00248.18(Aldo_ket_red:Aldo/keto reductase family)	GO:0016491(molecular_function:oxidoreductase activity); GO:0055114(biological_process:oxidation-reduction process)	gi|902236143|gb|KNA24239.1|( hypothetical protein SOVF_017810 [Spinacia oleracea])	gi|75266185|sp|Q9SQ64.1|COR2_PAPSO(RecName: Full=Non-functional NADPH-dependent codeinone reductase 2)
Phn-m0082-3p	TRINITY_DN92548_c7_g1	2	1	22	5542	5563	AACGTGAACAATCTGATGTATC	|||||:|||||:*|||||||||	TTGCATTTGTTGAACTACATAG								PF00394.19(Cu-oxidase:Multicopper oxidase); PF07731.11(Cu-oxidase_2:Multicopper oxidase); PF00036.29(EF-hand_1:EF hand); PF13202.3(EF-hand_5:EF hand); PF13405.3(EF-hand_6:EF-hand domain); PF13499.3(EF-hand_7:EF-hand domain pair); PF13833.3(EF-hand_8:EF-hand domain pair); PF12763.4(EF-hand_4:Cytoskeletal-regulatory complex EF hand); PF10591.6(SPARC_Ca_bdg:Secreted protein acidic and rich in cystei…	GO:0016491(molecular_function:oxidoreductase activity); GO:0055114(biological_process:oxidation-reduction process); GO:0005507(molecular_function:copper ion binding)	gi|902173126|gb|KNA08226.1|( hypothetical protein SOVF_164390 [Spinacia oleracea])	gi|114268|sp|Q00624.1|ASOL_BRANA(RecName: Full=L-ascorbate oxidase homolog; Flags: Precursor)
Phn-m0082-3p	TRINITY_DN93285_c2_g1	2	1	22	896	917	AACGTGAACAATCTGATGTATC	|||||:|||||:||*|||||||	TTGCATTTGTTGGAATACATAG								PF12799.4(LRR_4:Leucine Rich repeats (2 copies)); PF08263.9(LRRNT_2:Leucine rich repeat N-terminal domain); PF13855.3(LRR_8:Leucine rich repeat); PF00560.30(LRR_1:Leucine Rich Repeat)	GO:0016740(molecular_function:transferase activity)	gi|731322269|ref|XP_010671799.1|( PREDICTED: probable LRR receptor-like serine/threonine-protein kinase At3g47570 [Beta vulgaris subsp. vulgaris])	gi|264664489|sp|C0LGP4.1|Y3475_ARATH(RecName: Full=Probable LRR receptor-like serine/threonine-protein kinase At3g47570; Flags: Precursor)
Phn-m0087-5p	TRINITY_DN86386_c1_g1	2	1	22	1395	1416	TAAGGCCATGTTCTTTTGGACT	|*|||||||||||||||||**|	AATCCGGTACAAGAAAACCAAA								PF01156.16(IU_nuc_hydro:Inosine-uridine preferring nucleoside hydrolase)		gi|731343911|ref|XP_010683131.1|( PREDICTED: probable uridine nucleosidase 2 [Beta vulgaris subsp. vulgaris])	gi|75154756|sp|Q8LAC4.1|URH2_ARATH(RecName: Full=Probable uridine nucleosidase 2; AltName: Full=Uridine ribohydrolase 2)
Phn-m0087-5p	TRINITY_DN86386_c1_g4	2	1	22	666	687	TAAGGCCATGTTCTTTTGGACT	|*|||||*||||||||||||||	AATCCGGGACAAGAAAACCTGA											gi|75136136|sp|Q6ZJ05.1|URH1_ORYSJ(RecName: Full=Probable uridine nucleosidase 1; AltName: Full=Uridine ribohydrolase 1)
Phn-m0087-5p	TRINITY_DN86557_c1_g1	2	1	22	1152	1173	TAAGGCCATGTTCTTTTGGACT	|*|||*||||||||||||||||	AATCCAGTACAAGAAAACCTGA								PF00407.16(Bet_v_1:Pathogenesis-related protein Bet v I family); PF10604.6(Polyketide_cyc2:Polyketide cyclase / dehydrase and lipid transport)	GO:0009607(biological_process:response to biotic stimulus); GO:0006952(biological_process:defense response)	gi|731342863|ref|XP_010682610.1|( PREDICTED: MLP-like protein 423 [Beta vulgaris subsp. vulgaris])	gi|75163188|sp|Q93VR4.1|ML423_ARATH(RecName: Full=MLP-like protein 423)
Phn-m0087-5p	TRINITY_DN86602_c1_g3	2	1	22	149	170	TAAGGCCATGTTCTTTTGGACT	|||||||||:||*|||||||*|	ATTCCGGTATAAAAAAACCTTA								PF10604.6(Polyketide_cyc2:Polyketide cyclase / dehydrase and lipid transport); PF00407.16(Bet_v_1:Pathogenesis-related protein Bet v I family)		gi|902164307|gb|KNA06955.1|( hypothetical protein SOVF_176310 [Spinacia oleracea])	gi|25008713|sp|P59082.1|LFS_ALLCE(RecName: Full=Lachrymatory-factor synthase; Flags: Precursor [Allium cepa])
Phn-m0087-5p	TRINITY_DN86708_c2_g3	2	1	22	1317	1338	TAAGGCCATGTTCTTTTGGACT	|||||*|||||||||||::|*|	ATTCCCGTACAAGAAAATTTAA								PF03763.10(Remorin_C:Remorin, C-terminal region)		gi|694445888|ref|XP_009349347.1|( PREDICTED: remorin-like [Pyrus x bretschneideri])	gi|34925093|sp|P93788.1|REMO_SOLTU(RecName: Full=Remorin; AltName: Full=pp34)
Phn-m0087-5p	TRINITY_DN87164_c1_g1	2	1	22	69	89	TAAGGCCATGTTCTTTTGGACT	|||||*||||||||||||*|*|	ATTCCAGTACAAGAAAACGT-A								PF13639.3(zf-RING_2:Ring finger domain); PF17123.2(zf-RING_11:RING-like zinc finger); PF12678.4(zf-rbx1:RING-H2 zinc finger domain); PF13923.3(zf-C3HC4_2:Zinc finger, C3HC4 type (RING finger)); PF00097.22(zf-C3HC4:Zinc finger, C3HC4 type (RING finger)); PF12861.4(zf-ANAPC11:Anaphase-promoting complex subunit 11 RING-H2 finger); PF13920.3(zf-C3HC4_3:Zinc finger, C3HC4 type (RING finger))		gi|731357431|ref|XP_010690208.1|( PREDICTED: RING-H2 finger protein ATL52 [Beta vulgaris subsp. vulgaris])	gi|68565207|sp|Q8LFY8.2|ATL54_ARATH(RecName: Full=RING-H2 finger protein ATL54)
Phn-m0087-5p	TRINITY_DN87164_c2_g2	2	1	22	2298	2319	TAAGGCCATGTTCTTTTGGACT	|*|||*||||||||||||||||	AATCCAGTACAAGAAAACCTGA					K03869	CUL3	map04120(Ubiquitin mediated proteolysis)	PF00888.19(Cullin:Cullin family)	GO:0006511(biological_process:ubiquitin-dependent protein catabolic process); GO:0031625(molecular_function:ubiquitin protein ligase binding)	gi|902202900|gb|KNA14415.1|( hypothetical protein SOVF_107790 [Spinacia oleracea])	gi|75315944|sp|Q9ZVH4.1|CUL3A_ARATH(RecName: Full=Cullin-3A; Short=AtCUL3a)
Phn-m0087-5p	TRINITY_DN87285_c2_g2	2	1	22	2007	2028	TAAGGCCATGTTCTTTTGGACT	||||||**||||||||||||||	ATTCCGAGACAAGAAAACCTGA										gi|731322850|ref|XP_010672120.1|( PREDICTED: MATH domain-containing protein At5g43560 isoform X2 [Beta vulgaris subsp. vulgaris])	gi|75247676|sp|Q8RY18.1|Y5436_ARATH(RecName: Full=MATH domain-containing protein At5g43560)
Phn-m0087-5p	TRINITY_DN87836_c3_g1	2	1	22	925	946	TAAGGCCATGTTCTTTTGGACT	|*|||||*||||||||||||||	AATCCGGGACAAGAAAACCTGA	COG1963(S:Function unknown )		COG1963(Acid phosphatase vanadium-dependent haloperoxidase related)		K09775	K09775		PF02681.11(DUF212:Divergent PAP2 family)	GO:0016021(cellular_component:integral component of membrane)	gi|731329709|ref|XP_010675740.1|( PREDICTED: uncharacterized protein LOC104891704 [Beta vulgaris subsp. vulgaris])	gi|81555938|sp|O32107.1|YUID_BACSU(RecName: Full=Uncharacterized membrane protein YuiD)
Phn-m0087-5p	TRINITY_DN88017_c0_g2	2	1	22	51	72	TAAGGCCATGTTCTTTTGGACT	|*|||||*||||||||||||||	AATCCGGGACAAGAAAACCTGA											gi|75158903|sp|Q8RXS1.1|PNSB4_ARATH(RecName: Full=Photosynthetic NDH subunit of subcomplex B 4, chloroplastic; Short=Protein PnsB4; AltName: Full=NDH DEPENDENT FLOW 6; AltName: Full=NDH-DEPENDENT CYCLIC ELECTRON FLOW 6; Flags: Precursor)
Phn-m0087-5p	TRINITY_DN88138_c0_g1	2	1	22	2196	2217	TAAGGCCATGTTCTTTTGGACT	|*|||||*||||||||||||||	AATCCGGGACAAGAAAACCTGA	COG2132(Q:Secondary metabolites biosynthesis, transport and catabolism )		COG2132(Multicopper oxidase)					PF07731.11(Cu-oxidase_2:Multicopper oxidase); PF00394.19(Cu-oxidase:Multicopper oxidase); PF07732.12(Cu-oxidase_3:Multicopper oxidase)	GO:0005507(molecular_function:copper ion binding); GO:0016021(cellular_component:integral component of membrane); GO:0016491(molecular_function:oxidoreductase activity); GO:0055114(biological_process:oxidation-reduction process)	gi|731330523|ref|XP_010676176.1|( PREDICTED: monocopper oxidase-like protein SKU5 [Beta vulgaris subsp. vulgaris])	gi|38258655|sp|Q9SU40.1|SKU5_ARATH(RecName: Full=Monocopper oxidase-like protein SKU5; AltName: Full=Skewed roots; Flags: Precursor)
Phn-m0087-5p	TRINITY_DN88331_c1_g1	2	1	22	1300	1321	TAAGGCCATGTTCTTTTGGACT	||||*|||:|||||||:|||||	ATTCAGGTGCAAGAAAGCCTGA								PF14159.3(CAAD:CAAD domains of cyanobacterial aminoacyl-tRNA synthetase)		gi|902223651|gb|KNA19528.1|( hypothetical protein SOVF_060860 [Spinacia oleracea])	gi|38503349|sp|Q8LCA1.2|CUT1B_ARATH(RecName: Full=Protein CURVATURE THYLAKOID 1B, chloroplastic; AltName: Full=Photosystem I protein P; AltName: Full=Thylakoid membrane phosphoprotein 14 kDa; Flags: Precursor)
Phn-m0087-5p	TRINITY_DN88623_c1_g1	2	1	22	1335	1356	TAAGGCCATGTTCTTTTGGACT	|||||*|*||||||||||||||	ATTCCAGGACAAGAAAACCTGA					K20307	TRAPPC10, TRS130				gi|731329460|ref|XP_010675603.1|( PREDICTED: uncharacterized protein LOC104891593 [Beta vulgaris subsp. vulgaris])	gi|746001953|sp|F4K0C4.1|TR130_ARATH(RecName: Full=Trafficking protein particle complex II-specific subunit 130 homolog; Short=AtTRS130; Short=TRAPP II-specific subunit 130 homolog)
Phn-m0087-5p	TRINITY_DN88651_c1_g2	2	1	22	1573	1594	TAAGGCCATGTTCTTTTGGACT	|*|||||*||||||||||||||	AATCCGGGACAAGAAAACCTGA	COG0515(T:Signal transduction mechanisms )		COG0515(Serine Threonine protein kinase)		K04733	IRAK4		PF07714.14(Pkinase_Tyr:Protein tyrosine kinase); PF00069.22(Pkinase:Protein kinase domain)	GO:0006468(biological_process:protein phosphorylation); GO:0005524(molecular_function:ATP binding); GO:0016021(cellular_component:integral component of membrane); GO:0004674(molecular_function:protein serine/threonine kinase activity)	gi|731353095|ref|XP_010687882.1|( PREDICTED: calmodulin-binding receptor-like cytoplasmic kinase 3 [Beta vulgaris subsp. vulgaris])	gi|75333019|sp|Q9ASQ5.1|CRCK3_ARATH(RecName: Full=Calmodulin-binding receptor-like cytoplasmic kinase 3; Flags: Precursor)
Phn-m0087-5p	TRINITY_DN89173_c0_g1	2	1	22	271	292	TAAGGCCATGTTCTTTTGGACT	|*|||*||||||||||||||||	AATCCAGTACAAGAAAACCTGA											gi|75309277|sp|Q9FPQ8.1|KNAT7_ARATH(RecName: Full=Homeobox protein knotted-1-like 7; AltName: Full=Protein IRREGULAR XYLEM 11; AltName: Full=Protein KNAT7)
Phn-m0087-5p	TRINITY_DN89173_c3_g1	2	1	22	1035	1056	TAAGGCCATGTTCTTTTGGACT	|||||*|||*||||||||||||	ATTCCAGTAGAAGAAAACCTGA					K05894	OPR	map00592(alpha-Linolenic acid metabolism)			gi|657983564|ref|XP_008383861.1|( PREDICTED: putative 12-oxophytodienoate reductase 11 [Malus domestica])	gi|338818374|sp|B9FSC8.1|OPR11_ORYSJ(RecName: Full=Putative 12-oxophytodienoate reductase 11; AltName: Full=OPDA-reductase 11; Short=OsOPR11)
Phn-m0087-5p	TRINITY_DN89670_c3_g7	2	1	22	125	146	TAAGGCCATGTTCTTTTGGACT	|||||||*|||||*||||||||	ATTCCGGGACAAGTAAACCTGA					K11593	ELF2C, AGO				gi|955326418|ref|XP_014632339.1|( PREDICTED: protein argonaute 4A-like [Glycine max])	gi|75203337|sp|Q9SDG8.1|AGO4A_ORYSJ(RecName: Full=Protein argonaute 4A; Short=OsAGO4a)
Phn-m0087-5p	TRINITY_DN89858_c3_g3	2	1	22	2675	2696	TAAGGCCATGTTCTTTTGGACT	||||:||*|||||||||||||*	ATTCTGGGACAAGAAAACCTGT								PF04832.9(SOUL:SOUL heme-binding protein); PF10184.6(DUF2358:Uncharacterized conserved protein (DUF2358))		gi|902166877|gb|KNA07285.1|( hypothetical protein SOVF_173330, partial [Spinacia oleracea])	gi|75207320|sp|Q9SR77.1|HBPL1_ARATH(RecName: Full=Heme-binding-like protein At3g10130, chloroplastic; Flags: Precursor)
Phn-m0087-5p	TRINITY_DN89927_c1_g2	2	1	22	637	658	TAAGGCCATGTTCTTTTGGACT	|||||||*||||||||:||||*	ATTCCGGGACAAGAAAGCCTGC								PF00011.18(HSP20:Hsp20/alpha crystallin family)	GO:0005777(cellular_component:peroxisome)	gi|595941816|ref|XP_007215881.1|( hypothetical protein PRUPE_ppa010560mg [Prunus persica])	gi|75536184|sp|Q4UKR8.1|HSPC2_RICFE(RecName: Full=Small heat shock protein C2)
Phn-m0087-5p	TRINITY_DN90090_c1_g3	2	1	22	464	485	TAAGGCCATGTTCTTTTGGACT	|||||||*||||*|||||||||	ATTCCGGGACAACAAAACCTGA					K13280	SEC11, sipW	map03060(Protein export)	PF11980.5(DUF3481:C-terminal domain of neuropilin glycoprotein); PF00717.20(Peptidase_S24:Peptidase S24-like)	GO:0016021(cellular_component:integral component of membrane); GO:0006465(biological_process:signal peptide processing); GO:0008233(molecular_function:peptidase activity)	gi|1025394335|ref|XP_016436027.1|( PREDICTED: signal peptidase complex catalytic subunit SEC11A-like [Nicotiana tabacum])	gi|54039632|sp|P67810.1|SC11A_BOVIN(RecName: Full=Signal peptidase complex catalytic subunit SEC11A; AltName: Full=Endopeptidase SP18; AltName: Full=Microsomal signal peptidase 18 kDa subunit; Short=SPase 18 kDa subunit; AltName: Full=SEC11 homolog A; AltName: Full=SEC11-like protein 1; AltName: Full=SPC18 >gi|54039633|sp|P67811.1|SC11A_CANFA RecName: Full=Signal peptidase complex catalytic subun…
Phn-m0087-5p	TRINITY_DN90958_c0_g3	2	1	22	836	857	TAAGGCCATGTTCTTTTGGACT	|*|||||*||||||||||||||	AATCCGGAACAAGAAAACCTGA					K02915	RP-L34e, RPL34	map03010(Ribosome)	PF01199.15(Ribosomal_L34e:Ribosomal protein L34e)	GO:0005840(cellular_component:ribosome); GO:0003735(molecular_function:structural constituent of ribosome); GO:0006412(biological_process:translation)	gi|658001376|ref|XP_008393151.1|( PREDICTED: 60S ribosomal protein L34-like [Malus domestica])	gi|730558|sp|P41098.1|RL34_TOBAC(RecName: Full=60S ribosomal protein L34)
Phn-m0087-5p	TRINITY_DN91072_c2_g2	2	1	22	1460	1481	TAAGGCCATGTTCTTTTGGACT	|*|||||*||||||||||||||	AATCCGGGACAAGAAAACCTGA		NOG00563(T:Signal transduction mechanisms )		NOG00563(Mitogen-activated protein kinase)	K14512	MPK6	map04016(MAPK signaling pathway - plant); map04075(Plant hormone signal transduction)	PF00069.22(Pkinase:Protein kinase domain); PF07714.14(Pkinase_Tyr:Protein tyrosine kinase)	GO:0004707(molecular_function:MAP kinase activity); GO:0005622(cellular_component:intracellular); GO:0000165(biological_process:MAPK cascade); GO:0005524(molecular_function:ATP binding)	gi|950645818|gb|ALN38712.1|( MAPK1 [Dianthus caryophyllus])	gi|585519|sp|Q07176.1|MMK1_MEDSA(RecName: Full=Mitogen-activated protein kinase homolog MMK1; AltName: Full=MAP kinase ERK1; AltName: Full=MAP kinase MSK7)
Phn-m0087-5p	TRINITY_DN91578_c0_g1	2	1	22	101	122	TAAGGCCATGTTCTTTTGGACT	||||||*||||||||*||||||	ATTCCGATACAAGAACACCTGA					K05288	PIGO	map00563(Glycosylphosphatidylinositol (GPI)-anchor biosynthesis)		GO:0016021(cellular_component:integral component of membrane); GO:0008152(biological_process:metabolic process); GO:0005524(molecular_function:ATP binding); GO:0003824(molecular_function:catalytic activity)	gi|731330889|ref|XP_010676374.1|( PREDICTED: GPI ethanolamine phosphate transferase 3 [Beta vulgaris subsp. vulgaris])	gi|61252289|sp|Q8TEQ8.3|PIGO_HUMAN(RecName: Full=GPI ethanolamine phosphate transferase 3; AltName: Full=Phosphatidylinositol-glycan biosynthesis class O protein; Short=PIG-O)
Phn-m0087-5p	TRINITY_DN91695_c4_g1	2	1	22	68	89	TAAGGCCATGTTCTTTTGGACT	|||||||*|||||||||**|||	ATTCCGGGACAAGAAAAAATGA								PF02714.12(RSN1_7TM:Calcium-dependent channel, 7TM region, putative phosphate)	GO:0016021(cellular_component:integral component of membrane)	gi|731319538|ref|XP_010670325.1|( PREDICTED: CSC1-like protein RXW8 [Beta vulgaris subsp. vulgaris])	gi|75164929|sp|Q94A87.1|CSCL9_ARATH(RecName: Full=CSC1-like protein At1g10090)
Phn-m0087-5p	TRINITY_DN91788_c1_g1	2	1	22	860	882	TAAGGCCATGTTCTTTTGGAC-T	**|||||||||||||||||||*|	TATCCGGTACAAGAAAACCTGCA					K07904	RAB11A	map04144(Endocytosis)		GO:0005525(molecular_function:GTP binding); GO:0005622(cellular_component:intracellular); GO:0007264(biological_process:small GTPase mediated signal transduction)	gi|902212408|gb|KNA16946.1|( hypothetical protein SOVF_084230 [Spinacia oleracea])	gi|75337573|sp|Q9SRS5.1|RAA5B_ARATH(RecName: Full=Ras-related protein RABA5b; Short=AtRABA5b)
Phn-m0087-5p	TRINITY_DN92128_c5_g1	2	1	22	1688	1709	TAAGGCCATGTTCTTTTGGACT	|*|||*||||||||||||||||	AATCCAGTACAAGAAAACCTGA	COG2036(B:Chromatin structure and dynamics )		COG2036(Core component of nucleosome. Nucleosomes wrap and compact DNA into chromatin, limiting DNA accessibility to the cellular machineries which require DNA as a template. Histones thereby play a central role in transcription regulation, DNA repair, DNA replication and chromosomal stability. DNA accessibility is regulated via a complex set of post-translational modifications of histones, also …		K11253	H3		PF00125.21(Histone:Core histone H2A/H2B/H3/H4); PF15511.3(CENP-T_C:Centromere kinetochore component CENP-T histone fold); PF15630.3(CENP-S:CENP-S protein)	GO:0046982(molecular_function:protein heterodimerization activity); GO:0000786(cellular_component:nucleosome); GO:0016021(cellular_component:integral component of membrane); GO:0005634(cellular_component:nucleus); GO:0003677(molecular_function:DNA binding)	gi|604319816|gb|EYU30980.1|( hypothetical protein MIMGU_mgv1a014700mg [Erythranthe guttata])	gi|27734400|sp|P59169.2|H33_ARATH(RecName: Full=Histone H3.3; AltName: Full=Histone H3.2 >gi|54035960|sp|Q71V89.3|H33_GOSHI RecName: Full=Histone H3.3 >gi|59799551|sp|P69245.2|H33_LOLTE RecName: Full=Histone H3.3 >gi|59799580|sp|P69244.2|H33_MEDSA RecName: Full=Histone H3.3; AltName: Full=Histone H3.2; AltName: Full=Minor histone H3 >gi|73919839|sp|Q71H73.3|H33_VITVI RecName: Full=Histone H3.3 >g…
Phn-m0087-5p	TRINITY_DN92295_c3_g6	2	1	22	97	118	TAAGGCCATGTTCTTTTGGACT	|||||*|*||||||||||||||	ATTCCAGAACAAGAAAACCTGA					K10712	ADO	map00430(Taurine and hypotaurine metabolism)		GO:0055114(biological_process:oxidation-reduction process); GO:0016702(molecular_function:oxidoreductase activity, acting on single donors with incorporation of molecular oxygen, incorporation of two atoms of oxygen)	gi|902206034|gb|KNA15356.1|( hypothetical protein SOVF_099060 isoform B [Spinacia oleracea])	gi|122178716|sp|Q1G3U6.1|PCO3_ARATH(RecName: Full=Plant cysteine oxidase 3; AltName: Full=NIFS-like protein 2; Short=NifS2)
Phn-m0087-5p	TRINITY_DN92623_c1_g1	2	1	22	118	139	TAAGGCCATGTTCTTTTGGACT	|*|||||*||||||||||||||	AATCCGGGACAAGAAAACCTGA					K04733	IRAK4		PF07714.14(Pkinase_Tyr:Protein tyrosine kinase); PF00069.22(Pkinase:Protein kinase domain); PF11883.5(DUF3403:Domain of unknown function (DUF3403))	GO:0004672(molecular_function:protein kinase activity); GO:0016020(cellular_component:membrane)	gi|731351339|ref|XP_010686985.1|( PREDICTED: uncharacterized protein LOC104901135 [Beta vulgaris subsp. vulgaris])	gi|75329759|sp|Q8L7G3.1|CRK7_ARATH(RecName: Full=Cysteine-rich receptor-like protein kinase 7; Short=Cysteine-rich RLK7; Flags: Precursor)
Phn-m0087-5p	TRINITY_DN93010_c2_g1	2	1	22	1811	1832	TAAGGCCATGTTCTTTTGGACT	|||||*|*||||||||||||||	ATTCCAGAACAAGAAAACCTGA	COG1022(I:Lipid transport and metabolism )		COG1022(Amp-dependent synthetase and ligase)		K01897	ACSL, fadD	map04146(Peroxisome); map00061(Fatty acid biosynthesis); map00071(Fatty acid degradation)	PF00501.25(AMP-binding:AMP-binding enzyme)	GO:0016021(cellular_component:integral component of membrane); GO:0008152(biological_process:metabolic process); GO:0016874(molecular_function:ligase activity)	gi|902238150|gb|KNA25058.1|( hypothetical protein SOVF_010080 [Spinacia oleracea])	gi|75206264|sp|Q9SJD4.1|LACS8_ARATH(RecName: Full=Long chain acyl-CoA synthetase 8)
Phn-m0087-5p	TRINITY_DN93113_c3_g2	2	1	22	45	66	TAAGGCCATGTTCTTTTGGACT	|*|||*||||||||||||||||	AATCCAGTACAAGAAAACCTGA		NOG137892(S:Function unknown )		NOG137892()						gi|902170933|gb|KNA07922.1|( hypothetical protein SOVF_167350 [Spinacia oleracea])	gi|34395875|sp|Q84MC0.1|UGPI4_ARATH(RecName: Full=Uncharacterized GPI-anchored protein At3g06035; Flags: Precursor)
Phn-m0087-5p	TRINITY_DN93149_c2_g1	2	1	22	1825	1846	TAAGGCCATGTTCTTTTGGACT	|*|||||||||||||||**|||	ACTCCGGTACAAGAAAAAATGA								PF13041.3(PPR_2:PPR repeat family); PF01535.17(PPR:PPR repeat); PF12854.4(PPR_1:PPR repeat); PF13812.3(PPR_3:Pentatricopeptide repeat domain); PF00046.26(Homeobox:Homeobox domain); PF05920.8(Homeobox_KN:Homeobox KN domain)		gi|902218915|gb|KNA18175.1|( hypothetical protein SOVF_073260 [Spinacia oleracea])	gi|223635639|sp|Q9SVP7.2|PP307_ARATH(RecName: Full=Pentatricopeptide repeat-containing protein At4g13650)
Phn-m0087-5p	TRINITY_DN93161_c0_g1	2	1	22	201	222	TAAGGCCATGTTCTTTTGGACT	|||||||*:||||||||*||||	ATTCCGGGGCAAGAAAAGCTGA										gi|947042950|gb|KRG92674.1|( hypothetical protein GLYMA_20G224500 [Glycine max])	gi|2842757|sp|Q99090.2|CPRF2_PETCR(RecName: Full=Light-inducible protein CPRF2; AltName: Full=Common plant regulatory factor 2; Short=CPRF-2)
Phn-m0089-5p	TRINITY_DN90354_c0_g2	2	1	23	4780	4802	TCACTTTATAAACTAAGGGGACT	:||||||||||*|||||||:*||	GGTGAAATATTCGATTCCCTCGA	COG0016(J:Translation, ribosomal structure and biogenesis )		COG0016(phenylalanyL-tRNA synthetase, alpha subunit)					PF10551.6(MULE:MULE transposase domain); PF03101.12(FAR1:FAR1 DNA-binding domain); PF04434.14(SWIM:SWIM zinc finger); PF01610.14(DDE_Tnp_ISL3:Transposase); PF00872.15(Transposase_mut:Transposase, Mutator family); PF01409.17(tRNA-synt_2d:tRNA synthetases class II core domain (F)); PF00152.17(tRNA-synt_2:tRNA synthetases class II (D, K and N))	GO:0045893(biological_process:positive regulation of transcription, DNA-templated); GO:0042753(biological_process:positive regulation of circadian rhythm); GO:0009585(biological_process:red, far-red light phototransduction); GO:0008270(molecular_function:zinc ion binding); GO:0010218(biological_process:response to far red light); GO:0003700(molecular_function:transcription factor activity, sequen…	gi|731338122|ref|XP_010680157.1|( PREDICTED: protein FAR-RED ELONGATED HYPOCOTYL 3 isoform X2 [Beta vulgaris subsp. vulgaris])	gi|75273369|sp|Q9LIE5.1|FHY3_ARATH(RecName: Full=Protein FAR-RED ELONGATED HYPOCOTYL 3)
Phn-m0089-5p	TRINITY_DN90755_c3_g1	2	1	23	2228	2250	TCACTTTATAAACTAAGGGGACT	:*|||||||||||||||||:*||	GATGAAATATTTGATTCCCTCGA								PF00170.18(bZIP_1:bZIP transcription factor); PF07716.12(bZIP_2:Basic region leucine zipper)	GO:0006355(biological_process:regulation of transcription, DNA-templated); GO:0043565(molecular_function:sequence-specific DNA binding); GO:0003700(molecular_function:transcription factor activity, sequence-specific DNA binding)	gi|731316178|ref|XP_010694542.1|( PREDICTED: basic leucine zipper 43 [Beta vulgaris subsp. vulgaris])	gi|75309207|sp|Q9FMC2.1|BZP43_ARATH(RecName: Full=Basic leucine zipper 43; Short=AtbZIP43; Short=bZIP protein 43)
Phn-m0089-5p	TRINITY_DN90911_c2_g1	2	1	23	4708	4730	TCACTTTATAAACTAAGGGGACT	:|||:||||||||:|||||:*||	GGTGGAATATTTGGTTCCCTCGA	COG5474(S:Function unknown )		COG5474(Domain of unknown function (DUF1817))					PF08847.8(DUF1817:Domain of unknown function (DUF1817)); PF06596.8(PsbX:Photosystem II reaction centre X protein (PsbX)); PF00036.29(EF-hand_1:EF hand); PF13405.3(EF-hand_6:EF-hand domain); PF13202.3(EF-hand_5:EF hand)	GO:0044434(cellular_component:chloroplast part)	gi|731352889|ref|XP_010687776.1|( PREDICTED: uncharacterized protein LOC104901846 [Beta vulgaris subsp. vulgaris])	gi|75100581|sp|O82258.1|CRR6_ARATH(RecName: Full=Protein CHLORORESPIRATORY REDUCTION 6, chloroplastic; Flags: Precursor)
Phn-m0090-3p	TRINITY_DN86152_c0_g2	2	1	24	174	197	AAGAGAATTACAGTCCAAAAGAAC	*|:|:|||||||:|||||||||||	GTTTTTTAATGTTAGGTTTTCTTG										gi|723692880|ref|XP_010319867.1|( PREDICTED: uncharacterized protein At5g03900, chloroplastic isoform X1 [Solanum lycopersicum])	gi|88909724|sp|Q8GW20.2|Y5390_ARATH(RecName: Full=Uncharacterized protein At5g03900, chloroplastic; Flags: Precursor)
Phn-m0090-3p	TRINITY_DN87095_c1_g1	2	1	24	2556	2579	AAGAGAATTACAGTCCAAAAGAAC	*||||||||||*||||||*|||||	GTCTCTTAATGCCAGGTTGTCTTG	COG0039(C:Energy production and conversion )		COG0039(Catalyzes the reversible oxidation of malate to oxaloacetate (By similarity))		K00025	MDH1	map00020(Citrate cycle (TCA cycle)); map00270(Cysteine and methionine metabolism); map00710(Carbon fixation in photosynthetic organisms); map00620(Pyruvate metabolism); map00630(Glyoxylate and dicarboxylate metabolism)	PF00056.20(Ldh_1_N:lactate/malate dehydrogenase, NAD binding domain); PF02866.15(Ldh_1_C:lactate/malate dehydrogenase, alpha/beta C-terminal domain)	GO:0005975(biological_process:carbohydrate metabolic process); GO:0030060(molecular_function:L-malate dehydrogenase activity); GO:0006108(biological_process:malate metabolic process); GO:0006099(biological_process:tricarboxylic acid cycle); GO:0016020(cellular_component:membrane)	gi|731361010|ref|XP_010692126.1|( PREDICTED: malate dehydrogenase, cytoplasmic-like isoform X1 [Beta vulgaris subsp. vulgaris])	gi|18202485|sp|Q08062.2|MDHC_MAIZE(RecName: Full=Malate dehydrogenase, cytoplasmic)
Phn-m0090-3p	TRINITY_DN88138_c1_g1	2	1	24	1342	1365	AAGAGAATTACAGTCCAAAAGAAC	*||*:|||||||||||||||||||	GTCATTTAATGTCAGGTTTTCTTG					K18592	GGT1_5, CD224	map00460(Cyanoamino acid metabolism); map00590(Arachidonic acid metabolism); map00480(Glutathione metabolism); map00430(Taurine and hypotaurine metabolism)	PF01019.18(G_glu_transpept:Gamma-glutamyltranspeptidase)	GO:0003840(molecular_function:gamma-glutamyltransferase activity); GO:0006749(biological_process:glutathione metabolic process); GO:0016021(cellular_component:integral component of membrane)	gi|731354084|ref|XP_010688393.1|( PREDICTED: gamma-glutamyltranspeptidase 3 isoform X1 [Beta vulgaris subsp. vulgaris])	gi|75181457|sp|Q9M0G0.1|GAGT3_ARATH(RecName: Full=Gamma-glutamyltranspeptidase 3; AltName: Full=Gamma-glutamyltransferase 3; AltName: Full=Gamma-glutamyltranspeptidase 4; AltName: Full=Glutathione hydrolase 3)
Phn-m0090-3p	TRINITY_DN88903_c0_g1	2	1	24	893	916	AAGAGAATTACAGTCCAAAAGAAC	*||*:|||||||||||||||||||	GTCGTTTAATGTCAGGTTTTCTTG					K16055	TPS	map00500(Starch and sucrose metabolism)			gi|548831058|gb|ERM93894.1|( hypothetical protein AMTR_s00137p00018220 [Amborella trichopoda])	gi|172045841|sp|Q94AH8.2|TPS6_ARATH(RecName: Full=Alpha,alpha-trehalose-phosphate synthase [UDP-forming] 6; AltName: Full=Trehalose-6-phosphate synthase 6; Short=AtTPS6)
Phn-m0090-3p	TRINITY_DN92052_c0_g1	2	1	24	1193	1216	AAGAGAATTACAGTCCAAAAGAAC	*||*:|||||||||||||||||||	GTCATTTAATGTCAGGTTTTCTTG								PF03171.17(2OG-FeII_Oxy:2OG-Fe(II) oxygenase superfamily); PF14226.3(DIOX_N:non-haem dioxygenase in morphine synthesis N-terminal)	GO:0051213(molecular_function:dioxygenase activity)	gi|731336409|ref|XP_010679238.1|( PREDICTED: 2'-deoxymugineic-acid 2'-dioxygenase-like [Beta vulgaris subsp. vulgaris])	gi|269969449|sp|Q40062.3|IDS3_HORVU(RecName: Full=2'-deoxymugineic-acid 2'-dioxygenase; AltName: Full=Protein iron deficiency-specific 3)
Phn-m0094-5p	TRINITY_DN84245_c0_g1	2	1	23	635	658	ATTACACATAATTAGACA-AGTTT	||||*|||||||:|||||*|||||	TAATATGTATTAGTCTGTATCAAA								PF00612.24(IQ:IQ calmodulin-binding motif)		gi|731323444|ref|XP_010672433.1|( PREDICTED: protein IQ-DOMAIN 14 [Beta vulgaris subsp. vulgaris])	gi|75271948|sp|Q8LPG9.1|IQD14_ARATH(RecName: Full=Protein IQ-DOMAIN 14)
Phn-m0097-3p	TRINITY_DN87806_c3_g1	2	1	22	1760	1782	TGAGACAAAAACGATAAA-CTGA	|||||||||||||||*||**|||	ACTCTGTTTTTGCTACTTTTACT		NOG72953(S:Function unknown )		NOG72953()				PF14159.3(CAAD:CAAD domains of cyanobacterial aminoacyl-tRNA synthetase)	GO:0010287(cellular_component:plastoglobule); GO:0009941(cellular_component:chloroplast envelope); GO:0016021(cellular_component:integral component of membrane); GO:0009535(cellular_component:chloroplast thylakoid membrane)	gi|731311434|ref|XP_010669522.1|( PREDICTED: protein CURVATURE THYLAKOID 1A, chloroplastic [Beta vulgaris subsp. vulgaris])	gi|75097110|sp|O04616.1|CUT1A_ARATH(RecName: Full=Protein CURVATURE THYLAKOID 1A, chloroplastic; Flags: Precursor)
Phn-m0097-3p	TRINITY_DN88431_c0_g5	2	1	22	192	213	TGAGACAAAAACGATAAACTGA	*:||||||||||||||||**||	CTTCTGTTTTTGCTATTTCCCT											gi|2499614|sp|Q40517.1|NTF3_TOBAC(RecName: Full=Mitogen-activated protein kinase homolog NTF3; AltName: Full=P43)
Phn-m0097-3p	TRINITY_DN92728_c2_g5	2	1	22	2110	2130	TGAGACAAAAACGATAAACTGA	||||||||||||||||*|*||*	ACTCTGTTTTTGCTATCT-ACG		NOG82920(S:Function unknown )		NOG82920()						gi|731358884|ref|XP_010690989.1|( PREDICTED: uncharacterized protein LOC104904440 [Beta vulgaris subsp. vulgaris])	gi|75215741|sp|Q9XIM0.1|MEE14_ARATH(RecName: Full=CCG-binding protein 1; Short=AtCBP1; AltName: Full=Protein MATERNAL EFFECT EMBRYO ARREST 14)
Phn-m0101-5p	TRINITY_DN86211_c1_g4	2	1	23	101	123	TGAAACCGTTGTATGCATACAAG	*||*||||||||||||||||||*	TCTGTGGCAACATACGTATGTTA								PF00332.15(Glyco_hydro_17:Glycosyl hydrolases family 17)	GO:0005975(biological_process:carbohydrate metabolic process); GO:0046658(cellular_component:anchored component of plasma membrane); GO:0030247(molecular_function:polysaccharide binding); GO:0042973(molecular_function:glucan endo-1,3-beta-D-glucosidase activity)	gi|987437860|ref|NP_001306941.1|( glucan endo-1,3-beta-glucosidase-like precursor [Beta vulgaris subsp. vulgaris])	gi|378405175|sp|A7PQW3.2|E13B_VITVI(RecName: Full=Glucan endo-1,3-beta-glucosidase; AltName: Full=(1->3)-beta-glucan endohydrolase; Short=(1->3)-beta-glucanase; AltName: Full=Beta-1,3-endoglucanase; Flags: Precursor)
Phn-m0101-5p	TRINITY_DN86646_c2_g6	2	1	23	1207	1230	TGAAACCGTTGTATGCATACAA-G	|:||||||||::||||||||||*|	ATTTTGGCAATGTACGTATGTTGC		NOG121608(K:Transcription )		NOG121608(Transcription factor)	K09285	OVM, ANT		PF00847.17(AP2:AP2 domain)		gi|731354246|ref|XP_010688479.1|( PREDICTED: AP2-like ethylene-responsive transcription factor AIL5 [Beta vulgaris subsp. vulgaris])	gi|148886784|sp|Q6PQQ3.2|AIL5_ARATH(RecName: Full=AP2-like ethylene-responsive transcription factor AIL5; AltName: Full=Protein AINTEGUMENTA-LIKE 5)
Phn-m0101-5p	TRINITY_DN88342_c2_g1	2	1	23	68	91	TGAAACCGTTGTATGCATACAA-G	|:||||||||||*|||||||||*|	ATTTTGGCAACACACGTATGTTGC					K00472	P4HA	map00330(Arginine and proline metabolism)	PF13640.3(2OG-FeII_Oxy_3:2OG-Fe(II) oxygenase superfamily); PF01549.21(ShK:ShK domain-like)	GO:0016705(molecular_function:oxidoreductase activity, acting on paired donors, with incorporation or reduction of molecular oxygen); GO:0031418(molecular_function:L-ascorbic acid binding); GO:0005506(molecular_function:iron ion binding); GO:0055114(biological_process:oxidation-reduction process)	gi|902238874|gb|KNA25360.1|( hypothetical protein SOVF_007270 [Spinacia oleracea])	gi|75151282|sp|Q8GXT7.1|P4H12_ARATH(RecName: Full=Probable prolyl 4-hydroxylase 12; Short=AtP4H12)
Phn-m0101-5p	TRINITY_DN88466_c4_g1	2	1	23	304	326	TGAAACCGTTGTATGCATACAAG	|*||||||||:|||||||||||*	AGTTTGGCAATATACGTATGTTG					K10576	UBE2H, UBC8	map04120(Ubiquitin mediated proteolysis)	PF00179.23(UQ_con:Ubiquitin-conjugating enzyme)	GO:0005524(molecular_function:ATP binding)	gi|672140905|ref|XP_008794268.1|( PREDICTED: ubiquitin-conjugating enzyme E2 4-like [Phoenix dactylifera])	gi|21542468|sp|P42748.2|UBC4_ARATH(RecName: Full=Ubiquitin-conjugating enzyme E2 4; AltName: Full=E2 ubiquitin-conjugating enzyme 4; AltName: Full=Ubiquitin carrier protein 4; AltName: Full=Ubiquitin-conjugating enzyme E2-21 kDa 1; AltName: Full=Ubiquitin-protein ligase 4)
Phn-m0101-5p	TRINITY_DN88765_c2_g1	2	1	23	3838	3860	TGAAACCGTTGTATGCATACAAG	|:||||||||:|||:|||||||*	ATTTTGGCAATATATGTATGTTG					K13103	TFIP11		PF07842.9(GCFC:GC-rich sequence DNA-binding factor-like protein); PF12457.5(TIP_N:Tuftelin interacting protein N terminal); PF01585.20(G-patch:G-patch domain); PF12656.4(G-patch_2:DExH-box splicing factor binding site)	GO:0071008(cellular_component:U2-type post-mRNA release spliceosomal complex); GO:0006355(biological_process:regulation of transcription, DNA-templated); GO:0003677(molecular_function:DNA binding); GO:0000390(biological_process:spliceosomal complex disassembly)	gi|731320199|ref|XP_010670678.1|( PREDICTED: septin and tuftelin-interacting protein 1 homolog 1 [Beta vulgaris subsp. vulgaris])	gi|75205540|sp|Q9SHG6.1|STIP1_ARATH(RecName: Full=Septin and tuftelin-interacting protein 1 homolog 1; AltName: Full=Protein SPLICEOSOMAL TIMEKEEPER LOCUS 1)
Phn-m0101-5p	TRINITY_DN88798_c2_g1	2	1	23	242	264	TGAAACCGTTGTATGCATACAAG	|||*|||||||||:||||||||*	ACTCTGGCAACATGCGTATGTTG	COG5491(N:Cell motility )		COG5491(Charged multivesicular body protein)		K12192	CHMP2B	map04144(Endocytosis)	PF03357.18(Snf7:Snf7)	GO:0007034(biological_process:vacuolar transport); GO:0005622(cellular_component:intracellular)	gi|902171778|gb|KNA08042.1|( hypothetical protein SOVF_166000 [Spinacia oleracea])	gi|75249519|sp|Q941D5.1|VPS2C_ARATH(RecName: Full=Vacuolar protein sorting-associated protein 2 homolog 3; Short=AtVPS2-3; AltName: Full=Charged multivesicular body protein 2 homolog 3; AltName: Full=ESCRT-III complex subunit VPS2 homolog 3)
Phn-m0101-5p	TRINITY_DN89502_c4_g2	2	1	23	457	479	TGAAACCGTTGTATGCATACAAG	|:|||||:|||||:||||||||*	ATTTTGGTAACATGCGTATGTTA										gi|902189387|gb|KNA11358.1|( hypothetical protein SOVF_135950 [Spinacia oleracea])	gi|75335230|sp|Q9LN71.1|RING1_ARATH(RecName: Full=E3 ubiquitin-protein ligase At1g12760; AltName: Full=RING finger protein At1g12760)
Phn-m0101-5p	TRINITY_DN89533_c2_g1	2	1	23	1849	1871	TGAAACCGTTGTATGCATACAAG	|:|||||||||||:|||||*||*	ATTTTGGCAACATGCGTATATTG								PF13041.3(PPR_2:PPR repeat family); PF12854.4(PPR_1:PPR repeat); PF01535.17(PPR:PPR repeat); PF17177.1(PPR_long:Pentacotripeptide-repeat region of PROPR); PF13812.3(PPR_3:Pentatricopeptide repeat domain); PF14559.3(TPR_19:Tetratricopeptide repeat); PF11848.5(DUF3368:Domain of unknown function (DUF3368))		gi|731324902|ref|XP_010673222.1|( PREDICTED: pentatricopeptide repeat-containing protein At1g05600 [Beta vulgaris subsp. vulgaris])	gi|75213450|sp|Q9SYK1.1|PPR11_ARATH(RecName: Full=Pentatricopeptide repeat-containing protein At1g05600)
[truncated: 3,480 more rows]

## Sheet: Sheet2
query
Nov-m0182-5p
Nov-m0134-5p
Nov-m0252-3p
Nov-m0053-3p
Nov-m0052-3p
Nov-m0104-3p
Nov-m0077-5p
Nov-m0125-5p
Nov-m0200-5p
Nov-m0257-5p
Nov-m0064-3p
Nov-m0233-5p
Nov-m0278-3p
Nov-m0185-3p
Nov-m0223-5p
Nov-m0272-3p
Nov-m0049-5p
Nov-m0088-3p
Nov-m0106-5p
Nov-m0069-3p
Nov-m0105-3p
Nov-m0111-3p
Nov-m0248-3p
Nov-m0231-5p
Nov-m0216-5p
Nov-m0274-3p
Nov-m0061-5p
Nov-m0068-5p
Nov-m0284-3p
Nov-m0147-3p
Nov-m0028-3p
Nov-m0015-5p
Nov-m0277-3p
Nov-m0026-3p
Nov-m0007-5p
Nov-m0063-3p
Nov-m0051-3p
Nov-m0047-3p
Nov-m0230-5p
Nov-m0235-3p
Nov-m0275-3p
Nov-m0075-3p
Nov-m0127-5p
Nov-m0243-5p
Nov-m0018-5p
Nov-m0066-3p
Nov-m0036-5p
Nov-m0087-5p
Nov-m0274-5p
Nov-m0191-3p
Nov-m0179-5p
Nov-m0201-5p
Nov-m0016-5p
Nov-m0226-3p
Nov-m0234-3p
[truncated: 240 more rows]
