# Supplementary material for: Integrated Analyses of miRNAome and Transcriptome Reveal The Function of miRNAs in Morphogenesis of Organs and Defense of Endophytes in Pseudostellaria Heterophylla
Source: Research Square preprint supplement (doi:10.21203/rs.3.rs-239755/v1), 2021-03-01
Supplement: Supplementary file 13 [file e9f2d92c66279b061c56a959.xlsx]

## Sheet: Sheet1
query	target	score	query_start	query_end	target_start	target_end	query_seq	align	target_seq	cog	nog	cog_description	nog_description	KO_id	KO_name	paths	pfam	go	nr	swissprot
miR399a	TRINITY_DN86649_c2_g2	0	1	21	1115	1135	TGCCAAAGGAGAATTGCCCTG	|||||||||||||||||||||	ACGGTTTCCTCTTAACGGGAC										gi|225463450|ref|XP_002272654.1|( PREDICTED: agamous-like MADS-box protein AGL62 [Vitis vinifera])	_
miR169a-3p	TRINITY_DN93270_c2_g2	0	1	20	4354	4373	GGCAAGTTGTCCTTGGCTAC	||||||||||||||||||||	CCGTTCAACAGGAACCGATG										gi|731317972|ref|XP_010669470.1|( PREDICTED: uncharacterized protein LOC104886694 [Beta vulgaris subsp. vulgaris])	_
miR171e-3p	TRINITY_DN92867_c1_g1	0	1	21	642	662	TGATTGAGCCGTGCCAATATC	|||||||||||||||||||||	ACTAACTCGGCACGGTTATAG								PF03514.11(GRAS:GRAS domain family)		gi|902231904|gb|KNA22440.1|( hypothetical protein SOVF_034090 isoform B [Spinacia oleracea])	gi|75100159|sp|O81316.1|SCL6_ARATH(RecName: Full=Scarecrow-like protein 6; Short=AtSCL6; AltName: Full=GRAS family protein 22; Short=AtGRAS-22; AltName: Full=SCL6-IV)
miR169a	TRINITY_DN93270_c2_g2	0	1	21	4408	4428	CAGCCAAGGATGACTTGCCGA	|||||||||||||||||||||	GTCGGTTCCTACTGAACGGCT										gi|731317972|ref|XP_010669470.1|( PREDICTED: uncharacterized protein LOC104886694 [Beta vulgaris subsp. vulgaris])	_
miR398a-3p	TRINITY_DN87171_c1_g2	0.5	1	21	3321	3341	TGTGTTCTCAGGTCACCCCTT	||||||||||||||||||||*	ACACAAGAGTCCAGTGGGGAC					K16912	LAS1				gi|731325956|ref|XP_010673778.1|( PREDICTED: uncharacterized protein LOC104890105 isoform X2 [Beta vulgaris subsp. vulgaris])	_
miR398a-3p	TRINITY_DN87171_c1_g2	0.5	1	21	3151	3171	TGTGTTCTCAGGTCACCCCTT	||||||||||||||||||||*	ACACAAGAGTCCAGTGGGGAC					K16912	LAS1				gi|731325956|ref|XP_010673778.1|( PREDICTED: uncharacterized protein LOC104890105 isoform X2 [Beta vulgaris subsp. vulgaris])	_
miR319a-3p.2-3p	TRINITY_DN90304_c1_g3	0.5	1	20	1480	1499	TTGGACTGAAGGGTGCTCCC	||||||||||||||:|||||	AACCTGACTTCCCATGAGGG								PF03634.10(TCP:TCP family transcription factor); PF03732.14(Retrotrans_gag:Retrotransposon gag protein)		gi|731356574|ref|XP_010689747.1|( PREDICTED: transcription factor TCP4-like [Beta vulgaris subsp. vulgaris])	gi|75157409|sp|Q8LPR5.1|TCP4_ARATH(RecName: Full=Transcription factor TCP4; AltName: Full=Protein MATERNAL EFFECT EMBRYO ARREST 35)
miR399p	TRINITY_DN86649_c2_g2	0.5	1	21	1115	1135	TGCCAAAGGAGAGTTGCCCTG	||||||||||||:||||||||	ACGGTTTCCTCTTAACGGGAC										gi|225463450|ref|XP_002272654.1|( PREDICTED: agamous-like MADS-box protein AGL62 [Vitis vinifera])	_
miR156a	TRINITY_DN84801_c0_g1	0.5	1	21	1790	1810	TGACAGAAGAGAGAGAGCACA	||||||||||||||||||||*	ACTGTCTTCTCTCTCTCGTGC								PF03110.11(SBP:SBP domain)		gi|731343152|ref|XP_010682751.1|( PREDICTED: squamosa promoter-binding-like protein 2 [Beta vulgaris subsp. vulgaris])	gi|75112353|sp|Q5Z818.1|SPL12_ORYSJ(RecName: Full=Squamosa promoter-binding-like protein 12)
miR156a	TRINITY_DN84801_c0_g2	0.5	1	21	2299	2319	TGACAGAAGAGAGAGAGCACA	||||||||||||||||||||*	ACTGTCTTCTCTCTCTCGTGG								PF03110.11(SBP:SBP domain)		gi|731343152|ref|XP_010682751.1|( PREDICTED: squamosa promoter-binding-like protein 2 [Beta vulgaris subsp. vulgaris])	gi|67461550|sp|Q9S840.1|SPL2_ARATH(RecName: Full=Squamosa promoter-binding-like protein 2)
miR156a	TRINITY_DN90116_c0_g1	0.5	1	21	707	726	TGACAGAAGAGAGAGAGCACA	|||||||||||||||||||*|	ACTGTCTTCTCTCTCTCGT-T		NOG139057(S:Function unknown )		NOG139057(SBP domain)				PF03110.11(SBP:SBP domain)	GO:0005634(cellular_component:nucleus); GO:0003677(molecular_function:DNA binding)	gi|731329270|ref|XP_010675500.1|( PREDICTED: squamosa promoter-binding-like protein 4 [Beta vulgaris subsp. vulgaris])	gi|67461548|sp|Q9S758.1|SPL5_ARATH(RecName: Full=Squamosa promoter-binding-like protein 5)
miR166k	TRINITY_DN91558_c0_g3	0.5	1	21	1238	1258	TCCGGACCAGGCTTCATTCCC	||||||||||||||||||||*	AGGCCTGGTCCGAAGTAAGGT		NOG02762(K:Transcription )		NOG02762(Homeobox-leucine zipper protein)	K09338	HD-ZIP		PF01852.16(START:START domain); PF00046.26(Homeobox:Homeobox domain); PF08670.8(MEKHLA:MEKHLA domain)	GO:0005634(cellular_component:nucleus); GO:0003677(molecular_function:DNA binding); GO:0008289(molecular_function:lipid binding)	gi|731359700|ref|XP_010691422.1|( PREDICTED: homeobox-leucine zipper protein ATHB-15-like isoform X1 [Beta vulgaris subsp. vulgaris])	gi|75216693|sp|Q9ZU11.1|ATB15_ARATH(RecName: Full=Homeobox-leucine zipper protein ATHB-15; AltName: Full=HD-ZIP protein ATHB-15; AltName: Full=Homeodomain transcription factor ATHB-15; AltName: Full=Protein CORONA; AltName: Full=Protein INCURVATA 4)
miR166k	TRINITY_DN91558_c0_g5	0.5	1	21	1441	1461	TCCGGACCAGGCTTCATTCCC	||||||||||||||||||||*	AGGCCTGGTCCGAAGTAAGGT					K09338	HD-ZIP		PF00046.26(Homeobox:Homeobox domain); PF01852.16(START:START domain); PF00170.18(bZIP_1:bZIP transcription factor)	GO:0005634(cellular_component:nucleus); GO:0003677(molecular_function:DNA binding); GO:0008289(molecular_function:lipid binding)	gi|902170490|gb|KNA07846.1|( hypothetical protein SOVF_168070 [Spinacia oleracea])	gi|75220729|sp|Q39123.1|ATHB8_ARATH(RecName: Full=Homeobox-leucine zipper protein ATHB-8; AltName: Full=HD-ZIP protein ATHB-8; AltName: Full=Homeodomain transcription factor ATHB-8)
miR166k	TRINITY_DN91558_c0_g7	0.5	1	21	1117	1136	TCCGGACCAGGCTTCATTCCC	|||||||||||||||||*|||	AGGCCTGGTCCGAAGTA-GGG		NOG185548(K:Transcription )		NOG185548(MEKHLA domain)	K09338	HD-ZIP		PF08670.8(MEKHLA:MEKHLA domain); PF01852.16(START:START domain); PF00046.26(Homeobox:Homeobox domain)	GO:0030154(biological_process:cell differentiation); GO:0010014(biological_process:meristem initiation); GO:0009956(biological_process:radial pattern formation); GO:0008289(molecular_function:lipid binding); GO:0010051(biological_process:xylem and phloem pattern formation); GO:0009944(biological_process:polarity specification of adaxial/abaxial axis); GO:0044212(molecular_function:transcription r…	gi|731356182|ref|XP_010689538.1|( PREDICTED: homeobox-leucine zipper protein REVOLUTA-like [Beta vulgaris subsp. vulgaris])	gi|75203823|sp|Q9SE43.2|REV_ARATH(RecName: Full=Homeobox-leucine zipper protein REVOLUTA; AltName: Full=HD-ZIP protein REV; AltName: Full=Homeodomain transcription factor REV; AltName: Full=Protein AMPHIVASAL VASCULAR BUNDLE 1; AltName: Full=Protein INTERFASCICULAR FIBERLESS 1)
miR166k	TRINITY_DN91558_c0_g8	0.5	1	21	714	734	TCCGGACCAGGCTTCATTCCC	||||||||||||||||||||*	AGGCCTGGTCCGAAGTAAGGT					K09338	HD-ZIP		PF01852.16(START:START domain); PF00046.26(Homeobox:Homeobox domain)	GO:0005634(cellular_component:nucleus); GO:0003677(molecular_function:DNA binding); GO:0008289(molecular_function:lipid binding)	gi|731317331|ref|XP_010668539.1|( PREDICTED: homeobox-leucine zipper protein ATHB-8-like [Beta vulgaris subsp. vulgaris])	gi|75220729|sp|Q39123.1|ATHB8_ARATH(RecName: Full=Homeobox-leucine zipper protein ATHB-8; AltName: Full=HD-ZIP protein ATHB-8; AltName: Full=Homeodomain transcription factor ATHB-8)
miR172c	TRINITY_DN92408_c1_g1	0.5	1	21	3664	3684	AGAATCTTGATGATGCTGCAG	||||||:||||||||||||||	TCTTAGGACTACTACGACGTC					K09284	AP2		PF00847.17(AP2:AP2 domain)	GO:0007275(biological_process:multicellular organism development); GO:0006355(biological_process:regulation of transcription, DNA-templated); GO:0003677(molecular_function:DNA binding); GO:0003700(molecular_function:transcription factor activity, sequence-specific DNA binding); GO:0005634(cellular_component:nucleus)	gi|944049345|gb|KQJ84986.1|( hypothetical protein BRADI_5g24100 [Brachypodium distachyon])	gi|1351945|sp|P47927.1|AP2_ARATH(RecName: Full=Floral homeotic protein APETALA 2)
miR171c-3p	TRINITY_DN92867_c1_g1	0.5	1	21	639	659	TTGAGCCGTGCCAATATCACG	||||||||||||||||||||*	AACTCGGCACGGTTATAGTGA								PF03514.11(GRAS:GRAS domain family)		gi|902231904|gb|KNA22440.1|( hypothetical protein SOVF_034090 isoform B [Spinacia oleracea])	gi|75100159|sp|O81316.1|SCL6_ARATH(RecName: Full=Scarecrow-like protein 6; Short=AtSCL6; AltName: Full=GRAS family protein 22; Short=AtGRAS-22; AltName: Full=SCL6-IV)
miR403b	TRINITY_DN76131_c0_g1	0.8	1	21	3400	3420	TTAGATTCACGCACAAACTCG	||||||||||||||||||*|:	AATCTAAGTGCGTGTTTGCGT					K11593	ELF2C, AGO		PF02171.14(Piwi:Piwi domain); PF16486.2(ArgoN:N-terminal domain of argonaute); PF02170.19(PAZ:PAZ domain); PF16488.2(ArgoL2:Argonaute linker 2 domain); PF08699.7(ArgoL1:Argonaute linker 1 domain)	GO:0003676(molecular_function:nucleic acid binding)	gi|731365693|ref|XP_010694664.1|( PREDICTED: protein argonaute 2 [Beta vulgaris subsp. vulgaris])	gi|75205505|sp|Q9SHF3.1|AGO2_ARATH(RecName: Full=Protein argonaute 2)
miR169w	TRINITY_DN93270_c2_g2	0.8	1	21	4408	4428	TAGCCAAGGATGACTTGCCCA	:||||||||||||||||||*|	GTCGGTTCCTACTGAACGGCT										gi|731317972|ref|XP_010669470.1|( PREDICTED: uncharacterized protein LOC104886694 [Beta vulgaris subsp. vulgaris])	_
miR169d-5p	TRINITY_DN93270_c2_g2	0.8	1	21	4408	4428	AAGCCAAGGATGACTTGCCGG	*|||||||||||||||||||:	GTCGGTTCCTACTGAACGGCT										gi|731317972|ref|XP_010669470.1|( PREDICTED: uncharacterized protein LOC104886694 [Beta vulgaris subsp. vulgaris])	_
miR169j	TRINITY_DN93270_c2_g2	0.8	1	21	4409	4428	TAGCCAAGGATGACTTGCCTG	:||||||||||||||||||*|	GTCGGTTCCTACTGAACGG-C										gi|731317972|ref|XP_010669470.1|( PREDICTED: uncharacterized protein LOC104886694 [Beta vulgaris subsp. vulgaris])	_
miR156l-5p	TRINITY_DN86227_c0_g1	1	1	21	3802	3821	CGACAGAAGAGAGTGAGCATA	||||||||||||||:||*|||	GCTGTCTTCTCTCATTC-TAT								PF13041.3(PPR_2:PPR repeat family); PF12854.4(PPR_1:PPR repeat); PF01535.17(PPR:PPR repeat); PF13812.3(PPR_3:Pentatricopeptide repeat domain); PF17177.1(PPR_long:Pentacotripeptide-repeat region of PROPR); PF10037.6(MRP-S27:Mitochondrial 28S ribosomal protein S27); PF17049.2(AEP1:ATPase expression protein 1); PF00637.17(Clathrin:Region in Clathrin and VPS); PF01095.16(Pectinesterase:Pectinesterase)		gi|902146131|gb|KNA05033.1|( hypothetical protein SOVF_194150 [Spinacia oleracea])	gi|75170916|sp|Q9FIX3.1|PP407_ARATH(RecName: Full=Pentatricopeptide repeat-containing protein At5g39710; AltName: Full=Protein EMBRYO DEFECTIVE 2745)
miR8175	TRINITY_DN93151_c2_g1	1	1	20	1244	1263	GATCCCCGGCAACGGCGCCA	|||||||||||||||||*|*	CTAGGGGCCGTTGCCGCAGA	COG0193(J:Translation, ribosomal structure and biogenesis )		COG0193(The natural substrate for this enzyme may be peptidyl- tRNAs which drop off the ribosome during protein synthesis (By similarity))		K01056	PTH1, pth, spoVC		PF01195.16(Pept_tRNA_hydro:Peptidyl-tRNA hydrolase)	GO:0004045(molecular_function:aminoacyl-tRNA hydrolase activity)	gi|902201099|gb|KNA13905.1|( hypothetical protein SOVF_112450 [Spinacia oleracea])	gi|134035412|sp|Q8GW64.2|PTHC_ARATH(RecName: Full=Peptidyl-tRNA hydrolase, chloroplastic; AltName: Full=C-PTH; Flags: Precursor)
miR156e	TRINITY_DN84801_c0_g1	1	1	21	1791	1811	TTGACAGAAGATAGAGAGCAC	|||||||||||*|||||||||	AACTGTCTTCTCTCTCTCGTG								PF03110.11(SBP:SBP domain)		gi|731343152|ref|XP_010682751.1|( PREDICTED: squamosa promoter-binding-like protein 2 [Beta vulgaris subsp. vulgaris])	gi|75112353|sp|Q5Z818.1|SPL12_ORYSJ(RecName: Full=Squamosa promoter-binding-like protein 12)
miR156e	TRINITY_DN84801_c0_g2	1	1	21	2300	2320	TTGACAGAAGATAGAGAGCAC	|||||||||||*|||||||||	AACTGTCTTCTCTCTCTCGTG								PF03110.11(SBP:SBP domain)		gi|731343152|ref|XP_010682751.1|( PREDICTED: squamosa promoter-binding-like protein 2 [Beta vulgaris subsp. vulgaris])	gi|67461550|sp|Q9S840.1|SPL2_ARATH(RecName: Full=Squamosa promoter-binding-like protein 2)
miR164f	TRINITY_DN89225_c3_g8	1	1	21	266	286	TGGAGAAGCAGGGCACATGCT	||||||||||||||||*||||	ACCTCTTCGTCCCGTGAACGA										gi|870843012|gb|KMS96284.1|( hypothetical protein BVRB_000470 isoform B [Beta vulgaris subsp. vulgaris])	gi|51316422|sp|Q84TE6.2|NAC22_ARATH(RecName: Full=NAC domain-containing protein 21/22; Short=ANAC021/ANAC022)
miR393a-5p	TRINITY_DN87142_c0_g1	1	1	22	4231	4252	TCCAAAGGGATCGCATTGATCC	||||||||||||||||||*|*|	AGGTTTCCCTAGCGTAACAAAG								PF12937.4(F-box-like:F-box-like)		gi|731343631|ref|XP_010682986.1|( PREDICTED: protein AUXIN SIGNALING F-BOX 2-like [Beta vulgaris subsp. vulgaris])	gi|75264146|sp|Q9LPW7.1|AFB3_ARATH(RecName: Full=Protein AUXIN SIGNALING F-BOX 3)
miR393a-5p	TRINITY_DN87142_c0_g3	1	1	22	46	68	TCCAAAGGGATCGCATTG-ATCC	||||||||||||||||||**|||	AGGTTTCCCTAGCGTAACAGAGG					K14485	TIR1	map04075(Plant hormone signal transduction)		GO:0000822(molecular_function:inositol hexakisphosphate binding); GO:0009734(biological_process:auxin-activated signaling pathway)	gi|902176431|gb|KNA08757.1|( hypothetical protein SOVF_159810 [Spinacia oleracea])	gi|68053009|sp|Q570C0.2|TIR1_ARATH(RecName: Full=Protein TRANSPORT INHIBITOR RESPONSE 1; AltName: Full=Weak ethylene-insensitive protein 1)
miR6470	TRINITY_DN93169_c1_g1	1	1	21	871	891	CTCTGATATCATATTAAAAAA	|||||||||*|||||||||||	GAGACTATAATATAATTTTTT								PF12023.5(DUF3511:Domain of unknown function (DUF3511))		gi|731317888|ref|XP_010669424.1|( PREDICTED: uncharacterized protein LOC104886656 [Beta vulgaris subsp. vulgaris])	_
miR1863a	TRINITY_DN86333_c0_g1	1	1	24	378	401	AGCTCTGATACCATGTTAGATTAG	||||||||||||||||||||*||*	TCGAGACTATGGTACAATCTTATA										gi|922411312|ref|XP_013633179.1|( PREDICTED: uncharacterized mitochondrial protein AtMg00810-like [Brassica oleracea var. oleracea])	gi|45477041|sp|P92519.1|M810_ARATH(RecName: Full=Uncharacterized mitochondrial protein AtMg00810; AltName: Full=ORF240b)
miR156a-5p	TRINITY_DN84801_c0_g1	1	1	20	1791	1810	TGACAGAAGAGAGTGAGCAC	|||||||||||||*||||||	ACTGTCTTCTCTCTCTCGTG								PF03110.11(SBP:SBP domain)		gi|731343152|ref|XP_010682751.1|( PREDICTED: squamosa promoter-binding-like protein 2 [Beta vulgaris subsp. vulgaris])	gi|75112353|sp|Q5Z818.1|SPL12_ORYSJ(RecName: Full=Squamosa promoter-binding-like protein 12)
miR156a-5p	TRINITY_DN84801_c0_g2	1	1	20	2300	2319	TGACAGAAGAGAGTGAGCAC	|||||||||||||*||||||	ACTGTCTTCTCTCTCTCGTG								PF03110.11(SBP:SBP domain)		gi|731343152|ref|XP_010682751.1|( PREDICTED: squamosa promoter-binding-like protein 2 [Beta vulgaris subsp. vulgaris])	gi|67461550|sp|Q9S840.1|SPL2_ARATH(RecName: Full=Squamosa promoter-binding-like protein 2)
miR165a-3p	TRINITY_DN91558_c0_g7	1.2	1	21	1115	1135	TCGGACCAGGCTTCATCCCCC	:||||||||||||||||||**	GGCCTGGTCCGAAGTAGGGTC		NOG185548(K:Transcription )		NOG185548(MEKHLA domain)	K09338	HD-ZIP		PF08670.8(MEKHLA:MEKHLA domain); PF01852.16(START:START domain); PF00046.26(Homeobox:Homeobox domain)	GO:0030154(biological_process:cell differentiation); GO:0010014(biological_process:meristem initiation); GO:0009956(biological_process:radial pattern formation); GO:0008289(molecular_function:lipid binding); GO:0010051(biological_process:xylem and phloem pattern formation); GO:0009944(biological_process:polarity specification of adaxial/abaxial axis); GO:0044212(molecular_function:transcription r…	gi|731356182|ref|XP_010689538.1|( PREDICTED: homeobox-leucine zipper protein REVOLUTA-like [Beta vulgaris subsp. vulgaris])	gi|75203823|sp|Q9SE43.2|REV_ARATH(RecName: Full=Homeobox-leucine zipper protein REVOLUTA; AltName: Full=HD-ZIP protein REV; AltName: Full=Homeodomain transcription factor REV; AltName: Full=Protein AMPHIVASAL VASCULAR BUNDLE 1; AltName: Full=Protein INTERFASCICULAR FIBERLESS 1)
miR159d	TRINITY_DN89557_c1_g5	1.2	1	21	948	968	ATTGGATTGAAGGGAGCTCCG	||||||*|||||||||||||:	TAACCTCACTTCCCTCGAGGT					K09422	MYBP		PF00249.28(Myb_DNA-binding:Myb-like DNA-binding domain); PF13921.3(Myb_DNA-bind_6:Myb-like DNA-binding domain)		gi|731326066|ref|XP_010673830.1|( PREDICTED: transcription factor GAMYB-like [Beta vulgaris subsp. vulgaris])	gi|158512823|sp|A2WW87.1|GAM1_ORYSI(RecName: Full=Transcription factor GAMYB; AltName: Full=OsGAMyb)
miR166n	TRINITY_DN91558_c0_g3	1.2	1	21	1237	1257	TCGGACCAGGCTTCATTCCTT	:||||||||||||||||||**	GGCCTGGTCCGAAGTAAGGTC		NOG02762(K:Transcription )		NOG02762(Homeobox-leucine zipper protein)	K09338	HD-ZIP		PF01852.16(START:START domain); PF00046.26(Homeobox:Homeobox domain); PF08670.8(MEKHLA:MEKHLA domain)	GO:0005634(cellular_component:nucleus); GO:0003677(molecular_function:DNA binding); GO:0008289(molecular_function:lipid binding)	gi|731359700|ref|XP_010691422.1|( PREDICTED: homeobox-leucine zipper protein ATHB-15-like isoform X1 [Beta vulgaris subsp. vulgaris])	gi|75216693|sp|Q9ZU11.1|ATB15_ARATH(RecName: Full=Homeobox-leucine zipper protein ATHB-15; AltName: Full=HD-ZIP protein ATHB-15; AltName: Full=Homeodomain transcription factor ATHB-15; AltName: Full=Protein CORONA; AltName: Full=Protein INCURVATA 4)
miR166n	TRINITY_DN91558_c0_g5	1.2	1	21	1440	1460	TCGGACCAGGCTTCATTCCTT	:||||||||||||||||||**	GGCCTGGTCCGAAGTAAGGTC					K09338	HD-ZIP		PF00046.26(Homeobox:Homeobox domain); PF01852.16(START:START domain); PF00170.18(bZIP_1:bZIP transcription factor)	GO:0005634(cellular_component:nucleus); GO:0003677(molecular_function:DNA binding); GO:0008289(molecular_function:lipid binding)	gi|902170490|gb|KNA07846.1|( hypothetical protein SOVF_168070 [Spinacia oleracea])	gi|75220729|sp|Q39123.1|ATHB8_ARATH(RecName: Full=Homeobox-leucine zipper protein ATHB-8; AltName: Full=HD-ZIP protein ATHB-8; AltName: Full=Homeodomain transcription factor ATHB-8)
miR166n	TRINITY_DN91558_c0_g8	1.2	1	21	713	733	TCGGACCAGGCTTCATTCCTT	:||||||||||||||||||**	GGCCTGGTCCGAAGTAAGGTC					K09338	HD-ZIP		PF01852.16(START:START domain); PF00046.26(Homeobox:Homeobox domain)	GO:0005634(cellular_component:nucleus); GO:0003677(molecular_function:DNA binding); GO:0008289(molecular_function:lipid binding)	gi|731317331|ref|XP_010668539.1|( PREDICTED: homeobox-leucine zipper protein ATHB-8-like [Beta vulgaris subsp. vulgaris])	gi|75220729|sp|Q39123.1|ATHB8_ARATH(RecName: Full=Homeobox-leucine zipper protein ATHB-8; AltName: Full=HD-ZIP protein ATHB-8; AltName: Full=Homeodomain transcription factor ATHB-8)
miR171c-5p	TRINITY_DN87936_c1_g5	1.2	1	21	1336	1356	GGATATTGGTGCGGTTCAATC	:||||||||:||||:||||||	TCTATAACCGCGCCGAGTTAG								PF03514.11(GRAS:GRAS domain family)		gi|902231903|gb|KNA22439.1|( hypothetical protein SOVF_034090 isoform A [Spinacia oleracea])	gi|75100159|sp|O81316.1|SCL6_ARATH(RecName: Full=Scarecrow-like protein 6; Short=AtSCL6; AltName: Full=GRAS family protein 22; Short=AtGRAS-22; AltName: Full=SCL6-IV)
miR171c-5p	TRINITY_DN87936_c1_g8	1.2	1	21	1775	1795	GGATATTGGTGCGGTTCAATC	:||||||||:||||:||||||	TCTATAACCGCGCCGAGTTAG								PF03514.11(GRAS:GRAS domain family)	GO:0006351(biological_process:transcription, DNA-templated)	gi|902231903|gb|KNA22439.1|( hypothetical protein SOVF_034090 isoform A [Spinacia oleracea])	gi|75100159|sp|O81316.1|SCL6_ARATH(RecName: Full=Scarecrow-like protein 6; Short=AtSCL6; AltName: Full=GRAS family protein 22; Short=AtGRAS-22; AltName: Full=SCL6-IV)
miR319a-3p.2-3p	TRINITY_DN89893_c1_g2	1.2	1	20	1390	1409	TTGGACTGAAGGGTGCTCCC	:|||||||||||||:||||*	GACCTGACTTCCCATGAGGA								PF03634.10(TCP:TCP family transcription factor)		gi|731356574|ref|XP_010689747.1|( PREDICTED: transcription factor TCP4-like [Beta vulgaris subsp. vulgaris])	gi|75157409|sp|Q8LPR5.1|TCP4_ARATH(RecName: Full=Transcription factor TCP4; AltName: Full=Protein MATERNAL EFFECT EMBRYO ARREST 35)
miR319b-5p	TRINITY_DN83149_c0_g1	1.2	1	21	1010	1029	GAGCTTTCTTTAGTCCACTCA	:|||:||||||||||||*|||	TTCGGAAGAAATCAGGT-AGT					K10736	MCM10		PF09329.8(zf-primase:Primase zinc finger)	GO:0005634(cellular_component:nucleus); GO:0006260(biological_process:DNA replication)	gi|902206737|gb|KNA15555.1|( hypothetical protein SOVF_097080 [Spinacia oleracea])	gi|126215747|sp|Q5EAW4.2|MCM10_XENLA(RecName: Full=Protein MCM10 homolog)
miR396b-3p	TRINITY_DN86509_c3_g2	1.2	1	21	58	78	GCTCAAGAAAGCTGTGGGAAA	|*|||||||||||||||:|||	CAAGTTCTTTCGACACCTTTT										gi|694404587|ref|XP_009377167.1|( PREDICTED: serine/threonine-protein phosphatase 7 long form homolog [Pyrus x bretschneideri])	_
miR399h	TRINITY_DN86988_c0_g5	1.2	1	21	1864	1884	TGCCAAAGGAGACTTGCCCAG	:|||||||:||||||||||*|	GCGGTTTCTTCTGAACGGGAC								PF10914.5(DUF2781:Protein of unknown function (DUF2781))	GO:0016020(cellular_component:membrane)	gi|902152673|gb|KNA05625.1|( hypothetical protein SOVF_188630 [Spinacia oleracea])	gi|82182937|sp|Q6DFQ5.1|TMM97_XENTR(RecName: Full=Transmembrane protein 97)
miR172b	TRINITY_DN92408_c1_g1	1.2	1	21	3664	3684	GGAATCTTGATGATGCTGCAT	:|||||:|||||||||||||*	TCTTAGGACTACTACGACGTC					K09284	AP2		PF00847.17(AP2:AP2 domain)	GO:0007275(biological_process:multicellular organism development); GO:0006355(biological_process:regulation of transcription, DNA-templated); GO:0003677(molecular_function:DNA binding); GO:0003700(molecular_function:transcription factor activity, sequence-specific DNA binding); GO:0005634(cellular_component:nucleus)	gi|944049345|gb|KQJ84986.1|( hypothetical protein BRADI_5g24100 [Brachypodium distachyon])	gi|1351945|sp|P47927.1|AP2_ARATH(RecName: Full=Floral homeotic protein APETALA 2)
miR166a-3p	TRINITY_DN91558_c0_g3	1.2	1	21	1237	1257	TCGGACCAGGCTTCATTCCCC	:||||||||||||||||||**	GGCCTGGTCCGAAGTAAGGTC		NOG02762(K:Transcription )		NOG02762(Homeobox-leucine zipper protein)	K09338	HD-ZIP		PF01852.16(START:START domain); PF00046.26(Homeobox:Homeobox domain); PF08670.8(MEKHLA:MEKHLA domain)	GO:0005634(cellular_component:nucleus); GO:0003677(molecular_function:DNA binding); GO:0008289(molecular_function:lipid binding)	gi|731359700|ref|XP_010691422.1|( PREDICTED: homeobox-leucine zipper protein ATHB-15-like isoform X1 [Beta vulgaris subsp. vulgaris])	gi|75216693|sp|Q9ZU11.1|ATB15_ARATH(RecName: Full=Homeobox-leucine zipper protein ATHB-15; AltName: Full=HD-ZIP protein ATHB-15; AltName: Full=Homeodomain transcription factor ATHB-15; AltName: Full=Protein CORONA; AltName: Full=Protein INCURVATA 4)
miR166a-3p	TRINITY_DN91558_c0_g5	1.2	1	21	1440	1460	TCGGACCAGGCTTCATTCCCC	:||||||||||||||||||**	GGCCTGGTCCGAAGTAAGGTC					K09338	HD-ZIP		PF00046.26(Homeobox:Homeobox domain); PF01852.16(START:START domain); PF00170.18(bZIP_1:bZIP transcription factor)	GO:0005634(cellular_component:nucleus); GO:0003677(molecular_function:DNA binding); GO:0008289(molecular_function:lipid binding)	gi|902170490|gb|KNA07846.1|( hypothetical protein SOVF_168070 [Spinacia oleracea])	gi|75220729|sp|Q39123.1|ATHB8_ARATH(RecName: Full=Homeobox-leucine zipper protein ATHB-8; AltName: Full=HD-ZIP protein ATHB-8; AltName: Full=Homeodomain transcription factor ATHB-8)
miR166a-3p	TRINITY_DN91558_c0_g8	1.2	1	21	713	733	TCGGACCAGGCTTCATTCCCC	:||||||||||||||||||**	GGCCTGGTCCGAAGTAAGGTC					K09338	HD-ZIP		PF01852.16(START:START domain); PF00046.26(Homeobox:Homeobox domain)	GO:0005634(cellular_component:nucleus); GO:0003677(molecular_function:DNA binding); GO:0008289(molecular_function:lipid binding)	gi|731317331|ref|XP_010668539.1|( PREDICTED: homeobox-leucine zipper protein ATHB-8-like [Beta vulgaris subsp. vulgaris])	gi|75220729|sp|Q39123.1|ATHB8_ARATH(RecName: Full=Homeobox-leucine zipper protein ATHB-8; AltName: Full=HD-ZIP protein ATHB-8; AltName: Full=Homeodomain transcription factor ATHB-8)
miR395h	TRINITY_DN93074_c2_g1	1.5	1	21	970	989	ATGAAGTGTTTGGGGGAACTT	|||||||||||||||:|**||	TACTTCACAAACCCCTT-AAA								PF02453.14(Reticulon:Reticulon)	GO:0005783(cellular_component:endoplasmic reticulum); GO:0044425(cellular_component:membrane part)	gi|731311481|ref|XP_010669728.1|( PREDICTED: reticulon-like protein B4 [Beta vulgaris subsp. vulgaris])	gi|75209124|sp|Q9SUR3.1|RTNLA_ARATH(RecName: Full=Reticulon-like protein B1; Short=AtRTNLB1; AltName: Full=VirB2-interacting protein 1)
miR164b	TRINITY_DN89225_c3_g8	1.5	1	21	266	286	TGGAGAAGCAGGGCACGTGCA	||||||||||||||||*|||*	ACCTCTTCGTCCCGTGAACGA										gi|870843012|gb|KMS96284.1|( hypothetical protein BVRB_000470 isoform B [Beta vulgaris subsp. vulgaris])	gi|51316422|sp|Q84TE6.2|NAC22_ARATH(RecName: Full=NAC domain-containing protein 21/22; Short=ANAC021/ANAC022)
miR169d	TRINITY_DN93270_c2_g2	1.5	1	21	4408	4428	TAGCCAAGGATGAATTGCCGG	:||||||||||||*||||||:	GTCGGTTCCTACTGAACGGCT										gi|731317972|ref|XP_010669470.1|( PREDICTED: uncharacterized protein LOC104886694 [Beta vulgaris subsp. vulgaris])	_
miR168a	TRINITY_DN91441_c0_g5	1.5	1	21	1138	1157	TTGCTTGGTGCTGGTCGGGAA	*|||||||||||||||:*|||	TACGAACCACGACCAGT-CTT								PF00076.19(RRM_1:RNA recognition motif. (a.k.a. RRM, RBD, or RNP domain)); PF13893.3(RRM_5:RNA recognition motif. (a.k.a. RRM, RBD, or RNP domain)); PF14605.3(Nup35_RRM_2:Nup53/35/40-type RNA recognition motif); PF16842.2(RRM_occluded:Occluded RNA-recognition motif); PF16367.2(RRM_7:RNA recognition motif)	GO:0097159(molecular_function:organic cyclic compound binding); GO:1901363(molecular_function:heterocyclic compound binding)	gi|731329625|ref|XP_010675694.1|( PREDICTED: polyadenylate-binding protein RBP45 [Beta vulgaris subsp. vulgaris])	gi|75334880|sp|Q9LEB4.1|RBP45_NICPL(RecName: Full=Polyadenylate-binding protein RBP45; Short=Poly(A)-binding protein RBP45; AltName: Full=RNA-binding protein 45; Short=NplRBP45)
miR398a-3p	TRINITY_DN88258_c4_g4	1.5	1	21	245	265	TGTGTTCTCAGGTCACCCCTT	|||||||||||:*||||||||	ACACAAGAGTCTCGTGGGGAA	COG2032(P:Inorganic ion transport and metabolism )		COG2032(Destroys radicals which are normally produced within the cells and which are toxic to biological systems (By similarity))		K04565	SOD1	map04146(Peroxisome)	PF00080.17(Sod_Cu:Copper/zinc superoxide dismutase (SODC))	GO:0005737(cellular_component:cytoplasm); GO:0046872(molecular_function:metal ion binding); GO:0019430(biological_process:removal of superoxide radicals); GO:0004784(molecular_function:superoxide dismutase activity); GO:0055114(biological_process:oxidation-reduction process)	gi|731328262|ref|XP_010674951.1|( PREDICTED: superoxide dismutase [Cu-Zn] [Beta vulgaris subsp. vulgaris])	gi|134628|sp|P22233.1|SODC_SPIOL(RecName: Full=Superoxide dismutase [Cu-Zn])
miR319a-3p.2-3p	TRINITY_DN89893_c1_g1	1.5	1	20	897	916	TTGGACTGAAGGGTGCTCCC	||||||||||||||:|:||*	AACCTGACTTCCCATGGGGA								PF03634.10(TCP:TCP family transcription factor)		gi|731356574|ref|XP_010689747.1|( PREDICTED: transcription factor TCP4-like [Beta vulgaris subsp. vulgaris])	gi|75157409|sp|Q8LPR5.1|TCP4_ARATH(RecName: Full=Transcription factor TCP4; AltName: Full=Protein MATERNAL EFFECT EMBRYO ARREST 35)
miR169w	TRINITY_DN85133_c0_g1	1.5	1	21	1870	1889	TAGCCAAGGATGACTTGCCCA	*|||||||||||||||*||||	CTCGGTTCCTACTGAA-GGGT					K08064	NFYA		PF02045.12(CBFB_NFYA:CCAAT-binding transcription factor (CBF-B/NF-YA) subunit B)		gi|731348126|ref|XP_010685336.1|( PREDICTED: nuclear transcription factor Y subunit A-3 [Beta vulgaris subsp. vulgaris])	gi|75213441|sp|Q9SYH4.1|NFYA5_ARATH(RecName: Full=Nuclear transcription factor Y subunit A-5; Short=AtNF-YA-5)
miR397b	TRINITY_DN84866_c0_g1	1.5	1	21	707	727	CCATTGAGTGCAGCGTTGATG	**|||||||||||||||||||	ACTAACTCACGTCGCAACTAC	COG2132(Q:Secondary metabolites biosynthesis, transport and catabolism )		COG2132(Multicopper oxidase)		K05909	E1.10.3.2		PF07732.12(Cu-oxidase_3:Multicopper oxidase); PF00394.19(Cu-oxidase:Multicopper oxidase); PF07731.11(Cu-oxidase_2:Multicopper oxidase)	GO:0005507(molecular_function:copper ion binding); GO:0052716(molecular_function:hydroquinone:oxygen oxidoreductase activity); GO:0048046(cellular_component:apoplast); GO:0046274(biological_process:lignin catabolic process); GO:0055114(biological_process:oxidation-reduction process)	gi|731349224|ref|XP_010685887.1|( PREDICTED: laccase-3-like [Beta vulgaris subsp. vulgaris])	gi|143344116|sp|Q56YT0.2|LAC3_ARATH(RecName: Full=Laccase-3; AltName: Full=Benzenediol:oxygen oxidoreductase 3; AltName: Full=Diphenol oxidase 3; AltName: Full=Urishiol oxidase 3; Flags: Precursor)
miR1863b	TRINITY_DN86333_c0_g1	1.5	1	24	377	401	AGCTCTGATACCATGTTA-ACTGTT	||||||||||||||||||*|*|:|:	TCGAGACTATGGTACAATCTTATAG										gi|922411312|ref|XP_013633179.1|( PREDICTED: uncharacterized mitochondrial protein AtMg00810-like [Brassica oleracea var. oleracea])	gi|45477041|sp|P92519.1|M810_ARATH(RecName: Full=Uncharacterized mitochondrial protein AtMg00810; AltName: Full=ORF240b)
miR395k	TRINITY_DN83966_c0_g1	1.5	1	21	1045	1065	GTGAAGTGTTTGGGGGAACTC	*||||||||||||:||||*||	AACTTCACAAACCTCCTTTAG								PF13515.3(FUSC_2:Fusaric acid resistance protein-like); PF04632.9(FUSC:Fusaric acid resistance protein family)	GO:0016020(cellular_component:membrane)	gi|731349064|ref|XP_010685806.1|( PREDICTED: uncharacterized protein LOC104900148 [Beta vulgaris subsp. vulgaris])	_
miR828b-5p	TRINITY_DN87568_c2_g3	1.5	1	22	459	480	TCTTGCTCAAATGAGTATTCCA	||:||||||||||||*||||||	AGGACGAGTTTACTCTTAAGGT					K09422	MYBP		PF00249.28(Myb_DNA-binding:Myb-like DNA-binding domain); PF13921.3(Myb_DNA-bind_6:Myb-like DNA-binding domain)	GO:0003677(molecular_function:DNA binding)	gi|1005743107|gb|AMQ23629.1|( myb transcription factor 4 [Silene littorea])	gi|75317981|sp|O22264.1|MYB12_ARATH(RecName: Full=Transcription factor MYB12; AltName: Full=Myb-related protein 12; Short=AtMYB12)
miR171d	TRINITY_DN92867_c1_g1	1.5	1	21	642	662	AGATTGAGCCGCGCCAATATC	*||||||||||*|||||||||	ACTAACTCGGCACGGTTATAG								PF03514.11(GRAS:GRAS domain family)		gi|902231904|gb|KNA22440.1|( hypothetical protein SOVF_034090 isoform B [Spinacia oleracea])	gi|75100159|sp|O81316.1|SCL6_ARATH(RecName: Full=Scarecrow-like protein 6; Short=AtSCL6; AltName: Full=GRAS family protein 22; Short=AtGRAS-22; AltName: Full=SCL6-IV)
miR399e	TRINITY_DN86649_c2_g2	1.5	1	21	1114	1135	CGCCAAAGGAGAGTTGCCCT-C	*|||||||||||:|||||||*|	ACGGTTTCCTCTTAACGGGACG										gi|225463450|ref|XP_002272654.1|( PREDICTED: agamous-like MADS-box protein AGL62 [Vitis vinifera])	_
miR156a	TRINITY_DN69898_c0_g1	1.5	1	21	409	429	TGACAGAAGAGAGAGAGCACA	|*||||||||:||||||||||	AATGTCTTCTTTCTCTCGTGT										gi|731324125|ref|XP_010672800.1|( PREDICTED: zinc finger MYM-type protein 1-like [Beta vulgaris subsp. vulgaris])	gi|74743897|sp|Q5SVZ6.1|ZMYM1_HUMAN(RecName: Full=Zinc finger MYM-type protein 1)
miR156a	TRINITY_DN88782_c0_g1	1.5	1	21	347	367	TGACAGAAGAGAGAGAGCACA	|||||:||||||||:|||*||	ACTGTTTTCTCTCTTTCGCGT								PF00226.28(DnaJ:DnaJ domain)		gi|902227025|gb|KNA20551.1|( hypothetical protein SOVF_051300 [Spinacia oleracea])	gi|67462423|sp|Q9ZSY2.1|DNJ15_ARATH(RecName: Full=Chaperone protein dnaJ 15; Short=AtDjB15; Short=AtJ15; AltName: Full=Protein ALTERED RESPONSE TO GRAVITY; Short=AtARG1)
miR159a	TRINITY_DN91612_c2_g3	1.5	1	21	2000	2020	TTTGGATTGAAGGGAGCTCTA	*|||||*||||||||||||||	TAACCTCACTTCCCTCGAGAT					K09422	MYBP		PF00249.28(Myb_DNA-binding:Myb-like DNA-binding domain); PF13921.3(Myb_DNA-bind_6:Myb-like DNA-binding domain); PF09111.7(SLIDE:SLIDE)		gi|731326066|ref|XP_010673830.1|( PREDICTED: transcription factor GAMYB-like [Beta vulgaris subsp. vulgaris])	gi|158512823|sp|A2WW87.1|GAM1_ORYSI(RecName: Full=Transcription factor GAMYB; AltName: Full=OsGAMyb)
miR169d-5p	TRINITY_DN88802_c2_g1	1.5	1	21	1895	1916	AAGCCAAGGATGACTTGCC-GG	|||||||||||||*|||||*||	TTCGGTTCCTACTCAACGGACC					K08064	NFYA		PF10253.6(PRCC:Mitotic checkpoint regulator, MAD2B-interacting); PF02045.12(CBFB_NFYA:CCAAT-binding transcription factor (CBF-B/NF-YA) subunit B)		gi|902218597|gb|KNA18080.1|( hypothetical protein SOVF_074230 [Spinacia oleracea])	gi|81174954|sp|Q93ZH2.2|NFYA3_ARATH(RecName: Full=Nuclear transcription factor Y subunit A-3; Short=AtNF-YA-3; AltName: Full=Transcriptional activator HAP2C)
miR169d-5p	TRINITY_DN88802_c2_g3	1.5	1	21	2771	2791	AAGCCAAGGATGACTTGCCGG	|||||||||||||*|||||::	TTCGGTTCCTACTCAACGGTT					K08064	NFYA		PF02045.12(CBFB_NFYA:CCAAT-binding transcription factor (CBF-B/NF-YA) subunit B)		gi|902218597|gb|KNA18080.1|( hypothetical protein SOVF_074230 [Spinacia oleracea])	gi|75213441|sp|Q9SYH4.1|NFYA5_ARATH(RecName: Full=Nuclear transcription factor Y subunit A-5; Short=AtNF-YA-5)
miR169d-5p	TRINITY_DN90766_c0_g2	1.5	1	21	1480	1499	AAGCCAAGGATGACTTGCCGG	||||||||||||||||*|*||	TTCGGTTCCTACTGAA-GACC								PF02213.13(GYF:GYF domain); PF00642.21(zf-CCCH:Zinc finger C-x8-C-x5-C-x3-H type (and similar))	GO:0005488(molecular_function:binding)	gi|902231673|gb|KNA22355.1|( hypothetical protein SOVF_034820 isoform B [Spinacia oleracea])	gi|391358194|sp|Q9SIV5.3|C3H19_ARATH(RecName: Full=Zinc finger CCCH domain-containing protein 19; Short=AtC3H19; AltName: Full=Protein Needed for RDR2-independent DNA methylation)
miR172e-5p	TRINITY_DN67913_c0_g1	1.5	1	20	118	137	GCAGCACCATTAAGATTCAC	|||:||||*|||||||||||	CGTTGTGGGAATTCTAAGTG		NOG52433(S:Function unknown )		NOG52433(late embryogenesis abundant protein)				PF03168.10(LEA_2:Late embryogenesis abundant protein)	GO:0009269(biological_process:response to desiccation)	gi|902223593|gb|KNA19500.1|( hypothetical protein SOVF_060410 [Spinacia oleracea])	gi|1170746|sp|P46519.1|LEA14_SOYBN(RecName: Full=Desiccation protectant protein Lea14 homolog)
miR394a-5p	TRINITY_DN120412_c0_g1	1.5	1	20	1606	1625	TTGGCATTCTGTCCACCTCC	|||:|*||||||||||||||	AACTGGAAGACAGGTGGAGG	COG5069(Z:Cytoskeleton )		COG5069(Microtubule associated monoxygenase, calponin and LIM domain containing)		K17276	LCP1, PLS2		PF00307.28(CH:Calponin homology (CH) domain); PF00036.29(EF-hand_1:EF hand); PF13499.3(EF-hand_7:EF-hand domain pair); PF13405.3(EF-hand_6:EF-hand domain); PF13833.3(EF-hand_8:EF-hand domain pair); PF13202.3(EF-hand_5:EF hand); PF11971.5(CAMSAP_CH:CAMSAP CH domain)		gi|747105971|ref|XP_011101264.1|( PREDICTED: fimbrin-5-like [Sesamum indicum])	gi|29840803|sp|Q61233.4|PLSL_MOUSE(RecName: Full=Plastin-2; AltName: Full=65 kDa macrophage protein; AltName: Full=L-plastin; AltName: Full=Lymphocyte cytosolic protein 1; Short=LCP-1; AltName: Full=pp65)
miR8175	TRINITY_DN92116_c1_g4	1.5	1	20	84	103	GATCCCCGGCAACGGCGCCA	**||||||||||||||||||	AAAGGGGCCGTTGCCGCGGT										gi|731314290|ref|XP_010684964.1|( PREDICTED: uncharacterized protein LOC104899463 [Beta vulgaris subsp. vulgaris])	_
miR8175	TRINITY_DN92531_c2_g1	1.5	1	20	1689	1708	GATCCCCGGCAACGGCGCCA	|||||||||||||||||***	CTAGGGGCCGTTGCCGCAAA										gi|992273295|gb|KXG33319.1|( hypothetical protein SORBI_003G288500 [Sorghum bicolor])	_
miR8175	TRINITY_DN92531_c2_g4	1.5	1	20	654	673	GATCCCCGGCAACGGCGCCA	|||||||||||||||||***	CTAGGGGCCGTTGCCGCAAA					K13993	HSP20	map04141(Protein processing in endoplasmic reticulum)	PF00011.18(HSP20:Hsp20/alpha crystallin family)		gi|731359171|ref|XP_010691141.1|( PREDICTED: 26.5 kDa heat shock protein, mitochondrial [Beta vulgaris subsp. vulgaris])	gi|75313824|sp|Q9SSQ8.1|HS26M_ARATH(RecName: Full=26.5 kDa heat shock protein, mitochondrial; Short=AtHsp26.5; Flags: Precursor)
miR8175	TRINITY_DN93151_c2_g7	1.5	1	20	65	84	GATCCCCGGCAACGGCGCCA	|||||||||||||||||***	CTAGGGGCCGTTGCCGCAAA										gi|937930347|dbj|BAT05263.1|( Os08g0387300, partial [Oryza sativa Japonica Group])	_
miR399b	TRINITY_DN86649_c2_g2	1.5	1	21	1115	1135	TGCCAAAGGAGATTTGCCCGG	||||||||||||*||||||*|	ACGGTTTCCTCTTAACGGGAC										gi|225463450|ref|XP_002272654.1|( PREDICTED: agamous-like MADS-box protein AGL62 [Vitis vinifera])	_
miR399h	TRINITY_DN86649_c2_g2	1.5	1	21	1115	1135	TGCCAAAGGAGACTTGCCCAG	||||||||||||*||||||*|	ACGGTTTCCTCTTAACGGGAC										gi|225463450|ref|XP_002272654.1|( PREDICTED: agamous-like MADS-box protein AGL62 [Vitis vinifera])	_
miR172c	TRINITY_DN85978_c0_g1	1.5	1	21	2464	2484	AGAATCTTGATGATGCTGCAG	|||||||||||||||||***|	TCTTAGAACTACTACGAGAGC								PF13516.3(LRR_6:Leucine Rich repeat); PF00646.30(F-box:F-box domain); PF12937.4(F-box-like:F-box-like)		gi|902206717|gb|KNA15549.1|( hypothetical protein SOVF_097350 [Spinacia oleracea])	gi|75267749|sp|Q9ZPE4.1|FBW2_ARATH(RecName: Full=F-box protein FBW2; AltName: Full=SKP1-interacting partner 18)
miR171c-3p	TRINITY_DN87736_c6_g2	1.5	1	21	1520	1540	TTGAGCCGTGCCAATATCACG	:|*|||||||||||||||||:	GAGTCGGCACGGTTATAGTGT	COG2133(G:Carbohydrate transport and metabolism )		COG2133(Dehydrogenase)					PF07995.8(GSDH:Glucose / Sorbosone dehydrogenase)	GO:0016901(molecular_function:oxidoreductase activity, acting on the CH-OH group of donors, quinone or similar compound as acceptor); GO:0055114(biological_process:oxidation-reduction process); GO:0005975(biological_process:carbohydrate metabolic process); GO:0048038(molecular_function:quinone binding)	gi|902207025|gb|KNA15602.1|( hypothetical protein SOVF_096770 [Spinacia oleracea])	gi|34395733|sp|Q9SSG3.2|HIPL1_ARATH(RecName: Full=HIPL1 protein; Flags: Precursor)
miR171a	TRINITY_DN92867_c1_g1	1.5	1	21	638	658	TGAGCCGCGCCAATATCACAT	|||||||*|||||||||||*|	ACTCGGCACGGTTATAGTGAA								PF03514.11(GRAS:GRAS domain family)		gi|902231904|gb|KNA22440.1|( hypothetical protein SOVF_034090 isoform B [Spinacia oleracea])	gi|75100159|sp|O81316.1|SCL6_ARATH(RecName: Full=Scarecrow-like protein 6; Short=AtSCL6; AltName: Full=GRAS family protein 22; Short=AtGRAS-22; AltName: Full=SCL6-IV)
miR169j	TRINITY_DN88802_c2_g1	1.5	1	21	1896	1916	TAGCCAAGGATGACTTGCCTG	*||||||||||||*|||||||	TTCGGTTCCTACTCAACGGAC					K08064	NFYA		PF10253.6(PRCC:Mitotic checkpoint regulator, MAD2B-interacting); PF02045.12(CBFB_NFYA:CCAAT-binding transcription factor (CBF-B/NF-YA) subunit B)		gi|902218597|gb|KNA18080.1|( hypothetical protein SOVF_074230 [Spinacia oleracea])	gi|81174954|sp|Q93ZH2.2|NFYA3_ARATH(RecName: Full=Nuclear transcription factor Y subunit A-3; Short=AtNF-YA-3; AltName: Full=Transcriptional activator HAP2C)
miR156a-5p	TRINITY_DN90116_c0_g1	1.5	1	20	707	726	TGACAGAAGAGAGTGAGCAC	|||||||||||||*|||||*	ACTGTCTTCTCTCTCTCGTT		NOG139057(S:Function unknown )		NOG139057(SBP domain)				PF03110.11(SBP:SBP domain)	GO:0005634(cellular_component:nucleus); GO:0003677(molecular_function:DNA binding)	gi|731329270|ref|XP_010675500.1|( PREDICTED: squamosa promoter-binding-like protein 4 [Beta vulgaris subsp. vulgaris])	gi|67461548|sp|Q9S758.1|SPL5_ARATH(RecName: Full=Squamosa promoter-binding-like protein 5)
miR156a-5p	TRINITY_DN90116_c2_g6	1.5	1	20	932	951	TGACAGAAGAGAGTGAGCAC	|||||||||||||::||||*	ACTGTCTTCTCTCGTTCGTT								PF03110.11(SBP:SBP domain)		gi|731329270|ref|XP_010675500.1|( PREDICTED: squamosa promoter-binding-like protein 4 [Beta vulgaris subsp. vulgaris])	gi|6094241|sp|Q38740.1|SBP2_ANTMA(RecName: Full=Squamosa promoter-binding protein 2)
miR396a-3p	TRINITY_DN86509_c3_g2	1.5	1	21	58	78	GTTCAATAAAGCTGTGGGAAG	||||||*||||||||||:||:	CAAGTTCTTTCGACACCTTTT										gi|694404587|ref|XP_009377167.1|( PREDICTED: serine/threonine-protein phosphatase 7 long form homolog [Pyrus x bretschneideri])	_
miR395h	TRINITY_DN83966_c0_g1	1.8	1	21	1045	1065	ATGAAGTGTTTGGGGGAACTT	*||||||||||||:||||*|:	AACTTCACAAACCTCCTTTAG								PF13515.3(FUSC_2:Fusaric acid resistance protein-like); PF04632.9(FUSC:Fusaric acid resistance protein family)	GO:0016020(cellular_component:membrane)	gi|731349064|ref|XP_010685806.1|( PREDICTED: uncharacterized protein LOC104900148 [Beta vulgaris subsp. vulgaris])	_
miR159d	TRINITY_DN91612_c2_g3	1.8	1	21	2000	2020	ATTGGATTGAAGGGAGCTCCG	||||||*||||||||||||*:	TAACCTCACTTCCCTCGAGAT					K09422	MYBP		PF00249.28(Myb_DNA-binding:Myb-like DNA-binding domain); PF13921.3(Myb_DNA-bind_6:Myb-like DNA-binding domain); PF09111.7(SLIDE:SLIDE)		gi|731326066|ref|XP_010673830.1|( PREDICTED: transcription factor GAMYB-like [Beta vulgaris subsp. vulgaris])	gi|158512823|sp|A2WW87.1|GAM1_ORYSI(RecName: Full=Transcription factor GAMYB; AltName: Full=OsGAMyb)
miR166n	TRINITY_DN91558_c0_g7	1.8	1	21	1115	1135	TCGGACCAGGCTTCATTCCTT	:|||||||||||||||:||**	GGCCTGGTCCGAAGTAGGGTC		NOG185548(K:Transcription )		NOG185548(MEKHLA domain)	K09338	HD-ZIP		PF08670.8(MEKHLA:MEKHLA domain); PF01852.16(START:START domain); PF00046.26(Homeobox:Homeobox domain)	GO:0030154(biological_process:cell differentiation); GO:0010014(biological_process:meristem initiation); GO:0009956(biological_process:radial pattern formation); GO:0008289(molecular_function:lipid binding); GO:0010051(biological_process:xylem and phloem pattern formation); GO:0009944(biological_process:polarity specification of adaxial/abaxial axis); GO:0044212(molecular_function:transcription r…	gi|731356182|ref|XP_010689538.1|( PREDICTED: homeobox-leucine zipper protein REVOLUTA-like [Beta vulgaris subsp. vulgaris])	gi|75203823|sp|Q9SE43.2|REV_ARATH(RecName: Full=Homeobox-leucine zipper protein REVOLUTA; AltName: Full=HD-ZIP protein REV; AltName: Full=Homeodomain transcription factor REV; AltName: Full=Protein AMPHIVASAL VASCULAR BUNDLE 1; AltName: Full=Protein INTERFASCICULAR FIBERLESS 1)
miR319a	TRINITY_DN90304_c1_g3	1.8	1	21	1479	1499	TTGGACTGAAGGGAGCTCCCT	|||||||||||||*:|||||:	AACCTGACTTCCCATGAGGGG								PF03634.10(TCP:TCP family transcription factor); PF03732.14(Retrotrans_gag:Retrotransposon gag protein)		gi|731356574|ref|XP_010689747.1|( PREDICTED: transcription factor TCP4-like [Beta vulgaris subsp. vulgaris])	gi|75157409|sp|Q8LPR5.1|TCP4_ARATH(RecName: Full=Transcription factor TCP4; AltName: Full=Protein MATERNAL EFFECT EMBRYO ARREST 35)
miR1863b	TRINITY_DN92262_c2_g1	1.8	1	24	633	657	AGCTCTGATACCATGTTAACTGT-T	*||||||||||||||||||*|:|*|	ACGAGACTATGGTACAATTTATATA								PF13639.3(zf-RING_2:Ring finger domain); PF13923.3(zf-C3HC4_2:Zinc finger, C3HC4 type (RING finger)); PF17123.2(zf-RING_11:RING-like zinc finger); PF12678.4(zf-rbx1:RING-H2 zinc finger domain)	GO:0046872(molecular_function:metal ion binding); GO:0042787(biological_process:protein ubiquitination involved in ubiquitin-dependent protein catabolic process); GO:0000209(biological_process:protein polyubiquitination); GO:0061630(molecular_function:ubiquitin protein ligase activity); GO:0043161(biological_process:proteasome-mediated ubiquitin-dependent protein catabolic process)	gi|731345898|ref|XP_010684164.1|( PREDICTED: E3 ubiquitin-protein ligase SGR9, amyloplastic [Beta vulgaris subsp. vulgaris])	gi|75299582|sp|Q8GXF8.1|SHGR9_ARATH(RecName: Full=E3 ubiquitin-protein ligase SGR9, amyloplastic; AltName: Full=Protein SHOOT GRAVITROPISM 9; Flags: Precursor)
miR399p	TRINITY_DN86988_c0_g5	1.8	1	21	1864	1884	TGCCAAAGGAGAGTTGCCCTG	:|||||||:|||*||||||||	GCGGTTTCTTCTGAACGGGAC								PF10914.5(DUF2781:Protein of unknown function (DUF2781))	GO:0016020(cellular_component:membrane)	gi|902152673|gb|KNA05625.1|( hypothetical protein SOVF_188630 [Spinacia oleracea])	gi|82182937|sp|Q6DFQ5.1|TMM97_XENTR(RecName: Full=Transmembrane protein 97)
miR5077	TRINITY_DN113255_c0_g1	1.8	1	19	787	805	GTTCGCGTCGGGTTCACCA	:|||||||||:||||||**	TAAGCGCAGCTCAAGTGAG	COG0724(R:General function prediction only )		COG0724(Rna-binding protein)		K12890	SFRS1, ASF, SF2	map03040(Spliceosome)	PF00076.19(RRM_1:RNA recognition motif. (a.k.a. RRM, RBD, or RNP domain)); PF08777.8(RRM_3:RNA binding motif); PF16842.2(RRM_occluded:Occluded RNA-recognition motif); PF16367.2(RRM_7:RNA recognition motif)		gi|700189707|gb|KGN44940.1|( hypothetical protein Csa_7G397040 [Cucumis sativus])	gi|56749665|sp|Q9NEW6.2|RSP3_CAEEL(RecName: Full=Probable splicing factor, arginine/serine-rich 3; AltName: Full=CeSF2; AltName: Full=CeSF2/ASF)
miR159a	TRINITY_DN89557_c1_g5	1.8	1	21	948	968	TTTGGATTGAAGGGAGCTCTA	*|||||*||||||||||||:|	TAACCTCACTTCCCTCGAGGT					K09422	MYBP		PF00249.28(Myb_DNA-binding:Myb-like DNA-binding domain); PF13921.3(Myb_DNA-bind_6:Myb-like DNA-binding domain)		gi|731326066|ref|XP_010673830.1|( PREDICTED: transcription factor GAMYB-like [Beta vulgaris subsp. vulgaris])	gi|158512823|sp|A2WW87.1|GAM1_ORYSI(RecName: Full=Transcription factor GAMYB; AltName: Full=OsGAMyb)
miR169d-5p	TRINITY_DN107545_c0_g1	1.8	1	21	183	204	AAGCCAAGGATGACTTGCCG-G	|||||||||||||*|||||:*|	TTCGGTTCCTACTAAACGGTAC					K08064	NFYA				gi|108706462|gb|ABF94257.1|( CCAAT-binding transcription factor subunit B family protein, expressed [Oryza sativa Japonica Group])	_
miR399b	TRINITY_DN86988_c0_g5	1.8	1	21	1864	1884	TGCCAAAGGAGATTTGCCCGG	:|||||||:|||:||||||*|	GCGGTTTCTTCTGAACGGGAC								PF10914.5(DUF2781:Protein of unknown function (DUF2781))	GO:0016020(cellular_component:membrane)	gi|902152673|gb|KNA05625.1|( hypothetical protein SOVF_188630 [Spinacia oleracea])	gi|82182937|sp|Q6DFQ5.1|TMM97_XENTR(RecName: Full=Transmembrane protein 97)
miR399a	TRINITY_DN86988_c0_g5	1.8	1	21	1864	1884	TGCCAAAGGAGAATTGCCCTG	:|||||||:|||*||||||||	GCGGTTTCTTCTGAACGGGAC								PF10914.5(DUF2781:Protein of unknown function (DUF2781))	GO:0016020(cellular_component:membrane)	gi|902152673|gb|KNA05625.1|( hypothetical protein SOVF_188630 [Spinacia oleracea])	gi|82182937|sp|Q6DFQ5.1|TMM97_XENTR(RecName: Full=Transmembrane protein 97)
miR169a-3p	TRINITY_DN29635_c0_g1	1.8	1	20	118	138	GGCAAGTTGTCCTTGGCT-AC	:||||:|||||||||:||*||	TCGTTTAACAGGAACTGACTG										gi|1002245256|ref|XP_015626810.1|( PREDICTED: uncharacterized WD repeat-containing protein C2A9.03 [Oryza sativa Japonica Group])	_
miR169y	TRINITY_DN92989_c2_g1	1.8	1	21	1246	1266	TAGCCATGGATGAATTGCCTG	:||||||||||||*:||||||	GTCGGTACCTACTCGACGGAC					K15032	MTERFD		PF02536.11(mTERF:mTERF); PF00356.18(LacI:Bacterial regulatory proteins, lacI family)		gi|902225666|gb|KNA20139.1|( hypothetical protein SOVF_055130 [Spinacia oleracea])	gi|75182440|sp|Q9M219.1|MTEFH_ARATH(RecName: Full=Transcription termination factor MTEF18, mitochondrial; AltName: Full=Mitochondrial transcription termination factor 18; AltName: Full=Protein SUPPRESSOR OF HOT1-4 1; Flags: Precursor)
miR166i-3p	TRINITY_DN91558_c0_g3	1.8	1	21	1237	1257	TCGGATCAGGCTTCATTCCTC	:||||:|||||||||||||**	GGCCTGGTCCGAAGTAAGGTC		NOG02762(K:Transcription )		NOG02762(Homeobox-leucine zipper protein)	K09338	HD-ZIP		PF01852.16(START:START domain); PF00046.26(Homeobox:Homeobox domain); PF08670.8(MEKHLA:MEKHLA domain)	GO:0005634(cellular_component:nucleus); GO:0003677(molecular_function:DNA binding); GO:0008289(molecular_function:lipid binding)	gi|731359700|ref|XP_010691422.1|( PREDICTED: homeobox-leucine zipper protein ATHB-15-like isoform X1 [Beta vulgaris subsp. vulgaris])	gi|75216693|sp|Q9ZU11.1|ATB15_ARATH(RecName: Full=Homeobox-leucine zipper protein ATHB-15; AltName: Full=HD-ZIP protein ATHB-15; AltName: Full=Homeodomain transcription factor ATHB-15; AltName: Full=Protein CORONA; AltName: Full=Protein INCURVATA 4)
miR166i-3p	TRINITY_DN91558_c0_g5	1.8	1	21	1440	1460	TCGGATCAGGCTTCATTCCTC	:||||:|||||||||||||**	GGCCTGGTCCGAAGTAAGGTC					K09338	HD-ZIP		PF00046.26(Homeobox:Homeobox domain); PF01852.16(START:START domain); PF00170.18(bZIP_1:bZIP transcription factor)	GO:0005634(cellular_component:nucleus); GO:0003677(molecular_function:DNA binding); GO:0008289(molecular_function:lipid binding)	gi|902170490|gb|KNA07846.1|( hypothetical protein SOVF_168070 [Spinacia oleracea])	gi|75220729|sp|Q39123.1|ATHB8_ARATH(RecName: Full=Homeobox-leucine zipper protein ATHB-8; AltName: Full=HD-ZIP protein ATHB-8; AltName: Full=Homeodomain transcription factor ATHB-8)
miR166i-3p	TRINITY_DN91558_c0_g8	1.8	1	21	713	733	TCGGATCAGGCTTCATTCCTC	:||||:|||||||||||||**	GGCCTGGTCCGAAGTAAGGTC					K09338	HD-ZIP		PF01852.16(START:START domain); PF00046.26(Homeobox:Homeobox domain)	GO:0005634(cellular_component:nucleus); GO:0003677(molecular_function:DNA binding); GO:0008289(molecular_function:lipid binding)	gi|731317331|ref|XP_010668539.1|( PREDICTED: homeobox-leucine zipper protein ATHB-8-like [Beta vulgaris subsp. vulgaris])	gi|75220729|sp|Q39123.1|ATHB8_ARATH(RecName: Full=Homeobox-leucine zipper protein ATHB-8; AltName: Full=HD-ZIP protein ATHB-8; AltName: Full=Homeodomain transcription factor ATHB-8)
miR172c	TRINITY_DN92094_c0_g5	1.8	1	21	1948	1967	AGAATCTTGATGATGCTGCAG	||||||||||||*||||*||:	TCTTAGAACTACAACGA-GTT					K17491	SMEK, PPP4R3		PF04802.12(SMK-1:Component of IIS longevity pathway SMK-1)		gi|902208061|gb|KNA15844.1|( hypothetical protein SOVF_094540 [Spinacia oleracea])	gi|82184832|sp|Q6INN7.1|PP4R3_XENLA(RecName: Full=Serine/threonine-protein phosphatase 4 regulatory subunit 3; AltName: Full=SMEK homolog 1)
miR160d-5p	TRINITY_DN86715_c5_g3	1.8	1	21	195	215	TGCCTGGCTCCCTGTATGCCA	:||||||||*||||||||||*	GCGGACCGAAGGACATACGGA										gi|731363367|ref|XP_010693396.1|( PREDICTED: auxin response factor 18-like isoform X2 [Beta vulgaris subsp. vulgaris])	gi|75253259|sp|Q653H7.1|ARFR_ORYSJ(RecName: Full=Auxin response factor 18; AltName: Full=OsARF10)
miR171c-3p	TRINITY_DN81279_c0_g2	1.8	1	21	542	562	TTGAGCCGTGCCAATATCACG	|||||||:|:|||||||||*:	AACTCGGTATGGTTATAGTTT								PF04398.9(DUF538:Protein of unknown function, DUF538)		gi|731365020|ref|XP_010694296.1|( PREDICTED: uncharacterized protein At5g01610 [Beta vulgaris subsp. vulgaris])	gi|75181387|sp|Q9M015.1|Y5161_ARATH(RecName: Full=Uncharacterized protein At5g01610)
miR1863a	TRINITY_DN92262_c2_g1	1.8	1	24	633	657	AGCTCTGATACCATGTTAGAT-TAG	*|||||||||||||||||:||*||*	ACGAGACTATGGTACAATTTATATA								PF13639.3(zf-RING_2:Ring finger domain); PF13923.3(zf-C3HC4_2:Zinc finger, C3HC4 type (RING finger)); PF17123.2(zf-RING_11:RING-like zinc finger); PF12678.4(zf-rbx1:RING-H2 zinc finger domain)	GO:0046872(molecular_function:metal ion binding); GO:0042787(biological_process:protein ubiquitination involved in ubiquitin-dependent protein catabolic process); GO:0000209(biological_process:protein polyubiquitination); GO:0061630(molecular_function:ubiquitin protein ligase activity); GO:0043161(biological_process:proteasome-mediated ubiquitin-dependent protein catabolic process)	gi|731345898|ref|XP_010684164.1|( PREDICTED: E3 ubiquitin-protein ligase SGR9, amyloplastic [Beta vulgaris subsp. vulgaris])	gi|75299582|sp|Q8GXF8.1|SHGR9_ARATH(RecName: Full=E3 ubiquitin-protein ligase SGR9, amyloplastic; AltName: Full=Protein SHOOT GRAVITROPISM 9; Flags: Precursor)
miR169a	TRINITY_DN88802_c2_g3	1.8	1	21	2771	2791	CAGCCAAGGATGACTTGCCGA	*||||||||||||*|||||:|	TTCGGTTCCTACTCAACGGTT					K08064	NFYA		PF02045.12(CBFB_NFYA:CCAAT-binding transcription factor (CBF-B/NF-YA) subunit B)		gi|902218597|gb|KNA18080.1|( hypothetical protein SOVF_074230 [Spinacia oleracea])	gi|75213441|sp|Q9SYH4.1|NFYA5_ARATH(RecName: Full=Nuclear transcription factor Y subunit A-5; Short=AtNF-YA-5)
miR166a-3p	TRINITY_DN91558_c0_g7	1.8	1	21	1115	1135	TCGGACCAGGCTTCATTCCCC	:|||||||||||||||:||**	GGCCTGGTCCGAAGTAGGGTC		NOG185548(K:Transcription )		NOG185548(MEKHLA domain)	K09338	HD-ZIP		PF08670.8(MEKHLA:MEKHLA domain); PF01852.16(START:START domain); PF00046.26(Homeobox:Homeobox domain)	GO:0030154(biological_process:cell differentiation); GO:0010014(biological_process:meristem initiation); GO:0009956(biological_process:radial pattern formation); GO:0008289(molecular_function:lipid binding); GO:0010051(biological_process:xylem and phloem pattern formation); GO:0009944(biological_process:polarity specification of adaxial/abaxial axis); GO:0044212(molecular_function:transcription r…	gi|731356182|ref|XP_010689538.1|( PREDICTED: homeobox-leucine zipper protein REVOLUTA-like [Beta vulgaris subsp. vulgaris])	gi|75203823|sp|Q9SE43.2|REV_ARATH(RecName: Full=Homeobox-leucine zipper protein REVOLUTA; AltName: Full=HD-ZIP protein REV; AltName: Full=Homeodomain transcription factor REV; AltName: Full=Protein AMPHIVASAL VASCULAR BUNDLE 1; AltName: Full=Protein INTERFASCICULAR FIBERLESS 1)
miR156a-5p	TRINITY_DN86227_c0_g1	1.8	1	20	3801	3821	TGACAGAAGAGAGTGAGC-AC	:|||||||||||||:||**||	GCTGTCTTCTCTCATTCTATG								PF13041.3(PPR_2:PPR repeat family); PF12854.4(PPR_1:PPR repeat); PF01535.17(PPR:PPR repeat); PF13812.3(PPR_3:Pentatricopeptide repeat domain); PF17177.1(PPR_long:Pentacotripeptide-repeat region of PROPR); PF10037.6(MRP-S27:Mitochondrial 28S ribosomal protein S27); PF17049.2(AEP1:ATPase expression protein 1); PF00637.17(Clathrin:Region in Clathrin and VPS); PF01095.16(Pectinesterase:Pectinesterase)		gi|902146131|gb|KNA05033.1|( hypothetical protein SOVF_194150 [Spinacia oleracea])	gi|75170916|sp|Q9FIX3.1|PP407_ARATH(RecName: Full=Pentatricopeptide repeat-containing protein At5g39710; AltName: Full=Protein EMBRYO DEFECTIVE 2745)
miR156a-5p	TRINITY_DN90097_c1_g1	1.8	1	20	588	606	TGACAGAAGAGAGTGAGCAC	:|||||*|||||||||||*|	GCTGTCGTCTCTCACTCG-G	COG0199(J:Translation, ribosomal structure and biogenesis )		COG0199(Binds 16S rRNA, required for the assembly of 30S particles and may also be responsible for determining the conformation of the 16S rRNA at the A site (By similarity))		K02954	RP-S14, MRPS14, rpsN	map03010(Ribosome)	PF00253.18(Ribosomal_S14:Ribosomal protein S14p/S29e)	GO:0005840(cellular_component:ribosome); GO:0003735(molecular_function:structural constituent of ribosome); GO:0006412(biological_process:translation); GO:0005739(cellular_component:mitochondrion)	gi|927682216|gb|ALE29228.1|( ribosomal protein S14 (mitochondrion) [Heuchera parviflora var. saurensis])	gi|134066|sp|P14875.2|RT14_OENBE(RecName: Full=Ribosomal protein S14, mitochondrial (mitochondrion) [Oenothera berteroana])
miR395h	TRINITY_DN86069_c0_g1	2	1	21	2193	2213	ATGAAGTGTTTGGGGGAACTT	*|||||||||||::|||||*|	GACTTCACAAACTTCCTTGCA					K11270	CTF8		PF09696.7(Ctf8:Ctf8); PF00646.30(F-box:F-box domain); PF12937.4(F-box-like:F-box-like)		gi|902235438|gb|KNA23908.1|( hypothetical protein SOVF_019520 [Spinacia oleracea])	gi|75263264|sp|Q9FZE7.1|FB41_ARATH(RecName: Full=Putative F-box protein At1g47702)
miR395h	TRINITY_DN92216_c2_g7	2	1	21	83	103	ATGAAGTGTTTGGGGGAACTT	|||||:|:||||||||||*|*	TACTTTATAAACCCCCTTTAC		NOG01243(R:General function prediction only )		NOG01243(Ankyrin repeat and ibr domain containing)	K11968	ARIH1		PF01485.18(IBR:IBR domain, a half RING-finger domain); PF13923.3(zf-C3HC4_2:Zinc finger, C3HC4 type (RING finger)); PF13445.3(zf-RING_UBOX:RING-type zinc-finger); PF00097.22(zf-C3HC4:Zinc finger, C3HC4 type (RING finger)); PF13639.3(zf-RING_2:Ring finger domain); PF14634.3(zf-RING_5:zinc-RING finger domain)	GO:0016567(biological_process:protein ubiquitination); GO:0008270(molecular_function:zinc ion binding); GO:0004842(molecular_function:ubiquitin-protein transferase activity)	gi|731326159|ref|XP_010673879.1|( PREDICTED: probable E3 ubiquitin-protein ligase ARI8 isoform X1 [Beta vulgaris subsp. vulgaris])	gi|75328048|sp|Q84RR0.1|ARI7_ARATH(RecName: Full=Probable E3 ubiquitin-protein ligase ARI7; AltName: Full=ARIADNE-like protein ARI7; AltName: Full=Protein ariadne homolog 7)
miR156l-5p	TRINITY_DN88058_c0_g1	2	1	21	1602	1622	CGACAGAAGAGAGTGAGCATA	*|||||||||||||||:*|*|	TCTGTCTTCTCTCACTTCTCT	COG0326(O:Posttranslational modification, protein turnover, chaperones )		COG0326(Molecular chaperone. Has ATPase activity (By similarity))		K09487	HSP90B, TRA1	map04626(Plant-pathogen interaction); map04141(Protein processing in endoplasmic reticulum)	PF00183.15(HSP90:Hsp90 protein)	GO:0009306(biological_process:protein secretion); GO:0009414(biological_process:response to water deprivation); GO:0005739(cellular_component:mitochondrion); GO:0006457(biological_process:protein folding); GO:0009651(biological_process:response to salt stress); GO:0010075(biological_process:regulation of meristem growth); GO:0009506(cellular_component:plasmodesma); GO:0005774(cellular_component:v…	gi|1002276318|ref|XP_015642502.1|( PREDICTED: endoplasmin homolog [Oryza sativa Japonica Group])	gi|75337653|sp|Q9STX5.1|ENPL_ARATH(RecName: Full=Endoplasmin homolog; AltName: Full=Glucose-regulated protein 94 homolog; Short=GRP-94 homolog; AltName: Full=Heat shock protein 90-7; Short=AtHSP90.7; Short=AtHsp90-7; AltName: Full=Protein SHEPHERD; Flags: Precursor)
miR156l-5p	TRINITY_DN90116_c0_g1	2	1	21	707	726	CGACAGAAGAGAGTGAGCATA	*||||||||||||*|||||*|	ACTGTCTTCTCTCTCTCGT-T		NOG139057(S:Function unknown )		NOG139057(SBP domain)				PF03110.11(SBP:SBP domain)	GO:0005634(cellular_component:nucleus); GO:0003677(molecular_function:DNA binding)	gi|731329270|ref|XP_010675500.1|( PREDICTED: squamosa promoter-binding-like protein 4 [Beta vulgaris subsp. vulgaris])	gi|67461548|sp|Q9S758.1|SPL5_ARATH(RecName: Full=Squamosa promoter-binding-like protein 5)
miR156l-5p	TRINITY_DN90116_c2_g6	2	1	21	930	951	CGACAGAAGAGAGTGAGC-ATA	*||||||||||||::|||*|||	ACTGTCTTCTCTCGTTCGTTAT								PF03110.11(SBP:SBP domain)		gi|731329270|ref|XP_010675500.1|( PREDICTED: squamosa promoter-binding-like protein 4 [Beta vulgaris subsp. vulgaris])	gi|6094241|sp|Q38740.1|SBP2_ANTMA(RecName: Full=Squamosa promoter-binding protein 2)
miR390b	TRINITY_DN87831_c0_g6	2	1	21	466	485	AAGCTCAGGAGGGATAGCGCC	||||||||:||||||||**|*	TTCGAGTCTTCCCTATC-AGT					K19044	XBAT32_33		PF12796.4(Ank_2:Ankyrin repeats (3 copies)); PF13637.3(Ank_4:Ankyrin repeats (many copies)); PF00023.27(Ank:Ankyrin repeat); PF13606.3(Ank_3:Ankyrin repeat); PF13857.3(Ank_5:Ankyrin repeats (many copies))	GO:0006511(biological_process:ubiquitin-dependent protein catabolic process); GO:0008270(molecular_function:zinc ion binding); GO:0004842(molecular_function:ubiquitin-protein transferase activity); GO:0010311(biological_process:lateral root formation); GO:0010366(biological_process:negative regulation of ethylene biosynthetic process); GO:0051865(biological_process:protein autoubiquitination)	gi|731352756|ref|XP_010687703.1|( PREDICTED: probable E3 ubiquitin-protein ligase XBOS32 [Beta vulgaris subsp. vulgaris])	gi|75324323|sp|Q6NLQ8.1|XB32_ARATH(RecName: Full=E3 ubiquitin-protein ligase XBAT32; AltName: Full=Ankyrin repeat domain and RING finger-containing protein XBAT32; AltName: Full=Protein XB3 homolog 2)
miR169d	TRINITY_DN88802_c2_g1	2	1	21	1895	1916	TAGCCAAGGATGAATTGCC-GG	*||||||||||||*|||||*||	TTCGGTTCCTACTCAACGGACC					K08064	NFYA		PF10253.6(PRCC:Mitotic checkpoint regulator, MAD2B-interacting); PF02045.12(CBFB_NFYA:CCAAT-binding transcription factor (CBF-B/NF-YA) subunit B)		gi|902218597|gb|KNA18080.1|( hypothetical protein SOVF_074230 [Spinacia oleracea])	gi|81174954|sp|Q93ZH2.2|NFYA3_ARATH(RecName: Full=Nuclear transcription factor Y subunit A-3; Short=AtNF-YA-3; AltName: Full=Transcriptional activator HAP2C)
miR169d	TRINITY_DN88802_c2_g3	2	1	21	2771	2791	TAGCCAAGGATGAATTGCCGG	*||||||||||||*|||||::	TTCGGTTCCTACTCAACGGTT					K08064	NFYA		PF02045.12(CBFB_NFYA:CCAAT-binding transcription factor (CBF-B/NF-YA) subunit B)		gi|902218597|gb|KNA18080.1|( hypothetical protein SOVF_074230 [Spinacia oleracea])	gi|75213441|sp|Q9SYH4.1|NFYA5_ARATH(RecName: Full=Nuclear transcription factor Y subunit A-5; Short=AtNF-YA-5)
miR399n	TRINITY_DN86649_c2_g2	2	1	21	1115	1135	TGCCAAAGGAGAGCTGCCCTA	||||||||||||:*||||||*	ACGGTTTCCTCTTAACGGGAC										gi|225463450|ref|XP_002272654.1|( PREDICTED: agamous-like MADS-box protein AGL62 [Vitis vinifera])	_
miR168a	TRINITY_DN78784_c0_g1	2	1	21	1038	1057	TTGCTTGGTGCTGGTCGGGAA	||||||||||||||||***||	AACGAACCACGACCAG-AGTT		NOG12472(R:General function prediction only )		NOG12472(solute carrier family 25 (mitochondrial carrier)				PF00153.24(Mito_carr:Mitochondrial carrier protein)		gi|545362400|ref|XP_005646434.1|( MC family transporter [Coccomyxa subellipsoidea C-169])	gi|2497200|sp|Q04013.1|YHM2_YEAST(RecName: Full=Citrate/oxoglutarate carrier protein; Short=Coc1p; AltName: Full=Mitochondrial DNA replication protein YHM2)
miR5523	TRINITY_DN87120_c0_g1	2	1	22	2231	2252	TGAGGAGGAACATATTTACTAG	||||:||*|||||||||||:|:	ACTCTTCGTTGTATAAATGGTT					K05759	PFN			GO:0003779(molecular_function:actin binding); GO:0005856(cellular_component:cytoskeleton); GO:0005737(cellular_component:cytoplasm)	gi|567868467|ref|XP_006426856.1|( hypothetical protein CICLE_v10026756mg [Citrus clementina])	gi|130975|sp|P25816.1|PROF1_BETPN(RecName: Full=Profilin-1; AltName: Full=Allergen Bet v II; AltName: Full=Pollen allergen Bet v 2; AltName: Allergen=Bet v 2)
miR5523	TRINITY_DN88903_c1_g1	2	1	22	3762	3783	TGAGGAGGAACATATTTACTAG	:|||:|:||||||||||||*|:	GCTCTTTCTTGTATAAATGTTT										gi|902197000|gb|KNA13283.1|( hypothetical protein SOVF_118040 [Spinacia oleracea])	gi|75328978|sp|Q8GYD7.1|AT18C_ARATH(RecName: Full=Autophagy-related protein 18c; Short=AtATG18c)
miR319a	TRINITY_DN85902_c0_g1	2	1	21	3250	3269	TTGGACTGAAGGGAGCTCCCT	*|||||||||||*||||*|||	TACCTGACTTCCATCGA-GGA		NOG04258(S:Function unknown )		NOG04258(Deleted in malignant brain tumors 1)	K13912	DMBT1		PF00431.17(CUB:CUB domain); PF00530.15(SRCR:Scavenger receptor cysteine-rich domain); PF00100.20(Zona_pellucida:Zona pellucida-like domain); PF02408.17(CUB_2:CUB-like domain); PF15494.3(SRCR_2:Scavenger receptor cysteine-rich domain)		gi|552822717|ref|XP_005846189.1|( hypothetical protein CHLNCDRAFT_6829, partial [Chlorella variabilis])	gi|85687557|sp|Q60997.2|DMBT1_MOUSE(RecName: Full=Deleted in malignant brain tumors 1 protein; AltName: Full=Apactin; AltName: Full=CRP-ductin; AltName: Full=Glycoprotein 300; Short=gp300; AltName: Full=Hensin; AltName: Full=Mucin-like glycoprotein; Short=Muclin; AltName: Full=Vomeroglandin; AltName: Full=p80; Flags: Precursor)
miR395c	TRINITY_DN83966_c0_g1	2	1	21	1045	1065	CTGAAGTGTTTGGGGGGACTC	*||||||||||||:||:|*||	AACTTCACAAACCTCCTTTAG								PF13515.3(FUSC_2:Fusaric acid resistance protein-like); PF04632.9(FUSC:Fusaric acid resistance protein family)	GO:0016020(cellular_component:membrane)	gi|731349064|ref|XP_010685806.1|( PREDICTED: uncharacterized protein LOC104900148 [Beta vulgaris subsp. vulgaris])	_
miR395c	TRINITY_DN85475_c0_g1	2	1	21	766	785	CTGAAGTGTTTGGGGGGACTC	||:|||:||||||:||||*||	GATTTCGCAAACCTCCCT-AG					K15216	RRN3, TIFIA		PF05327.8(RRN3:RNA polymerase I specific transcription initiation factor RRN3)		gi|902224234|gb|KNA19733.1|( hypothetical protein SOVF_058790 [Spinacia oleracea])	gi|75040988|sp|Q5R4N9.1|RRN3_PONAB(RecName: Full=RNA polymerase I-specific transcription initiation factor RRN3)
miR396g-5p	TRINITY_DN20295_c0_g1	2	1	21	87	107	TTCCACGGCTTTCTTGAACTT	:||||*|||||:|||||||:|	GAGGTACCGAAGGAACTTGGA											gi|325530057|sp|P0CL20.1|HOGA1_COCIM(RecName: Full=Putative 4-hydroxy-2-oxoglutarate aldolase, mitochondrial; AltName: Full=Dihydrodipicolinate synthase-like; Short=DHDPS-like protein)
miR396g-5p	TRINITY_DN92356_c0_g1	2	1	21	476	495	TTCCACGGCTTTCTTGAACTT	|||||*|||||||||||*|*|	AAGGTACCGAAAGAACT-GTA	COG1859(J:Translation, ribosomal structure and biogenesis )		COG1859(Removes the 2'-phosphate from RNA via an intermediate in which the phosphate is ADP-ribosylated by NAD followed by a presumed transesterification to release the RNA and generate ADP- ribose 1''-2''-cyclic phosphate (APPR P). May function as an ADP- ribosylase (By similarity))		K10669	TRPT1, TPT1		PF01885.13(PTS_2-RNA:RNA 2'-phosphotransferase, Tpt1 / KptA family)	GO:0016772(molecular_function:transferase activity, transferring phosphorus-containing groups); GO:0006388(biological_process:tRNA splicing, via endonucleolytic cleavage and ligation)	gi|731361202|ref|XP_010692228.1|( PREDICTED: tRNA 2'-phosphotransferase 1 isoform X1 [Beta vulgaris subsp. vulgaris])	gi|124053419|sp|Q5EAR5.2|TRPT1_DANRE(RecName: Full=tRNA 2'-phosphotransferase 1)
miR160h	TRINITY_DN85912_c4_g5	2	1	21	2049	2068	TGCCTGGCTCCCTGCATGCCA	||||:|||||||||||:*|*|	ACGGGCCGAGGGACGTG-GCT	COG2939(E:Amino acid transport and metabolism )		COG2939(carboxy-peptidase)		K16296	SCPL-I		PF00450.19(Peptidase_S10:Serine carboxypeptidase)	GO:0004185(molecular_function:serine-type carboxypeptidase activity); GO:0016747(molecular_function:transferase activity, transferring acyl groups other than amino-acyl groups); GO:0005773(cellular_component:vacuole); GO:0019748(biological_process:secondary metabolic process); GO:0005777(cellular_component:peroxisome); GO:0016021(cellular_component:integral component of membrane); GO:0051603(biol…	gi|731335913|ref|XP_010678976.1|( PREDICTED: serine carboxypeptidase-like 20 [Beta vulgaris subsp. vulgaris])	gi|2815493|sp|P07519.4|CBP1_HORVU(RecName: Full=Serine carboxypeptidase 1; AltName: Full=CP-MI; AltName: Full=Carboxypeptidase C; AltName: Full=Serine carboxypeptidase I; Contains: RecName: Full=Serine carboxypeptidase 1 chain A; AltName: Full=Serine carboxypeptidase I chain A; Contains: RecName: Full=Serine carboxypeptidase 1 chain B; AltName: Full=Serine carboxypeptidase I chain B; Flags: Precu…
miR169w	TRINITY_DN107545_c0_g1	2	1	21	185	204	TAGCCAAGGATGACTTGCCCA	*||||||||||||*|||*|||	TTCGGTTCCTACTAAAC-GGT					K08064	NFYA				gi|108706462|gb|ABF94257.1|( CCAAT-binding transcription factor subunit B family protein, expressed [Oryza sativa Japonica Group])	_
miR169w	TRINITY_DN88802_c2_g3	2	1	21	2771	2791	TAGCCAAGGATGACTTGCCCA	*||||||||||||*|||||*|	TTCGGTTCCTACTCAACGGTT					K08064	NFYA		PF02045.12(CBFB_NFYA:CCAAT-binding transcription factor (CBF-B/NF-YA) subunit B)		gi|902218597|gb|KNA18080.1|( hypothetical protein SOVF_074230 [Spinacia oleracea])	gi|75213441|sp|Q9SYH4.1|NFYA5_ARATH(RecName: Full=Nuclear transcription factor Y subunit A-5; Short=AtNF-YA-5)
miR1863b	TRINITY_DN92494_c1_g4	2	1	24	955	978	AGCTCTGATACCATGTTAACTGTT	||||*||||||||||||||*|*||	TCGATACTATGGTACAATTCAAAA								PF13966.3(zf-RVT:zinc-binding in reverse transcriptase)		gi|1012324845|gb|KYP36798.1|( hypothetical protein KK1_042036 [Cajanus cajan])	gi|302393805|sp|Q0WV90.3|TPR1_ARATH(RecName: Full=Topless-related protein 1; AltName: Full=Protein MODIFIER OF SNC1 10)
miR166g-5p	TRINITY_DN86562_c1_g1	2	1	21	2256	2275	GGAATGTTGTCTGGCTCGAGG	|:||||:|||||:|||||*||	CTTTACGACAGATCGAGC-CC								PF06886.8(TPX2:Targeting protein for Xklp2 (TPX2))		gi|731316606|ref|XP_010696215.1|( PREDICTED: uncharacterized protein LOC104908761 isoform X1 [Beta vulgaris subsp. vulgaris])	gi|75165193|sp|Q94C48.1|WDL5_ARATH(RecName: Full=Protein WVD2-like 5)
miR164e	TRINITY_DN122176_c0_g1	2	1	21	202	222	TGGAGAAGCAGGGCACGTGAG	||||:|||||||||*||||*|	ACCTTTTCGTCCCGGGCACCC					K03469	rnhA, RNASEH1	map03030(DNA replication)	PF00075.21(RNase_H:RNase H)			gi|6685892|sp|O83372.1|RNH_TREPA(RecName: Full=Ribonuclease H; Short=RNase H >gi|238689319|sp|B2S2V0.1|RNH_TREPS RecName: Full=Ribonuclease H; Short=RNase H)
miR164e	TRINITY_DN88902_c3_g2	2	1	21	3628	3647	TGGAGAAGCAGGGCACGTGAG	:||||||||||||*|||:*||	GCCTCTTCGTCCCATGCG-TC					K17943	PUM		PF07990.9(NABP:Nucleic acid binding protein NABP); PF00806.16(PUF:Pumilio-family RNA binding repeat)	GO:0003723(molecular_function:RNA binding)	gi|902174074|gb|KNA08358.1|( hypothetical protein SOVF_163350 [Spinacia oleracea])	gi|75217075|sp|Q9ZW06.1|PUM2_ARATH(RecName: Full=Pumilio homolog 2; Short=APUM-2; Short=AtPUM2)
miR164e	TRINITY_DN89225_c3_g8	2	1	21	265	286	TGGAGAAGCAGGGCACGTG-AG	||||||||||||||||*||**|	ACCTCTTCGTCCCGTGAACGAC										gi|870843012|gb|KMS96284.1|( hypothetical protein BVRB_000470 isoform B [Beta vulgaris subsp. vulgaris])	gi|51316422|sp|Q84TE6.2|NAC22_ARATH(RecName: Full=NAC domain-containing protein 21/22; Short=ANAC021/ANAC022)
miR164e	TRINITY_DN92256_c1_g4	2	1	21	3115	3134	TGGAGAAGCAGGGCACGTGAG	|||||||||||:|||*||*||	ACCTCTTCGTCTCGTACA-TC					K00963	UGP2, galU, galF	map00520(Amino sugar and nucleotide sugar metabolism); map00040(Pentose and glucuronate interconversions); map00500(Starch and sucrose metabolism); map00052(Galactose metabolism)	PF01704.15(UDPGP:UTP--glucose-1-phosphate uridylyltransferase)	GO:0003983(molecular_function:UTP:glucose-1-phosphate uridylyltransferase activity); GO:0006011(biological_process:UDP-glucose metabolic process)	gi|965665814|dbj|BAT81302.1|( hypothetical protein VIGAN_03098900 [Vigna angularis var. angularis])	gi|136739|sp|P19595.3|UGPA_SOLTU(RecName: Full=UTP--glucose-1-phosphate uridylyltransferase; AltName: Full=UDP-glucose pyrophosphorylase; Short=UDPGP; Short=UGPase)
miR399e	TRINITY_DN86988_c0_g5	2	1	21	1863	1884	CGCCAAAGGAGAGTTGCCCT-C	||||||||:|||*|||||||*|	GCGGTTTCTTCTGAACGGGACG								PF10914.5(DUF2781:Protein of unknown function (DUF2781))	GO:0016020(cellular_component:membrane)	gi|902152673|gb|KNA05625.1|( hypothetical protein SOVF_188630 [Spinacia oleracea])	gi|82182937|sp|Q6DFQ5.1|TMM97_XENTR(RecName: Full=Transmembrane protein 97)
miR156a	TRINITY_DN85556_c3_g2	2	1	21	1000	1020	TGACAGAAGAGAGAGAGCACA	||||||||||*||||||*|*|	ACTGTCTTCTGTCTCTCTTAT		NOG38211(K:Transcription )		NOG38211(MYST Esa1-associated factor 6)	K11344	EAF6		PF09340.7(NuA4:Histone acetyltransferase subunit NuA4)	GO:0000123(cellular_component:histone acetyltransferase complex); GO:0016573(biological_process:histone acetylation)	gi|902159213|gb|KNA06311.1|( hypothetical protein SOVF_182260 [Spinacia oleracea])	gi|82177855|sp|Q52KD8.1|EAF6_XENLA(RecName: Full=Chromatin modification-related protein MEAF6; Short=MYST/Esa1-associated factor 6; AltName: Full=Esa1-associated factor 6 homolog; Short=Protein EAF6 homolog)
miR156a	TRINITY_DN87901_c0_g1	2	1	21	559	578	TGACAGAAGAGAGAGAGCACA	*:||||||:||||||||*|||	TTTGTCTTTTCTCTCTC-TGT									GO:0005789(cellular_component:endoplasmic reticulum membrane); GO:0005773(cellular_component:vacuole); GO:0016485(biological_process:protein processing); GO:0009966(biological_process:regulation of signal transduction); GO:0016021(cellular_component:integral component of membrane)	gi|731348270|ref|XP_010685410.1|( PREDICTED: nicalin-1 [Beta vulgaris subsp. vulgaris])	gi|67460823|sp|Q6NZ07.1|NCLN_DANRE(RecName: Full=Nicalin-1; AltName: Full=Nicastrin-like protein 1; Flags: Precursor)
miR156a	TRINITY_DN88579_c0_g2	2	1	21	1722	1742	TGACAGAAGAGAGAGAGCACA	||||||||:|:|||||:||*|	ACTGTCTTTTTTCTCTTGTTT								PF13041.3(PPR_2:PPR repeat family); PF12854.4(PPR_1:PPR repeat); PF01535.17(PPR:PPR repeat); PF13812.3(PPR_3:Pentatricopeptide repeat domain); PF17177.1(PPR_long:Pentacotripeptide-repeat region of PROPR); PF10037.6(MRP-S27:Mitochondrial 28S ribosomal protein S27); PF03704.14(BTAD:Bacterial transcriptional activator domain)		gi|731350733|ref|XP_010686656.1|( PREDICTED: pentatricopeptide repeat-containing protein At5g64320, mitochondrial [Beta vulgaris subsp. vulgaris])	gi|75171655|sp|Q9FMF6.1|PP444_ARATH(RecName: Full=Pentatricopeptide repeat-containing protein At5g64320, mitochondrial; Flags: Precursor)
miR156a	TRINITY_DN90116_c2_g6	2	1	21	932	951	TGACAGAAGAGAGAGAGCACA	|||||||||||||*:||||*|	ACTGTCTTCTCTCGTTCGT-T								PF03110.11(SBP:SBP domain)		gi|731329270|ref|XP_010675500.1|( PREDICTED: squamosa promoter-binding-like protein 4 [Beta vulgaris subsp. vulgaris])	gi|6094241|sp|Q38740.1|SBP2_ANTMA(RecName: Full=Squamosa promoter-binding protein 2)
miR156a	TRINITY_DN90387_c1_g7	2	1	21	274	294	TGACAGAAGAGAGAGAGCACA	|||||*||||||||||:||*|	ACTGTATTCTCTCTCTTGTAT									GO:0008536(molecular_function:Ran GTPase binding); GO:0005622(cellular_component:intracellular); GO:0006886(biological_process:intracellular protein transport)	gi|731331667|ref|XP_010676780.1|( PREDICTED: importin-11 isoform X1 [Beta vulgaris subsp. vulgaris])	gi|50401199|sp|Q9UI26.1|IPO11_HUMAN(RecName: Full=Importin-11; Short=Imp11; AltName: Full=Ran-binding protein 11; Short=RanBP11)
miR164c	TRINITY_DN89225_c3_g8	2	1	21	266	286	TGGAGAAGCAGGGTACGTGCA	|||||||||||||:||*|||*	ACCTCTTCGTCCCGTGAACGA										gi|870843012|gb|KMS96284.1|( hypothetical protein BVRB_000470 isoform B [Beta vulgaris subsp. vulgaris])	gi|51316422|sp|Q84TE6.2|NAC22_ARATH(RecName: Full=NAC domain-containing protein 21/22; Short=ANAC021/ANAC022)
miR159a	TRINITY_DN89130_c0_g1	2	1	21	422	442	TTTGGATTGAAGGGAGCTCTA	||||||||||||:||:|**||	AAACCTAACTTCTCTTGTAAT								PF05637.9(Glyco_transf_34:galactosyl transferase GMA12/MNN10 family)	GO:0016740(molecular_function:transferase activity); GO:0016020(cellular_component:membrane)	gi|731337198|ref|XP_010679659.1|( PREDICTED: putative glycosyltransferase 7 [Beta vulgaris subsp. vulgaris])	gi|46576210|sp|O81007.1|GT7_ARATH(RecName: Full=Putative glycosyltransferase 7; Short=AtGT7)
miR159b-5p	TRINITY_DN88193_c1_g1	2	1	21	1245	1265	GAGCTCCTTGAAGTTCAATGG	*|:|||||||||||||||:*:	GTTGAGGAACTTCAAGTTGGT								PF16845.2(SQAPI:Aspartic acid proteinase inhibitor); PF00031.18(Cystatin:Cystatin domain)	GO:0004869(molecular_function:cysteine-type endopeptidase inhibitor activity); GO:0010951(biological_process:negative regulation of endopeptidase activity)	gi|1035955740|gb|OAY77484.1|( Cysteine proteinase inhibitor 12 [Ananas comosus])	gi|122228720|sp|Q0JNR2.1|CYT12_ORYSJ(RecName: Full=Cysteine proteinase inhibitor 12; AltName: Full=Oryzacystatin XII; Short=OC-XII; AltName: Full=Oryzacystatin-12; Flags: Precursor)
miR167g-3p	TRINITY_DN92844_c0_g1	2	1	21	3644	3664	AGATCATGTGGCAGTTTCACC	*||||||||||||*|||||*|	ACTAGTACACCGTGAAAGTAG								PF00271.28(Helicase_C:Helicase conserved C-terminal domain)	GO:0005524(molecular_function:ATP binding); GO:0008270(molecular_function:zinc ion binding)	gi|731319809|ref|XP_010670471.1|( PREDICTED: F-box protein At3g54460 [Beta vulgaris subsp. vulgaris])	gi|75181828|sp|Q9M1I1.1|FB304_ARATH(RecName: Full=F-box protein At3g54460)
miR159c	TRINITY_DN89557_c1_g5	2	1	21	948	968	TTTGGATTGAAGGGAGCTCCT	*|||||*|||||||||||||*	TAACCTCACTTCCCTCGAGGT					K09422	MYBP		PF00249.28(Myb_DNA-binding:Myb-like DNA-binding domain); PF13921.3(Myb_DNA-bind_6:Myb-like DNA-binding domain)		gi|731326066|ref|XP_010673830.1|( PREDICTED: transcription factor GAMYB-like [Beta vulgaris subsp. vulgaris])	gi|158512823|sp|A2WW87.1|GAM1_ORYSI(RecName: Full=Transcription factor GAMYB; AltName: Full=OsGAMyb)
miR159c	TRINITY_DN91612_c2_g3	2	1	21	2001	2020	TTTGGATTGAAGGGAGCTCCT	*|||||*|||||||||||*||	TAACCTCACTTCCCTCGA-GA					K09422	MYBP		PF00249.28(Myb_DNA-binding:Myb-like DNA-binding domain); PF13921.3(Myb_DNA-bind_6:Myb-like DNA-binding domain); PF09111.7(SLIDE:SLIDE)		gi|731326066|ref|XP_010673830.1|( PREDICTED: transcription factor GAMYB-like [Beta vulgaris subsp. vulgaris])	gi|158512823|sp|A2WW87.1|GAM1_ORYSI(RecName: Full=Transcription factor GAMYB; AltName: Full=OsGAMyb)
miR172e-5p	TRINITY_DN88128_c1_g2	2	1	20	3409	3428	GCAGCACCATTAAGATTCAC	|||*|||||||||||||*|*	CGTGGTGGTAATTCTAATTC								PF13041.3(PPR_2:PPR repeat family); PF01535.17(PPR:PPR repeat); PF12854.4(PPR_1:PPR repeat); PF13812.3(PPR_3:Pentatricopeptide repeat domain); PF17177.1(PPR_long:Pentacotripeptide-repeat region of PROPR); PF03364.17(Polyketide_cyc:Polyketide cyclase / dehydrase and lipid transport)		gi|731353764|ref|XP_010688227.1|( PREDICTED: pentatricopeptide repeat-containing protein At5g18950 [Beta vulgaris subsp. vulgaris])	gi|223635758|sp|Q8GYM2.2|PP393_ARATH(RecName: Full=Pentatricopeptide repeat-containing protein At5g18950)
miR172e-5p	TRINITY_DN93068_c0_g1	2	1	20	1206	1225	GCAGCACCATTAAGATTCAC	|||||||*|||||:|||||*	CGTCGTGATAATTTTAAGTT									GO:0003824(molecular_function:catalytic activity); GO:0008152(biological_process:metabolic process)	gi|590643376|ref|XP_007030786.1|( Phosphoglycerate mutase family protein isoform 1 [Theobroma cacao])	gi|75096915|sp|O04035.2|AT74H_ARATH(RecName: Full=Phosphoglycerate mutase-like protein AT74H; AltName: Full=Protein At-74 homolog; Short=At-74H)
miR172e-5p	TRINITY_DN93068_c0_g1	2	1	20	346	365	GCAGCACCATTAAGATTCAC	|||||||*|||||:|||||*	CGTCGTGATAATTTTAAGTT									GO:0003824(molecular_function:catalytic activity); GO:0008152(biological_process:metabolic process)	gi|590643376|ref|XP_007030786.1|( Phosphoglycerate mutase family protein isoform 1 [Theobroma cacao])	gi|75096915|sp|O04035.2|AT74H_ARATH(RecName: Full=Phosphoglycerate mutase-like protein AT74H; AltName: Full=Protein At-74 homolog; Short=At-74H)
miR8175	TRINITY_DN112280_c0_g1	2	1	20	295	314	GATCCCCGGCAACGGCGCCA	*||||*|||||||||||||*	GTAGGCGCCGTTGCCGCGGC											gi|47117605|sp|Q8WZY3.1|YBG3_NEUCR(RecName: Full=Uncharacterized protein B24G3.190; Flags: Precursor)
miR8175	TRINITY_DN132577_c0_g1	2	1	20	39	58	GATCCCCGGCAACGGCGCCA	|||||||*||||||:||||*	CTAGGGGGCGTTGCTGCGGG											gi|1723742|sp|P50077.1|CCH1_YEAST(RecName: Full=Calcium-channel protein CCH1)
miR8175	TRINITY_DN46369_c0_g1	2	1	20	218	237	GATCCCCGGCAACGGCGCCA	*|||*||||||||:||||||	GTAGCGGCCGTTGTCGCGGT					K04759	feoB		PF07670.11(Gate:Nucleoside recognition)			gi|81317647|sp|Q5XPH7.1|FEOB_LEPBP(RecName: Full=Ferrous iron transport protein B)
miR8175	TRINITY_DN71752_c0_g1	2	1	20	21	40	GATCCCCGGCAACGGCGCCA	|*||*|||||||||||||||	CCAGCGGCCGTTGCCGCGGT								PF05512.8(AWPM-19:AWPM-19-like family)	GO:0016021(cellular_component:integral component of membrane)	gi|1002267212|ref|XP_015637929.1|( PREDICTED: uncharacterized protein LOC4338635 [Oryza sativa Japonica Group])	_
miR156e	TRINITY_DN69898_c0_g1	2	1	21	410	430	TTGACAGAAGATAGAGAGCAC	||*||||||||*|||||||||	AAATGTCTTCTTTCTCTCGTG										gi|731324125|ref|XP_010672800.1|( PREDICTED: zinc finger MYM-type protein 1-like [Beta vulgaris subsp. vulgaris])	gi|74743897|sp|Q5SVZ6.1|ZMYM1_HUMAN(RecName: Full=Zinc finger MYM-type protein 1)
miR156e	TRINITY_DN85556_c3_g2	2	1	21	1001	1021	TTGACAGAAGATAGAGAGCAC	*||||||||||:||||||*|*	CACTGTCTTCTGTCTCTCTTA		NOG38211(K:Transcription )		NOG38211(MYST Esa1-associated factor 6)	K11344	EAF6		PF09340.7(NuA4:Histone acetyltransferase subunit NuA4)	GO:0000123(cellular_component:histone acetyltransferase complex); GO:0016573(biological_process:histone acetylation)	gi|902159213|gb|KNA06311.1|( hypothetical protein SOVF_182260 [Spinacia oleracea])	gi|82177855|sp|Q52KD8.1|EAF6_XENLA(RecName: Full=Chromatin modification-related protein MEAF6; Short=MYST/Esa1-associated factor 6; AltName: Full=Esa1-associated factor 6 homolog; Short=Protein EAF6 homolog)
miR156e	TRINITY_DN90116_c0_g1	2	1	21	707	727	TTGACAGAAGATAGAGAGCAC	*||||||||||*||||||||*	CACTGTCTTCTCTCTCTCGTT		NOG139057(S:Function unknown )		NOG139057(SBP domain)				PF03110.11(SBP:SBP domain)	GO:0005634(cellular_component:nucleus); GO:0003677(molecular_function:DNA binding)	gi|731329270|ref|XP_010675500.1|( PREDICTED: squamosa promoter-binding-like protein 4 [Beta vulgaris subsp. vulgaris])	gi|67461548|sp|Q9S758.1|SPL5_ARATH(RecName: Full=Squamosa promoter-binding-like protein 5)
miR319i	TRINITY_DN86101_c1_g3	2	1	20	991	1010	TTGGGCTGAAGGGAGCTCCC	|||||||||||||*|||**|	AACCCGACTTCCCCCGATAG	COG1022(I:Lipid transport and metabolism )		COG1022(Amp-dependent synthetase and ligase)		K01897	ACSL, fadD	map04146(Peroxisome); map00061(Fatty acid biosynthesis); map00071(Fatty acid degradation)	PF00501.25(AMP-binding:AMP-binding enzyme)	GO:0001676(biological_process:long-chain fatty acid metabolic process); GO:0004467(molecular_function:long-chain fatty acid-CoA ligase activity)	gi|731361535|ref|XP_010692406.1|( PREDICTED: long chain acyl-CoA synthetase 9, chloroplastic [Beta vulgaris subsp. vulgaris])	gi|75169926|sp|Q9CAP8.1|LACS9_ARATH(RecName: Full=Long chain acyl-CoA synthetase 9, chloroplastic)
miR319i	TRINITY_DN89557_c1_g5	2	1	20	948	967	TTGGGCTGAAGGGAGCTCCC	||||:*|||||||||||||*	AACCTCACTTCCCTCGAGGT					K09422	MYBP		PF00249.28(Myb_DNA-binding:Myb-like DNA-binding domain); PF13921.3(Myb_DNA-bind_6:Myb-like DNA-binding domain)		gi|731326066|ref|XP_010673830.1|( PREDICTED: transcription factor GAMYB-like [Beta vulgaris subsp. vulgaris])	gi|158512823|sp|A2WW87.1|GAM1_ORYSI(RecName: Full=Transcription factor GAMYB; AltName: Full=OsGAMyb)
miR319i	TRINITY_DN90304_c1_g3	2	1	20	1480	1499	TTGGGCTGAAGGGAGCTCCC	||||:||||||||*:|||||	AACCTGACTTCCCATGAGGG								PF03634.10(TCP:TCP family transcription factor); PF03732.14(Retrotrans_gag:Retrotransposon gag protein)		gi|731356574|ref|XP_010689747.1|( PREDICTED: transcription factor TCP4-like [Beta vulgaris subsp. vulgaris])	gi|75157409|sp|Q8LPR5.1|TCP4_ARATH(RecName: Full=Transcription factor TCP4; AltName: Full=Protein MATERNAL EFFECT EMBRYO ARREST 35)
miR399a	TRINITY_DN88898_c0_g3	2	1	21	2406	2426	TGCCAAAGGAGAATTGCCCTG	*|||||||||:||||*|||||	TCGGTTTCCTTTTAAGGGGAC	COG0457(R:General function prediction only )		COG0457(repeat-containing protein)		K15176	CTR9		PF07719.14(TPR_2:Tetratricopeptide repeat); PF00515.25(TPR_1:Tetratricopeptide repeat); PF13181.3(TPR_8:Tetratricopeptide repeat); PF13424.3(TPR_12:Tetratricopeptide repeat); PF13431.3(TPR_17:Tetratricopeptide repeat); PF13432.3(TPR_16:Tetratricopeptide repeat); PF13428.3(TPR_14:Tetratricopeptide repeat); PF14559.3(TPR_19:Tetratricopeptide repeat); PF13414.3(TPR_11:TPR repeat); PF13174.3(TPR_6:Te…	GO:0016593(cellular_component:Cdc73/Paf1 complex); GO:0045893(biological_process:positive regulation of transcription, DNA-templated); GO:0051569(biological_process:regulation of histone H3-K4 methylation); GO:0000993(molecular_function:RNA polymerase II core binding); GO:0016020(cellular_component:membrane); GO:0009910(biological_process:negative regulation of flower development)	gi|731372151|ref|XP_010666260.1|( PREDICTED: RNA polymerase-associated protein CTR9 homolog [Beta vulgaris subsp. vulgaris])	gi|817037015|sp|B5X0I6.1|VIP6_ARATH(RecName: Full=Protein CTR9 homolog; AltName: Full=Protein EARLY FLOWERING 8; AltName: Full=Protein VERNALIZATION INDEPENDENCE 6)
miR399a	TRINITY_DN92777_c2_g3	2	1	21	1465	1485	TGCCAAAGGAGAATTGCCCTG	||||*|||||||||:||*|||	ACGGGTTCCTCTTAGCGCGAC					K12412	MCM1		PF00319.15(SRF-TF:SRF-type transcription factor (DNA-binding and dimerisation domain))		gi|971579272|ref|XP_015158921.1|( PREDICTED: agamous-like MADS-box protein AGL62 [Solanum tuberosum])	gi|75313467|sp|Q9SI38.1|ANR1_ARATH(RecName: Full=MADS-box transcription factor ANR1; AltName: Full=Protein AGAMOUS-LIKE 44; AltName: Full=Protein ARABIDOPSIS NITRATE REGULATED 1)
miR169a-3p	TRINITY_DN133825_c0_g1	2	1	20	213	232	GGCAAGTTGTCCTTGGCTAC	||||||:||||||||:||**	CCGTTCGACAGGAACTGACA								PF05817.11(Ribophorin_II:Oligosaccharyltransferase subunit Ribophorin II)			gi|74626929|sp|O74943.1|YJB6_SCHPO(RecName: Full=Uncharacterized protein C553.06; Flags: Precursor)
miR169a-3p	TRINITY_DN85670_c0_g1	2	1	20	1952	1971	GGCAAGTTGTCCTTGGCTAC	:||||::||||||||:|:||	TCGTTTGACAGGAACTGGTG	COG0480(J:Translation, ribosomal structure and biogenesis )		COG0480(Catalyzes the GTP-dependent ribosomal translocation step during translation elongation. During this step, the ribosome changes from the pre-translocational (PRE) to the post- translocational (POST) state as the newly formed A-site-bound peptidyl-tRNA and P-site-bound deacylated tRNA move to the P and E sites, respectively. Catalyzes the coordinated movement of the two tRNA molecules, the …		K02355	fusA, GFM, EFG		PF00009.24(GTP_EFTU:Elongation factor Tu GTP binding domain); PF03764.15(EFG_IV:Elongation factor G, domain IV); PF14492.3(EFG_II:Elongation Factor G, domain II); PF00679.21(EFG_C:Elongation factor G C-terminus); PF03144.22(GTP_EFTU_D2:Elongation factor Tu domain 2); PF16658.2(RF3_C:Class II release factor RF3, C-terminal domain); PF00515.25(TPR_1:Tetratricopeptide repeat); PF07719.14(TPR_2:Tetra…	GO:0003746(molecular_function:translation elongation factor activity); GO:0006414(biological_process:translational elongation); GO:0003924(molecular_function:GTPase activity); GO:0009507(cellular_component:chloroplast); GO:0005525(molecular_function:GTP binding)	gi|731330541|ref|XP_010676186.1|( PREDICTED: elongation factor G-2, chloroplastic [Beta vulgaris subsp. vulgaris])	gi|575773381|sp|P34811.2|EFGC1_SOYBN(RecName: Full=Elongation factor G-1, chloroplastic; Short=cEF-G 1; Flags: Precursor)
miR169y	TRINITY_DN81862_c0_g3	2	1	21	446	465	TAGCCATGGATGAATTGCCTG	*|||||||||||||:||**||	TTCGGTACCTACTTGAC-CAC		NOG83302(S:Function unknown )		NOG83302(Acts as a linker essential in the assembly of a core complex of PRK GAPDH. Coordinates the reversible inactivation of chloroplast enzymes GAPDH and PRK during darkness in photosynthetic tissues)				PF02672.12(CP12:CP12 domain)	GO:0009536(cellular_component:plastid)	gi|125543561|gb|EAY89700.1|( hypothetical protein OsI_11237 [Oryza sativa Indica Group])	gi|75181322|sp|Q9LZP9.1|CP122_ARATH(RecName: Full=Calvin cycle protein CP12-2, chloroplastic; AltName: Full=CP12 domain-containing protein 2; AltName: Full=Chloroplast protein 12-2; Flags: Precursor)
miR169y	TRINITY_DN87068_c2_g3	2	1	21	162	181	TAGCCATGGATGAATTGCCTG	*|||||||||||||||*||*|	TTCGGTACCTACTTAA-GGTC	COG0666(R:General function prediction only )		COG0666(Ankyrin Repeat)					PF12796.4(Ank_2:Ankyrin repeats (3 copies)); PF13637.3(Ank_4:Ankyrin repeats (many copies)); PF13857.3(Ank_5:Ankyrin repeats (many copies)); PF00023.27(Ank:Ankyrin repeat); PF13606.3(Ank_3:Ankyrin repeat)		gi|731350661|ref|XP_010686618.1|( PREDICTED: ankyrin repeat domain-containing protein 2-like [Beta vulgaris subsp. vulgaris])	gi|952543414|sp|Q29Q26.1|AKR2B_ARATH(RecName: Full=Ankyrin repeat domain-containing protein 2B)
miR172c	TRINITY_DN88877_c2_g2	2	1	21	879	898	AGAATCTTGATGATGCTGCAG	||||||*||||||||||*|*|	TCTTAGTACTACTACGA-GCC								PF08323.8(Glyco_transf_5:Starch synthase catalytic domain); PF12718.4(Tropomyosin_1:Tropomyosin like); PF00534.17(Glycos_transf_1:Glycosyl transferases group 1); PF13692.3(Glyco_trans_1_4:Glycosyl transferases group 1)	GO:0004373(molecular_function:glycogen (starch) synthase activity)	gi|731372992|ref|XP_010666511.1|( PREDICTED: probable starch synthase 4, chloroplastic/amyloplastic [Beta vulgaris subsp. vulgaris])	gi|122230204|sp|Q0WVX5.1|SSY4_ARATH(RecName: Full=Probable starch synthase 4, chloroplastic/amyloplastic; Short=AtSS4; AltName: Full=Soluble starch synthase IV; Flags: Precursor)
miR172c	TRINITY_DN90343_c1_g6	2	1	21	2439	2458	AGAATCTTGATGATGCTGCAG	|||||||:||:|||||||**|	TCTTAGAGCTGCTACGAC-AC								PF00514.20(Arm:Armadillo/beta-catenin-like repeat); PF04564.12(U-box:U-box domain); PF04826.10(Arm_2:Armadillo-like)	GO:0044424(cellular_component:intracellular part)	gi|641841563|gb|KDO60475.1|( hypothetical protein CISIN_1g004078mg [Citrus sinensis])	gi|172045742|sp|Q8GWV5.2|PUB3_ARATH(RecName: Full=U-box domain-containing protein 3; AltName: Full=Plant U-box protein 3)
miR390-3p	TRINITY_DN84925_c0_g2	2	1	20	1092	1110	CGCTATCTATCCTGAGCTCC	||||*||||:|||||||*||	GCGACAGATGGGACTCG-GG	COG1635(H:Coenzyme transport and metabolism )		COG1635(Involved in biosynthesis of the thiamine precursor thiazole. Catalyzes the conversion of NAD and glycine to adenosine diphosphate 5-(2-hydroxyethyl)-4-methylthiazole-2-carboxylic acid (ADT), an adenylated thiazole intermediate. The reaction includes an iron-dependent sulfide transfer from a conserved cysteine residue of the protein to a thiazole intermediate. The enzyme can only undergo a…		K03146	THI4, THI1	map00730(Thiamine metabolism)	PF01946.14(Thi4:Thi4 family); PF01266.21(DAO:FAD dependent oxidoreductase); PF13450.3(NAD_binding_8:NAD(P)-binding Rossmann-like domain); PF00890.21(FAD_binding_2:FAD binding domain); PF05834.9(Lycopene_cycl:Lycopene cyclase protein); PF07992.11(Pyr_redox_2:Pyridine nucleotide-disulphide oxidoreductase); PF13454.3(NAD_binding_9:FAD-NAD(P)-binding); PF12831.4(FAD_oxidored:FAD dependent oxidoreduct…	GO:0009228(biological_process:thiamine biosynthetic process); GO:0016491(molecular_function:oxidoreductase activity); GO:0006950(biological_process:response to stress); GO:0052837(biological_process:thiazole biosynthetic process); GO:0009570(cellular_component:chloroplast stroma); GO:0005829(cellular_component:cytosol); GO:0055114(biological_process:oxidation-reduction process)	gi|926781046|ref|XP_013898997.1|( thiamine biosynthetic enzyme [Monoraphidium neglectum])	gi|1351122|sp|P23618.2|THI4_FUSOX(RecName: Full=Thiamine thiazole synthase; AltName: Full=Stress-inducible protein sti35; AltName: Full=Thiazole biosynthetic enzyme >gi|544604719|sp|J9N5G7.1|THI4_FUSO4 RecName: Full=Thiamine thiazole synthase; AltName: Full=Stress-inducible protein sti35; AltName: Full=Thiazole biosynthetic enzyme)
miR6470	TRINITY_DN85611_c0_g1	2	1	21	193	213	CTCTGATATCATATTAAAAAA	*|*||||||||||||||||*|	AATACTATAGTATAATTTTAT								PF10604.6(Polyketide_cyc2:Polyketide cyclase / dehydrase and lipid transport)		gi|567217582|ref|XP_006412420.1|( hypothetical protein EUTSA_v10026440mg [Eutrema salsugineum])	gi|25008713|sp|P59082.1|LFS_ALLCE(RecName: Full=Lachrymatory-factor synthase; Flags: Precursor [Allium cepa])
miR6470	TRINITY_DN89071_c1_g1	2	1	21	1001	1021	CTCTGATATCATATTAAAAAA	||||||||:|||||||*|*||	GAGACTATGGTATAATCTCTT		NOG162323(S:Function unknown )		NOG162323()						gi|731314782|ref|XP_010688421.1|( PREDICTED: uncharacterized protein LOC104902355 isoform X2 [Beta vulgaris subsp. vulgaris])	_
miR6470	TRINITY_DN90651_c3_g1	2	1	21	312	333	CTCTGATATCATATTAAAAA-A	*|||||||||||*|||||||*|	AAGACTATAGTACAATTTTTGT										gi|224096964|ref|XP_002310803.1|( hypothetical protein POPTR_0007s12780g [Populus trichocarpa])	_
miR1863a	TRINITY_DN90620_c1_g1	2	1	24	1075	1098	AGCTCTGATACCATGTTAGATTAG	*|||||||||||||*|||||||*|	ACGAGACTATGGTAGAATCTAAAC								PF14244.3(Retrotran_gag_3:gag-polypeptide of LTR copia-type); PF14223.3(Retrotran_gag_2:gag-polypeptide of LTR copia-type); PF03732.14(Retrotrans_gag:Retrotransposon gag protein)		gi|1025322267|ref|XP_016504136.1|( PREDICTED: uncharacterized protein LOC107822148, partial [Nicotiana tabacum])	_
miR172b	TRINITY_DN84843_c0_g1	2	1	21	835	855	GGAATCTTGATGATGCTGCAT	*|||||*||||||||||:||:	ACTTAGTACTACTACGATGTG								PF07714.14(Pkinase_Tyr:Protein tyrosine kinase); PF00069.22(Pkinase:Protein kinase domain); PF12819.4(Malectin_like:Carbohydrate-binding protein of the ER); PF11721.5(Malectin:Di-glucose binding within endoplasmic reticulum)		gi|902228005|gb|KNA20920.1|( hypothetical protein SOVF_047860 [Spinacia oleracea])	gi|75317972|sp|O22187.1|Y2232_ARATH(RecName: Full=Probable receptor-like protein kinase At2g23200; Flags: Precursor)
miR172b	TRINITY_DN87096_c0_g5	2	1	21	1233	1252	GGAATCTTGATGATGCTGCAT	|:|||||||*|||||||||*|	CTTTAGAACAACTACGACG-A					K03678	RRP45, EXOSC9	map03018(RNA degradation)	PF03725.12(RNase_PH_C:3' exoribonuclease family, domain 2)		gi|731318849|ref|XP_010669943.1|( PREDICTED: protein RRP45A-like isoform X1 [Beta vulgaris subsp. vulgaris])	gi|75182408|sp|Q9M209.1|CER7_ARATH(RecName: Full=Exosome complex component RRP45B; AltName: Full=Protein ECERIFERUM 7; AltName: Full=RNA-processing protein CER7; AltName: Full=RRP45 homolog B; AltName: Full=Ribosomal RNA-processing protein 45B)
miR169a	TRINITY_DN107545_c0_g1	2	1	21	185	204	CAGCCAAGGATGACTTGCCGA	*||||||||||||*|||||*|	TTCGGTTCCTACTAAACGG-T					K08064	NFYA				gi|108706462|gb|ABF94257.1|( CCAAT-binding transcription factor subunit B family protein, expressed [Oryza sativa Japonica Group])	_
miR169a	TRINITY_DN85133_c0_g1	2	1	21	1870	1889	CAGCCAAGGATGACTTGCCGA	*|||||||||||||||*||*|	CTCGGTTCCTACTGAA-GGGT					K08064	NFYA		PF02045.12(CBFB_NFYA:CCAAT-binding transcription factor (CBF-B/NF-YA) subunit B)		gi|731348126|ref|XP_010685336.1|( PREDICTED: nuclear transcription factor Y subunit A-3 [Beta vulgaris subsp. vulgaris])	gi|75213441|sp|Q9SYH4.1|NFYA5_ARATH(RecName: Full=Nuclear transcription factor Y subunit A-5; Short=AtNF-YA-5)
miR169j	TRINITY_DN107545_c0_g1	2	1	21	183	204	TAGCCAAGGATGACTTGCC-TG	*||||||||||||*|||||*||	TTCGGTTCCTACTAAACGGTAC					K08064	NFYA				gi|108706462|gb|ABF94257.1|( CCAAT-binding transcription factor subunit B family protein, expressed [Oryza sativa Japonica Group])	_
miR169j	TRINITY_DN85133_c0_g1	2	1	21	1870	1889	TAGCCAAGGATGACTTGCCTG	*|||||||||||||||*||::	CTCGGTTCCTACTGAA-GGGT					K08064	NFYA		PF02045.12(CBFB_NFYA:CCAAT-binding transcription factor (CBF-B/NF-YA) subunit B)		gi|731348126|ref|XP_010685336.1|( PREDICTED: nuclear transcription factor Y subunit A-3 [Beta vulgaris subsp. vulgaris])	gi|75213441|sp|Q9SYH4.1|NFYA5_ARATH(RecName: Full=Nuclear transcription factor Y subunit A-5; Short=AtNF-YA-5)
miR156a-5p	TRINITY_DN82664_c0_g2	2	1	20	394	413	TGACAGAAGAGAGTGAGCAC	||||||*|||||:|:|||||	ACTGTCGTCTCTTATTCGTG								PF01535.17(PPR:PPR repeat); PF13041.3(PPR_2:PPR repeat family); PF12854.4(PPR_1:PPR repeat); PF13812.3(PPR_3:Pentatricopeptide repeat domain)		gi|729460012|ref|XP_010525245.1|( PREDICTED: pentatricopeptide repeat-containing protein At1g62260, mitochondrial-like [Tarenaya hassleriana])	gi|75213324|sp|Q9SY02.1|PP301_ARATH(RecName: Full=Pentatricopeptide repeat-containing protein At4g02750)
miR156a-5p	TRINITY_DN86720_c0_g1	2	1	20	701	719	TGACAGAAGAGAGTGAGCAC	*|||||||||:|||:||*||	TCTGTCTTCTTTCATTC-TG								PF03140.12(DUF247:Plant protein of unknown function); PF12911.4(OppC_N:N-terminal TM domain of oligopeptide transport permease C)		gi|1021044323|gb|KZN02104.1|( hypothetical protein DCAR_010858 [Daucus carota subsp. sativus])	gi|75203068|sp|Q9SD53.1|Y3720_ARATH(RecName: Full=UPF0481 protein At3g47200)
miR156a-5p	TRINITY_DN88058_c0_g1	2	1	20	1603	1622	TGACAGAAGAGAGTGAGCAC	*|||||||||||||||:*|*	TCTGTCTTCTCTCACTTCTC	COG0326(O:Posttranslational modification, protein turnover, chaperones )		COG0326(Molecular chaperone. Has ATPase activity (By similarity))		K09487	HSP90B, TRA1	map04626(Plant-pathogen interaction); map04141(Protein processing in endoplasmic reticulum)	PF00183.15(HSP90:Hsp90 protein)	GO:0009306(biological_process:protein secretion); GO:0009414(biological_process:response to water deprivation); GO:0005739(cellular_component:mitochondrion); GO:0006457(biological_process:protein folding); GO:0009651(biological_process:response to salt stress); GO:0010075(biological_process:regulation of meristem growth); GO:0009506(cellular_component:plasmodesma); GO:0005774(cellular_component:v…	gi|1002276318|ref|XP_015642502.1|( PREDICTED: endoplasmin homolog [Oryza sativa Japonica Group])	gi|75337653|sp|Q9STX5.1|ENPL_ARATH(RecName: Full=Endoplasmin homolog; AltName: Full=Glucose-regulated protein 94 homolog; Short=GRP-94 homolog; AltName: Full=Heat shock protein 90-7; Short=AtHSP90.7; Short=AtHsp90-7; AltName: Full=Protein SHEPHERD; Flags: Precursor)
miR156a-5p	TRINITY_DN88225_c0_g6	2	1	20	1241	1261	TGACAGAAGAGAGTGAGC-AC	||||||||||||:|||*|*||	ACTGTCTTCTCTTACTAGCTG	COG5068(K:Transcription )		COG5068(Transcription factor)		K09260	MEF2A		PF00319.15(SRF-TF:SRF-type transcription factor (DNA-binding and dimerisation domain)); PF01486.14(K-box:K-box region)	GO:0006355(biological_process:regulation of transcription, DNA-templated); GO:0003700(molecular_function:transcription factor activity, sequence-specific DNA binding); GO:0003677(molecular_function:DNA binding); GO:0046983(molecular_function:protein dimerization activity); GO:0005634(cellular_component:nucleus)	gi|731338456|ref|XP_010680338.1|( PREDICTED: MADS-box protein JOINTLESS [Beta vulgaris subsp. vulgaris])	gi|17433048|sp|Q9FUY6.1|JOIN_SOLLC(RecName: Full=MADS-box protein JOINTLESS; AltName: Full=LeMADS)
miR156a-5p	TRINITY_DN89330_c1_g3	2	1	20	333	353	TGACAGAAGAGAGTGAGC-AC	||||||*|||:|||||||*||	ACTGTCATCTTTCACTCGCTG		NOG26282(R:General function prediction only )		NOG26282(kelch domain containing 8A)				PF01344.22(Kelch_1:Kelch motif); PF13964.3(Kelch_6:Kelch motif); PF07646.12(Kelch_2:Kelch motif); PF13854.3(Kelch_5:Kelch motif); PF13415.3(Kelch_3:Galactose oxidase, central domain); PF13418.3(Kelch_4:Galactose oxidase, central domain); PF00646.30(F-box:F-box domain)		gi|731336091|ref|XP_010679070.1|( PREDICTED: F-box/kelch-repeat protein SKIP30 [Beta vulgaris subsp. vulgaris])	gi|143013636|sp|Q9M1W7.2|SKI30_ARATH(RecName: Full=F-box/kelch-repeat protein SKIP30; AltName: Full=SKP1-interacting partner 30)
miR156a-5p	TRINITY_DN89603_c1_g2	2	1	20	2483	2502	TGACAGAAGAGAGTGAGCAC	*|||||||||:||:||||*|	TCTGTCTTCTTTCGCTCGAG					K04567	KARS, lysS	map00970(Aminoacyl-tRNA biosynthesis)	PF00152.17(tRNA-synt_2:tRNA synthetases class II (D, K and N)); PF01409.17(tRNA-synt_2d:tRNA synthetases class II core domain (F))	GO:0003676(molecular_function:nucleic acid binding); GO:0004824(molecular_function:lysine-tRNA ligase activity); GO:0005524(molecular_function:ATP binding); GO:0006430(biological_process:lysyl-tRNA aminoacylation); GO:0005737(cellular_component:cytoplasm)	gi|731323066|ref|XP_010672231.1|( PREDICTED: lysine--tRNA ligase-like [Beta vulgaris subsp. vulgaris])	gi|55583785|sp|Q6F2U9.1|SYK_ORYSJ(RecName: Full=Lysine--tRNA ligase; AltName: Full=Lysyl-tRNA synthetase; Short=LysRS)
miR396a-3p	TRINITY_DN70579_c0_g2	2	1	21	420	440	GTTCAATAAAGCTGTGGGAAG	||||||||||||*||||*||*	CAAGTTATTTCGTCACCGTTG	COG5264(O:Posttranslational modification, protein turnover, chaperones )		COG5264(Vacuolar transporter chaperone)					PF02656.12(DUF202:Domain of unknown function (DUF202))		gi|159465309|ref|XP_001690865.1|( vacuolar transport chaperone-like protein [Chlamydomonas reinhardtii])	gi|51704292|sp|P47075.2|VTC4_YEAST(RecName: Full=Vacuolar transporter chaperone 4; AltName: Full=Phosphate metabolism protein 3)
miR395h	TRINITY_DN85638_c0_g1	2.2	1	21	249	268	ATGAAGTGTTTGGGGGAACTT	|||||||||||||*|:||*|:	TACTTCACAAACCGCTTT-AG		NOG33221(O:Posttranslational modification, protein turnover, chaperones )		NOG33221(Breast cancer 1, early onset)				PF13041.3(PPR_2:PPR repeat family); PF01535.17(PPR:PPR repeat); PF14432.3(DYW_deaminase:DYW family of nucleic acid deaminases); PF12854.4(PPR_1:PPR repeat); PF13812.3(PPR_3:Pentatricopeptide repeat domain); PF17177.1(PPR_long:Pentacotripeptide-repeat region of PROPR)	GO:0008270(molecular_function:zinc ion binding)	gi|731310856|ref|XP_010679059.1|( PREDICTED: pentatricopeptide repeat-containing protein At4g21065 [Beta vulgaris subsp. vulgaris])	gi|223635630|sp|A8MQA3.2|PP330_ARATH(RecName: Full=Pentatricopeptide repeat-containing protein At4g21065)
miR165a-3p	TRINITY_DN91558_c0_g3	2.2	1	21	1237	1257	TCGGACCAGGCTTCATCCCCC	:|||||||||||||||*||**	GGCCTGGTCCGAAGTAAGGTC		NOG02762(K:Transcription )		NOG02762(Homeobox-leucine zipper protein)	K09338	HD-ZIP		PF01852.16(START:START domain); PF00046.26(Homeobox:Homeobox domain); PF08670.8(MEKHLA:MEKHLA domain)	GO:0005634(cellular_component:nucleus); GO:0003677(molecular_function:DNA binding); GO:0008289(molecular_function:lipid binding)	gi|731359700|ref|XP_010691422.1|( PREDICTED: homeobox-leucine zipper protein ATHB-15-like isoform X1 [Beta vulgaris subsp. vulgaris])	gi|75216693|sp|Q9ZU11.1|ATB15_ARATH(RecName: Full=Homeobox-leucine zipper protein ATHB-15; AltName: Full=HD-ZIP protein ATHB-15; AltName: Full=Homeodomain transcription factor ATHB-15; AltName: Full=Protein CORONA; AltName: Full=Protein INCURVATA 4)
miR165a-3p	TRINITY_DN91558_c0_g5	2.2	1	21	1440	1460	TCGGACCAGGCTTCATCCCCC	:|||||||||||||||*||**	GGCCTGGTCCGAAGTAAGGTC					K09338	HD-ZIP		PF00046.26(Homeobox:Homeobox domain); PF01852.16(START:START domain); PF00170.18(bZIP_1:bZIP transcription factor)	GO:0005634(cellular_component:nucleus); GO:0003677(molecular_function:DNA binding); GO:0008289(molecular_function:lipid binding)	gi|902170490|gb|KNA07846.1|( hypothetical protein SOVF_168070 [Spinacia oleracea])	gi|75220729|sp|Q39123.1|ATHB8_ARATH(RecName: Full=Homeobox-leucine zipper protein ATHB-8; AltName: Full=HD-ZIP protein ATHB-8; AltName: Full=Homeodomain transcription factor ATHB-8)
miR165a-3p	TRINITY_DN91558_c0_g8	2.2	1	21	713	733	TCGGACCAGGCTTCATCCCCC	:|||||||||||||||*||**	GGCCTGGTCCGAAGTAAGGTC					K09338	HD-ZIP		PF01852.16(START:START domain); PF00046.26(Homeobox:Homeobox domain)	GO:0005634(cellular_component:nucleus); GO:0003677(molecular_function:DNA binding); GO:0008289(molecular_function:lipid binding)	gi|731317331|ref|XP_010668539.1|( PREDICTED: homeobox-leucine zipper protein ATHB-8-like [Beta vulgaris subsp. vulgaris])	gi|75220729|sp|Q39123.1|ATHB8_ARATH(RecName: Full=Homeobox-leucine zipper protein ATHB-8; AltName: Full=HD-ZIP protein ATHB-8; AltName: Full=Homeodomain transcription factor ATHB-8)
miR164b	TRINITY_DN92256_c1_g4	2.2	1	21	3114	3134	TGGAGAAGCAGGGCACGTGCA	|||||||||||:|||*||:*|	ACCTCTTCGTCTCGTACATCT					K00963	UGP2, galU, galF	map00520(Amino sugar and nucleotide sugar metabolism); map00040(Pentose and glucuronate interconversions); map00500(Starch and sucrose metabolism); map00052(Galactose metabolism)	PF01704.15(UDPGP:UTP--glucose-1-phosphate uridylyltransferase)	GO:0003983(molecular_function:UTP:glucose-1-phosphate uridylyltransferase activity); GO:0006011(biological_process:UDP-glucose metabolic process)	gi|965665814|dbj|BAT81302.1|( hypothetical protein VIGAN_03098900 [Vigna angularis var. angularis])	gi|136739|sp|P19595.3|UGPA_SOLTU(RecName: Full=UTP--glucose-1-phosphate uridylyltransferase; AltName: Full=UDP-glucose pyrophosphorylase; Short=UDPGP; Short=UGPase)
miR156l-5p	TRINITY_DN84801_c0_g1	2.2	1	21	1790	1810	CGACAGAAGAGAGTGAGCATA	*||||||||||||*|||||:*	ACTGTCTTCTCTCTCTCGTGC								PF03110.11(SBP:SBP domain)		gi|731343152|ref|XP_010682751.1|( PREDICTED: squamosa promoter-binding-like protein 2 [Beta vulgaris subsp. vulgaris])	gi|75112353|sp|Q5Z818.1|SPL12_ORYSJ(RecName: Full=Squamosa promoter-binding-like protein 12)
miR156l-5p	TRINITY_DN84801_c0_g2	2.2	1	21	2299	2319	CGACAGAAGAGAGTGAGCATA	*||||||||||||*|||||:*	ACTGTCTTCTCTCTCTCGTGG								PF03110.11(SBP:SBP domain)		gi|731343152|ref|XP_010682751.1|( PREDICTED: squamosa promoter-binding-like protein 2 [Beta vulgaris subsp. vulgaris])	gi|67461550|sp|Q9S840.1|SPL2_ARATH(RecName: Full=Squamosa promoter-binding-like protein 2)
miR156l-5p	TRINITY_DN90097_c1_g1	2.2	1	21	585	606	CGACAGAAGAGAGTGAGC-ATA	||||||*|||||||||||**:|	GCTGTCGTCTCTCACTCGGCGT	COG0199(J:Translation, ribosomal structure and biogenesis )		COG0199(Binds 16S rRNA, required for the assembly of 30S particles and may also be responsible for determining the conformation of the 16S rRNA at the A site (By similarity))		K02954	RP-S14, MRPS14, rpsN	map03010(Ribosome)	PF00253.18(Ribosomal_S14:Ribosomal protein S14p/S29e)	GO:0005840(cellular_component:ribosome); GO:0003735(molecular_function:structural constituent of ribosome); GO:0006412(biological_process:translation); GO:0005739(cellular_component:mitochondrion)	gi|927682216|gb|ALE29228.1|( ribosomal protein S14 (mitochondrion) [Heuchera parviflora var. saurensis])	gi|134066|sp|P14875.2|RT14_OENBE(RecName: Full=Ribosomal protein S14, mitochondrial (mitochondrion) [Oenothera berteroana])
miR169d	TRINITY_DN107545_c0_g1	2.2	1	21	183	204	TAGCCAAGGATGAATTGCCG-G	*||||||||||||*|||||:*|	TTCGGTTCCTACTAAACGGTAC					K08064	NFYA				gi|108706462|gb|ABF94257.1|( CCAAT-binding transcription factor subunit B family protein, expressed [Oryza sativa Japonica Group])	_
miR169d	TRINITY_DN88826_c1_g5	2.2	1	21	1669	1689	TAGCCAAGGATGAATTGCCGG	||||||||||*||||||*|:*	ATCGGTTCCTTCTTAACAGTA								PF03106.12(WRKY:WRKY DNA -binding domain)		gi|731322479|ref|XP_010671912.1|( PREDICTED: probable WRKY transcription factor 53 [Beta vulgaris subsp. vulgaris])	gi|29839683|sp|Q9SUP6.1|WRK53_ARATH(RecName: Full=Probable WRKY transcription factor 53; AltName: Full=WRKY DNA-binding protein 53)
miR319a	TRINITY_DN89893_c1_g2	2.2	1	21	1389	1409	TTGGACTGAAGGGAGCTCCCT	:||||||||||||*:||||*|	GACCTGACTTCCCATGAGGAA								PF03634.10(TCP:TCP family transcription factor)		gi|731356574|ref|XP_010689747.1|( PREDICTED: transcription factor TCP4-like [Beta vulgaris subsp. vulgaris])	gi|75157409|sp|Q8LPR5.1|TCP4_ARATH(RecName: Full=Transcription factor TCP4; AltName: Full=Protein MATERNAL EFFECT EMBRYO ARREST 35)
miR160g	TRINITY_DN86715_c5_g3	2.2	1	21	195	215	TGCCTGGCTCCTTGTATGCCA	:||||||||*|:||||||||*	GCGGACCGAAGGACATACGGA										gi|731363367|ref|XP_010693396.1|( PREDICTED: auxin response factor 18-like isoform X2 [Beta vulgaris subsp. vulgaris])	gi|75253259|sp|Q653H7.1|ARFR_ORYSJ(RecName: Full=Auxin response factor 18; AltName: Full=OsARF10)
miR171c-5p	TRINITY_DN86613_c0_g1	2.2	1	21	3684	3705	GGATATTGGTGCGGTTCA-ATC	:||||||:||||::||||*|||	TCTATAATCACGTTAAGTATAG								PF13020.3(DUF3883:Domain of unknown function (DUF3883))		gi|902228151|gb|KNA20998.1|( hypothetical protein SOVF_047330 isoform A [Spinacia oleracea])	gi|122066060|sp|Q9NZJ4.2|SACS_HUMAN(RecName: Full=Sacsin; AltName: Full=DnaJ homolog subfamily C member 29; Short=DNAJC29)
miR396g-5p	TRINITY_DN73862_c0_g2	2.2	1	21	32	52	TTCCACGGCTTTCTTGAACTT	||||||||||||**||||||:	AAGGTGCCGAAACCACTTGAG					K17080	PHB1			GO:0016020(cellular_component:membrane)	gi|720030276|ref|XP_010265468.1|( PREDICTED: prohibitin-3, mitochondrial-like [Nelumbo nucifera])	gi|1730544|sp|P40961.2|PHB1_YEAST(RecName: Full=Prohibitin-1)
miR396g-5p	TRINITY_DN88816_c1_g1	2.2	1	21	528	548	TTCCACGGCTTTCTTGAACTT	:||||||*|:||||||||*||	GAGGTGCAGGAAGAACTTTAA					K20093	ERCC6L, PICH		PF00271.28(Helicase_C:Helicase conserved C-terminal domain)	GO:0005524(molecular_function:ATP binding)	gi|731327255|ref|XP_010674428.1|( PREDICTED: protein CHROMATIN REMODELING 24 [Beta vulgaris subsp. vulgaris])	gi|75331245|sp|Q8W103.1|CHR24_ARATH(RecName: Full=Protein CHROMATIN REMODELING 24; Short=AtCHR24; AltName: Full=DNA excision repair protein CHR24)
miR166e-5p	TRINITY_DN68795_c0_g1	2.2	1	21	167	188	GGAATGTTGGCTGGCTCGAG-G	|||||||||||||:*||:||*|	CCTTACAACCGACTAAGTTCAC					K14514	EIN3	map04016(MAPK signaling pathway - plant); map04075(Plant hormone signal transduction)			gi|55975504|gb|AAV68142.1|( ethylene insensitive 3-like 4 [Dianthus caryophyllus])	gi|37078133|sp|O24606.1|EIN3_ARATH(RecName: Full=Protein ETHYLENE INSENSITIVE 3)
miR398a-3p	TRINITY_DN87262_c5_g4	2.2	1	21	1124	1144	TGTGTTCTCAGGTCACCCCTT	|||*||||||:|||||||*:|	ACAAAAGAGTTCAGTGGGCGA										gi|731345613|ref|XP_010684010.1|( PREDICTED: uncharacterized protein LOC104898613 [Beta vulgaris subsp. vulgaris])	_
miR398a-3p	TRINITY_DN88485_c0_g11	2.2	1	21	66	86	TGTGTTCTCAGGTCACCCCTT	|||:|||||*|||||||*|:|	ACATAAGAGCCCAGTGGTGGA	COG2097(J:Translation, ribosomal structure and biogenesis )		COG2097((ribosomal) protein)		K02910	RP-L31e, RPL31	map03010(Ribosome)	PF01198.16(Ribosomal_L31e:Ribosomal protein L31e)	GO:0003735(molecular_function:structural constituent of ribosome); GO:0002181(biological_process:cytoplasmic translation); GO:0022625(cellular_component:cytosolic large ribosomal subunit)	gi|302800443|ref|XP_002981979.1|( hypothetical protein SELMODRAFT_268515 [Selaginella moellendorffii])	gi|51702802|sp|P62901.1|RL31_PIG(RecName: Full=60S ribosomal protein L31 >gi|51702803|sp|P62902.1|RL31_RAT RecName: Full=60S ribosomal protein L31 >gi|51702807|sp|P62899.1|RL31_HUMAN RecName: Full=60S ribosomal protein L31 >gi|51702808|sp|P62900.1|RL31_MOUSE RecName: Full=60S ribosomal protein L31 >gi|75052079|sp|Q56JX3.1|RL31_BOVIN RecName: Full=60S ribosomal protein L31 >gi|119366012|sp|Q1KSC7.…
miR395a	TRINITY_DN140718_c0_g1	2.2	1	21	149	168	GTGAAGTGCTTGGGGGAACTC	||||||*||||||||:|*|:|	CACTTCTCGAACCCCTT-GGG								PF00078.24(RVT_1:Reverse transcriptase (RNA-dependent DNA polymerase))		gi|571504561|ref|XP_006595311.1|( PREDICTED: uncharacterized protein LOC102668530 [Glycine max])	_
miR395a	TRINITY_DN90363_c0_g1	2.2	1	21	3145	3164	GTGAAGTGCTTGGGGGAACTC	:*||||||||||||:||*|||	TCCTTCACGAACCCTCT-GAG	COG5186(A:RNA processing and modification )		COG5186(polyA polymerase)		K14376	PAP	map03015(mRNA surveillance pathway)	PF04928.14(PAP_central:Poly(A) polymerase central domain); PF04926.12(PAP_RNA-bind:Poly(A) polymerase predicted RNA binding domain); PF01909.20(NTP_transf_2:Nucleotidyltransferase domain); PF12131.5(DUF3586:Protein of unknown function (DUF3586))	GO:0048827(biological_process:phyllome development); GO:0048519(biological_process:negative regulation of biological process); GO:0003723(molecular_function:RNA binding); GO:0006378(biological_process:mRNA polyadenylation); GO:0009908(biological_process:flower development); GO:0004652(molecular_function:polynucleotide adenylyltransferase activity); GO:0005634(cellular_component:nucleus)	gi|902237178|gb|KNA24682.1|( hypothetical protein SOVF_013410 [Spinacia oleracea])	gi|75264043|sp|Q9LMT2.1|PAPS1_ARATH(RecName: Full=Nuclear poly(A) polymerase 1; Short=PAP(I); Short=Poly(A) polymerase I; AltName: Full=Polynucleotide adenylyltransferase 1)
miR395a	TRINITY_DN90363_c0_g2	2.2	1	21	2635	2654	GTGAAGTGCTTGGGGGAACTC	:*||||||||||||:||*|||	TTCTTCACGAACCCTCT-GAG	COG5186(A:RNA processing and modification )		COG5186(polyA polymerase)		K14376	PAP	map03015(mRNA surveillance pathway)	PF04928.14(PAP_central:Poly(A) polymerase central domain); PF04926.12(PAP_RNA-bind:Poly(A) polymerase predicted RNA binding domain)	GO:0043631(biological_process:RNA polyadenylation); GO:0031123(biological_process:RNA 3'-end processing); GO:0003723(molecular_function:RNA binding); GO:0004652(molecular_function:polynucleotide adenylyltransferase activity); GO:0005634(cellular_component:nucleus)	gi|731324606|ref|XP_010673060.1|( PREDICTED: nuclear poly(A) polymerase 1 [Beta vulgaris subsp. vulgaris])	gi|75264043|sp|Q9LMT2.1|PAPS1_ARATH(RecName: Full=Nuclear poly(A) polymerase 1; Short=PAP(I); Short=Poly(A) polymerase I; AltName: Full=Polynucleotide adenylyltransferase 1)
miR395a	TRINITY_DN92264_c2_g2	2.2	1	21	1089	1109	GTGAAGTGCTTGGGGGAACTC	:*|||||||:||||:||||||	TTCTTCACGGACCCTCTTGAG	COG0149(G:Carbohydrate transport and metabolism )		COG0149(triosephosphate isomerase)		K01803	TPI, tpiA	map00010(Glycolysis / Gluconeogenesis); map00051(Fructose and mannose metabolism); map00710(Carbon fixation in photosynthetic organisms); map00562(Inositol phosphate metabolism)	PF00121.15(TIM:Triosephosphate isomerase)	GO:0019693(biological_process:ribose phosphate metabolic process); GO:0016853(molecular_function:isomerase activity); GO:0044723(biological_process:single-organism carbohydrate metabolic process); GO:0046496(biological_process:nicotinamide nucleotide metabolic process)	gi|326502178|dbj|BAK06780.1|( predicted protein [Hordeum vulgare subsp. vulgare])	gi|353526354|sp|P17751.4|TPIS_MOUSE(RecName: Full=Triosephosphate isomerase; Short=TIM; AltName: Full=Triose-phosphate isomerase)
miR397b	TRINITY_DN83131_c0_g1	2.2	1	21	615	634	CCATTGAGTGCAGCGTTGATG	||||||||||||:*|||*|:|	GGTAACTCACGTTCCAA-TGC					K10403	KIF22		PF00225.20(Kinesin:Kinesin motor domain); PF12836.4(HHH_3:Helix-hairpin-helix motif); PF16796.2(Microtub_bd:Microtubule binding)	GO:0005488(molecular_function:binding)	gi|731322374|ref|XP_010671854.1|( PREDICTED: kinesin-like protein KIF22 isoform X2 [Beta vulgaris subsp. vulgaris])	gi|81889019|sp|Q5I0E8.1|KIF22_RAT(RecName: Full=Kinesin-like protein KIF22)
miR1863b	TRINITY_DN92158_c2_g2	2.2	1	24	454	477	AGCTCTGATACCATGTTAACTGTT	*||||||||||||||||**||:|*	CCGAGACTATGGTACAACAGATAC										gi|870852227|gb|KMT04171.1|( hypothetical protein BVRB_8g186190 [Beta vulgaris subsp. vulgaris])	gi|130582|sp|P10978.1|POLX_TOBAC(RecName: Full=Retrovirus-related Pol polyprotein from transposon TNT 1-94; Includes: RecName: Full=Protease; Includes: RecName: Full=Reverse transcriptase; Includes: RecName: Full=Endonuclease)
miR395k	TRINITY_DN85638_c0_g1	2.2	1	21	249	268	GTGAAGTGTTTGGGGGAACTC	:||||||||||||*|:||*||	TACTTCACAAACCGCTTT-AG		NOG33221(O:Posttranslational modification, protein turnover, chaperones )		NOG33221(Breast cancer 1, early onset)				PF13041.3(PPR_2:PPR repeat family); PF01535.17(PPR:PPR repeat); PF14432.3(DYW_deaminase:DYW family of nucleic acid deaminases); PF12854.4(PPR_1:PPR repeat); PF13812.3(PPR_3:Pentatricopeptide repeat domain); PF17177.1(PPR_long:Pentacotripeptide-repeat region of PROPR)	GO:0008270(molecular_function:zinc ion binding)	gi|731310856|ref|XP_010679059.1|( PREDICTED: pentatricopeptide repeat-containing protein At4g21065 [Beta vulgaris subsp. vulgaris])	gi|223635630|sp|A8MQA3.2|PP330_ARATH(RecName: Full=Pentatricopeptide repeat-containing protein At4g21065)
miR395k	TRINITY_DN92216_c2_g7	2.2	1	21	83	103	GTGAAGTGTTTGGGGGAACTC	:||||:|:||||||||||*|*	TACTTTATAAACCCCCTTTAC		NOG01243(R:General function prediction only )		NOG01243(Ankyrin repeat and ibr domain containing)	K11968	ARIH1		PF01485.18(IBR:IBR domain, a half RING-finger domain); PF13923.3(zf-C3HC4_2:Zinc finger, C3HC4 type (RING finger)); PF13445.3(zf-RING_UBOX:RING-type zinc-finger); PF00097.22(zf-C3HC4:Zinc finger, C3HC4 type (RING finger)); PF13639.3(zf-RING_2:Ring finger domain); PF14634.3(zf-RING_5:zinc-RING finger domain)	GO:0016567(biological_process:protein ubiquitination); GO:0008270(molecular_function:zinc ion binding); GO:0004842(molecular_function:ubiquitin-protein transferase activity)	gi|731326159|ref|XP_010673879.1|( PREDICTED: probable E3 ubiquitin-protein ligase ARI8 isoform X1 [Beta vulgaris subsp. vulgaris])	gi|75328048|sp|Q84RR0.1|ARI7_ARATH(RecName: Full=Probable E3 ubiquitin-protein ligase ARI7; AltName: Full=ARIADNE-like protein ARI7; AltName: Full=Protein ariadne homolog 7)
miR395k	TRINITY_DN93074_c2_g1	2.2	1	21	969	989	GTGAAGTGTTTGGGGGAACTC	:||||||||||||||:|**|*	TACTTCACAAACCCCTTAAAT								PF02453.14(Reticulon:Reticulon)	GO:0005783(cellular_component:endoplasmic reticulum); GO:0044425(cellular_component:membrane part)	gi|731311481|ref|XP_010669728.1|( PREDICTED: reticulon-like protein B4 [Beta vulgaris subsp. vulgaris])	gi|75209124|sp|Q9SUR3.1|RTNLA_ARATH(RecName: Full=Reticulon-like protein B1; Short=AtRTNLB1; AltName: Full=VirB2-interacting protein 1)
miR166e-3p	TRINITY_DN91558_c0_g3	2.2	1	21	1237	1257	TCGAACCAGGCTTCATTCCCC	:||*|||||||||||||||**	GGCCTGGTCCGAAGTAAGGTC		NOG02762(K:Transcription )		NOG02762(Homeobox-leucine zipper protein)	K09338	HD-ZIP		PF01852.16(START:START domain); PF00046.26(Homeobox:Homeobox domain); PF08670.8(MEKHLA:MEKHLA domain)	GO:0005634(cellular_component:nucleus); GO:0003677(molecular_function:DNA binding); GO:0008289(molecular_function:lipid binding)	gi|731359700|ref|XP_010691422.1|( PREDICTED: homeobox-leucine zipper protein ATHB-15-like isoform X1 [Beta vulgaris subsp. vulgaris])	gi|75216693|sp|Q9ZU11.1|ATB15_ARATH(RecName: Full=Homeobox-leucine zipper protein ATHB-15; AltName: Full=HD-ZIP protein ATHB-15; AltName: Full=Homeodomain transcription factor ATHB-15; AltName: Full=Protein CORONA; AltName: Full=Protein INCURVATA 4)
miR166e-3p	TRINITY_DN91558_c0_g5	2.2	1	21	1440	1460	TCGAACCAGGCTTCATTCCCC	:||*|||||||||||||||**	GGCCTGGTCCGAAGTAAGGTC					K09338	HD-ZIP		PF00046.26(Homeobox:Homeobox domain); PF01852.16(START:START domain); PF00170.18(bZIP_1:bZIP transcription factor)	GO:0005634(cellular_component:nucleus); GO:0003677(molecular_function:DNA binding); GO:0008289(molecular_function:lipid binding)	gi|902170490|gb|KNA07846.1|( hypothetical protein SOVF_168070 [Spinacia oleracea])	gi|75220729|sp|Q39123.1|ATHB8_ARATH(RecName: Full=Homeobox-leucine zipper protein ATHB-8; AltName: Full=HD-ZIP protein ATHB-8; AltName: Full=Homeodomain transcription factor ATHB-8)
miR166e-3p	TRINITY_DN91558_c0_g8	2.2	1	21	713	733	TCGAACCAGGCTTCATTCCCC	:||*|||||||||||||||**	GGCCTGGTCCGAAGTAAGGTC					K09338	HD-ZIP		PF01852.16(START:START domain); PF00046.26(Homeobox:Homeobox domain)	GO:0005634(cellular_component:nucleus); GO:0003677(molecular_function:DNA binding); GO:0008289(molecular_function:lipid binding)	gi|731317331|ref|XP_010668539.1|( PREDICTED: homeobox-leucine zipper protein ATHB-8-like [Beta vulgaris subsp. vulgaris])	gi|75220729|sp|Q39123.1|ATHB8_ARATH(RecName: Full=Homeobox-leucine zipper protein ATHB-8; AltName: Full=HD-ZIP protein ATHB-8; AltName: Full=Homeodomain transcription factor ATHB-8)
miR399e	TRINITY_DN86243_c0_g4	2.2	1	21	2352	2372	CGCCAAAGGAGAGTTGCCCTC	*||*||||||||||||||*:|	TCGCTTTCCTCTCAACGGCGG	COG1100(R:General function prediction only )		COG1100(GTP-binding Protein)		K07904	RAB11A	map04144(Endocytosis)	PF00071.19(Ras:Ras family); PF08477.10(Roc:Ras of Complex, Roc, domain of DAPkinase)	GO:0005525(molecular_function:GTP binding); GO:0005622(cellular_component:intracellular); GO:0016787(molecular_function:hydrolase activity); GO:0007264(biological_process:small GTPase mediated signal transduction)	gi|566200975|ref|XP_006376403.1|( GTP-binding family protein [Populus trichocarpa])	gi|75171043|sp|Q9FJH0.1|RAA1F_ARATH(RecName: Full=Ras-related protein RABA1f; Short=AtRABA1f)
miR156a	TRINITY_DN82303_c0_g1	2.2	1	21	1243	1262	TGACAGAAGAGAGAGAGCACA	::||||||||||||:||*|*|	GTTGTCTTCTCTCTTTC-TAT								PF11204.5(DUF2985:Protein of unknown function (DUF2985)); PF04749.14(PLAC8:PLAC8 family)	GO:0016020(cellular_component:membrane)	gi|731344737|ref|XP_010683576.1|( PREDICTED: uncharacterized protein LOC104898227 [Beta vulgaris subsp. vulgaris])	_
miR156a	TRINITY_DN85866_c0_g2	2.2	1	21	703	722	TGACAGAAGAGAGAGAGCACA	:|||||||||||:||*|*|||	GCTGTCTTCTCTTTCAC-TGT		NOG21819(L:Replication, recombination and repair )		NOG21819(TAR DNA binding protein)	K14411	MSI	map03015(mRNA surveillance pathway)	PF00076.19(RRM_1:RNA recognition motif. (a.k.a. RRM, RBD, or RNP domain)); PF16367.2(RRM_7:RNA recognition motif); PF14605.3(Nup35_RRM_2:Nup53/35/40-type RNA recognition motif)	GO:0003676(molecular_function:nucleic acid binding); GO:0000166(molecular_function:nucleotide binding)	gi|731373300|ref|XP_010666608.1|( PREDICTED: putative heterogeneous nuclear ribonucleoprotein A1-like 3 [Beta vulgaris subsp. vulgaris])	gi|75270351|sp|Q8W034.1|RNP1_ARATH(RecName: Full=Heterogeneous nuclear ribonucleoprotein 1; Short=hnRNP1)
miR5077	TRINITY_DN68141_c0_g1	2.2	1	19	685	703	GTTCGCGTCGGGTTCACCA	:|:|||||||||||||*|*	TAGGCGCAGCCCAAGTCGA								PF00643.21(zf-B_box:B-box zinc finger); PF16366.2(CEBP_ZZ:Cytoplasmic polyadenylation element-binding protein ZZ domain)	GO:0008270(molecular_function:zinc ion binding); GO:0000989(molecular_function:transcription factor activity, transcription factor binding); GO:0009640(biological_process:photomorphogenesis); GO:0006355(biological_process:regulation of transcription, DNA-templated); GO:0003677(molecular_function:DNA binding); GO:0005634(cellular_component:nucleus)	gi|1002264225|ref|XP_015636444.1|( PREDICTED: B-box zinc finger protein 24 [Oryza sativa Japonica Group])	gi|17433180|sp|Q96288.1|BBX24_ARATH(RecName: Full=B-box zinc finger protein 24; AltName: Full=Salt tolerance protein)
miR172h-5p	TRINITY_DN92662_c1_g1	2.2	1	21	202	222	GGAGCACCATCAAGATTCACA	::|:|||||||||||||*|*|	TTTTGTGGTAGTTCTAATTCT								PF00704.25(Glyco_hydro_18:Glycosyl hydrolases family 18)	GO:0004568(molecular_function:chitinase activity); GO:0006032(biological_process:chitin catabolic process); GO:0008061(molecular_function:chitin binding); GO:0005576(cellular_component:extracellular region); GO:0016020(cellular_component:membrane)	gi|731349183|ref|XP_010685866.1|( PREDICTED: chitinase 2-like [Beta vulgaris subsp. vulgaris])	gi|47605407|sp|Q7M443.1|CHIT2_TULBA(RecName: Full=Chitinase 2; AltName: Full=Tulip bulb chitinase-2; Short=TBC-2)
miR167h-5p	TRINITY_DN116389_c0_g1	2.2	1	21	37	57	TGAAGCTGCCAACATGATCTG	*|||:|||||||||||*||:|	CCTTTGACGGTTGTACCAGGC		NOG71591(S:Function unknown )		NOG71591(Tubulin folding cofactor A)	K17292	TBCA		PF02970.13(TBCA:Tubulin binding cofactor A)		gi|703103236|ref|XP_010097677.1|( Tubulin-specific chaperone A [Morus notabilis])	gi|147744592|sp|P80585.2|TBCA_CHICK(RecName: Full=Tubulin-specific chaperone A; AltName: Full=TCP1-chaperonin cofactor A; AltName: Full=Tubulin-folding cofactor A; Short=CFA)
miR169d-5p	TRINITY_DN85133_c0_g1	2.2	1	21	1869	1889	AAGCCAAGGATGACTTGCCGG	*|||||||||||||||*||:*	CTCGGTTCCTACTGAAGGGTA					K08064	NFYA		PF02045.12(CBFB_NFYA:CCAAT-binding transcription factor (CBF-B/NF-YA) subunit B)		gi|731348126|ref|XP_010685336.1|( PREDICTED: nuclear transcription factor Y subunit A-3 [Beta vulgaris subsp. vulgaris])	gi|75213441|sp|Q9SYH4.1|NFYA5_ARATH(RecName: Full=Nuclear transcription factor Y subunit A-5; Short=AtNF-YA-5)
miR159b-5p	TRINITY_DN93738_c0_g1	2.2	1	21	337	356	GAGCTCCTTGAAGTTCAATGG	|*||||||||||||:||*||:	CACGAGGAACTTCAGGT-ACT					K06185	ABCF2		PF13304.3(AAA_21:AAA domain, putative AbiEii toxin, Type IV TA system); PF00005.24(ABC_tran:ABC transporter)	GO:0016887(molecular_function:ATPase activity); GO:0005524(molecular_function:ATP binding); GO:0009536(cellular_component:plastid)	gi|1002291982|ref|XP_015650334.1|( PREDICTED: ABC transporter F family member 1 [Oryza sativa Japonica Group])	gi|75333951|sp|Q9FJH6.1|AB1F_ARATH(RecName: Full=ABC transporter F family member 1; Short=ABC transporter ABCF.1; Short=AtABCF1; AltName: Full=GCN20-type ATP-binding cassette protein GCN1)
miR159c	TRINITY_DN86044_c0_g1	2.2	1	21	42	61	TTTGGATTGAAGGGAGCTCCT	:||||||||||:|||:|*|*|	GAACCTAACTTTCCTTG-GTA								PF13966.3(zf-RVT:zinc-binding in reverse transcriptase)		gi|147815144|emb|CAN67932.1|( hypothetical protein VITISV_013913 [Vitis vinifera])	gi|125987635|sp|P0C2F6.1|RNHX1_ARATH(RecName: Full=Putative ribonuclease H protein At1g65750)
miR166k-3p	TRINITY_DN91558_c0_g3	2.2	1	21	1237	1257	TCGGACCAGGCTTCAATCCCT	:||||||||||||||*|||**	GGCCTGGTCCGAAGTAAGGTC		NOG02762(K:Transcription )		NOG02762(Homeobox-leucine zipper protein)	K09338	HD-ZIP		PF01852.16(START:START domain); PF00046.26(Homeobox:Homeobox domain); PF08670.8(MEKHLA:MEKHLA domain)	GO:0005634(cellular_component:nucleus); GO:0003677(molecular_function:DNA binding); GO:0008289(molecular_function:lipid binding)	gi|731359700|ref|XP_010691422.1|( PREDICTED: homeobox-leucine zipper protein ATHB-15-like isoform X1 [Beta vulgaris subsp. vulgaris])	gi|75216693|sp|Q9ZU11.1|ATB15_ARATH(RecName: Full=Homeobox-leucine zipper protein ATHB-15; AltName: Full=HD-ZIP protein ATHB-15; AltName: Full=Homeodomain transcription factor ATHB-15; AltName: Full=Protein CORONA; AltName: Full=Protein INCURVATA 4)
miR166k-3p	TRINITY_DN91558_c0_g5	2.2	1	21	1440	1460	TCGGACCAGGCTTCAATCCCT	:||||||||||||||*|||**	GGCCTGGTCCGAAGTAAGGTC					K09338	HD-ZIP		PF00046.26(Homeobox:Homeobox domain); PF01852.16(START:START domain); PF00170.18(bZIP_1:bZIP transcription factor)	GO:0005634(cellular_component:nucleus); GO:0003677(molecular_function:DNA binding); GO:0008289(molecular_function:lipid binding)	gi|902170490|gb|KNA07846.1|( hypothetical protein SOVF_168070 [Spinacia oleracea])	gi|75220729|sp|Q39123.1|ATHB8_ARATH(RecName: Full=Homeobox-leucine zipper protein ATHB-8; AltName: Full=HD-ZIP protein ATHB-8; AltName: Full=Homeodomain transcription factor ATHB-8)
miR166k-3p	TRINITY_DN91558_c0_g8	2.2	1	21	713	733	TCGGACCAGGCTTCAATCCCT	:||||||||||||||*|||**	GGCCTGGTCCGAAGTAAGGTC					K09338	HD-ZIP		PF01852.16(START:START domain); PF00046.26(Homeobox:Homeobox domain)	GO:0005634(cellular_component:nucleus); GO:0003677(molecular_function:DNA binding); GO:0008289(molecular_function:lipid binding)	gi|731317331|ref|XP_010668539.1|( PREDICTED: homeobox-leucine zipper protein ATHB-8-like [Beta vulgaris subsp. vulgaris])	gi|75220729|sp|Q39123.1|ATHB8_ARATH(RecName: Full=Homeobox-leucine zipper protein ATHB-8; AltName: Full=HD-ZIP protein ATHB-8; AltName: Full=Homeodomain transcription factor ATHB-8)
miR156a-3p	TRINITY_DN85853_c0_g1	2.2	1	22	592	612	GCTCACTGCTCTTTCTGTCAGA	||||||||||||*|||*:||||	CGAGTGACGAGATAGA-GGTCT	COG0292(J:Translation, ribosomal structure and biogenesis )		COG0292(Binds directly to 23S ribosomal RNA and is necessary for the in vitro assembly process of the 50S ribosomal subunit. It is not involved in the protein synthesizing functions of that subunit (By similarity))		K02887	RP-L20, MRPL20, rplT	map03010(Ribosome)	PF00453.15(Ribosomal_L20:Ribosomal protein L20)	GO:0006412(biological_process:translation); GO:0000027(biological_process:ribosomal large subunit assembly); GO:0019843(molecular_function:rRNA binding); GO:0005761(cellular_component:mitochondrial ribosome); GO:0003735(molecular_function:structural constituent of ribosome)	gi|460374743|ref|XP_004233169.1|( PREDICTED: 50S ribosomal protein L20, chloroplastic [Solanum lycopersicum])	gi|254800323|sp|B2KB85.1|RL20_ELUMP(RecName: Full=50S ribosomal protein L20)
miR394a-5p	TRINITY_DN79616_c0_g2	2.2	1	20	263	282	TTGGCATTCTGTCCACCTCC	:||:||||||*||||||||*	GACTGTAAGAGAGGTGGAGC										gi|902217596|gb|KNA17785.1|( hypothetical protein SOVF_076820 [Spinacia oleracea])	_
miR394a-5p	TRINITY_DN86900_c0_g1	2.2	1	20	32	51	TTGGCATTCTGTCCACCTCC	:||||||:|||:||||*|||	GACCGTAGGACGGGTGCAGG					K02925	RP-L3e, RPL3	map03010(Ribosome)	PF00297.19(Ribosomal_L3:Ribosomal protein L3)	GO:0003735(molecular_function:structural constituent of ribosome); GO:0022625(cellular_component:cytosolic large ribosomal subunit); GO:0006412(biological_process:translation); GO:0000027(biological_process:ribosomal large subunit assembly)	gi|168060915|ref|XP_001782438.1|( predicted protein [Physcomitrella patens])	gi|83305621|sp|Q8NKF4.2|RL3_ASPFU(RecName: Full=60S ribosomal protein L3; AltName: Allergen=Asp f 23)
miR8175	TRINITY_DN88041_c5_g1	2.2	1	20	1613	1632	GATCCCCGGCAACGGCGCCA	:|||||||:|||||:||*|*	TTAGGGGCTGTTGCTGCTGG	COG0624(E:Amino acid transport and metabolism )		COG0624(Catalyzes the hydrolysis of N-succinyl-L,L- diaminopimelic acid (SDAP), forming succinate and LL-2,6- diaminoheptanedioate (DAP), an intermediate involved in the bacterial biosynthesis of lysine and meso-diaminopimelic acid, an essential component of bacterial cell walls (By similarity))		K14677	ACY1	map00220(Arginine biosynthesis)	PF01546.25(Peptidase_M20:Peptidase family M20/M25/M40); PF04389.14(Peptidase_M28:Peptidase family M28); PF07687.11(M20_dimer:Peptidase dimerisation domain)	GO:0005737(cellular_component:cytoplasm); GO:0046872(molecular_function:metal ion binding); GO:0004046(molecular_function:aminoacylase activity); GO:0006520(biological_process:cellular amino acid metabolic process); GO:0006508(biological_process:proteolysis); GO:0008237(molecular_function:metallopeptidase activity)	gi|731364571|ref|XP_010694046.1|( PREDICTED: aminoacylase-1-like [Beta vulgaris subsp. vulgaris])	gi|81880060|sp|Q99JW2.1|ACY1_MOUSE(RecName: Full=Aminoacylase-1; Short=ACY-1; AltName: Full=N-acyl-L-amino-acid amidohydrolase)
miR156e	TRINITY_DN85991_c0_g7	2.2	1	21	763	782	TTGACAGAAGATAGAGAGCAC	:|:||||||||||*||||*||	GATTGTCTTCTATGTCTC-TG		NOG07125(A:RNA processing and modification )		NOG07125(cleavage and polyadenylation specificity factor subunit)	K14397	NUDT21, CPSF5, CFIM25	map03015(mRNA surveillance pathway)	PF13869.3(NUDIX_2:Nucleotide hydrolase)		gi|565373503|ref|XP_006353312.1|( PREDICTED: pre-mRNA cleavage factor Im 25 kDa subunit 2 [Solanum tuberosum])	gi|75151275|sp|Q8GXS3.1|CFIS2_ARATH(RecName: Full=Pre-mRNA cleavage factor Im 25 kDa subunit 2)
miR156e	TRINITY_DN88579_c0_g2	2.2	1	21	1723	1743	TTGACAGAAGATAGAGAGCAC	|||||||||:|*|||||:||*	AACTGTCTTTTTTCTCTTGTT								PF13041.3(PPR_2:PPR repeat family); PF12854.4(PPR_1:PPR repeat); PF01535.17(PPR:PPR repeat); PF13812.3(PPR_3:Pentatricopeptide repeat domain); PF17177.1(PPR_long:Pentacotripeptide-repeat region of PROPR); PF10037.6(MRP-S27:Mitochondrial 28S ribosomal protein S27); PF03704.14(BTAD:Bacterial transcriptional activator domain)		gi|731350733|ref|XP_010686656.1|( PREDICTED: pentatricopeptide repeat-containing protein At5g64320, mitochondrial [Beta vulgaris subsp. vulgaris])	gi|75171655|sp|Q9FMF6.1|PP444_ARATH(RecName: Full=Pentatricopeptide repeat-containing protein At5g64320, mitochondrial; Flags: Precursor)
miR399b	TRINITY_DN88302_c0_g1	2.2	1	21	443	463	TGCCAAAGGAGATTTGCCCGG	|||*|||||||||||*|||:|	ACGTTTTCCTCTAAAAGGGTC										gi|731358575|ref|XP_010690824.1|( PREDICTED: WD repeat-containing protein 13 [Beta vulgaris subsp. vulgaris])	_
miR160f-5p	TRINITY_DN94498_c0_g1	2.2	1	21	30	51	TGCCTGGCTCCCTGAATGC-CA	||*|||||:||||||||:|*||	ACTGACCGGGGGACTTATGAGT											gi|586682|sp|P37640.1|YHJB_ECOLI(RecName: Full=Putative HTH-type transcriptional regulator YhjB)
miR399a	TRINITY_DN83619_c0_g2	2.2	1	21	1277	1297	TGCCAAAGGAGAATTGCCCTG	|||||||:||:|||:|||*:|	ACGGTTTTCTTTTAGCGGTGC									GO:0051082(molecular_function:unfolded protein binding); GO:0031072(molecular_function:heat shock protein binding)	gi|902161871|gb|KNA06605.1|( hypothetical protein SOVF_179440 [Spinacia oleracea])	gi|81898706|sp|Q8C3L1.1|SSUH2_MOUSE(RecName: Full=Protein SSUH2 homolog; AltName: Full=Protein ssu-2 homolog)
miR164f	TRINITY_DN87113_c4_g6	2.2	1	21	1046	1065	TGGAGAAGCAGGGCACATGCT	:|:||||:|||||||||::*|	GCTTCTTTGTCCCGTGTGT-A										gi|1173351|sp|P42552.1|S1FA_SPIOL(S1FA_SPIOL RecName: Full=DNA-binding protein S1FA [Spinacia oleracea])	gi|1173351|sp|P42552.1|S1FA_SPIOL(RecName: Full=DNA-binding protein S1FA)
miR393a-5p	TRINITY_DN85416_c0_g1	2.2	1	22	4569	4590	TCCAAAGGGATCGCATTGATCC	:|*||||||||||||||*|||*	GGCTTTCCCTAGCGTAAGTAGA		NOG04192(S:Function unknown )		NOG04192(Involved in proper cytoplasmic distribution of mitochondria (By similarity))	K03255	TIF31, CLU1		PF13236.3(CLU:Clustered mitochondria); PF12807.4(eIF3_p135:Translation initiation factor eIF3 subunit 135); PF13424.3(TPR_12:Tetratricopeptide repeat); PF15044.3(CLU_N:Mitochondrial function, CLU-N-term); PF13374.3(TPR_10:Tetratricopeptide repeat); PF05303.9(DUF727:Protein of unknown function (DUF727))	GO:0003723(molecular_function:RNA binding); GO:0005737(cellular_component:cytoplasm); GO:0048312(biological_process:intracellular distribution of mitochondria)	gi|902141021|gb|KNA04674.1|( hypothetical protein SOVF_197430 [Spinacia oleracea])	gi|408407613|sp|F4J5S1.1|CLU_ARATH(RecName: Full=Clustered mitochondria protein; AltName: Full=Friendly mitochondria protein)
miR393a-5p	TRINITY_DN92433_c2_g1	2.2	1	22	1443	1464	TCCAAAGGGATCGCATTGATCC	||||||||||||:*|||*|:||	AGGTTTCCCTAGTATAAATGGG					K20562	CYP736A		PF00067.19(p450:Cytochrome P450)	GO:0020037(molecular_function:heme binding); GO:0016705(molecular_function:oxidoreductase activity, acting on paired donors, with incorporation or reduction of molecular oxygen); GO:0005506(molecular_function:iron ion binding); GO:0055114(biological_process:oxidation-reduction process)	gi|731356246|ref|XP_010689571.1|( PREDICTED: cytochrome P450 CYP736A12-like [Beta vulgaris subsp. vulgaris])	gi|584863|sp|P37117.1|C71A4_SOLME(RecName: Full=Cytochrome P450 71A4; AltName: Full=CYPLXXIA4; AltName: Full=Cytochrome P-450EG2 [Solanum melongena])
miR169a-3p	TRINITY_DN115477_c0_g1	2.2	1	20	123	141	GGCAAGTTGTCCTTGGCTAC	*|*||||||||||||||:*|	ACCTTCAACAGGAACCGG-G					K01415	ECE		PF05649.10(Peptidase_M13_N:Peptidase family M13)		gi|694452784|ref|XP_009351265.1|( PREDICTED: endothelin-converting enzyme 1-like [Pyrus x bretschneideri])	gi|1706563|sp|P42892.2|ECE1_HUMAN(RecName: Full=Endothelin-converting enzyme 1; Short=ECE-1)
miR169a-3p	TRINITY_DN11847_c0_g1	2.2	1	20	329	348	GGCAAGTTGTCCTTGGCTAC	:||||||:|||||||:|**|	TCGTTCAGCAGGAACTGCCG					K03381	catA		PF00775.18(Dioxygenase_C:Dioxygenase)		gi|1009181837|ref|XP_015872387.1|( PREDICTED: hydroxyquinol 1,2-dioxygenase-like, partial [Ziziphus jujuba])	gi|209572875|sp|P86029.1|HQD2_CANAL(RecName: Full=Catechol 1,2-dioxygenase)
miR169a-3p	TRINITY_DN45127_c0_g1	2.2	1	20	307	325	GGCAAGTTGTCCTTGGCTAC	:||||||||||*:||||*||	TCGTTCAACAGCGACCG-TG		NOG156433(O:Posttranslational modification, protein turnover, chaperones )		NOG156433(Cysteine proteinase inhibitor)				PF16845.2(SQAPI:Aspartic acid proteinase inhibitor); PF00031.18(Cystatin:Cystatin domain)	GO:0004869(molecular_function:cysteine-type endopeptidase inhibitor activity); GO:0010951(biological_process:negative regulation of endopeptidase activity); GO:0006952(biological_process:defense response); GO:0005576(cellular_component:extracellular region)	gi|937898835|dbj|BAS74815.1|( Os01g0803200, partial [Oryza sativa Japonica Group])	gi|125987817|sp|P09229.2|CYT1_ORYSJ(RecName: Full=Cysteine proteinase inhibitor 1; AltName: Full=Oryzacystatin I; Short=OC-I; AltName: Full=Oryzacystatin-1; AltName: Full=OsCP1; AltName: Full=SPOC-I; Flags: Precursor)
miR166i-3p	TRINITY_DN91558_c0_g7	2.2	1	21	1115	1135	TCGGATCAGGCTTCATTCCTC	:||||:||||||||||:||**	GGCCTGGTCCGAAGTAGGGTC		NOG185548(K:Transcription )		NOG185548(MEKHLA domain)	K09338	HD-ZIP		PF08670.8(MEKHLA:MEKHLA domain); PF01852.16(START:START domain); PF00046.26(Homeobox:Homeobox domain)	GO:0030154(biological_process:cell differentiation); GO:0010014(biological_process:meristem initiation); GO:0009956(biological_process:radial pattern formation); GO:0008289(molecular_function:lipid binding); GO:0010051(biological_process:xylem and phloem pattern formation); GO:0009944(biological_process:polarity specification of adaxial/abaxial axis); GO:0044212(molecular_function:transcription r…	gi|731356182|ref|XP_010689538.1|( PREDICTED: homeobox-leucine zipper protein REVOLUTA-like [Beta vulgaris subsp. vulgaris])	gi|75203823|sp|Q9SE43.2|REV_ARATH(RecName: Full=Homeobox-leucine zipper protein REVOLUTA; AltName: Full=HD-ZIP protein REV; AltName: Full=Homeodomain transcription factor REV; AltName: Full=Protein AMPHIVASAL VASCULAR BUNDLE 1; AltName: Full=Protein INTERFASCICULAR FIBERLESS 1)
miR172c	TRINITY_DN29201_c0_g1	2.2	1	21	330	350	AGAATCTTGATGATGCTGCAG	*|||||:|||||||||::|*|	ACTTAGGACTACTACGGTGAC									GO:0001228(molecular_function:transcriptional activator activity, RNA polymerase II transcription regulatory region sequence-specific binding); GO:0045944(biological_process:positive regulation of transcription from RNA polymerase II promoter); GO:0001046(molecular_function:core promoter sequence-specific DNA binding); GO:0046983(molecular_function:protein dimerization activity); GO:0005634(cellu…	gi|19401700|gb|AAL87667.1|( transcription factor RAU1, partial [Oryza sativa])	gi|75288858|sp|Q66GR3.1|BH130_ARATH(RecName: Full=Transcription factor bHLH130; AltName: Full=Basic helix-loop-helix protein 130; Short=AtbHLH130; Short=bHLH 130; AltName: Full=Transcription factor EN 69; AltName: Full=bHLH transcription factor bHLH130)
miR172c	TRINITY_DN63446_c0_g2	2.2	1	21	204	223	AGAATCTTGATGATGCTGCAG	|||*:|||||||||||||*|:	TCTGGGAACTACTACGAC-TT					K04077	groEL, HSPD1	map03018(RNA degradation)	PF00118.21(Cpn60_TCP1:TCP-1/cpn60 chaperonin family)		gi|694422740|ref|XP_009339195.1|( PREDICTED: LOW QUALITY PROTEIN: ruBisCO large subunit-binding protein subunit beta, chloroplastic-like [Pyrus x bretschneideri])	gi|2506277|sp|P08927.2|RUBB_PEA(RecName: Full=RuBisCO large subunit-binding protein subunit beta, chloroplastic; AltName: Full=60 kDa chaperonin subunit beta; AltName: Full=CPN-60 beta; Flags: Precursor)
miR172c	TRINITY_DN84843_c0_g1	2.2	1	21	835	855	AGAATCTTGATGATGCTGCAG	*|||||*||||||||||:||*	ACTTAGTACTACTACGATGTG								PF07714.14(Pkinase_Tyr:Protein tyrosine kinase); PF00069.22(Pkinase:Protein kinase domain); PF12819.4(Malectin_like:Carbohydrate-binding protein of the ER); PF11721.5(Malectin:Di-glucose binding within endoplasmic reticulum)		gi|902228005|gb|KNA20920.1|( hypothetical protein SOVF_047860 [Spinacia oleracea])	gi|75317972|sp|O22187.1|Y2232_ARATH(RecName: Full=Probable receptor-like protein kinase At2g23200; Flags: Precursor)
miR172c	TRINITY_DN87192_c1_g1	2.2	1	21	63	83	AGAATCTTGATGATGCTGCAG	**||||||||||||||||*|:	AGTTAGAACTACTACGACCTT					K12731	DXMT	map00232(Caffeine metabolism)	PF03492.12(Methyltransf_7:SAM dependent carboxyl methyltransferase)		gi|731315120|ref|XP_010689978.1|( PREDICTED: caffeine synthase 1-like [Beta vulgaris subsp. vulgaris])	gi|75117021|sp|Q68CM3.1|TCS2_CAMSI(RecName: Full=Probable caffeine synthase 2 [Camellia sinensis])
miR172c	TRINITY_DN87899_c7_g1	2.2	1	21	1881	1901	AGAATCTTGATGATGCTGCAG	|||||||||||||*|*|:|||	TCTTAGAACTACTTCTATGTC								PF07714.14(Pkinase_Tyr:Protein tyrosine kinase); PF00069.22(Pkinase:Protein kinase domain); PF00954.17(S_locus_glycop:S-locus glycoprotein domain); PF01453.21(B_lectin:D-mannose binding lectin); PF08276.8(PAN_2:PAN-like domain); PF11883.5(DUF3403:Domain of unknown function (DUF3403))		gi|731354856|ref|XP_010688827.1|( PREDICTED: LOW QUALITY PROTEIN: G-type lectin S-receptor-like serine/threonine-protein kinase At4g27290 [Beta vulgaris subsp. vulgaris])	gi|363548529|sp|O81832.4|Y4729_ARATH(RecName: Full=G-type lectin S-receptor-like serine/threonine-protein kinase At4g27290; Flags: Precursor)
miR390-3p	TRINITY_DN80981_c0_g1	2.2	1	20	16	35	CGCTATCTATCCTGAGCTCC	**|||||||||||||||:*|	AAGATAGATAGGACTCGGTG										gi|731366507|ref|XP_010695109.1|( PREDICTED: uncharacterized protein LOC104907812 [Beta vulgaris subsp. vulgaris])	_
miR1863a	TRINITY_DN89071_c1_g1	2.2	1	24	1001	1023	AGCTCTGATACCATGTTAGATTAG	*|||||||||||||:|||||**|:	CCGAGACTATGGTATAATCT-CTT		NOG162323(S:Function unknown )		NOG162323()						gi|731314782|ref|XP_010688421.1|( PREDICTED: uncharacterized protein LOC104902355 isoform X2 [Beta vulgaris subsp. vulgaris])	_
miR172b	TRINITY_DN29201_c0_g1	2.2	1	21	331	350	GGAATCTTGATGATGCTGCAT	*|||||:|||||||||::|*|	ACTTAGGACTACTACGGTG-A									GO:0001228(molecular_function:transcriptional activator activity, RNA polymerase II transcription regulatory region sequence-specific binding); GO:0045944(biological_process:positive regulation of transcription from RNA polymerase II promoter); GO:0001046(molecular_function:core promoter sequence-specific DNA binding); GO:0046983(molecular_function:protein dimerization activity); GO:0005634(cellu…	gi|19401700|gb|AAL87667.1|( transcription factor RAU1, partial [Oryza sativa])	gi|75288858|sp|Q66GR3.1|BH130_ARATH(RecName: Full=Transcription factor bHLH130; AltName: Full=Basic helix-loop-helix protein 130; Short=AtbHLH130; Short=bHLH 130; AltName: Full=Transcription factor EN 69; AltName: Full=bHLH transcription factor bHLH130)
miR172b	TRINITY_DN90510_c0_g1	2.2	1	21	3383	3403	GGAATCTTGATGATGCTGCAT	*|||*|:||||||||||:|||	GCTTCGGACTACTACGATGTA								PF01535.17(PPR:PPR repeat); PF13041.3(PPR_2:PPR repeat family); PF14432.3(DYW_deaminase:DYW family of nucleic acid deaminases); PF12854.4(PPR_1:PPR repeat); PF13812.3(PPR_3:Pentatricopeptide repeat domain); PF17177.1(PPR_long:Pentacotripeptide-repeat region of PROPR); PF13428.3(TPR_14:Tetratricopeptide repeat); PF05529.9(Bap31:B-cell receptor-associated protein 31-like); PF05266.11(DUF724:Protein…	GO:0008270(molecular_function:zinc ion binding)	gi|902228605|gb|KNA21183.1|( hypothetical protein SOVF_045710 [Spinacia oleracea])	gi|75273633|sp|Q9LJR6.1|PP253_ARATH(RecName: Full=Putative pentatricopeptide repeat-containing protein At3g25060, mitochondrial; Flags: Precursor)
miR172b	TRINITY_DN92094_c0_g5	2.2	1	21	1948	1967	GGAATCTTGATGATGCTGCAT	:|||||||||||*||||*||*	TCTTAGAACTACAACGA-GTT					K17491	SMEK, PPP4R3		PF04802.12(SMK-1:Component of IIS longevity pathway SMK-1)		gi|902208061|gb|KNA15844.1|( hypothetical protein SOVF_094540 [Spinacia oleracea])	gi|82184832|sp|Q6INN7.1|PP4R3_XENLA(RecName: Full=Serine/threonine-protein phosphatase 4 regulatory subunit 3; AltName: Full=SMEK homolog 1)
miR169j	TRINITY_DN88802_c2_g3	2.2	1	21	2771	2791	TAGCCAAGGATGACTTGCCTG	*||||||||||||*|||||*:	TTCGGTTCCTACTCAACGGTT					K08064	NFYA		PF02045.12(CBFB_NFYA:CCAAT-binding transcription factor (CBF-B/NF-YA) subunit B)		gi|902218597|gb|KNA18080.1|( hypothetical protein SOVF_074230 [Spinacia oleracea])	gi|75213441|sp|Q9SYH4.1|NFYA5_ARATH(RecName: Full=Nuclear transcription factor Y subunit A-5; Short=AtNF-YA-5)
miR396a-3p	TRINITY_DN88296_c1_g4	2.2	1	21	936	956	GTTCAATAAAGCTGTGGGAAG	||||||||||||*|||:*||:	CAAGTTATTTCGTCACTATTT									GO:0006468(biological_process:protein phosphorylation); GO:0005524(molecular_function:ATP binding); GO:0016021(cellular_component:integral component of membrane); GO:0004674(molecular_function:protein serine/threonine kinase activity)	gi|697177629|ref|XP_009597781.1|( PREDICTED: probable serine/threonine-protein kinase At1g01540 isoform X1 [Nicotiana tomentosiformis])	gi|158564340|sp|Q3EDL4.2|Y1154_ARATH(RecName: Full=Probable serine/threonine-protein kinase At1g01540)
miR396a-3p	TRINITY_DN88482_c0_g2	2.2	1	21	1988	2008	GTTCAATAAAGCTGTGGGAAG	:|||||||||||||:|:*|*|	TAAGTTATTTCGACGCTATAC					K12837	U2AF2	map03040(Spliceosome)			gi|902116692|gb|KNA03909.1|( hypothetical protein SOVF_204680 [Spinacia oleracea])	gi|4033485|sp|Q24562.1|U2AF2_DROME(RecName: Full=Splicing factor U2AF 50 kDa subunit; AltName: Full=U2 auxiliary factor 50 kDa subunit; AltName: Full=U2 snRNP auxiliary factor large subunit)
miR396a-3p	TRINITY_DN88908_c0_g3	2.2	1	21	1243	1263	GTTCAATAAAGCTGTGGGAAG	|||||||||||||:||*:|*|	CAAGTTATTTCGATACGTTAC					K14409	SMG7, EST1C	map03015(mRNA surveillance pathway)	PF10373.6(EST1_DNA_bind:Est1 DNA/RNA binding domain); PF10374.6(EST1:Telomerase activating protein Est1)		gi|731325920|ref|XP_010673759.1|( PREDICTED: protein SMG7 [Beta vulgaris subsp. vulgaris])	gi|510785808|sp|A9QM73.1|SMG7_ARATH(RecName: Full=Protein SMG7; AltName: Full=SMG7 homolog)
miR396a-3p	TRINITY_DN89054_c3_g3	2.2	1	21	925	945	GTTCAATAAAGCTGTGGGAAG	:|||||||||||:||||***|	TAAGTTATTTCGGCACCAGCC									GO:0016020(cellular_component:membrane)	gi|731310562|ref|XP_010677566.1|( PREDICTED: phosphatidylinositol 4-phosphate 5-kinase 4 [Beta vulgaris subsp. vulgaris])	_
miR395h	TRINITY_DN104825_c0_g1	2.5	1	21	76	95	ATGAAGTGTTTGGGGGAACTT	||||||:|||||*:||||*||	TACTTCGCAAACATCCTT-AA					K01915	glnA, GLUL	map00630(Glyoxylate and dicarboxylate metabolism); map00220(Arginine biosynthesis); map00250(Alanine, aspartate and glutamate metabolism); map00910(Nitrogen metabolism)	PF00120.21(Gln-synt_C:Glutamine synthetase, catalytic domain)	GO:0016880(molecular_function:acid-ammonia (or amide) ligase activity); GO:0006807(biological_process:nitrogen compound metabolic process)	gi|1026756287|gb|OAE18762.1|( hypothetical protein AXG93_2396s1130 [Marchantia polymorpha subsp. polymorpha])	gi|302425102|sp|A0R079.1|GLNA1_MYCS2(RecName: Full=Glutamine synthetase 1; AltName: Full=Glutamate--ammonia ligase)
miR395h	TRINITY_DN123948_c0_g1	2.5	1	21	168	188	ATGAAGTGTTTGGGGGAACTT	|*|||:|||||||||||**||	TCCTTTACAAACCCCCTATAA										gi|661894581|emb|CDP01580.1|( unnamed protein product [Coffea canephora])	gi|75264223|sp|Q9LTA3.1|U91C1_ARATH(RecName: Full=UDP-glycosyltransferase 91C1)
miR395h	TRINITY_DN127147_c0_g1	2.5	1	21	170	190	ATGAAGTGTTTGGGGGAACTT	|:|||||||||||*|||**||	TGCTTCACAAACCACCTATAA					K01953	asnB, ASNS	map00250(Alanine, aspartate and glutamate metabolism)	PF00733.18(Asn_synthase:Asparagine synthase)	GO:0004066(molecular_function:asparagine synthase (glutamine-hydrolyzing) activity); GO:0006529(biological_process:asparagine biosynthetic process)	gi|29373952|emb|CAD71256.1|( asparagine synthetase 3 [Lotus japonicus])	gi|399064|sp|P31752.2|ASNS_ASPOF(RecName: Full=Asparagine synthetase [glutamine-hydrolyzing]; Short=AS)
miR395h	TRINITY_DN88157_c1_g1	2.5	1	21	1737	1756	ATGAAGTGTTTGGGGGAACTT	||||*|||||||:|:||*|||	TACTGCACAAACTCTCT-GAA		NOG13643(S:Function unknown )		NOG13643(Exocyst complex component)	K07195	EXOC7, EXO70		PF03081.12(Exo70:Exo70 exocyst complex subunit)	GO:0000145(cellular_component:exocyst); GO:0006887(biological_process:exocytosis)	gi|902149707|gb|KNA05342.1|( hypothetical protein SOVF_191250 [Spinacia oleracea])	gi|75181250|sp|Q9LZD3.1|E70A1_ARATH(RecName: Full=Exocyst complex component EXO70A1; Short=AtExo70a1; AltName: Full=Exocyst subunit Exo70 family protein A1)
miR395h	TRINITY_DN90828_c3_g5	2.5	1	21	281	300	ATGAAGTGTTTGGGGGAACTT	|||||||||||||:||***||	TACTTCACAAACCTCC-AAAA										gi|922547854|ref|XP_013601861.1|( PREDICTED: uncharacterized protein LOC106309379 [Brassica oleracea var. oleracea])	_
miR395h	TRINITY_DN91867_c1_g1	2.5	1	21	1813	1832	ATGAAGTGTTTGGGGGAACTT	*|||||*||:|||||||*|||	AACTTCTCAGACCCCCT-GAA					K04730	IRAK1		PF07714.14(Pkinase_Tyr:Protein tyrosine kinase); PF00069.22(Pkinase:Protein kinase domain); PF12819.4(Malectin_like:Carbohydrate-binding protein of the ER); PF11721.5(Malectin:Di-glucose binding within endoplasmic reticulum)		gi|731316047|ref|XP_010694005.1|( PREDICTED: putative receptor-like protein kinase At5g39000 isoform X1 [Beta vulgaris subsp. vulgaris])	gi|75337066|sp|Q9SCZ4.1|FERON_ARATH(RecName: Full=Receptor-like protein kinase FERONIA; AltName: Full=Protein SIRENE; Flags: Precursor)
miR395h	TRINITY_DN93249_c1_g1	2.5	1	21	92	113	ATGAAGTGTTTGGGGGAAC-TT	|||||:|||*|||:|||||*||	TACTTTACATACCTCCTTGTAA					K20893	PARVUS, GLZ1, GATL1		PF01501.17(Glyco_transf_8:Glycosyl transferase family 8)	GO:0016757(molecular_function:transferase activity, transferring glycosyl groups)	gi|731339560|ref|XP_010680924.1|( PREDICTED: probable galacturonosyltransferase-like 1 [Beta vulgaris subsp. vulgaris])	gi|75193862|sp|Q9S7G2.1|GATL2_ARATH(RecName: Full=Probable galacturonosyltransferase-like 2)
miR165a-3p	TRINITY_DN99116_c0_g1	2.5	1	21	38	58	TCGGACCAGGCTTCATCCCCC	*|||||*|:||||||||*|||	TGCCTGCTTCGAAGTAGTGGG								PF13622.3(4HBT_3:Thioesterase-like superfamily); PF02551.12(Acyl_CoA_thio:Acyl-CoA thioesterase)	GO:0047617(molecular_function:acyl-CoA hydrolase activity)	gi|674781080|gb|AIL29214.1|( acyl-CoA thioesterase [Camellia oleifera])	gi|14548007|sp|P58137.1|ACOT8_MOUSE(RecName: Full=Acyl-coenzyme A thioesterase 8; Short=Acyl-CoA thioesterase 8; AltName: Full=Choloyl-coenzyme A thioesterase; AltName: Full=Peroxisomal acyl-CoA thioesterase 2; Short=PTE-2; AltName: Full=Peroxisomal acyl-coenzyme A thioester hydrolase 1; Short=PTE-1; AltName: Full=Peroxisomal long-chain acyl-CoA thioesterase 1)
miR160c-3p	TRINITY_DN104320_c0_g1	2.5	1	21	84	103	GCGTGCACGGAGCCAAGCATA	||||||*||||||||*|||*|	CGCACGCGCCTCGGTACGT-T					K05664	ABCB11	map02010(ABC transporters)	PF00005.24(ABC_tran:ABC transporter)	GO:0042626(molecular_function:ATPase activity, coupled to transmembrane movement of substances); GO:0055085(biological_process:transmembrane transport); GO:0016021(cellular_component:integral component of membrane); GO:0000166(molecular_function:nucleotide binding)	gi|971520087|dbj|GAQ78132.1|( ATP binding cassette subfamily B [Klebsormidium flaccidum])	gi|12585136|sp|O70127.1|ABCBB_RAT(RecName: Full=Bile salt export pump; AltName: Full=ATP-binding cassette sub-family B member 11; AltName: Full=Sister of P-glycoprotein)
miR160c-3p	TRINITY_DN91819_c0_g4	2.5	1	21	677	696	GCGTGCACGGAGCCAAGCATA	|*||||||||||||||:*|*|	CTCACGTGCCTCGGTTTCT-T										gi|731350382|ref|XP_010686475.1|( PREDICTED: uncharacterized protein LOC104900682 [Beta vulgaris subsp. vulgaris])	gi|45477041|sp|P92519.1|M810_ARATH(RecName: Full=Uncharacterized mitochondrial protein AtMg00810; AltName: Full=ORF240b)
miR159d	TRINITY_DN62975_c0_g1	2.5	1	21	62	82	ATTGGATTGAAGGGAGCTCCG	|:|:||||||||||||*||*|	TGATCTAACTTCCCTCTAGAC		NOG50883(S:Function unknown )		NOG50883()					GO:0016021(cellular_component:integral component of membrane)	gi|37718892|gb|AAR01763.1|( hypothetical protein [Oryza sativa Japonica Group])	_
miR159d	TRINITY_DN90304_c1_g3	2.5	1	21	1480	1500	ATTGGATTGAAGGGAGCTCCG	||||||:|||||||*:||||*	TAACCTGACTTCCCATGAGGG								PF03634.10(TCP:TCP family transcription factor); PF03732.14(Retrotrans_gag:Retrotransposon gag protein)		gi|731356574|ref|XP_010689747.1|( PREDICTED: transcription factor TCP4-like [Beta vulgaris subsp. vulgaris])	gi|75157409|sp|Q8LPR5.1|TCP4_ARATH(RecName: Full=Transcription factor TCP4; AltName: Full=Protein MATERNAL EFFECT EMBRYO ARREST 35)
miR164b	TRINITY_DN122176_c0_g1	2.5	1	21	202	222	TGGAGAAGCAGGGCACGTGCA	||||:|||||||||*||||**	ACCTTTTCGTCCCGGGCACCC					K03469	rnhA, RNASEH1	map03030(DNA replication)	PF00075.21(RNase_H:RNase H)			gi|6685892|sp|O83372.1|RNH_TREPA(RecName: Full=Ribonuclease H; Short=RNase H >gi|238689319|sp|B2S2V0.1|RNH_TREPS RecName: Full=Ribonuclease H; Short=RNase H)
miR164b	TRINITY_DN86078_c0_g2	2.5	1	21	1830	1851	TGGAGAAGCAGGGCACGTGC-A	||||||*||||:||||||*|*|	ACCTCTCCGTCTCGTGCAAGCT	COG0480(J:Translation, ribosomal structure and biogenesis )		COG0480(Catalyzes the GTP-dependent ribosomal translocation step during translation elongation. During this step, the ribosome changes from the pre-translocational (PRE) to the post- translocational (POST) state as the newly formed A-site-bound peptidyl-tRNA and P-site-bound deacylated tRNA move to the P and E sites, respectively. Catalyzes the coordinated movement of the two tRNA molecules, the …		K03234	EEF2		PF00009.24(GTP_EFTU:Elongation factor Tu GTP binding domain); PF03764.15(EFG_IV:Elongation factor G, domain IV); PF00679.21(EFG_C:Elongation factor G C-terminus); PF14492.3(EFG_II:Elongation Factor G, domain II); PF03144.22(GTP_EFTU_D2:Elongation factor Tu domain 2); PF01926.20(MMR_HSR1:50S ribosome-binding GTPase)	GO:0003924(molecular_function:GTPase activity); GO:0005525(molecular_function:GTP binding)	gi|326497203|dbj|BAK02186.1|( predicted protein [Hordeum vulgare subsp. vulgare])	gi|119172|sp|P13639.4|EF2_HUMAN(RecName: Full=Elongation factor 2; Short=EF-2 >gi|88909610|sp|Q5R8Z3.3|EF2_PONAB RecName: Full=Elongation factor 2; Short=EF-2)
miR164b	TRINITY_DN86800_c2_g4	2.5	1	21	2507	2528	TGGAGAAGCAGGGCACGT-GCA	*||||||:|||||*||||*|||	TCCTCTTTGTCCCCTGCAGCGT								PF02493.17(MORN:MORN repeat)		gi|870847547|gb|KMS99894.1|( hypothetical protein BVRB_1g017420 [Beta vulgaris subsp. vulgaris])	gi|78099094|sp|Q8L850.2|PI5K9_ARATH(RecName: Full=Phosphatidylinositol 4-phosphate 5-kinase 9; Short=AtPIP5K9; AltName: Full=1-phosphatidylinositol 4-phosphate kinase 9; AltName: Full=Diphosphoinositide kinase 9; AltName: Full=PtdIns(4)P-5-kinase 9)
miR164b	TRINITY_DN89326_c1_g6	2.5	1	21	1307	1327	TGGAGAAGCAGGGCACGTGCA	|::||||||||:||||||*|*	ATTTCTTCGTCTCGTGCAAGA		NOG127018(G:Carbohydrate transport and metabolism )		NOG127018(Galacturonosyltransferase)	K13648	GAUT	map00520(Amino sugar and nucleotide sugar metabolism)	PF01501.17(Glyco_transf_8:Glycosyl transferase family 8)	GO:0047262(molecular_function:polygalacturonate 4-alpha-galacturonosyltransferase activity); GO:0000139(cellular_component:Golgi membrane); GO:0045489(biological_process:pectin biosynthetic process); GO:0071555(biological_process:cell wall organization); GO:0016021(cellular_component:integral component of membrane)	gi|902193298|gb|KNA12263.1|( hypothetical protein SOVF_127580 [Spinacia oleracea])	gi|357528801|sp|Q0WQD2.2|GAUT3_ARATH(RecName: Full=Probable galacturonosyltransferase 3)
miR164b	TRINITY_DN89422_c2_g5	2.5	1	21	1125	1144	TGGAGAAGCAGGGCACGTGCA	||:|||||||:||*|||||*|	ACTTCTTCGTTCCCTGCAC-T								PF03732.14(Retrotrans_gag:Retrotransposon gag protein)		gi|731340224|ref|XP_010681279.1|( PREDICTED: uncharacterized protein LOC104896263 [Beta vulgaris subsp. vulgaris])	_
miR164b	TRINITY_DN89631_c0_g1	2.5	1	21	72	92	TGGAGAAGCAGGGCACGTGCA	*||||||||||:|||*||||*	TCCTCTTCGTCTCGTCCACGA	COG5434(M:Cell wall/membrane/envelope biogenesis )		COG5434(Glycoside hydrolase family 28)					PF00295.14(Glyco_hydro_28:Glycosyl hydrolases family 28); PF12708.4(Pectate_lyase_3:Pectate lyase superfamily protein)	GO:0005975(biological_process:carbohydrate metabolic process); GO:0005576(cellular_component:extracellular region); GO:0004650(molecular_function:polygalacturonase activity); GO:0071555(biological_process:cell wall organization)	gi|902220587|gb|KNA18657.1|( hypothetical protein SOVF_068750 [Spinacia oleracea])	gi|75306312|sp|Q949Z1.1|PGLR4_ARATH(RecName: Full=Polygalacturonase At1g48100; Short=PG; AltName: Full=Pectinase At1g48100; Flags: Precursor)
miR156l-5p	TRINITY_DN82303_c0_g1	2.5	1	21	1243	1262	CGACAGAAGAGAGTGAGCATA	|:|||||||||||*:||*|||	GTTGTCTTCTCTCTTTC-TAT								PF11204.5(DUF2985:Protein of unknown function (DUF2985)); PF04749.14(PLAC8:PLAC8 family)	GO:0016020(cellular_component:membrane)	gi|731344737|ref|XP_010683576.1|( PREDICTED: uncharacterized protein LOC104898227 [Beta vulgaris subsp. vulgaris])	_
miR156l-5p	TRINITY_DN83399_c0_g2	2.5	1	21	215	235	CGACAGAAGAGAGTGAGCATA	|:|||||||||||||*:*|||	GTTGTCTTCTCTCACCTCTAT		NOG30915(S:Function unknown )		NOG30915(family with sequence similarity 206, member A)				PF01597.16(GCV_H:Glycine cleavage H-protein)		gi|731374269|ref|XP_010666915.1|( PREDICTED: protein Simiate [Beta vulgaris subsp. vulgaris])	gi|74855284|sp|Q54TD9.1|F206_DICDI(RecName: Full=FAM206 family protein)
miR156l-5p	TRINITY_DN87520_c1_g2	2.5	1	21	421	441	CGACAGAAGAGAGTGAGCATA	*||*||||:|||||||||*||	CCTCTCTTTTCTCACTCGGAT	COG1947(I:Lipid transport and metabolism )		COG1947(Catalyzes the phosphorylation of the position 2 hydroxy group of 4-diphosphocytidyl-2C-methyl-D-erythritol (By similarity))		K00919	ispE	map00900(Terpenoid backbone biosynthesis)	PF00288.23(GHMP_kinases_N:GHMP kinases N terminal domain)	GO:0016310(biological_process:phosphorylation); GO:0016114(biological_process:terpenoid biosynthetic process); GO:0050515(molecular_function:4-(cytidine 5'-diphospho)-2-C-methyl-D-erythritol kinase activity); GO:0005524(molecular_function:ATP binding)	gi|731342158|ref|XP_010682260.1|( PREDICTED: 4-diphosphocytidyl-2-C-methyl-D-erythritol kinase, chloroplastic [Beta vulgaris subsp. vulgaris])	gi|7227898|sp|P93841.1|ISPE_SOLLC(RecName: Full=4-diphosphocytidyl-2-C-methyl-D-erythritol kinase, chloroplastic/chromoplastic; AltName: Full=4-(cytidine-5'-diphospho)-2-C-methyl-D-erythritol kinase; Short=CMK; AltName: Full=Ripening-associated protein pTOM41; Flags: Precursor)
miR156l-5p	TRINITY_DN89331_c0_g2	2.5	1	21	133	153	CGACAGAAGAGAGTGAGCATA	*|||||||:|||:|:|||*||	ACTGTCTTTTCTTATTCGAAT								PF12507.5(HCMV_UL139:Human Cytomegalovirus UL139 protein); PF06839.9(zf-GRF:GRF zinc finger)		gi|902172082|gb|KNA08077.1|( hypothetical protein SOVF_165950 [Spinacia oleracea])	_
miR156l-5p	TRINITY_DN89603_c1_g2	2.5	1	21	2483	2502	CGACAGAAGAGAGTGAGCATA	*|||||||||:||:||||*|*	TCTGTCTTCTTTCGCTCG-AG					K04567	KARS, lysS	map00970(Aminoacyl-tRNA biosynthesis)	PF00152.17(tRNA-synt_2:tRNA synthetases class II (D, K and N)); PF01409.17(tRNA-synt_2d:tRNA synthetases class II core domain (F))	GO:0003676(molecular_function:nucleic acid binding); GO:0004824(molecular_function:lysine-tRNA ligase activity); GO:0005524(molecular_function:ATP binding); GO:0006430(biological_process:lysyl-tRNA aminoacylation); GO:0005737(cellular_component:cytoplasm)	gi|731323066|ref|XP_010672231.1|( PREDICTED: lysine--tRNA ligase-like [Beta vulgaris subsp. vulgaris])	gi|55583785|sp|Q6F2U9.1|SYK_ORYSJ(RecName: Full=Lysine--tRNA ligase; AltName: Full=Lysyl-tRNA synthetase; Short=LysRS)
miR156l-5p	TRINITY_DN92984_c1_g2	2.5	1	21	622	642	CGACAGAAGAGAGTGAGCATA	*|||||||||*||||||**||	TCTGTCTTCTATCACTCAGAT									GO:0090502(biological_process:RNA phosphodiester bond hydrolysis, endonucleolytic); GO:0005655(cellular_component:nucleolar ribonuclease P complex); GO:0004526(molecular_function:ribonuclease P activity)	gi|1012346439|gb|KYP57631.1|( hypothetical protein KK1_003896 [Cajanus cajan])	gi|13432215|sp|O26355.2|RL7A_METTH(RecName: Full=50S ribosomal protein L7Ae; AltName: Full=Ribosomal protein L8e)
miR390b	TRINITY_DN85996_c1_g9	2.5	1	21	1283	1303	AAGCTCAGGAGGGATAGCGCC	||||||||||::|*|||*|||	TTCGAGTCCTTTCGATCCCGG									GO:0006662(biological_process:glycerol ether metabolic process); GO:0031977(cellular_component:thylakoid lumen); GO:0055114(biological_process:oxidation-reduction process); GO:0000103(biological_process:sulfate assimilation); GO:0006457(biological_process:protein folding); GO:0045454(biological_process:cell redox homeostasis); GO:0034599(biological_process:cellular response to oxidative stress); …	gi|731317535|ref|XP_010669243.1|( PREDICTED: thioredoxin-like protein HCF164, chloroplastic [Beta vulgaris subsp. vulgaris])	gi|75097745|sp|O23166.2|TR164_ARATH(RecName: Full=Thioredoxin-like protein HCF164, chloroplastic; AltName: Full=Protein HIGH CHLOROPHYLL FLUORESCENCE 164; Flags: Precursor)
miR169d	TRINITY_DN89884_c0_g1	2.5	1	21	2371	2391	TAGCCAAGGATGAATTGCCGG	|||*|||:|||:||||||*||	ATCAGTTTCTATTTAACGACC								PF01535.17(PPR:PPR repeat); PF13041.3(PPR_2:PPR repeat family); PF12854.4(PPR_1:PPR repeat); PF13812.3(PPR_3:Pentatricopeptide repeat domain); PF17177.1(PPR_long:Pentacotripeptide-repeat region of PROPR); PF08766.8(DEK_C:DEK C terminal domain)		gi|902102388|gb|KNA03554.1|( hypothetical protein SOVF_208030 [Spinacia oleracea])	gi|75180299|sp|Q9LR69.1|PPR8_ARATH(RecName: Full=Pentatricopeptide repeat-containing protein At1g03540)
miR169d	TRINITY_DN91066_c1_g7	2.5	1	21	1054	1074	TAGCCAAGGATGAATTGCCGG	||:|||||||*:||||||*||	ATTGGTTCCTTTTTAACGACC								PF14215.3(bHLH-MYC_N:bHLH-MYC and R2R3-MYB transcription factors N-terminal); PF00010.23(HLH:Helix-loop-helix DNA-binding domain)		gi|731311252|ref|XP_010696336.1|( PREDICTED: transcription factor bHLH13-like [Beta vulgaris subsp. vulgaris])	gi|75315651|sp|Q9ZPY8.2|AIB_ARATH(RecName: Full=Transcription factor ABA-INDUCIBLE bHLH-TYPE; Short=AtAIB; AltName: Full=Basic helix-loop-helix protein 17; Short=AtbHLH17; Short=bHLH 17; AltName: Full=Transcription factor EN 35; AltName: Full=bHLH transcription factor bHLH017)
miR399n	TRINITY_DN132894_c0_g1	2.5	1	21	61	80	TGCCAAAGGAGAGCTGCCCTA	|||||||:||||||||**|*|	ACGGTTTTCTCTCGACCCG-T					K06255	HSPG2		PF00052.15(Laminin_B:Laminin B (Domain IV))			gi|317373536|sp|P98160.4|PGBM_HUMAN(RecName: Full=Basement membrane-specific heparan sulfate proteoglycan core protein; Short=HSPG; AltName: Full=Perlecan; Short=PLC; Contains: RecName: Full=Endorepellin; Contains: RecName: Full=LG3 peptide; Flags: Precursor)
miR399n	TRINITY_DN84435_c0_g1	2.5	1	21	4159	4178	TGCCAAAGGAGAGCTGCCCTA	|||||||||||||*||**|||	ACGGTTTCCTCTCCAC-TGAT								PF14309.3(DUF4378:Domain of unknown function (DUF4378))		gi|731319242|ref|XP_010670156.1|( PREDICTED: protein LONGIFOLIA 1-like [Beta vulgaris subsp. vulgaris])	gi|75174038|sp|Q9LF24.1|LNG1_ARATH(RecName: Full=Protein LONGIFOLIA 1; AltName: Full=Protein TON1 RECRUITING MOTIF 2)
miR403b	TRINITY_DN85620_c4_g2	2.5	1	21	506	526	TTAGATTCACGCACAAACTCG	|||**||||||||||||||*|	AATAGAAGTGCGTGTTTGAAC					K19039	ATL7_58_59			GO:0008270(molecular_function:zinc ion binding); GO:0016021(cellular_component:integral component of membrane)	gi|698503987|ref|XP_009797549.1|( PREDICTED: RING-H2 finger protein ATL58-like [Nicotiana sylvestris])	gi|68565338|sp|Q9SN28.1|ATL7_ARATH(RecName: Full=RING-H2 finger protein ATL7)
miR403b	TRINITY_DN85670_c0_g1	2.5	1	21	2016	2036	TTAGATTCACGCACAAACTCG	|||:*|||||*||||||||||	AATTAAAGTGAGTGTTTGAGC	COG0480(J:Translation, ribosomal structure and biogenesis )		COG0480(Catalyzes the GTP-dependent ribosomal translocation step during translation elongation. During this step, the ribosome changes from the pre-translocational (PRE) to the post- translocational (POST) state as the newly formed A-site-bound peptidyl-tRNA and P-site-bound deacylated tRNA move to the P and E sites, respectively. Catalyzes the coordinated movement of the two tRNA molecules, the …		K02355	fusA, GFM, EFG		PF00009.24(GTP_EFTU:Elongation factor Tu GTP binding domain); PF03764.15(EFG_IV:Elongation factor G, domain IV); PF14492.3(EFG_II:Elongation Factor G, domain II); PF00679.21(EFG_C:Elongation factor G C-terminus); PF03144.22(GTP_EFTU_D2:Elongation factor Tu domain 2); PF16658.2(RF3_C:Class II release factor RF3, C-terminal domain); PF00515.25(TPR_1:Tetratricopeptide repeat); PF07719.14(TPR_2:Tetra…	GO:0003746(molecular_function:translation elongation factor activity); GO:0006414(biological_process:translational elongation); GO:0003924(molecular_function:GTPase activity); GO:0009507(cellular_component:chloroplast); GO:0005525(molecular_function:GTP binding)	gi|731330541|ref|XP_010676186.1|( PREDICTED: elongation factor G-2, chloroplastic [Beta vulgaris subsp. vulgaris])	gi|575773381|sp|P34811.2|EFGC1_SOYBN(RecName: Full=Elongation factor G-1, chloroplastic; Short=cEF-G 1; Flags: Precursor)
miR403b	TRINITY_DN89149_c4_g8	2.5	1	21	2505	2525	TTAGATTCACGCACAAACTCG	:||:||||||*|||||||:|*	GATTTAAGTGGGTGTTTGGGA										gi|870853003|gb|KMT04884.1|( hypothetical protein BVRB_7g170510 [Beta vulgaris subsp. vulgaris])	_
miR403b	TRINITY_DN89328_c4_g8	2.5	1	21	373	392	TTAGATTCACGCACAAACTCG	*||||||||||*|||||*|*|	CATCTAAGTGCTTGTTT-ATC	COG5411(T:Signal transduction mechanisms )		COG5411(inositol)					PF03372.20(Exo_endo_phos:Endonuclease/Exonuclease/phosphatase family); PF00635.23(Motile_Sperm:MSP (Major sperm protein) domain)	GO:0046856(biological_process:phosphatidylinositol dephosphorylation); GO:0016787(molecular_function:hydrolase activity)	gi|731323574|ref|XP_010672504.1|( PREDICTED: type I inositol 1,4,5-trisphosphate 5-phosphatase 12 isoform X2 [Beta vulgaris subsp. vulgaris])	gi|857434451|sp|O80560.2|IP5PC_ARATH(RecName: Full=Type I inositol polyphosphate 5-phosphatase 12; Short=At5PTase12)
miR2111f	TRINITY_DN87909_c1_g1	2.5	1	21	248	269	TAATCTGCATCCTGAGGTT-TA	|||||:||||||:||:|:|*:|	ATTAGGCGTAGGGCTTCGACGT					K04460	PPP5C		PF10536.6(PMD:Plant mobile domain)		gi|1021044569|gb|KZN02350.1|( hypothetical protein DCAR_011104 [Daucus carota subsp. sativus])	_
miR2111f	TRINITY_DN92221_c0_g1	2.5	1	21	486	507	TAATCTGCATCCTGAGGT-TTA	||||||||||*|||||:|*||*	ATTAGACGTAAGACTCTACAAC		NOG40802(K:Transcription )		NOG40802(Component of the nascent polypeptide-associated complex (NAC), a dynamic component of the ribosomal exit tunnel, protecting the emerging polypeptides from interaction with other cytoplasmic proteins to ensure appropriate nascent protein targeting (By similarity). The NAC complex also promotes mitochondrial protein import by enhancing productive ribosome interactions with the outer mitoch…	K01527	EGD1, BTF3		PF01849.15(NAC:NAC domain)	GO:0006355(biological_process:regulation of transcription, DNA-templated)	gi|731312251|ref|XP_010673263.1|( PREDICTED: nascent polypeptide-associated complex subunit beta-like [Beta vulgaris subsp. vulgaris])	gi|75274641|sp|Q9SMW7.1|BTF3_ARATH(RecName: Full=Basic transcription factor 3; Short=AtBTF3; AltName: Full=Nascent polypeptide-associated complex subunit beta)
miR168a	TRINITY_DN48316_c0_g2	2.5	1	21	164	184	TTGCTTGGTGCTGGTCGGGAA	|||||:||||*||:|||*|||	AACGAGCCACTACTAGCACTT									GO:0006950(biological_process:response to stress)	gi|727473083|ref|XP_010518486.1|( PREDICTED: universal stress protein A-like protein [Camelina sativa])	_
miR168a	TRINITY_DN49348_c0_g1	2.5	1	21	261	281	TTGCTTGGTGCTGGTCGGGAA	:||||||||||:||*|::|||	GACGAACCACGGCCCGTTCTT					K19950	SEC9					gi|62900891|sp|O74786.1|SEC9_SCHPO(RecName: Full=Protein transport protein sec9)
miR5523	TRINITY_DN88807_c2_g1	2.5	1	22	459	480	TGAGGAGGAACATATTTACTAG	**||||||*|||||||||||||	TATCCTCCCTGTATAAATGATC					K20600	MPK4	map04016(MAPK signaling pathway - plant)	PF00069.22(Pkinase:Protein kinase domain); PF07714.14(Pkinase_Tyr:Protein tyrosine kinase)	GO:0004707(molecular_function:MAP kinase activity); GO:0005622(cellular_component:intracellular); GO:0000165(biological_process:MAPK cascade); GO:0005524(molecular_function:ATP binding)	gi|947051304|gb|KRH00833.1|( hypothetical protein GLYMA_18G236800 [Glycine max])	gi|21431795|sp|Q39024.2|MPK4_ARATH(RecName: Full=Mitogen-activated protein kinase 4; Short=AtMPK4; Short=MAP kinase 4)
miR319a	TRINITY_DN88915_c0_g1	2.5	1	21	3840	3861	TTGGACTGAAGGGAGCTC-CCT	||||||||||||*||*||*|||	AACCTGACTTCCGTCTAGTGGA								PF00078.24(RVT_1:Reverse transcriptase (RNA-dependent DNA polymerase)); PF03372.20(Exo_endo_phos:Endonuclease/Exonuclease/phosphatase family); PF13966.3(zf-RVT:zinc-binding in reverse transcriptase); PF14111.3(DUF4283:Domain of unknown function (DUF4283)); PF14392.3(zf-CCHC_4:Zinc knuckle)		gi|743921209|ref|XP_011004665.1|( PREDICTED: uncharacterized protein LOC105111104, partial [Populus euphratica])	gi|74705367|sp|O00370.1|LORF2_HUMAN(RecName: Full=LINE-1 retrotransposable element ORF2 protein; Short=ORF2p; Includes: RecName: Full=Reverse transcriptase; Includes: RecName: Full=Endonuclease)
miR319a	TRINITY_DN89893_c1_g1	2.5	1	21	896	916	TTGGACTGAAGGGAGCTCCCT	|||||||||||||*:|:||*|	AACCTGACTTCCCATGGGGAA								PF03634.10(TCP:TCP family transcription factor)		gi|731356574|ref|XP_010689747.1|( PREDICTED: transcription factor TCP4-like [Beta vulgaris subsp. vulgaris])	gi|75157409|sp|Q8LPR5.1|TCP4_ARATH(RecName: Full=Transcription factor TCP4; AltName: Full=Protein MATERNAL EFFECT EMBRYO ARREST 35)
miR160g	TRINITY_DN90282_c2_g1	2.5	1	21	894	914	TGCCTGGCTCCTTGTATGCCA	|||*||||||||::||:||||	ACGAACCGAGGAGTATGCGGT										gi|870851588|gb|KMT03626.1|( hypothetical protein BVRB_8g190380 [Beta vulgaris subsp. vulgaris])	_
miR171c-5p	TRINITY_DN83885_c0_g2	2.5	1	21	54	73	GGATATTGGTGCGGTTCAATC	||||||||||:|||||*|*|*	CCTATAACCATGCCAA-TCAT										gi|147864248|emb|CAN83015.1|( hypothetical protein VITISV_041694 [Vitis vinifera])	gi|130582|sp|P10978.1|POLX_TOBAC(RecName: Full=Retrovirus-related Pol polyprotein from transposon TNT 1-94; Includes: RecName: Full=Protease; Includes: RecName: Full=Reverse transcriptase; Includes: RecName: Full=Endonuclease)
miR171c-5p	TRINITY_DN84136_c0_g2	2.5	1	21	1375	1395	GGATATTGGTGCGGTTCAATC	*||:|||||||||||:|||**	GCTGTAACCACGCCAGGTTCC								PF02383.15(Syja_N:SacI homology domain)	GO:0009987(biological_process:cellular process)	gi|731347953|ref|XP_010685247.1|( PREDICTED: phosphoinositide phosphatase SAC2-like [Beta vulgaris subsp. vulgaris])	gi|75164903|sp|Q94A27.1|SAC2_ARATH(RecName: Full=Phosphoinositide phosphatase SAC2; Short=AtSAC2; AltName: Full=Phosphatidylinositol 3,5-bisphosphate 5-phosphatase SAC2; AltName: Full=Protein SUPPRESSOR OF ACTIN 2; AltName: Full=SAC domain protein 2)
miR171c-5p	TRINITY_DN85985_c0_g6	2.5	1	21	39	59	GGATATTGGTGCGGTTCAATC	|*||||:||||||||||*||*	CGTATAGCCACGCCAAGGTAC								PF01151.15(ELO:GNS1/SUR4 family)	GO:0016020(cellular_component:membrane)	gi|902206326|gb|KNA15430.1|( hypothetical protein SOVF_098340 [Spinacia oleracea])	gi|75213501|sp|Q9SYY4.1|ELO3L_ARATH(RecName: Full=Elongation of fatty acids protein 3-like; Short=Protein ELO3-like; AltName: Full=Protein HIGH EXPRESSION OF OSMOTICALLY RESPONSIVE GENES 3; AltName: Full=Very long-chain fatty acid condensing enzyme HOS3; Short=VLCFA condensing enzyme HOS3)
miR171c-5p	TRINITY_DN86352_c1_g4	2.5	1	21	3548	3569	GGATATTGGTGCGGTTCA-ATC	|||||||||||*:|||||**||	CCTATAACCACCTCAAGTCAAG								PF13966.3(zf-RVT:zinc-binding in reverse transcriptase); PF14111.3(DUF4283:Domain of unknown function (DUF4283)); PF14392.3(zf-CCHC_4:Zinc knuckle); PF00078.24(RVT_1:Reverse transcriptase (RNA-dependent DNA polymerase))		gi|731346747|ref|XP_010684619.1|( PREDICTED: uncharacterized protein LOC104899180 [Beta vulgaris subsp. vulgaris])	gi|74705367|sp|O00370.1|LORF2_HUMAN(RecName: Full=LINE-1 retrotransposable element ORF2 protein; Short=ORF2p; Includes: RecName: Full=Reverse transcriptase; Includes: RecName: Full=Endonuclease)
miR171c-5p	TRINITY_DN86516_c0_g1	2.5	1	21	931	951	GGATATTGGTGCGGTTCAATC	*|||||||:||||:||||*|*	ACTATAACTACGCTAAGTCAT		NOG14767(R:General function prediction only )		NOG14767(phosphatase domain containing, paladin 1)				PF14566.3(PTPlike_phytase:Inositol hexakisphosphate)		gi|731336878|ref|XP_010679493.1|( PREDICTED: paladin isoform X1 [Beta vulgaris subsp. vulgaris])	gi|146325028|sp|Q9ULE6.3|PALD_HUMAN(RecName: Full=Paladin)
miR171c-5p	TRINITY_DN86810_c2_g2	2.5	1	21	302	323	GGATATTGGTGCGGTTCA-ATC	||||||||||:|||:|||***|	CCTATAACCATGCCGAGTCCCG										gi|168068130|ref|XP_001785944.1|( predicted protein [Physcomitrella patens])	_
miR171c-5p	TRINITY_DN91349_c2_g3	2.5	1	21	808	827	GGATATTGGTGCGGTTCAATC	*|||||*||||||||||*|*|	ACTATACCCACGCCAAG-TCG					K01611	speD, AMD1	map00270(Cysteine and methionine metabolism); map00330(Arginine and proline metabolism)	PF01536.13(SAM_decarbox:Adenosylmethionine decarboxylase); PF08132.8(AdoMetDC_leader:S-adenosyl-l-methionine decarboxylase leader peptide)	GO:0006557(biological_process:S-adenosylmethioninamine biosynthetic process); GO:0006597(biological_process:spermine biosynthetic process); GO:0004014(molecular_function:adenosylmethionine decarboxylase activity); GO:0008295(biological_process:spermidine biosynthetic process)	gi|3913413|sp|Q39676.1|DCAM1_DIACA(DCAM1_DIACA RecName: Full=S-adenosylmethionine decarboxylase proenzyme 1; Short=AdoMetDC 1; Short=SAMDC 1; Contains: RecName: Full=S-adenosylmethionine decarboxylase 1 alpha chain; Contains: RecName: Full=S-adenosylmethionine decarboxylase 1 beta chain; Flags: Precursor)	gi|3913413|sp|Q39676.1|DCAM1_DIACA(RecName: Full=S-adenosylmethionine decarboxylase proenzyme 1; Short=AdoMetDC 1; Short=SAMDC 1; Contains: RecName: Full=S-adenosylmethionine decarboxylase 1 alpha chain; Contains: RecName: Full=S-adenosylmethionine decarboxylase 1 beta chain; Flags: Precursor)
miR395c	TRINITY_DN81959_c0_g1	2.5	1	21	1006	1025	CTGAAGTGTTTGGGGGGACTC	|:||||*|||||||||*||||	GGCTTCTCAAACCCCC-TGAG										gi|1021026567|gb|KZM84354.1|( hypothetical protein DCAR_028352 [Daucus carota subsp. sativus])	gi|44888115|sp|P93295.1|M310_ARATH(RecName: Full=Uncharacterized mitochondrial protein AtMg00310; AltName: Full=ORF154)
miR395c	TRINITY_DN83438_c0_g1	2.5	1	21	1448	1469	CTGAAGTGTTTGGGGGGAC-TC	*|||||||:||||:|||||**|	AACTTCACGAACCTCCCTGTTG								PF00743.16(FMO-like:Flavin-binding monooxygenase-like); PF13738.3(Pyr_redox_3:Pyridine nucleotide-disulphide oxidoreductase); PF07992.11(Pyr_redox_2:Pyridine nucleotide-disulphide oxidoreductase); PF01266.21(DAO:FAD dependent oxidoreductase); PF13450.3(NAD_binding_8:NAD(P)-binding Rossmann-like domain); PF13434.3(K_oxygenase:L-lysine 6-monooxygenase (NADPH-requiring)); PF12831.4(FAD_oxidored:FAD …	GO:0050660(molecular_function:flavin adenine dinucleotide binding); GO:0016020(cellular_component:membrane); GO:0004499(molecular_function:N,N-dimethylaniline monooxygenase activity); GO:0055114(biological_process:oxidation-reduction process); GO:0050661(molecular_function:NADP binding)	gi|731330502|ref|XP_010676166.1|( PREDICTED: flavin-containing monooxygenase FMO GS-OX-like 4 [Beta vulgaris subsp. vulgaris])	gi|313118270|sp|Q9C8U0.2|GSXL5_ARATH(RecName: Full=Flavin-containing monooxygenase FMO GS-OX-like 5; AltName: Full=Flavin-monooxygenase glucosinolate S-oxygenase-like 5)
miR395c	TRINITY_DN83814_c0_g1	2.5	1	21	241	261	CTGAAGTGTTTGGGGGGACTC	*||||||||||:|||:||*|*	AACTTCACAAATCCCTCTTAC								PF14226.3(DIOX_N:non-haem dioxygenase in morphine synthesis N-terminal); PF03171.17(2OG-FeII_Oxy:2OG-Fe(II) oxygenase superfamily)	GO:0046872(molecular_function:metal ion binding)	gi|870853151|gb|KMT05032.1|( hypothetical protein BVRB_7g171920 [Beta vulgaris subsp. vulgaris])	gi|259016235|sp|O49561.2|G2OX8_ARATH(RecName: Full=Gibberellin 2-beta-dioxygenase 8; AltName: Full=GA 2-oxidase 8; AltName: Full=Gibberellin 2-beta-hydroxylase 8; AltName: Full=Gibberellin 2-oxidase 8)
miR395c	TRINITY_DN86069_c0_g1	2.5	1	21	2192	2213	CTGAAGTGTTTGGGGGGAC-TC	||||||||||||::||:||*|*	GACTTCACAAACTTCCTTGCAT					K11270	CTF8		PF09696.7(Ctf8:Ctf8); PF00646.30(F-box:F-box domain); PF12937.4(F-box-like:F-box-like)		gi|902235438|gb|KNA23908.1|( hypothetical protein SOVF_019520 [Spinacia oleracea])	gi|75263264|sp|Q9FZE7.1|FB41_ARATH(RecName: Full=Putative F-box protein At1g47702)
miR395c	TRINITY_DN87608_c1_g6	2.5	1	21	202	222	CTGAAGTGTTTGGGGGGACTC	||||||:|||||:|:::||||	GACTTCGCAAACTCTTTTGAG					K03403	chlH, bchH	map00860(Porphyrin and chlorophyll metabolism)	PF02514.13(CobN-Mg_chel:CobN/Magnesium Chelatase)	GO:0016851(molecular_function:magnesium chelatase activity); GO:0015995(biological_process:chlorophyll biosynthetic process)	gi|222424848|dbj|BAH20376.1|( AT5G13630 [Arabidopsis thaliana])	gi|75171815|sp|Q9FNB0.1|CHLH_ARATH(RecName: Full=Magnesium-chelatase subunit ChlH, chloroplastic; Short=Mg-chelatase subunit H; AltName: Full=ABA-binding protein; AltName: Full=Mg-protoporphyrin IX chelatase subunit ChlH; AltName: Full=Protein CONDITIONAL CHLORINA; AltName: Full=Protein GENOMES UNCOUPLED 5; AltName: Full=Protein RAPID TRANSPIRATION IN DETACHED LEAVES 1; Flags: Precursor)
miR395c	TRINITY_DN90454_c0_g1	2.5	1	21	219	238	CTGAAGTGTTTGGGGGGACTC	*|:|||||||||:||||**||	CATTTCACAAACTCCCC-AAG		NOG63094(S:Function unknown )		NOG63094()					GO:0016021(cellular_component:integral component of membrane)	gi|902221762|gb|KNA18997.1|( hypothetical protein SOVF_065560 [Spinacia oleracea])	_
miR395c	TRINITY_DN93134_c2_g3	2.5	1	21	1380	1400	CTGAAGTGTTTGGGGGGACTC	||:|*||||||||||:||*||	GATTCCACAAACCCCTCTAAG										gi|310753563|gb|ADP20178.1|( gag-pol polyprotein [Silene latifolia])	_
miR396g-5p	TRINITY_DN128923_c0_g1	2.5	1	21	480	499	TTCCACGGCTTTCTTGAACTT	||||||:||||:||:||*|*|	AAGGTGTCGAAGGAGCT-GTA		NOG00394(R:General function prediction only )		NOG00394(Short-chain dehydrogenase reductase Sdr)	K18337	LRA1	map00051(Fructose and mannose metabolism)	PF13561.3(adh_short_C2:Enoyl-(Acyl carrier protein) reductase); PF00106.22(adh_short:short chain dehydrogenase)		gi|552845427|ref|XP_005851347.1|( hypothetical protein CHLNCDRAFT_50121 [Chlorella variabilis])	gi|550540939|sp|A3LZU7.2|RM1DH_PICST(RecName: Full=L-rhamnose-1-dehydrogenase)
miR396g-5p	TRINITY_DN133306_c0_g1	2.5	1	21	171	191	TTCCACGGCTTTCTTGAACTT	|||*|||||*||||||||||*	AAGTTGCCGCAAGAACTTGAC								PF00515.25(TPR_1:Tetratricopeptide repeat); PF07719.14(TPR_2:Tetratricopeptide repeat); PF13414.3(TPR_11:TPR repeat); PF13181.3(TPR_8:Tetratricopeptide repeat); PF13428.3(TPR_14:Tetratricopeptide repeat); PF13371.3(TPR_9:Tetratricopeptide repeat); PF13431.3(TPR_17:Tetratricopeptide repeat); PF13432.3(TPR_16:Tetratricopeptide repeat); PF13176.3(TPR_7:Tetratricopeptide repeat); PF13174.3(TPR_6:Tetr…		gi|168028284|ref|XP_001766658.1|( predicted protein [Physcomitrella patens])	gi|26401564|sp|O36033.2|YLM1_SCHPO(RecName: Full=TPR repeat-containing protein C19B12.01)
miR396g-5p	TRINITY_DN89128_c0_g1	2.5	1	21	1491	1511	TTCCACGGCTTTCTTGAACTT	*||||||||:|||:||||*::	CAGGTGCCGGAAGGACTTCGG		NOG13146(O:Posttranslational modification, protein turnover, chaperones )		NOG13146(Mitochondrial E3 ubiquitin protein ligase 1)	K15688	MUL1		PF12483.5(GIDE:E3 Ubiquitin ligase); PF13920.3(zf-C3HC4_3:Zinc finger, C3HC4 type (RING finger)); PF14447.3(Prok-RING_4:Prokaryotic RING finger family 4)	GO:0007005(biological_process:mitochondrion organization); GO:0004842(molecular_function:ubiquitin-protein transferase activity); GO:0016567(biological_process:protein ubiquitination); GO:0016021(cellular_component:integral component of membrane); GO:0008270(molecular_function:zinc ion binding)	gi|731346185|ref|XP_010684325.1|( PREDICTED: mitochondrial ubiquitin ligase activator of NFKB 1 isoform X1 [Beta vulgaris subsp. vulgaris])	gi|75329773|sp|Q8L7N4.1|SP1_ARATH(RecName: Full=E3 ubiquitin-protein ligase SP1; AltName: Full=DIAP1-like protein 1; AltName: Full=Protein SUPPRESSOR OF PPI1 LOCUS 1)
miR396g-5p	TRINITY_DN89207_c0_g2	2.5	1	21	1124	1143	TTCCACGGCTTTCTTGAACTT	|||||||:|||||:||*|*||	AAGGTGCTGAAAGGACGT-AA								PF07876.9(Dabb:Stress responsive A/B Barrel Domain)		gi|902197525|gb|KNA13452.1|( hypothetical protein SOVF_116730 [Spinacia oleracea])	_
miR396g-5p	TRINITY_DN90522_c1_g3	2.5	1	21	2624	2644	TTCCACGGCTTTCTTGAACTT	||||||*||||||||*|*|||	AAGGTGACGAAAGAAGTAGAA					K14794	RRP12		PF08161.9(NUC173:NUC173 domain); PF14500.3(MMS19_N:Dos2-interacting transcription regulator of RNA-Pol-II); PF16201.2(NopRA1:Nucleolar pre-ribosomal-associated protein 1)		gi|731352400|ref|XP_010687530.1|( PREDICTED: RRP12-like protein [Beta vulgaris subsp. vulgaris])	gi|71153786|sp|Q5ZKD5.1|RRP12_CHICK(RecName: Full=RRP12-like protein)
miR166e-5p	TRINITY_DN48112_c0_g2	2.5	1	21	590	611	GGAATGTTGGCTGGCTCGA-GG	|:||||:||||*|||||||*||	CTTTACGACCGCCCGAGCTGCC								PF05598.8(DUF772:Transposase domain (DUF772)); PF01609.18(DDE_Tnp_1:Transposase DDE domain)		gi|223511279|gb|EEF23753.1|( conserved hypothetical protein, partial [Ricinus communis])	_
miR166e-5p	TRINITY_DN87723_c11_g2	2.5	1	21	486	506	GGAATGTTGGCTGGCTCGAGG	||||*||||||::|||||||*	CCTTCCAACCGGTCGAGCTCA	COG0278(O:Posttranslational modification, protein turnover, chaperones )		COG0278(Glutaredoxin)		K07390	grxD, GLRX5		PF00462.21(Glutaredoxin:Glutaredoxin)	GO:0005623(cellular_component:cell); GO:0045454(biological_process:cell redox homeostasis); GO:0009055(molecular_function:electron carrier activity); GO:0015035(molecular_function:protein disulfide oxidoreductase activity); GO:0055114(biological_process:oxidation-reduction process)	gi|902235554|gb|KNA23970.1|( hypothetical protein SOVF_020410 [Spinacia oleracea])	gi|119370632|sp|Q84Y95.2|GRS14_ARATH(RecName: Full=Monothiol glutaredoxin-S14, chloroplastic; Short=AtGRXcp; Short=AtGrxS14; AltName: Full=CAX-interacting protein 1; Short=CXIP1; Flags: Precursor)
miR166e-5p	TRINITY_DN87809_c0_g7	2.5	1	21	92	112	GGAATGTTGGCTGGCTCGAGG	|||*||:|:||||||||||::	CCTCACGATCGACCGAGCTTT		NOG05667(R:General function prediction only )		NOG05667(WD repeatcontaining protein)	K15361	WDR48, UAF1		PF11816.5(DUF3337:Domain of unknown function (DUF3337)); PF00400.29(WD40:WD domain, G-beta repeat); PF16207.2(RAWUL:RAWUL domain RING finger- and WD40-associated ubiquitin-like)		gi|731328204|ref|XP_010674919.1|( PREDICTED: WD repeat-containing protein 48 [Beta vulgaris subsp. vulgaris])	gi|82231191|sp|Q5F3K4.1|WDR48_CHICK(RecName: Full=WD repeat-containing protein 48; AltName: Full=USP1-associated factor 1)
miR398a-3p	TRINITY_DN87876_c5_g2	2.5	1	21	878	898	TGTGTTCTCAGGTCACCCCTT	|||||||||*::|||||*|||	ACACAAGAGGTTAGTGGAGAA								PF13894.3(zf-C2H2_4:C2H2-type zinc finger); PF00096.23(zf-C2H2:Zinc finger, C2H2 type)	GO:0003676(molecular_function:nucleic acid binding); GO:0046872(molecular_function:metal ion binding)	gi|848851689|ref|XP_012836955.1|( PREDICTED: zinc finger protein WIP2-like [Erythranthe guttata])	gi|75337752|sp|Q9SVY1.1|ZWIP2_ARATH(RecName: Full=Zinc finger protein WIP2; AltName: Full=Protein NO TRANSMITTING TRACT; AltName: Full=WIP-domain protein 2; Short=AtWIP2)
miR319a-3p.2-3p	TRINITY_DN74218_c0_g1	2.5	1	20	37	56	TTGGACTGAAGGGTGCTCCC	*||:|||||||:|||||*|*	TACTTGACTTCTCACGACGA										gi|848877991|ref|XP_012839427.1|( PREDICTED: LOB domain-containing protein 27 [Erythranthe guttata])	_
miR319a-3p.2-3p	TRINITY_DN86508_c0_g1	2.5	1	20	1092	1112	TTGGACTGAAGGGTGCTCC-C	|||||*||||||*||||||*|	AACCTTACTTCCGACGAGGTG								PF03080.12(DUF239:Domain of unknown function (DUF239)); PF14365.3(DUF4409:Domain of unknown function (DUF4409))		gi|703101108|ref|XP_010097100.1|( hypothetical protein L484_019539 [Morus notabilis])	_
miR319a-3p.2-3p	TRINITY_DN87510_c0_g1	2.5	1	20	115	134	TTGGACTGAAGGGTGCTCCC	|*||||||||||||||:*|*	ATCCTGACTTCCCACGGAGC					K00613	GATM	map00330(Arginine and proline metabolism); map00260(Glycine, serine and threonine metabolism)				gi|1730203|sp|P50442.1|GATM_RAT(RecName: Full=Glycine amidinotransferase, mitochondrial; AltName: Full=L-arginine:glycine amidinotransferase; AltName: Full=Transamidinase; Flags: Precursor)
miR319a-3p.2-3p	TRINITY_DN89557_c1_g5	2.5	1	20	948	967	TTGGACTGAAGGGTGCTCCC	|||||*|||||||*|||||*	AACCTCACTTCCCTCGAGGT					K09422	MYBP		PF00249.28(Myb_DNA-binding:Myb-like DNA-binding domain); PF13921.3(Myb_DNA-bind_6:Myb-like DNA-binding domain)		gi|731326066|ref|XP_010673830.1|( PREDICTED: transcription factor GAMYB-like [Beta vulgaris subsp. vulgaris])	gi|158512823|sp|A2WW87.1|GAM1_ORYSI(RecName: Full=Transcription factor GAMYB; AltName: Full=OsGAMyb)
miR395a	TRINITY_DN83966_c0_g1	2.5	1	21	1045	1065	GTGAAGTGCTTGGGGGAACTC	*|||||||*||||:||||*||	AACTTCACAAACCTCCTTTAG								PF13515.3(FUSC_2:Fusaric acid resistance protein-like); PF04632.9(FUSC:Fusaric acid resistance protein family)	GO:0016020(cellular_component:membrane)	gi|731349064|ref|XP_010685806.1|( PREDICTED: uncharacterized protein LOC104900148 [Beta vulgaris subsp. vulgaris])	_
miR395a	TRINITY_DN89812_c1_g5	2.5	1	21	1980	1999	GTGAAGTGCTTGGGGGAACTC	|||||||:||||::||||*|*	CACTTCATGAACTTCCTT-AT								PF13650.3(Asp_protease_2:Aspartyl protease); PF13975.3(gag-asp_proteas:gag-polyprotein putative aspartyl protease)		gi|923695612|ref|XP_013658015.1|( PREDICTED: uncharacterized protein LOC106362703 [Brassica napus])	gi|130405|sp|P04323.1|POL3_DROME(RecName: Full=Retrovirus-related Pol polyprotein from transposon 17.6; Includes: RecName: Full=Protease; Includes: RecName: Full=Reverse transcriptase; Includes: RecName: Full=Endonuclease)
miR395a	TRINITY_DN91578_c0_g2	2.5	1	21	1154	1173	GTGAAGTGCTTGGGGGAACTC	||||||:||||||:|:||*|*	CACTTCGCGAACCTCTTT-AT									GO:0005524(molecular_function:ATP binding); GO:0016787(molecular_function:hydrolase activity)	gi|731321857|ref|XP_010671575.1|( PREDICTED: uncharacterized protein LOC104888335 [Beta vulgaris subsp. vulgaris])	_
miR395a	TRINITY_DN91578_c0_g5	2.5	1	21	599	618	GTGAAGTGCTTGGGGGAACTC	||:||||||||||:|:||*|*	CATTTCACGAACCTCTTT-AT									GO:0005524(molecular_function:ATP binding); GO:0016787(molecular_function:hydrolase activity)	gi|731321857|ref|XP_010671575.1|( PREDICTED: uncharacterized protein LOC104888335 [Beta vulgaris subsp. vulgaris])	_
miR160h	TRINITY_DN89832_c1_g4	2.5	1	21	2865	2885	TGCCTGGCTCCCTGCATGCCA	*|||||**|||||||||||||	TCGGACGTAGGGACGTACGGT	COG5108(K:Transcription )		COG5108(DNA-dependent RNA polymerase catalyzes the transcription of DNA into RNA using the four ribonucleoside triphosphates as substrates (By similarity))		K10908	POLRMT, RPO41		PF00940.16(RNA_pol:DNA-dependent RNA polymerase); PF14700.3(RPOL_N:DNA-directed RNA polymerase N-terminal)	GO:0003899(molecular_function:DNA-directed RNA polymerase activity); GO:0003677(molecular_function:DNA binding); GO:0006351(biological_process:transcription, DNA-templated); GO:0005739(cellular_component:mitochondrion)	gi|62750825|emb|CAC80139.1|( DNA-dependent RNA polymerase [Spinacia oleracea])	gi|3914826|sp|O24600.1|RPOT3_ARATH(RecName: Full=DNA-directed RNA polymerase 3, chloroplastic; Flags: Precursor)
miR160h	TRINITY_DN92423_c0_g1	2.5	1	21	88	108	TGCCTGGCTCCCTGCATGCCA	|||*|||||||||||||***|	ACGAACCGAGGGACGTAACAT								PF03893.13(Lipase3_N:Lipase 3 N-terminal region); PF01764.22(Lipase_3:Lipase (class 3))	GO:0016042(biological_process:lipid catabolic process); GO:0016787(molecular_function:hydrolase activity)	gi|902238873|gb|KNA25359.1|( hypothetical protein SOVF_007260 [Spinacia oleracea])	gi|259016351|sp|Q9P979.3|FAEA_ASPAW(RecName: Full=Feruloyl esterase A; AltName: Full=Ferulic acid esterase A; Short=FAEA; AltName: Full=Feruloylesterase; Flags: Precursor)
miR169w	TRINITY_DN88802_c2_g1	2.5	1	21	1896	1916	TAGCCAAGGATGACTTGCCCA	*||||||||||||*|||||**	TTCGGTTCCTACTCAACGGAC					K08064	NFYA		PF10253.6(PRCC:Mitotic checkpoint regulator, MAD2B-interacting); PF02045.12(CBFB_NFYA:CCAAT-binding transcription factor (CBF-B/NF-YA) subunit B)		gi|902218597|gb|KNA18080.1|( hypothetical protein SOVF_074230 [Spinacia oleracea])	gi|81174954|sp|Q93ZH2.2|NFYA3_ARATH(RecName: Full=Nuclear transcription factor Y subunit A-3; Short=AtNF-YA-3; AltName: Full=Transcriptional activator HAP2C)
miR397b	TRINITY_DN85773_c1_g1	2.5	1	21	1756	1775	CCATTGAGTGCAGCGTTGATG	*||||||||*||||||||*::	CGTAACTCAAGTCGCAAC-GT								PF10373.6(EST1_DNA_bind:Est1 DNA/RNA binding domain); PF10374.6(EST1:Telomerase activating protein Est1)		gi|902193676|gb|KNA12353.1|( hypothetical protein SOVF_126470 [Spinacia oleracea])	gi|75173389|sp|Q9FZ99.1|SMG7L_ARATH(RecName: Full=Protein SMG7L; AltName: Full=Protetin SMG7-like)
miR1863b	TRINITY_DN89098_c1_g5	2.5	1	24	3	26	AGCTCTGATACCATGTTAACTGTT	*||||||||||*|||||||*|::|	CCGAGACTATGCTACAATTTATGA					K00083	E1.1.1.195	map00940(Phenylpropanoid biosynthesis)	PF08240.9(ADH_N:Alcohol dehydrogenase GroES-like domain)	GO:0046029(molecular_function:mannitol dehydrogenase activity); GO:0055114(biological_process:oxidation-reduction process); GO:0008270(molecular_function:zinc ion binding)	gi|731338518|ref|XP_010680373.1|( PREDICTED: probable mannitol dehydrogenase [Beta vulgaris subsp. vulgaris])	gi|10720090|sp|P93257.1|MTDH_MESCR(RecName: Full=Probable mannitol dehydrogenase; AltName: Full=NAD-dependent mannitol dehydrogenase)
miR319b-5p	TRINITY_DN85259_c1_g1	2.5	1	21	1108	1127	GAGCTTTCTTTAGTCCACTCA	||:|||||||||:|*|||*||	CTTGAAAGAAATTAAGTG-GT								PF12906.4(RINGv:RING-variant domain); PF13639.3(zf-RING_2:Ring finger domain)		gi|731345805|ref|XP_010684110.1|( PREDICTED: uncharacterized protein LOC104898704 [Beta vulgaris subsp. vulgaris])	gi|519889692|sp|F4JKK0.1|SUD1_ARATH(RecName: Full=Probable E3 ubiquitin ligase SUD1; AltName: Full=Protein ECERIFERUM 9; AltName: Full=Protein SUPPRESSOR OF DRY2 DEFFECTS 1; Short=AtSUD1; AltName: Full=RING/U-box domain-containing protein)
miR319b-5p	TRINITY_DN86858_c0_g3	2.5	1	21	97	117	GAGCTTTCTTTAGTCCACTCA	:|:*|||||||||||||*:||	TTTAAAAGAAATCAGGTCGGT								PF12799.4(LRR_4:Leucine Rich repeats (2 copies)); PF13855.3(LRR_8:Leucine rich repeat)		gi|870844645|gb|KMS97566.1|( hypothetical protein BVRB_5g125900 [Beta vulgaris subsp. vulgaris])	gi|857337843|sp|F4J339.1|RPP1_ARATH(RecName: Full=Probable disease resistance protein RPP1; AltName: Full=Protein RECOGNITION OF PERONOSPORA PARASITICA 1)
miR319b-5p	TRINITY_DN88429_c0_g3	2.5	1	21	2025	2044	GAGCTTTCTTTAGTCCACTCA	*|||||||||||:*||||*||	ATCGAAAGAAATTCGGTG-GT					K17398	DNMT3A	map00270(Cysteine and methionine metabolism)	PF00855.14(PWWP:PWWP domain)		gi|731327830|ref|XP_010674726.1|( PREDICTED: uncharacterized protein LOC104890824 [Beta vulgaris subsp. vulgaris])	gi|81910040|sp|Q5RKH0.1|GLYR1_RAT(RecName: Full=Putative oxidoreductase GLYR1; AltName: Full=Glyoxylate reductase 1 homolog; AltName: Full=Nuclear protein NP60)
miR319b-5p	TRINITY_DN90790_c1_g1	2.5	1	21	764	784	GAGCTTTCTTTAGTCCACTCA	*||||||||||*|:|||*|||	ATCGAAAGAAAACGGGTTAGT					K03544	clpX, CLPX		PF10431.6(ClpB_D2-small:C-terminal, D2-small domain, of ClpB protein)	GO:0006457(biological_process:protein folding); GO:0005524(molecular_function:ATP binding); GO:0051082(molecular_function:unfolded protein binding)	gi|901821620|gb|KMZ73471.1|( putative ATP-dependent clp protease ATP-binding subunit clpx [Zostera marina])	gi|939319591|sp|F4K7F6.1|CLPX2_ARATH(RecName: Full=CLP protease regulatory subunit CLPX2, mitochondrial; Flags: Precursor)
miR319b-5p	TRINITY_DN91356_c2_g1	2.5	1	21	802	821	GAGCTTTCTTTAGTCCACTCA	*|||||:|||||||||*|||*	GTCGAAGGAAATCAGG-GAGC								PF01743.17(PolyA_pol:Poly A polymerase head domain)	GO:0016779(molecular_function:nucleotidyltransferase activity); GO:0003723(molecular_function:RNA binding); GO:0006396(biological_process:RNA processing)	gi|870869353|gb|KMT20098.1|( hypothetical protein BVRB_1g001170 [Beta vulgaris subsp. vulgaris])	gi|74665823|sp|Q9Y7U9.1|CCA2_SCHPO(RecName: Full=Putative CCA tRNA nucleotidyltransferase 2; AltName: Full=CCA-adding enzyme 2; AltName: Full=tRNA CCA-pyrophosphorylase 2; AltName: Full=tRNA adenylyltransferase 2; AltName: Full=tRNA nucleotidyltransferase 2)
miR395k	TRINITY_DN81959_c0_g1	2.5	1	21	1006	1025	GTGAAGTGTTTGGGGGAACTC	*:||||*||||||||||*|||	GGCTTCTCAAACCCCCT-GAG										gi|1021026567|gb|KZM84354.1|( hypothetical protein DCAR_028352 [Daucus carota subsp. sativus])	gi|44888115|sp|P93295.1|M310_ARATH(RecName: Full=Uncharacterized mitochondrial protein AtMg00310; AltName: Full=ORF154)
miR395k	TRINITY_DN86069_c0_g1	2.5	1	21	2192	2213	GTGAAGTGTTTGGGGGAAC-TC	*|||||||||||::|||||*|*	GACTTCACAAACTTCCTTGCAT					K11270	CTF8		PF09696.7(Ctf8:Ctf8); PF00646.30(F-box:F-box domain); PF12937.4(F-box-like:F-box-like)		gi|902235438|gb|KNA23908.1|( hypothetical protein SOVF_019520 [Spinacia oleracea])	gi|75263264|sp|Q9FZE7.1|FB41_ARATH(RecName: Full=Putative F-box protein At1g47702)
miR395k	TRINITY_DN87319_c1_g8	2.5	1	21	1892	1912	GTGAAGTGTTTGGGGGAACTC	|||||:|:|||||*||||*||	CACTTTATAAACCACCTTAAG								PF00733.18(Asn_synthase:Asparagine synthase); PF13537.3(GATase_7:Glutamine amidotransferase domain)	GO:1901605(biological_process:alpha-amino acid metabolic process)	gi|731339115|ref|XP_010680679.1|( PREDICTED: asparagine synthetase domain-containing protein 1 isoform X2 [Beta vulgaris subsp. vulgaris])	gi|81895939|sp|Q8BFS9.1|ASND1_MOUSE(RecName: Full=Asparagine synthetase domain-containing protein 1)
miR395k	TRINITY_DN87608_c1_g6	2.5	1	21	202	222	GTGAAGTGTTTGGGGGAACTC	*|||||:|||||:|::|||||	GACTTCGCAAACTCTTTTGAG					K03403	chlH, bchH	map00860(Porphyrin and chlorophyll metabolism)	PF02514.13(CobN-Mg_chel:CobN/Magnesium Chelatase)	GO:0016851(molecular_function:magnesium chelatase activity); GO:0015995(biological_process:chlorophyll biosynthetic process)	gi|222424848|dbj|BAH20376.1|( AT5G13630 [Arabidopsis thaliana])	gi|75171815|sp|Q9FNB0.1|CHLH_ARATH(RecName: Full=Magnesium-chelatase subunit ChlH, chloroplastic; Short=Mg-chelatase subunit H; AltName: Full=ABA-binding protein; AltName: Full=Mg-protoporphyrin IX chelatase subunit ChlH; AltName: Full=Protein CONDITIONAL CHLORINA; AltName: Full=Protein GENOMES UNCOUPLED 5; AltName: Full=Protein RAPID TRANSPIRATION IN DETACHED LEAVES 1; Flags: Precursor)
miR395k	TRINITY_DN91662_c2_g1	2.5	1	21	208	228	GTGAAGTGTTTGGGGGAACTC	||||||:||||||:||*||*|	CACTTCGCAAACCTCCATGTG								PF03140.12(DUF247:Plant protein of unknown function)		gi|89953439|gb|ABD83313.1|( Fgenesh protein 60 [Beta vulgaris])	gi|75203068|sp|Q9SD53.1|Y3720_ARATH(RecName: Full=UPF0481 protein At3g47200)
miR395k	TRINITY_DN93177_c1_g2	2.5	1	21	1386	1406	GTGAAGTGTTTGGGGGAACTC	||:||||||||||:|*||||*	CATTTCACAAACCTCGTTGAC					K15210	SNAPC3		PF12251.5(zf-SNAP50_C:snRNA-activating protein of 50kDa MW C terminal)		gi|870863819|gb|KMT14966.1|( hypothetical protein BVRB_3g064730 isoform B [Beta vulgaris subsp. vulgaris])	gi|75153928|sp|Q8L627.1|SRD2_ARATH(RecName: Full=snRNA-activating protein complex subunit; Short=SNAPc subunit; AltName: Full=Protein SHOOT REDIFFERENTIATION DEFECTIVE 2)
miR828b-5p	TRINITY_DN88000_c3_g1	2.5	1	22	1185	1207	TCTTGCTCAAATGAGTAT-TCCA	:|||||:||||||||:|:*|*||	GGAACGGGTTTACTCGTGGAAGT	COG0536(R:General function prediction only )		COG0536(An essential GTPase which binds GTP, GDP and possibly (p)ppGpp with moderate affinity, with high nucleotide exchange rates and a fairly low GTP hydrolysis rate (By similarity). It may play a role in control of the cell cycle, stress response, ribosome biogenesis and in those bacteria that undergo differentiation, in morphogenesis control)					PF01926.20(MMR_HSR1:50S ribosome-binding GTPase); PF01018.19(GTP1_OBG:GTP1/OBG); PF02421.15(FeoB_N:Ferrous iron transport protein B); PF00009.24(GTP_EFTU:Elongation factor Tu GTP binding domain); PF00025.18(Arf:ADP-ribosylation factor family)	GO:0003924(molecular_function:GTPase activity); GO:0000287(molecular_function:magnesium ion binding); GO:0005525(molecular_function:GTP binding)	gi|731312075|ref|XP_010672494.1|( PREDICTED: probable GTP-binding protein OBGC2 isoform X1 [Beta vulgaris subsp. vulgaris])	gi|75328337|sp|Q851Q6.1|OBGC2_ORYSJ(RecName: Full=Probable GTP-binding protein OBGC2)
miR828b-5p	TRINITY_DN92184_c1_g3	2.5	1	22	471	492	TCTTGCTCAAATGAGTATTCCA	**||||||||||*|||||||||	CAAACGAGTTTAATCATAAGGT					K09422	MYBP		PF00249.28(Myb_DNA-binding:Myb-like DNA-binding domain); PF13921.3(Myb_DNA-bind_6:Myb-like DNA-binding domain)		gi|731372121|ref|XP_010666251.1|( PREDICTED: transcription factor MYB23 [Beta vulgaris subsp. vulgaris])	gi|127585|sp|P10290.1|MYBC_MAIZE(RecName: Full=Anthocyanin regulatory C1 protein)
miR166e-3p	TRINITY_DN89630_c3_g5	2.5	1	21	332	352	TCGAACCAGGCTTCATTCCCC	|||||*|||||:|||:||*||	AGCTTTGTCCGGAGTGAGAGG								PF00665.23(rve:Integrase core domain)		gi|147779072|emb|CAN62533.1|( hypothetical protein VITISV_030700 [Vitis vinifera])	gi|130582|sp|P10978.1|POLX_TOBAC(RecName: Full=Retrovirus-related Pol polyprotein from transposon TNT 1-94; Includes: RecName: Full=Protease; Includes: RecName: Full=Reverse transcriptase; Includes: RecName: Full=Endonuclease)
miR164e	TRINITY_DN105152_c0_g1	2.5	1	21	13	33	TGGAGAAGCAGGGCACGTGAG	|:||||||||*:|||||*|||	ATCTCTTCGTGTCGTGCCCTC					K14430;K20183	VPS39, VAM6;PHO87_91		PF03600.13(CitMHS:Citrate transporter); PF00939.16(Na_sulph_symp:Sodium:sulfate symporter transmembrane region)	GO:0098656(biological_process:anion transmembrane transport); GO:0006797(biological_process:polyphosphate metabolic process); GO:0005315(molecular_function:inorganic phosphate transmembrane transporter activity); GO:0016021(cellular_component:integral component of membrane); GO:0006817(biological_process:phosphate ion transport)	gi|545369769|ref|XP_005649620.1|( hypothetical protein COCSUDRAFT_27773 [Coccomyxa subellipsoidea C-169])	gi|732208|sp|P27514.2|PHO91_YEAST(RecName: Full=Low-affinity phosphate transporter PHO91)
miR164e	TRINITY_DN84992_c0_g1	2.5	1	21	1209	1229	TGGAGAAGCAGGGCACGTGAG	*:|||||||||:|||*|||||	CTCTCTTCGTCTCGTTCACTC								PF00226.28(DnaJ:DnaJ domain)	GO:0016021(cellular_component:integral component of membrane)	gi|902226363|gb|KNA20336.1|( hypothetical protein SOVF_052980 [Spinacia oleracea])	gi|134034094|sp|Q498R3.2|DJC10_RAT(RecName: Full=DnaJ homolog subfamily C member 10; Flags: Precursor)
miR164e	TRINITY_DN86078_c0_g2	2.5	1	21	1831	1851	TGGAGAAGCAGGGCACGTGAG	||||||*||||:||||||**|	ACCTCTCCGTCTCGTGCAAGC	COG0480(J:Translation, ribosomal structure and biogenesis )		COG0480(Catalyzes the GTP-dependent ribosomal translocation step during translation elongation. During this step, the ribosome changes from the pre-translocational (PRE) to the post- translocational (POST) state as the newly formed A-site-bound peptidyl-tRNA and P-site-bound deacylated tRNA move to the P and E sites, respectively. Catalyzes the coordinated movement of the two tRNA molecules, the …		K03234	EEF2		PF00009.24(GTP_EFTU:Elongation factor Tu GTP binding domain); PF03764.15(EFG_IV:Elongation factor G, domain IV); PF00679.21(EFG_C:Elongation factor G C-terminus); PF14492.3(EFG_II:Elongation Factor G, domain II); PF03144.22(GTP_EFTU_D2:Elongation factor Tu domain 2); PF01926.20(MMR_HSR1:50S ribosome-binding GTPase)	GO:0003924(molecular_function:GTPase activity); GO:0005525(molecular_function:GTP binding)	gi|326497203|dbj|BAK02186.1|( predicted protein [Hordeum vulgare subsp. vulgare])	gi|119172|sp|P13639.4|EF2_HUMAN(RecName: Full=Elongation factor 2; Short=EF-2 >gi|88909610|sp|Q5R8Z3.3|EF2_PONAB RecName: Full=Elongation factor 2; Short=EF-2)
miR164e	TRINITY_DN87553_c0_g2	2.5	1	21	692	712	TGGAGAAGCAGGGCACGTGAG	*|||||||||||:||*|::||	TCCTCTTCGTCCTGTTCGTTC	COG0451(M:Cell wall/membrane/envelope biogenesis )		COG0451(Nad-dependent epimerase dehydratase)		K08678	UXS1, uxs	map00520(Amino sugar and nucleotide sugar metabolism)	PF16363.2(GDP_Man_Dehyd:GDP-mannose 4,6 dehydratase); PF01370.18(Epimerase:NAD dependent epimerase/dehydratase family); PF01073.16(3Beta_HSD:3-beta hydroxysteroid dehydrogenase/isomerase family); PF07993.9(NAD_binding_4:Male sterility protein); PF04321.14(RmlD_sub_bind:RmlD substrate binding domain); PF02719.12(Polysacc_synt_2:Polysaccharide biosynthesis protein)	GO:0016021(cellular_component:integral component of membrane)	gi|902211971|gb|KNA16834.1|( hypothetical protein SOVF_084960 [Spinacia oleracea])	gi|75330962|sp|Q8S8T4.1|UXS4_ARATH(RecName: Full=UDP-glucuronic acid decarboxylase 4; AltName: Full=UDP-XYL synthase 4; AltName: Full=UDP-glucuronate decarboxylase 4; Short=UGD; Short=UXS-4)
miR164e	TRINITY_DN88002_c2_g1	2.5	1	21	1384	1404	TGGAGAAGCAGGGCACGTGAG	*|:|||||||||:||*|||||	TCTTCTTCGTCCTGTACACTC	COG1024(I:Lipid transport and metabolism )		COG1024(Enoyl-CoA hydratase)		K05605	HIBCH	map00640(Propanoate metabolism); map00280(Valine, leucine and isoleucine degradation); map00410(beta-Alanine metabolism)	PF16113.2(ECH_2:Enoyl-CoA hydratase/isomerase); PF00378.17(ECH_1:Enoyl-CoA hydratase/isomerase)	GO:0003860(molecular_function:3-hydroxyisobutyryl-CoA hydrolase activity)	gi|902224219|gb|KNA19729.1|( hypothetical protein SOVF_059110 [Spinacia oleracea])	gi|292630834|sp|Q9SHJ8.2|HIBC8_ARATH(RecName: Full=3-hydroxyisobutyryl-CoA hydrolase-like protein 5)
miR164e	TRINITY_DN89422_c2_g5	2.5	1	21	1124	1144	TGGAGAAGCAGGGCACGTGAG	||:|||||||:||*||||||*	ACTTCTTCGTTCCCTGCACTA								PF03732.14(Retrotrans_gag:Retrotransposon gag protein)		gi|731340224|ref|XP_010681279.1|( PREDICTED: uncharacterized protein LOC104896263 [Beta vulgaris subsp. vulgaris])	_
miR164e	TRINITY_DN91045_c0_g5	2.5	1	21	1976	1995	TGGAGAAGCAGGGCACGTGAG	*:|||||||||||||*||*||	CTCTCTTCGTCCCGTCCA-TC					K12823	DDX5, DBP2	map03040(Spliceosome)			gi|731335710|ref|XP_010678860.1|( PREDICTED: DEAD-box ATP-dependent RNA helicase 20 [Beta vulgaris subsp. vulgaris])	gi|108861888|sp|Q8W4R3.2|RH30_ARATH(RecName: Full=DEAD-box ATP-dependent RNA helicase 30)
miR399p	TRINITY_DN86056_c1_g5	2.5	1	21	386	406	TGCCAAAGGAGAGTTGCCCTG	|||*|||:|||||||||*|*|	ACGTTTTTCTCTCAACGTGTC	COG2013(S:Function unknown )		COG2013(conserved protein)					PF01987.14(AIM24:Mitochondrial biogenesis AIM24)	GO:0016021(cellular_component:integral component of membrane)	gi|731374673|ref|XP_010667033.1|( PREDICTED: uncharacterized protein LOC104884135 [Beta vulgaris subsp. vulgaris])	_
miR399p	TRINITY_DN87914_c2_g6	2.5	1	21	332	353	TGCCAAAGGAGAGTTGCCC-TG	*|||*|||:||||||||||*||	TCGGCTTCTTCTCAACGGGTAC								PF14223.3(Retrotran_gag_2:gag-polypeptide of LTR copia-type)	GO:0005488(molecular_function:binding)	gi|731376281|ref|XP_010667514.1|( PREDICTED: uncharacterized protein LOC104884535 [Beta vulgaris subsp. vulgaris])	gi|130582|sp|P10978.1|POLX_TOBAC(RecName: Full=Retrovirus-related Pol polyprotein from transposon TNT 1-94; Includes: RecName: Full=Protease; Includes: RecName: Full=Reverse transcriptase; Includes: RecName: Full=Endonuclease)
miR399p	TRINITY_DN88898_c0_g3	2.5	1	21	2406	2426	TGCCAAAGGAGAGTTGCCCTG	*|||||||||:|:||*|||||	TCGGTTTCCTTTTAAGGGGAC	COG0457(R:General function prediction only )		COG0457(repeat-containing protein)		K15176	CTR9		PF07719.14(TPR_2:Tetratricopeptide repeat); PF00515.25(TPR_1:Tetratricopeptide repeat); PF13181.3(TPR_8:Tetratricopeptide repeat); PF13424.3(TPR_12:Tetratricopeptide repeat); PF13431.3(TPR_17:Tetratricopeptide repeat); PF13432.3(TPR_16:Tetratricopeptide repeat); PF13428.3(TPR_14:Tetratricopeptide repeat); PF14559.3(TPR_19:Tetratricopeptide repeat); PF13414.3(TPR_11:TPR repeat); PF13174.3(TPR_6:Te…	GO:0016593(cellular_component:Cdc73/Paf1 complex); GO:0045893(biological_process:positive regulation of transcription, DNA-templated); GO:0051569(biological_process:regulation of histone H3-K4 methylation); GO:0000993(molecular_function:RNA polymerase II core binding); GO:0016020(cellular_component:membrane); GO:0009910(biological_process:negative regulation of flower development)	gi|731372151|ref|XP_010666260.1|( PREDICTED: RNA polymerase-associated protein CTR9 homolog [Beta vulgaris subsp. vulgaris])	gi|817037015|sp|B5X0I6.1|VIP6_ARATH(RecName: Full=Protein CTR9 homolog; AltName: Full=Protein EARLY FLOWERING 8; AltName: Full=Protein VERNALIZATION INDEPENDENCE 6)
miR399p	TRINITY_DN92375_c4_g1	2.5	1	21	2127	2147	TGCCAAAGGAGAGTTGCCCTG	::|||||::|||||||||*|:	GTGGTTTTTTCTCAACGGAAT	COG0749(L:Replication, recombination and repair )		COG0749(DNA polymerase)		K02335	DPO1, polA	map00230(Purine metabolism); map03420(Nucleotide excision repair); map00240(Pyrimidine metabolism); map03410(Base excision repair); map03030(DNA replication); map03440(Homologous recombination)	PF00476.17(DNA_pol_A:DNA polymerase family A); PF01612.17(DNA_pol_A_exo1:3'-5' exonuclease)	GO:0006261(biological_process:DNA-dependent DNA replication); GO:0003887(molecular_function:DNA-directed DNA polymerase activity); GO:0090305(biological_process:nucleic acid phosphodiester bond hydrolysis); GO:0003677(molecular_function:DNA binding); GO:0071897(biological_process:DNA biosynthetic process); GO:0008408(molecular_function:3'-5' exonuclease activity)	gi|902217619|gb|KNA17805.1|( hypothetical protein SOVF_076250 [Spinacia oleracea])	gi|657341188|sp|F4I6M1.1|POLIA_ARATH(RecName: Full=DNA polymerase I A, chloroplastic/mitochondrial; AltName: Full=DNA polymerase PolI-like B; Short=AtPolI-like A; AltName: Full=Polymerase gamma 2; Short=POLGAMMA2; Flags: Precursor)
miR399p	TRINITY_DN92777_c2_g3	2.5	1	21	1465	1485	TGCCAAAGGAGAGTTGCCCTG	||||*|||||||:|:||*|||	ACGGGTTCCTCTTAGCGCGAC					K12412	MCM1		PF00319.15(SRF-TF:SRF-type transcription factor (DNA-binding and dimerisation domain))		gi|971579272|ref|XP_015158921.1|( PREDICTED: agamous-like MADS-box protein AGL62 [Solanum tuberosum])	gi|75313467|sp|Q9SI38.1|ANR1_ARATH(RecName: Full=MADS-box transcription factor ANR1; AltName: Full=Protein AGAMOUS-LIKE 44; AltName: Full=Protein ARABIDOPSIS NITRATE REGULATED 1)
miR399p	TRINITY_DN92788_c0_g4	2.5	1	21	2722	2742	TGCCAAAGGAGAGTTGCCCTG	*|*|||||:||||||||||*|	CCCGTTTCTTCTCAACGGGTC		NOG07820(I:Lipid transport and metabolism )		NOG07820(K05531 mannan polymerase II complex MNN10 subunit EC 2.4.1)	K08238	XXT		PF05637.9(Glyco_transf_34:galactosyl transferase GMA12/MNN10 family)	GO:0016021(cellular_component:integral component of membrane); GO:0016757(molecular_function:transferase activity, transferring glycosyl groups)	gi|731373207|ref|XP_010666578.1|( PREDICTED: xyloglucan 6-xylosyltransferase 2 [Beta vulgaris subsp. vulgaris])	gi|46576207|sp|O22775.1|XXT2_ARATH(RecName: Full=Xyloglucan 6-xylosyltransferase 2; Short=AtXT2; AltName: Full=Putative glycosyltransferase 2; Short=AtGT2)
miR171d	TRINITY_DN135657_c0_g1	2.5	1	21	422	442	AGATTGAGCCGCGCCAATATC	*|||:|||||||||||*:|:|	CCTAGCTCGGCGCGGTCGTGG					K01048	pldB	map00564(Glycerophospholipid metabolism)	PF12146.5(Hydrolase_4:Serine aminopeptidase, S33); PF12697.4(Abhydrolase_6:Alpha/beta hydrolase family); PF00561.17(Abhydrolase_1:alpha/beta hydrolase fold)		gi|1023966422|gb|KZV14814.1|( monoglyceride lipase-like [Dorcoceras hygrometricum])	gi|29839505|sp|P59588.1|PLDB_ECOL6(RecName: Full=Lysophospholipase L2; AltName: Full=Lecithinase B >gi|54041621|sp|P07000.4|PLDB_ECOLI RecName: Full=Lysophospholipase L2; AltName: Full=Lecithinase B)
miR399e	TRINITY_DN92375_c4_g1	2.5	1	21	2127	2147	CGCCAAAGGAGAGTTGCCCTC	|:|||||::|||||||||*|*	GTGGTTTTTTCTCAACGGAAT	COG0749(L:Replication, recombination and repair )		COG0749(DNA polymerase)		K02335	DPO1, polA	map00230(Purine metabolism); map03420(Nucleotide excision repair); map00240(Pyrimidine metabolism); map03410(Base excision repair); map03030(DNA replication); map03440(Homologous recombination)	PF00476.17(DNA_pol_A:DNA polymerase family A); PF01612.17(DNA_pol_A_exo1:3'-5' exonuclease)	GO:0006261(biological_process:DNA-dependent DNA replication); GO:0003887(molecular_function:DNA-directed DNA polymerase activity); GO:0090305(biological_process:nucleic acid phosphodiester bond hydrolysis); GO:0003677(molecular_function:DNA binding); GO:0071897(biological_process:DNA biosynthetic process); GO:0008408(molecular_function:3'-5' exonuclease activity)	gi|902217619|gb|KNA17805.1|( hypothetical protein SOVF_076250 [Spinacia oleracea])	gi|657341188|sp|F4I6M1.1|POLIA_ARATH(RecName: Full=DNA polymerase I A, chloroplastic/mitochondrial; AltName: Full=DNA polymerase PolI-like B; Short=AtPolI-like A; AltName: Full=Polymerase gamma 2; Short=POLGAMMA2; Flags: Precursor)
miR156a	TRINITY_DN116793_c0_g1	2.5	1	21	155	174	TGACAGAAGAGAGAGAGCACA	*||*||||||||||||||**|	TCTTTCTTCTCTCTCTCG-AT										gi|565401773|ref|XP_006366369.1|( PREDICTED: zerumbone synthase isoform X1 [Solanum tuberosum])	gi|62286565|sp|Q8GAV9.1|CPNA_COMS9(RecName: Full=Cyclopentanol dehydrogenase >gi|62286574|sp|Q937L4.1|CPNA_COMTE RecName: Full=Cyclopentanol dehydrogenase)
miR156a	TRINITY_DN72154_c0_g1	2.5	1	21	835	854	TGACAGAAGAGAGAGAGCACA	**|||||||||||||||*|*|	CGTGTCTTCTCTCTCTC-TCT		NOG16738(S:Function unknown )		NOG16738(Pentatricopeptide repeat-containing protein)				PF07939.8(DUF1685:Protein of unknown function (DUF1685))	GO:0009536(cellular_component:plastid)	gi|1002310570|ref|XP_015618644.1|( PREDICTED: uncharacterized protein LOC4351830 [Oryza sativa Japonica Group])	_
miR156a	TRINITY_DN78404_c0_g1	2.5	1	21	593	613	TGACAGAAGAGAGAGAGCACA	*|||||||*|||||:||||*|	TCTGTCTTGTCTCTTTCGTCT								PF16974.2(NAR2:High-affinity nitrate transporter accessory)	GO:0016020(cellular_component:membrane)	gi|902212412|gb|KNA16950.1|( hypothetical protein SOVF_084270 [Spinacia oleracea])	gi|75201869|sp|Q9SB67.1|NRT32_ARATH(RecName: Full=High-affinity nitrate transporter 3.2; Flags: Precursor)
miR156a	TRINITY_DN83968_c0_g1	2.5	1	21	1518	1539	TGACAGAAGAGAGAGAG-CACA	|||*|:|||||||||||*||||	ACTATTTTCTCTCTCTCAGTGT					K00913	ITPK1	map04070(Phosphatidylinositol signaling system); map00562(Inositol phosphate metabolism)	PF05770.8(Ins134_P3_kin:Inositol 1, 3, 4-trisphosphate 5/6-kinase)	GO:0052726(molecular_function:inositol-1,3,4-trisphosphate 5-kinase activity); GO:0047325(molecular_function:inositol tetrakisphosphate 1-kinase activity); GO:0005622(cellular_component:intracellular); GO:0016310(biological_process:phosphorylation); GO:0005524(molecular_function:ATP binding); GO:0000287(molecular_function:magnesium ion binding); GO:0052725(molecular_function:inositol-1,3,4-trisph…	gi|902198567|gb|KNA13708.1|( hypothetical protein SOVF_113790 [Spinacia oleracea])	gi|75148984|sp|Q84Y01.1|ITPK1_MAIZE(RecName: Full=Inositol-tetrakisphosphate 1-kinase 1; AltName: Full=Inositol 1,3,4-trisphosphate 5/6-kinase 1; Short=Inositol-triphosphate 5/6-kinase 1; Short=Ins(1,3,4)P(3) 5/6-kinase 1; AltName: Full=Low phytic acid protein 2; AltName: Full=ZmIpk)
miR156a	TRINITY_DN86436_c1_g3	2.5	1	21	1516	1535	TGACAGAAGAGAGAGAGCACA	*|||||||||||||:|:*|*|	CCTGTCTTCTCTCTTTT-TCT								PF05703.8(Auxin_canalis:Auxin canalisation); PF08458.7(PH_2:Plant pleckstrin homology-like region)		gi|731336168|ref|XP_010679111.1|( PREDICTED: uncharacterized protein LOC104894551 [Beta vulgaris subsp. vulgaris])	gi|75162491|sp|Q8W4K5.1|VAB_ARATH(RecName: Full=VAN3-binding protein; AltName: Full=Protein FORKED 1)
miR156a	TRINITY_DN86831_c4_g3	2.5	1	21	316	336	TGACAGAAGAGAGAGAGCACA	|||*||||||||||||:|**|	ACTTTCTTCTCTCTCTTGGAT								PF02365.12(NAM:No apical meristem (NAM) protein)	GO:0006355(biological_process:regulation of transcription, DNA-templated); GO:0003677(molecular_function:DNA binding); GO:0005634(cellular_component:nucleus)	gi|731327297|ref|XP_010674451.1|( PREDICTED: NAC domain-containing protein 78-like [Beta vulgaris subsp. vulgaris])	gi|75173202|sp|Q9FY82.1|NAC82_ARATH(RecName: Full=NAC domain-containing protein 82; Short=ANAC082; AltName: Full=Protein VND-INTERACTING 1)
miR156a	TRINITY_DN87578_c3_g2	2.5	1	21	2155	2174	TGACAGAAGAGAGAGAGCACA	|:|||||*|||||||||*|*|	ATTGTCTACTCTCTCTC-TTT								PF12072.5(DUF3552:Domain of unknown function (DUF3552))		gi|731315646|ref|XP_010692447.1|( PREDICTED: putative nuclear matrix constituent protein 1-like protein isoform X2 [Beta vulgaris subsp. vulgaris])	gi|817033847|sp|F4HRT5.1|CRWN1_ARATH(RecName: Full=Protein CROWDED NUCLEI 1; AltName: Full=Protein KAKU2; AltName: Full=Protein LITTLE NUCLEI 1)
miR5077	TRINITY_DN86596_c2_g2	2.5	1	19	838	856	GTTCGCGTCGGGTTCACCA	|||*||:||:|:|||||||	CAAACGTAGTCTAAGTGGT					K03257	EIF4A	map03013(RNA transport)	PF00270.26(DEAD:DEAD/DEAH box helicase); PF00271.28(Helicase_C:Helicase conserved C-terminal domain); PF14223.3(Retrotran_gag_2:gag-polypeptide of LTR copia-type); PF13961.3(DUF4219:Domain of unknown function (DUF4219)); PF04851.12(ResIII:Type III restriction enzyme, res subunit)	GO:0003676(molecular_function:nucleic acid binding); GO:0005524(molecular_function:ATP binding); GO:0004386(molecular_function:helicase activity)	gi|449458151|ref|XP_004146811.1|( PREDICTED: eukaryotic initiation factor 4A-8 [Cucumis sativus])	gi|1170511|sp|P41382.1|IF410_TOBAC(RecName: Full=Eukaryotic initiation factor 4A-10; Short=eIF-4A-10; AltName: Full=ATP-dependent RNA helicase eIF4A-10)
miR5077	TRINITY_DN89873_c1_g4	2.5	1	19	121	139	GTTCGCGTCGGGTTCACCA	||:*||||||:|||||||*	CAGCCGCAGCTCAAGTGGG					K01900	LSC2	map00020(Citrate cycle (TCA cycle)); map00640(Propanoate metabolism)	PF00549.16(Ligase_CoA:CoA-ligase)	GO:0046872(molecular_function:metal ion binding); GO:0005524(molecular_function:ATP binding); GO:0006099(biological_process:tricarboxylic acid cycle); GO:0004775(molecular_function:succinate-CoA ligase (ADP-forming) activity); GO:0005739(cellular_component:mitochondrion)	gi|226510248|ref|NP_001150653.1|( succinyl-CoA ligase beta-chain [Zea mays])	gi|21264057|sp|Q9P567.1|SUCB_NEUCR(RecName: Full=Probable succinyl-CoA ligase [GDP-forming] subunit beta, mitochondrial; AltName: Full=Succinyl-CoA synthetase beta chain; Short=SCS-beta; Flags: Precursor)
miR319d-5p	TRINITY_DN87840_c4_g2	2.5	1	21	1703	1722	AGAGCTCTCTTCAGTCCACTC	|||*||||||*||||||||*|	TCTAGAGAGACGTCAGGTG-G	COG1485(R:General function prediction only )		COG1485(AFG1 family ATPase)		K18798	AFG1, LACE1		PF03969.13(AFG1_ATPase:AFG1-like ATPase)	GO:0005524(molecular_function:ATP binding)	gi|731352692|ref|XP_010687669.1|( PREDICTED: lactation elevated protein 1 isoform X1 [Beta vulgaris subsp. vulgaris])	gi|123780975|sp|Q3V384.1|LACE1_MOUSE(RecName: Full=Lactation elevated protein 1)
miR319d-5p	TRINITY_DN90720_c6_g2	2.5	1	21	553	573	AGAGCTCTCTTCAGTCCACTC	|||||||||||||::|**|||	TCTCGAGAGAAGTTGGACGAG									GO:0016021(cellular_component:integral component of membrane)	gi|669030174|emb|CDM84611.1|( unnamed protein product [Triticum aestivum])	_
miR172h-5p	TRINITY_DN83482_c0_g3	2.5	1	21	783	802	GGAGCACCATCAAGATTCACA	|:|:|||*||||||||||*||	CTTTGTGATAGTTCTAAG-GT		NOG04982(A:RNA processing and modification )		NOG04982(Nuclear cap binding protein subunit 1, 80kDa)	K12882	NCBP1, CBP80	map03013(RNA transport); map03015(mRNA surveillance pathway); map03040(Spliceosome)	PF09088.8(MIF4G_like:MIF4G like); PF09090.8(MIF4G_like_2:MIF4G like); PF02854.16(MIF4G:MIF4G domain)	GO:0000394(biological_process:RNA splicing, via endonucleolytic cleavage and ligation); GO:0051028(biological_process:mRNA transport); GO:0031053(biological_process:primary miRNA processing); GO:0045292(biological_process:mRNA cis splicing, via spliceosome); GO:0005846(cellular_component:nuclear cap binding complex); GO:0009737(biological_process:response to abscisic acid); GO:0000339(molecular_f…	gi|731319603|ref|XP_010670358.1|( PREDICTED: nuclear cap-binding protein subunit 1 [Beta vulgaris subsp. vulgaris])	gi|75206169|sp|Q9SIU2.2|NCBP1_ARATH(RecName: Full=Nuclear cap-binding protein subunit 1; AltName: Full=80 kDa nuclear cap-binding protein; Short=AtCBP80; Short=NCBP 80 kDa subunit; AltName: Full=Abscisic acid-hypersensitive protein 1; Short=ABA-hypersensitive protein 1; AltName: Full=Protein ENSALADA)
miR172h-5p	TRINITY_DN91594_c1_g5	2.5	1	21	255	274	GGAGCACCATCAAGATTCACA	*||:|||||:|||||||*|*|	ACTTGTGGTGGTTCTAA-TCT					K10398	KIF11, EG5		PF00225.20(Kinesin:Kinesin motor domain)	GO:0008017(molecular_function:microtubule binding); GO:0007018(biological_process:microtubule-based movement); GO:0005524(molecular_function:ATP binding); GO:0003777(molecular_function:microtubule motor activity); GO:0005874(cellular_component:microtubule)	gi|731320779|ref|XP_010670994.1|( PREDICTED: kinesin-like protein KIF3A [Beta vulgaris subsp. vulgaris])	gi|75151463|sp|Q8GYM3.1|AUG4_ARATH(RecName: Full=AUGMIN subunit 4)
miR167h-5p	TRINITY_DN102824_c0_g1	2.5	1	21	250	269	TGAAGCTGCCAACATGATCTG	*|||||:||||||*|||*|||	TCTTCGGCGGTTGCACT-GAC	COG1278(K:Transcription )		COG1278(Cold shock protein)		K09276	YBX1, NSEP1		PF00313.19(CSD:'Cold-shock' DNA-binding domain)		gi|1024055183|gb|KZV53339.1|( hypothetical protein F511_06481 [Dorcoceras hygrometricum])	gi|1175568|sp|P41824.1|YBOXH_APLCA(RecName: Full=Y-box factor homolog; AltName: Full=APY1)
miR167h-5p	TRINITY_DN116383_c0_g1	2.5	1	21	211	231	TGAAGCTGCCAACATGATCTG	|||*:|:||||||||||||*|	ACTCTGGCGGTTGTACTAGTC					K00058	serA, PHGDH	map00260(Glycine, serine and threonine metabolism)	PF02826.16(2-Hacid_dh_C:D-isomer specific 2-hydroxyacid dehydrogenase, NAD binding domain)	GO:0008652(biological_process:cellular amino acid biosynthetic process); GO:0036094(molecular_function:small molecule binding); GO:0016616(molecular_function:oxidoreductase activity, acting on the CH-OH group of donors, NAD or NADP as acceptor)	gi|545365728|ref|XP_005647813.1|( D-3-phosphoglycerate dehydrogenase [Coccomyxa subellipsoidea C-169])	gi|731484|sp|P40054.1|SERA_YEAST(RecName: Full=D-3-phosphoglycerate dehydrogenase 1; Short=3-PGDH 1)
miR399k	TRINITY_DN83619_c0_g2	2.5	1	21	1277	1297	TGCCAAAGGAAATTTGCCCCG	|||||||:||||*|:|||*||	ACGGTTTTCTTTTAGCGGTGC									GO:0051082(molecular_function:unfolded protein binding); GO:0031072(molecular_function:heat shock protein binding)	gi|902161871|gb|KNA06605.1|( hypothetical protein SOVF_179440 [Spinacia oleracea])	gi|81898706|sp|Q8C3L1.1|SSUH2_MOUSE(RecName: Full=Protein SSUH2 homolog; AltName: Full=Protein ssu-2 homolog)
miR399k	TRINITY_DN86649_c2_g2	2.5	1	21	1115	1135	TGCCAAAGGAAATTTGCCCCG	||||||||||*|*||||||*|	ACGGTTTCCTCTTAACGGGAC										gi|225463450|ref|XP_002272654.1|( PREDICTED: agamous-like MADS-box protein AGL62 [Vitis vinifera])	_
miR399k	TRINITY_DN87576_c2_g2	2.5	1	21	932	951	TGCCAAAGGAAATTTGCCCCG	*|||||*||||||||||**||	TCGGTTGCCTTTAAACG-AGC								PF13857.3(Ank_5:Ankyrin repeats (many copies)); PF00023.27(Ank:Ankyrin repeat); PF12796.4(Ank_2:Ankyrin repeats (3 copies)); PF13606.3(Ank_3:Ankyrin repeat); PF13962.3(PGG:Domain of unknown function); PF13637.3(Ank_4:Ankyrin repeats (many copies))	GO:0016020(cellular_component:membrane)	gi|902158629|gb|KNA06239.1|( hypothetical protein SOVF_182470 [Spinacia oleracea])	gi|75315914|sp|Q9ZU96.1|Y2168_ARATH(RecName: Full=Ankyrin repeat-containing protein At2g01680)
miR399k	TRINITY_DN90017_c4_g3	2.5	1	21	3307	3327	TGCCAAAGGAAATTTGCCCCG	||||||||||||||*||*|**	ACGGTTTCCTTTAATCGAGAA								PF00069.22(Pkinase:Protein kinase domain); PF07714.14(Pkinase_Tyr:Protein tyrosine kinase); PF14381.3(EDR1:Ethylene-responsive protein kinase Le-CTR1); PF13855.3(LRR_8:Leucine rich repeat); PF12799.4(LRR_4:Leucine Rich repeats (2 copies))		gi|902224336|gb|KNA19759.1|( hypothetical protein SOVF_058550 [Spinacia oleracea])	gi|308153470|sp|Q55GV3.2|PAKC_DICDI(RecName: Full=Serine/threonine-protein kinase pakC; Short=dPAKc)
miR164c	TRINITY_DN86800_c2_g4	2.5	1	21	2507	2528	TGGAGAAGCAGGGTACGT-GCA	*||||||:|||||*||||*|||	TCCTCTTTGTCCCCTGCAGCGT								PF02493.17(MORN:MORN repeat)		gi|870847547|gb|KMS99894.1|( hypothetical protein BVRB_1g017420 [Beta vulgaris subsp. vulgaris])	gi|78099094|sp|Q8L850.2|PI5K9_ARATH(RecName: Full=Phosphatidylinositol 4-phosphate 5-kinase 9; Short=AtPIP5K9; AltName: Full=1-phosphatidylinositol 4-phosphate kinase 9; AltName: Full=Diphosphoinositide kinase 9; AltName: Full=PtdIns(4)P-5-kinase 9)
miR164c	TRINITY_DN89422_c2_g5	2.5	1	21	1125	1144	TGGAGAAGCAGGGTACGTGCA	||:|||||||:||*|||||*|	ACTTCTTCGTTCCCTGCAC-T								PF03732.14(Retrotrans_gag:Retrotransposon gag protein)		gi|731340224|ref|XP_010681279.1|( PREDICTED: uncharacterized protein LOC104896263 [Beta vulgaris subsp. vulgaris])	_
miR159a	TRINITY_DN71525_c0_g2	2.5	1	21	46	65	TTTGGATTGAAGGGAGCTCTA	||||||||||||:|||***||	AAACCTAACTTCTCTC-TTAT	COG0712(C:Energy production and conversion )		COG0712(F(1)F(0) ATP synthase produces ATP from ADP in the presence of a proton or sodium gradient. F-type ATPases consist of two structural domains, F(1) containing the extramembraneous catalytic core and F(0) containing the membrane proton channel, linked together by a central stalk and a peripheral stalk. During catalysis, ATP synthesis in the catalytic domain of F(1) is coupled via a rotary m…		K02113	ATPF1D, atpH	map00195(Photosynthesis); map00190(Oxidative phosphorylation)	PF00213.15(OSCP:ATP synthase delta (OSCP) subunit)	GO:0015986(biological_process:ATP synthesis coupled proton transport); GO:0046933(molecular_function:proton-transporting ATP synthase activity, rotational mechanism); GO:0016020(cellular_component:membrane)	gi|18491181|gb|AAL69493.1|( putative H+-transporting ATP synthase [Arabidopsis thaliana])	gi|75207569|sp|Q9SSS9.1|ATPD_ARATH(RecName: Full=ATP synthase subunit delta, chloroplastic; AltName: Full=ATP synthase F(1) sector subunit delta; AltName: Full=F-type ATPase subunit delta; Flags: Precursor)
miR159a	TRINITY_DN87276_c0_g1	2.5	1	21	2205	2225	TTTGGATTGAAGGGAGCTCTA	|||||||||||:|:|:||*|*	AAACCTAACTTTCTTTGACAC								PF03140.12(DUF247:Plant protein of unknown function); PF03248.10(Rer1:Rer1 family)	GO:0016021(cellular_component:integral component of membrane)	gi|902239100|gb|KNA25444.1|( hypothetical protein SOVF_006110 [Spinacia oleracea])	gi|6225938|sp|O48670.1|RER1A_ARATH(RecName: Full=Protein RER1A; Short=AtRER1A)
miR159a	TRINITY_DN89792_c0_g1	2.5	1	21	2395	2415	TTTGGATTGAAGGGAGCTCTA	|||||*||:||||||||:*:|	AAACCAAATTTCCCTCGGTGT		NOG126820(S:Function unknown )		NOG126820(BTB POZ domain-containing protein At3g50780-like)						gi|731339587|ref|XP_010680938.1|( PREDICTED: BTB/POZ domain-containing protein At3g50780 [Beta vulgaris subsp. vulgaris])	gi|75212286|sp|Q9SVM0.1|Y3078_ARATH(RecName: Full=BTB/POZ domain-containing protein At3g50780)
miR159a	TRINITY_DN92231_c1_g6	2.5	1	21	296	316	TTTGGATTGAAGGGAGCTCTA	:|||||||||||:|||**|:|	GAACCTAACTTCTCTCCCGGT					K09422	MYBP			GO:0003677(molecular_function:DNA binding)	gi|970029111|ref|XP_015075880.1|( PREDICTED: protein ODORANT1-like [Solanum pennellii])	gi|68052409|sp|Q50EX6.1|ODO1_PETHY(RecName: Full=Protein ODORANT1; AltName: Full=MYB-like protein ODO1)
miR396b-3p	TRINITY_DN91398_c1_g2	2.5	1	21	1179	1198	GCTCAAGAAAGCTGTGGGAAA	||||*||||||||||::*|||	CGAGGTCTTTCGACATT-TTT								PF04515.9(Choline_transpo:Plasma-membrane choline transporter)	GO:0016021(cellular_component:integral component of membrane)	gi|731367895|ref|XP_010695852.1|( PREDICTED: CTL-like protein DDB_G0274487 [Beta vulgaris subsp. vulgaris])	gi|74860295|sp|Q869R1.1|CTLHB_DICDI(RecName: Full=CTL-like protein DDB_G0274487)
miR169d-5p	TRINITY_DN67793_c0_g1	2.5	1	21	108	128	AAGCCAAGGATGACTTGCCGG	*||**||||||||||||||||	ATCCTTTCCTACTGAACGGCC					K12124	GI	map04712(Circadian rhythm - plant)		GO:0009409(biological_process:response to cold); GO:0009908(biological_process:flower development); GO:0006355(biological_process:regulation of transcription, DNA-templated); GO:0009637(biological_process:response to blue light); GO:0030154(biological_process:cell differentiation); GO:0010378(biological_process:temperature compensation of the circadian clock); GO:0010218(biological_process:respon…	gi|222617868|gb|EEE54000.1|( hypothetical protein OsJ_00641 [Oryza sativa Japonica Group])	gi|67476983|sp|Q9AWL7.2|GIGAN_ORYSJ(RecName: Full=Protein GIGANTEA)
miR169d-5p	TRINITY_DN92789_c5_g1	2.5	1	21	3037	3057	AAGCCAAGGATGACTTGCCGG	|||||||*|||||||:||*::	TTCGGTTGCTACTGAGCGTTT	COG1269(C:Energy production and conversion )		COG1269(ATPase 116 kDa subunit)		K02154	ATPeV0A, ATP6N	map04145(Phagosome); map00190(Oxidative phosphorylation)	PF01496.16(V_ATPase_I:V-type ATPase 116kDa subunit family)	GO:0000325(cellular_component:plant-type vacuole); GO:0046961(molecular_function:proton-transporting ATPase activity, rotational mechanism); GO:0015991(biological_process:ATP hydrolysis coupled proton transport); GO:0070072(biological_process:vacuolar proton-transporting V-type ATPase complex assembly); GO:0000220(cellular_component:vacuolar proton-transporting V-type ATPase, V0 domain); GO:00070…	gi|731360083|ref|XP_010691625.1|( PREDICTED: V-type proton ATPase subunit a1 [Beta vulgaris subsp. vulgaris])	gi|75158780|sp|Q8RWZ7.1|VHAA1_ARATH(RecName: Full=V-type proton ATPase subunit a1; Short=V-ATPase subunit a1; AltName: Full=V-type proton ATPase 95 kDa subunit a isoform 1; Short=V-ATPase 95 kDa isoform a1; AltName: Full=Vacuolar H(+)-ATPase subunit a isoform 1; AltName: Full=Vacuolar proton pump subunit a1; AltName: Full=Vacuolar proton translocating ATPase 95 kDa subunit a isoform 1)
miR159b-5p	TRINITY_DN87869_c2_g5	2.5	1	21	1681	1701	GAGCTCCTTGAAGTTCAATGG	||:*|||||||||:||||::|	CTTTAGGAACTTCGAGTTGTC								PF01936.15(NYN:NYN domain)		gi|902224656|gb|KNA19846.1|( hypothetical protein SOVF_057660 [Spinacia oleracea])	_
miR159b-5p	TRINITY_DN89725_c1_g6	2.5	1	21	1203	1224	GAGCTCCTTGAAGTTCAA-TGG	:|||||||::||||||||*|*:	TTCGAGGAGTTTCAAGTTTAGT										gi|902224632|gb|KNA19838.1|( hypothetical protein SOVF_057930 [Spinacia oleracea])	_
miR159b-5p	TRINITY_DN90522_c1_g1	2.5	1	21	992	1011	GAGCTCCTTGAAGTTCAATGG	*||||*|||||||||||*:|:	ATCGATGAACTTCAAGT-GCT		NOG121685(S:Function unknown )		NOG121685(promastigote surface antigen protein 2 PSA2. Source GeneDB)				PF00069.22(Pkinase:Protein kinase domain); PF07714.14(Pkinase_Tyr:Protein tyrosine kinase); PF13855.3(LRR_8:Leucine rich repeat); PF08263.9(LRRNT_2:Leucine rich repeat N-terminal domain); PF12799.4(LRR_4:Leucine Rich repeats (2 copies)); PF00560.30(LRR_1:Leucine Rich Repeat); PF13516.3(LRR_6:Leucine Rich repeat)	GO:0006468(biological_process:protein phosphorylation); GO:0005524(molecular_function:ATP binding); GO:0016021(cellular_component:integral component of membrane); GO:0004674(molecular_function:protein serine/threonine kinase activity)	gi|902168691|gb|KNA07540.1|( hypothetical protein SOVF_170800, partial [Spinacia oleracea])	gi|264664533|sp|C0LGU5.1|Y5457_ARATH(RecName: Full=Probable LRR receptor-like serine/threonine-protein kinase At5g45780; Flags: Precursor)
miR167g-3p	TRINITY_DN105224_c0_g1	2.5	1	21	8	28	AGATCATGTGGCAGTTTCACC	||||||||::||||:|||*|*	TCTAGTACGTCGTCGAAGAGT					K20223	IPO7, RANBP7				gi|612386208|ref|XP_007508625.1|( predicted protein [Bathycoccus prasinos])	gi|74644186|sp|O59809.1|IMA3_SCHPO(RecName: Full=Probable importin c550.11)
miR167g-3p	TRINITY_DN87259_c4_g4	2.5	1	21	1359	1379	AGATCATGTGGCAGTTTCACC	|||||||:||:*||||||||*	TCTAGTATACTATCAAAGTGA		NOG172512(S:Function unknown )		NOG172512()						gi|731313286|ref|XP_010679295.1|( PREDICTED: uncharacterized protein LOC104894701 [Beta vulgaris subsp. vulgaris])	_
miR167g-3p	TRINITY_DN89055_c1_g5	2.5	1	21	29	50	AGATCATGTGGCAGTTTCAC-C	*|||||*||:||||||||||*|	ACTAGTTCATCGTCAAAGTGTG								PF08282.9(Hydrolase_3:haloacid dehalogenase-like hydrolase); PF05116.10(S6PP:Sucrose-6F-phosphate phosphohydrolase); PF00702.23(Hydrolase:haloacid dehalogenase-like hydrolase)	GO:0004222(molecular_function:metalloendopeptidase activity); GO:0006364(biological_process:rRNA processing); GO:0006508(biological_process:proteolysis)	gi|297822029|ref|XP_002878897.1|( hypothetical protein ARALYDRAFT_901259 [Arabidopsis lyrata subsp. lyrata])	gi|68066493|sp|P0A8Y5.1|YIDA_ECOLI(RecName: Full=Sugar phosphatase YidA >gi|68066498|sp|P0A8Y6.1|YIDA_ECOL6 RecName: Full=Sugar phosphatase YidA >gi|68066501|sp|P0A8Y7.1|YIDA_SHIFL RecName: Full=Sugar phosphatase YidA)
miR159c	TRINITY_DN87276_c0_g1	2.5	1	21	2206	2225	TTTGGATTGAAGGGAGCTCCT	|||||||||||:|:|:||**|	AAACCTAACTTTCTTTGA-CA								PF03140.12(DUF247:Plant protein of unknown function); PF03248.10(Rer1:Rer1 family)	GO:0016021(cellular_component:integral component of membrane)	gi|902239100|gb|KNA25444.1|( hypothetical protein SOVF_006110 [Spinacia oleracea])	gi|6225938|sp|O48670.1|RER1A_ARATH(RecName: Full=Protein RER1A; Short=AtRER1A)
miR159c	TRINITY_DN88297_c0_g1	2.5	1	21	1950	1969	TTTGGATTGAAGGGAGCTCCT	|||||||*||||||||*|*||	AAACCTACCTTCCCTC-ATGA								PF14571.3(Di19_C:Stress-induced protein Di19, C-terminal); PF05605.9(zf-Di19:Drought induced 19 protein (Di19), zinc-binding); PF13894.3(zf-C2H2_4:C2H2-type zinc finger)		gi|920687020|gb|KOM31003.1|( hypothetical protein LR48_Vigan01g055800 [Vigna angularis])	gi|75117002|sp|Q688X9.1|DI191_ORYSJ(RecName: Full=Protein DEHYDRATION-INDUCED 19; AltName: Full=OsDi19)
miR159c	TRINITY_DN89130_c0_g1	2.5	1	21	423	442	TTTGGATTGAAGGGAGCTCCT	||||||||||||:||:|***|	AAACCTAACTTCTCTTG-TAA								PF05637.9(Glyco_transf_34:galactosyl transferase GMA12/MNN10 family)	GO:0016740(molecular_function:transferase activity); GO:0016020(cellular_component:membrane)	gi|731337198|ref|XP_010679659.1|( PREDICTED: putative glycosyltransferase 7 [Beta vulgaris subsp. vulgaris])	gi|46576210|sp|O81007.1|GT7_ARATH(RecName: Full=Putative glycosyltransferase 7; Short=AtGT7)
miR159c	TRINITY_DN89906_c4_g1	2.5	1	21	1597	1617	TTTGGATTGAAGGGAGCTCCT	*|||:||||||||:|||**||	CAACTTAACTTCCTTCGTTGA					K03965	NDUFB9	map00190(Oxidative phosphorylation)		GO:0005747(cellular_component:mitochondrial respiratory chain complex I); GO:0006120(biological_process:mitochondrial electron transport, NADH to ubiquinone)	gi|902236632|gb|KNA24471.1|( hypothetical protein SOVF_015350 [Spinacia oleracea])	gi|75164329|sp|Q945M1.1|NDUB9_ARATH(RecName: Full=NADH dehydrogenase [ubiquinone] 1 beta subcomplex subunit 9; AltName: Full=B22 subunit of eukaryotic mitochondrial complex I; AltName: Full=Complex I-B22; Short=AtCIB22; Short=CI-B22; AltName: Full=NADH-ubiquinone oxidoreductase B22 subunit)
miR172e-5p	TRINITY_DN24950_c0_g1	2.5	1	20	286	304	GCAGCACCATTAAGATTCAC	||||||||||*||||*|*||	CGTCGTGGTACTTCTTA-TG									GO:0009536(cellular_component:plastid)	gi|1002266773|ref|XP_015637718.1|( PREDICTED: uncharacterized protein LOC4337922 [Oryza sativa Japonica Group])	_
miR172e-5p	TRINITY_DN31257_c0_g1	2.5	1	20	366	385	GCAGCACCATTAAGATTCAC	||*:||||||||||*|||||	CGGTGTGGTAATTCGAAGTG					K01537	E3.6.3.8		PF00122.17(E1-E2_ATPase:E1-E2 ATPase)	GO:0005388(molecular_function:calcium-transporting ATPase activity); GO:0005516(molecular_function:calmodulin binding); GO:0043231(cellular_component:intracellular membrane-bounded organelle); GO:0070588(biological_process:calcium ion transmembrane transport); GO:0046872(molecular_function:metal ion binding); GO:0005887(cellular_component:integral component of plasma membrane); GO:0005524(molecul…	gi|902167060|gb|KNA07320.1|( hypothetical protein SOVF_172280 [Spinacia oleracea])	gi|110832728|sp|Q2QY12.1|ACA4_ORYSJ(RecName: Full=Probable calcium-transporting ATPase 4, plasma membrane-type; AltName: Full=Ca(2+)-ATPase isoform 4)
miR172e-5p	TRINITY_DN79910_c0_g1	2.5	1	20	218	237	GCAGCACCATTAAGATTCAC	*|||||||||*||||||*|*	AGTCGTGGTACTTCTAATTC	COG5580(O:Posttranslational modification, protein turnover, chaperones )		COG5580(AHA1, activator of heat shock 90kDa protein ATPase homolog)					PF08327.8(AHSA1:Activator of Hsp90 ATPase homolog 1-like protein)		gi|545374415|ref|XP_005651496.1|( hypothetical protein COCSUDRAFT_21985 [Coccomyxa subellipsoidea C-169])	gi|48474991|sp|Q9P782.1|YNY8_SCHPO(RecName: Full=Uncharacterized protein C1711.08)
miR172e-5p	TRINITY_DN84401_c1_g2	2.5	1	20	534	553	GCAGCACCATTAAGATTCAC	|||||||||::||*||:|||	CGTCGTGGTGGTTGTAGGTG	COG5019(Z:Cytoskeleton); COG5019(D:Cell cycle control, cell division, chromosome partitioning)		COG5019(Cell division control protein); COG5019(Cell division control protein)		K16938	SEPT3_9_12		PF00735.15(Septin:Septin); PF01926.20(MMR_HSR1:50S ribosome-binding GTPase); PF03193.13(DUF258:Protein of unknown function, DUF258); PF04548.13(AIG1:AIG1 family); PF00009.24(GTP_EFTU:Elongation factor Tu GTP binding domain)		gi|694452645|ref|XP_009351222.1|( PREDICTED: cell division control protein 3-like [Pyrus x bretschneideri])	gi|12644394|sp|Q09116.2|SPN2_SCHPO(RecName: Full=Septin homolog spn2)
miR172e-5p	TRINITY_DN84585_c0_g1	2.5	1	20	2240	2259	GCAGCACCATTAAGATTCAC	*||||||||||*|||||**|	GGTCGTGGTAAATCTAAAGG								PF08424.7(NRDE-2:NRDE-2, necessary for RNA interference)		gi|902218740|gb|KNA18120.1|( hypothetical protein SOVF_073710 [Spinacia oleracea])	gi|296439394|sp|Q9H7Z3.3|NRDE2_HUMAN(RecName: Full=Protein NRDE2 homolog)
miR172e-5p	TRINITY_DN84704_c0_g1	2.5	1	20	983	1002	GCAGCACCATTAAGATTCAC	|||:|||*||:|||||:|||	CGTTGTGATAGTTCTAGGTG										gi|1035893778|gb|OAY23382.1|( hypothetical protein MANES_18G074300 [Manihot esculenta])	_
miR172e-5p	TRINITY_DN86468_c0_g1	2.5	1	20	1299	1317	GCAGCACCATTAAGATTCAC	||||||*||::||||||*||	CGTCGTTGTGGTTCTAA-TG	COG1297(S:Function unknown )		COG1297(oligo-peptide transporter)					PF03169.12(OPT:OPT oligopeptide transporter protein); PF04520.10(Senescence_reg:Senescence regulator)	GO:0055085(biological_process:transmembrane transport); GO:0016021(cellular_component:integral component of membrane)	gi|731321458|ref|XP_010671364.1|( PREDICTED: metal-nicotianamine transporter YSL3-like isoform X1 [Beta vulgaris subsp. vulgaris])	gi|122197349|sp|Q2EF88.1|YSL3_ARATH(RecName: Full=Metal-nicotianamine transporter YSL3; AltName: Full=Protein YELLOW STRIPE LIKE 3; Short=AtYSL3)
miR172e-5p	TRINITY_DN89183_c1_g2	2.5	1	20	343	362	GCAGCACCATTAAGATTCAC	*||*||||||||||||:*||	GGTAGTGGTAATTCTAGTTG		NOG21361(S:Function unknown )		NOG21361(FG-GAP repeat-containing protein)					GO:0016021(cellular_component:integral component of membrane)	gi|743777110|ref|XP_010918974.1|( PREDICTED: uncharacterized protein LOC105043210 isoform X1 [Elaeis guineensis])	_
miR172e-5p	TRINITY_DN9625_c0_g1	2.5	1	20	551	569	GCAGCACCATTAAGATTCAC	||||||||||||*||:*|||	CGTCGTGGTAATCCTG-GTG	COG0022(C:Energy production and conversion )		COG0022(Dehydrogenase, E1 component)		K00162	PDHB, pdhB	map00020(Citrate cycle (TCA cycle)); map00010(Glycolysis / Gluconeogenesis); map00620(Pyruvate metabolism)	PF02779.21(Transket_pyr:Transketolase, pyrimidine binding domain); PF02780.17(Transketolase_C:Transketolase, C-terminal domain)	GO:0004739(molecular_function:pyruvate dehydrogenase (acetyl-transferring) activity); GO:0006086(biological_process:acetyl-CoA biosynthetic process from pyruvate); GO:0055114(biological_process:oxidation-reduction process)	gi|1026067430|ref|XP_016578148.1|( PREDICTED: pyruvate dehydrogenase E1 component subunit beta-1, mitochondrial [Capsicum annuum])	gi|585609|sp|P32473.2|ODPB_YEAST(RecName: Full=Pyruvate dehydrogenase E1 component subunit beta, mitochondrial; AltName: Full=Pyruvate dehydrogenase complex component E1 beta; Short=PDHE1-B; Flags: Precursor)
miR166k-3p	TRINITY_DN82132_c0_g2	2.5	1	21	2838	2858	TCGGACCAGGCTTCAATCCCT	|||||||*:||||||||*|*|	AGCCTGGGTCGAAGTTACGAA	COG5347(U:Intracellular trafficking, secretion, and vesicular transport )		COG5347(ankyrin repeat and PH)		K12489	ACAP	map04144(Endocytosis)	PF16746.2(BAR_3:BAR domain of APPL family); PF01412.15(ArfGap:Putative GTPase activating protein for Arf); PF13857.3(Ank_5:Ankyrin repeats (many copies)); PF00023.27(Ank:Ankyrin repeat); PF00169.26(PH:PH domain); PF03114.15(BAR:BAR domain); PF13637.3(Ank_4:Ankyrin repeats (many copies)); PF12796.4(Ank_2:Ankyrin repeats (3 copies)); PF13606.3(Ank_3:Ankyrin repeat); PF15409.3(PH_8:Pleckstrin homolo…	GO:0005096(molecular_function:GTPase activator activity); GO:0005737(cellular_component:cytoplasm); GO:0043547(biological_process:positive regulation of GTPase activity)	gi|731347640|ref|XP_010685091.1|( PREDICTED: ADP-ribosylation factor GTPase-activating protein AGD3-like isoform X2 [Beta vulgaris subsp. vulgaris])	gi|75321812|sp|Q5W7F2.1|AGD3_ARATH(RecName: Full=ADP-ribosylation factor GTPase-activating protein AGD3; Short=ARF GAP AGD3; AltName: Full=Protein ARF-GAP DOMAIN 3; Short=AtAGD3; AltName: Full=Protein FORKED 2; AltName: Full=Protein SCARFACE; AltName: Full=Protein VASCULAR NETWORK 3)
miR156a-3p	TRINITY_DN89004_c0_g1	2.5	1	22	1293	1314	GCTCACTGCTCTTTCTGTCAGA	:||||||||:|:|:|||:||*|	TGAGTGACGGGGAGGACGGTGT					K15188	CCNT		PF00134.20(Cyclin_N:Cyclin, N-terminal domain)		gi|731323930|ref|XP_010672696.1|( PREDICTED: cyclin-T1-3-like [Beta vulgaris subsp. vulgaris])	gi|122248588|sp|Q2QQS5.1|CCT14_ORYSJ(RecName: Full=Cyclin-T1-4; Short=CycT1;4)
miR156a-3p	TRINITY_DN91183_c0_g2	2.5	1	22	1349	1370	GCTCACTGCTCTTTCTGTCAGA	||||*|||||||||||*|*|||	CGAGCGACGAGAAAGAGAATCT		NOG107580(S:Function unknown )		NOG107580(CPDc)				PF03031.15(NIF:NLI interacting factor-like phosphatase)		gi|902109568|gb|KNA03689.1|( hypothetical protein SOVF_206710 [Spinacia oleracea])	gi|68052995|sp|O94336.1|YHM3_SCHPO(RecName: Full=Uncharacterized FCP1 homology domain-containing protein C1271.03c)
miR390d-3p	TRINITY_DN77773_c1_g1	2.5	1	21	151	172	CGCTATCCATCCTGAGTTT-TA	*:||*||||||||||||||*||	ATGACAGGTAGGACTCAAAGAT					K12842	SR140	map03040(Spliceosome)				gi|75070608|sp|Q5R7X2.1|SR140_PONAB(RecName: Full=U2 snRNP-associated SURP motif-containing protein; AltName: Full=140 kDa Ser/Arg-rich domain protein; AltName: Full=U2-associated protein SR140)
miR390b-3p	TRINITY_DN77773_c1_g1	2.5	1	20	153	172	CGCTATCCATCCTGAGTTCC	*:||*|||||||||||||*|	ATGACAGGTAGGACTCAAAG					K12842	SR140	map03040(Spliceosome)				gi|75070608|sp|Q5R7X2.1|SR140_PONAB(RecName: Full=U2 snRNP-associated SURP motif-containing protein; AltName: Full=140 kDa Ser/Arg-rich domain protein; AltName: Full=U2-associated protein SR140)
miR390b-3p	TRINITY_DN93210_c0_g2	2.5	1	20	28	47	CGCTATCCATCCTGAGTTCC	|:|||||||:|||:*|||||	GTGATAGGTGGGATCCAAGG					K04646	CLTC	map04144(Endocytosis)	PF00637.17(Clathrin:Region in Clathrin and VPS)	GO:0016192(biological_process:vesicle-mediated transport); GO:0030132(cellular_component:clathrin coat of coated pit); GO:0030130(cellular_component:clathrin coat of trans-Golgi network vesicle); GO:0006886(biological_process:intracellular protein transport); GO:0005198(molecular_function:structural molecule activity)	gi|902234045|gb|KNA23309.1|( hypothetical protein SOVF_026060 [Spinacia oleracea])	gi|122232855|sp|Q2RBN7.1|CLH1_ORYSJ(RecName: Full=Clathrin heavy chain 1)
miR394a-5p	TRINITY_DN118870_c0_g1	2.5	1	20	142	161	TTGGCATTCTGTCCACCTCC	|||:|*|||||||||||**|	AACTGCAAGACAGGTGGCCG					K15034	yaeJ		PF00472.17(RF-1:RF-1 domain)		gi|743851802|ref|XP_011029087.1|( PREDICTED: peptidyl-tRNA hydrolase ICT1, mitochondrial-like [Populus euphratica])	gi|1175508|sp|P45388.1|ARFB_PSEPU(RecName: Full=Peptidyl-tRNA hydrolase ArfB; Short=PTH; AltName: Full=Alternative ribosome-rescue factor B)
miR394a-5p	TRINITY_DN85161_c0_g1	2.5	1	20	448	467	TTGGCATTCTGTCCACCTCC	|||:||:||:|:|||||*||	AACTGTGAGGCGGGTGGTGG		NOG00192(G:Carbohydrate transport and metabolism )		NOG00192(Transporter)				PF00083.21(Sugar_tr:Sugar (and other) transporter); PF07690.13(MFS_1:Major Facilitator Superfamily)	GO:0055085(biological_process:transmembrane transport); GO:0016021(cellular_component:integral component of membrane); GO:0022891(molecular_function:substrate-specific transmembrane transporter activity)	gi|731352845|ref|XP_010687752.1|( PREDICTED: sugar transport protein 7 [Beta vulgaris subsp. vulgaris])	gi|1723182|sp|Q10710.1|STA_RICCO(RecName: Full=Sugar carrier protein A)
miR394a-5p	TRINITY_DN87515_c2_g1	2.5	1	20	4507	4526	TTGGCATTCTGTCCACCTCC	*||*|||||||||*||||||	TACGGTAAGACAGCTGGAGG					K00142	AASDH		PF00501.25(AMP-binding:AMP-binding enzyme); PF13570.3(PQQ_3:PQQ-like domain); PF13360.3(PQQ_2:PQQ-like domain); PF01011.18(PQQ:PQQ enzyme repeat); PF13193.3(AMP-binding_C:AMP-binding enzyme C-terminal domain); PF00550.22(PP-binding:Phosphopantetheine attachment site); PF14368.3(LTP_2:Probable lipid transfer); PF00234.19(Tryp_alpha_amyl:Protease inhibitor/seed storage/LTP family)		gi|731336089|ref|XP_010679069.1|( PREDICTED: putative acyl-activating enzyme 19 [Beta vulgaris subsp. vulgaris])	gi|378548266|sp|F4K1G2.1|AEE19_ARATH(RecName: Full=Putative acyl-activating enzyme 19)
miR394a-5p	TRINITY_DN90503_c2_g1	2.5	1	20	4859	4879	TTGGCATTCTGTCCACCTC-C	||:|||:||::||||||||*|	AATCGTGAGGTAGGTGGAGTG								PF00644.17(PARP:Poly(ADP-ribose) polymerase catalytic domain); PF12174.5(RST:RCD1-SRO-TAF4 (RST) plant domain)	GO:0016757(molecular_function:transferase activity, transferring glycosyl groups)	gi|731318186|ref|XP_010669586.1|( PREDICTED: inactive poly [ADP-ribose] polymerase RCD1-like [Beta vulgaris subsp. vulgaris])	gi|75158974|sp|Q8RY59.1|RCD1_ARATH(RecName: Full=Inactive poly [ADP-ribose] polymerase RCD1; AltName: Full=Protein RADICAL-INDUCED CELL DEATH 1)
miR394a-5p	TRINITY_DN95876_c0_g1	2.5	1	20	65	84	TTGGCATTCTGTCCACCTCC	|:||||||||||*|*|||||	AGCCGTAAGACACGCGGAGG					K08955	YME1			GO:0016787(molecular_function:hydrolase activity); GO:0009507(cellular_component:chloroplast); GO:0016020(cellular_component:membrane)	gi|308808914|ref|XP_003081767.1|( AAA+-type ATPase (ISS) [Ostreococcus tauri])	gi|31340080|sp|Q89AF2.1|FTSH_BUCBP(RecName: Full=ATP-dependent zinc metalloprotease FtsH)
miR8175	TRINITY_DN104770_c0_g1	2.5	1	20	180	199	GATCCCCGGCAACGGCGCCA	|||||*|||||*|||||*||	CTAGGCGCCGTGGCCGCCGT					K04564	SOD2	map04146(Peroxisome)	PF02777.15(Sod_Fe_C:Iron/manganese superoxide dismutases, C-terminal domain)	GO:0016491(molecular_function:oxidoreductase activity); GO:0006801(biological_process:superoxide metabolic process)	gi|552842324|ref|XP_005850533.1|( hypothetical protein CHLNCDRAFT_140393 [Chlorella variabilis])	gi|7388259|sp|Q9XD74.3|SODF_RHIME(RecName: Full=Superoxide dismutase [Mn])
miR8175	TRINITY_DN126707_c0_g1	2.5	1	20	184	203	GATCCCCGGCAACGGCGCCA	|||*||||:|||||||:*||	CTACGGGCTGTTGCCGTAGT					K03431	glmM	map00520(Amino sugar and nucleotide sugar metabolism)	PF02878.13(PGM_PMM_I:Phosphoglucomutase/phosphomannomutase, alpha/beta/alpha domain I)			gi|158513098|sp|A1SF29.1|GLMM_NOCSJ(RecName: Full=Phosphoglucosamine mutase)
miR8175	TRINITY_DN139494_c0_g1	2.5	1	20	166	185	GATCCCCGGCAACGGCGCCA	*|||*||||||||:||:|||	GTAGTGGCCGTTGTCGTGGT					K14347	SLC10A7, P7		PF13593.3(SBF_like:SBF-like CPA transporter family (DUF4137))		gi|1023967164|gb|KZV15462.1|( hypothetical protein F511_15565 [Dorcoceras hygrometricum])	gi|2506699|sp|P39836.2|YFEH_ECOLI(RecName: Full=Uncharacterized protein YfeH)
miR8175	TRINITY_DN87310_c1_g1	2.5	1	20	1352	1371	GATCCCCGGCAACGGCGCCA	*||*||||:||||||||*||	GTAAGGGCTGTTGCCGCAGT					K04733	IRAK4		PF00069.22(Pkinase:Protein kinase domain); PF07714.14(Pkinase_Tyr:Protein tyrosine kinase)	GO:0004672(molecular_function:protein kinase activity); GO:0006468(biological_process:protein phosphorylation); GO:0005524(molecular_function:ATP binding); GO:0016021(cellular_component:integral component of membrane)	gi|731364009|ref|XP_010693739.1|( PREDICTED: putative kinase-like protein TMKL1 [Beta vulgaris subsp. vulgaris])	gi|464900|sp|P33543.1|TMKL1_ARATH(RecName: Full=Putative kinase-like protein TMKL1; Flags: Precursor)
miR8175	TRINITY_DN87460_c0_g7	2.5	1	20	1188	1208	GATCCCCGGCAACGGCGCC-A	*||*|||||||||||||*|*|	GTATGGGCCGTTGCCGCCGCT		NOG03966(R:General function prediction only ); NOG187621(U:Intracellular trafficking, secretion, and vesicular transport )		NOG03966(FH2 domain containing 1); NOG187621(Formin-like protein)				PF02181.20(FH2:Formin Homology 2 Domain)	GO:0016021(cellular_component:integral component of membrane)	gi|731335986|ref|XP_010679014.1|( PREDICTED: formin-like protein 1 [Beta vulgaris subsp. vulgaris])	gi|75274615|sp|Q9SE97.1|FH1_ARATH(RecName: Full=Formin-like protein 1; Short=AtFH1; Short=AtFORMIN-8; Flags: Precursor)
miR8175	TRINITY_DN89433_c0_g2	2.5	1	20	1554	1573	GATCCCCGGCAACGGCGCCA	*|||*||||||||*||||||	GTAGTGGCCGTTGACGCGGT	COG0271(T:Signal transduction mechanisms )		COG0271(BolA family)					PF01722.15(BolA:BolA-like protein)		gi|902229931|gb|KNA21650.1|( hypothetical protein SOVF_040890 [Spinacia oleracea])	gi|75170802|sp|Q9FIC3.1|BOLA2_ARATH(RecName: Full=Protein BOLA2)
miR8175	TRINITY_DN89939_c0_g1	2.5	1	20	1505	1523	GATCCCCGGCAACGGCGCCA	||||||*|*||||||||*||	CTAGGGTCAGTTGCCGC-GT								PF03141.13(Methyltransf_29:Putative S-adenosyl-L-methionine-dependent methyltransferase)	GO:0016021(cellular_component:integral component of membrane); GO:0008168(molecular_function:methyltransferase activity); GO:0032259(biological_process:methylation)	gi|902230606|gb|KNA21919.1|( hypothetical protein SOVF_038860 [Spinacia oleracea])	gi|292630946|sp|Q9C9Q8.2|PMTT_ARATH(RecName: Full=Probable pectin methyltransferase QUA2; AltName: Full=Protein OVERSENSITIVE TO SUGAR 1; AltName: Full=Protein QUASIMODO 2; AltName: Full=Protein TUMOROUS SHOOT DEVELOPMENT 2)
miR8175	TRINITY_DN91400_c3_g2	2.5	1	20	2074	2092	GATCCCCGGCAACGGCGCCA	*||||||||||||:||**||	GTAGGGGCCGTTGTCG-AGT	COG0480(J:Translation, ribosomal structure and biogenesis )		COG0480(Catalyzes the GTP-dependent ribosomal translocation step during translation elongation. During this step, the ribosome changes from the pre-translocational (PRE) to the post- translocational (POST) state as the newly formed A-site-bound peptidyl-tRNA and P-site-bound deacylated tRNA move to the P and E sites, respectively. Catalyzes the coordinated movement of the two tRNA molecules, the …		K03234	EEF2		PF00009.24(GTP_EFTU:Elongation factor Tu GTP binding domain); PF03764.15(EFG_IV:Elongation factor G, domain IV); PF00679.21(EFG_C:Elongation factor G C-terminus); PF03144.22(GTP_EFTU_D2:Elongation factor Tu domain 2); PF14492.3(EFG_II:Elongation Factor G, domain II)	GO:0003746(molecular_function:translation elongation factor activity); GO:0005525(molecular_function:GTP binding); GO:0006414(biological_process:translational elongation); GO:0003924(molecular_function:GTPase activity)	gi|694366193|ref|XP_009361805.1|( PREDICTED: elongation factor 2 [Pyrus x bretschneideri])	gi|6015065|sp|O23755.1|EF2_BETVU(RecName: Full=Elongation factor 2; Short=EF-2)
miR8175	TRINITY_DN92160_c3_g1	2.5	1	20	354	373	GATCCCCGGCAACGGCGCCA	|||||||:|||*||*|||||	CTAGGGGTCGTGGCGGCGGT		NOG17880(R:General function prediction only )		NOG17880(Chlorophyll a-b binding protein CP24)	K08917	LHCB6	map00196(Photosynthesis - antenna proteins)	PF00504.18(Chloroa_b-bind:Chlorophyll A-B binding protein)	GO:0010287(cellular_component:plastoglobule); GO:0009941(cellular_component:chloroplast envelope); GO:0031409(molecular_function:pigment binding); GO:0009768(biological_process:photosynthesis, light harvesting in photosystem I); GO:0018298(biological_process:protein-chromophore linkage); GO:0016168(molecular_function:chlorophyll binding); GO:0016021(cellular_component:integral component of membra…	gi|1002264964|ref|XP_015636811.1|( PREDICTED: chlorophyll a-b binding protein CP24, chloroplastic [Oryza sativa Japonica Group])	gi|115833|sp|P27524.1|CB4A_SOLLC(RecName: Full=Chlorophyll a-b binding protein CP24 10A, chloroplastic; Short=CAB-10A; Short=LHCP; Flags: Precursor)
miR8175	TRINITY_DN96088_c0_g1	2.5	1	20	89	108	GATCCCCGGCAACGGCGCCA	*|||||||:||*||||:|||	GTAGGGGCTGTAGCCGTGGT					K09228	KRAB					gi|374110656|sp|P0DJC9.1|SLB_BOTAS(RecName: Full=Snaclec aspercetin subunit beta, partial [Bothrops asper])
miR156e	TRINITY_DN75646_c0_g1	2.5	1	21	97	116	TTGACAGAAGATAGAGAGCAC	|*||||:||||||:||||*||	ACCTGTTTTCTATTTCTC-TG											gi|133175|sp|P00653.2|RNMS_ASPPH(RecName: Full=Guanyl-specific ribonuclease Ms; Short=RNase Ms)
miR156e	TRINITY_DN84930_c0_g1	2.5	1	21	734	753	TTGACAGAAGATAGAGAGCAC	:::|||:||||||||||:*||	GGTTGTTTTCTATCTCTT-TG								PF13347.3(MFS_2:MFS/sugar transport protein); PF07690.13(MFS_1:Major Facilitator Superfamily)	GO:0016021(cellular_component:integral component of membrane)	gi|731360468|ref|XP_010691839.1|( PREDICTED: major facilitator superfamily domain-containing protein 12-like isoform X1 [Beta vulgaris subsp. vulgaris])	gi|125991816|sp|Q6NUT3.2|MFS12_HUMAN(RecName: Full=Major facilitator superfamily domain-containing protein 12)
miR399b	TRINITY_DN85792_c0_g1	2.5	1	21	973	993	TGCCAAAGGAGATTTGCCCGG	||||||*|:|||:|:||||||	ACGGTTCCTTCTGAGCGGGCC								PF02042.12(RWP-RK:RWP-RK domain); PF00564.21(PB1:PB1 domain)		gi|902193294|gb|KNA12259.1|( hypothetical protein SOVF_127540 [Spinacia oleracea])	gi|374095497|sp|Q7X9B9.3|NLP2_ARATH(RecName: Full=Protein NLP2; Short=AtNLP2; AltName: Full=NIN-like protein 2; AltName: Full=Nodule inception protein-like protein 2)
miR319i	TRINITY_DN85902_c0_g1	2.5	1	20	3250	3269	TTGGGCTGAAGGGAGCTCCC	*|||:|||||||*||||||*	TACCTGACTTCCATCGAGGA		NOG04258(S:Function unknown )		NOG04258(Deleted in malignant brain tumors 1)	K13912	DMBT1		PF00431.17(CUB:CUB domain); PF00530.15(SRCR:Scavenger receptor cysteine-rich domain); PF00100.20(Zona_pellucida:Zona pellucida-like domain); PF02408.17(CUB_2:CUB-like domain); PF15494.3(SRCR_2:Scavenger receptor cysteine-rich domain)		gi|552822717|ref|XP_005846189.1|( hypothetical protein CHLNCDRAFT_6829, partial [Chlorella variabilis])	gi|85687557|sp|Q60997.2|DMBT1_MOUSE(RecName: Full=Deleted in malignant brain tumors 1 protein; AltName: Full=Apactin; AltName: Full=CRP-ductin; AltName: Full=Glycoprotein 300; Short=gp300; AltName: Full=Hensin; AltName: Full=Mucin-like glycoprotein; Short=Muclin; AltName: Full=Vomeroglandin; AltName: Full=p80; Flags: Precursor)
miR319i	TRINITY_DN90945_c0_g2	2.5	1	20	334	354	TTGGGCTGAAGGGAGCTCC-C	*||:||||||||:||||*|*|	CACTCGACTTCCTTCGATGCG					K10638	UHRF1, NP95		PF02182.14(SAD_SRA:SAD/SRA domain)	GO:0008270(molecular_function:zinc ion binding); GO:0042393(molecular_function:histone binding); GO:0003677(molecular_function:DNA binding)	gi|731374593|ref|XP_010667008.1|( PREDICTED: E3 ubiquitin-protein ligase ORTHRUS 2-like [Beta vulgaris subsp. vulgaris])	gi|75331157|sp|Q8VYZ0.1|ORTH2_ARATH(RecName: Full=E3 ubiquitin-protein ligase ORTHRUS 2; AltName: Full=Protein VARIANT IN METHYLATION 1)
miR319i	TRINITY_DN91386_c1_g2	2.5	1	20	903	922	TTGGGCTGAAGGGAGCTCCC	|||:||||||||:|*||||*	AACTCGACTTCCTTAGAGGA					K20241	WDR44, RAB11BP		PF05032.9(Spo12:Spo12 family)		gi|731333705|ref|XP_010677871.1|( PREDICTED: WD repeat-containing protein 44 [Beta vulgaris subsp. vulgaris])	_
miR319i	TRINITY_DN91612_c2_g3	2.5	1	20	2000	2019	TTGGGCTGAAGGGAGCTCCC	||||:*||||||||||||**	AACCTCACTTCCCTCGAGAT					K09422	MYBP		PF00249.28(Myb_DNA-binding:Myb-like DNA-binding domain); PF13921.3(Myb_DNA-bind_6:Myb-like DNA-binding domain); PF09111.7(SLIDE:SLIDE)		gi|731326066|ref|XP_010673830.1|( PREDICTED: transcription factor GAMYB-like [Beta vulgaris subsp. vulgaris])	gi|158512823|sp|A2WW87.1|GAM1_ORYSI(RecName: Full=Transcription factor GAMYB; AltName: Full=OsGAMyb)
miR319i	TRINITY_DN93021_c5_g1	2.5	1	20	3829	3848	TTGGGCTGAAGGGAGCTCCC	*||||*||||||:||||*||	TACCCCACTTCCTTCGATGG	COG0296(G:Carbohydrate transport and metabolism )		COG0296(Catalyzes the formation of the alpha-1,6-glucosidic linkages in glycogen by scission of a 1,4-alpha-linked oligosaccharide from growing alpha-1,4-glucan chains and the subsequent attachment of the oligosaccharide to the alpha-1,6 position (By similarity))		K00700	GBE1, glgB	map00500(Starch and sucrose metabolism)	PF02922.15(CBM_48:Carbohydrate-binding module 48 (Isoamylase N-terminal domain)); PF00128.21(Alpha-amylase:Alpha amylase, catalytic domain)	GO:0004553(molecular_function:hydrolase activity, hydrolyzing O-glycosyl compounds); GO:0005978(biological_process:glycogen biosynthetic process); GO:0043169(molecular_function:cation binding); GO:0003844(molecular_function:1,4-alpha-glucan branching enzyme activity)	gi|820687841|dbj|BAR73034.1|( starch branching enzyme [Amaranthus hypochondriacus])	gi|1169912|sp|P30924.2|GLGB_SOLTU(RecName: Full=1,4-alpha-glucan-branching enzyme; AltName: Full=Q-enzyme; AltName: Full=Starch-branching enzyme)
miR399a	TRINITY_DN90585_c1_g8	2.5	1	21	836	856	TGCCAAAGGAGAATTGCCCTG	::|||||:||:||||:||||:	GTGGTTTTCTTTTAATGGGAT					K09490	HSPA5, BIP	map03060(Protein export); map04141(Protein processing in endoplasmic reticulum)	PF00012.17(HSP70:Hsp70 protein); PF06723.10(MreB_Mbl:MreB/Mbl protein); PF10712.6(NAD-GH:NAD-specific glutamate dehydrogenase)	GO:0005524(molecular_function:ATP binding)	gi|1009116878|ref|XP_015875014.1|( PREDICTED: mediator of RNA polymerase II transcription subunit 37a-like [Ziziphus jujuba])	gi|52782864|sp|Q6FW50.1|GRP78_CANGA(RecName: Full=78 kDa glucose-regulated protein homolog; Short=GRP-78; AltName: Full=Immunoglobulin heavy chain-binding protein homolog; Short=BIP; Flags: Precursor)
miR164f	TRINITY_DN6422_c0_g1	2.5	1	21	427	446	TGGAGAAGCAGGGCACATGCT	*:|||||||*|||||||*|||	TTCTCTTCGACCCGTGT-CGA								PF13374.3(TPR_10:Tetratricopeptide repeat); PF13424.3(TPR_12:Tetratricopeptide repeat); PF13181.3(TPR_8:Tetratricopeptide repeat); PF14559.3(TPR_19:Tetratricopeptide repeat); PF13176.3(TPR_7:Tetratricopeptide repeat)		gi|1002243095|ref|XP_015625780.1|( PREDICTED: uncharacterized protein LOC4330477 [Oryza sativa Japonica Group])	_
miR164f	TRINITY_DN85998_c3_g6	2.5	1	21	302	321	TGGAGAAGCAGGGCACATGCT	*||||||*||:||||||*|||	TCCTCTTGGTTCCGTGT-CGA		NOG06605(R:General function prediction only )		NOG06605(Solute carrier family 44 member)	K15377	SLC44A2_4_5		PF04515.9(Choline_transpo:Plasma-membrane choline transporter)	GO:0016021(cellular_component:integral component of membrane); GO:0048364(biological_process:root development); GO:0009506(cellular_component:plasmodesma); GO:0015871(biological_process:choline transport); GO:0015220(molecular_function:choline transmembrane transporter activity); GO:0090603(biological_process:sieve element differentiation); GO:0010051(biological_process:xylem and phloem pattern f…	gi|731366334|ref|XP_010695012.1|( PREDICTED: choline transporter-like protein 2 [Beta vulgaris subsp. vulgaris])	gi|347595649|sp|Q8BY89.2|CTL2_MOUSE(RecName: Full=Choline transporter-like protein 2; AltName: Full=Solute carrier family 44 member 2)
miR164f	TRINITY_DN87275_c2_g1	2.5	1	21	573	593	TGGAGAAGCAGGGCACATGCT	*:|||||||||||||*|||*|	CTCTCTTCGTCCCGTCTACCA	COG0513(L:Replication, recombination and repair )		COG0513(atp-dependent rna helicase)		K12823	DDX5, DBP2	map03040(Spliceosome)	PF00270.26(DEAD:DEAD/DEAH box helicase); PF00271.28(Helicase_C:Helicase conserved C-terminal domain); PF04851.12(ResIII:Type III restriction enzyme, res subunit)	GO:0003676(molecular_function:nucleic acid binding); GO:0005524(molecular_function:ATP binding); GO:0004386(molecular_function:helicase activity)	gi|731335710|ref|XP_010678860.1|( PREDICTED: DEAD-box ATP-dependent RNA helicase 20 [Beta vulgaris subsp. vulgaris])	gi|143454263|sp|Q5N7W4.2|RH30_ORYSJ(RecName: Full=DEAD-box ATP-dependent RNA helicase 30)
miR164f	TRINITY_DN90849_c3_g3	2.5	1	21	2637	2657	TGGAGAAGCAGGGCACATGCT	||||||||*||:|||||*|*|	ACCTCTTCCTCTCGTGTTCTA	COG5049(A:RNA processing and modification); COG5049(D:Cell cycle control, cell division, chromosome partitioning); COG5049(L:Replication, recombination and repair)		COG5049(5'-3' exoribonuclease); COG5049(5'-3' exoribonuclease); COG5049(5'-3' exoribonuclease)		K12619	XRN2, RAT1	map03018(RNA degradation); map03008(Ribosome biogenesis in eukaryotes)	PF03159.15(XRN_N:XRN 5'-3' exonuclease N-terminus)	GO:0004534(molecular_function:5'-3' exoribonuclease activity); GO:0003676(molecular_function:nucleic acid binding); GO:0090503(biological_process:RNA phosphodiester bond hydrolysis, exonucleolytic); GO:0005634(cellular_component:nucleus); GO:0008270(molecular_function:zinc ion binding)	gi|731313625|ref|XP_010681159.1|( PREDICTED: 5'-3' exoribonuclease 3 isoform X2 [Beta vulgaris subsp. vulgaris])	gi|75262832|sp|Q9FQ03.1|XRN3_ARATH(RecName: Full=5'-3' exoribonuclease 3; AltName: Full=Protein EXORIBONUCLEASE 3)
miR6478	TRINITY_DN109492_c0_g1	2.5	1	21	45	64	CCGACCTTAGCTCAGTTGGTG	|||||||||:||||:|*||*|	GGCTGGAATTGAGTTA-CCTC					K06269	PPP1C	map03015(mRNA surveillance pathway)	PF00149.25(Metallophos:Calcineurin-like phosphoesterase)	GO:0006470(biological_process:protein dephosphorylation); GO:0004721(molecular_function:phosphoprotein phosphatase activity); GO:0046872(molecular_function:metal ion binding)	gi|694443031|ref|XP_009348143.1|( PREDICTED: serine/threonine-protein phosphatase PP1 isoform X2 [Pyrus x bretschneideri])	gi|130707|sp|P20654.1|PP1_EMENI(RecName: Full=Serine/threonine-protein phosphatase PP1)
miR169a-3p	TRINITY_DN126664_c0_g1	2.5	1	20	162	181	GGCAAGTTGTCCTTGGCTAC	|||*|||||||||:|||*|*	CCGCTCAACAGGAGCCGTTC								PF12825.4(DUF3818:Domain of unknown function in PX-proteins (DUF3818))			gi|74626312|sp|Q9Y7N9.1|YCKC_SCHPO(RecName: Full=PX domain-containing protein C1450.12)
miR169a-3p	TRINITY_DN87806_c2_g2	2.5	1	20	1025	1044	GGCAAGTTGTCCTTGGCTAC	|:||||||:|*|||||||*|	CTGTTCAATAAGAACCGACG										gi|731350476|ref|XP_010686522.1|( PREDICTED: uncharacterized protein LOC104900724 [Beta vulgaris subsp. vulgaris])	_
miR169y	TRINITY_DN45668_c0_g1	2.5	1	21	16	36	TAGCCATGGATGAATTGCCTG	|||*|||||*|||||||*|||	ATCAGTACCAACTTAACAGAC					K02957	RP-S15Ae, RPS15A	map03010(Ribosome)	PF00410.16(Ribosomal_S8:Ribosomal protein S8)	GO:0005840(cellular_component:ribosome); GO:0003735(molecular_function:structural constituent of ribosome); GO:0006412(biological_process:translation)	gi|219362577|ref|NP_001137078.1|( uncharacterized protein LOC100217251 [Zea mays])	gi|51702132|sp|Q96W54.3|RS22_CANAL(RecName: Full=40S ribosomal protein S22)
miR169y	TRINITY_DN45668_c0_g2	2.5	1	21	16	36	TAGCCATGGATGAATTGCCTG	|||*|||||*|||||||*|||	ATCAGTACCAACTTAACAGAC					K02957	RP-S15Ae, RPS15A	map03010(Ribosome)	PF00410.16(Ribosomal_S8:Ribosomal protein S8)	GO:0004747(molecular_function:ribokinase activity); GO:0006014(biological_process:D-ribose metabolic process); GO:0005840(cellular_component:ribosome); GO:0046835(biological_process:carbohydrate phosphorylation); GO:0003735(molecular_function:structural constituent of ribosome); GO:0006412(biological_process:translation)	gi|219362577|ref|NP_001137078.1|( uncharacterized protein LOC100217251 [Zea mays])	gi|51702132|sp|Q96W54.3|RS22_CANAL(RecName: Full=40S ribosomal protein S22)
miR169y	TRINITY_DN88802_c2_g1	2.5	1	21	1896	1916	TAGCCATGGATGAATTGCCTG	*|||||*||||||*|||||||	TTCGGTTCCTACTCAACGGAC					K08064	NFYA		PF10253.6(PRCC:Mitotic checkpoint regulator, MAD2B-interacting); PF02045.12(CBFB_NFYA:CCAAT-binding transcription factor (CBF-B/NF-YA) subunit B)		gi|902218597|gb|KNA18080.1|( hypothetical protein SOVF_074230 [Spinacia oleracea])	gi|81174954|sp|Q93ZH2.2|NFYA3_ARATH(RecName: Full=Nuclear transcription factor Y subunit A-3; Short=AtNF-YA-3; AltName: Full=Transcriptional activator HAP2C)
miR166i-3p	TRINITY_DN85946_c5_g1	2.5	1	21	4311	4331	TCGGATCAGGCTTCATTCCTC	||::|||||:||||||:*|||	AGTTTAGTCTGAAGTAGTGAG								PF05641.9(Agenet:Agenet domain); PF05266.11(DUF724:Protein of unknown function (DUF724))		gi|870858537|gb|KMT10046.1|( hypothetical protein BVRB_5g122580 isoform A [Beta vulgaris subsp. vulgaris])	gi|75173410|sp|Q9FZD9.1|DUF3_ARATH(RecName: Full=DUF724 domain-containing protein 3; Short=AtDUF3)
miR166i-3p	TRINITY_DN87096_c0_g6	2.5	1	21	1580	1599	TCGGATCAGGCTTCATTCCTC	||::||||||||:||||*|*|	AGTTTAGTCCGAGGTAAAG-G	COG0337(E:Amino acid transport and metabolism )		COG0337(3-dehydroquinate synthase)		K01735	aroB	map00400(Phenylalanine, tyrosine and tryptophan biosynthesis)	PF01761.17(DHQ_synthase:3-dehydroquinate synthase); PF13685.3(Fe-ADH_2:Iron-containing alcohol dehydrogenase); PF00465.16(Fe-ADH:Iron-containing alcohol dehydrogenase)	GO:0005768(cellular_component:endosome); GO:0009423(biological_process:chorismate biosynthetic process); GO:0009073(biological_process:aromatic amino acid family biosynthetic process); GO:0003856(molecular_function:3-dehydroquinate synthase activity); GO:0009570(cellular_component:chloroplast stroma); GO:0005802(cellular_component:trans-Golgi network)	gi|1035927985|gb|OAY57572.1|( hypothetical protein MANES_02G107200 [Manihot esculenta])	gi|597501038|sp|U3KRF2.2|DHQS_ACTCH(RecName: Full=3-dehydroquinate synthase, chloroplastic; Flags: Precursor)
miR166i-3p	TRINITY_DN89556_c0_g1	2.5	1	21	1027	1046	TCGGATCAGGCTTCATTCCTC	|||||||||:*|:||||*|||	AGCCTAGTCTAAGGTAA-GAG	COG5307(R:General function prediction only )		COG5307(and SEC7 domain)		K13462	MIN7		PF01369.17(Sec7:Sec7 domain); PF12783.4(Sec7_N:Guanine nucleotide exchange factor in Golgi transport N-terminal); PF09324.7(DUF1981:Domain of unknown function (DUF1981)); PF16213.2(DCB:Dimerisation and cyclophilin-binding domain of Mon2); PF16206.2(Mon2_C:C-terminal region of Mon2 protein)	GO:0043547(biological_process:positive regulation of GTPase activity); GO:0005086(molecular_function:ARF guanyl-nucleotide exchange factor activity); GO:0032012(biological_process:regulation of ARF protein signal transduction)	gi|731357174|ref|XP_010690067.1|( PREDICTED: brefeldin A-inhibited guanine nucleotide-exchange protein 5 [Beta vulgaris subsp. vulgaris])	gi|449061867|sp|F4IXW2.2|BIG5_ARATH(RecName: Full=Brefeldin A-inhibited guanine nucleotide-exchange protein 5; Short=BIG5; AltName: Full=ARF guanine-nucleotide exchange factor BIG5; AltName: Full=Protein BFA-VISUALIZED ENDOCYTIC TRAFFICKING DEFECTIVE 1; Short=Protein BEN1; AltName: Full=Protein HOPM INTERACTOR 7)
miR399h	TRINITY_DN85792_c0_g1	2.5	1	21	973	993	TGCCAAAGGAGACTTGCCCAG	||||||*|:|||||:||||*|	ACGGTTCCTTCTGAGCGGGCC								PF02042.12(RWP-RK:RWP-RK domain); PF00564.21(PB1:PB1 domain)		gi|902193294|gb|KNA12259.1|( hypothetical protein SOVF_127540 [Spinacia oleracea])	gi|374095497|sp|Q7X9B9.3|NLP2_ARATH(RecName: Full=Protein NLP2; Short=AtNLP2; AltName: Full=NIN-like protein 2; AltName: Full=Nodule inception protein-like protein 2)
miR168b-5p	TRINITY_DN25297_c0_g1	2.5	1	21	191	211	TCGCTTGGTGCAGGTCGGGAA	**|||||||||||*|||||||	CCCGAACCACGTCGAGCCCTT					K11593	ELF2C, AGO		PF12764.4(Gly-rich_Ago1:Glycine-rich region of argonaut)	GO:0003676(molecular_function:nucleic acid binding); GO:0031047(biological_process:gene silencing by RNA)	gi|218191336|gb|EEC73763.1|( hypothetical protein OsI_08429 [Oryza sativa Indica Group])	gi|75122227|sp|Q6EU14.1|AGO1A_ORYSJ(RecName: Full=Protein argonaute 1A; Short=OsAGO1a)
miR168b-5p	TRINITY_DN92955_c1_g2	2.5	1	21	1070	1090	TCGCTTGGTGCAGGTCGGGAA	**|||||||||||*|||||||	TTCGAACCACGTCGAGCCCTT		NOG00694(J:Translation, ribosomal structure and biogenesis )		NOG00694(eukaryotic translation initiation factor 2c)	K11593	ELF2C, AGO		PF02171.14(Piwi:Piwi domain); PF16486.2(ArgoN:N-terminal domain of argonaute); PF02170.19(PAZ:PAZ domain); PF08699.7(ArgoL1:Argonaute linker 1 domain); PF12764.4(Gly-rich_Ago1:Glycine-rich region of argonaut); PF16488.2(ArgoL2:Argonaute linker 2 domain); PF16487.2(ArgoMid:Mid domain of argonaute)	GO:0003676(molecular_function:nucleic acid binding)	gi|731351835|ref|XP_010687235.1|( PREDICTED: protein argonaute 1 [Beta vulgaris subsp. vulgaris])	gi|251764804|sp|Q7XSA2.3|AGO1B_ORYSJ(RecName: Full=Protein argonaute 1B; Short=OsAGO1b)
miR168b-5p	TRINITY_DN93600_c0_g1	2.5	1	21	145	165	TCGCTTGGTGCAGGTCGGGAA	*||||||*||||||||||**|	CGCGAACGACGTCCAGCCGGT								PF06737.11(Transglycosylas:Transglycosylase-like domain)			gi|75461510|sp|Q6M6W5.1|RPF1_CORGL(RecName: Full=Resuscitation-promoting factor Rpf1; Flags: Precursor)
miR172c	TRINITY_DN85359_c0_g1	2.5	1	21	761	780	AGAATCTTGATGATGCTGCAG	||||||:||||:|||*||*||	TCTTAGGACTATTACTAC-TC	COG0417(L:Replication, recombination and repair )		COG0417(DNA polymerase)		K02324	POLE1	map00240(Pyrimidine metabolism); map03410(Base excision repair); map00230(Purine metabolism); map03030(DNA replication); map03420(Nucleotide excision repair)	PF08490.9(DUF1744:Domain of unknown function (DUF1744)); PF03104.16(DNA_pol_B_exo1:DNA polymerase family B, exonuclease domain); PF00136.18(DNA_pol_B:DNA polymerase family B); PF10108.6(DNA_pol_B_exo2:Predicted 3'-5' exonuclease related to the exonuclease domain of PolB); PF13482.3(RNase_H_2:RNase_H superfamily)	GO:0090305(biological_process:nucleic acid phosphodiester bond hydrolysis); GO:0006281(biological_process:DNA repair); GO:0008270(molecular_function:zinc ion binding); GO:0003887(molecular_function:DNA-directed DNA polymerase activity); GO:0006260(biological_process:DNA replication); GO:0003677(molecular_function:DNA binding); GO:0008408(molecular_function:3'-5' exonuclease activity); GO:0008622(…	gi|731349568|ref|XP_010686060.1|( PREDICTED: DNA polymerase epsilon catalytic subunit A [Beta vulgaris subsp. vulgaris])	gi|426019656|sp|F4HW04.1|DPOE1_ARATH(RecName: Full=DNA polymerase epsilon catalytic subunit A; AltName: Full=DNA polymerase 2 a; Short=AtPOL2a; AltName: Full=DNA polymerase II subunit a; AltName: Full=Protein ABA OVERLY SENSITIVE a; AltName: Full=Protein EARLY IN SHORT DAYS 7; AltName: Full=Protein EMBRYO DEFECTIVE 142; AltName: Full=Protein EMBRYO DEFECTIVE 2284; AltName: Full=Protein EMBRYO DEF…
miR172c	TRINITY_DN87750_c2_g4	2.5	1	21	3824	3843	AGAATCTTGATGATGCTGCAG	||||||||||||**||||*||	TCTTAGAACTACCTCGAC-TC	COG0532(J:Translation, ribosomal structure and biogenesis )		COG0532(One of the essential components for the initiation of protein synthesis. Protects formylmethionyl-tRNA from spontaneous hydrolysis and promotes its binding to the 30S ribosomal subunits. Also involved in the hydrolysis of GTP during the formation of the 70S ribosomal complex (By similarity))		K03243	EIF5B	map03013(RNA transport)	PF00009.24(GTP_EFTU:Elongation factor Tu GTP binding domain); PF11987.5(IF-2:Translation-initiation factor 2); PF14578.3(GTP_EFTU_D4:Elongation factor Tu domain 4); PF03144.22(GTP_EFTU_D2:Elongation factor Tu domain 2); PF01926.20(MMR_HSR1:50S ribosome-binding GTPase)	GO:0005622(cellular_component:intracellular); GO:0006412(biological_process:translation); GO:0000166(molecular_function:nucleotide binding); GO:0003924(molecular_function:GTPase activity)	gi|356576051|ref|XP_003556148.1|( PREDICTED: eukaryotic translation initiation factor 5B-like [Glycine max])	gi|1723436|sp|Q10251.1|IF2P_SCHPO(RecName: Full=Eukaryotic translation initiation factor 5B; Short=eIF-5B; AltName: Full=Translation initiation factor IF-2)
miR172c	TRINITY_DN88570_c1_g2	2.5	1	21	1700	1721	AGAATCTTGATGATGCTG-CAG	||||||||||||*|:|||**||	TCTTAGAACTACAATGACCCTC		NOG12842(S:Function unknown )		NOG12842()						gi|731336868|ref|XP_010679487.1|( PREDICTED: uncharacterized protein LOC104894841 [Beta vulgaris subsp. vulgaris])	_
miR172c	TRINITY_DN88691_c3_g3	2.5	1	21	653	673	AGAATCTTGATGATGCTGCAG	||||:|||||:||||||***|	TCTTGGAACTGCTACGAACGC								PF12454.5(Ecm33:GPI-anchored cell wall organization protein); PF01030.21(Recep_L_domain:Receptor L domain)			gi|961512564|sp|D4AZK9.1|ECM33_ARTBC(RecName: Full=Cell surface GPI-anchored protein ARB_01627; Flags: Precursor)
miR172c	TRINITY_DN91640_c2_g2	2.5	1	21	1898	1917	AGAATCTTGATGATGCTGCAG	|:|||||*|||||||||*|*|	TTTTAGACCTACTACGA-GCC										gi|902235692|gb|KNA24039.1|( hypothetical protein SOVF_019360 [Spinacia oleracea])	gi|75274231|sp|Q9LUI2.1|NET1A_ARATH(RecName: Full=Protein NETWORKED 1A)
miR172c	TRINITY_DN92045_c4_g1	2.5	1	21	1176	1196	AGAATCTTGATGATGCTGCAG	||||||:*|||:||||||*||	TCTTAGGCCTATTACGACTTC		NOG02918(O:Posttranslational modification, protein turnover, chaperones )		NOG02918(peroxisomal biogenesis factor)	K13342	PEX5, PXR1	map04146(Peroxisome)	PF00515.25(TPR_1:Tetratricopeptide repeat); PF13414.3(TPR_11:TPR repeat); PF07719.14(TPR_2:Tetratricopeptide repeat); PF13431.3(TPR_17:Tetratricopeptide repeat); PF13181.3(TPR_8:Tetratricopeptide repeat); PF13432.3(TPR_16:Tetratricopeptide repeat); PF13428.3(TPR_14:Tetratricopeptide repeat); PF14559.3(TPR_19:Tetratricopeptide repeat); PF13424.3(TPR_12:Tetratricopeptide repeat); PF13371.3(TPR_9:Te…		gi|731330454|ref|XP_010676141.1|( PREDICTED: peroxisome biogenesis protein 5 [Beta vulgaris subsp. vulgaris])	gi|75334058|sp|Q9FMA3.1|PEX5_ARATH(RecName: Full=Peroxisome biogenesis protein 5; AltName: Full=Peroxin-5; Short=AtPEX5; AltName: Full=Peroxisomal targeting signal type 1 receptor; AltName: Full=Pex5p)
miR172c	TRINITY_DN92505_c1_g2	2.5	1	21	2679	2699	AGAATCTTGATGATGCTGCAG	*||||||||||||*||||**|	ACTTAGAACTACTTCGACAAC								PF06972.8(DUF1296:Protein of unknown function (DUF1296))		gi|902221228|gb|KNA18831.1|( hypothetical protein SOVF_067060 [Spinacia oleracea])	_
miR160b-3p	TRINITY_DN67793_c0_g1	2.5	1	21	683	702	GCGTATGAGGAGCCATGCATA	||*||||||||:|||:|*|||	CGAATACTCCTTGGTGC-TAT					K12124	GI	map04712(Circadian rhythm - plant)		GO:0009409(biological_process:response to cold); GO:0009908(biological_process:flower development); GO:0006355(biological_process:regulation of transcription, DNA-templated); GO:0009637(biological_process:response to blue light); GO:0030154(biological_process:cell differentiation); GO:0010378(biological_process:temperature compensation of the circadian clock); GO:0010218(biological_process:respon…	gi|222617868|gb|EEE54000.1|( hypothetical protein OsJ_00641 [Oryza sativa Japonica Group])	gi|67476983|sp|Q9AWL7.2|GIGAN_ORYSJ(RecName: Full=Protein GIGANTEA)
miR160d-5p	TRINITY_DN85912_c4_g5	2.5	1	21	2049	2068	TGCCTGGCTCCCTGTATGCCA	||||:|||||||||:|:*|*|	ACGGGCCGAGGGACGTG-GCT	COG2939(E:Amino acid transport and metabolism )		COG2939(carboxy-peptidase)		K16296	SCPL-I		PF00450.19(Peptidase_S10:Serine carboxypeptidase)	GO:0004185(molecular_function:serine-type carboxypeptidase activity); GO:0016747(molecular_function:transferase activity, transferring acyl groups other than amino-acyl groups); GO:0005773(cellular_component:vacuole); GO:0019748(biological_process:secondary metabolic process); GO:0005777(cellular_component:peroxisome); GO:0016021(cellular_component:integral component of membrane); GO:0051603(biol…	gi|731335913|ref|XP_010678976.1|( PREDICTED: serine carboxypeptidase-like 20 [Beta vulgaris subsp. vulgaris])	gi|2815493|sp|P07519.4|CBP1_HORVU(RecName: Full=Serine carboxypeptidase 1; AltName: Full=CP-MI; AltName: Full=Carboxypeptidase C; AltName: Full=Serine carboxypeptidase I; Contains: RecName: Full=Serine carboxypeptidase 1 chain A; AltName: Full=Serine carboxypeptidase I chain A; Contains: RecName: Full=Serine carboxypeptidase 1 chain B; AltName: Full=Serine carboxypeptidase I chain B; Flags: Precu…
miR6470	TRINITY_DN135916_c0_g1	2.5	1	21	195	215	CTCTGATATCATATTAAAAAA	*|||:|||*||||||||*|||	TAGATTATTGTATAATTGTTT	COG1958(K:Transcription )		COG1958(small nuclear ribonucleoprotein)		K12624	LSM5	map03018(RNA degradation); map03040(Spliceosome)	PF01423.19(LSM:LSM domain)	GO:0009414(biological_process:response to water deprivation); GO:0009737(biological_process:response to abscisic acid)	gi|595797218|ref|XP_007201247.1|( hypothetical protein PRUPE_ppa013245mg [Prunus persica])	gi|10720081|sp|Q9Y4Y9.3|LSM5_HUMAN(RecName: Full=U6 snRNA-associated Sm-like protein LSm5 >gi|52783752|sp|P62322.2|LSM5_MOUSE RecName: Full=U6 snRNA-associated Sm-like protein LSm5 >gi|75054789|sp|Q5R628.3|LSM5_PONAB RecName: Full=U6 snRNA-associated Sm-like protein LSm5 >gi|116256439|sp|Q2HJH0.3|LSM5_BOVIN RecName: Full=U6 snRNA-associated Sm-like protein LSm5)
miR6470	TRINITY_DN85852_c1_g4	2.5	1	21	630	650	CTCTGATATCATATTAAAAAA	*||:||||||||*|||||*||	AAGGCTATAGTACAATTTATT		NOG155626(R:General function prediction only )		NOG155626()					GO:0016020(cellular_component:membrane)	gi|568875516|ref|XP_006490840.1|( PREDICTED: uncharacterized protein LOC102629142 [Citrus sinensis])	_
miR6470	TRINITY_DN88632_c1_g5	2.5	1	21	434	454	CTCTGATATCATATTAAAAAA	|||||||*|||||||||***|	GAGACTAAAGTATAATTGAGT					K13436	PTI1	map04626(Plant-pathogen interaction)	PF00069.22(Pkinase:Protein kinase domain); PF07714.14(Pkinase_Tyr:Protein tyrosine kinase)	GO:0006468(biological_process:protein phosphorylation); GO:0005524(molecular_function:ATP binding); GO:0004674(molecular_function:protein serine/threonine kinase activity)	gi|731331284|ref|XP_010676583.1|( PREDICTED: pto-interacting protein 1-like [Beta vulgaris subsp. vulgaris])	gi|75319610|sp|Q41328.2|PTI1_SOLLC(RecName: Full=Pto-interacting protein 1; Short=Pti1; AltName: Full=Pto kinase interactor 1)
miR6470	TRINITY_DN89017_c1_g5	2.5	1	21	212	232	CTCTGATATCATATTAAAAAA	||*|||||||||||:||*|*|	GAAACTATAGTATAGTTGTCT					K02919	RP-L36, MRPL36, rpmJ	map03010(Ribosome)	PF00444.15(Ribosomal_L36:Ribosomal protein L36)	GO:0042254(biological_process:ribosome biogenesis); GO:0030529(cellular_component:intracellular ribonucleoprotein complex)	gi|870850792|gb|KMT02858.1|( hypothetical protein BVRB_8g194360 [Beta vulgaris subsp. vulgaris])	gi|122262676|sp|Q035A6.1|RL36_LACC3(RecName: Full=50S ribosomal protein L36 >gi|238693012|sp|B3WAJ5.1|RL36_LACCB RecName: Full=50S ribosomal protein L36)
miR6470	TRINITY_DN89364_c0_g4	2.5	1	21	1327	1347	CTCTGATATCATATTAAAAAA	||||||||:|||||*|||**|	GAGACTATGGTATATTTTAGT					K07408	CYP1A1	map00380(Tryptophan metabolism)	PF00067.19(p450:Cytochrome P450)	GO:0044710(biological_process:single-organism metabolic process); GO:0016020(cellular_component:membrane); GO:0016705(molecular_function:oxidoreductase activity, acting on paired donors, with incorporation or reduction of molecular oxygen); GO:0004497(molecular_function:monooxygenase activity)	gi|356559841|ref|XP_003548205.1|( PREDICTED: cytochrome P450 71A26-like [Glycine max])	gi|5915815|sp|Q42716.1|C71A8_MENPI(RecName: Full=Cytochrome P450 71A8 [Mentha x piperita])
miR6470	TRINITY_DN90697_c0_g1	2.5	1	21	508	528	CTCTGATATCATATTAAAAAA	|||:||||||||||||*||**	GAGGCTATAGTATAATCTTAG	COG1154(H:Coenzyme transport and metabolism )		COG1154(Catalyzes the acyloin condensation reaction between C atoms 2 and 3 of pyruvate and glyceraldehyde 3-phosphate to yield 1-deoxy-D-xylulose-5-phosphate (DXP) (By similarity))		K01662	dxs	map00730(Thiamine metabolism); map00900(Terpenoid backbone biosynthesis)	PF13292.3(DXP_synthase_N:1-deoxy-D-xylulose-5-phosphate synthase); PF02779.21(Transket_pyr:Transketolase, pyrimidine binding domain); PF02780.17(Transketolase_C:Transketolase, C-terminal domain); PF02775.18(TPP_enzyme_C:Thiamine pyrophosphate enzyme, C-terminal TPP binding domain); PF00676.17(E1_dh:Dehydrogenase E1 component); PF00456.18(Transketolase_N:Transketolase, thiamine diphosphate binding…	GO:0008661(molecular_function:1-deoxy-D-xylulose-5-phosphate synthase activity); GO:0016114(biological_process:terpenoid biosynthetic process)	gi|731372387|ref|XP_010666332.1|( PREDICTED: probable 1-deoxy-D-xylulose-5-phosphate synthase, chloroplastic [Beta vulgaris subsp. vulgaris])	gi|30315812|sp|O78328.1|DXS_CAPAN(RecName: Full=Probable 1-deoxy-D-xylulose-5-phosphate synthase, chloroplastic; Short=1-deoxyxylulose-5-phosphate synthase; Short=DXP synthase; Short=DXPS; AltName: Full=CapTKT2; Flags: Precursor)
miR6470	TRINITY_DN91272_c0_g1	2.5	1	21	2889	2909	CTCTGATATCATATTAAAAAA	|||||||||*||||||||***	GAGACTATACTATAATTTGGC								PF02567.13(PhzC-PhzF:Phenazine biosynthesis-like protein)		gi|731346058|ref|XP_010684253.1|( PREDICTED: phenazine biosynthesis-like domain-containing protein 1 isoform X2 [Beta vulgaris subsp. vulgaris])	gi|18203009|sp|Q9I073.1|Y2770_PSEAE(RecName: Full=Uncharacterized isomerase PA2770)
miR6470	TRINITY_DN92262_c2_g1	2.5	1	21	634	655	CTCTGATATCATATTAAA-AAA	||||||||:|||*|||||*|*|	GAGACTATGGTACAATTTATAT								PF13639.3(zf-RING_2:Ring finger domain); PF13923.3(zf-C3HC4_2:Zinc finger, C3HC4 type (RING finger)); PF17123.2(zf-RING_11:RING-like zinc finger); PF12678.4(zf-rbx1:RING-H2 zinc finger domain)	GO:0046872(molecular_function:metal ion binding); GO:0042787(biological_process:protein ubiquitination involved in ubiquitin-dependent protein catabolic process); GO:0000209(biological_process:protein polyubiquitination); GO:0061630(molecular_function:ubiquitin protein ligase activity); GO:0043161(biological_process:proteasome-mediated ubiquitin-dependent protein catabolic process)	gi|731345898|ref|XP_010684164.1|( PREDICTED: E3 ubiquitin-protein ligase SGR9, amyloplastic [Beta vulgaris subsp. vulgaris])	gi|75299582|sp|Q8GXF8.1|SHGR9_ARATH(RecName: Full=E3 ubiquitin-protein ligase SGR9, amyloplastic; AltName: Full=Protein SHOOT GRAVITROPISM 9; Flags: Precursor)
miR6470	TRINITY_DN92394_c1_g1	2.5	1	21	1908	1929	CTCTGATATCATATTAAAA-AA	||||*|||||||*||||||*||	GAGAGTATAGTACAATTTTATT		NOG03956(U:Intracellular trafficking, secretion, and vesicular transport ); NOG21945(U:Intracellular trafficking, secretion, and vesicular transport )		NOG03956(glutamate receptor); NOG21945(Glutamate-gated receptor that probably acts as non- selective cation channel (By similarity))	K05387	GRIP		PF01094.25(ANF_receptor:Receptor family ligand binding region); PF13458.3(Peripla_BP_6:Periplasmic binding protein); PF10613.6(Lig_chan-Glu_bd:Ligated ion channel L-glutamate- and glycine-binding site); PF00497.17(SBP_bac_3:Bacterial extracellular solute-binding proteins, family 3); PF00060.23(Lig_chan:Ligand-gated ion channel)	GO:0006811(biological_process:ion transport); GO:0004970(molecular_function:ionotropic glutamate receptor activity); GO:0016021(cellular_component:integral component of membrane); GO:0035235(biological_process:ionotropic glutamate receptor signaling pathway)	gi|731356359|ref|XP_010689636.1|( PREDICTED: glutamate receptor 3.4-like [Beta vulgaris subsp. vulgaris])	gi|41017203|sp|Q8GXJ4.2|GLR34_ARATH(RecName: Full=Glutamate receptor 3.4; Short=AtGLR4; AltName: Full=Ligand-gated ion channel 3.4; Flags: Precursor)
miR6470	TRINITY_DN92487_c3_g1	2.5	1	21	2448	2469	CTCTGATATCATATTAAAA-AA	||||*||||*|||||||||*||	GAGAATATATTATAATTTTATT								PF14309.3(DUF4378:Domain of unknown function (DUF4378))		gi|870847831|gb|KMT00179.1|( hypothetical protein BVRB_1g019970 [Beta vulgaris subsp. vulgaris])	_
miR6470	TRINITY_DN92985_c2_g4	2.5	1	21	2194	2214	CTCTGATATCATATTAAAAAA	||||||||||||*|*|||*||	GAGACTATAGTACACTTTATT										gi|147823225|emb|CAN68609.1|( hypothetical protein VITISV_012924 [Vitis vinifera])	_
miR1863a	TRINITY_DN87459_c5_g1	2.5	1	24	294	317	AGCTCTGATACCATGTTAGATTAG	*||||||||||*||||||:|||*:	CCGAGACTATGATACAATTTAAGT					K00924	E2.7.1.-		PF00069.22(Pkinase:Protein kinase domain)	GO:0006468(biological_process:protein phosphorylation); GO:0005509(molecular_function:calcium ion binding); GO:0005524(molecular_function:ATP binding); GO:0004674(molecular_function:protein serine/threonine kinase activity)	gi|731338652|ref|XP_010680435.1|( PREDICTED: CDPK-related kinase 5 [Beta vulgaris subsp. vulgaris])	gi|75337058|sp|Q9SCS2.1|CAMK5_ARATH(RecName: Full=CDPK-related kinase 5; Short=AtCRK5; AltName: Full=Calcium/calmodulin-dependent protein kinase 1)
miR1863a	TRINITY_DN88181_c1_g2	2.5	1	24	591	615	AGCTCTGATACCATGTTAGATTA-G	*|||||||||||||||*|:||:|*|	CCGAGACTATGGTACATTTTAGTAC										gi|870863602|gb|KMT14766.1|( hypothetical protein BVRB_4g075320 [Beta vulgaris subsp. vulgaris])	_
miR1863a	TRINITY_DN89601_c0_g2	2.5	1	24	767	789	AGCTCTGATACCATGTTAGATTAG	*||||:|||||||||||*:||:*|	CCGAGGCTATGGTACAAATTAG-C		NOG65731(S:Function unknown )		NOG65731(Yippee-like)				PF03226.11(Yippee-Mis18:Yippee zinc-binding/DNA-binding /Mis18, centromere assembly)		gi|731311200|ref|XP_010694130.1|( PREDICTED: protein yippee-like At4g27745 [Beta vulgaris subsp. vulgaris])	gi|148887462|sp|Q9T096.2|YIPL6_ARATH(RecName: Full=Protein yippee-like At4g27745)
miR1863a	TRINITY_DN92494_c1_g4	2.5	1	24	954	978	AGCTCTGATACCATGTTA-GATTAG	||||*|||||||||||||*|*||*|	TCGATACTATGGTACAATTCAAAAC								PF13966.3(zf-RVT:zinc-binding in reverse transcriptase)		gi|1012324845|gb|KYP36798.1|( hypothetical protein KK1_042036 [Cajanus cajan])	gi|302393805|sp|Q0WV90.3|TPR1_ARATH(RecName: Full=Topless-related protein 1; AltName: Full=Protein MODIFIER OF SNC1 10)
miR1863a	TRINITY_DN92928_c1_g1	2.5	1	24	2820	2843	AGCTCTGATACCATGTTAGATTAG	*|||||||||||||||*|:||:*|	GCGAGACTATGGTACACTTTAGGC								PF07714.14(Pkinase_Tyr:Protein tyrosine kinase); PF00069.22(Pkinase:Protein kinase domain); PF13855.3(LRR_8:Leucine rich repeat); PF12799.4(LRR_4:Leucine Rich repeats (2 copies))		gi|731370275|ref|XP_010665669.1|( PREDICTED: probable LRR receptor-like serine/threonine-protein kinase At1g07650 isoform X5 [Beta vulgaris subsp. vulgaris])	gi|264664462|sp|C0LGE0.1|Y1765_ARATH(RecName: Full=Probable LRR receptor-like serine/threonine-protein kinase At1g07650; Flags: Precursor)
miR172b	TRINITY_DN63446_c0_g2	2.5	1	21	203	223	GGAATCTTGATGATGCTGCAT	:||*:|||||||||||||*|:	TCTGGGAACTACTACGACTTG					K04077	groEL, HSPD1	map03018(RNA degradation)	PF00118.21(Cpn60_TCP1:TCP-1/cpn60 chaperonin family)		gi|694422740|ref|XP_009339195.1|( PREDICTED: LOW QUALITY PROTEIN: ruBisCO large subunit-binding protein subunit beta, chloroplastic-like [Pyrus x bretschneideri])	gi|2506277|sp|P08927.2|RUBB_PEA(RecName: Full=RuBisCO large subunit-binding protein subunit beta, chloroplastic; AltName: Full=60 kDa chaperonin subunit beta; AltName: Full=CPN-60 beta; Flags: Precursor)
miR172b	TRINITY_DN83542_c0_g1	2.5	1	21	1473	1492	GGAATCTTGATGATGCTGCAT	||||||||||||||**|*|||	CCTTAGAACTACTAAAA-GTA								PF00646.30(F-box:F-box domain); PF12937.4(F-box-like:F-box-like)		gi|902229473|gb|KNA21518.1|( hypothetical protein SOVF_042450 [Spinacia oleracea])	gi|75262213|sp|Q9C8Y8.1|FDL7_ARATH(RecName: Full=Putative F-box/FBD/LRR-repeat protein At1g66290)
miR172b	TRINITY_DN84814_c0_g2	2.5	1	21	225	244	GGAATCTTGATGATGCTGCAT	:||||||:||::|||||:*||	TCTTAGAGCTGTTACGAT-TA										gi|731342630|ref|XP_010682491.1|( PREDICTED: uncharacterized protein LOC104897330 [Beta vulgaris subsp. vulgaris])	gi|464866|sp|P34257.1|TC3A_CAEEL(RecName: Full=Transposable element Tc3 transposase)
miR172b	TRINITY_DN86880_c1_g3	2.5	1	21	1465	1484	GGAATCTTGATGATGCTGCAT	|*|||||||||:|||||:*|:	CATTAGAACTATTACGAT-TG		NOG06096(K:Transcription )		NOG06096(Scarecrow-like protein)				PF03514.11(GRAS:GRAS domain family)	GO:0006355(biological_process:regulation of transcription, DNA-templated); GO:0000989(molecular_function:transcription factor activity, transcription factor binding); GO:0005634(cellular_component:nucleus)	gi|731325844|ref|XP_010673719.1|( PREDICTED: scarecrow-like protein 3 [Beta vulgaris subsp. vulgaris])	gi|75177815|sp|Q9LPR8.1|SCL3_ARATH(RecName: Full=Scarecrow-like protein 3; Short=AtSCL3; AltName: Full=GRAS family protein 5; Short=AtGRAS-5)
miR172b	TRINITY_DN87192_c1_g1	2.5	1	21	63	83	GGAATCTTGATGATGCTGCAT	**||||||||||||||||*|*	AGTTAGAACTACTACGACCTT					K12731	DXMT	map00232(Caffeine metabolism)	PF03492.12(Methyltransf_7:SAM dependent carboxyl methyltransferase)		gi|731315120|ref|XP_010689978.1|( PREDICTED: caffeine synthase 1-like [Beta vulgaris subsp. vulgaris])	gi|75117021|sp|Q68CM3.1|TCS2_CAMSI(RecName: Full=Probable caffeine synthase 2 [Camellia sinensis])
miR172b	TRINITY_DN89006_c0_g1	2.5	1	21	1518	1537	GGAATCTTGATGATGCTGCAT	|||||*:||||||||||*|*|	CCTTACGACTACTACGAAG-A	COG2730(G:Carbohydrate transport and metabolism )		COG2730(Glycoside hydrolase Family 5)					PF00150.15(Cellulase:Cellulase (glycosyl hydrolase family 5))	GO:0007015(biological_process:actin filament organization); GO:0004553(molecular_function:hydrolase activity, hydrolyzing O-glycosyl compounds); GO:0005975(biological_process:carbohydrate metabolic process); GO:0051015(molecular_function:actin filament binding)	gi|902197105|gb|KNA13316.1|( hypothetical protein SOVF_115920 [Spinacia oleracea])	gi|294956597|sp|Q5B5X8.2|EXGA_EMENI(RecName: Full=Probable glucan 1,3-beta-glucosidase A; AltName: Full=Exo-1,3-beta-glucanase 1; AltName: Full=Exo-1,3-beta-glucanase A; Flags: Precursor)
miR172b	TRINITY_DN89237_c0_g1	2.5	1	21	4196	4215	GGAATCTTGATGATGCTGCAT	*|||||:||||:||||||**|	ACTTAGGACTATTACGAC-CA								PF01966.19(HD:HD domain)		gi|731342777|ref|XP_010682565.1|( PREDICTED: deoxynucleoside triphosphate triphosphohydrolase SAMHD1 homolog isoform X2 [Beta vulgaris subsp. vulgaris])	gi|223635768|sp|B0G107.1|SAMH1_DICDI(RecName: Full=Deoxynucleoside triphosphate triphosphohydrolase SAMHD1 homolog; Short=dNTPase; AltName: Full=HD phosphohydrolase domain-containing protein)
miR172b	TRINITY_DN92505_c1_g2	2.5	1	21	2680	2699	GGAATCTTGATGATGCTGCAT	*||||||||||||*||||**|	ACTTAGAACTACTTCGAC-AA								PF06972.8(DUF1296:Protein of unknown function (DUF1296))		gi|902221228|gb|KNA18831.1|( hypothetical protein SOVF_067060 [Spinacia oleracea])	_
miR169a	TRINITY_DN88802_c2_g1	2.5	1	21	1895	1916	CAGCCAAGGATGACTTGCC-GA	*||||||||||||*|||||*|*	TTCGGTTCCTACTCAACGGACC					K08064	NFYA		PF10253.6(PRCC:Mitotic checkpoint regulator, MAD2B-interacting); PF02045.12(CBFB_NFYA:CCAAT-binding transcription factor (CBF-B/NF-YA) subunit B)		gi|902218597|gb|KNA18080.1|( hypothetical protein SOVF_074230 [Spinacia oleracea])	gi|81174954|sp|Q93ZH2.2|NFYA3_ARATH(RecName: Full=Nuclear transcription factor Y subunit A-3; Short=AtNF-YA-3; AltName: Full=Transcriptional activator HAP2C)
miR169a	TRINITY_DN90766_c0_g2	2.5	1	21	1480	1499	CAGCCAAGGATGACTTGCCGA	*|||||||||||||||*|*|*	TTCGGTTCCTACTGAA-GACC								PF02213.13(GYF:GYF domain); PF00642.21(zf-CCCH:Zinc finger C-x8-C-x5-C-x3-H type (and similar))	GO:0005488(molecular_function:binding)	gi|902231673|gb|KNA22355.1|( hypothetical protein SOVF_034820 isoform B [Spinacia oleracea])	gi|391358194|sp|Q9SIV5.3|C3H19_ARATH(RecName: Full=Zinc finger CCCH domain-containing protein 19; Short=AtC3H19; AltName: Full=Protein Needed for RDR2-independent DNA methylation)
miR171a	TRINITY_DN81279_c0_g2	2.5	1	21	541	561	TGAGCCGCGCCAATATCACAT	||||||:*:|||||||||*||	ACTCGGTATGGTTATAGTTTA								PF04398.9(DUF538:Protein of unknown function, DUF538)		gi|731365020|ref|XP_010694296.1|( PREDICTED: uncharacterized protein At5g01610 [Beta vulgaris subsp. vulgaris])	gi|75181387|sp|Q9M015.1|Y5161_ARATH(RecName: Full=Uncharacterized protein At5g01610)
miR171a	TRINITY_DN82012_c0_g1	2.5	1	21	22	42	TGAGCCGCGCCAATATCACAT	*||||||||||||:|:||*|*	CCTCGGCGCGGTTGTGGTCTT					K09282	HMGA1					gi|57015348|sp|P17095.4|HMGA1_MOUSE(RecName: Full=High mobility group protein HMG-I/HMG-Y; Short=HMG-I(Y); AltName: Full=High mobility group AT-hook protein 1; Short=High mobility group protein A1)
miR171a	TRINITY_DN87736_c6_g2	2.5	1	21	1518	1539	TGAGCCGCGCCAATATCACA-T	|*|||||*||||||||||||*|	AGTCGGCACGGTTATAGTGTCA	COG2133(G:Carbohydrate transport and metabolism )		COG2133(Dehydrogenase)					PF07995.8(GSDH:Glucose / Sorbosone dehydrogenase)	GO:0016901(molecular_function:oxidoreductase activity, acting on the CH-OH group of donors, quinone or similar compound as acceptor); GO:0055114(biological_process:oxidation-reduction process); GO:0005975(biological_process:carbohydrate metabolic process); GO:0048038(molecular_function:quinone binding)	gi|902207025|gb|KNA15602.1|( hypothetical protein SOVF_096770 [Spinacia oleracea])	gi|34395733|sp|Q9SSG3.2|HIPL1_ARATH(RecName: Full=HIPL1 protein; Flags: Precursor)
miR171a	TRINITY_DN89990_c1_g2	2.5	1	21	1770	1789	TGAGCCGCGCCAATATCACAT	||*|||||:|||||||||**|	ACACGGCGTGGTTATAGT-AA										gi|731332439|ref|XP_010677206.1|( PREDICTED: uncharacterized protein LOC104892884 isoform X1 [Beta vulgaris subsp. vulgaris])	_
miR166b-5p	TRINITY_DN87283_c0_g1	2.5	1	21	1395	1415	GGACTGTTGTCTGGCTCGAGG	|||||:|:|||:|:|||||*|	CCTGATAGCAGGCTGAGCTGC	COG4581(L:Replication, recombination and repair )		COG4581(helicase)		K12599	SKI2, SKIV2L	map03018(RNA degradation)	PF08148.9(DSHCT:DSHCT (NUC185) domain); PF13234.3(rRNA_proc-arch:rRNA-processing arch domain); PF00271.28(Helicase_C:Helicase conserved C-terminal domain); PF00270.26(DEAD:DEAD/DEAH box helicase)	GO:0006401(biological_process:RNA catabolic process); GO:0003724(molecular_function:RNA helicase activity); GO:0003723(molecular_function:RNA binding); GO:0005524(molecular_function:ATP binding)	gi|731348722|ref|XP_010685630.1|( PREDICTED: putative ATP-dependent RNA helicase C550.03c [Beta vulgaris subsp. vulgaris])	gi|817033904|sp|F4JAA5.1|SKI2_ARATH(RecName: Full=DExH-box ATP-dependent RNA helicase DExH11; AltName: Full=AtHELPS; AltName: Full=Protein SKI2 homolog; Short=AtSKI2)
miR169j	TRINITY_DN67793_c0_g1	2.5	1	21	108	128	TAGCCAAGGATGACTTGCCTG	|||**||||||||||||||*|	ATCCTTTCCTACTGAACGGCC					K12124	GI	map04712(Circadian rhythm - plant)		GO:0009409(biological_process:response to cold); GO:0009908(biological_process:flower development); GO:0006355(biological_process:regulation of transcription, DNA-templated); GO:0009637(biological_process:response to blue light); GO:0030154(biological_process:cell differentiation); GO:0010378(biological_process:temperature compensation of the circadian clock); GO:0010218(biological_process:respon…	gi|222617868|gb|EEE54000.1|( hypothetical protein OsJ_00641 [Oryza sativa Japonica Group])	gi|67476983|sp|Q9AWL7.2|GIGAN_ORYSJ(RecName: Full=Protein GIGANTEA)
miR156a-5p	TRINITY_DN69898_c0_g1	2.5	1	20	410	429	TGACAGAAGAGAGTGAGCAC	|*||||||||:||*||||||	AATGTCTTCTTTCTCTCGTG										gi|731324125|ref|XP_010672800.1|( PREDICTED: zinc finger MYM-type protein 1-like [Beta vulgaris subsp. vulgaris])	gi|74743897|sp|Q5SVZ6.1|ZMYM1_HUMAN(RecName: Full=Zinc finger MYM-type protein 1)
miR156a-5p	TRINITY_DN79946_c0_g1	2.5	1	20	512	531	TGACAGAAGAGAGTGAGCAC	||||*|||||||:|:||*||	ACTGCCTTCTCTTATTCTTG					K11592	DICER1, DCR1			GO:0016787(molecular_function:hydrolase activity); GO:0016070(biological_process:RNA metabolic process); GO:1901363(molecular_function:heterocyclic compound binding); GO:0097159(molecular_function:organic cyclic compound binding)	gi|731311031|ref|XP_010686530.1|( PREDICTED: endoribonuclease Dicer homolog 1 [Beta vulgaris subsp. vulgaris])	gi|34922211|sp|Q9SP32.2|DCL1_ARATH(RecName: Full=Endoribonuclease Dicer homolog 1; AltName: Full=Dicer-like protein 1; Short=AtDCL1; AltName: Full=Protein ABNORMAL SUSPENSOR 1; AltName: Full=Protein CARPEL FACTORY; AltName: Full=Protein SHORT INTEGUMENTS 1; AltName: Full=Protein SUSPENSOR 1)
miR156a-5p	TRINITY_DN84267_c0_g1	2.5	1	20	485	504	TGACAGAAGAGAGTGAGCAC	|:*|||||||||||:||||*	ATCGTCTTCTCTCATTCGTA					K10088	OS9	map04141(Protein processing in endoplasmic reticulum)	PF07915.10(PRKCSH:Glucosidase II beta subunit-like protein); PF13015.3(PRKCSH_1:Glucosidase II beta subunit-like protein)		gi|731352995|ref|XP_010687838.1|( PREDICTED: protein OS-9 homolog [Beta vulgaris subsp. vulgaris])	gi|75150972|sp|Q8GWH3.1|OS9_ARATH(RecName: Full=Protein OS-9 homolog; Short=AtOS9; AltName: Full=Protein EMS-MUTAGENIZED BRI1 SUPPRESSOR 6; Flags: Precursor)
miR156a-5p	TRINITY_DN86983_c2_g1	2.5	1	20	1095	1114	TGACAGAAGAGAGTGAGCAC	|:||||||:|||||||:**|	ATTGTCTTTTCTCACTTCAG					K03544	clpX, CLPX				gi|955376483|ref|XP_014624575.1|( PREDICTED: CLP protease regulatory subunit CLPX1, mitochondrial-like isoform X2 [Glycine max])	gi|939319591|sp|F4K7F6.1|CLPX2_ARATH(RecName: Full=CLP protease regulatory subunit CLPX2, mitochondrial; Flags: Precursor)
miR156a-5p	TRINITY_DN87080_c0_g4	2.5	1	20	437	456	TGACAGAAGAGAGTGAGCAC	*:||||||||:|||*|||||	TTTGTCTTCTTTCAATCGTG		NOG12217(I:Lipid transport and metabolism )		NOG12217(phospholipase A2, group XV)	K00679	E2.3.1.158	map00561(Glycerolipid metabolism)	PF02450.12(LCAT:Lecithin:cholesterol acyltransferase)	GO:0016021(cellular_component:integral component of membrane); GO:0008374(molecular_function:O-acyltransferase activity); GO:0006629(biological_process:lipid metabolic process)	gi|731348124|ref|XP_010685335.1|( PREDICTED: phospholipid:diacylglycerol acyltransferase 1-like [Beta vulgaris subsp. vulgaris])	gi|75171814|sp|Q9FNA9.1|PDAT1_ARATH(RecName: Full=Phospholipid:diacylglycerol acyltransferase 1; Short=AtPDAT)
miR156a-5p	TRINITY_DN87520_c1_g2	2.5	1	20	423	441	TGACAGAAGAGAGTGAGCAC	*||*||||:|||||||||*|	CCTCTCTTTTCTCACTCG-G	COG1947(I:Lipid transport and metabolism )		COG1947(Catalyzes the phosphorylation of the position 2 hydroxy group of 4-diphosphocytidyl-2C-methyl-D-erythritol (By similarity))		K00919	ispE	map00900(Terpenoid backbone biosynthesis)	PF00288.23(GHMP_kinases_N:GHMP kinases N terminal domain)	GO:0016310(biological_process:phosphorylation); GO:0016114(biological_process:terpenoid biosynthetic process); GO:0050515(molecular_function:4-(cytidine 5'-diphospho)-2-C-methyl-D-erythritol kinase activity); GO:0005524(molecular_function:ATP binding)	gi|731342158|ref|XP_010682260.1|( PREDICTED: 4-diphosphocytidyl-2-C-methyl-D-erythritol kinase, chloroplastic [Beta vulgaris subsp. vulgaris])	gi|7227898|sp|P93841.1|ISPE_SOLLC(RecName: Full=4-diphosphocytidyl-2-C-methyl-D-erythritol kinase, chloroplastic/chromoplastic; AltName: Full=4-(cytidine-5'-diphospho)-2-C-methyl-D-erythritol kinase; Short=CMK; AltName: Full=Ripening-associated protein pTOM41; Flags: Precursor)
miR156a-5p	TRINITY_DN87820_c3_g2	2.5	1	20	2492	2511	TGACAGAAGAGAGTGAGCAC	|||*||||*||||||||||*	ACTATCTTATCTCACTCGTT	COG0514(L:Replication, recombination and repair )		COG0514(atp-dependent dna helicase)		K10899	RECQL		PF00270.26(DEAD:DEAD/DEAH box helicase); PF00271.28(Helicase_C:Helicase conserved C-terminal domain); PF04851.12(ResIII:Type III restriction enzyme, res subunit); PF16124.2(RecQ_Zn_bind:RecQ zinc-binding); PF09382.7(RQC:RQC domain); PF00570.20(HRDC:HRDC domain)	GO:0008026(molecular_function:ATP-dependent helicase activity); GO:0003676(molecular_function:nucleic acid binding); GO:0005622(cellular_component:intracellular); GO:0005524(molecular_function:ATP binding); GO:0006310(biological_process:DNA recombination)	gi|870860145|gb|KMT11508.1|( hypothetical protein BVRB_5g108290 isoform B [Beta vulgaris subsp. vulgaris])	gi|75334308|sp|Q9FT73.1|MED34_ARATH(RecName: Full=Mediator of RNA polymerase II transcription subunit 34; AltName: Full=ATP-dependent DNA helicase Q-like 2; AltName: Full=RecQ-like protein 2; Short=AtRecQ2; Short=AtRecQl2)
miR156a-5p	TRINITY_DN88782_c0_g1	2.5	1	20	348	367	TGACAGAAGAGAGTGAGCAC	|||||:|||||||*:|||*|	ACTGTTTTCTCTCTTTCGCG								PF00226.28(DnaJ:DnaJ domain)		gi|902227025|gb|KNA20551.1|( hypothetical protein SOVF_051300 [Spinacia oleracea])	gi|67462423|sp|Q9ZSY2.1|DNJ15_ARATH(RecName: Full=Chaperone protein dnaJ 15; Short=AtDjB15; Short=AtJ15; AltName: Full=Protein ALTERED RESPONSE TO GRAVITY; Short=AtARG1)
miR156a-5p	TRINITY_DN89331_c0_g2	2.5	1	20	134	153	TGACAGAAGAGAGTGAGCAC	||||||||:|||:|:|||**	ACTGTCTTTTCTTATTCGAA								PF12507.5(HCMV_UL139:Human Cytomegalovirus UL139 protein); PF06839.9(zf-GRF:GRF zinc finger)		gi|902172082|gb|KNA08077.1|( hypothetical protein SOVF_165950 [Spinacia oleracea])	_
miR156a-5p	TRINITY_DN91053_c3_g3	2.5	1	20	2850	2868	TGACAGAAGAGAGTGAGCAC	*||*||||||||:||||*||	TCTATCTTCTCTTACTC-TG					K17602	YLPM1				gi|902235187|gb|KNA23797.1|( hypothetical protein SOVF_021290 [Spinacia oleracea])	gi|57015374|sp|P49750.3|YLPM1_HUMAN(RecName: Full=YLP motif-containing protein 1; AltName: Full=Nuclear protein ZAP3; AltName: Full=ZAP113)
miR156a-5p	TRINITY_DN92371_c2_g2	2.5	1	20	2046	2065	TGACAGAAGAGAGTGAGCAC	*:||||||:|||:||||*||	TTTGTCTTTTCTTACTCTTG					K08867	WNK, PRKWNK		PF00069.22(Pkinase:Protein kinase domain); PF07714.14(Pkinase_Tyr:Protein tyrosine kinase)	GO:0004672(molecular_function:protein kinase activity); GO:0006468(biological_process:protein phosphorylation); GO:0005524(molecular_function:ATP binding)	gi|731335755|ref|XP_010678882.1|( PREDICTED: probable serine/threonine-protein kinase WNK3 isoform X2 [Beta vulgaris subsp. vulgaris])	gi|75256118|sp|Q6EU49.1|WNK4_ORYSJ(RecName: Full=Probable serine/threonine-protein kinase WNK4; Short=OsWNK4; AltName: Full=Protein kinase with no lysine 4)
miR156a-5p	TRINITY_DN92635_c2_g2	2.5	1	20	481	500	TGACAGAAGAGAGTGAGCAC	||*||||*|||||||||||*	ACCGTCTACTCTCACTCGTT		NOG01817(U:Intracellular trafficking, secretion, and vesicular transport )		NOG01817(Reticulon)	K20721	RTN1		PF02453.14(Reticulon:Reticulon)	GO:0016021(cellular_component:integral component of membrane); GO:0005789(cellular_component:endoplasmic reticulum membrane)	gi|731330927|ref|XP_010676393.1|( PREDICTED: reticulon-like protein B2 [Beta vulgaris subsp. vulgaris])	gi|75209281|sp|Q9SUT9.1|RTNLB_ARATH(RecName: Full=Reticulon-like protein B2; Short=AtRTNLB2; AltName: Full=VirB2-interacting protein 2)
miR156a-5p	TRINITY_DN92984_c1_g2	2.5	1	20	624	642	TGACAGAAGAGAGTGAGCAC	*|||||||||*||||||**|	TCTGTCTTCTATCACTC-AG									GO:0090502(biological_process:RNA phosphodiester bond hydrolysis, endonucleolytic); GO:0005655(cellular_component:nucleolar ribonuclease P complex); GO:0004526(molecular_function:ribonuclease P activity)	gi|1012346439|gb|KYP57631.1|( hypothetical protein KK1_003896 [Cajanus cajan])	gi|13432215|sp|O26355.2|RL7A_METTH(RecName: Full=50S ribosomal protein L7Ae; AltName: Full=Ribosomal protein L8e)
miR156a-5p	TRINITY_DN93018_c2_g1	2.5	1	20	4581	4599	TGACAGAAGAGAGTGAGCAC	|||||||||||||::|*|*|	ACTGTCTTCTCTCGTTAG-G					K01006	ppdK	map00710(Carbon fixation in photosynthetic organisms); map00620(Pyruvate metabolism)	PF04801.10(Sin_N:Sin-like protein conserved region); PF02896.15(PEP-utilizers_C:PEP-utilising enzyme, TIM barrel domain); PF00391.20(PEP-utilizers:PEP-utilising enzyme, mobile domain)	GO:0046872(molecular_function:metal ion binding); GO:0006090(biological_process:pyruvate metabolic process); GO:0050242(molecular_function:pyruvate, phosphate dikinase activity); GO:0016301(molecular_function:kinase activity); GO:0016310(biological_process:phosphorylation); GO:0005524(molecular_function:ATP binding); GO:0009507(cellular_component:chloroplast); GO:0015979(biological_process:photos…	gi|902239717|gb|KNA25684.1|( hypothetical protein SOVF_004270 [Spinacia oleracea])	gi|3024426|sp|Q42910.1|PPDK_MESCR(RecName: Full=Pyruvate, phosphate dikinase, chloroplastic; AltName: Full=Pyruvate, orthophosphate dikinase; Flags: Precursor)
miR160d	TRINITY_DN86715_c5_g3	2.5	1	21	194	215	CGCCTGGCTCCCTGCATGCC-G	|||||||||*||||*|||||*|	GCGGACCGAAGGACATACGGAC										gi|731363367|ref|XP_010693396.1|( PREDICTED: auxin response factor 18-like isoform X2 [Beta vulgaris subsp. vulgaris])	gi|75253259|sp|Q653H7.1|ARFR_ORYSJ(RecName: Full=Auxin response factor 18; AltName: Full=OsARF10)
miR396a-3p	TRINITY_DN70983_c0_g1	2.5	1	21	45	65	GTTCAATAAAGCTGTGGGAAG	||*|*|:||||||||||||||	CACGCTGTTTCGACACCCTTC										gi|747090596|ref|XP_011092992.1|( PREDICTED: uncharacterized protein LOC105173044 [Sesamum indicum])	_
miR396a-3p	TRINITY_DN85587_c3_g1	2.5	1	21	87	107	GTTCAATAAAGCTGTGGGAAG	*:|||||*||||||||||*||	AGAGTTAATTCGACACCCATC					K08341	GABARAP, ATG8, LC3			GO:0006995(biological_process:cellular response to nitrogen starvation); GO:0006914(biological_process:autophagy)	gi|902195277|gb|KNA12788.1|( hypothetical protein SOVF_122750 [Spinacia oleracea])	gi|75133010|sp|Q6Z1D5.1|ATG8C_ORYSJ(RecName: Full=Autophagy-related protein 8C; AltName: Full=Autophagy-related ubiquitin-like modifier ATG8C; Flags: Precursor >gi|147742981|sp|A2YS06.2|ATG8C_ORYSI RecName: Full=Autophagy-related protein 8C; AltName: Full=Autophagy-related ubiquitin-like modifier ATG8C; Flags: Precursor)
miR396a-3p	TRINITY_DN96572_c0_g1	2.5	1	21	124	143	GTTCAATAAAGCTGTGGGAAG	||||||:|||||::||||**|	CAAGTTGTTTCGGTACCC-CC		NOG32405(U:Intracellular trafficking, secretion, and vesicular transport )		NOG32405(Signal sequence receptor, delta)	K04571	SSR4	map04141(Protein processing in endoplasmic reticulum)	PF05404.9(TRAP-delta:Translocon-associated protein, delta subunit precursor (TRAP-delta))			gi|9297050|sp|Q62186.1|SSRD_MOUSE(RecName: Full=Translocon-associated protein subunit delta; Short=TRAP-delta; AltName: Full=Signal sequence receptor subunit delta; Short=SSR-delta; Flags: Precursor)
miR395h	TRINITY_DN101953_c0_g1	2.8	1	21	207	227	ATGAAGTGTTTGGGGGAACTT	|*||||*|||||:|||||||:	TCCTTCTCAAACTCCCTTGAG								PF11754.5(Velvet:Velvet factor)			gi|1008819012|sp|Q5BBX1.2|VOSA_EMENI(RecName: Full=Spore development regulator vosA; AltName: Full=Viability of spores protein A)
miR395h	TRINITY_DN81959_c0_g1	2.8	1	21	1006	1025	ATGAAGTGTTTGGGGGAACTT	*:||||*||||||||||*||:	GGCTTCTCAAACCCCCT-GAG										gi|1021026567|gb|KZM84354.1|( hypothetical protein DCAR_028352 [Daucus carota subsp. sativus])	gi|44888115|sp|P93295.1|M310_ARATH(RecName: Full=Uncharacterized mitochondrial protein AtMg00310; AltName: Full=ORF154)
miR395h	TRINITY_DN83467_c0_g1	2.8	1	21	1893	1913	ATGAAGTGTTTGGGGGAACTT	|||||||||:|:::|||*||:	TACTTCACAGATTTCCTAGAG	COG0388(R:General function prediction only )		COG0388(nitrilase cyanide hydratase and apolipoprotein n-acyltransferase)					PF00795.19(CN_hydrolase:Carbon-nitrogen hydrolase)		gi|902169455|gb|KNA07663.1|( hypothetical protein SOVF_169830 [Spinacia oleracea])	gi|75250257|sp|Q94JV5.1|NILP2_ARATH(RecName: Full=Nitrilase-like protein 2)
miR395h	TRINITY_DN87466_c1_g1	2.8	1	21	1454	1474	ATGAAGTGTTTGGGGGAACTT	||:||||||::||::|||||:	TATTTCACAGGCCTTCTTGAG	COG1024(I:Lipid transport and metabolism )		COG1024(Enoyl-CoA hydratase)		K05605	HIBCH	map00640(Propanoate metabolism); map00280(Valine, leucine and isoleucine degradation); map00410(beta-Alanine metabolism)	PF16113.2(ECH_2:Enoyl-CoA hydratase/isomerase); PF00378.17(ECH_1:Enoyl-CoA hydratase/isomerase)	GO:0003860(molecular_function:3-hydroxyisobutyryl-CoA hydrolase activity)	gi|902209155|gb|KNA16112.1|( hypothetical protein SOVF_092040 isoform A [Spinacia oleracea])	gi|75247660|sp|Q8RXN4.1|HIBC5_ARATH(RecName: Full=3-hydroxyisobutyryl-CoA hydrolase-like protein 2, mitochondrial; Flags: Precursor)
miR395h	TRINITY_DN87608_c1_g6	2.8	1	21	202	222	ATGAAGTGTTTGGGGGAACTT	*|||||:|||||:|::||||:	GACTTCGCAAACTCTTTTGAG					K03403	chlH, bchH	map00860(Porphyrin and chlorophyll metabolism)	PF02514.13(CobN-Mg_chel:CobN/Magnesium Chelatase)	GO:0016851(molecular_function:magnesium chelatase activity); GO:0015995(biological_process:chlorophyll biosynthetic process)	gi|222424848|dbj|BAH20376.1|( AT5G13630 [Arabidopsis thaliana])	gi|75171815|sp|Q9FNB0.1|CHLH_ARATH(RecName: Full=Magnesium-chelatase subunit ChlH, chloroplastic; Short=Mg-chelatase subunit H; AltName: Full=ABA-binding protein; AltName: Full=Mg-protoporphyrin IX chelatase subunit ChlH; AltName: Full=Protein CONDITIONAL CHLORINA; AltName: Full=Protein GENOMES UNCOUPLED 5; AltName: Full=Protein RAPID TRANSPIRATION IN DETACHED LEAVES 1; Flags: Precursor)
miR395h	TRINITY_DN90363_c0_g1	2.8	1	21	3145	3164	ATGAAGTGTTTGGGGGAACTT	|*||||||:|||||:||*||:	TCCTTCACGAACCCTCT-GAG	COG5186(A:RNA processing and modification )		COG5186(polyA polymerase)		K14376	PAP	map03015(mRNA surveillance pathway)	PF04928.14(PAP_central:Poly(A) polymerase central domain); PF04926.12(PAP_RNA-bind:Poly(A) polymerase predicted RNA binding domain); PF01909.20(NTP_transf_2:Nucleotidyltransferase domain); PF12131.5(DUF3586:Protein of unknown function (DUF3586))	GO:0048827(biological_process:phyllome development); GO:0048519(biological_process:negative regulation of biological process); GO:0003723(molecular_function:RNA binding); GO:0006378(biological_process:mRNA polyadenylation); GO:0009908(biological_process:flower development); GO:0004652(molecular_function:polynucleotide adenylyltransferase activity); GO:0005634(cellular_component:nucleus)	gi|902237178|gb|KNA24682.1|( hypothetical protein SOVF_013410 [Spinacia oleracea])	gi|75264043|sp|Q9LMT2.1|PAPS1_ARATH(RecName: Full=Nuclear poly(A) polymerase 1; Short=PAP(I); Short=Poly(A) polymerase I; AltName: Full=Polynucleotide adenylyltransferase 1)
miR395h	TRINITY_DN90363_c0_g2	2.8	1	21	2635	2654	ATGAAGTGTTTGGGGGAACTT	|*||||||:|||||:||*||:	TTCTTCACGAACCCTCT-GAG	COG5186(A:RNA processing and modification )		COG5186(polyA polymerase)		K14376	PAP	map03015(mRNA surveillance pathway)	PF04928.14(PAP_central:Poly(A) polymerase central domain); PF04926.12(PAP_RNA-bind:Poly(A) polymerase predicted RNA binding domain)	GO:0043631(biological_process:RNA polyadenylation); GO:0031123(biological_process:RNA 3'-end processing); GO:0003723(molecular_function:RNA binding); GO:0004652(molecular_function:polynucleotide adenylyltransferase activity); GO:0005634(cellular_component:nucleus)	gi|731324606|ref|XP_010673060.1|( PREDICTED: nuclear poly(A) polymerase 1 [Beta vulgaris subsp. vulgaris])	gi|75264043|sp|Q9LMT2.1|PAPS1_ARATH(RecName: Full=Nuclear poly(A) polymerase 1; Short=PAP(I); Short=Poly(A) polymerase I; AltName: Full=Polynucleotide adenylyltransferase 1)
miR395h	TRINITY_DN90881_c0_g1	2.8	1	21	2314	2334	ATGAAGTGTTTGGGGGAACTT	|||||||*|||::|||||*:|	TACTTCAAAAATTCCCTTCGA					K01180	E3.2.1.6		PF03639.10(Glyco_hydro_81:Glycosyl hydrolase family 81); PF00011.18(HSP20:Hsp20/alpha crystallin family)		gi|731315611|ref|XP_010692260.1|( PREDICTED: endo-1,3(4)-beta-glucanase 2-like [Beta vulgaris subsp. vulgaris])	gi|961512567|sp|D4AZ24.1|ENG1_ARTBC(RecName: Full=Probable endo-1,3(4)-beta-glucanase ARB_01444; Short=Endo-1,3-beta-glucanase; Short=Endo-1,4-beta-glucanase; AltName: Full=Laminarinase; Flags: Precursor)
miR395h	TRINITY_DN91466_c4_g1	2.8	1	21	2911	2930	ATGAAGTGTTTGGGGGAACTT	||||||||*|||:|:|||*|:	TACTTCACTAACTCTCTT-AG		NOG16738(S:Function unknown )		NOG16738(Pentatricopeptide repeat-containing protein)				PF00069.22(Pkinase:Protein kinase domain); PF07714.14(Pkinase_Tyr:Protein tyrosine kinase); PF13041.3(PPR_2:PPR repeat family); PF12854.4(PPR_1:PPR repeat); PF01535.17(PPR:PPR repeat); PF13812.3(PPR_3:Pentatricopeptide repeat domain); PF17177.1(PPR_long:Pentacotripeptide-repeat region of PROPR); PF10037.6(MRP-S27:Mitochondrial 28S ribosomal protein S27); PF14559.3(TPR_19:Tetratricopeptide repeat)…	GO:0016740(molecular_function:transferase activity)	gi|731344235|ref|XP_010683303.1|( PREDICTED: pentatricopeptide repeat-containing protein At1g05670, mitochondrial [Beta vulgaris subsp. vulgaris])	gi|122236365|sp|Q0WVK7.1|PPR12_ARATH(RecName: Full=Pentatricopeptide repeat-containing protein At1g05670, mitochondrial; Flags: Precursor)
miR395h	TRINITY_DN92264_c2_g2	2.8	1	21	1089	1109	ATGAAGTGTTTGGGGGAACTT	|*||||||::||||:|||||:	TTCTTCACGGACCCTCTTGAG	COG0149(G:Carbohydrate transport and metabolism )		COG0149(triosephosphate isomerase)		K01803	TPI, tpiA	map00010(Glycolysis / Gluconeogenesis); map00051(Fructose and mannose metabolism); map00710(Carbon fixation in photosynthetic organisms); map00562(Inositol phosphate metabolism)	PF00121.15(TIM:Triosephosphate isomerase)	GO:0019693(biological_process:ribose phosphate metabolic process); GO:0016853(molecular_function:isomerase activity); GO:0044723(biological_process:single-organism carbohydrate metabolic process); GO:0046496(biological_process:nicotinamide nucleotide metabolic process)	gi|326502178|dbj|BAK06780.1|( predicted protein [Hordeum vulgare subsp. vulgare])	gi|353526354|sp|P17751.4|TPIS_MOUSE(RecName: Full=Triosephosphate isomerase; Short=TIM; AltName: Full=Triose-phosphate isomerase)
miR395h	TRINITY_DN92723_c1_g1	2.8	1	21	3113	3132	ATGAAGTGTTTGGGGGAACTT	|||||||||||*||::|*||:	TACTTCACAAAGCCTTT-GAG	COG0221(C:Energy production and conversion )		COG0221(Pyrophosphate phospho-hydrolase)		K01507	ppa	map00190(Oxidative phosphorylation)	PF00719.16(Pyrophosphatase:Inorganic pyrophosphatase)	GO:0016020(cellular_component:membrane); GO:0016787(molecular_function:hydrolase activity)	gi|703163722|ref|XP_010113422.1|( Soluble inorganic pyrophosphatase [Morus notabilis])	gi|4033424|sp|O48556.1|IPYR_MAIZE(RecName: Full=Soluble inorganic pyrophosphatase; AltName: Full=Pyrophosphate phospho-hydrolase; Short=PPase)
miR160c-3p	TRINITY_DN73095_c1_g1	2.8	1	21	228	248	GCGTGCACGGAGCCAAGCATA	:|:|:|||::||||||||||*	TGTATGTGTTTCGGTTCGTAC					K17991	PXG	map00073(Cutin, suberine and wax biosynthesis)	PF05042.10(Caleosin:Caleosin related protein)		gi|15226103|ref|NP_180896.1|( caleosin 3 [Arabidopsis thaliana])	gi|75097578|sp|O22788.1|PXG3_ARATH(RecName: Full=Probable peroxygenase 3; Short=AtPXG3; AltName: Full=Caleosin-3; AltName: Full=Protein RESPONSIVE TO DESICCATION 20)
miR160c-3p	TRINITY_DN85941_c0_g3	2.8	1	21	166	185	GCGTGCACGGAGCCAAGCATA	:|||||*||||||*|||*|||	TGCACGGGCCTCGATTC-TAT	COG2042(S:Function unknown )		COG2042(pre-rRNA processing protein involved in ribosome biogenesis (By similarity))		K09140	TSR3		PF04034.10(DUF367:Domain of unknown function (DUF367)); PF04068.12(RLI:Possible Fer4-like domain in RNase L inhibitor, RLI)	GO:0006364(biological_process:rRNA processing)	gi|731361200|ref|XP_010692227.1|( PREDICTED: ribosome biogenesis protein TSR3 homolog [Beta vulgaris subsp. vulgaris])	gi|81889001|sp|Q5HZH2.1|TSR3_MOUSE(RecName: Full=Ribosome biogenesis protein TSR3 homolog)
miR159d	TRINITY_DN26748_c0_g2	2.8	1	21	198	218	ATTGGATTGAAGGGAGCTCCG	|:||||||||||:||:|:**|	TGACCTAACTTCTCTTGGTAC					K11262	ACACA	map00640(Propanoate metabolism); map00061(Fatty acid biosynthesis); map00620(Pyruvate metabolism)	PF01039.19(Carboxyl_trans:Carboxyl transferase domain)	GO:0016874(molecular_function:ligase activity); GO:0005488(molecular_function:binding)	gi|326518128|dbj|BAK07316.1|( predicted protein [Hordeum vulgare subsp. vulgare])	gi|1705966|sp|Q00955.2|ACAC_YEAST(RecName: Full=Acetyl-CoA carboxylase; Short=ACC; AltName: Full=Fatty acid synthetase 3; AltName: Full=mRNA transport-defective protein 7; Includes: RecName: Full=Biotin carboxylase)
miR159d	TRINITY_DN86044_c0_g1	2.8	1	21	40	61	ATTGGATTGAAGGGAGCT-CCG	*||||||||||:|||:|:**||	GAACCTAACTTTCCTTGGTAGC								PF13966.3(zf-RVT:zinc-binding in reverse transcriptase)		gi|147815144|emb|CAN67932.1|( hypothetical protein VITISV_013913 [Vitis vinifera])	gi|125987635|sp|P0C2F6.1|RNHX1_ARATH(RecName: Full=Putative ribonuclease H protein At1g65750)
miR159d	TRINITY_DN89893_c1_g1	2.8	1	21	897	917	ATTGGATTGAAGGGAGCTCCG	||||||:|||||||*:|:||*	TAACCTGACTTCCCATGGGGA								PF03634.10(TCP:TCP family transcription factor)		gi|731356574|ref|XP_010689747.1|( PREDICTED: transcription factor TCP4-like [Beta vulgaris subsp. vulgaris])	gi|75157409|sp|Q8LPR5.1|TCP4_ARATH(RecName: Full=Transcription factor TCP4; AltName: Full=Protein MATERNAL EFFECT EMBRYO ARREST 35)
miR159d	TRINITY_DN92231_c1_g6	2.8	1	21	296	316	ATTGGATTGAAGGGAGCTCCG	*|||||||||||:|||**||:	GAACCTAACTTCTCTCCCGGT					K09422	MYBP			GO:0003677(molecular_function:DNA binding)	gi|970029111|ref|XP_015075880.1|( PREDICTED: protein ODORANT1-like [Solanum pennellii])	gi|68052409|sp|Q50EX6.1|ODO1_PETHY(RecName: Full=Protein ODORANT1; AltName: Full=MYB-like protein ODO1)
miR164b	TRINITY_DN81305_c0_g1	2.8	1	21	555	574	TGGAGAAGCAGGGCACGTGCA	:*||||||||||||||*|||*	GGCTCTTCGTCCCGTG-ACGC					K17871	ndh1		PF07992.11(Pyr_redox_2:Pyridine nucleotide-disulphide oxidoreductase)		gi|326491059|dbj|BAK05629.1|( predicted protein [Hordeum vulgare subsp. vulgare])	gi|378548409|sp|F2Z699.1|NDH2_YARLI(RecName: Full=External alternative NADH-ubiquinone oxidoreductase, mitochondrial; AltName: Full=External alternative NADH dehydrogenase; AltName: Full=NADH:ubiquinone reductase (non-electrogenic); Flags: Precursor)
miR164b	TRINITY_DN86188_c2_g1	2.8	1	21	72	91	TGGAGAAGCAGGGCACGTGCA	||||||||*|:|||||::*||	ACCTCTTCTTTCCGTGTG-GT					K03798	ftsH, hflB		PF00004.26(AAA:ATPase family associated with various cellular activities (AAA)); PF06068.10(TIP49:TIP49 C-terminus); PF07728.11(AAA_5:AAA domain (dynein-related subfamily)); PF13245.3(AAA_19:Part of AAA domain); PF05496.9(RuvB_N:Holliday junction DNA helicase ruvB N-terminus); PF01695.14(IstB_IS21:IstB-like ATP binding protein); PF13207.3(AAA_17:AAA domain); PF13191.3(AAA_16:AAA ATPase domain); P…	GO:0004222(molecular_function:metalloendopeptidase activity); GO:0005524(molecular_function:ATP binding); GO:0016021(cellular_component:integral component of membrane); GO:0006508(biological_process:proteolysis); GO:0008270(molecular_function:zinc ion binding)	gi|923625019|ref|XP_013748740.1|( PREDICTED: ATP-dependent zinc metalloprotease FTSH 2, chloroplastic [Brassica napus])	gi|75318709|sp|O80860.1|FTSH2_ARATH(RecName: Full=ATP-dependent zinc metalloprotease FTSH 2, chloroplastic; Short=AtFTSH2; AltName: Full=Protein VARIEGATED 2; Flags: Precursor)
miR164b	TRINITY_DN86757_c0_g4	2.8	1	21	185	206	TGGAGAAGCAGGGCACGT-GCA	||:||||||||||||*|:*||*	ACTTCTTCGTCCCGTACGACGG					K01681	ACO, acnA	map00020(Citrate cycle (TCA cycle)); map00630(Glyoxylate and dicarboxylate metabolism)		GO:0046872(molecular_function:metal ion binding); GO:0016491(molecular_function:oxidoreductase activity); GO:0006099(biological_process:tricarboxylic acid cycle); GO:0051539(molecular_function:4 iron, 4 sulfur cluster binding); GO:0003994(molecular_function:aconitate hydratase activity); GO:0005739(cellular_component:mitochondrion)	gi|326503140|dbj|BAJ99195.1|( predicted protein [Hordeum vulgare subsp. vulgare])	gi|961512531|sp|D4AT77.1|ACON_ARTBC(RecName: Full=Aconitate hydratase, mitochondrial; Short=Aconitase; AltName: Full=Citrate hydro-lyase; Flags: Precursor)
miR164b	TRINITY_DN91651_c2_g5	2.8	1	21	412	431	TGGAGAAGCAGGGCACGTGCA	|:|||||:|||*|||||:*||	ATCTCTTTGTCGCGTGCG-GT	COG0091(J:Translation, ribosomal structure and biogenesis )		COG0091(The globular domain of the protein is located near the polypeptide exit tunnel on the outside of the subunit, while an extended beta-hairpin is found that lines the wall of the exit tunnel in the center of the 70S ribosome (By similarity))		K02880	RP-L17e, RPL17	map03010(Ribosome)	PF00237.16(Ribosomal_L22:Ribosomal protein L22p/L17e)	GO:0003735(molecular_function:structural constituent of ribosome); GO:0015934(cellular_component:large ribosomal subunit); GO:0006412(biological_process:translation)	gi|15223501|ref|NP_174060.1|( 60S ribosomal protein L17-1 [Arabidopsis thaliana])	gi|27734446|sp|Q93VI3.1|RL171_ARATH(RecName: Full=60S ribosomal protein L17-1)
miR156l-5p	TRINITY_DN102679_c0_g1	2.8	1	21	223	243	CGACAGAAGAGAGTGAGCATA	|||||||*|||||*|||*|:|	GCTGTCTCCTCTCCCTCCTGT					K01476	E3.5.3.1, rocF, arg	map00220(Arginine biosynthesis); map00330(Arginine and proline metabolism)	PF00491.18(Arginase:Arginase family)		gi|168070274|ref|XP_001786754.1|( predicted protein [Physcomitrella patens])	gi|51704272|sp|P33280.3|ARGI_NEUCR(RecName: Full=Arginase)
miR156l-5p	TRINITY_DN70816_c0_g1	2.8	1	21	181	201	CGACAGAAGAGAGTGAGCATA	|:||||*|:|||:||||||:|	GTTGTCCTTTCTTACTCGTGT					K07513	ACAA1	map04146(Peroxisome); map00592(alpha-Linolenic acid metabolism); map00280(Valine, leucine and isoleucine degradation); map01040(Biosynthesis of unsaturated fatty acids); map00071(Fatty acid degradation)			gi|545361765|ref|XP_005646163.1|( thiolase [Coccomyxa subellipsoidea C-169])	gi|549077|sp|Q05493.1|THIK_YARLI(RecName: Full=3-ketoacyl-CoA thiolase, peroxisomal; AltName: Full=Acetyl-CoA acyltransferase; AltName: Full=Beta-ketothiolase; AltName: Full=Peroxisomal 3-oxoacyl-CoA thiolase; Flags: Precursor)
miR156l-5p	TRINITY_DN82664_c0_g2	2.8	1	21	393	413	CGACAGAAGAGAGTGAGCATA	*|||||*|||||:|:||||:|	ACTGTCGTCTCTTATTCGTGT								PF01535.17(PPR:PPR repeat); PF13041.3(PPR_2:PPR repeat family); PF12854.4(PPR_1:PPR repeat); PF13812.3(PPR_3:Pentatricopeptide repeat domain)		gi|729460012|ref|XP_010525245.1|( PREDICTED: pentatricopeptide repeat-containing protein At1g62260, mitochondrial-like [Tarenaya hassleriana])	gi|75213324|sp|Q9SY02.1|PP301_ARATH(RecName: Full=Pentatricopeptide repeat-containing protein At4g02750)
miR156l-5p	TRINITY_DN86720_c0_g1	2.8	1	21	700	719	CGACAGAAGAGAGTGAGCATA	*|||||||||:|||:||*|:*	TCTGTCTTCTTTCATTC-TGC								PF03140.12(DUF247:Plant protein of unknown function); PF12911.4(OppC_N:N-terminal TM domain of oligopeptide transport permease C)		gi|1021044323|gb|KZN02104.1|( hypothetical protein DCAR_010858 [Daucus carota subsp. sativus])	gi|75203068|sp|Q9SD53.1|Y3720_ARATH(RecName: Full=UPF0481 protein At3g47200)
miR156l-5p	TRINITY_DN87080_c0_g4	2.8	1	21	436	456	CGACAGAAGAGAGTGAGCATA	*:||||||||:|||*||||:|	TTTGTCTTCTTTCAATCGTGT		NOG12217(I:Lipid transport and metabolism )		NOG12217(phospholipase A2, group XV)	K00679	E2.3.1.158	map00561(Glycerolipid metabolism)	PF02450.12(LCAT:Lecithin:cholesterol acyltransferase)	GO:0016021(cellular_component:integral component of membrane); GO:0008374(molecular_function:O-acyltransferase activity); GO:0006629(biological_process:lipid metabolic process)	gi|731348124|ref|XP_010685335.1|( PREDICTED: phospholipid:diacylglycerol acyltransferase 1-like [Beta vulgaris subsp. vulgaris])	gi|75171814|sp|Q9FNA9.1|PDAT1_ARATH(RecName: Full=Phospholipid:diacylglycerol acyltransferase 1; Short=AtPDAT)
miR156l-5p	TRINITY_DN93655_c0_g1	2.8	1	21	57	76	CGACAGAAGAGAGTGAGCATA	||||||||||||::||*|*:|	GCTGTCTTCTCTTGCT-GAGT					K12826	SF3A2, SAP62	map03040(Spliceosome)		GO:0003676(molecular_function:nucleic acid binding); GO:0005634(cellular_component:nucleus); GO:0008270(molecular_function:zinc ion binding)	gi|612388749|ref|XP_007509895.1|( splicing factor 3A subunit 2 [Bathycoccus prasinos])	gi|74698336|sp|Q9P7L8.1|SAP62_SCHPO(RecName: Full=Pre-mRNA-splicing factor sap62; AltName: Full=Spliceosome-associated protein 62)
miR390b	TRINITY_DN84938_c0_g1	2.8	1	21	575	595	AAGCTCAGGAGGGATAGCGCC	||||||||:|||*||*||:||	TTCGAGTCTTCCATACCGTGG								PF13855.3(LRR_8:Leucine rich repeat); PF12799.4(LRR_4:Leucine Rich repeats (2 copies)); PF00560.30(LRR_1:Leucine Rich Repeat)	GO:0016021(cellular_component:integral component of membrane)	gi|731335599|ref|XP_010678806.1|( PREDICTED: LRR receptor-like serine/threonine-protein kinase GSO1 [Beta vulgaris subsp. vulgaris])	gi|263432299|sp|Q9FIZ3.2|GSO2_ARATH(RecName: Full=LRR receptor-like serine/threonine-protein kinase GSO2; AltName: Full=Protein EMBRYO SAC DEVELOPMENT ARREST 23; AltName: Full=Protein GASSHO 2; Flags: Precursor)
miR390b	TRINITY_DN90504_c0_g1	2.8	1	21	2317	2337	AAGCTCAGGAGGGATAGCGCC	|||*|||||||||||||*:**	TTCCAGTCCTCCCTATCATTC	COG4581(L:Replication, recombination and repair )		COG4581(helicase)		K12598	MTR4, SKIV2L2	map03018(RNA degradation)	PF13234.3(rRNA_proc-arch:rRNA-processing arch domain); PF08148.9(DSHCT:DSHCT (NUC185) domain); PF00270.26(DEAD:DEAD/DEAH box helicase); PF00271.28(Helicase_C:Helicase conserved C-terminal domain)	GO:0005829(cellular_component:cytosol); GO:0003723(molecular_function:RNA binding); GO:0006401(biological_process:RNA catabolic process); GO:0005524(molecular_function:ATP binding); GO:0010093(biological_process:specification of floral organ identity); GO:0005654(cellular_component:nucleoplasm); GO:0003724(molecular_function:RNA helicase activity)	gi|731318182|ref|XP_010669583.1|( PREDICTED: superkiller viralicidic activity 2-like 2 [Beta vulgaris subsp. vulgaris])	gi|75339101|sp|Q9ZVW2.2|HEN2_ARATH(RecName: Full=DExH-box ATP-dependent RNA helicase DExH10; AltName: Full=Protein HUA ENHANCER 2)
miR169d	TRINITY_DN87068_c2_g3	2.8	1	21	162	181	TAGCCAAGGATGAATTGCCGG	*|||||*|||||||||*||:|	TTCGGTACCTACTTAA-GGTC	COG0666(R:General function prediction only )		COG0666(Ankyrin Repeat)					PF12796.4(Ank_2:Ankyrin repeats (3 copies)); PF13637.3(Ank_4:Ankyrin repeats (many copies)); PF13857.3(Ank_5:Ankyrin repeats (many copies)); PF00023.27(Ank:Ankyrin repeat); PF13606.3(Ank_3:Ankyrin repeat)		gi|731350661|ref|XP_010686618.1|( PREDICTED: ankyrin repeat domain-containing protein 2-like [Beta vulgaris subsp. vulgaris])	gi|952543414|sp|Q29Q26.1|AKR2B_ARATH(RecName: Full=Ankyrin repeat domain-containing protein 2B)
miR169d	TRINITY_DN88748_c1_g2	2.8	1	21	991	1011	TAGCCAAGGATGAATTGCCGG	:||||||*:|||||*||||||	GTCGGTTGTTACTTCACGGCC		NOG00419(O:Posttranslational modification, protein turnover, chaperones )		NOG00419(aspartic)	K08245	E3.4.23.40		PF00026.20(Asp:Eukaryotic aspartyl protease); PF14543.3(TAXi_N:Xylanase inhibitor N-terminal); PF03489.14(SapB_2:Saposin-like type B, region 2); PF05184.12(SapB_1:Saposin-like type B, region 1); PF14541.3(TAXi_C:Xylanase inhibitor C-terminal)	GO:0006508(biological_process:proteolysis); GO:0004190(molecular_function:aspartic-type endopeptidase activity); GO:0006629(biological_process:lipid metabolic process)	gi|731351009|ref|XP_010686810.1|( PREDICTED: aspartic proteinase A1-like [Beta vulgaris subsp. vulgaris])	gi|75318541|sp|O65390.1|APA1_ARATH(RecName: Full=Aspartic proteinase A1; Flags: Precursor)
miR399n	TRINITY_DN87862_c1_g1	2.8	1	21	1083	1102	TGCCAAAGGAGAGCTGCCCTA	:||||||||||*||||**|||	GCGGTTTCCTCCCGAC-CGAT		NOG09077(U:Intracellular trafficking, secretion, and vesicular transport )		NOG09077(nuclear pore)	K14306	NUP62, NSP1	map03013(RNA transport)	PF05064.10(Nsp1_C:Nsp1-like C-terminal region); PF13634.3(Nucleoporin_FG:Nucleoporin FG repeat region)	GO:0005829(cellular_component:cytosol); GO:0005643(cellular_component:nuclear pore); GO:0017056(molecular_function:structural constituent of nuclear pore)	gi|902174463|gb|KNA08415.1|( hypothetical protein SOVF_162840 [Spinacia oleracea])	gi|75154161|sp|Q8L7F7.1|NUP62_ARATH(RecName: Full=Nuclear pore complex protein NUP62; AltName: Full=Nucleoporin 62; Short=NP62; AltName: Full=Protein EMBRYO DEFECTIVE 2766)
miR399n	TRINITY_DN92140_c0_g2	2.8	1	21	513	533	TGCCAAAGGAGAGCTGCCCTA	:||||||::|||||:||**||	GCGGTTTTTTCTCGGCGTCAT										gi|731369142|ref|XP_010696456.1|( PREDICTED: uncharacterized protein LOC104908982 [Beta vulgaris subsp. vulgaris])	gi|60392921|sp|P11369.2|LORF2_MOUSE(RecName: Full=LINE-1 retrotransposable element ORF2 protein; Short=ORF2p; AltName: Full=Long interspersed element-1; Short=L1; AltName: Full=Retrovirus-related Pol polyprotein LINE-1; Includes: RecName: Full=Reverse transcriptase; Includes: RecName: Full=Endonuclease)
miR403b	TRINITY_DN85067_c0_g1	2.8	1	21	281	301	TTAGATTCACGCACAAACTCG	|||||||||*|||*||||:*|	AATCTAAGTCCGTCTTTGGAC					K10581	UBE2O	map04120(Ubiquitin mediated proteolysis)	PF00179.23(UQ_con:Ubiquitin-conjugating enzyme)		gi|697171554|ref|XP_009594707.1|( PREDICTED: probable ubiquitin-conjugating enzyme E2 24 [Nicotiana tomentosiformis])	gi|75315951|sp|Q9ZVX1.1|UBC23_ARATH(RecName: Full=Probable ubiquitin-conjugating enzyme E2 23; AltName: Full=E2 ubiquitin-conjugating enzyme 23; AltName: Full=Ubiquitin carrier protein 23)
miR403b	TRINITY_DN89019_c4_g9	2.8	1	21	983	1003	TTAGATTCACGCACAAACTCG	|:*|||||||:|||||||*|:	AGACTAAGTGTGTGTTTGTGT		NOG179271(S:Function unknown )		NOG179271()	K18635	SPR1				gi|1035926870|gb|OAY56457.1|( hypothetical protein MANES_02G018200 [Manihot esculenta])	gi|75156042|sp|Q8LGD1.1|SP1L5_ARATH(RecName: Full=Protein SPIRAL1-like 5)
miR403b	TRINITY_DN91382_c0_g1	2.8	1	21	679	698	TTAGATTCACGCACAAACTCG	|:|:||||||:|||||||**:	AGTTTAAGTGTGTGTTTG-TT					K11864	BRCC3, BRCC36	map03440(Homologous recombination)	PF01398.18(JAB:JAB1/Mov34/MPN/PAD-1 ubiquitin protease)		gi|902237481|gb|KNA24820.1|( hypothetical protein SOVF_012290 [Spinacia oleracea])	gi|82228613|sp|Q4VA72.1|BRCC3_XENTR(RecName: Full=Lys-63-specific deubiquitinase BRCC36; AltName: Full=BRCA1-A complex subunit BRCC36; AltName: Full=BRCA1/BRCA2-containing complex subunit 3; AltName: Full=BRCA1/BRCA2-containing complex subunit 36; AltName: Full=BRISC complex subunit BRCC36)
miR403b	TRINITY_DN91482_c1_g1	2.8	1	21	3056	3076	TTAGATTCACGCACAAACTCG	:||:||:|||*||||||*|||	GATTTAGGTGAGTGTTTTAGC								PF01535.17(PPR:PPR repeat); PF13041.3(PPR_2:PPR repeat family); PF12854.4(PPR_1:PPR repeat); PF13812.3(PPR_3:Pentatricopeptide repeat domain)		gi|902240211|gb|KNA25925.1|( hypothetical protein SOVF_002170 [Spinacia oleracea])	gi|75171532|sp|Q9FLS9.1|PP441_ARATH(RecName: Full=Pentatricopeptide repeat-containing protein At5g61800)
miR2111f	TRINITY_DN85709_c0_g1	2.8	1	21	4196	4217	TAATCTGCATCCTGAGGTT-TA	|||||||*||*||||||||*:|	ATTAGACTTACGACTCCAACGT	COG1204(L:Replication, recombination and repair )		COG1204(helicase)		K18663	ASCC3		PF02889.13(Sec63:Sec63 Brl domain); PF00270.26(DEAD:DEAD/DEAH box helicase); PF04851.12(ResIII:Type III restriction enzyme, res subunit); PF00271.28(Helicase_C:Helicase conserved C-terminal domain); PF13401.3(AAA_22:AAA domain); PF00437.17(T2SSE:Type II/IV secretion system protein)	GO:0003676(molecular_function:nucleic acid binding); GO:0005524(molecular_function:ATP binding); GO:0004386(molecular_function:helicase activity)	gi|731366675|ref|XP_010695198.1|( PREDICTED: activating signal cointegrator 1 complex subunit 3 isoform X1 [Beta vulgaris subsp. vulgaris])	gi|75334138|sp|Q9FNQ1.1|DEXHE_ARATH(RecName: Full=DExH-box ATP-dependent RNA helicase DExH14; AltName: Full=BRR2 homolog C; Short=AtBRR2C; AltName: Full=Pre-mRNA-splicing helicase BRR2C)
miR2111f	TRINITY_DN85754_c7_g1	2.8	1	21	117	137	TAATCTGCATCCTGAGGTTTA	**|||||||||||||:|||:*	TGTAGACGTAGGACTTCAAGA	COG4826(O:Posttranslational modification, protein turnover, chaperones )		COG4826(Serpin peptidase inhibitor, clade)		K03982	SERPINE1, PAI1	map04933(AGE-RAGE signaling pathway in diabetic complications)	PF00079.17(Serpin:Serpin (serine protease inhibitor))		gi|168022081|ref|XP_001763569.1|( predicted protein [Physcomitrella patens])	gi|129576|sp|P05121.1|PAI1_HUMAN(RecName: Full=Plasminogen activator inhibitor 1; Short=PAI; Short=PAI-1; AltName: Full=Endothelial plasminogen activator inhibitor; AltName: Full=Serpin E1; Flags: Precursor)
miR2111f	TRINITY_DN87358_c2_g4	2.8	1	21	1274	1294	TAATCTGCATCCTGAGGTTTA	|||||||||:*||||:|:||*	ATTAGACGTGAGACTTCGAAG								PF12481.5(DUF3700:Aluminium induced protein)		gi|902204736|gb|KNA14959.1|( hypothetical protein SOVF_102570 [Spinacia oleracea])	gi|136452|sp|P24805.1|TSJT1_TOBAC(RecName: Full=Stem-specific protein TSJT1)
miR2111f	TRINITY_DN87360_c0_g1	2.8	1	21	1104	1124	TAATCTGCATCCTGAGGTTTA	||||*||||:||||||:|*:|	ATTAAACGTGGGACTCTACGT	COG1877(G:Carbohydrate transport and metabolism ); COG0380(G:Carbohydrate transport and metabolism )		COG1877(synthase); COG0380(synthase)		K16055	TPS	map00500(Starch and sucrose metabolism)	PF00982.18(Glyco_transf_20:Glycosyltransferase family 20); PF02358.13(Trehalose_PPase:Trehalose-phosphatase)	GO:0003825(molecular_function:alpha,alpha-trehalose-phosphate synthase (UDP-forming) activity); GO:0005992(biological_process:trehalose biosynthetic process)	gi|703094010|ref|XP_010095115.1|( Alpha,alpha-trehalose-phosphate synthase [UDP-forming] 1 [Morus notabilis])	gi|75213463|sp|Q9SYM4.1|TPS1_ARATH(RecName: Full=Alpha,alpha-trehalose-phosphate synthase [UDP-forming] 1; AltName: Full=Trehalose-6-phosphate synthase 1; Short=AtTPS1)
miR2111f	TRINITY_DN87561_c1_g1	2.8	1	21	556	575	TAATCTGCATCCTGAGGTTTA	|||||||||||*|:|:|*:||	ATTAGACGTAGCATTTC-GAT										gi|902174259|gb|KNA08396.1|( hypothetical protein SOVF_163000 isoform A, partial [Spinacia oleracea])	_
miR2111f	TRINITY_DN88592_c2_g4	2.8	1	21	430	449	TAATCTGCATCCTGAGGTTTA	|||||||||||||||:*:**|	ATTAGACGTAGGACTT-GCCT										gi|731328120|ref|XP_010674876.1|( PREDICTED: uncharacterized protein LOC104890957 [Beta vulgaris subsp. vulgaris])	_
miR2111f	TRINITY_DN91784_c0_g1	2.8	1	21	642	662	TAATCTGCATCCTGAGGTTTA	||*|||*||||||||:||:||	ATGAGAAGTAGGACTTCAGAT								PF02631.13(RecX:RecX family)	GO:0006282(biological_process:regulation of DNA repair)	gi|731330387|ref|XP_010676105.1|( PREDICTED: uncharacterized protein LOC104891999 isoform X2 [Beta vulgaris subsp. vulgaris])	gi|37999570|sp|Q87XY8.2|RECX_PSESM(RecName: Full=Regulatory protein RecX)
miR2111f	TRINITY_DN93027_c2_g1	2.8	1	21	159	179	TAATCTGCATCCTGAGGTTTA	:|||||||*||*|:|||||||	GTTAGACGAAGTATTCCAAAT								PF00887.16(ACBP:Acyl CoA binding protein); PF12796.4(Ank_2:Ankyrin repeats (3 copies)); PF13857.3(Ank_5:Ankyrin repeats (many copies)); PF13637.3(Ank_4:Ankyrin repeats (many copies)); PF00023.27(Ank:Ankyrin repeat); PF13606.3(Ank_3:Ankyrin repeat)	GO:0016021(cellular_component:integral component of membrane); GO:0000062(molecular_function:fatty-acyl-CoA binding)	gi|731321536|ref|XP_010671404.1|( PREDICTED: acyl-CoA-binding domain-containing protein 1-like [Beta vulgaris subsp. vulgaris])	gi|75266075|sp|Q9SM23.2|ACBP1_ARATH(RecName: Full=Acyl-CoA-binding domain-containing protein 1; Short=Acyl-CoA binding protein 1)
miR168a	TRINITY_DN120995_c0_g1	2.8	1	21	281	301	TTGCTTGGTGCTGGTCGGGAA	:|||||||||||**||||||*	GACGAACCACGAAGAGCCCTG								PF01095.16(Pectinesterase:Pectinesterase)	GO:0042545(biological_process:cell wall modification); GO:0005618(cellular_component:cell wall); GO:0030599(molecular_function:pectinesterase activity); GO:0016021(cellular_component:integral component of membrane); GO:0045330(molecular_function:aspartyl esterase activity); GO:0004857(molecular_function:enzyme inhibitor activity); GO:0043086(biological_process:negative regulation of catalytic act…	gi|731352529|ref|XP_010687597.1|( PREDICTED: pectinesterase [Beta vulgaris subsp. vulgaris])	gi|332278139|sp|Q7Y201.2|PME13_ARATH(RecName: Full=Probable pectinesterase/pectinesterase inhibitor 13; Includes: RecName: Full=Pectinesterase inhibitor 13; AltName: Full=Pectin methylesterase inhibitor 13; Includes: RecName: Full=Pectinesterase 13; Short=PE 13; AltName: Full=Pectin methylesterase 13; Short=AtPME13)
miR168a	TRINITY_DN81599_c0_g2	2.8	1	21	2643	2663	TTGCTTGGTGCTGGTCGGGAA	||**:|||||||||||||:||	AAAAGACCACGACCAGCCTTT					K02519	infB, MTIF2		PF00009.24(GTP_EFTU:Elongation factor Tu GTP binding domain); PF11987.5(IF-2:Translation-initiation factor 2); PF01926.20(MMR_HSR1:50S ribosome-binding GTPase); PF00071.19(Ras:Ras family); PF04760.12(IF2_N:Translation initiation factor IF-2, N-terminal region); PF03144.22(GTP_EFTU_D2:Elongation factor Tu domain 2)	GO:0006412(biological_process:translation); GO:0000166(molecular_function:nucleotide binding); GO:0003924(molecular_function:GTPase activity); GO:0009507(cellular_component:chloroplast)	gi|731366023|ref|XP_010694841.1|( PREDICTED: translation initiation factor IF-2, chloroplastic [Beta vulgaris subsp. vulgaris])	gi|334302824|sp|Q9SHI1.2|IF2C_ARATH(RecName: Full=Translation initiation factor IF-2, chloroplastic; Flags: Precursor)
miR168a	TRINITY_DN86925_c1_g1	2.8	1	21	162	182	TTGCTTGGTGCTGGTCGGGAA	|||*|||||||||*|||:*||	AACAAACCACGACGAGCTGTT								PF00249.28(Myb_DNA-binding:Myb-like DNA-binding domain)		gi|731343978|ref|XP_010683165.1|( PREDICTED: putative Myb family transcription factor At1g14600 [Beta vulgaris subsp. vulgaris])	gi|1042851638|sp|F4I274.1|PHL8_ARATH(RecName: Full=Myb family transcription factor PHL8; AltName: Full=Protein PHR1-LIKE 8)
miR168a	TRINITY_DN89029_c0_g5	2.8	1	21	819	840	TTGCTTGGTGCTGGTCGG-GAA	|||||||||*||||||::*|*|	AACGAACCAGGACCAGTTCCAT		NOG16209(S:Function unknown )		NOG16209(Protein of unknown function (DUF616))				PF04765.10(DUF616:Protein of unknown function (DUF616))	GO:0016021(cellular_component:integral component of membrane)	gi|731350414|ref|XP_010686493.1|( PREDICTED: uncharacterized protein LOC104900699 [Beta vulgaris subsp. vulgaris])	_
miR5523	TRINITY_DN85432_c0_g1	2.8	1	22	3082	3103	TGAGGAGGAACATATTTACTAG	:||:||||||*|||||:|*|||	GCTTCTCCTTTTATAAGTCATC					K20100	YTHDC1		PF04146.12(YTH:YT521-B-like domain)	GO:0003723(molecular_function:RNA binding)	gi|731331338|ref|XP_010676611.1|( PREDICTED: uncharacterized protein LOC104892387 isoform X2 [Beta vulgaris subsp. vulgaris])	gi|229553918|sp|A9LNK9.1|CPSF_ARATH(RecName: Full=30-kDa cleavage and polyadenylation specificity factor 30; AltName: Full=Protein OXIDATIVE STRESS TOLERANT 6; AltName: Full=Zinc finger CCCH domain-containing protein 11; Short=AtC3H11)
miR5523	TRINITY_DN93182_c1_g1	2.8	1	22	912	933	TGAGGAGGAACATATTTACTAG	|:|*||||||||:||||*|||:	ATTACTCCTTGTGTAAAAGATT										gi|731319450|ref|XP_010670269.1|( PREDICTED: uncharacterized protein LOC104887350 [Beta vulgaris subsp. vulgaris])	_
miR319a	TRINITY_DN86376_c1_g2	2.8	1	21	852	873	TTGGACTGAAGGGAGCTC-CCT	:|:|||||||*|||||||**||	GATCTGACTTACCTCGAGTTGA								PF00400.29(WD40:WD domain, G-beta repeat)	GO:0016021(cellular_component:integral component of membrane)	gi|731361240|ref|XP_010692248.1|( PREDICTED: transducin beta-like protein 2 [Beta vulgaris subsp. vulgaris])	gi|12643953|sp|Q9Y4P3.1|TBL2_HUMAN(RecName: Full=Transducin beta-like protein 2; AltName: Full=WS beta-transducin repeats protein; Short=WS-betaTRP; AltName: Full=Williams-Beuren syndrome chromosomal region 13 protein)
miR319a	TRINITY_DN90820_c5_g3	2.8	1	21	1158	1179	TTGGACTGAAGGGAGCTC-CCT	:|||||||||*||||||***||	GACCTGACTTACCTCGACTTGA									GO:0005634(cellular_component:nucleus)	gi|902143375|gb|KNA04841.1|( hypothetical protein SOVF_195990 [Spinacia oleracea])	_
miR319a	TRINITY_DN91386_c1_g2	2.8	1	21	453	472	TTGGACTGAAGGGAGCTCCCT	:*||||||||||:||||**||	GTCCTGACTTCCTTCGA-CGA					K20241	WDR44, RAB11BP		PF05032.9(Spo12:Spo12 family)		gi|731333705|ref|XP_010677871.1|( PREDICTED: WD repeat-containing protein 44 [Beta vulgaris subsp. vulgaris])	_
miR160g	TRINITY_DN114288_c0_g1	2.8	1	21	189	208	TGCCTGGCTCCTTGTATGCCA	:|*|||:|||||:||||*|||	GCTGACTGAGGAGCATA-GGT					K15116	SLC25A33_36, RIM2		PF00153.24(Mito_carr:Mitochondrial carrier protein)		gi|992272446|gb|KXG32562.1|( hypothetical protein SORBI_003G1696001 [Sorghum bicolor])	gi|74665368|sp|Q9P6L7.1|YKQ9_SCHPO(RecName: Full=Uncharacterized mitochondrial carrier C688.09)
miR160g	TRINITY_DN143695_c0_g1	2.8	1	21	65	85	TGCCTGGCTCCTTGTATGCCA	:|||:|||||||||:*:||||	GCGGGCCGAGGAACGCGCGGT								PF03401.11(TctC:Tripartite tricarboxylate transporter family receptor)	GO:0016020(cellular_component:membrane)	gi|1009179090|ref|XP_015870891.1|( PREDICTED: UPF0065 protein in tcbD-tcbE intergenic region-like [Ziziphus jujuba])	gi|408407556|sp|B3EWP1.1|YCLC_PSEAI(RecName: Full=UPF0065 protein in clcB-clcD intergenic region [Pseudomonas aeruginosa])
miR160g	TRINITY_DN85327_c2_g1	2.8	1	21	1212	1231	TGCCTGGCTCCTTGTATGCCA	::|||||*|||||||||**||	GTGGACCTAGGAACATA-AGT	COG0439(I:Lipid transport and metabolism )		COG0439(acetyl-CoA carboxylase biotin carboxylase)		K01961	accC	map00640(Propanoate metabolism); map00061(Fatty acid biosynthesis); map00620(Pyruvate metabolism)	PF02786.14(CPSase_L_D2:Carbamoyl-phosphate synthase L chain, ATP binding domain); PF00289.19(Biotin_carb_N:Biotin carboxylase, N-terminal domain); PF02785.16(Biotin_carb_C:Biotin carboxylase C-terminal domain); PF02222.19(ATP-grasp:ATP-grasp domain); PF15632.3(ATPgrasp_Ter:ATP-grasp in the biosynthetic pathway with Ter operon); PF07478.10(Dala_Dala_lig_C:D-ala D-ala ligase C-terminus); PF08443.8(…	GO:0003989(molecular_function:acetyl-CoA carboxylase activity); GO:0006633(biological_process:fatty acid biosynthetic process); GO:0046872(molecular_function:metal ion binding); GO:2001295(biological_process:malonyl-CoA biosynthetic process); GO:0005524(molecular_function:ATP binding); GO:0004075(molecular_function:biotin carboxylase activity); GO:0009507(cellular_component:chloroplast)	gi|902221592|gb|KNA18951.1|( hypothetical protein SOVF_065980 [Spinacia oleracea])	gi|586830435|sp|B9N843.2|ACCC2_POPTR(RecName: Full=Biotin carboxylase 2, chloroplastic; AltName: Full=Acetyl-CoA carboxylase subunit A 2; Short=ACC; Flags: Precursor)
miR160g	TRINITY_DN89888_c0_g1	2.8	1	21	3419	3440	TGCCTGGCTCCTTGTATGC-CA	|:||:|||||||:||||:|*|*	ATGGGCCGAGGAGCATATGAGC	COG5102(U:Intracellular trafficking, secretion, and vesicular transport )		COG5102(transport protein)					PF04178.9(Got1:Got1/Sft2-like family); PF13639.3(zf-RING_2:Ring finger domain); PF17123.2(zf-RING_11:RING-like zinc finger); PF12678.4(zf-rbx1:RING-H2 zinc finger domain); PF14634.3(zf-RING_5:zinc-RING finger domain); PF13445.3(zf-RING_UBOX:RING-type zinc-finger); PF00097.22(zf-C3HC4:Zinc finger, C3HC4 type (RING finger)); PF12861.4(zf-ANAPC11:Anaphase-promoting complex subunit 11 RING-H2 finger)…	GO:0006810(biological_process:transport); GO:0016020(cellular_component:membrane)	gi|731321654|ref|XP_010671470.1|( PREDICTED: vesicle transport protein SFT2B [Beta vulgaris subsp. vulgaris])	gi|74754426|sp|O95562.1|SFT2B_HUMAN(RecName: Full=Vesicle transport protein SFT2B; AltName: Full=SFT2 domain-containing protein 2)
miR160g	TRINITY_DN90904_c1_g4	2.8	1	21	325	344	TGCCTGGCTCCTTGTATGCCA	|||||:||||||||:|*:|*|	ACGGATCGAGGAACGT-TGCT	COG0100(J:Translation, ribosomal structure and biogenesis )		COG0100(Located on the platform of the 30S subunit, it bridges several disparate RNA helices of the 16S rRNA. Forms part of the Shine-Dalgarno cleft in the 70S ribosome (By similarity))		K02955	RP-S14e, RPS14	map03010(Ribosome)	PF00411.16(Ribosomal_S11:Ribosomal protein S11)	GO:0005840(cellular_component:ribosome); GO:0003735(molecular_function:structural constituent of ribosome); GO:0006412(biological_process:translation)	gi|573939692|ref|XP_006652265.1|( PREDICTED: 40S ribosomal protein S14-like [Oryza brachyantha])	gi|44888985|sp|P19115.2|RS14_NEUCR(RecName: Full=40S ribosomal protein S14; AltName: Full=CRP2)
miR395c	TRINITY_DN89862_c3_g1	2.8	1	21	2567	2587	CTGAAGTGTTTGGGGGGACTC	|||||:||||||:||*||*:|	GACTTTACAAACTCCACTTGG		NOG121963(S:Function unknown )		NOG121963(Pfam:MuDR)				PF03108.12(DBD_Tnp_Mut:MuDR family transposase); PF10551.6(MULE:MULE transposase domain); PF04434.14(SWIM:SWIM zinc finger); PF00579.22(tRNA-synt_1b:tRNA synthetases class I (W and Y))	GO:0008270(molecular_function:zinc ion binding)	gi|731326785|ref|XP_010674195.1|( PREDICTED: uncharacterized protein LOC104890414 [Beta vulgaris subsp. vulgaris])	gi|75337542|sp|Q9SR15.1|SYWC_ARATH(RecName: Full=Tryptophan--tRNA ligase, cytoplasmic; AltName: Full=Tryptophanyl-tRNA synthetase; Short=TrpRS)
miR396g-5p	TRINITY_DN129267_c0_g1	2.8	1	21	27	46	TTCCACGGCTTTCTTGAACTT	||||*||||||:||:||*|:|	AAGGAGCCGAAGGAGCT-GGA					K00013	hisD	map00340(Histidine metabolism)	PF00815.17(Histidinol_dh:Histidinol dehydrogenase)	GO:0005488(molecular_function:binding); GO:0044710(biological_process:single-organism metabolic process); GO:0009536(cellular_component:plastid)	gi|168051375|ref|XP_001778130.1|( predicted protein [Physcomitrella patens])	gi|123178|sp|P24226.1|HISX_BRAOC(RecName: Full=Histidinol dehydrogenase, chloroplastic; Short=HDH; Flags: Precursor [Brassica oleracea var. capitata])
miR396g-5p	TRINITY_DN135941_c0_g1	2.8	1	21	193	213	TTCCACGGCTTTCTTGAACTT	:||||||||:|:|:||||**|	GAGGTGCCGGAGGGACTTCCA					K09843	E1.14.13.93	map00906(Carotenoid biosynthesis)	PF00067.19(p450:Cytochrome P450)	GO:0016132(biological_process:brassinosteroid biosynthetic process); GO:0016021(cellular_component:integral component of membrane); GO:0055114(biological_process:oxidation-reduction process); GO:0010295(molecular_function:(+)-abscisic acid 8'-hydroxylase activity); GO:0010268(biological_process:brassinosteroid homeostasis); GO:0007275(biological_process:multicellular organism development); GO:004…	gi|937905441|dbj|BAS80495.1|( Os02g0703700 [Oryza sativa Japonica Group])	gi|122163981|sp|Q05JG2.1|ABAH1_ORYSJ(RecName: Full=Abscisic acid 8'-hydroxylase 1; Short=ABA 8'-hydroxylase 1; AltName: Full=Cytochrome P450 707A5; AltName: Full=OsABA8ox1 >gi|122166104|sp|Q09J79.1|ABAH1_ORYSI RecName: Full=Abscisic acid 8'-hydroxylase 1; Short=ABA 8'-hydroxylase 1; AltName: Full=Cytochrome P450 707A5; AltName: Full=OsABA8ox1)
miR396g-5p	TRINITY_DN2552_c0_g1	2.8	1	21	40	60	TTCCACGGCTTTCTTGAACTT	*|*||||||||||:|||*|:|	CAAGTGCCGAAAGGACTAGGA								PF01061.21(ABC2_membrane:ABC-2 type transporter)			gi|5921714|sp|O74676.1|CDR4_CANAX(RecName: Full=ABC transporter CDR4)
miR396g-5p	TRINITY_DN617_c0_g1	2.8	1	21	264	284	TTCCACGGCTTTCTTGAACTT	*||*||||||||||||*|||:	CAGTTGCCGAAAGAACCTGAG					K01872	AARS, alaS	map00970(Aminoacyl-tRNA biosynthesis)			gi|303282971|ref|XP_003060777.1|( alanyl-tRNA synthetase [Micromonas pusilla CCMP1545])	gi|313471806|sp|Q5AQL1.2|SYA_EMENI(RecName: Full=Alanine--tRNA ligase; AltName: Full=Alanyl-tRNA synthetase; Short=AlaRS)
miR396g-5p	TRINITY_DN84897_c0_g1	2.8	1	21	99	119	TTCCACGGCTTTCTTGAACTT	:*||||:||||:||||||*||	GTGGTGTCGAAGGAACTTAAA					K02926	RP-L4, MRPL4, rplD	map03010(Ribosome)				gi|1710566|sp|P51998.1|RL4P_YEAST(RecName: Full=54S ribosomal protein YmL6, mitochondrial; Flags: Precursor)
miR396g-5p	TRINITY_DN86047_c0_g3	2.8	1	21	110	130	TTCCACGGCTTTCTTGAACTT	*||||||||||||||:**||:	TAGGTGCCGAAAGAATCCGAG										gi|870840842|gb|KMS94925.1|( hypothetical protein BVRB_014080 [Beta vulgaris subsp. vulgaris])	_
miR396g-5p	TRINITY_DN86509_c3_g2	2.8	1	21	209	229	TTCCACGGCTTTCTTGAACTT	|:||||:|||||*||||||:*	AGGGTGTCGAAATAACTTGGT										gi|694404587|ref|XP_009377167.1|( PREDICTED: serine/threonine-protein phosphatase 7 long form homolog [Pyrus x bretschneideri])	_
miR396g-5p	TRINITY_DN87128_c1_g2	2.8	1	21	351	370	TTCCACGGCTTTCTTGAACTT	||||||:|||||*|:||*||:	AAGGTGTCGAAAAAGCT-GAG	COG0534(V:Defense mechanisms )		COG0534(Mate efflux family protein)		K03327	TC.MATE, SLC47A, norM, mdtK, dinF		PF01554.15(MatE:MatE)	GO:0006855(biological_process:drug transmembrane transport); GO:0016021(cellular_component:integral component of membrane); GO:0015297(molecular_function:antiporter activity); GO:0015238(molecular_function:drug transmembrane transporter activity)	gi|731314150|ref|XP_010684414.1|( PREDICTED: protein TRANSPARENT TESTA 12 [Beta vulgaris subsp. vulgaris])	gi|75213193|sp|Q9SX83.1|DTX33_ARATH(RecName: Full=Protein DETOXIFICATION 33; Short=AtDTX33; AltName: Full=Multidrug and toxic compound extrusion protein 33; Short=MATE protein 33)
miR396g-5p	TRINITY_DN88881_c1_g7	2.8	1	21	1026	1047	TTCCACGGCTTTCTTGAACT-T	:||||*:||:||||||||||*|	GAGGTCTCGGAAGAACTTGACA	COG0513(L:Replication, recombination and repair )		COG0513(atp-dependent rna helicase)		K17679	MSS116		PF00270.26(DEAD:DEAD/DEAH box helicase); PF00271.28(Helicase_C:Helicase conserved C-terminal domain); PF04851.12(ResIII:Type III restriction enzyme, res subunit); PF16203.2(ERCC3_RAD25_C:ERCC3/RAD25/XPB C-terminal helicase)	GO:0003676(molecular_function:nucleic acid binding); GO:0005524(molecular_function:ATP binding); GO:0004386(molecular_function:helicase activity)	gi|297745425|emb|CBI40505.3|( unnamed protein product [Vitis vinifera])	gi|109893656|sp|Q9FFQ1.2|RH31_ARATH(RecName: Full=DEAD-box ATP-dependent RNA helicase 31)
miR396g-5p	TRINITY_DN89346_c6_g1	2.8	1	21	1216	1236	TTCCACGGCTTTCTTGAACTT	:||*||:||||:||||||*||	GAGTTGTCGAAGGAACTTTAA	COG0572(F:Nucleotide transport and metabolism )		COG0572(uridine kinase)					PF00485.15(PRK:Phosphoribulokinase / Uridine kinase family); PF01928.18(CYTH:CYTH domain)	GO:0016301(molecular_function:kinase activity); GO:0016310(biological_process:phosphorylation); GO:0009814(biological_process:defense response, incompatible interaction); GO:0005524(molecular_function:ATP binding); GO:0016462(molecular_function:pyrophosphatase activity); GO:0016021(cellular_component:integral component of membrane)	gi|731340284|ref|XP_010681314.1|( PREDICTED: uridine-cytidine kinase C [Beta vulgaris subsp. vulgaris])	gi|74854653|sp|Q54R62.1|UCKC_DICDI(RecName: Full=Uridine-cytidine kinase C; AltName: Full=Cytidine monophosphokinase C; AltName: Full=Uridine monophosphokinase C)
miR396g-5p	TRINITY_DN90539_c2_g2	2.8	1	21	1459	1479	TTCCACGGCTTTCTTGAACTT	|||*|||||*||||||||*|:	AAGCTGCCGTAAGAACTTTAG		NOG04130(T:Signal transduction mechanisms )		NOG04130(serine threonine-protein kinase)	K14500	BSK	map04075(Plant hormone signal transduction)	PF07714.14(Pkinase_Tyr:Protein tyrosine kinase); PF00069.22(Pkinase:Protein kinase domain)	GO:0006468(biological_process:protein phosphorylation); GO:0004672(molecular_function:protein kinase activity); GO:0005524(molecular_function:ATP binding); GO:0009742(biological_process:brassinosteroid mediated signaling pathway); GO:0005886(cellular_component:plasma membrane)	gi|902227336|gb|KNA20646.1|( hypothetical protein SOVF_050430 isoform B [Spinacia oleracea])	gi|75331881|sp|Q944A7.1|Y4523_ARATH(RecName: Full=Probable serine/threonine-protein kinase At4g35230)
miR396g-5p	TRINITY_DN92316_c0_g1	2.8	1	21	1991	2011	TTCCACGGCTTTCTTGAACTT	:||||||||:|||*|||**||	GAGGTGCCGGAAGTACTACAA		NOG02555(U:Intracellular trafficking, secretion, and vesicular transport )		NOG02555(Coatomer protein complex subunit alpha)	K05236	COPA, RET1		PF06957.8(COPI_C:Coatomer (COPI) alpha subunit C-terminus); PF04053.11(Coatomer_WDAD:Coatomer WD associated region); PF00400.29(WD40:WD domain, G-beta repeat); PF12894.4(ANAPC4_WD40:Anaphase-promoting complex subunit 4 WD40 domain)	GO:0000139(cellular_component:Golgi membrane); GO:0006891(biological_process:intra-Golgi vesicle-mediated transport); GO:0006890(biological_process:retrograde vesicle-mediated transport, Golgi to ER); GO:0006886(biological_process:intracellular protein transport); GO:0006888(biological_process:ER to Golgi vesicle-mediated transport); GO:0030126(cellular_component:COPI vesicle coat); GO:0005198(mo…	gi|731358544|ref|XP_010690807.1|( PREDICTED: coatomer subunit alpha-1 [Beta vulgaris subsp. vulgaris])	gi|146286088|sp|Q94A40.2|COPA1_ARATH(RecName: Full=Coatomer subunit alpha-1; AltName: Full=Alpha-coat protein 1; Short=Alpha-COP 1)
miR396g-5p	TRINITY_DN93058_c1_g1	2.8	1	21	933	953	TTCCACGGCTTTCTTGAACTT	:||||*|||||||||:|**||	GAGGTACCGAAAGAATTATAA										gi|731321100|ref|XP_010671167.1|( PREDICTED: uncharacterized protein LOC104888043 isoform X2 [Beta vulgaris subsp. vulgaris])	_
miR166e-5p	TRINITY_DN80375_c0_g1	2.8	1	21	366	386	GGAATGTTGGCTGGCTCGAGG	:||||:|*|||||||||||**	TCTTATACCCGACCGAGCTAA								PF13966.3(zf-RVT:zinc-binding in reverse transcriptase)		gi|902153817|gb|KNA05744.1|( hypothetical protein SOVF_187600 [Spinacia oleracea])	_
miR166e-5p	TRINITY_DN86166_c1_g5	2.8	1	21	433	453	GGAATGTTGGCTGGCTCGAGG	:|||*|:|||||||*||||||	TCTTCCGACCGACCAAGCTCC	COG0183(I:Lipid transport and metabolism )		COG0183(acetyl-coa acetyltransferase)		K07513	ACAA1	map04146(Peroxisome); map00592(alpha-Linolenic acid metabolism); map00280(Valine, leucine and isoleucine degradation); map01040(Biosynthesis of unsaturated fatty acids); map00071(Fatty acid degradation)	PF00108.20(Thiolase_N:Thiolase, N-terminal domain); PF02803.15(Thiolase_C:Thiolase, C-terminal domain); PF08545.7(ACP_syn_III:3-Oxoacyl-[acyl-carrier-protein (ACP)] synthase III)	GO:0016740(molecular_function:transferase activity)	gi|685351279|ref|XP_009111084.1|( PREDICTED: 3-ketoacyl-CoA thiolase 1, peroxisomal [Brassica rapa])	gi|73919870|sp|Q8LF48.2|THIK1_ARATH(RecName: Full=3-ketoacyl-CoA thiolase 1, peroxisomal; AltName: Full=Acetyl-CoA acyltransferase 1; AltName: Full=Beta-ketothiolase 1; AltName: Full=Peroxisomal 3-oxoacyl-CoA thiolase 1; Flags: Precursor)
miR166e-5p	TRINITY_DN89025_c4_g2	2.8	1	21	228	248	GGAATGTTGGCTGGCTCGAGG	:|||:|||::*||||||||||	TCTTGCAATTCACCGAGCTCC					K03235	EF3, TEF3		PF00005.24(ABC_tran:ABC transporter); PF02463.16(SMC_N:RecF/RecN/SMC N terminal domain); PF13304.3(AAA_21:AAA domain, putative AbiEii toxin, Type IV TA system)	GO:0016887(molecular_function:ATPase activity); GO:0005524(molecular_function:ATP binding)	gi|326498279|dbj|BAJ98567.1|( predicted protein [Hordeum vulgare subsp. vulgare])	gi|1706591|sp|P53978.2|EF3B_YEAST(RecName: Full=Elongation factor 3B; Short=EF-3B; AltName: Full=Homolog of EF-3; AltName: Full=Translation elongation factor 3B)
miR398a-3p	TRINITY_DN89999_c0_g1	2.8	1	21	2416	2437	TGTGTTCTCAGGTCACCC-CTT	||||||||*||*||||||*||:	ACACAAGATTCGAGTGGGTGAG		NOG01639(U:Intracellular trafficking, secretion, and vesicular transport )		NOG01639(solute carrier family 4)				PF00955.18(HCO3_cotransp:HCO3- transporter family)	GO:0016021(cellular_component:integral component of membrane); GO:0005452(molecular_function:inorganic anion exchanger activity); GO:0015698(biological_process:inorganic anion transport)	gi|731336795|ref|XP_010679449.1|( PREDICTED: probable boron transporter 2 [Beta vulgaris subsp. vulgaris])	gi|75182036|sp|Q9M1P7.1|BOR2_ARATH(RecName: Full=Probable boron transporter 2)
miR398a-3p	TRINITY_DN91414_c0_g1	2.8	1	21	61	82	TGTGTTCTCAGGTCACCC-CTT	*|||||||*|:|||||||*||:	CCACAAGATTTCAGTGGGTGAG									GO:0004842(molecular_function:ubiquitin-protein transferase activity); GO:0019005(cellular_component:SCF ubiquitin ligase complex); GO:0031146(biological_process:SCF-dependent proteasomal ubiquitin-dependent protein catabolic process)	gi|731344408|ref|XP_010683401.1|( PREDICTED: F-box protein CPR30-like [Beta vulgaris subsp. vulgaris])	gi|75219622|sp|O49421.1|FB238_ARATH(RecName: Full=F-box protein At4g19940)
miR319a-3p.2-3p	TRINITY_DN142347_c0_g1	2.8	1	20	110	129	TTGGACTGAAGGGTGCTCCC	:|||||:*|||*||||||||	GACCTGGATTCGCACGAGGG					K03178	UBE1, UBA1	map04120(Ubiquitin mediated proteolysis)	PF10585.6(UBA_e1_thiolCys:Ubiquitin-activating enzyme active site)	GO:0008641(molecular_function:small protein activating enzyme activity); GO:0044267(biological_process:cellular protein metabolic process); GO:0044424(cellular_component:intracellular part)	gi|168060305|ref|XP_001782137.1|( predicted protein [Physcomitrella patens])	gi|12643656|sp|O94609.1|UBA1_SCHPO(RecName: Full=Ubiquitin-activating enzyme E1 1; AltName: Full=Poly(A)+ RNA transport protein 3)
miR319a-3p.2-3p	TRINITY_DN86694_c1_g6	2.8	1	20	2258	2277	TTGGACTGAAGGGTGCTCCC	:||:|*|:|||||||||*||	GACTTTATTTCCCACGATGG	COG4886(S:Function unknown )		COG4886(leucine Rich Repeat)					PF12799.4(LRR_4:Leucine Rich repeats (2 copies)); PF14580.3(LRR_9:Leucine-rich repeat); PF13855.3(LRR_8:Leucine rich repeat); PF16709.2(SCAB-IgPH:Fused Ig-PH domain of plant-specific actin-binding protein)	GO:0015630(cellular_component:microtubule cytoskeleton); GO:0044444(cellular_component:cytoplasmic part); GO:0044430(cellular_component:cytoskeletal part)	gi|902239649|gb|KNA25666.1|( hypothetical protein SOVF_002920 [Spinacia oleracea])	gi|657340709|sp|F4IIU4.1|AIR9_ARATH(RecName: Full=187-kDa microtubule-associated protein AIR9; AltName: Full=Auxin-induced in root cultures protein 9)
miR319a-3p.2-3p	TRINITY_DN88380_c1_g2	2.8	1	20	1961	1980	TTGGACTGAAGGGTGCTCCC	:|:||||||*|:|||||*||	GATCTGACTACTCACGATGG								PF00635.23(Motile_Sperm:MSP (Major sperm protein) domain)	GO:0016020(cellular_component:membrane)	gi|902167614|gb|KNA07399.1|( hypothetical protein SOVF_172200 [Spinacia oleracea])	gi|313471716|sp|B9DHD7.1|VAP22_ARATH(RecName: Full=Vesicle-associated protein 2-2; AltName: Full=Plant VAP homolog 22; Short=AtPVA22; AltName: Full=VAMP-associated protein 2-2; AltName: Full=Vesicle-associated protein 27-2; Contains: RecName: Full=Vesicle-associated protein 2-2, N-terminally processed)
miR319a-3p.2-3p	TRINITY_DN91473_c1_g6	2.8	1	20	837	856	TTGGACTGAAGGGTGCTCCC	::|||||:||||:||||*|*	GGCCTGATTTCCTACGACGA					K20241	WDR44, RAB11BP		PF00400.29(WD40:WD domain, G-beta repeat); PF12894.4(ANAPC4_WD40:Anaphase-promoting complex subunit 4 WD40 domain)		gi|802614960|ref|XP_012074926.1|( PREDICTED: WD repeat-containing protein 44 isoform X2 [Jatropha curcas])	gi|81911154|sp|Q6NVE8.1|WDR44_MOUSE(RecName: Full=WD repeat-containing protein 44; AltName: Full=Rabphilin-11)
miR319a-3p.2-3p	TRINITY_DN91546_c1_g1	2.8	1	20	465	484	TTGGACTGAAGGGTGCTCCC	:||||||:|||*:||||||*	GACCTGATTTCGTACGAGGC					K20457	DHFS	map00790(Folate biosynthesis)	PF08245.9(Mur_ligase_M:Mur ligase middle domain)	GO:0004326(molecular_function:tetrahydrofolylpolyglutamate synthase activity); GO:0046901(biological_process:tetrahydrofolylpolyglutamate biosynthetic process); GO:0005524(molecular_function:ATP binding)	gi|902213268|gb|KNA17217.1|( hypothetical protein SOVF_081740 [Spinacia oleracea])	gi|939319626|sp|F4JYE9.1|DHFS_ARATH(RecName: Full=Dihydrofolate synthetase; Short=AtDFA; AltName: Full=Protein GLOBULAR ARREST 1; Flags: Precursor)
miR395a	TRINITY_DN85023_c0_g1	2.8	1	21	1245	1265	GTGAAGTGCTTGGGGGAACTC	:|:||:|||||||*|||*|||	TATTTTACGAACCACCTGGAG								PF00145.14(DNA_methylase:C-5 cytosine-specific DNA methylase)		gi|731323721|ref|XP_010672585.1|( PREDICTED: DNA (cytosine-5)-methyltransferase DRM2 isoform X1 [Beta vulgaris subsp. vulgaris])	gi|75184795|sp|Q9M548.1|DRM2_ARATH(RecName: Full=DNA (cytosine-5)-methyltransferase DRM2; AltName: Full=Protein DOMAINS REARRANGED METHYLASE 2)
miR395a	TRINITY_DN86615_c0_g2	2.8	1	21	3018	3038	GTGAAGTGCTTGGGGGAACTC	:||||||||*|||:|||**||	TACTTCACGTACCTCCTCAAG										gi|902223978|gb|KNA19654.1|( hypothetical protein SOVF_059590 [Spinacia oleracea])	_
miR395a	TRINITY_DN86988_c0_g3	2.8	1	21	1416	1435	GTGAAGTGCTTGGGGGAACTC	:*|||:||||||||||||*|*	TTCTTTACGAACCCCCTT-AC									GO:0005488(molecular_function:binding)	gi|902239265|gb|KNA25533.1|( hypothetical protein SOVF_003600 [Spinacia oleracea])	gi|729704|sp|Q04832.1|HEXP_LEIMA(RecName: Full=DNA-binding protein HEXBP; AltName: Full=Hexamer-binding protein)
miR395a	TRINITY_DN89666_c0_g1	2.8	1	21	106	125	GTGAAGTGCTTGGGGGAACTC	:||||||:||||:||||*|**	TACTTCATGAACTCCCT-GTT					K03257	EIF4A	map03013(RNA transport)			gi|18400210|ref|NP_566469.1|( translational initiation factor 4A-1 [Arabidopsis thaliana])	gi|1170503|sp|P41376.1|IF4A1_ARATH(RecName: Full=Eukaryotic initiation factor 4A-1; Short=eIF-4A-1; AltName: Full=ATP-dependent RNA helicase eIF4A-1; AltName: Full=DEAD-box ATP-dependent RNA helicase 4)
miR395a	TRINITY_DN91279_c0_g1	2.8	1	21	1338	1358	GTGAAGTGCTTGGGGGAACTC	:||||:*||||||||:|*|||	TACTTTTCGAACCCCTTAGAG					K18592	GGT1_5, CD224	map00460(Cyanoamino acid metabolism); map00590(Arachidonic acid metabolism); map00480(Glutathione metabolism); map00430(Taurine and hypotaurine metabolism)	PF01019.18(G_glu_transpept:Gamma-glutamyltranspeptidase)	GO:0016020(cellular_component:membrane)	gi|902238910|gb|KNA25375.1|( hypothetical protein SOVF_007040 [Spinacia oleracea])	gi|75181457|sp|Q9M0G0.1|GAGT3_ARATH(RecName: Full=Gamma-glutamyltranspeptidase 3; AltName: Full=Gamma-glutamyltransferase 3; AltName: Full=Gamma-glutamyltranspeptidase 4; AltName: Full=Glutathione hydrolase 3)
miR395a	TRINITY_DN91466_c4_g1	2.8	1	21	2911	2930	GTGAAGTGCTTGGGGGAACTC	:|||||||*|||:|:|||*||	TACTTCACTAACTCTCTT-AG		NOG16738(S:Function unknown )		NOG16738(Pentatricopeptide repeat-containing protein)				PF00069.22(Pkinase:Protein kinase domain); PF07714.14(Pkinase_Tyr:Protein tyrosine kinase); PF13041.3(PPR_2:PPR repeat family); PF12854.4(PPR_1:PPR repeat); PF01535.17(PPR:PPR repeat); PF13812.3(PPR_3:Pentatricopeptide repeat domain); PF17177.1(PPR_long:Pentacotripeptide-repeat region of PROPR); PF10037.6(MRP-S27:Mitochondrial 28S ribosomal protein S27); PF14559.3(TPR_19:Tetratricopeptide repeat)…	GO:0016740(molecular_function:transferase activity)	gi|731344235|ref|XP_010683303.1|( PREDICTED: pentatricopeptide repeat-containing protein At1g05670, mitochondrial [Beta vulgaris subsp. vulgaris])	gi|122236365|sp|Q0WVK7.1|PPR12_ARATH(RecName: Full=Pentatricopeptide repeat-containing protein At1g05670, mitochondrial; Flags: Precursor)
miR160h	TRINITY_DN103390_c0_g1	2.8	1	21	64	84	TGCCTGGCTCCCTGCATGCCA	||||*::|||||:||||:|||	ACGGTTTGAGGGGCGTATGGT					K00616	E2.2.1.2, talA, talB	map00030(Pentose phosphate pathway)	PF00923.16(Transaldolase:Transaldolase)		gi|633905007|gb|KDD72662.1|( transaldolase, partial [Helicosporidium sp. ATCC 50920])	gi|1729825|sp|P15019.4|TAL1_YEAST(RecName: Full=Transaldolase)
miR160h	TRINITY_DN71448_c0_g2	2.8	1	21	180	199	TGCCTGGCTCCCTGCATGCCA	:||*|||||||*|||||*|||	GCGTACCGAGGTACGTA-GGT								PF00112.20(Peptidase_C1:Papain family cysteine protease); PF03051.12(Peptidase_C1_2:Peptidase C1-like family)	GO:0008233(molecular_function:peptidase activity)	gi|731350018|ref|XP_010686291.1|( PREDICTED: zingipain-2-like [Beta vulgaris subsp. vulgaris])	gi|193806686|sp|A5HII1.1|ACTN_ACTDE(RecName: Full=Actinidain; Short=Actinidin; AltName: Full=Allergen Act d 1; AltName: Allergen=Act d 1; Flags: Precursor)
miR160h	TRINITY_DN86715_c5_g3	2.8	1	21	195	215	TGCCTGGCTCCCTGCATGCCA	:||||||||*||||*|||||*	GCGGACCGAAGGACATACGGA										gi|731363367|ref|XP_010693396.1|( PREDICTED: auxin response factor 18-like isoform X2 [Beta vulgaris subsp. vulgaris])	gi|75253259|sp|Q653H7.1|ARFR_ORYSJ(RecName: Full=Auxin response factor 18; AltName: Full=OsARF10)
miR397b	TRINITY_DN10943_c0_g2	2.8	1	21	178	198	CCATTGAGTGCAGCGTTGATG	||||:||||:|*||||||*:|	GGTAGCTCATGACGCAACCGC					K00873	PK, pyk	map00010(Glycolysis / Gluconeogenesis); map00230(Purine metabolism); map00620(Pyruvate metabolism)	PF00224.18(PK:Pyruvate kinase, barrel domain); PF02887.13(PK_C:Pyruvate kinase, alpha/beta domain)	GO:0003824(molecular_function:catalytic activity)	gi|595882213|ref|XP_007212555.1|( hypothetical protein PRUPE_ppa015432mg [Prunus persica])	gi|27923979|sp|O62619.2|KPYK_DROME(RecName: Full=Pyruvate kinase; Short=PK)
miR397b	TRINITY_DN85828_c5_g1	2.8	1	21	1880	1900	CCATTGAGTGCAGCGTTGATG	*||:*||:|||||||||||:|	TGTGTCTTACGTCGCAACTGC										gi|731327725|ref|XP_010674672.1|( PREDICTED: uncharacterized protein LOC104890780 [Beta vulgaris subsp. vulgaris])	gi|704000318|sp|F4KBP5.1|CHR4_ARATH(RecName: Full=Protein CHROMATIN REMODELING 4; Short=AtCHR4; AltName: Full=Protein PICKLE RELATED 1)
miR397b	TRINITY_DN89182_c1_g2	2.8	1	21	1239	1258	CCATTGAGTGCAGCGTTGATG	||||||||*|||||:|*|||:	GGTAACTCTCGTCGTA-CTAT		NOG07754(I:Lipid transport and metabolism )		NOG07754(Lysophosphatidylcholine acyltransferase)	K13510	LPCAT1_2	map00565(Ether lipid metabolism); map00564(Glycerophospholipid metabolism)	PF01553.18(Acyltransferase:Acyltransferase)	GO:0016746(molecular_function:transferase activity, transferring acyl groups); GO:0016021(cellular_component:integral component of membrane); GO:0008152(biological_process:metabolic process)	gi|731314056|ref|XP_010684033.1|( PREDICTED: lysophospholipid acyltransferase LPEAT1 isoform X1 [Beta vulgaris subsp. vulgaris])	gi|75154210|sp|Q8L7R3.1|LPCT1_ARATH(RecName: Full=Lysophospholipid acyltransferase LPEAT1; AltName: Full=Lysophosphatidylethanolamine acyltransferase 1; Short=AtLPEAT1)
miR397b	TRINITY_DN92586_c0_g2	2.8	1	21	844	864	CCATTGAGTGCAGCGTTGATG	*||||:|:|||*||||||||:	AGTAATTTACGACGCAACTAT								PF13966.3(zf-RVT:zinc-binding in reverse transcriptase); PF00078.24(RVT_1:Reverse transcriptase (RNA-dependent DNA polymerase))		gi|731373493|ref|XP_010666661.1|( PREDICTED: uncharacterized protein LOC104883796 [Beta vulgaris subsp. vulgaris])	gi|141475|sp|P14381.1|YTX2_XENLA(RecName: Full=Transposon TX1 uncharacterized 149 kDa protein; AltName: Full=ORF 2)
miR1863b	TRINITY_DN76808_c0_g1	2.8	1	24	483	506	AGCTCTGATACCATGTTAACTGTT	*|*||||||||||||||||*||*:	ACAAGACTATGGTACAATTTACTG										gi|359479878|ref|XP_003632368.1|( PREDICTED: CLAVATA3/ESR (CLE)-related protein TDIF [Vitis vinifera])	_
miR1863b	TRINITY_DN87459_c5_g1	2.8	1	24	295	317	AGCTCTGATACCATGTTAACTGTT	*||||||||||*|||||||*|*|:	CCGAGACTATGATACAATTTA-AG					K00924	E2.7.1.-		PF00069.22(Pkinase:Protein kinase domain)	GO:0006468(biological_process:protein phosphorylation); GO:0005509(molecular_function:calcium ion binding); GO:0005524(molecular_function:ATP binding); GO:0004674(molecular_function:protein serine/threonine kinase activity)	gi|731338652|ref|XP_010680435.1|( PREDICTED: CDPK-related kinase 5 [Beta vulgaris subsp. vulgaris])	gi|75337058|sp|Q9SCS2.1|CAMK5_ARATH(RecName: Full=CDPK-related kinase 5; Short=AtCRK5; AltName: Full=Calcium/calmodulin-dependent protein kinase 1)
miR1863b	TRINITY_DN87538_c0_g1	2.8	1	24	120	142	AGCTCTGATACCATGTTAACTGTT	*|||||||||||||||*||**:||	ACGAGACTATGGTACACTT-TTAA								PF07727.11(RVT_2:Reverse transcriptase (RNA-dependent DNA polymerase))	GO:0005488(molecular_function:binding)	gi|147864248|emb|CAN83015.1|( hypothetical protein VITISV_041694 [Vitis vinifera])	gi|130582|sp|P10978.1|POLX_TOBAC(RecName: Full=Retrovirus-related Pol polyprotein from transposon TNT 1-94; Includes: RecName: Full=Protease; Includes: RecName: Full=Reverse transcriptase; Includes: RecName: Full=Endonuclease)
miR1863b	TRINITY_DN89601_c0_g2	2.8	1	24	765	789	AGCTCTGATACCATGTTAACT-GTT	*||||:|||||||||||*|*|*||:	CCGAGGCTATGGTACAAATTAGCAG		NOG65731(S:Function unknown )		NOG65731(Yippee-like)				PF03226.11(Yippee-Mis18:Yippee zinc-binding/DNA-binding /Mis18, centromere assembly)		gi|731311200|ref|XP_010694130.1|( PREDICTED: protein yippee-like At4g27745 [Beta vulgaris subsp. vulgaris])	gi|148887462|sp|Q9T096.2|YIPL6_ARATH(RecName: Full=Protein yippee-like At4g27745)
miR319b-5p	TRINITY_DN90231_c1_g3	2.8	1	21	310	329	GAGCTTTCTTTAGTCCACTCA	*|||||||*|||||||*|:||	GTCGAAAGTAATCAGG-GGGT	COG0545(O:Posttranslational modification, protein turnover, chaperones )		COG0545(Peptidyl-prolyl cis-trans isomerase)					PF00254.25(FKBP_C:FKBP-type peptidyl-prolyl cis-trans isomerase); PF00515.25(TPR_1:Tetratricopeptide repeat); PF07719.14(TPR_2:Tetratricopeptide repeat); PF13432.3(TPR_16:Tetratricopeptide repeat); PF13181.3(TPR_8:Tetratricopeptide repeat); PF13174.3(TPR_6:Tetratricopeptide repeat); PF13424.3(TPR_12:Tetratricopeptide repeat); PF14559.3(TPR_19:Tetratricopeptide repeat)	GO:0030154(biological_process:cell differentiation); GO:0006457(biological_process:protein folding); GO:0048513(biological_process:animal organ development); GO:0042761(biological_process:very long-chain fatty acid biosynthetic process); GO:0016021(cellular_component:integral component of membrane)	gi|902232128|gb|KNA22518.1|( hypothetical protein SOVF_033510 [Spinacia oleracea])	gi|73921623|sp|Q7DMA9.2|PAS1_ARATH(RecName: Full=Peptidyl-prolyl cis-trans isomerase PASTICCINO1; AltName: Full=70 kDa peptidyl-prolyl isomerase; AltName: Full=FK506-binding protein 72; Short=AtFKBP72; AltName: Full=Immunophilin FKBP72; AltName: Full=Peptidyl-prolyl cis-trans isomerase FKBP72; Short=PPIase FKBP72; AltName: Full=Rotamase)
miR319b-5p	TRINITY_DN90348_c3_g1	2.8	1	21	320	340	GAGCTTTCTTTAGTCCACTCA	:|||||||||||:*|||*||*	TTCGAAAGAAATTTGGTAAGA								PF14223.3(Retrotran_gag_2:gag-polypeptide of LTR copia-type)		gi|1012360036|gb|KYP71220.1|( Retrovirus-related Pol polyprotein from transposon TNT 1-94 [Cajanus cajan])	gi|130582|sp|P10978.1|POLX_TOBAC(RecName: Full=Retrovirus-related Pol polyprotein from transposon TNT 1-94; Includes: RecName: Full=Protease; Includes: RecName: Full=Reverse transcriptase; Includes: RecName: Full=Endonuclease)
miR319b-5p	TRINITY_DN90812_c3_g2	2.8	1	21	1846	1866	GAGCTTTCTTTAGTCCACTCA	:|||:||||:|||:||*||||	TTCGGAAGAGATCGGGAGAGT		NOG08160(U:Intracellular trafficking, secretion, and vesicular transport )		NOG08160(exocyst complex component)	K19984	EXOC5, SEC10		PF07393.8(Sec10:Exocyst complex component Sec10); PF08318.9(COG4:COG4 transport protein); PF02743.15(dCache_1:Cache domain)	GO:0009506(cellular_component:plasmodesma); GO:0005886(cellular_component:plasma membrane); GO:0048278(biological_process:vesicle docking); GO:0006887(biological_process:exocytosis); GO:0000145(cellular_component:exocyst)	gi|731330619|ref|XP_010676229.1|( PREDICTED: exocyst complex component SEC10 [Beta vulgaris subsp. vulgaris])	gi|152013638|sp|Q8RVQ5.2|SEC10_ARATH(RecName: Full=Exocyst complex component SEC10; Short=AtSec10; AltName: Full=Exocyst complex component 5)
miR166g-5p	TRINITY_DN69839_c0_g1	2.8	1	21	119	139	GGAATGTTGTCTGGCTCGAGG	:|||||||*|||||||**|||	TCTTACAAGAGACCGAAGTCC					K13303	SGK2		PF00069.22(Pkinase:Protein kinase domain); PF07714.14(Pkinase_Tyr:Protein tyrosine kinase); PF00433.21(Pkinase_C:Protein kinase C terminal domain); PF14531.3(Kinase-like:Kinase-like)	GO:0016740(molecular_function:transferase activity)	gi|302763013|ref|XP_002964928.1|( hypothetical protein SELMODRAFT_83225, partial [Selaginella moellendorffii])	gi|46396018|sp|Q9P7J8.1|GAD8_SCHPO(RecName: Full=Serine/threonine-protein kinase gad8)
miR166g-5p	TRINITY_DN88340_c3_g1	2.8	1	21	779	799	GGAATGTTGTCTGGCTCGAGG	:*|||||||:||::|||||||	TGTTACAACGGATTGAGCTCC										gi|731368914|ref|XP_010696390.1|( PREDICTED: uncharacterized protein LOC104908918 [Beta vulgaris subsp. vulgaris])	_
miR166g-5p	TRINITY_DN88960_c2_g1	2.8	1	21	1572	1591	GGAATGTTGTCTGGCTCGAGG	:||||||*|:|||||||*|*|	TCTTACATCGGACCGAG-TAC	COG5107(A:RNA processing and modification )		COG5107(cleavage stimulation factor, 3 pre-RNA, subunit 3, 77kDa)		K14408	CSTF3, RNA14	map03015(mRNA surveillance pathway)	PF05843.11(Suf:Suppressor of forked protein (Suf)); PF13428.3(TPR_14:Tetratricopeptide repeat); PF14559.3(TPR_19:Tetratricopeptide repeat); PF13429.3(TPR_15:Tetratricopeptide repeat); PF07719.14(TPR_2:Tetratricopeptide repeat)	GO:0006397(biological_process:mRNA processing); GO:0005634(cellular_component:nucleus)	gi|731334406|ref|XP_010678208.1|( PREDICTED: cleavage stimulation factor subunit 77 [Beta vulgaris subsp. vulgaris])	gi|75150664|sp|Q8GUP1.1|CTF77_ARATH(RecName: Full=Cleavage stimulation factor subunit 77; Short=AtCstF-77; Short=AtCstF77; AltName: Full=CF-1 77 kDa subunit; AltName: Full=Cleavage stimulation factor 77 kDa subunit; Short=CSTF 77 kDa subunit; AltName: Full=Protein SUPPRESSORS OF OVEREXPRESSED FCA 2; Short=SOF2)
miR166g-5p	TRINITY_DN89048_c2_g3	2.8	1	21	373	393	GGAATGTTGTCTGGCTCGAGG	::|||||||:|||*|||*|||	TTTTACAACGGACGGAGATCC		NOG25468(I:Lipid transport and metabolism )		NOG25468(glycerol-3-phosphate acyltransferase)	K13508	GPAT	map00564(Glycerophospholipid metabolism); map00561(Glycerolipid metabolism)	PF12710.4(HAD:haloacid dehalogenase-like hydrolase); PF01553.18(Acyltransferase:Acyltransferase)	GO:0016311(biological_process:dephosphorylation); GO:0016791(molecular_function:phosphatase activity); GO:0010143(biological_process:cutin biosynthetic process); GO:0090447(molecular_function:glycerol-3-phosphate 2-O-acyltransferase activity); GO:0009908(biological_process:flower development); GO:0016021(cellular_component:integral component of membrane)	gi|225440642|ref|XP_002279091.1|( PREDICTED: glycerol-3-phosphate 2-O-acyltransferase 6 [Vitis vinifera])	gi|71159388|sp|O80437.1|GPAT6_ARATH(RecName: Full=Glycerol-3-phosphate 2-O-acyltransferase 6; Short=AtGPAT6; AltName: Full=Glycerol-3-phosphate acyltransferase 6)
miR395k	TRINITY_DN101953_c0_g1	2.8	1	21	207	227	GTGAAGTGTTTGGGGGAACTC	:*||||*|||||:||||||||	TCCTTCTCAAACTCCCTTGAG								PF11754.5(Velvet:Velvet factor)			gi|1008819012|sp|Q5BBX1.2|VOSA_EMENI(RecName: Full=Spore development regulator vosA; AltName: Full=Viability of spores protein A)
miR395k	TRINITY_DN140718_c0_g1	2.8	1	21	149	168	GTGAAGTGTTTGGGGGAACTC	||||||*|:||||||:|*|:|	CACTTCTCGAACCCCTT-GGG								PF00078.24(RVT_1:Reverse transcriptase (RNA-dependent DNA polymerase))		gi|571504561|ref|XP_006595311.1|( PREDICTED: uncharacterized protein LOC102668530 [Glycine max])	_
miR395k	TRINITY_DN83467_c0_g1	2.8	1	21	1893	1913	GTGAAGTGTTTGGGGGAACTC	:||||||||:|:::|||*|||	TACTTCACAGATTTCCTAGAG	COG0388(R:General function prediction only )		COG0388(nitrilase cyanide hydratase and apolipoprotein n-acyltransferase)					PF00795.19(CN_hydrolase:Carbon-nitrogen hydrolase)		gi|902169455|gb|KNA07663.1|( hypothetical protein SOVF_169830 [Spinacia oleracea])	gi|75250257|sp|Q94JV5.1|NILP2_ARATH(RecName: Full=Nitrilase-like protein 2)
miR395k	TRINITY_DN87466_c1_g1	2.8	1	21	1454	1474	GTGAAGTGTTTGGGGGAACTC	:|:||||||::||::||||||	TATTTCACAGGCCTTCTTGAG	COG1024(I:Lipid transport and metabolism )		COG1024(Enoyl-CoA hydratase)		K05605	HIBCH	map00640(Propanoate metabolism); map00280(Valine, leucine and isoleucine degradation); map00410(beta-Alanine metabolism)	PF16113.2(ECH_2:Enoyl-CoA hydratase/isomerase); PF00378.17(ECH_1:Enoyl-CoA hydratase/isomerase)	GO:0003860(molecular_function:3-hydroxyisobutyryl-CoA hydrolase activity)	gi|902209155|gb|KNA16112.1|( hypothetical protein SOVF_092040 isoform A [Spinacia oleracea])	gi|75247660|sp|Q8RXN4.1|HIBC5_ARATH(RecName: Full=3-hydroxyisobutyryl-CoA hydrolase-like protein 2, mitochondrial; Flags: Precursor)
miR395k	TRINITY_DN89073_c0_g3	2.8	1	21	2631	2651	GTGAAGTGTTTGGGGGAACTC	||||||::|||||||*||*:|	CACTTCGTAAACCCCGTTTGG					K02154	ATPeV0A, ATP6N	map04145(Phagosome); map00190(Oxidative phosphorylation)	PF01496.16(V_ATPase_I:V-type ATPase 116kDa subunit family)	GO:0015991(biological_process:ATP hydrolysis coupled proton transport); GO:0000220(cellular_component:vacuolar proton-transporting V-type ATPase, V0 domain); GO:0015078(molecular_function:hydrogen ion transmembrane transporter activity); GO:0016021(cellular_component:integral component of membrane)	gi|731312052|ref|XP_010672374.1|( PREDICTED: V-type proton ATPase subunit a3-like [Beta vulgaris subsp. vulgaris])	gi|75265965|sp|Q9SJT7.1|VHAA2_ARATH(RecName: Full=V-type proton ATPase subunit a2; Short=V-ATPase subunit a2; AltName: Full=V-type proton ATPase 95 kDa subunit a isoform 2; Short=V-ATPase 95 kDa isoform a2; AltName: Full=Vacuolar H(+)-ATPase subunit a isoform 2; AltName: Full=Vacuolar proton pump subunit a2; AltName: Full=Vacuolar proton translocating ATPase 95 kDa subunit a isoform 2)
miR395k	TRINITY_DN90363_c0_g1	2.8	1	21	3145	3164	GTGAAGTGTTTGGGGGAACTC	:*||||||:|||||:||*|||	TCCTTCACGAACCCTCT-GAG	COG5186(A:RNA processing and modification )		COG5186(polyA polymerase)		K14376	PAP	map03015(mRNA surveillance pathway)	PF04928.14(PAP_central:Poly(A) polymerase central domain); PF04926.12(PAP_RNA-bind:Poly(A) polymerase predicted RNA binding domain); PF01909.20(NTP_transf_2:Nucleotidyltransferase domain); PF12131.5(DUF3586:Protein of unknown function (DUF3586))	GO:0048827(biological_process:phyllome development); GO:0048519(biological_process:negative regulation of biological process); GO:0003723(molecular_function:RNA binding); GO:0006378(biological_process:mRNA polyadenylation); GO:0009908(biological_process:flower development); GO:0004652(molecular_function:polynucleotide adenylyltransferase activity); GO:0005634(cellular_component:nucleus)	gi|902237178|gb|KNA24682.1|( hypothetical protein SOVF_013410 [Spinacia oleracea])	gi|75264043|sp|Q9LMT2.1|PAPS1_ARATH(RecName: Full=Nuclear poly(A) polymerase 1; Short=PAP(I); Short=Poly(A) polymerase I; AltName: Full=Polynucleotide adenylyltransferase 1)
miR395k	TRINITY_DN90363_c0_g2	2.8	1	21	2635	2654	GTGAAGTGTTTGGGGGAACTC	:*||||||:|||||:||*|||	TTCTTCACGAACCCTCT-GAG	COG5186(A:RNA processing and modification )		COG5186(polyA polymerase)		K14376	PAP	map03015(mRNA surveillance pathway)	PF04928.14(PAP_central:Poly(A) polymerase central domain); PF04926.12(PAP_RNA-bind:Poly(A) polymerase predicted RNA binding domain)	GO:0043631(biological_process:RNA polyadenylation); GO:0031123(biological_process:RNA 3'-end processing); GO:0003723(molecular_function:RNA binding); GO:0004652(molecular_function:polynucleotide adenylyltransferase activity); GO:0005634(cellular_component:nucleus)	gi|731324606|ref|XP_010673060.1|( PREDICTED: nuclear poly(A) polymerase 1 [Beta vulgaris subsp. vulgaris])	gi|75264043|sp|Q9LMT2.1|PAPS1_ARATH(RecName: Full=Nuclear poly(A) polymerase 1; Short=PAP(I); Short=Poly(A) polymerase I; AltName: Full=Polynucleotide adenylyltransferase 1)
miR395k	TRINITY_DN91466_c4_g1	2.8	1	21	2911	2930	GTGAAGTGTTTGGGGGAACTC	:|||||||*|||:|:|||*||	TACTTCACTAACTCTCTT-AG		NOG16738(S:Function unknown )		NOG16738(Pentatricopeptide repeat-containing protein)				PF00069.22(Pkinase:Protein kinase domain); PF07714.14(Pkinase_Tyr:Protein tyrosine kinase); PF13041.3(PPR_2:PPR repeat family); PF12854.4(PPR_1:PPR repeat); PF01535.17(PPR:PPR repeat); PF13812.3(PPR_3:Pentatricopeptide repeat domain); PF17177.1(PPR_long:Pentacotripeptide-repeat region of PROPR); PF10037.6(MRP-S27:Mitochondrial 28S ribosomal protein S27); PF14559.3(TPR_19:Tetratricopeptide repeat)…	GO:0016740(molecular_function:transferase activity)	gi|731344235|ref|XP_010683303.1|( PREDICTED: pentatricopeptide repeat-containing protein At1g05670, mitochondrial [Beta vulgaris subsp. vulgaris])	gi|122236365|sp|Q0WVK7.1|PPR12_ARATH(RecName: Full=Pentatricopeptide repeat-containing protein At1g05670, mitochondrial; Flags: Precursor)
miR395k	TRINITY_DN92264_c2_g2	2.8	1	21	1089	1109	GTGAAGTGTTTGGGGGAACTC	:*||||||::||||:||||||	TTCTTCACGGACCCTCTTGAG	COG0149(G:Carbohydrate transport and metabolism )		COG0149(triosephosphate isomerase)		K01803	TPI, tpiA	map00010(Glycolysis / Gluconeogenesis); map00051(Fructose and mannose metabolism); map00710(Carbon fixation in photosynthetic organisms); map00562(Inositol phosphate metabolism)	PF00121.15(TIM:Triosephosphate isomerase)	GO:0019693(biological_process:ribose phosphate metabolic process); GO:0016853(molecular_function:isomerase activity); GO:0044723(biological_process:single-organism carbohydrate metabolic process); GO:0046496(biological_process:nicotinamide nucleotide metabolic process)	gi|326502178|dbj|BAK06780.1|( predicted protein [Hordeum vulgare subsp. vulgare])	gi|353526354|sp|P17751.4|TPIS_MOUSE(RecName: Full=Triosephosphate isomerase; Short=TIM; AltName: Full=Triose-phosphate isomerase)
miR395k	TRINITY_DN92723_c1_g1	2.8	1	21	3113	3132	GTGAAGTGTTTGGGGGAACTC	:||||||||||*||::|*|||	TACTTCACAAAGCCTTT-GAG	COG0221(C:Energy production and conversion )		COG0221(Pyrophosphate phospho-hydrolase)		K01507	ppa	map00190(Oxidative phosphorylation)	PF00719.16(Pyrophosphatase:Inorganic pyrophosphatase)	GO:0016020(cellular_component:membrane); GO:0016787(molecular_function:hydrolase activity)	gi|703163722|ref|XP_010113422.1|( Soluble inorganic pyrophosphatase [Morus notabilis])	gi|4033424|sp|O48556.1|IPYR_MAIZE(RecName: Full=Soluble inorganic pyrophosphatase; AltName: Full=Pyrophosphate phospho-hydrolase; Short=PPase)
miR828b-5p	TRINITY_DN89524_c1_g6	2.8	1	22	2150	2171	TCTTGCTCAAATGAGTATTCCA	:*||*|||||||||||||||*|	GAAAGGAGTTTACTCATAAGAT					K16732	PRC1		PF03999.9(MAP65_ASE1:Microtubule associated protein (MAP65/ASE1 family))	GO:0044763(biological_process:single-organism cellular process)	gi|870855806|gb|KMT07522.1|( hypothetical protein BVRB_6g151350 [Beta vulgaris subsp. vulgaris])	gi|75262488|sp|Q9FHM4.1|MA653_ARATH(RecName: Full=65-kDa microtubule-associated protein 3; Short=AtMAP65-3; AltName: Full=Protein PLEIADE)
miR828b-5p	TRINITY_DN90389_c6_g1	2.8	1	22	11	32	TCTTGCTCAAATGAGTATTCCA	:||||*|||||||||||**|*|	GGAACAAGTTTACTCATTTGTT								PF02373.19(JmjC:JmjC domain, hydroxylase); PF02375.14(JmjN:jmjN domain)		gi|731375890|ref|XP_010667395.1|( PREDICTED: lysine-specific demethylase REF6 [Beta vulgaris subsp. vulgaris])	gi|75337637|sp|Q9STM3.1|REF6_ARATH(RecName: Full=Lysine-specific demethylase REF6; AltName: Full=Jumonji domain-containing protein 12; AltName: Full=Lysine-specific histone demethylase REF6; AltName: Full=Protein RELATIVE OF EARLY FLOWERING 6)
miR828b-5p	TRINITY_DN92820_c1_g2	2.8	1	22	3117	3137	TCTTGCTCAAATGAGTATTCCA	||:|||||||||||*||*:||*	AGGACGAGTTTACTAAT-GGGA					K04733	IRAK4		PF07714.14(Pkinase_Tyr:Protein tyrosine kinase); PF00069.22(Pkinase:Protein kinase domain); PF04564.12(U-box:U-box domain)		gi|731311621|ref|XP_010670290.1|( PREDICTED: U-box domain-containing protein 33-like isoform X3 [Beta vulgaris subsp. vulgaris])	gi|172045745|sp|Q8GUH1.2|PUB33_ARATH(RecName: Full=U-box domain-containing protein 33; AltName: Full=Plant U-box protein 33; Includes: RecName: Full=E3 ubiquitin ligase; Includes: RecName: Full=Serine/threonine-protein kinase)
miR156b-3p	TRINITY_DN84445_c0_g1	2.8	1	22	2330	2351	TGCTCACTCTCTATCTGTCACC	:*|||||:|||:||||||||*|	GGGAGTGGGAGGTAGACAGTAG								PF00201.15(UDPGT:UDP-glucoronosyl and UDP-glucosyl transferase); PF00403.23(HMA:Heavy-metal-associated domain)	GO:0008152(biological_process:metabolic process); GO:0016758(molecular_function:transferase activity, transferring hexosyl groups)	gi|702259009|ref|XP_010031261.1|( PREDICTED: UDP-glycosyltransferase 89B1-like [Eucalyptus grandis])	gi|334351258|sp|Q9C9B0.2|U89B1_ARATH(RecName: Full=UDP-glycosyltransferase 89B1; AltName: Full=Flavonol 3-O-glucosyltransferase UGT89B1; AltName: Full=Flavonol 7-O-glucosyltransferase UGT89B1)
miR156b-3p	TRINITY_DN90181_c0_g5	2.8	1	22	414	435	TGCTCACTCTCTATCTGTCACC	*||:||||||||*||||:||*|	CCGGGTGAGAGAAAGACGGTAG	COG0096(J:Translation, ribosomal structure and biogenesis )		COG0096(One of the primary rRNA binding proteins, it binds directly to 16S rRNA central domain where it helps coordinate assembly of the platform of the 30S subunit (By similarity))		K02957	RP-S15Ae, RPS15A	map03010(Ribosome)	PF00410.16(Ribosomal_S8:Ribosomal protein S8)	GO:0005840(cellular_component:ribosome); GO:0003735(molecular_function:structural constituent of ribosome); GO:0006412(biological_process:translation)	gi|743780258|ref|XP_011024999.1|( PREDICTED: 40S ribosomal protein S15a-like isoform X1 [Populus euphratica])	gi|50403624|sp|P62244.2|RS15A_HUMAN(RecName: Full=40S ribosomal protein S15a >gi|54039450|sp|P62246.2|RS15A_RAT RecName: Full=40S ribosomal protein S15a >gi|54039458|sp|P62245.2|RS15A_MOUSE RecName: Full=40S ribosomal protein S15a >gi|75063868|sp|Q76I82.1|RS15A_BOVIN RecName: Full=40S ribosomal protein S15a)
miR166e-3p	TRINITY_DN91558_c0_g7	2.8	1	21	1115	1135	TCGAACCAGGCTTCATTCCCC	:||*||||||||||||:||**	GGCCTGGTCCGAAGTAGGGTC		NOG185548(K:Transcription )		NOG185548(MEKHLA domain)	K09338	HD-ZIP		PF08670.8(MEKHLA:MEKHLA domain); PF01852.16(START:START domain); PF00046.26(Homeobox:Homeobox domain)	GO:0030154(biological_process:cell differentiation); GO:0010014(biological_process:meristem initiation); GO:0009956(biological_process:radial pattern formation); GO:0008289(molecular_function:lipid binding); GO:0010051(biological_process:xylem and phloem pattern formation); GO:0009944(biological_process:polarity specification of adaxial/abaxial axis); GO:0044212(molecular_function:transcription r…	gi|731356182|ref|XP_010689538.1|( PREDICTED: homeobox-leucine zipper protein REVOLUTA-like [Beta vulgaris subsp. vulgaris])	gi|75203823|sp|Q9SE43.2|REV_ARATH(RecName: Full=Homeobox-leucine zipper protein REVOLUTA; AltName: Full=HD-ZIP protein REV; AltName: Full=Homeodomain transcription factor REV; AltName: Full=Protein AMPHIVASAL VASCULAR BUNDLE 1; AltName: Full=Protein INTERFASCICULAR FIBERLESS 1)
miR164e	TRINITY_DN69718_c0_g2	2.8	1	21	153	172	TGGAGAAGCAGGGCACGTGAG	:||||||||*|||*|||*|||	GCCTCTTCGGCCCCTGC-CTC					K00847	E2.7.1.4, scrK	map00520(Amino sugar and nucleotide sugar metabolism); map00500(Starch and sucrose metabolism); map00051(Fructose and mannose metabolism)	PF00294.21(PfkB:pfkB family carbohydrate kinase)	GO:0046835(biological_process:carbohydrate phosphorylation); GO:0005524(molecular_function:ATP binding); GO:0019252(biological_process:starch biosynthetic process); GO:0008865(molecular_function:fructokinase activity)	gi|1002291830|ref|XP_015650262.1|( PREDICTED: fructokinase-2 [Oryza sativa Japonica Group])	gi|122234591|sp|Q0J8G4.1|SCRK2_ORYSJ(RecName: Full=Fructokinase-2; AltName: Full=Fructokinase II; AltName: Full=OsFKII >gi|158513662|sp|A2YQL4.2|SCRK2_ORYSI RecName: Full=Fructokinase-2; AltName: Full=Fructokinase II; AltName: Full=OsFKII)
miR164e	TRINITY_DN81305_c0_g1	2.8	1	21	555	574	TGGAGAAGCAGGGCACGTGAG	:*||||||||||||||*||*|	GGCTCTTCGTCCCGTG-ACGC					K17871	ndh1		PF07992.11(Pyr_redox_2:Pyridine nucleotide-disulphide oxidoreductase)		gi|326491059|dbj|BAK05629.1|( predicted protein [Hordeum vulgare subsp. vulgare])	gi|378548409|sp|F2Z699.1|NDH2_YARLI(RecName: Full=External alternative NADH-ubiquinone oxidoreductase, mitochondrial; AltName: Full=External alternative NADH dehydrogenase; AltName: Full=NADH:ubiquinone reductase (non-electrogenic); Flags: Precursor)
miR164e	TRINITY_DN86188_c2_g1	2.8	1	21	71	91	TGGAGAAGCAGGGCACGTGAG	||||||||*|:|||||::*||	ACCTCTTCTTTCCGTGTGGTC					K03798	ftsH, hflB		PF00004.26(AAA:ATPase family associated with various cellular activities (AAA)); PF06068.10(TIP49:TIP49 C-terminus); PF07728.11(AAA_5:AAA domain (dynein-related subfamily)); PF13245.3(AAA_19:Part of AAA domain); PF05496.9(RuvB_N:Holliday junction DNA helicase ruvB N-terminus); PF01695.14(IstB_IS21:IstB-like ATP binding protein); PF13207.3(AAA_17:AAA domain); PF13191.3(AAA_16:AAA ATPase domain); P…	GO:0004222(molecular_function:metalloendopeptidase activity); GO:0005524(molecular_function:ATP binding); GO:0016021(cellular_component:integral component of membrane); GO:0006508(biological_process:proteolysis); GO:0008270(molecular_function:zinc ion binding)	gi|923625019|ref|XP_013748740.1|( PREDICTED: ATP-dependent zinc metalloprotease FTSH 2, chloroplastic [Brassica napus])	gi|75318709|sp|O80860.1|FTSH2_ARATH(RecName: Full=ATP-dependent zinc metalloprotease FTSH 2, chloroplastic; Short=AtFTSH2; AltName: Full=Protein VARIEGATED 2; Flags: Precursor)
miR164e	TRINITY_DN86757_c0_g4	2.8	1	21	187	206	TGGAGAAGCAGGGCACGTGAG	||:||||||||||||*|:**|	ACTTCTTCGTCCCGTACG-AC					K01681	ACO, acnA	map00020(Citrate cycle (TCA cycle)); map00630(Glyoxylate and dicarboxylate metabolism)		GO:0046872(molecular_function:metal ion binding); GO:0016491(molecular_function:oxidoreductase activity); GO:0006099(biological_process:tricarboxylic acid cycle); GO:0051539(molecular_function:4 iron, 4 sulfur cluster binding); GO:0003994(molecular_function:aconitate hydratase activity); GO:0005739(cellular_component:mitochondrion)	gi|326503140|dbj|BAJ99195.1|( predicted protein [Hordeum vulgare subsp. vulgare])	gi|961512531|sp|D4AT77.1|ACON_ARTBC(RecName: Full=Aconitate hydratase, mitochondrial; Short=Aconitase; AltName: Full=Citrate hydro-lyase; Flags: Precursor)
miR164e	TRINITY_DN87113_c4_g6	2.8	1	21	1045	1065	TGGAGAAGCAGGGCACGTGAG	:|:||||:||||||||:::*|	GCTTCTTTGTCCCGTGTGTAC										gi|1173351|sp|P42552.1|S1FA_SPIOL(S1FA_SPIOL RecName: Full=DNA-binding protein S1FA [Spinacia oleracea])	gi|1173351|sp|P42552.1|S1FA_SPIOL(RecName: Full=DNA-binding protein S1FA)
miR399p	TRINITY_DN11267_c0_g1	2.8	1	21	396	416	TGCCAAAGGAGAGTTGCCCTG	|:||||||:|||||||*|*|:	ATGGTTTCTTCTCAACTGCAT	COG0339(E:Amino acid transport and metabolism )		COG0339(oligopeptidase a)		K01405	PRD1		PF01432.17(Peptidase_M3:Peptidase family M3)	GO:0008233(molecular_function:peptidase activity)	gi|971508828|dbj|GAQ89369.1|( thimet oligopeptidase [Klebsormidium flaccidum])	gi|140398|sp|P25375.1|PRTD_YEAST(RecName: Full=Saccharolysin; AltName: Full=Oligopeptidase YSCD; AltName: Full=Protease D; AltName: Full=Proteinase yscD)
miR399p	TRINITY_DN83619_c0_g2	2.8	1	21	1277	1297	TGCCAAAGGAGAGTTGCCCTG	|||||||:||:|:|:|||*:|	ACGGTTTTCTTTTAGCGGTGC									GO:0051082(molecular_function:unfolded protein binding); GO:0031072(molecular_function:heat shock protein binding)	gi|902161871|gb|KNA06605.1|( hypothetical protein SOVF_179440 [Spinacia oleracea])	gi|81898706|sp|Q8C3L1.1|SSUH2_MOUSE(RecName: Full=Protein SSUH2 homolog; AltName: Full=Protein ssu-2 homolog)
miR399p	TRINITY_DN84435_c0_g1	2.8	1	21	4159	4178	TGCCAAAGGAGAGTTGCCCTG	|||||||||||||*||**||:	ACGGTTTCCTCTCCAC-TGAT								PF14309.3(DUF4378:Domain of unknown function (DUF4378))		gi|731319242|ref|XP_010670156.1|( PREDICTED: protein LONGIFOLIA 1-like [Beta vulgaris subsp. vulgaris])	gi|75174038|sp|Q9LF24.1|LNG1_ARATH(RecName: Full=Protein LONGIFOLIA 1; AltName: Full=Protein TON1 RECRUITING MOTIF 2)
miR399p	TRINITY_DN87458_c2_g3	2.8	1	21	607	627	TGCCAAAGGAGAGTTGCCCTG	:||||||||*|||:|||**||	GCGGTTTCCACTCGACGATAC					K19861	BEBT, AMAT		PF02458.12(Transferase:Transferase family)		gi|731324037|ref|XP_010672751.1|( PREDICTED: benzyl alcohol O-benzoyltransferase-like [Beta vulgaris subsp. vulgaris])	gi|122218027|sp|Q3ZPN4.1|ACMAT_VITLA(RecName: Full=Methanol O-anthraniloyltransferase; AltName: Full=Anthraniloyl-CoA:methanol acyltransferase; AltName: Full=Benzyl alcohol O-benzoyltransferase)
miR399p	TRINITY_DN87788_c1_g1	2.8	1	21	612	631	TGCCAAAGGAGAGTTGCCCTG	||*|||*||||||||||*||:	ACCGTTACCTCTCAACG-GAT					K14487	GH3	map04075(Plant hormone signal transduction)	PF03321.10(GH3:GH3 auxin-responsive promoter)		gi|731337012|ref|XP_010679563.1|( PREDICTED: probable indole-3-acetic acid-amido synthetase GH3.1 [Beta vulgaris subsp. vulgaris])	gi|122167127|sp|Q0D4Z6.1|GH38_ORYSJ(RecName: Full=Probable indole-3-acetic acid-amido synthetase GH3.8; AltName: Full=Auxin-responsive GH3-like protein 8; Short=OsGH3-8 >gi|158513704|sp|A3BLS0.2|GH38_ORYSI RecName: Full=Probable indole-3-acetic acid-amido synthetase GH3.8; AltName: Full=Auxin-responsive GH3-like protein 8; Short=OsGH3-8)
miR171d	TRINITY_DN86683_c0_g6	2.8	1	21	379	399	AGATTGAGCCGCGCCAATATC	*||:|||:|*|||||||:|||	GCTGACTTGTCGCGGTTGTAG		NOG01365(R:General function prediction only )		NOG01365(ran binding protein)				PF00622.25(SPRY:SPRY domain)		gi|902240587|gb|KNA26020.1|( hypothetical protein SOVF_000080 [Spinacia oleracea])	gi|82117647|sp|Q9PTY5.1|RANB9_XENLA(RecName: Full=Ran-binding protein 9; Short=RanBP9; AltName: Full=Ran-binding protein M; Short=RanBPM)
miR171d	TRINITY_DN87648_c2_g1	2.8	1	21	1575	1595	AGATTGAGCCGCGCCAATATC	|:||||||||*||*|||||:|	TTTAACTCGGAGCAGTTATGG					K00857	tdk, TK	map00240(Pyrimidine metabolism)	PF00265.15(TK:Thymidine kinase)		gi|672193958|ref|XP_008776173.1|( PREDICTED: thymidine kinase-like [Phoenix dactylifera])	gi|998490991|sp|F4KBF5.1|KITHB_ARATH(RecName: Full=Thymidine kinase b; Short=AtTK1b)
miR156a	TRINITY_DN102679_c0_g1	2.8	1	21	223	243	TGACAGAAGAGAGAGAGCACA	:||||||*|||||*|||*|||	GCTGTCTCCTCTCCCTCCTGT					K01476	E3.5.3.1, rocF, arg	map00220(Arginine biosynthesis); map00330(Arginine and proline metabolism)	PF00491.18(Arginase:Arginase family)		gi|168070274|ref|XP_001786754.1|( predicted protein [Physcomitrella patens])	gi|51704272|sp|P33280.3|ARGI_NEUCR(RecName: Full=Arginase)
miR156a	TRINITY_DN85162_c0_g1	2.8	1	21	1162	1182	TGACAGAAGAGAGAGAGCACA	:|||||||||||||**|||*|	GCTGTCTTCTCTCTGGCGTCT	COG0377(C:Energy production and conversion )		COG0377(NDH-1 shuttles electrons from NADH, via FMN and iron- sulfur (Fe-S) centers, to quinones in the respiratory chain. The immediate electron acceptor for the enzyme in this species is believed to be ubiquinone. Couples the redox reaction to proton translocation (for every two electrons transferred, four hydrogen ions are translocated across the cytoplasmic membrane), and thus conserves the r…		K03940	NDUFS7	map00190(Oxidative phosphorylation)	PF01058.19(Oxidored_q6:NADH ubiquinone oxidoreductase, 20 Kd subunit)	GO:0046872(molecular_function:metal ion binding); GO:0051539(molecular_function:4 iron, 4 sulfur cluster binding); GO:0005739(cellular_component:mitochondrion); GO:0055114(biological_process:oxidation-reduction process); GO:0048038(molecular_function:quinone binding); GO:0008137(molecular_function:NADH dehydrogenase (ubiquinone) activity)	gi|150406467|ref|YP_001315111.1|( NADH dehydrogenase subunit 10 [Chlorokybus atmophyticus])	gi|6647651|sp|O47950.1|NDUS7_NEUCR(RecName: Full=NADH-ubiquinone oxidoreductase 19.3 kDa subunit, mitochondrial; AltName: Full=Complex I-19.3kD; Short=CI-19.3kD; Flags: Precursor)
miR156a	TRINITY_DN86227_c0_g1	2.8	1	21	3800	3821	TGACAGAAGAGAGAGAGC-ACA	:||||||||||||*:||**|||	GCTGTCTTCTCTCATTCTATGT								PF13041.3(PPR_2:PPR repeat family); PF12854.4(PPR_1:PPR repeat); PF01535.17(PPR:PPR repeat); PF13812.3(PPR_3:Pentatricopeptide repeat domain); PF17177.1(PPR_long:Pentacotripeptide-repeat region of PROPR); PF10037.6(MRP-S27:Mitochondrial 28S ribosomal protein S27); PF17049.2(AEP1:ATPase expression protein 1); PF00637.17(Clathrin:Region in Clathrin and VPS); PF01095.16(Pectinesterase:Pectinesterase)		gi|902146131|gb|KNA05033.1|( hypothetical protein SOVF_194150 [Spinacia oleracea])	gi|75170916|sp|Q9FIX3.1|PP407_ARATH(RecName: Full=Pentatricopeptide repeat-containing protein At5g39710; AltName: Full=Protein EMBRYO DEFECTIVE 2745)
miR5077	TRINITY_DN118255_c0_g1	2.8	1	19	61	79	GTTCGCGTCGGGTTCACCA	:|:*|||||||||*|||||	TAGTCGCAGCCCATGTGGT					K02993	RP-S7e, RPS7	map03010(Ribosome)	PF01251.15(Ribosomal_S7e:Ribosomal protein S7e)	GO:0006412(biological_process:translation); GO:0006364(biological_process:rRNA processing); GO:0003735(molecular_function:structural constituent of ribosome); GO:0022627(cellular_component:cytosolic small ribosomal subunit); GO:0030686(cellular_component:90S preribosome); GO:0042274(biological_process:ribosomal small subunit biogenesis); GO:0032040(cellular_component:small-subunit processome)	gi|302832948|ref|XP_002948038.1|( component of cytosolic 80S ribosome and 40S small subunit [Volvox carteri f. nagariensis])	gi|49065830|sp|P62083.1|RS7_RAT(RecName: Full=40S ribosomal protein S7; AltName: Full=S8 >gi|49065831|sp|P62081.1|RS7_HUMAN RecName: Full=40S ribosomal protein S7 >gi|49065832|sp|P62082.1|RS7_MOUSE RecName: Full=40S ribosomal protein S7 >gi|62287199|sp|Q5RT64.1|RS7_FELCA RecName: Full=40S ribosomal protein S7 >gi|205806695|sp|A6H769.1|RS7_BOVIN RecName: Full=40S ribosomal protein S7)
miR5077	TRINITY_DN53032_c0_g1	2.8	1	19	176	194	GTTCGCGTCGGGTTCACCA	:||*||||||:||||*|||	TAACCGCAGCTCAAGCGGT					K07904	RAB11A	map04144(Endocytosis)		GO:0005525(molecular_function:GTP binding); GO:0005622(cellular_component:intracellular); GO:0007264(biological_process:small GTPase mediated signal transduction)	gi|937912207|dbj|BAS87127.1|( Os03g0823700 [Oryza sativa Japonica Group])	gi|3024501|sp|Q40193.1|RB11C_LOTJA(RecName: Full=Ras-related protein Rab11C)
miR5077	TRINITY_DN83418_c0_g1	2.8	1	19	3017	3035	GTTCGCGTCGGGTTCACCA	:|||||:||::|:||||*|	TAAGCGTAGTTCGAGTGTT								PF07526.8(POX:Associated with HOX); PF05920.8(Homeobox_KN:Homeobox KN domain); PF00046.26(Homeobox:Homeobox domain)		gi|731375048|ref|XP_010667130.1|( PREDICTED: homeobox protein ATH1 [Beta vulgaris subsp. vulgaris])	gi|1351999|sp|P48731.1|ATH1_ARATH(RecName: Full=Homeobox protein ATH1)
miR5077	TRINITY_DN84155_c0_g1	2.8	1	19	996	1013	GTTCGCGTCGGGTTCACCA	:||||*||*||||||||*|	TAAGCACATCCCAAGTG-T										gi|590639995|ref|XP_007029831.1|( Prefoldin chaperone subunit family protein [Theobroma cacao])	_
miR5077	TRINITY_DN89630_c3_g7	2.8	1	19	447	464	GTTCGCGTCGGGTTCACCA	:||||*||||||||*||*|	TAAGCCCAGCCCAACTG-T	COG2084(I:Lipid transport and metabolism )		COG2084(Dehydrogenase)					PF03446.12(NAD_binding_2:NAD binding domain of 6-phosphogluconate dehydrogenase); PF14833.3(NAD_binding_11:NAD-binding of NADP-dependent 3-hydroxyisobutyrate dehydrogenase); PF03807.14(F420_oxidored:NADP oxidoreductase coenzyme F420-dependent); PF01488.17(Shikimate_DH:Shikimate / quinate 5-dehydrogenase); PF02826.16(2-Hacid_dh_C:D-isomer specific 2-hydroxyacid dehydrogenase, NAD binding domain); …	GO:0004616(molecular_function:phosphogluconate dehydrogenase (decarboxylating) activity); GO:0051287(molecular_function:NAD binding); GO:0055114(biological_process:oxidation-reduction process)	gi|902168991|gb|KNA07588.1|( hypothetical protein SOVF_169570 [Spinacia oleracea])	gi|75266757|sp|Q9SZE1.1|3HID1_ARATH(RecName: Full=Probable 3-hydroxyisobutyrate dehydrogenase-like 1, mitochondrial; Short=HIBADH-like; Flags: Precursor)
miR5077	TRINITY_DN92576_c1_g1	2.8	1	19	293	310	GTTCGCGTCGGGTTCACCA	:|||:|||||:|||||**|	TAAGTGCAGCTCAAGT-TT					K07561	DPH1, dph2		PF01866.14(Diphthamide_syn:Putative diphthamide synthesis protein)	GO:0017183(biological_process:peptidyl-diphthamide biosynthetic process from peptidyl-histidine)	gi|731328706|ref|XP_010675198.1|( PREDICTED: diphthamide biosynthesis protein 1 [Beta vulgaris subsp. vulgaris])	gi|84028906|sp|Q4IQ72.1|DPH1_GIBZE(RecName: Full=Diphthamide biosynthesis protein 1)
miR319d-5p	TRINITY_DN81585_c0_g1	2.8	1	21	961	981	AGAGCTCTCTTCAGTCCACTC	|:|:|:||||||||:|||*:|	TTTTGGGAGAAGTCGGGTTGG								PF13813.3(MBOAT_2:Membrane bound O-acyl transferase family)		gi|731329901|ref|XP_010675843.1|( PREDICTED: probable long-chain-alcohol O-fatty-acyltransferase 5 [Beta vulgaris subsp. vulgaris])	gi|75170974|sp|Q9FJ74.1|WAXS3_ARATH(RecName: Full=Probable long-chain-alcohol O-fatty-acyltransferase 3; AltName: Full=Wax synthase 3)
miR172h-5p	TRINITY_DN71642_c0_g1	2.8	1	21	1	21	GGAGCACCATCAAGATTCACA	:||*|||||||||||::|||*	TCTAGTGGTAGTTCTGGGTGC	COG0529(P:Inorganic ion transport and metabolism )		COG0529(Catalyzes the synthesis of activated sulfate (By similarity))		K00860	cysC	map00230(Purine metabolism); map00920(Sulfur metabolism)	PF01583.17(APS_kinase:Adenylylsulphate kinase); PF13671.3(AAA_33:AAA domain)	GO:0006790(biological_process:sulfur compound metabolic process); GO:0016301(molecular_function:kinase activity); GO:0000166(molecular_function:nucleotide binding)	gi|552811478|ref|XP_005843477.1|( hypothetical protein CHLNCDRAFT_141154 [Chlorella variabilis])	gi|146345442|sp|Q92203.2|KAPS_EMENI(RecName: Full=Adenylyl-sulfate kinase; AltName: Full=ATP adenosine-5'-phosphosulfate 3'-phosphotransferase; AltName: Full=Adenosine-5'-phosphosulfate kinase; Short=APS kinase)
miR172h-5p	TRINITY_DN75881_c0_g1	2.8	1	21	739	759	GGAGCACCATCAAGATTCACA	:||||||||||||:|:*||*|	TCTCGTGGTAGTTTTGCGTCT					K07374	TUBA	map04145(Phagosome)	PF00091.22(Tubulin:Tubulin/FtsZ family, GTPase domain); PF14881.3(Tubulin_3:Tubulin domain)	GO:0005737(cellular_component:cytoplasm); GO:0005200(molecular_function:structural constituent of cytoskeleton); GO:0005525(molecular_function:GTP binding); GO:0007017(biological_process:microtubule-based process); GO:0003924(molecular_function:GTPase activity); GO:0005874(cellular_component:microtubule)	gi|326515212|dbj|BAK03519.1|( predicted protein [Hordeum vulgare subsp. vulgare])	gi|1174593|sp|P41383.1|TBA2_PATVU(RecName: Full=Tubulin alpha-2/alpha-4 chain)
miR172h-5p	TRINITY_DN85723_c1_g2	2.8	1	21	1698	1718	GGAGCACCATCAAGATTCACA	:||*|||||*|||||||*|||	TCTGGTGGTTGTTCTAATTGT					K19041	RNF38_44		PF13639.3(zf-RING_2:Ring finger domain); PF12678.4(zf-rbx1:RING-H2 zinc finger domain); PF17123.2(zf-RING_11:RING-like zinc finger); PF13923.3(zf-C3HC4_2:Zinc finger, C3HC4 type (RING finger)); PF13445.3(zf-RING_UBOX:RING-type zinc-finger); PF12861.4(zf-ANAPC11:Anaphase-promoting complex subunit 11 RING-H2 finger); PF13920.3(zf-C3HC4_3:Zinc finger, C3HC4 type (RING finger)); PF14447.3(Prok-RING_4…	GO:0046872(molecular_function:metal ion binding)	gi|870847521|gb|KMS99868.1|( hypothetical protein BVRB_1g017200 [Beta vulgaris subsp. vulgaris])	gi|68565092|sp|P0C034.1|ATL10_ARATH(RecName: Full=RING-H2 finger protein ATL10)
miR172h-5p	TRINITY_DN86141_c0_g2	2.8	1	21	174	193	GGAGCACCATCAAGATTCACA	:||||*||||||||||:*|*|	TCTCGCGGTAGTTCTAGAT-T	COG1358(J:Translation, ribosomal structure and biogenesis )		COG1358((ribosomal) protein)		K02936	RP-L7Ae, RPL7A	map03010(Ribosome)	PF01248.23(Ribosomal_L7Ae:Ribosomal protein L7Ae/L30e/S12e/Gadd45 family)	GO:0006412(biological_process:translation); GO:0003723(molecular_function:RNA binding); GO:0000470(biological_process:maturation of LSU-rRNA); GO:0022625(cellular_component:cytosolic large ribosomal subunit)	gi|168039775|ref|XP_001772372.1|( predicted protein [Physcomitrella patens])	gi|417670|sp|P29453.3|RL8B_YEAST(RecName: Full=60S ribosomal protein L8-B; AltName: Full=L4; AltName: Full=L4-1; AltName: Full=RP6; AltName: Full=YL5)
miR172h-5p	TRINITY_DN87208_c1_g1	2.8	1	21	1279	1299	GGAGCACCATCAAGATTCACA	:|||*||||:||||*||||||	TCTCATGGTGGTTCCAAGTGT					K04733	IRAK4		PF00069.22(Pkinase:Protein kinase domain); PF07714.14(Pkinase_Tyr:Protein tyrosine kinase)	GO:0004672(molecular_function:protein kinase activity); GO:0016020(cellular_component:membrane); GO:0000166(molecular_function:nucleotide binding)	gi|731316793|ref|XP_010665786.1|( PREDICTED: probable receptor-like protein kinase At1g80640 isoform X1 [Beta vulgaris subsp. vulgaris])	gi|122242302|sp|Q0V7T5.1|Y1864_ARATH(RecName: Full=Probable receptor-like protein kinase At1g80640; Flags: Precursor)
miR172h-5p	TRINITY_DN90388_c0_g1	2.8	1	21	1612	1632	GGAGCACCATCAAGATTCACA	::|:|||||||||||||***|	TTTTGTGGTAGTTCTAAACCT										gi|590638582|ref|XP_007029432.1|( Phosphoprotein phosphatase [Theobroma cacao])	gi|46396003|sp|Q9LRR5.1|DRL21_ARATH(RecName: Full=Putative disease resistance protein At3g14460)
miR167h-5p	TRINITY_DN105422_c0_g1	2.8	1	21	286	307	TGAAGCTGCCAACATGAT-CTG	*||*|||||||||||||:*|::	TCTACGACGGTTGTACTGTGGT		NOG144514(G:Carbohydrate transport and metabolism )		NOG144514(Colipase is a cofactor of pancreatic lipase. It allows the lipase to anchor itself to the lipid-water interface. Without colipase the enzyme is washed off by bile salts, which have an inhibitory effect on the lipase)	K14460	CLPS		PF02740.11(Colipase_C:Colipase, C-terminal domain); PF01114.15(Colipase:Colipase, N-terminal domain)			gi|24418352|sp|Q9CQC2.1|COL_MOUSE(RecName: Full=Colipase; Flags: Precursor)
miR167h-5p	TRINITY_DN19312_c0_g1	2.8	1	21	948	967	TGAAGCTGCCAACATGATCTG	|||||||||||*|*|||||*:	ACTTCGACGGTGGAACTAG-T					K01637	E4.1.3.1, aceA	map00630(Glyoxylate and dicarboxylate metabolism)	PF00463.18(ICL:Isocitrate lyase family); PF13714.3(PEP_mutase:Phosphoenolpyruvate phosphomutase)	GO:0008152(biological_process:metabolic process); GO:0016829(molecular_function:lyase activity)	gi|326491633|dbj|BAJ94294.1|( predicted protein [Hordeum vulgare subsp. vulgare])	gi|13123962|sp|Q9P8Q7.1|ACEA_CANAX(RecName: Full=Isocitrate lyase; Short=ICL; Short=Isocitrase; Short=Isocitratase; AltName: Full=Methylisocitrate lyase; Short=MICA; AltName: Full=Threo-D(S)-isocitrate glyoxylate-lyase)
miR167h-5p	TRINITY_DN93262_c2_g1	2.8	1	21	1188	1208	TGAAGCTGCCAACATGATCTG	|||||||||||*||*|||*:|	ACTTCGACGGTGGTCCTAAGC		NOG08692(K:Transcription )		NOG08692(SWI SNF related matrix associated actin dependent regulator of chromatin subfamily B member 1)	K11648	SMARCB1, SNF5, INI1		PF04855.9(SNF5:SNF5 / SMARCB1 / INI1)	GO:0006281(biological_process:DNA repair); GO:0006357(biological_process:regulation of transcription from RNA polymerase II promoter); GO:0000228(cellular_component:nuclear chromosome); GO:0043044(biological_process:ATP-dependent chromatin remodeling); GO:0006337(biological_process:nucleosome disassembly)	gi|902237490|gb|KNA24827.1|( hypothetical protein SOVF_012040 [Spinacia oleracea])	gi|71152345|sp|P93045.2|BSH_ARATH(RecName: Full=Chromatin structure-remodeling complex protein BSH; Short=AtBSH; AltName: Full=Protein BUSHY; AltName: Full=SNF5 homolog)
miR399k	TRINITY_DN112404_c0_g1	2.8	1	21	166	186	TGCCAAAGGAAATTTGCCCCG	|:||*|||||||||:||||*:	ATGGCTTCCTTTAAGCGGGAT					K05022	CLIC2				gi|685052052|dbj|BAP47517.1|( dehydroascorbate reductase [Gentiana triflora])	gi|41688549|sp|Q8WQA4.2|EXC4_CAEEL(RecName: Full=Chloride intracellular channel exc-4; AltName: Full=Excretory canal abnormal protein 4)
miR399k	TRINITY_DN81237_c0_g1	2.8	1	21	734	754	TGCCAAAGGAAATTTGCCCCG	:|||||||||||::|:|**||	GCGGTTTCCTTTGGATGCAGC										gi|870856862|gb|KMT08451.1|( hypothetical protein BVRB_6g141280 [Beta vulgaris subsp. vulgaris])	_
miR399k	TRINITY_DN84459_c0_g1	2.8	1	21	665	685	TGCCAAAGGAAATTTGCCCCG	*||||||*:||||||||*||:	TCGGTTTGTTTTAAACGTGGT	COG1253(P:Inorganic ion transport and metabolism )		COG1253(CBS Domain protein)		K16302	CNNM		PF01595.17(DUF21:Domain of unknown function DUF21); PF00571.25(CBS:CBS domain)	GO:0016021(cellular_component:integral component of membrane)	gi|731346036|ref|XP_010684242.1|( PREDICTED: DUF21 domain-containing protein At4g14240 isoform X1 [Beta vulgaris subsp. vulgaris])	gi|75253981|sp|Q67XQ0.1|Y4424_ARATH(RecName: Full=DUF21 domain-containing protein At4g14240; AltName: Full=CBS domain-containing protein CBSDUF1)
miR399k	TRINITY_DN86988_c0_g5	2.8	1	21	1864	1884	TGCCAAAGGAAATTTGCCCCG	:|||||||:|*|:||||||*|	GCGGTTTCTTCTGAACGGGAC								PF10914.5(DUF2781:Protein of unknown function (DUF2781))	GO:0016020(cellular_component:membrane)	gi|902152673|gb|KNA05625.1|( hypothetical protein SOVF_188630 [Spinacia oleracea])	gi|82182937|sp|Q6DFQ5.1|TMM97_XENTR(RecName: Full=Transmembrane protein 97)
miR399k	TRINITY_DN92262_c3_g1	2.8	1	21	2704	2724	TGCCAAAGGAAATTTGCCCCG	*|||||||||||||*||**|:	CCGGTTTCCTTTAATCGTTGT					K00640	cysE	map00270(Cysteine and methionine metabolism); map00920(Sulfur metabolism)	PF06426.11(SATase_N:Serine acetyltransferase, N-terminal); PF00132.21(Hexapep:Bacterial transferase hexapeptide (six repeats)); PF14602.3(Hexapep_2:Hexapeptide repeat of succinyl-transferase)	GO:0016746(molecular_function:transferase activity, transferring acyl groups)	gi|731328833|ref|XP_010675269.1|( PREDICTED: serine acetyltransferase 5 [Beta vulgaris subsp. vulgaris])	gi|75102737|sp|Q42538.1|SAT5_ARATH(RecName: Full=Serine acetyltransferase 5; Short=AtSAT-5; AltName: Full=AtSERAT1;1; AltName: Full=SAT-c)
miR164c	TRINITY_DN85935_c0_g3	2.8	1	21	1364	1383	TGGAGAAGCAGGGTACGTGCA	|||||||||||**||||*:||	ACCTCTTCGTCAGATGC-TGT	COG1012(C:Energy production and conversion )		COG1012(Dehydrogenase)		K14085	ALDH7A1	map00310(Lysine degradation); map00280(Valine, leucine and isoleucine degradation); map00071(Fatty acid degradation); map00340(Histidine metabolism); map00330(Arginine and proline metabolism); map00053(Ascorbate and aldarate metabolism); map00410(beta-Alanine metabolism); map00010(Glycolysis / Gluconeogenesis); map00620(Pyruvate metabolism); map00260(Glycine, serine and threonine metabolism); map…	PF00171.19(Aldedh:Aldehyde dehydrogenase family)	GO:0016620(molecular_function:oxidoreductase activity, acting on the aldehyde or oxo group of donors, NAD or NADP as acceptor); GO:0055114(biological_process:oxidation-reduction process)	gi|731348057|ref|XP_010685301.1|( PREDICTED: aldehyde dehydrogenase family 7 member B4 [Beta vulgaris subsp. vulgaris])	gi|25090061|sp|Q9SYG7.3|AL7B4_ARATH(RecName: Full=Aldehyde dehydrogenase family 7 member B4; AltName: Full=Antiquitin-1; AltName: Full=Turgor-responsive ALDH)
miR164c	TRINITY_DN86051_c0_g2	2.8	1	21	297	316	TGGAGAAGCAGGGTACGTGCA	|:||:||||||*|||||:*||	ATCTTTTCGTCACATGCG-GT		NOG109947(S:Function unknown )		NOG109947(cytoplasmic membrane protein)				PF09835.6(DUF2062:Uncharacterized protein conserved in bacteria (DUF2062))	GO:0008270(molecular_function:zinc ion binding); GO:0016874(molecular_function:ligase activity); GO:0016021(cellular_component:integral component of membrane)	gi|703158705|ref|XP_010112059.1|( E3 ubiquitin-protein ligase ATL59 [Morus notabilis])	_
miR164c	TRINITY_DN86333_c1_g1	2.8	1	21	642	663	TGGAGAAGCAGGGTACGT-GCA	::*||||||||||||||**|||	GTGTCTTCGTCCCATGCTTCGT										gi|902179599|gb|KNA09380.1|( hypothetical protein SOVF_154110 [Spinacia oleracea])	gi|75151183|sp|Q8GXC7.1|FBK50_ARATH(RecName: Full=F-box/kelch-repeat protein At3g06240)
miR164c	TRINITY_DN86757_c0_g2	2.8	1	21	316	336	TGGAGAAGCAGGGTACGTGCA	||:||||||||||||*|:*|*	ACTTCTTCGTCCCATACGAGG					K01681	ACO, acnA	map00020(Citrate cycle (TCA cycle)); map00630(Glyoxylate and dicarboxylate metabolism)	PF00694.16(Aconitase_C:Aconitase C-terminal domain); PF00330.17(Aconitase:Aconitase family (aconitate hydratase))	GO:0046872(molecular_function:metal ion binding); GO:0006099(biological_process:tricarboxylic acid cycle); GO:0051539(molecular_function:4 iron, 4 sulfur cluster binding); GO:0003994(molecular_function:aconitate hydratase activity); GO:0005739(cellular_component:mitochondrion)	gi|326503140|dbj|BAJ99195.1|( predicted protein [Hordeum vulgare subsp. vulgare])	gi|586946283|sp|C8VG90.1|ACON_EMENI(RecName: Full=Aconitate hydratase, mitochondrial; Short=Aconitase; AltName: Full=Citrate hydro-lyase; AltName: Full=Homocitrate dehydratase; Flags: Precursor)
miR164c	TRINITY_DN89696_c0_g3	2.8	1	21	1706	1726	TGGAGAAGCAGGGTACGTGCA	:|||||||||||||**||*||	GCCTCTTCGTCCCAAACAAGT					K11584	PPP2R5	map03015(mRNA surveillance pathway)	PF01603.17(B56:Protein phosphatase 2A regulatory B subunit (B56 family))	GO:0000159(cellular_component:protein phosphatase type 2A complex); GO:0034047(biological_process:regulation of protein phosphatase type 2A activity); GO:0007165(biological_process:signal transduction)	gi|731343421|ref|XP_010682883.1|( PREDICTED: serine/threonine protein phosphatase 2A 57 kDa regulatory subunit B' theta isoform-like [Beta vulgaris subsp. vulgaris])	gi|75274192|sp|Q9LU89.1|2A5N_ARATH(RecName: Full=Serine/threonine protein phosphatase 2A 59 kDa regulatory subunit B' eta isoform; Short=AtB' eta; Short=PP2A, B' subunit, eta isoform)
miR164c	TRINITY_DN92256_c1_g4	2.8	1	21	3114	3134	TGGAGAAGCAGGGTACGTGCA	|||||||||||:|:|*||:*|	ACCTCTTCGTCTCGTACATCT					K00963	UGP2, galU, galF	map00520(Amino sugar and nucleotide sugar metabolism); map00040(Pentose and glucuronate interconversions); map00500(Starch and sucrose metabolism); map00052(Galactose metabolism)	PF01704.15(UDPGP:UTP--glucose-1-phosphate uridylyltransferase)	GO:0003983(molecular_function:UTP:glucose-1-phosphate uridylyltransferase activity); GO:0006011(biological_process:UDP-glucose metabolic process)	gi|965665814|dbj|BAT81302.1|( hypothetical protein VIGAN_03098900 [Vigna angularis var. angularis])	gi|136739|sp|P19595.3|UGPA_SOLTU(RecName: Full=UTP--glucose-1-phosphate uridylyltransferase; AltName: Full=UDP-glucose pyrophosphorylase; Short=UDPGP; Short=UGPase)
miR159a	TRINITY_DN78321_c0_g1	2.8	1	21	960	979	TTTGGATTGAAGGGAGCTCTA	||||||*|||||||||*|*:|	AAACCTTACTTCCCTC-ATGT								PF03478.15(DUF295:Protein of unknown function (DUF295))		gi|902175353|gb|KNA08572.1|( hypothetical protein SOVF_161500 [Spinacia oleracea])	_
miR159a	TRINITY_DN92135_c1_g4	2.8	1	21	1972	1991	TTTGGATTGAAGGGAGCTCTA	:|||||||:||||:||*|*||	GAACCTAATTTCCTTCTA-AT								PF14226.3(DIOX_N:non-haem dioxygenase in morphine synthesis N-terminal); PF03171.17(2OG-FeII_Oxy:2OG-Fe(II) oxygenase superfamily)	GO:0051213(molecular_function:dioxygenase activity); GO:0055114(biological_process:oxidation-reduction process); GO:0005506(molecular_function:iron ion binding)	gi|902217806|gb|KNA17878.1|( hypothetical protein SOVF_075540 [Spinacia oleracea])	gi|6166164|sp|Q96330.1|FLS1_ARATH(RecName: Full=Flavonol synthase/flavanone 3-hydroxylase; AltName: Full=FLS 1)
miR159a	TRINITY_DN92601_c0_g4	2.8	1	21	5651	5670	TTTGGATTGAAGGGAGCTCTA	:|||||**|||||||||*|||	GAACCTTTCTTCCCTCG-GAT					K17592	SACS		PF13920.3(zf-C3HC4_3:Zinc finger, C3HC4 type (RING finger)); PF14447.3(Prok-RING_4:Prokaryotic RING finger family 4)	GO:0008270(molecular_function:zinc ion binding)	gi|731354632|ref|XP_010688704.1|( PREDICTED: sacsin [Beta vulgaris subsp. vulgaris])	gi|122066060|sp|Q9NZJ4.2|SACS_HUMAN(RecName: Full=Sacsin; AltName: Full=DnaJ homolog subfamily C member 29; Short=DNAJC29)
miR396b-3p	TRINITY_DN83961_c0_g1	2.8	1	21	1035	1054	GCTCAAGAAAGCTGTGGGAAA	:*||||||||||||||**|||	TTAGTTCTTTCGACAC-ATTT								PF00141.20(peroxidase:Peroxidase)	GO:0016758(molecular_function:transferase activity, transferring hexosyl groups); GO:0008152(biological_process:metabolic process)	gi|902171326|gb|KNA07989.1|( hypothetical protein SOVF_166760 [Spinacia oleracea])	gi|25453218|sp|Q9SK52.1|PER18_ARATH(RecName: Full=Peroxidase 18; Short=Atperox P18; Flags: Precursor)
miR396b-3p	TRINITY_DN84053_c0_g1	2.8	1	21	1808	1829	GCTCAAGAAAGCTGTGGGA-AA	:|||||||*||||:||:||*||	TGAGTTCTATCGATACTCTCTT	COG5537(D:Cell cycle control, cell division, chromosome partitioning )		COG5537(Stromal antigen)		K06671	STAG1_2, SCC3, IRR1		PF08514.8(STAG:STAG domain); PF12717.4(Cnd1:non-SMC mitotic condensation complex subunit 1)	GO:0043229(cellular_component:intracellular organelle); GO:0045132(biological_process:meiotic chromosome segregation)	gi|902235226|gb|KNA23818.1|( hypothetical protein SOVF_021720 [Spinacia oleracea])	gi|75100587|sp|O82265.2|SCC3_ARATH(RecName: Full=Sister-chromatid cohesion protein 3; Short=AtSCC3; AltName: Full=Stromalin protein)
[truncated: 1,335 more rows]

## Sheet: Sheet2
query	target	score	query_start	query_end	target_start	target_end	nr	swissprot
miR159a	TRINITY_DN82007_c0_g1	3	1	21	18	37	gi|6942190|gb|AAF32350.1|AF219972_1(AF219972_1 CDPK substrate protein 1 [Mesembryanthemum crystallinum])	gi|1042851640|sp|F4J3P7.1|PHLD_ARATH(RecName: Full=Myb family transcription factor PHL13; AltName: Full=Protein PHR1-LIKE 13)
[truncated: 20 more rows]

## Sheet: Sheet3
miR156a
miR156a-3p
miR156a-5p
miR156b-3p
miR156c-3p
miR156e
miR156l-5p
miR159a
miR159b-5p
miR159c
miR159d
miR160b-3p
miR160c-3p
miR160d
miR160d-5p
[truncated: 76 more rows]
