# Supplementary material for: Integrated Analyses of miRNAome and Transcriptome Reveal The Function of miRNAs in Morphogenesis of Organs and Defense of Endophytes in Pseudostellaria Heterophylla
Source: Research Square preprint supplement (doi:10.21203/rs.3.rs-239755/v1), 2021-03-01
Supplement: Supplementary file 14 [file ea216198c6afe8ed8066c100.docx]

**Integrated analyses of miRNAome and transcriptome reveal the function of miRNAs in morphogenesis of organs and defense of endophytes in *Pseudostellaria heterophylla***

Jun Li*, Chongmin Wang, Tao Zhou, Haijun Jin, Xiaoqing Liu

Guizhou University of Traditional Chinese Medicine, Guiyang, 550025

* Corresponding author: [speker@163.com](mailto:speker@163.com)

**Additional files**

**Additional file 1: Conserved miRNAs in P. heterophylla.**

**Additional file 2: Detailed information of identified novel miRNAs.**

**Additional file 3: Target gene of conserved miRNAs.**

**Additional file 4: Target gene of novel miRNAs.**

**Additional file 5: Unigenes targeted by numbers of miRNAs.**

**Additional file 6: GO analysis of predicted target genes of miRNAs in *P. heterophylla*.**

**Additional file 7: KEGG analysis of predicted target genes of miRNAs in *P. heterophylla*.**

**Additional file 8: Expression correlation analysis between miRNAs and their target gene.**

**Additional file 9: Upregulated miRNAs and their target gene in ground parts and underground miRNAs and their target gene in underground parts.**

**Additional file 10: Upregulated and downregulated miRNAs and their target gene in leaf.**

**Additional file 11: Upregulated and downregulated miRNAs and their target gene in stem.**

**Additional file 12: Upregulated and downregulated miRNAs and their target gene in xylem of tuberous root.**

**Additional file 13: Upregulated and downregulated miRNAs and their target gene in bark of tuberous root.**

**Additional file 14: miRNAs and target gene in biosynthesis of plant hormone. Additional file 15: Gene from four endophytes targeted by miRNAs of *P. heterophylla*.**

**Additional file 16: Primers used to amplify cleavage products of miRNA target genes in *P. heterophylla* through 5' RLM-RACE.**
