# Supplementary material for: Integrated Analyses of miRNAome and Transcriptome Reveal The Function of miRNAs in Morphogenesis of Organs and Defense of Endophytes in Pseudostellaria Heterophylla
Source: Research Square preprint supplement (doi:10.21203/rs.3.rs-239755/v1), 2021-03-01
Supplement: Supplementary file 15 [file 1b7903a1ca47ae85c50d3293.xlsx]

## Sheet: Fusarium_oxysporum
miRNAs	target(gene ID)	score	query_start	query_end	target_start	target_end	query_seq	align	target_seq	NR
miR1439	XM_031193030.1	1.5	1	21	796	815	TTTTGGAACGGAGTGAGTATT	||||||||*||||||||*|||	AAAACCTTACCTCACTC-TAA	uncharacterized protein (FOYG_15038)
miR156a-5p	XM_031217087.1	1.8	1	20	1352	1370	TGACAGAAGAGAGTGAGCAC	:||||:||||||||:|||*|	GCTGTTTTCTCTCATTCG-G	Linalool dehydratase/isomerase
miR156a-5p	XM_031215088.1	2	1	20	246	264	TGACAGAAGAGAGTGAGCAC	*:|||||||||||||||*|*	CTTGTCTTCTCTCACTC-TA	suppressor of mrs2-1 mutation
miR156c-3p	XM_031193951.1	2	1	22	1080	1101	TGCTTACTCTCTATCTGTCACC	|||:||||*|||||||||||*|	ACGGATGACAGATAGACAGTAG	NRRL 32931 uncharacterized protein (FOYG_15878)
miR156h	XM_031189847.1	2	1	20	450	469	TGACAGAAGAAAGAGAGCAC	||||||||:|||*||||*||	ACTGTCTTTTTTATCTCCTG	putative CYC8-general repressor of transcription
miR156h	XM_031189846.1	2	1	20	454	473	TGACAGAAGAAAGAGAGCAC	||||||||:|||*||||*||	ACTGTCTTTTTTATCTCCTG	uncharacterized protein (FOYG_12260)
miR156h	XM_031189845.1	2	1	20	454	473	TGACAGAAGAAAGAGAGCAC	||||||||:|||*||||*||	ACTGTCTTTTTTATCTCCTG	uncharacterized protein (FOYG_12260)
miR156h	XM_031189844.1	2	1	20	444	463	TGACAGAAGAAAGAGAGCAC	||||||||:|||*||||*||	ACTGTCTTTTTTATCTCCTG	uncharacterized protein (FOYG_12260)
miR156h	XM_031189843.1	2	1	20	454	473	TGACAGAAGAAAGAGAGCAC	||||||||:|||*||||*||	ACTGTCTTTTTTATCTCCTG	uncharacterized protein (FOYG_12260)
miR156h	XM_031189842.1	2	1	20	454	473	TGACAGAAGAAAGAGAGCAC	||||||||:|||*||||*||	ACTGTCTTTTTTATCTCCTG	uncharacterized protein (FOYG_12260)
miR156l-5p	XM_031215088.1	1.5	1	21	245	264	CGACAGAAGAGAGTGAGCATA	*:|||||||||||||||*|||	CTTGTCTTCTCTCACTC-TAT	uncharacterized protein (FOIG_13915)
miR156l-5p	XM_031217087.1	1.8	1	21	1351	1370	CGACAGAAGAGAGTGAGCATA	|||||:||||||||:|||*:|	GCTGTTTTCTCTCATTCG-GT	uncharacterized protein (FOIG_15700)
miR166e-5p	XM_031189999.1	2	1	21	339	359	GGAATGTTGGCTGGCTCGAGG	:||||:|||||:|:||||||:	TCTTATAACCGGCTGAGCTCT	amyloid beta protein binding protein 1 (FOYG_12351)
miR169j	XM_031215883.1	1.8	1	21	1486	1506	TAGCCAAGGATGACTTGCCTG	:|||||||||:|||:||*|||	GTCGGTTCCTGCTGGACAGAC	uncharacterized protein (FOIG_14614)
miR170-3p	XM_031215076.1	1.8	1	21	1540	1560	TGATTGAGCCGTGTCAATATC	||||:||||||||*|||||:|	ACTAGCTCGGCACCGTTATGG	uncharacterized protein (FOIG_13902)
miR171a	XM_031215718.1	2	1	21	912	931	TGAGCCGCGCCAATATCACAT	||||||*||||||||||*||*	ACTCGGAGCGGTTATAG-GTT	myo-inositol transport protein ITR1
miR171a	XM_031215716.1	2	1	21	924	943	TGAGCCGCGCCAATATCACAT	||||||*||||||||||*||*	ACTCGGAGCGGTTATAG-GTT	myo-inositol transport protein ITR1
miR171a	XM_031215717.1	2	1	21	912	931	TGAGCCGCGCCAATATCACAT	||||||*||||||||||*||*	ACTCGGAGCGGTTATAG-GTT	myo-inositol transport protein ITR1
miR171e-3p	XM_031215076.1	1.8	1	21	1540	1560	TGATTGAGCCGTGCCAATATC	||||:||||||||*|||||:|	ACTAGCTCGGCACCGTTATGG	30S ribosomal protein S17-like protein
miR393a-3p	XM_031216617.1	2	1	21	1429	1448	ATCATGCTATCCCTTTGGATT	*|||||||||||||:||**||	CAGTACGATAGGGAGAC-GAA	uncharacterized protein FOIG_15264
miR396a-5p	XM_031190375.1	2	1	21	2644	2663	TTCCACAGCTTTCTTGAACTG	|||||||:|||:|||||*|*|	AAGGTGTTGAAGGAACT-GTC	uncharacterized protein FOYG
miR399j	XM_031193827.1	2	1	21	644	664	CGCCAAAGAAGATTTGCCCCG	|:||||*|||||||||||*||	GTGGTTGCTTCTAAACGGAGC	uncharacterized protein FOYG_15764
miR414	XM_031194366.1	1.2	1	21	120	140	TCATCCTCATCATCCTCGTCC	||||||||*||||||||:|||	AGTAGGAGCAGTAGGAGTAGG	Histone H2A.Z-specific chaperone chz1
miR414	XM_031216475.1	2	1	21	788	808	TCATCCTCATCATCCTCGTCC	|||||||||||||||*|*||*	AGTAGGAGTAGTAGGCGAAGC	uncharacterized protein
miR414	XM_031190492.1	2	1	21	2559	2578	TCATCCTCATCATCCTCGTCC	|||||||||||||*|:||*||	AGTAGGAGTAGTATGGGC-GG	transcription factor IIIB
miR414	XM_031189992.1	2	1	21	2136	2156	TCATCCTCATCATCCTCGTCC	|||||*|||||*|||||||||	AGTAGTAGTAGCAGGAGCAGG	Golgi apyrase
miR5077	XM_031191915.1	2	1	19	640	658	GTTCGCGTCGGGTTCACCA	||||||:|||:|||||*||	CAAGCGTAGCTCAAGTCGT	uncharacterized protein FOYG_13988
Nov-m0026-3p	XM_031217032.1	1.5	1	24	202	224	AGAAGTATCTGACACGGGTGACTC	|||||:||||||||||:*||||||	TCTTCGTAGACTGTGCT-ACTGAG	Adenine deaminase
Nov-m0051-3p	XM_031189969.1	2	1	21	1456	1476	CGCCAAAGAAGACTTGCCCTG	||*|||||||||||:||*|||	GCTGTTTCTTCTGAGCGCGAC	hypothetical protein BFJ65_g12600
Nov-m0052-3p	XM_031189969.1	2	1	21	1456	1476	CGCCAAAGAAGACTTGCCCTG	||*|||||||||||:||*|||	GCTGTTTCTTCTGAGCGCGAC	hypothetical protein BFJ65_g12600
Nov-m0097-3p	XM_031190427.1	1.5	1	22	3234	3254	TGAGACAAAAACGATAAACTGA	*|||||||||||||:|||*|||	TCTCTGTTTTTGCTGTTT-ACT	hypothetical protein FOXG_11615
Nov-m0104-3p	XM_031192439.1	1	1	24	151	173	ATAGAGAAATGAATGACACAGAGG	||||||||||||||||||*||*||	TATCTCTTTACTTACTGT-TCGCC	pectin lyase F
Nov-m0106-5p	XM_031191172.1	2	1	22	120	141	GGGAATATTGTTTTAATGGATG	|||||||||*|:|||||:||:|	CCCTTATAAGAGAATTATCTGC	Alanine--tRNA ligase
Nov-m0142-3p	XM_031215802.1	2	1	20	64	83	AGGGATGGAAGGGCGGGGGC	||:|*||||||||||||||*	TCTCAACCTTCCCGCCCCCT	hypothetical protein FOXG_03952
Nov-m0149-5p	XM_031191292.1	1	1	21	1095	1114	ATGCCAATTTGCAGAGCAAGT	|:|||||||||||||||||*|	TGCGGTTAAACGTCTCGTT-A	quinate transport protein
Nov-m0149-5p	XM_031216926.1	2	1	21	375	395	ATGCCAATTTGCAGAGCAAGT	*|:||||:|:|||||||||||	CATGGTTGAGCGTCTCGTTCA	uncharacterized protein FOIG_15552
Nov-m0179-5p	XM_031190076.1	1.8	1	23	2721	2742	TGATTCCAGAGTCGTGGTGATTC	*||||||||||||||||*:|||*	CCTAAGGTCTCAGCACC-TTAAC	nicotinamide mononucleotide permease
Nov-m0199-5p	XM_031194047.1	2	1	23	76	99	GGAAATACTCATGATCAACA-CCA	|:|||||||||||||||*||*|*|	CTTTTATGAGTACTAGTGGTAGCT	integral membrane protein pth11
Nov-m0214-5p	XM_031191292.1	1	1	21	1095	1114	ATGCCAATTTGCAGAGCAAGT	|:|||||||||||||||||*|	TGCGGTTAAACGTCTCGTT-A	quinate transport protein
Nov-m0214-5p	XM_031216926.1	2	1	21	375	395	ATGCCAATTTGCAGAGCAAGT	*|:||||:|:|||||||||||	CATGGTTGAGCGTCTCGTTCA	uncharacterized protein FOIG_15552
Nov-m0257-5p	JK747241.1	2	1	21	82	102	GTAAATCAACGAACAAATCCT	|:|*|||||||||||||||*|	CGTGTAGTTGCTTGTTTAGTA	hypothetical protein BFJ69_g17670
Nov-m0261-5p	XM_031216551.1	2	1	22	1195	1216	TGGAATTTAGGGTCGATCGACT	||||||:|||:|||||*|||||	ACCTTAGATCTCAGCTTGCTGA	uncharacterized protein FOIG_15215
Nov-m0271-5p	XM_031214506.1	1.8	1	20	603	622	GGAATTTGAGTCGATCGACT	:|||||||||||:*||||||	TCTTAAACTCAGTAAGCTGA	uncharacterized protein FOIG_13354
Nov-m0283-5p	XM_031193515.1	2	1	23	440	463	ATCAGATCGGTCAAAGCT-CGGTG	|||||||*||:|||||||*|||||	TAGTCTACCCGGTTTCGACGCCAC	uncharacterized protein FOYG_15494
Nov-m0283-5p	XM_031193514.1	2	1	23	496	519	ATCAGATCGGTCAAAGCT-CGGTG	|||||||*||:|||||||*|||||	TAGTCTACCCGGTTTCGACGCCAC	uncharacterized protein FOYG_15494

## Sheet: Microbotryum_violaceum
miRNAs	target(gene ID)	score	query_start	query_end	target_start	target_end	query_seq	align	target_seq	nr
miR1426	CU377351.1	2	1	21	127	146	AGAATCTTGATGATGATTAAA	|:||:||||||||||||*|*|	TTTTGGAACTACTACTA-TCT	none
miR156h	CU369843.1	2	1	20	554	573	TGACAGAAGAAAGAGAGCAC	*:|||||||||||||||**|	CTTGTCTTCTTTCTCTCTCG	syntaxin 1B/2/3
miR156h	CU375654.1	2	1	20	343	362	TGACAGAAGAAAGAGAGCAC	*:|||||||||||||||**|	CTTGTCTTCTTTCTCTCTCG	hypothetical protein, variant
miR156h	CU377443.1	2	1	20	325	344	TGACAGAAGAAAGAGAGCAC	*:|||||||||||||||**|	CTTGTCTTCTTTCTCTCTCG	none
miR156h	CU378265.1	2	1	20	250	269	TGACAGAAGAAAGAGAGCAC	*:|||||||||||||||**|	CTTGTCTTCTTTCTCTCTCG	none
miR156h	CU387626.1	2	1	20	324	343	TGACAGAAGAAAGAGAGCAC	*:|||||||||||||||**|	CTTGTCTTCTTTCTCTCTCG	none
miR156h	CU387765.1	2	1	20	174	193	TGACAGAAGAAAGAGAGCAC	*:|||||||||||||||**|	CTTGTCTTCTTTCTCTCTCG	none
miR156h	CU389739.1	2	1	20	289	308	TGACAGAAGAAAGAGAGCAC	*:|||||||||||||||**|	CTTGTCTTCTTTCTCTCTCG	none
miR156h	CU390023.1	2	1	20	366	385	TGACAGAAGAAAGAGAGCAC	*:|||||||||||||||**|	CTTGTCTTCTTTCTCTCTCG	BQ5605_C001g00402
miR156h	FP581541.1	2	1	20	109	128	TGACAGAAGAAAGAGAGCAC	*:|||||||||||||||**|	CTTGTCTTCTTTCTCTCTCG	hypothetical protein
miR160a-3p	CU386725.1	0.8	1	21	26	46	GCGTGCAAGGAGCCAAGCATG	:||||||||:|||||||||||	TGCACGTTCTTCGGTTCGTAC	none
miR160d-3p	CU386725.1	1.2	1	21	26	46	GCGTGCGAGGAGCCAAGCATG	:|||||:||:|||||||||||	TGCACGTTCTTCGGTTCGTAC	none
miR169aa	FP581011.1	1.8	1	21	518	538	GAGCCAAGAATGACTTGTCGG	|||||||||*|||||:||||:	CTCGGTTCTGACTGAGCAGCT	Diphthamide biosynthesis protein 3
miR169j	FP579402.1	2	1	21	428	448	TAGCCAAGGATGACTTGCCTG	|||*||||||:||||:|||||	ATCTGTTCCTGCTGAGCGGAC	none
miR172b	CU370968.1	2	1	21	83	103	GGAATCTTGATGATGCTGCAT	||||||*|||:|||||||*||	CCTTAGTACTGCTACGACCTA	hypothetical protein MVLG_00432
miR172b	CU389463.1	2	1	21	248	268	GGAATCTTGATGATGCTGCAT	||||||*|||:|||||||*||	CCTTAGTACTGCTACGACCTA	none
miR172b	FP574253.1	2	1	21	449	469	GGAATCTTGATGATGCTGCAT	||||||*|||:|||||||*||	CCTTAGTACTGCTACGACCTA	BZ3500_MvSof-1268-A1-R1_Chr1-1g01076
miR172b	FP575084.1	2	1	21	57	76	GGAATCTTGATGATGCTGCAT	*||||*|||||||||||*|||	ACTTACAACTACTACGA-GTA	BZ3501_MvSof-1269-A2-R1_Chr12-3g03597
miR172b	FP575319.1	2	1	21	4	23	GGAATCTTGATGATGCTGCAT	*||||*|||||||||||*|||	ACTTACAACTACTACGA-GTA	ASF1-like histone chaperone
miR172b	FP581726.1	2	1	21	62	82	GGAATCTTGATGATGCTGCAT	||||||*|||:|||||||*||	CCTTAGTACTGCTACGACCTA	SUR7/PalI family-domain-containing protein
miR172b	FP583094.1	2	1	21	45	64	GGAATCTTGATGATGCTGCAT	*||||*|||||||||||*|||	ACTTACAACTACTACGA-GTA	ASF1-like histone chaperone
miR395c	FP575649.1	2	1	21	56	75	CTGAAGTGTTTGGGGGGACTC	*||||||||||||||||*|**	AACTTCACAAACCCCCC-GCC	DNA-directed RNA polymerase II
miR396a-5p	CU367934.1	1.8	1	21	115	135	TTCCACAGCTTTCTTGAACTG	:||||||:|:|||||||*|||	GAGGTGTTGGAAGAACTGGAC	BQ5605_C004g02784
miR396a-5p	CU375751.1	1.8	1	21	26	46	TTCCACAGCTTTCTTGAACTG	:||||||:|:|||||||*|||	GAGGTGTTGGAAGAACTGGAC	none
miR396a-5p	CU381295.1	1.8	1	21	47	67	TTCCACAGCTTTCTTGAACTG	:||||||:|:|||||||*|||	GAGGTGTTGGAAGAACTGGAC	BQ5605_C004g02784
miR396g-5p	FP582484.1	2	1	21	196	215	TTCCACGGCTTTCTTGAACTT	:||||||:|:|||||||*|:|	GAGGTGCTGGAAGAACT-GGA	hypothetical protein MVLG_03899
miR399n	FP579238.1	2	1	21	775	795	TGCCAAAGGAGAGCTGCCCTA	|||||||||||||*|||**||	ACGGTTTCCTCTCTACGCCAT	prenylated rab acceptor PRA1
miR414	CU381367.1	1	1	21	74	94	TCATCCTCATCATCCTCGTCC	|||||||||||*|||||||||	AGTAGGAGTAGGAGGAGCAGG	BQ5605_C003g01912
miR414	FP581015.1	1	1	21	476	496	TCATCCTCATCATCCTCGTCC	|||||||||||*|||||||||	AGTAGGAGTAGAAGGAGCAGG	hypothetical protein, variant
miR414	FP581981.1	1	1	21	488	508	TCATCCTCATCATCCTCGTCC	|||||||||||*|||||||||	AGTAGGAGTAGAAGGAGCAGG	hypothetical protein MVLG_02899
miR414	FP576371.1	1.2	1	21	245	265	TCATCCTCATCATCCTCGTCC	||||*||||||||||||:|||	AGTATGAGTAGTAGGAGTAGG	BZ3500_MvSof-1268-A1-R1_Chr1-2g01420
miR414	FP579415.1	1.2	1	21	345	365	TCATCCTCATCATCCTCGTCC	:|||||||||||||*||||||	GGTAGGAGTAGTAGCAGCAGG	hypothetical protein MVLG_06671
miR414	FP580279.1	1.2	1	21	516	536	TCATCCTCATCATCCTCGTCC	||||*||||||||||||:|||	AGTATGAGTAGTAGGAGTAGG	histone-fold-containing protein
miR414	CU378076.1	1.5	1	21	44	63	TCATCCTCATCATCCTCGTCC	||*||||||||||||||*|||	AGCAGGAGTAGTAGGAG-AGG	none
miR414	FP566849.1	1.5	1	21	104	124	TCATCCTCATCATCCTCGTCC	|||||||||||*||||||||*	AGTAGGAGTAGGAGGAGCAGA	none
miR414	FP575597.1	1.5	1	21	693	713	TCATCCTCATCATCCTCGTCC	||||||||||||||*|||||*	AGTAGGAGTAGTAGTAGCAGC	BZ3500_MvSof-1268-A1-R1_Chr3-1g06045
miR414	FP577618.1	1.5	1	21	120	139	TCATCCTCATCATCCTCGTCC	||||||||||||||||*|*||	AGTAGGAGTAGTAGGATC-GG	BQ5605_C013g07238
miR414	FP580525.1	1.5	1	21	545	565	TCATCCTCATCATCCTCGTCC	|||||||||||*||||||||*	AGTAGGAGTAGCAGGAGCAGC	NAP-domain-containing protein
miR414	FP581136.1	1.5	1	21	574	594	TCATCCTCATCATCCTCGTCC	|||||||||||||*|||*|||	AGTAGGAGTAGTAAGAGGAGG	BZ3501_MvSof-1269-A2-R1_Chr9g10528
miR414	CU369669.1	1.8	1	21	30	49	TCATCCTCATCATCCTCGTCC	||*||||||||||||||*:||	AGAAGGAGTAGTAGGAG-GGG	none
miR414	CU380854.1	1.8	1	21	241	261	TCATCCTCATCATCCTCGTCC	||||||||*||||||||:|*|	AGTAGGAGGAGTAGGAGTAAG	hypothetical protein
miR414	CU386687.1	1.8	1	21	196	216	TCATCCTCATCATCCTCGTCC	|||:||||*||||||||:|||	AGTGGGAGGAGTAGGAGTAGG	hypothetical protein MVLG_05294
miR414	FP572478.1	1.8	1	21	198	217	TCATCCTCATCATCCTCGTCC	||||||||*||||||||*:||	AGTAGGAGGAGTAGGAG-GGG	pre-mRNA-splicing factor CLF1
miR414	FP578361.1	1.8	1	21	399	419	TCATCCTCATCATCCTCGTCC	||||||||||||*||||:*||	AGTAGGAGTAGTCGGAGTTGG	hypothetical protein MVLG_04169
miR414	CU368047.1	2	1	21	259	279	TCATCCTCATCATCCTCGTCC	|||||*|||||||||||*||*	AGTAGAAGTAGTAGGAGAAGA	membrane protein
miR414	CU369615.1	2	1	21	144	164	TCATCCTCATCATCCTCGTCC	|||||*|||||||||||*||*	AGTAGAAGTAGTAGGAGAAGA	membrane protein
miR414	CU370128.1	2	1	21	86	106	TCATCCTCATCATCCTCGTCC	|||||*|||||||||||*||*	AGTAGAAGTAGTAGGAGAAGA	membrane protein
miR414	CU370662.1	2	1	21	152	172	TCATCCTCATCATCCTCGTCC	|||||*|||||||||||*||*	AGTAGAAGTAGTAGGAGAAGA	membrane protein
miR414	CU370723.1	2	1	21	259	280	TCATCCTCATCATCCTCGTC-C	||||||||||||||*||*||*|	AGTAGGAGTAGTAGTAGAAGAG	serine/threonine/tyrosine-interacting protein
miR414	CU372299.1	2	1	21	143	163	TCATCCTCATCATCCTCGTCC	||||||||*||||||||**||	AGTAGGAGGAGTAGGAGGCGG	BQ5605_C032g11084
miR414	CU373644.1	2	1	21	83	104	TCATCCTCATCATCCTCGTC-C	||||||||||||||*||*||*|	AGTAGGAGTAGTAGTAGAAGAG	hypothetical protein MVLG_05718
miR414	CU374744.1	2	1	21	169	189	TCATCCTCATCATCCTCGTCC	||||||||*||||||||**||	AGTAGGAGGAGTAGGAGGCGG	BQ5605_C006g03836
miR414	CU376067.1	2	1	21	156	176	TCATCCTCATCATCCTCGTCC	||||||||*|||||*||||||	AGTAGGAGAAGTAGAAGCAGG	none
miR414	CU376953.1	2	1	21	89	109	TCATCCTCATCATCCTCGTCC	|||||*|||||||||||*||*	AGTAGAAGTAGTAGGAGAAGA	membrane protein
miR414	CU378771.1	2	1	21	130	149	TCATCCTCATCATCCTCGTCC	||||||||*:|||||||*|||	AGTAGGAGGGGTAGGAG-AGG	STE/STE20/YSK protein kinase, variant
miR414	CU379423.1	2	1	21	69	89	TCATCCTCATCATCCTCGTCC	|||||*|||||||||||*||*	AGTAGAAGTAGTAGGAGAAGA	membrane protein
miR414	CU380621.1	2	1	21	37	57	TCATCCTCATCATCCTCGTCC	*||||*||||||||||||||*	CGTAGCAGTAGTAGGAGCAGT	none
miR414	CU381179.1	2	1	21	182	202	TCATCCTCATCATCCTCGTCC	||||||||*||||||||**||	AGTAGGAGGAGTAGGAGGCGG	BQ5605_C006g03836
miR414	CU384393.1	2	1	21	265	286	TCATCCTCATCATCCTCGTC-C	||||||||||||||*||*||*|	AGTAGGAGTAGTAGTAGAAGAG	serine/threonine/tyrosine-interacting protein
miR414	CU385515.1	2	1	21	54	74	TCATCCTCATCATCCTCGTCC	||||||||*|||||*||||||	AGTAGGAGAAGTAGAAGCAGG	none
miR414	CU388507.1	2	1	21	163	184	TCATCCTCATCATCCTCGTC-C	||||||||||||||*||*||*|	AGTAGGAGTAGTAGTAGGAGAG	hypothetical protein MVLG_05718
miR414	FP568944.1	2	1	21	92	112	TCATCCTCATCATCCTCGTCC	|||||*|||||||||||*||*	AGTAGAAGTAGTAGGAGAAGA	membrane protein
miR414	FP570029.1	2	1	21	118	138	TCATCCTCATCATCCTCGTCC	|||:||||||||:||||*||*	AGTGGGAGTAGTGGGAGGAGT	none
miR414	FP571913.1	2	1	21	409	429	TCATCCTCATCATCCTCGTCC	||||||||*|||||*||||||	AGTAGGAGCAGTAGCAGCAGG	BZ3500_MvSof-1268-A1-R1_Chr8-2g10110
miR414	FP572846.1	2	1	21	259	279	TCATCCTCATCATCCTCGTCC	|||||*|||||||||||*||*	AGTAGTAGTAGTAGGAGGAGT	BZ3500_MvSof-1268-A1-R1_Chr2-1g04653
miR414	FP573148.1	2	1	21	210	230	TCATCCTCATCATCCTCGTCC	|||||||||||*|||||*||*	AGTAGGAGTAGCAGGAGGAGT	BQ5605_C032g11057
miR414	FP575264.1	2	1	21	87	107	TCATCCTCATCATCCTCGTCC	|||||*|||:|||||||*|||	AGTAGTAGTGGTAGGAGGAGG	none
miR414	FP575661.1	2	1	21	1116	1136	TCATCCTCATCATCCTCGTCC	|||||*|||||||||||*||*	AGTAGCAGTAGTAGGAGAAGC	P-loop containing nucleoside triphosphate hydrolase protein
miR414	FP579185.1	2	1	21	499	519	TCATCCTCATCATCCTCGTCC	|||||*||*||||||||||||	AGTAGTAGCAGTAGGAGCAGG	WD40 repeat-like protein
miR414	FP580094.1	2	1	21	38	58	TCATCCTCATCATCCTCGTCC	|||||*|||||||||||*||*	AGTAGAAGTAGTAGGAGAAGA	membrane protein
Nov-m0128-5p	CU374054.1	2	1	23	31	53	AGCTTTCATGTAATGTTTCTGAG	||||||||*||||||||*|||*|	TCGAAAGTTCATTACAACGACGC	none
Nov-m0128-5p	CU388611.1	2	1	23	31	53	AGCTTTCATGTAATGTTTCTGAG	||||||||*||||||||*|||*|	TCGAAAGTTCATTACAACGACGC	none
Nov-m0129-5p	CU374054.1	2	1	23	31	53	AGCTTTCATGTAATGTTTCTGAG	||||||||*||||||||*|||*|	TCGAAAGTTCATTACAACGACGC	none
Nov-m0129-5p	CU388611.1	2	1	23	31	53	AGCTTTCATGTAATGTTTCTGAG	||||||||*||||||||*|||*|	TCGAAAGTTCATTACAACGACGC	hypothetical protein MVLG_00432
Nov-m0142-3p	FP582708.1	2	1	20	500	519	AGGGATGGAAGGGCGGGGGC	||||*|||||||:||||||*	TCCCAACCTTCCTGCCCCCC	non-B type DNA binding protein
Nov-m0186-3p	FP573905.1	2	1	20	379	398	TCTTGAGTCGATCGACTGGG	:||:|||||||||:|||*|:	GGAGCTCAGCTAGTTGAGCT	BAR adaptor protein
Nov-m0186-3p	FP574921.1	2	1	20	274	293	TCTTGAGTCGATCGACTGGG	||||||||||*||||||**|	AGAACTCAGCGAGCTGAAGC	guanine nucleotide exchange factor LTE1
Nov-m0194-5p	FP577137.1	2	1	23	224	246	GAAAGGGAATGGGAAAATAAGCC	||||||:||||||*||||*||||	CTTTCCTTTACCCGTTTACTCGG	BQ5605_C001g00112
Nov-m0195-5p	FP577137.1	2	1	23	224	246	GAAAGGGAATGGGAAAATAAGCC	||||||:||||||*||||*||||	CTTTCCTTTACCCGTTTACTCGG	BQ5605_C001g00112
Nov-m0230-5p	FP577542.1	2	1	22	247	267	GAGAAGTCCTCTGATCAGCATC	||:||||||||:|||||:*|:|	CTTTTCAGGAGGCTAGTT-TGG	BQ5605_C004g03104
Nov-m0230-5p	FP582463.1	2	1	22	225	245	GAGAAGTCCTCTGATCAGCATC	||:||||||||:|||||:*|:|	CTTTTCAGGAGGCTAGTT-TGG	BQ5605_C004g03104
Nov-m0231-5p	FP577542.1	2	1	22	247	267	GAGAAGTCCTCTGATCAGCATC	||:||||||||:|||||:*|:|	CTTTTCAGGAGGCTAGTT-TGG	BQ5605_C004g03104
Nov-m0231-5p	FP582463.1	2	1	22	225	245	GAGAAGTCCTCTGATCAGCATC	||:||||||||:|||||:*|:|	CTTTTCAGGAGGCTAGTT-TGG	BQ5605_C004g03104
Nov-m0238-3p	CU378021.1	2	1	22	484	505	GATGTTACTTGACACGATAGAC	||||||||||||*||:||*|||	CTACAATGAACTCTGTTAACTG	hypothetical protein MVLG_05164
Nov-m0240-3p	FP570566.1	2	1	22	312	332	TGACAGTGACTCCATCTGGTCC	:|||||||||||||||*|:*||	GCTGTCACTGAGGTAG-CTTGG	BZ3500_MvSof-1268-A1-R1_Chr8-2g10296
Nov-m0260-5p	FP572716.1	2	1	22	548	570	AAGGACCAAGCCTTAACC-AAGC	*||||||||||||*||||*||||	CTCCTGGTTCGGACTTGGTTTCG	none
Nov-m0278-3p	FP566880.1	2	1	22	74	95	TGGACCCGATCAAATACTTGTT	|||||*||||||||:|||||*|	ACCTGAGCTAGTTTGTGAACTA	BZ3501_MvSof-1269-A2-R1_Chr10-2g02607

## Sheet: Leptosphaeria_maculans
MiRNAs	target(gene ID)	score	query_start	query_end	target_start	target_end	query_seq	align	target_seq	nr
miR414	XM_003844457.1	0.5	1	21	3429	3449	TCATCCTCATCATCCTCGTCC	|||||||||:|||||||||||	AGTAGGAGTGGTAGGAGCAGG	predicted protein
miR414	XM_003842530.1	1	1	21	1344	1364	TCATCCTCATCATCCTCGTCC	|||||||||||*|||||||||	AGTAGGAGTAGCAGGAGCAGG	ribosome biogenesis protein (Bms1)
miR414	XM_003840142.1	1	1	21	543	563	TCATCCTCATCATCCTCGTCC	|||||||||||||||:|*|||	AGTAGGAGTAGTAGGGGGAGG	DUF4211 domain containing protein
miR414	XM_003845181.1	1.2	1	21	2694	2714	TCATCCTCATCATCCTCGTCC	:||:|||||:|||||||||||	GGTGGGAGTGGTAGGAGCAGG	Rad4-domain-containing protein
miR414	XM_003843509.1	1.2	1	21	237	257	TCATCCTCATCATCCTCGTCC	||||||||||||||*||:|||	AGTAGGAGTAGTAGTAGTAGG	predicted protein
miR414	XM_003843509.1	1.2	1	21	213	233	TCATCCTCATCATCCTCGTCC	|||||*|||||||||||:|||	AGTAGTAGTAGTAGGAGTAGG	predicted protein
miR414	XM_003843509.1	1.2	1	21	174	194	TCATCCTCATCATCCTCGTCC	|||||*|||||||||||:|||	AGTAGTAGTAGTAGGAGTAGG	predicted protein
miR414	XM_003843509.1	1.2	1	21	108	128	TCATCCTCATCATCCTCGTCC	||||||||||||||*||:|||	AGTAGGAGTAGTAGTAGTAGG	predicted protein
miR414	XM_003843509.1	1.2	1	21	63	83	TCATCCTCATCATCCTCGTCC	|||||*|||||||||||:|||	AGTAGTAGTAGTAGGAGTAGG	predicted protein
miR414	XM_003839321.1	1.2	1	21	850	869	TCATCCTCATCATCCTCGTCC	|||||||||||||||||:*|*	AGTAGGAGTAGTAGGAGT-GA	FK506-binding protein 3
miR414	FQ072922.1	1.2	1	21	344	364	TCATCCTCATCATCCTCGTCC	||||||||*||||||||:|||	AGTAGGAGGAGTAGGAGTAGG	none
Nov-m0051-5p	FQ036081.1	1.2	1	21	357	378	GGGCAGTTCTTCTTTGGC-AGA	:||||||||||||||||**|||	TCCGTCAAGAAGAAACCCTTCT	FAD dependent oxidoreductase
Nov-m0052-5p	FQ036081.1	1.2	1	21	357	378	GGGCAGTTCTTCTTTGGC-AGA	:||||||||||||||||**|||	TCCGTCAAGAAGAAACCCTTCT	FAD dependent oxidoreductase
miR414	XM_003845674.1	1.5	1	21	518	538	TCATCCTCATCATCCTCGTCC	:|||||:||||||||:|:|||	GGTAGGGGTAGTAGGGGTAGG	hypothetical protein T440DRAFT_465668
miR414	XM_003844509.1	1.5	1	21	4482	4502	TCATCCTCATCATCCTCGTCC	||||||||*|||||||||||*	AGTAGGAGCAGTAGGAGCAGT	leucine permease transcriptional regulator protein
miR414	XM_003843032.1	1.5	1	21	906	926	TCATCCTCATCATCCTCGTCC	||||||||*|||||||||||*	AGTAGGAGCAGTAGGAGCAGT	hypothetical protein LEMA_P088400.1
miR414	XM_003841334.1	1.5	1	21	74	94	TCATCCTCATCATCCTCGTCC	|||||*||||||||||||||*	AGTAGTAGTAGTAGGAGCAGT	predicted protein
miR414	FQ071681.1	1.5	1	21	327	347	TCATCCTCATCATCCTCGTCC	||||||||*|||||||||||*	AGTAGGAGCAGTAGGAGCAGT	hypothetical protein LEMA_P022080.1
miR414	FQ063506.1	1.5	1	21	424	443	TCATCCTCATCATCCTCGTCC	*||||||||:|||||||*|||	CGTAGGAGTGGTAGGAG-AGG	40S ribosomal protein S8-1-like
miR414	FQ040355.1	1.5	1	21	450	470	TCATCCTCATCATCCTCGTCC	|||||||||||||||:|*||*	AGTAGGAGTAGTAGGGGGAGC	predicted protein
miR156h	XM_003843186.1	1.8	1	20	1309	1327	TGACAGAAGAAAGAGAGCAC	:|||||||:||||||||*|*	GCTGTCTTTTTTCTCTC-TC	DUF590-domain-containing protein
miR168a-3p	FQ057145.1	1.8	1	21	27	47	CCCGCCTTGCATCAACTGAAT	|||:||:||||||||||*||:	GGGTGGGACGTAGTTGAGTTG	meckelin [Planoprotostelium fungivorum]
miR169b-3p	XM_003842484.1	1.8	1	20	473	491	GGCAGGTTGTTCTTGGCTAC	|||||:||||:||||||:*|	CCGTCTAACAGGAACCGG-G	predicted protein
miR172e-5p	XM_003841075.1	1.8	1	20	121	140	GCAGCACCATTAAGATTCAC	:|||||||||:|||||||**	TGTCGTGGTAGTTCTAAGAA	hypothetical protein LEMA_P090530.1
miR414	XM_003843509.1	1.8	1	21	264	284	TCATCCTCATCATCCTCGTCC	||||||||||||||*||:||*	AGTAGGAGTAGTAGTAGTAGT	predicted protein
miR414	XM_003843509.1	1.8	1	21	144	164	TCATCCTCATCATCCTCGTCC	||||||||||||||*||:||*	AGTAGGAGTAGTAGTAGTAGT	predicted protein
miR414	XM_003842245.1	1.8	1	21	153	173	TCATCCTCATCATCCTCGTCC	:||||||||:||||*||||||	GGTAGGAGTGGTAGTAGCAGG	predicted protein
miR414	FQ039590.1	1.8	1	21	97	117	TCATCCTCATCATCCTCGTCC	:||:|||||:|||||||*|||	GGTGGGAGTGGTAGGAGGAGG	Rad4-domain-containing protein
Nov-m0149-5p	XM_003843647.1	1.8	1	21	3414	3434	ATGCCAATTTGCAGAGCAAGT	||:|||||*|||||||||||:	TATGGTTACACGTCTCGTTCG	ABC transporter
Nov-m0149-5p	EF441346.1	1.8	1	21	3574	3594	ATGCCAATTTGCAGAGCAAGT	||:|||||*|||||||||||:	TATGGTTACACGTCTCGTTCG	ABC transporter
Nov-m0189-5p	XM_003843386.1	1.8	1	21	303	324	TTTTGCATAGGCCATCAA-GTA	||||||||*|||||||||*|:|	AAAACGTAGCCGGTAGTTTCGT	predicted protein
Nov-m0190-5p	XM_003843386.1	1.8	1	21	303	324	TTTTGCATAGGCCATCAA-GTA	||||||||*|||||||||*|:|	AAAACGTAGCCGGTAGTTTCGT	predicted protein
Nov-m0214-5p	XM_003843647.1	1.8	1	21	3414	3434	ATGCCAATTTGCAGAGCAAGT	||:|||||*|||||||||||:	TATGGTTACACGTCTCGTTCG	ABC transporter
Nov-m0214-5p	EF441346.1	1.8	1	21	3574	3594	ATGCCAATTTGCAGAGCAAGT	||:|||||*|||||||||||:	TATGGTTACACGTCTCGTTCG	ABC transporter
Nov-m0261-5p	XM_003845455.1	1.8	1	22	278	299	TGGAATTTAGGGTCGATCGACT	|:|||||*||||||||||:|||	ATCTTAACTCCCAGCTAGTTGA	acyltransferase-domain-containing protein
miR160g	XM_003840528.1	2	1	21	794	814	TGCCTGGCTCCTTGTATGCCA	|||||:||||||||*|||||*	ACGGATCGAGGAACCTACGGC	DNA mismatch repair protein msh3
miR166d	XM_003841648.1	2	1	21	1049	1069	TCGGGCCAGGCTTCATCCCCC	||||||||||||*||||*|*|	AGCCCGGTCCGACGTAGTGAG	predicted protein
miR167	XM_003844218.1	2	1	21	4100	4120	GGAAGCTGCCAGCATGATCCT	*||||||||||||||*|||*|	ACTTCGACGGTCGTAGTAGTA	SNF2 family ATP-dependent chromatin-remodeling factor snf21
miR167	FQ071734.1	2	1	21	204	224	GGAAGCTGCCAGCATGATCCT	*||||||||||||||*|||*|	ACTTCGACGGTCGTAGTAGTA	SNF2 family ATP-dependent chromatin-remodeling factor snf21
miR167	FQ071429.1	2	1	21	204	224	GGAAGCTGCCAGCATGATCCT	*||||||||||||||*|||*|	ACTTCGACGGTCGTAGTAGTA	SNF2 family ATP-dependent chromatin-remodeling factor snf21
miR167d	XM_003844218.1	2	1	22	4098	4120	TGAAGCTGCCAGCATGATC-TGG	|||||||||||||||*|||*|::	ACTTCGACGGTCGTAGTAGTATT	SNF2 family ATP-dependent chromatin-remodeling factor snf21
miR167d	FQ071734.1	2	1	22	202	224	TGAAGCTGCCAGCATGATC-TGG	|||||||||||||||*|||*|::	ACTTCGACGGTCGTAGTAGTATT	SNF2 family ATP-dependent chromatin-remodeling factor snf21
miR167d	FQ071429.1	2	1	22	202	224	TGAAGCTGCCAGCATGATC-TGG	|||||||||||||||*|||*|::	ACTTCGACGGTCGTAGTAGTATT	SNF2 family ATP-dependent chromatin-remodeling factor snf21
miR168b-5p	XM_003840072.1	2	1	21	821	841	TCGCTTGGTGCAGGTCGGGAA	:|:|||*|||||||||||:||	GGTGAAACACGTCCAGCCTTT	Ankyrin and HET domain protein
miR169a-3p	XM_003841426.1	2	1	20	964	983	GGCAAGTTGTCCTTGGCTAC	*:|||:|||:||||||||||	ATGTTTAACGGGAACCGATG	exonuclease-like protein
miR172a	XM_003839202.1	2	1	21	2070	2089	AGAATCCTGATGATGCTGCAG	*|||:|||||||||||:||*|	CCTTGGGACTACTACGGCG-C	fungal transcription factor
miR172b	XM_003839202.1	2	1	21	2069	2089	GGAATCTTGATGATGCTGCAT	||||:|:|||||||||:||*|	CCTTGGGACTACTACGGCGCA	fungal transcription factor
miR172c	XM_003841499.1	2	1	21	963	982	AGAATCTTGATGATGCTGCAG	||||:|||||||*|||||*||	TCTTGGAACTACGACGAC-TC	hypothetical protein LEMA_P094770.1
miR391-5p	XM_003840161.1	2	1	21	313	333	TTCGCAGGAGAGATAGCGCCA	*||||||||||||:||*||||	CAGCGTCCTCTCTGTCCCGGT	glutamate-rich WD repeat containing protein 1
miR394a-5p	XM_003839933.1	2	1	20	1456	1475	TTGGCATTCTGTCCACCTCC	||||||||||||||||*|**	AACCGTAAGACAGGTGCACA	WD40 repeat-like protein
miR396a-5p	XM_003843498.1	2	1	21	1146	1166	TTCCACAGCTTTCTTGAACTG	|||||||||||*||::|||||	AAGGTGTCGAACGAGTTTGAC	26S protease regulatory subunit 8
miR396a-5p	FQ064944.1	2	1	21	653	673	TTCCACAGCTTTCTTGAACTG	|||||||||||*||::|||||	AAGGTGTCGAACGAGTTTGAC	26S protease regulatory subunit 8
miR3979-3p	XM_003843511.1	2	1	20	170	189	CTTCGGGGGAGGAGAGAAGC	|||*|||||||||||||*|*	GAAACCCCCTCCTCTCTCCT	predicted protein
miR399e	XM_003843497.1	2	1	21	1048	1069	CGCCAAAGGAGAGTTGCCC-TC	*|||||||:|||||:||||*||	CCGGTTTCTTCTCAGCGGGAAG	calcium permease family membrane transporter
miR414	XM_003845696.1	2	1	21	2625	2645	TCATCCTCATCATCCTCGTCC	||*|||||*||||||||||||	AGAAGGAGGAGTAGGAGCAGG	autophagy protein Apg9
miR414	XM_003844391.1	2	1	21	1339	1358	TCATCCTCATCATCCTCGTCC	*|||||||*|||||||||*||	CGTAGGAGGAGTAGGAGC-GG	centromere/microtubule-binding protein cbf5
miR414	XM_003843340.1	2	1	21	894	914	TCATCCTCATCATCCTCGTCC	||||||||*||||||||*||*	AGTAGGAGCAGTAGGAGAAGT	Stress response protein nst1
miR414	XM_003842991.1	2	1	21	1518	1538	TCATCCTCATCATCCTCGTCC	:|||||||*:||||||||:||	GGTAGGAGCGGTAGGAGCGGG	UBX domain containing protein
miR414	XM_003842133.1	2	1	21	324	344	TCATCCTCATCATCCTCGTCC	*|||||:||||*|||||||||	CGTAGGGGTAGAAGGAGCAGG	DUF1760-domain-containing protein
miR414	XM_003841277.1	2	1	21	805	824	TCATCCTCATCATCCTCGTCC	||||||||||||||*|||*|*	AGTAGGAGTAGTAGAAGC-GA	predicted protein
miR414	FQ073345.1	2	1	21	11	31	TCATCCTCATCATCCTCGTCC	*|||||||*|||||||||||*	CGTAGGAGAAGTAGGAGCAGC	hypothetical protein BKA77_0886
miR414	FQ051805.1	2	1	21	68	87	TCATCCTCATCATCCTCGTCC	||||||:|*||||||||*|||	AGTAGGGGCAGTAGGAG-AGG	none
miR414	FQ051347.1	2	1	21	173	194	TCATCCTCATCATCCTCGTC-C	*|||||*|||||||||||||*|	CGTAGGCGTAGTAGGAGCAGAG	Phosphomevalonate kinase
miR414	FQ037746.1	2	1	21	590	611	TCATCCTCATCATCCTCGTC-C	*|||||*|||||||||||||*|	CGTAGGCGTAGTAGGAGCAGAG	Phosphomevalonate kinase
miR414	FQ037217.1	2	1	21	145	164	TCATCCTCATCATCCTCGTCC	||||||:|*||||||||*|||	AGTAGGGGCAGTAGGAG-AGG	tetraspanin
miR414	FQ036749.1	2	1	21	84	104	TCATCCTCATCATCCTCGTCC	||*||||||||||||||*||*	AGCAGGAGTAGTAGGAGGAGT	none
miR414	FQ035679.1	2	1	21	8	28	TCATCCTCATCATCCTCGTCC	||*||||||||||||||*||*	AGCAGGAGTAGTAGGAGGAGT	none
miR414	FQ035143.1	2	1	21	76	95	TCATCCTCATCATCCTCGTCC	||||||:|*||||||||*|||	AGTAGGGGCAGTAGGAG-AGG	none
miR414	FQ034040.1	2	1	21	451	471	TCATCCTCATCATCCTCGTCC	||||||||||||:|*|||||*	AGTAGGAGTAGTGGTAGCAGC	hypothetical protein LEMA_P065160.1
Nov-m0051-5p	XM_003845354.1	2	1	21	58	78	GGGCAGTTCTTCTTTGGCAGA	|||||||*|||||*|||||||	CCCGTCACGAAGACACCGTCT	U3 small nucleolar ribonucleoprotein protein Lcp5
Nov-m0052-5p	XM_003845354.1	2	1	21	58	78	GGGCAGTTCTTCTTTGGCAGA	|||||||*|||||*|||||||	CCCGTCACGAAGACACCGTCT
Nov-m0132-3p	XM_003841432.1	2	1	22	1526	1548	AAACGTAAACAACATGATGT-AT	|||||||||||*|||||*||*||	TTTGCATTTGTGGTACTCCATTA	glycerol:H+ symporter-like protein
Nov-m0142-3p	XM_003845030.1	2	1	20	1136	1154	AGGGATGGAAGGGCGGGGGC	|||||*|||||||||:|*||	TCCCTCCCTTCCCGCTC-CG	flavin dependent monooxygenase-like protein
Nov-m0187-3p	XM_003844580.1	2	1	22	1754	1776	GAGATTCGAGTCGATCGA-CTGG	*||||:||||||||||||**|||	ATCTAGGCTCAGCTAGCTTAACC	ubiquinone biosynthesis protein coq-8
Nov-m0229-3p	XM_003839588.1	2	1	22	651	671	TGGCCTGTGGCTGTTTTGGGAG	||||||||||*:||||||||*|	ACCGGACACCCGCAAAACCC-C	hypothetical protein LEMA_P110760.1
Nov-m0248-3p	XM_003845704.1	2	1	20	2155	2174	TCGGGGGGGTGGGTGCAGGG	||||||:|||||||||*::|	AGCCCCTCCACCCACGCTTC	D-xylulose 5-phosphate/D-fructose 6-phosphate phosphoketolase
Nov-m0248-3p	XM_003842560.1	2	1	20	636	655	TCGGGGGGGTGGGTGCAGGG	||||||||:|:|||:||||*	AGCCCCCCTATCCATGTCCA	carbohydrate-binding module family 18 protein
Nov-m0248-3p	FQ063906.1	2	1	20	316	335	TCGGGGGGGTGGGTGCAGGG	||||||:|||||||||*::|	AGCCCCTCCACCCACGCTTC	D-xylulose 5-phosphate/D-fructose 6-phosphate phosphoketolase
Nov-m0248-3p	FQ059743.1	2	1	20	470	488	TCGGGGGGGTGGGTGCAGGG	|||::|||||||||||*|||	AGCTTCCCCACCCACG-CCC	DUF1761-domain-containing protein
Nov-m0248-3p	FQ058717.1	2	1	20	470	488	TCGGGGGGGTGGGTGCAGGG	|||::|||||||||||*|||	AGCTTCCCCACCCACG-CCC	DUF1761-domain-containing protein
Nov-m0248-3p	EC091596.1	2	1	20	533	553	TCGGGGGGGTGGGTGCAG-GG	|||*|||||||||||||**||	AGCACCCCCACCCACGTAACC	hypothetical protein LEMA_P107390.1

## Sheet: Rhodosporidium_toruloides
miRNAs	target(gene ID)	score	query_start	query_end	target_start	target_end	query_seq	align	target_seq	nr
miR414	XM_016415951.1	1	1	21	531	551	TCATCCTCATCATCCTCGTCC	|||||||||||*|||||||||	AGTAGGAGTAGCAGGAGCAGG	RNA polymerase-associated protein RTF1
miR414	XM_016418169.1	1	1	21	1038	1058	TCATCCTCATCATCCTCGTCC	|||||||||||||||||||**	AGTAGGAGTAGTAGGAGCACA	hypothetical protein RHTO_04503
miR414	XM_016419525.1	1	1	21	483	503	TCATCCTCATCATCCTCGTCC	||||||||*||||||||||||	AGTAGGAGGAGTAGGAGCAGG	hypothetical protein RHTO_05864
miR166g-5p	XM_016420909.1	1.5	1	21	916	935	GGAATGTTGTCTGGCTCGAGG	|||||||||||::|||||*||	CCTTACAACAGGTCGAGC-CC	hypothetical protein RHTO_07251
miR414	XM_016413973.1	1.5	1	21	276	296	TCATCCTCATCATCCTCGTCC	||*:|||||||||||||||||	AGAGGGAGTAGTAGGAGCAGG	breast cancer 2 susceptibility protein
miR414	XM_016414908.1	1.5	1	21	701	722	TCATCCTCATCATCCTCGTC-C	|||||||||||*||||||||*|	AGTAGGAGTAGGAGGAGCAGCG	Phospholipid binding protein
miR414	XM_016416118.1	1.5	1	21	13610	13631	TCATCCTCATCATCCTCGTC-C	|||||||||||*||||||||*|	AGTAGGAGTAGGAGGAGCAGTG	midasin
miR169b-3p	XM_016421180.1	1.8	1	20	1195	1214	GGCAGGTTGTTCTTGGCTAC	:|||||:||||||||||*|*	TCGTCCGACAAGAACCGTTA	hypothetical protein RHTO_07524
miR395	XM_016419852.1	1.8	1	20	1022	1041	CTGAAGCGTTTGGGGGAAGG	|||||||||:|||:|||*|:	GACTTCGCAGACCTCCTGCT	hypothetical protein RHTO_06191
miR399a	XM_016415095.1	1.8	1	21	83	103	TGCCAAAGGAGAATTGCCCTG	|||||||||*|||||||*|:|	ACGGTTTCCACTTAACGCGGC	exosome complex component RRP46
Nov-m0207-3p	XM_016420949.1	1.8	1	22	666	687	CAGAGTTCCGCCCGGTCGGGCG	||||||:|||||||||*||:||	GTCTCAGGGCGGGCCAACCTGC	starch binding domain protein
Nov-m0268-5p	XM_016414053.1	1.8	1	21	547	567	GTGCCAGTCGATCGACTCGAT	||*||||||||||||||*||:	CAGGGTCAGCTAGCTGACCTG	microtubule binding protein
miR156j	XM_016415900.1	2	1	20	869	887	TGACAGAAGAGGGTGAGCAC	||*||||||||||||||**|	ACGGTCTTCTCCCACTC-CG	Lipid-binding START domain protein
miR165a-3p	XM_016414907.1	2	1	21	2795	2815	TCGGACCAGGCTTCATCCCCC	*||*||||||||||||||||*	CGCGTGGTCCGAAGTAGGGGA	enhancer of polycomb-like protein
miR165a-5p	XM_016419148.1	2	1	21	1120	1139	GGAATGTTGTCTGGATCGAGG	||||||:||*||||||||*||	CCTTACGACCGACCTAGC-CC	MYB-like domain containing protein
miR165a-5p	XM_016421788.1	2	1	21	1191	1211	GGAATGTTGTCTGGATCGAGG	|||*|||:|:|||||||||||	CCTGACAGCGGACCTAGCTCC	hypothetical protein RHTO_08134
miR166b-5p	XM_016421788.1	2	1	21	1191	1211	GGACTGTTGTCTGGCTCGAGG	|||||||:|:||||*||||||	CCTGACAGCGGACCTAGCTCC	hypothetical protein RHTO_08134
miR166e-5p	XM_016419148.1	2	1	21	1120	1139	GGAATGTTGGCTGGCTCGAGG	||||||:|||||||*|||*||	CCTTACGACCGACCTAGC-CC	MYB-like domain containing protein
miR168a	XM_016416631.1	2	1	21	338	358	TTGCTTGGTGCTGGTCGGGAA	|:|||||||||||*|||||*|	AGCGAACCACGACAAGCCCCT	secretory carrier-associated membrane protein
miR169a-3p	XM_016416941.1	2	1	20	520	539	GGCAAGTTGTCCTTGGCTAC	|*|||||:||||||||||*|	CAGTTCAGCAGGAACCGACG	TEA/ATTS family protein, transcription factor AbaA
miR169d-5p	XM_016416452.1	2	1	21	228	248	AAGCCAAGGATGACTTGCCGG	||||||||||||*||:||*||	TTCGGTTCCTACAGAGCGTCC	Ca2+-transporting ATPase
miR169y	XM_016416129.1	2	1	21	1074	1094	TAGCCATGGATGAATTGCCTG	*||||||||||||*|||||*|	TTCGGTACCTACTCAACGGTC	glycosyltransferase family 90 protein
miR319a-3p.2-3p	XM_016414626.1	2	1	20	865	885	TTGGACTGAAGGGTGCTC-CC	||||||:||||||||||***|	AACCTGGCTTCCCACGAACCG	folic acid synthesis protein
miR395	XM_016419869.1	2	1	20	3668	3688	CTGAAGCGTTTGGGGGAAG-G	*:||||||||:||||||||*|	AGCTTCGCAAGCCCCCTTCGC	Growth-arrest-specific protein 2 domain containing protein
miR395k	XM_016414262.1	2	1	21	915	935	GTGAAGTGTTTGGGGGAACTC	||||||*||||||:|||*|||	CACTTCCCAAACCTCCTCGAG	Proteophosphoglycan ppg4
miR395o	XM_016414262.1	2	1	21	915	935	ATGAAGTGTTTGGAGGAACTC	*|||||*||||||||||*|||	CACTTCCCAAACCTCCTCGAG	Proteophosphoglycan ppg4
miR395o	XM_016415717.1	2	1	21	5569	5589	ATGAAGTGTTTGGAGGAACTC	*|||||||||||||*|||*||	AACTTCACAAACCTGCTTCAG	hypothetical protein RHTO_02039
miR414	XM_016414214.1	2	1	21	183	203	TCATCCTCATCATCCTCGTCC	||*||||||||*|||||||||	AGGAGGAGTAGCAGGAGCAGG	hypothetical protein RHTO_00530
miR414	XM_016414688.1	2	1	21	423	443	TCATCCTCATCATCCTCGTCC	||||||**|||||||||||||	AGTAGGCTTAGTAGGAGCAGG	hypothetical protein RHTO_01004
miR414	XM_016415201.1	2	1	21	1146	1166	TCATCCTCATCATCCTCGTCC	||||||||*||*|||||||||	AGTAGGAGCAGCAGGAGCAGG	lysocardiolipin and lysophospholipid acyltransferase
miR414	XM_016416496.1	2	1	21	1227	1247	TCATCCTCATCATCCTCGTCC	||*|||||*||||||||||||	AGGAGGAGAAGTAGGAGCAGG	Procollagen-proline dioxygenase
miR414	XM_016416696.1	2	1	21	1488	1508	TCATCCTCATCATCCTCGTCC	||*||||||||*|||||||||	AGGAGGAGTAGGAGGAGCAGG	initiation factor tfiid complex 60 kda subunit
miR414	XM_016416813.1	2	1	21	1107	1127	TCATCCTCATCATCCTCGTCC	||*||||||||*|||||||||	AGAAGGAGTAGGAGGAGCAGG	hypothetical protein RHTO_03141
miR414	XM_016417336.1	2	1	21	1191	1211	TCATCCTCATCATCCTCGTCC	||||||||||||**|||||||	AGTAGGAGTAGTTTGAGCAGG	Bromodomain transcription factor
miR414	XM_016417434.1	2	1	21	885	905	TCATCCTCATCATCCTCGTCC	||||||||*||*|||||||||	AGTAGGAGGAGAAGGAGCAGG	Armadillo-type fold domain containing protein
miR414	XM_016417496.1	2	1	21	2085	2105	TCATCCTCATCATCCTCGTCC	||*||||||||||||||*||*	AGCAGGAGTAGTAGGAGGAGC	F-box domain containing protein
miR414	XM_016418648.1	2	1	21	855	875	TCATCCTCATCATCCTCGTCC	||||||||*||*|||||||||	AGTAGGAGCAGGAGGAGCAGG	DUF625 domain protein
miR414	XM_016418663.1	2	1	21	375	395	TCATCCTCATCATCCTCGTCC	||*|||||*||||||||||||	AGAAGGAGCAGTAGGAGCAGG	histone-like transcription factor (CBF/NF-Y)
miR414	XM_016419410.1	2	1	21	1830	1850	TCATCCTCATCATCCTCGTCC	*||||||||||*||||||||*	CGTAGGAGTAGGAGGAGCAGC	glycosyltransferase family 8 protein
miR414	XM_016419455.1	2	1	21	363	383	TCATCCTCATCATCCTCGTCC	||*||||||||*|||||||||	AGCAGGAGTAGGAGGAGCAGG	pre-rrna processing protein Utp22
miR414	XM_016419728.1	2	1	21	1263	1283	TCATCCTCATCATCCTCGTCC	||*||||||||*|||||||||	AGAAGGAGTAGCAGGAGCAGG	hypothetical protein RHTO_06067
miR414	XM_016419769.1	2	1	21	1915	1934	TCATCCTCATCATCCTCGTCC	||||||||*|||||||||*|*	AGTAGGAGCAGTAGGAGC-GC	Mei4-dependent protein 6
miR414	XM_016420245.1	2	1	21	1572	1592	TCATCCTCATCATCCTCGTCC	||||||||*||*|||||||||	AGTAGGAGGAGCAGGAGCAGG	WD-repeat protein
miR414	XM_016420299.1	2	1	21	528	548	TCATCCTCATCATCCTCGTCC	||||||||*||*|||||||||	AGTAGGAGGAGCAGGAGCAGG	nucleosome assembly protein 1-like 1
miR414	XM_016420536.1	2	1	21	231	251	TCATCCTCATCATCCTCGTCC	|||||||||||*|||||::*|	AGTAGGAGTAGCAGGAGTGAG	rRNA processing protein
miR414	XM_016420676.1	2	1	21	2148	2168	TCATCCTCATCATCCTCGTCC	||*|||||*||||||||||||	AGGAGGAGCAGTAGGAGCAGG	U3 small nucleolar RNA-associated protein 14
miR414	XM_016421172.1	2	1	21	656	677	TCATCCTCATCATCCTCGTC-C	|||||||||||*|||||*||*|	AGTAGGAGTAGGAGGAGGAGCG	structure-specific recognition protein 1
miR414	XM_016421439.1	2	1	21	845	865	TCATCCTCATCATCCTCGTCC	*|||||*|||||||||||*||	CGTAGGTGTAGTAGGAGCCGG	casein kinase II subunit beta
Nov-m0142-3p	XM_016415327.1	2	1	20	803	822	AGGGATGGAAGGGCGGGGGC	|||:|*|||||||||:||||	TCCTTCCCTTCCCGCTCCCG	Proteophosphoglycan 5
Nov-m0142-3p	XM_016415412.1	2	1	20	553	572	AGGGATGGAAGGGCGGGGGC	|||||*:|||||||||:|||	TCCCTCTCTTCCCGCCTCCG	nuclear pore complex protein Nup85
Nov-m0142-3p	XM_016416818.1	2	1	20	355	374	AGGGATGGAAGGGCGGGGGC	|:||||||||||||||:|**	TTCCTACCTTCCCGCCTCAT	DnaJ family protein
Nov-m0142-3p	XM_016417073.1	2	1	20	132	151	AGGGATGGAAGGGCGGGGGC	|||||*|||||||||:|*||	TCCCTCCCTTCCCGCTCGCG	Proteophosphoglycan ppg4
Nov-m0268-5p	XM_016416859.1	2	1	21	850	870	GTGCCAGTCGATCGACTCGAT	||:||||||||*||||||||*	CATGGTCAGCTTGCTGAGCTC	alpha 1,2-mannosyltransferase, glycosyltransferase family 15 protein
Nov-m0268-5p	XM_016418045.1	2	1	21	187	207	GTGCCAGTCGATCGACTCGAT	|||||*|||||:|||||||*|	CACGGGCAGCTGGCTGAGCGA	Frequency clock protein
Nov-m0268-5p	XM_016420692.1	2	1	21	2467	2487	GTGCCAGTCGATCGACTCGAT	||*||||||||||||||*||*	CAGGGTCAGCTAGCTGAACTT	AGC/Akt protein kinase
Nov-m0268-5p	XM_016421098.1	2	1	21	3118	3138	GTGCCAGTCGATCGACTCGAT	*|||*|||||||||||||||*	AACGCTCAGCTAGCTGAGCTC	DNA repair protein rad50
Nov-m0269-3p	XM_016416868.1	2	1	22	549	570	TCGATCGACCGGACTTTGAGTC	*||*||||||||||||||*|||	TGCCAGCTGGCCTGAAACCCAG	Zn(2)-C6 fungal-type transcription factor
Nov-m0271-5p	XM_016418241.1	2	1	20	1262	1280	GGAATTTGAGTCGATCGACT	*|||:|||||:||||||*||	ACTTGAACTCGGCTAGC-GA	molybdopterin biosynthesis protein MoeA
