# Supplementary material for: Integrated Analyses of miRNAome and Transcriptome Reveal The Function of miRNAs in Morphogenesis of Organs and Defense of Endophytes in Pseudostellaria Heterophylla
Source: Research Square preprint supplement (doi:10.21203/rs.3.rs-239755/v1), 2021-03-01
Supplement: Supplementary file 16 [file 267dae94a0e8ff46193e4019.xlsx]

## Sheet: Sheet1
Novel candidate miRNAs in P. heterophylla
								Expression of novel miRNA after homogenization
miRNA	miRNA sequence (5′-3′)	Length (nt)	Arm	miRNA location	LP (nt)	MFE	MFEI	B_1	B_2	B_3	L_1	L_2	L_3	S_1	S_2	S_3	X_1	X_2	X_3	TPM of each miRNA
Phn-m0001-3p	AGTTCAGTTAGGGAGTTCTCCTGC	24	3'	TRINITY_DN88671_c4_g5	77	-26.2	2.18333	0	0	0	6.32	0	0	5.49	0	0	0	0	0	11.81
Phn-m0002-5p	TACATGATACTTAGATGAGACG	22	5'	TRINITY_DN92155_c0_g1_i1	91	-23.1	2.8875	0	0	0	0	0	0	0	0	0	0	8.57	0	8.57
Phn-m0003-3p	AACTGGCATGATAGATTTCTGAGT	24	3'	TRINITY_DN88596_c1_g1_i1	76	-31.3	3.47778	0	0	14.39	0	0	0	0	0	0	0	0	0	14.39
Phn-m0004-5p	AAGCGATTTGTGTACCGTGAGAGT	24	5'	TRINITY_DN86229_c1_g5	101	-22.6	2.05455	0	0	0	5.79	0	0	0	0	0	0	0	0	5.79
Phn-m0005-3p	ACCGGTATACCGTTTGAATGGTAC	24	3'	TRINITY_DN96243_c1_g5	101	-31.2	2.83636	0	17.08	23.55	20.53	31.68	23.74	13.73	16.37	17.92	14.28	9.43	25.45	213.76
Phn-m0006-5p	AAGACCCATCCAGACTTGTCTAGA	24	5'	TRINITY_DN99841_c0_g1	100	-25.1	2.28182	0	0	0	6.32	0	0	0	0	0	0	0	0	6.32
Phn-m0007-5p	ATGGACTGTGTTGAGAATGTGGGA	24	5'	TRINITY_DN90304_c1_g3_i6	101	-34.1	3.1	0	0	0	0	0	0	6.59	0	0	0	0	0	6.59
Phn-m0008-3p	CGAGATTCTTATGACCAGTAGC	22	3'	TRINITY_DN91221_c0_g4_i3	96	-20.2	2.02	33.74	44.13	0	0	0	0	5.49	0	0	26.18	21.43	0	130.97
Phn-m0009-5p	AAAAGAGAACTGTTGTCCAAGATA	24	5'	TRINITY_DN89458_c2_g1_i1	101	-29.7	3.7125	65.6	0	40.56	15.79	14.85	19.29	0	0	20.07	11.9	10.29	10.91	209.26
Phn-m0010-5p	ATCTGGGGTAGCCTGTGCAGTGGC	24	5'	TRINITY_DN88891_c0_g3_i1	77	-24.5	1.63333	0	0	0	0	0	14.83	0	0	0	0	0	0	14.83
Phn-m0011-3p	ACGTAAACAACATGATATATCG	22	3'	TRINITY_DN86870_c1_g1_i2	96	-25.8	3.68571	0	0	0	7.37	0	0	0	0	0	0	9.43	0	16.8
Phn-m0012-5p	GAGGAGAGTTTGAACTTGTGACC	23	5'	TRINITY_DN84382_c0_g1_i1	90	-19.3	1.75455	0	0	0	5.79	0	0	0	0	7.17	0	0	0	12.96
Phn-m0013-3p	ACGTAAACAAATGACTGGAACG	22	3'	TRINITY_DN69816_c0_g1_i1	99	-19.64	2.18222	0	0	0	0	0	0	0	0	0	0	0	10	10
Phn-m0014-3p	TTAACGTGTGCTGTAAAGTTACA	23	3'	TRINITY_DN89964_c1_g1_i7	77	-28.3	3.5375	0	0	0	0	0	0	0	0	7.17	0	0	10.91	18.08
Phn-m0015-5p	AGACGATGACAGTACCTTAGGTGC	24	5'	TRINITY_DN92547_c1_g2_i1	89	-27.3	2.275	0	0	0	12.1	15.84	0	0	0	0	0	0	0	27.94
Phn-m0016-5p	GAGATTTTGTGGAACACCCTCT	22	5'	TRINITY_DN92343_c0_g7_i1	76	-18.6	1.86	0	0	0	0	0	0	6.04	0	0	0	0	0	6.04
Phn-m0017-3p	GAGAACACGATATCAAGACTCGGT	24	3'	TRINITY_DN89384_c3_g1_i1	82	-40.7	3.7	0	0	0	6.32	0	0	0	0	0	0	0	0	6.32
Phn-m0018-5p	AATCCAGTCCAGATCCAATGGATC	24	5'	TRINITY_DN90966_c3_g2_i10	91	-44.7	4.06364	0	0	0	0	0	0	0	0	7.17	0	0	0	7.17
Phn-m0019-3p	AGGGTGATATCGAGACTCGGTACC	24	3'	TRINITY_DN87874_c1_g2_i3	83	-41.8	3.21538	0	0	0	0	0	0	0	12	0	0	0	0	12
Phn-m0020-5p	ACGTAACAGGAGATCTCTTGACCC	24	5'	TRINITY_DN92160_c4_g16_i1	79	-20.1	1.675	0	0	18.32	0	0	0	0	0	0	0	0	0	18.32
Phn-m0021-5p	AATGAACCGGATCTGGACTGGATC	24	5'	TRINITY_DN92260_c1_g4_i1	77	-25.1	2.09167	0	0	14.39	15.79	19.8	0	10.98	26.19	12.9	0	0	0	100.05
Phn-m0022-5p	ATGTGATAGTTTACAGACCGAGAC	24	5'	TRINITY_DN86938_c0_g3_i1	77	-21.7	2.17	56.23	14.24	15.7	58.95	88.12	56.37	9.33	17.46	12.19	0	20.57	0	349.16
Phn-m0023-3p	GTTCTCATGTAAGATTTACTTATC	24	3'	TRINITY_DN82662_c0_g1_i1	99	-18.9	2.7	0	0	0	0	0	0	0	0	7.17	0	0	0	7.17
Phn-m0024-3p	TTTTGAACAATGTATACAACT	21	3'	TRINITY_DN87170_c0_g1_i1	82	-31.4	6.28	0	0	0	9.47	11.88	0	8.24	0	0	0	0	0	29.59
Phn-m0025-5p	TTCACCCTTTGGAAATGGCAGG	22	5'	TRINITY_DN129905_c0_g1	90	-20.4	1.85455	20.62	0	0	0	0	0	0	0	0	0	10.29	15.45	46.36
Phn-m0026-3p	AGAAGTATCTGACACGGGTGACTC	24	3'	TRINITY_DN92939_c5_g4_i1	83	-24.1	2.00833	0	0	0	8.42	20.79	14.83	0	16.37	0	0	0	0	60.41
Phn-m0027-3p	ATGTAAGCTCTGCAAGTTATACA	23	3'	TRINITY_DN86833_c1_g1_i11	86	-21.8	2.725	0	0	0	0	0	0	0	0	7.89	0	0	10	17.89
Phn-m0028-3p	AGTTAGTGGGACATGACATGGGAC	24	3'	TRINITY_DN93113_c4_g1_i13	99	-44.2	3.68333	0	0	0	11.05	13.86	16.32	8.24	10.91	0	0	0	0	60.38
Phn-m0029-3p	AACGGGAATCTTGTGACCATTATT	24	3'	TRINITY_DN77235_c0_g2_i1	89	-18.7	2.07778	0	0	0	0	0	14.83	0	0	0	0	0	0	14.83
Phn-m0030-3p	GGACAACAGATATCGTCGTTTGGT	24	3'	TRINITY_DN91386_c1_g4_i1	81	-18.9	1.71818	0	0	0	0	0	0	0	0	0	0	0	11.82	11.82
Phn-m0031-5p	GGGGAGATGGTATAACTAATGAGT	24	5'	TRINITY_DN87670_c0_g1_i4	89	-19.1	1.91	22.49	0	0	0	0	0	0	0	0	0	0	0	22.49
Phn-m0032-5p	ACTAGGGCCCAGTTCTTTTGGAAC	24	5'	TRINITY_DN92712_c1_g1_i9	91	-23.8	1.98333	0	0	0	5.26	0	0	0	0	0	0	0	0	5.26
Phn-m0033-5p	GTATTCTTTTGGACTGCGGTTCTC	24	5'	TRINITY_DN92712_c1_g1_i9	73	-25.2	2.29091	0	0	0	6.84	0	0	0	0	0	0	0	0	6.84
Phn-m0034-3p	TAAGACTCAAGACTTAACAACTCT	24	3'	TRINITY_DN91728_c5_g1_i4	101	-27.1	3.3875	0	0	0	0	0	0	14.82	0	0	0	0	0	14.82
Phn-m0035-3p	TTCCAGTCGGAGAGTTGTGTTA	22	3'	TRINITY_DN88019_c2_g2_i2	71	-19.8	1.98	0	0	0	0	0	0	0	0	0	0	0	10.91	10.91
Phn-m0035-5p	TATAGAAACTTTCGGATGCGAT	22	5'	TRINITY_DN88019_c2_g2_i2	71	-19.8	2.475	20.62	29.9	18.32	0	0	0	5.49	0	0	29.75	27.43	15.45	146.96
Phn-m0036-5p	ATGGACTGGATCTGGATTGGATC	23	5'	TRINITY_DN86818_c3_g4_i1	100	-32.3	2.93636	0	0	0	0	0	0	0	0	7.89	0	0	0	7.89
Phn-m0037-5p	AATGAGGAGATGAGATTCGAACAT	24	5'	TRINITY_DN93012_c2_g1_i4	97	-22.8	2.53333	0	0	0	0	13.86	0	0	0	0	0	0	0	13.86
Phn-m0038-5p	GAAGTACCTGACACAAGCATGTGT	24	5'	TRINITY_DN91859_c2_g2_i6	85	-33.8	3.07273	0	0	0	13.16	17.82	0	6.04	0	8.6	0	0	0	45.62
Phn-m0039-3p	ATGCTTGTGTCAGGTACTTCTAAC	24	3'	TRINITY_DN91859_c2_g2_i6	93	-29.2	2.92	0	0	0	0	10.89	0	0	0	0	0	0	0	10.89
Phn-m0040-5p	AGTTCTAACATAGGTAGACCCGGC	24	5'	TRINITY_DN92560_c7_g1_i1	97	-35.8	2.98333	0	0	0	5.79	13.86	0	0	0	0	0	0	0	19.65
Phn-m0041-5p	TGAATGATCCTGATCACGAAG	21	5'	TRINITY_DN93290_c5_g3_i1	79	-18.7	2.07778	0	0	0	0	0	0	0	0	8.6	0	0	0	8.6
Phn-m0042-5p	AATTTGTGTTGTGGGACGGCCACC	24	5'	TRINITY_DN58556_c0_g1	72	-19.1	1.46923	31.86	21.36	18.32	24.74	23.76	45.99	9.88	0	12.9	0	11.14	0	199.95
Phn-m0043-5p	ACCGAACTGTGAAATCATGCGGTT	24	5'	TRINITY_DN89623_c2_g5_i1	89	-23.2	2.10909	0	0	0	0	0	0	13.18	12	16.49	0	0	18.18	59.85
Phn-m0044-5p	TATCAACTGGGGTAATGTGAGTT	23	5'	TRINITY_DN91489_c2_g1_i1	82	-19.4	2.15556	0	0	0	6.84	9.9	0	5.49	0	0	0	0	0	22.23
Phn-m0045-3p	GAGGCACTGAGACAATGTTGTTTT	24	3'	TRINITY_DN89696_c0_g12_i1	98	-22.5	2.25	0	0	0	5.26	0	0	0	0	0	0	0	0	5.26
Phn-m0046-5p	GAAATCCATATCCAGATCCAATGG	24	5'	TRINITY_DN86665_c4_g1_i2	61	-25	2.5	33.74	15.66	20.94	10	0	0	12.63	22.92	15.77	22.61	49.72	41.82	245.81
Phn-m0047-3p	TTGATGTTTGTCGGGTTCAAACT	23	3'	TRINITY_DN90451_c1_g5_i2	98	-19.4	2.15556	39.36	0	0	6.84	0	0	12.08	14.19	0	20.23	20.57	9.09	122.36
Phn-m0048-5p	AGAATAACAAATGGAATAACAATT	24	5'	TRINITY_DN36916_c0_g1	64	-22	4.4	0	0	0	0	0	0	0	0	0	0	0	10	10
Phn-m0049-5p	ATCCGTTGGATATGGACTGGATCT	24	5'	TRINITY_DN92126_c0_g6_i1	81	-27.6	2.50909	0	0	0	0	0	0	10.43	0	0	0	0	0	10.43
Phn-m0050-5p	GAAATTAGTTATGAATGTGAATTT	24	5'	TRINITY_DN89947_c1_g5_i2	79	-19.2	3.84	0	0	0	5.26	0	0	0	0	0	0	0	0	5.26
Phn-m0051-3p	CGCCAAAGAAGACTTGCCCTG	21	3'	TRINITY_DN86988_c0_g5_i3	94	-42	3.5	209.93	0	79.82	0	0	28.19	0	103.68	16.49	61.88	0	29.09	529.08
Phn-m0051-5p	GGGCAGTTCTTCTTTGGCAGA	21	5'	TRINITY_DN86988_c0_g5_i3	94	-42	3.81818	416.12	562.36	116.45	0	229.71	23.74	0	24.01	17.92	0	439.76	0	1830.07
Phn-m0052-3p	CGCCAAAGAAGACTTGCCCTG	21	3'	TRINITY_DN86988_c0_g5_i3	94	-42	3.5	0	294.71	0	83.68	112.88	0	42.28	0	0	0	210.02	0	743.57
Phn-m0052-5p	GGGCAGTTCTTCTTTGGCAGA	21	5'	TRINITY_DN86988_c0_g5_i3	94	-42	3.81818	46.86	96.81	0	215.78	0	0	47.77	151.69	0	173.74	71.15	68.18	871.98
Phn-m0053-3p	AATAATGTTATATTTACGATCAAC	24	3'	TRINITY_DN89718_c3_g1_i1	75	-18.5	3.7	0	0	19.63	6.84	0	0	5.49	0	7.17	0	11.14	10.91	61.18
Phn-m0054-3p	GGGAGAATAAGAGGACTAACTAGT	24	3'	TRINITY_DN88693_c2_g2_i10	81	-31.1	3.11	0	0	0	0	0	0	0	0	7.17	0	8.57	9.09	24.83
Phn-m0055-3p	ACTTAATGGGATGGATCTGGACAC	24	3'	TRINITY_DN103298_c0_g1	90	-22.5	2.04545	0	0	0	0	0	0	0	0	7.17	0	0	0	7.17
Phn-m0056-3p	ATACAAGCTAAATAAGTTGAGACT	24	3'	TRINITY_DN88927_c3_g1_i3	99	-18.7	2.67143	48.73	29.9	19.63	7.89	22.77	16.32	15.37	0	9.32	15.47	16.29	10	211.69
Phn-m0057-5p	TAGGAAGAAGGCTGTGTATAGG	22	5'	TRINITY_DN89422_c2_g5_i2	72	-25.2	2.52	0	0	0	0	0	0	0	0	0	0	8.57	0	8.57
Phn-m0058-3p	GTTCTATGGTAAGACTGTTTTATC	24	3'	TRINITY_DN89997_c1_g3_i1	97	-22.3	2.7875	0	0	0	5.26	0	0	0	0	0	0	0	0	5.26
Phn-m0059-5p	CCTATTTAGAAGATTGTGACCCA	23	5'	TRINITY_DN86438_c2_g3_i1	78	-25.7	2.85556	0	0	0	0	0	0	0	0	0	0	9.43	10	19.43
Phn-m0060-5p	ATACGAATTTCCGGATATCCGAT	23	5'	TRINITY_DN90564_c1_g2_i2	72	-18.6	2.06667	0	0	0	0	0	0	0	0	0	0	9.43	0	9.43
Phn-m0061-5p	GTTAATATACGGGGTAAGGCTACG	24	5'	TRINITY_DN87561_c1_g6_i4	71	-22.2	2.01818	0	0	0	7.37	0	0	0	0	0	0	0	0	7.37
Phn-m0062-3p	ATAAGGTTACTGGACCTCGAGGGT	24	3'	TRINITY_DN86740_c0_g1_i10	96	-22.8	1.9	0	0	0	0	0	0	0	10.91	0	0	0	0	10.91
Phn-m0063-3p	GGAGTTCAACTTTATTTAGATCAG	24	3'	TRINITY_DN87285_c1_g1_i13	99	-20	2.5	0	0	0	0	10.89	0	0	0	0	0	15.43	13.64	39.96
Phn-m0064-3p	ACTCGAGATATAACGGATCTGGAC	24	3'	TRINITY_DN92462_c0_g5_i3	89	-28.7	2.60909	0	0	0	0	0	0	6.59	0	0	0	0	0	6.59
Phn-m0065-3p	ATAGTTTAGAGGGAGAGTGGCACG	24	3'	TRINITY_DN92792_c2_g1_i1	101	-23.4	1.95	0	0	14.39	0	0	0	0	0	0	0	0	0	14.39
Phn-m0066-3p	TAGAGATACTGGCACTGATAGCC	23	3'	TRINITY_DN88264_c1_g7_i1	81	-37.2	3.38182	0	0	0	0	0	0	0	12	0	0	0	0	12
Phn-m0067-3p	AATAACCTGTCTGGGGAAATTCCT	24	3'	TRINITY_DN85059_c0_g1_i1	88	-37.8	3.78	0	0	0	0	9.9	0	0	0	7.89	0	0	0	17.79
Phn-m0068-5p	AATCTGCCCGTTCTTCTGATGTGG	24	5'	TRINITY_DN87686_c1_g1_i1	83	-35.1	2.925	0	0	0	7.89	0	14.83	0	0	0	0	0	0	22.72
Phn-m0069-3p	AAACAACCTGATGTATCGGAGGG	23	3'	TRINITY_DN86357_c1_g2_i1	100	-36.4	3.30909	0	0	0	0	10.89	0	0	0	0	0	0	0	10.89
Phn-m0070-5p	AATTCTAACCTAGGAGACTTGG	22	5'	TRINITY_DN93213_c1_g1_i3	87	-23.3	2.58889	0	0	0	0	0	0	0	0	7.89	0	0	0	7.89
Phn-m0071-5p	GGACAATACACCTTGAACGGGTTT	24	5'	TRINITY_DN87071_c1_g1_i4	98	-25.5	2.31818	0	0	0	0	0	0	0	30.56	0	0	0	0	30.56
Phn-m0072-5p	GAGTGTTCCAATACTAGCGGATT	23	5'	TRINITY_DN92489_c1_g4_i2	77	-18.8	1.88	0	0	0	0	0	0	0	0	9.32	0	0	0	9.32
Phn-m0073-5p	TGAGATTTGTTCTGAGCCTC	20	5'	TRINITY_DN91770_c1_g1_i3	87	-20.9	2.32222	0	0	0	0	0	0	10.98	0	7.17	22.61	12	0	52.76
Phn-m0074-5p	AGGATCGGGATTCTACTTTGGATC	24	5'	TRINITY_DN88753_c3_g3_i2	83	-22.8	2.07273	0	0	0	6.84	0	0	0	0	0	0	0	0	6.84
Phn-m0075-3p	AAAGAACCGTTGTTTGCATACGAC	24	3'	TRINITY_DN91496_c5_g1_i1	100	-33.8	3.38	18.74	21.36	30.09	7.37	0	17.8	8.78	10.91	15.77	0	0	0	130.82
Phn-m0076-5p	AAGAACCCGTTGTTGGCATATACT	24	5'	TRINITY_DN84161_c0_g1_i1	94	-18.2	1.82	0	0	0	5.26	0	0	0	0	0	0	0	0	5.26
Phn-m0077-5p	ATCGACGCAATCTTCACCTTGGGT	24	5'	TRINITY_DN88039_c2_g1_i2	96	-23.8	1.98333	0	0	0	5.79	11.88	0	7.69	0	7.89	0	0	0	33.25
Phn-m0078-5p	ATTTCCGGTCAAAGTTTTTCAACT	24	5'	TRINITY_DN89486_c6_g1_i1	88	-20.9	2.6125	133.08	111.05	99.44	57.89	73.27	50.44	49.96	53.47	56.64	84.49	96.01	53.64	919.38
Phn-m0079-5p	TCCAGTGGTTATGACTTATCCTC	23	5'	TRINITY_DN87220_c3_g4_i2	58	-21.8	2.18	0	0	0	0	0	0	9.33	0	0	0	0	0	9.33
Phn-m0080-5p	ACTCCATTTCATGACTGCTGAG	22	5'	TRINITY_DN91093_c0_g1_i1	92	-24	2.4	101.22	61.22	70.66	5.26	0	16.32	17.02	22.92	29.39	60.69	59.15	61.82	505.67
Phn-m0081-3p	GAATTGTTCTATCAGGAAAGCTGA	24	3'	TRINITY_DN87608_c1_g2_i4	101	-22.7	2.52222	0	0	13.08	0	0	0	0	0	0	0	17.14	0	30.22
Phn-m0082-3p	AACGTGAACAATCTGATGTATC	22	3'	TRINITY_DN91165_c0_g8_i1	95	-32.6	4.075	0	0	0	7.89	13.86	0	0	0	10.75	0	0	0	32.5
Phn-m0083-5p	AAGCCCGTCTTACTTAAGAATGTT	24	5'	TRINITY_DN92245_c1_g2_i7	98	-24.8	2.75556	0	0	0	5.79	10.89	0	0	0	0	0	0	0	16.68
Phn-m0084-3p	AGGAGGTGACATGATATGGCTGAC	24	3'	TRINITY_DN86394_c5_g1_i2	99	-23.8	1.98333	0	0	0	7.37	10.89	0	9.33	26.19	0	0	0	0	53.78
Phn-m0085-3p	GGAAACTGACTTGATGTGAATTGT	24	3'	TRINITY_DN85437_c0_g2_i1	76	-21.3	2.36667	0	0	20.94	20	26.73	26.7	10.43	15.28	7.17	16.66	21.43	18.18	183.52
Phn-m0086-5p	AATTATGACGTGAGTTCTAAACCC	24	5'	TRINITY_DN116020_c0_g1	95	-27.4	3.04444	24.37	17.08	19.63	12.63	17.82	20.77	6.04	0	12.19	0	8.57	0	139.1
Phn-m0087-5p	TAAGGCCATGTTCTTTTGGACT	22	5'	TRINITY_DN90579_c0_g5_i1	79	-18.1	2.01111	0	0	0	0	0	0	0	0	0	0	0	9.09	9.09
Phn-m0088-3p	ATTGGTGACCCGATTAACTCGACC	24	3'	TRINITY_DN92260_c1_g1_i4	96	-21.6	1.8	0	0	0	0	0	0	0	0	0	0	0	10.91	10.91
Phn-m0089-5p	TCACTTTATAAACTAAGGGGACT	23	5'	TRINITY_DN28286_c0_g1_i1	94	-30.7	3.8375	0	0	0	0	0	0	6.04	0	0	0	0	0	6.04
Phn-m0090-3p	AAGAGAATTACAGTCCAAAAGAAC	24	3'	TRINITY_DN91989_c4_g1_i10	80	-18.5	2.3125	18.74	0	0	0	0	0	0	0	0	15.47	0	0	34.21
Phn-m0091-3p	AAGGAGATTGTACAAGTGGAGTCT	24	3'	TRINITY_DN89894_c4_g4_i1	87	-18.6	1.86	0	0	0	8.95	0	0	0	0	0	0	0	0	8.95
Phn-m0092-5p	CGATCCAGTTCCGAAAACGGAC	22	5'	TRINITY_DN86223_c4_g2_i1	91	-32.7	2.725	0	0	0	0	0	0	0	0	0	14.28	12.86	20	47.14
Phn-m0093-3p	AGAAAATGAGTTAACGTCACCCGA	24	3'	TRINITY_DN89006_c0_g1_i6	101	-19.2	1.92	29.99	22.78	18.32	35.26	18.81	19.29	10.43	13.1	32.98	34.51	35.15	32.73	303.35
Phn-m0094-5p	ATTACACATAATTAGACAAGTTT	23	5'	TRINITY_DN87225_c0_g3_i3	93	-20.5	4.1	0	0	0	5.26	0	0	0	0	0	0	0	0	5.26
Phn-m0095-5p	AACCGCAAATCAATCGAGGACTGG	24	5'	TRINITY_DN89860_c2_g5_i2	91	-21.2	1.76667	0	0	0	0	0	0	5.49	0	0	0	0	0	5.49
Phn-m0096-5p	AACCGCAAATCAATCGAGGACTGG	24	5'	TRINITY_DN89860_c2_g5_i1	91	-21.2	1.76667	0	0	0	0	0	0	0	0	0	0	0	10	10
Phn-m0097-3p	TGAGACAAAAACGATAAACTGA	22	3'	TRINITY_DN91631_c1_g4_i11	96	-18.4	2.62857	20.62	0	14.39	5.26	0	0	0	0	0	0	0	0	40.27
Phn-m0098-3p	ACCGTCGGTGTTTTACTTCATACC	24	3'	TRINITY_DN89103_c0_g1_i2	98	-23.3	2.11818	0	0	0	0	0	0	6.59	0	9.32	0	0	0	15.91
Phn-m0099-5p	ATTGAGAACCACTTTTTATTTAGA	24	5'	TRINITY_DN140901_c0_g1	76	-22.2	3.7	0	0	0	7.37	0	0	0	0	0	16.66	0	0	24.03
Phn-m0100-5p	ACTTAATTAGAGTTGAACCTGAGC	24	5'	TRINITY_DN90277_c0_g4_i3	70	-20.7	2.3	0	0	0	0	0	0	6.04	0	0	11.9	8.57	11.82	38.33
Phn-m0101-5p	TGAAACCGTTGTATGCATACAAG	23	5'	TRINITY_DN92230_c0_g1_i3	91	-20.5	2.27778	0	0	0	0	0	0	9.33	0	0	11.9	0	10	31.23
Phn-m0102-5p	ATTAAATGAGAACACCAACGAGGG	24	5'	TRINITY_DN88446_c2_g2_i1	85	-21.1	2.11	0	48.41	27.48	21.58	16.83	0	8.78	17.46	0	60.69	31.72	28.18	261.13
Phn-m0103-5p	AATTAAATGAGAACACCAACGAGG	24	5'	TRINITY_DN88446_c2_g2_i1	87	-21.1	2.34444	63.73	0	47.1	0	0	0	0	0	24.38	48.79	28.29	31.82	244.11
Phn-m0104-3p	ATAGAGAAATGAATGACACAGAGG	24	3'	TRINITY_DN92048_c4_g1_i11	101	-26.7	2.96667	0	0	0	6.84	0	0	0	0	0	0	0	0	6.84
Phn-m0105-3p	ACCTGTGGTGCTCAATATGCTCGC	24	3'	TRINITY_DN92485_c0_g6_i1	86	-35.6	2.73846	0	0	0	5.26	0	19.29	0	0	0	0	0	0	24.55
Phn-m0106-5p	GGGAATATTGTTTTAATGGATG	22	5'	TRINITY_DN86631_c1_g6_i1	81	-18.4	2.62857	0	0	0	6.32	10.89	0	0	0	0	0	0	0	17.21
Phn-m0107-3p	AATTAAACGTAAACAATCTGATGT	24	3'	TRINITY_DN86790_c2_g1_i2	82	-34.3	5.71667	0	14.24	17.01	0	0	0	0	0	0	23.8	0	0	55.05
Phn-m0108-3p	AATTAAACGTAAACAATCTGATGT	24	3'	TRINITY_DN86790_c2_g1_i2	82	-34.3	5.71667	18.74	0	0	12.1	11.88	0	0	0	0	13.09	17.14	0	72.95
Phn-m0109-3p	ATTGCATGTGCCCGTGGGGGATCC	24	3'	TRINITY_DN93201_c2_g1_i8	101	-42	2.8	0	28.47	0	0	0	0	0	0	10.04	0	15.43	0	53.94
Phn-m0110-3p	AATGGATAAACATGATCGTAGTTA	24	3'	TRINITY_DN92569_c2_g1_i6	101	-24.6	3.51429	61.86	34.17	35.33	22.1	39.61	17.8	16.47	25.1	0	14.28	20.57	12.73	300.02
Phn-m0111-3p	ATTTTAGGGAGTTAAGACGAGACT	24	3'	TRINITY_DN86417_c2_g1_i4	93	-37.7	4.18889	0	0	0	0	0	0	0	0	10.04	0	0	0	10.04
Phn-m0112-5p	GGACAATTATGCCCTTCATGGCT	23	5'	TRINITY_DN86146_c3_g3_i1	92	-34.1	3.1	0	0	0	0	0	0	6.04	10.91	0	0	0	0	16.95
Phn-m0113-3p	AATATGTAACCCGCGGGTCCAACC	24	3'	TRINITY_DN87557_c3_g2_i4	93	-36.8	2.83077	28.12	24.2	0	0	0	0	5.49	0	7.89	14.28	9.43	10	99.41
Phn-m0114-5p	ATAGCACCTTTGAACCTTTCAAGG	24	5'	TRINITY_DN77881_c0_g1_i2	77	-39.5	3.95	37.49	24.2	30.09	6.32	0	0	11.53	15.28	18.64	23.8	13.72	25.45	206.52
Phn-m0115-5p	ATATACCGTAGATAACATTTTCGA	24	5'	TRINITY_DN88253_c0_g1_i1	94	-19.2	2.74286	0	0	58.88	0	0	28.19	0	0	32.26	20.23	0	75.45	215.01
Phn-m0116-5p	CTTATTGTATGAGATACTTGGTA	23	5'	TRINITY_DN89637_c6_g1_i1	79	-25.3	3.61429	18.74	0	19.63	5.79	12.87	0	13.18	21.83	0	0	8.57	0	100.61
Phn-m0117-5p	ATCGGTGTAGGTACATGGCTGA	22	5'	TRINITY_DN80012_c0_g1_i1	94	-46.2	4.2	18.74	0	0	0	0	0	0	0	0	0	8.57	0	27.31
Phn-m0118-3p	TACATGGCCCTCCACTCGAGAA	22	3'	TRINITY_DN33590_c0_g1_i1	78	-24.3	2.025	26.24	0	0	0	0	0	0	0	22.23	0	61.72	41.82	152.01
Phn-m0119-3p	TACATGGCCCTCCACTCGAGAA	22	3'	TRINITY_DN33590_c0_g1_i1	78	-24.3	2.025	0	18.51	26.17	0	0	0	22.51	19.64	0	45.22	0	0	132.05
Phn-m0120-5p	CTACAATCGTTGAGCGCCCGGT	22	5'	TRINITY_DN83657_c0_g1_i2	86	-23.5	1.80769	0	0	0	0	0	0	9.33	0	0	0	0	0	9.33
Phn-m0121-5p	GGAGTGACCTGAGACCACATG	21	5'	TRINITY_DN87171_c1_g2_i21	93	-47.7	3.975	0	0	0	440.51	561.41	124.61	259.69	193.16	26.53	0	0	0	1605.91
Phn-m0122-3p	TGGATATAAATCTTTCGTGGATT	23	3'	TRINITY_DN88943_c2_g1_i5	100	-26.4	3.77143	0	0	0	0	0	0	5.49	0	0	0	0	0	5.49
Phn-m0123-3p	AAGATGAAGGCTTTTACGTAGG	22	3'	TRINITY_DN89294_c0_g8_i1	87	-28.8	3.2	119.96	68.34	70.66	44.74	29.7	26.7	33.49	52.38	47.32	76.16	96.87	37.27	703.59
Phn-m0124-3p	GAATTCTTTCCTCCTTTCGAGTGT	24	3'	TRINITY_DN87581_c1_g1_i1	87	-21.8	2.18	0	0	0	0	0	0	7.14	0	0	0	10.29	0	17.43
Phn-m0125-5p	ACCGAGTGGTACCGAGTTTCAATA	24	5'	TRINITY_DN92461_c3_g3_i2	98	-36.4	3.30909	0	0	0	0	0	16.32	0	0	7.17	0	0	0	23.49
Phn-m0126-5p	ATTTTCGATATCTCTGAGATAT	22	5'	TRINITY_DN92558_c1_g4_i12	83	-24.7	4.11667	0	0	0	0	0	0	0	0	0	11.9	0	0	11.9
Phn-m0127-5p	ACGGCTGACGTTTAACAATGC	21	5'	TRINITY_DN87557_c3_g5_i1	86	-23.5	2.35	0	0	0	0	0	0	7.69	0	0	0	0	0	7.69
Phn-m0128-5p	AGCTTTCATGTAATGTTTCTGAG	23	5'	TRINITY_DN91398_c3_g1_i1	91	-25.1	3.1375	0	32.75	43.18	23.68	34.65	31.15	0	28.37	22.94	28.56	0	26.36	271.64
Phn-m0129-5p	AGCTTTCATGTAATGTTTCTGAG	23	5'	TRINITY_DN91398_c3_g1_i1	91	-25.1	3.1375	50.61	0	0	0	0	0	26.35	0	0	0	20.57	0	97.53
Phn-m0130-3p	AAAATACTCAGAAACATTACATGA	24	3'	TRINITY_DN91398_c3_g1_i1	81	-24.8	4.13333	0	0	0	0	9.9	0	0	0	0	0	0	0	9.9
Phn-m0131-5p	ATCAAAGAAAACAATATTATTTAT	24	5'	TRINITY_DN88606_c3_g1_i2	58	-18.2	6.06667	20.62	0	0	0	0	0	0	0	0	17.85	0	0	38.47
Phn-m0132-3p	AAACGTAAACAACATGATGTAT	22	3'	TRINITY_DN89588_c6_g1_i2	81	-23.7	3.95	0	0	0	14.21	9.9	14.83	0	0	7.89	0	0	0	46.83
Phn-m0133-5p	AAGCCCGCTATTGTAACTGAACGG	24	5'	TRINITY_DN90902_c0_g2_i2	76	-24.3	2.025	0	0	0	5.26	0	0	0	0	0	0	0	0	5.26
Phn-m0134-5p	GAGAATTGATATGATGATTGTT	22	5'	TRINITY_DN70636_c0_g1_i1	94	-23.3	3.88333	0	0	0	0	0	0	0	0	11.47	0	0	0	11.47
Phn-m0135-3p	TGAGATATCTGATCTTATCCCT	22	3'	TRINITY_DN92925_c2_g3_i1	96	-34.5	4.3125	0	17.08	19.63	0	0	0	0	0	0	0	15.43	16.36	68.5
Phn-m0136-5p	AGACCGTCTCAACATTTTTATT	22	5'	TRINITY_DN86417_c1_g3_i2	77	-38	5.42857	0	14.24	0	0	0	0	0	0	0	0	0	0	14.24
Phn-m0137-3p	AGGATATTCCGGGAAAAACTTAGC	24	3'	TRINITY_DN90482_c1_g1_i1	98	-20.8	2.08	0	0	0	7.89	0	0	0	0	0	0	0	0	7.89
Phn-m0138-3p	ATGTGAGTGGGTGTCGCCGAGACT	24	3'	TRINITY_DN85693_c0_g1_i5	78	-49.8	3.55714	0	0	0	10	0	0	0	0	0	0	0	0	10
Phn-m0139-3p	ATGTGAGTGGGTGTCGCCGAGACT	24	3'	TRINITY_DN85693_c0_g1_i5	78	-49.8	3.55714	29.99	0	14.39	0	9.9	0	7.14	0	0	0	0	0	61.42
Phn-m0140-3p	GGACCAGGCTTCATTCCCCCCAA	23	3'	TRINITY_DN90053_c2_g2_i1	100	-38.9	2.77857	0	0	0	0	0	0	11.53	0	15.77	0	0	0	27.3
Phn-m0141-3p	GGACCAGGCTTCATTCCCCCCAA	23	3'	TRINITY_DN90053_c2_g2_i1	100	-38.9	2.77857	0	0	0	0	0	0	0	0	7.17	0	0	0	7.17
Phn-m0142-3p	AGGGATGGAAGGGCGGGGGC	20	3'	TRINITY_DN91807_c2_g1_i1	67	-33.2	2.21333	0	0	0	12.63	18.81	0	0	0	0	0	0	0	31.44
Phn-m0143-3p	AGGGATGGAAGGGCGGGGGCC	21	3'	TRINITY_DN91807_c2_g1_i1	69	-33.2	2.075	0	0	0	20.53	0	0	0	0	0	0	0	0	20.53
Phn-m0144-3p	AGTGTGAAACCGTCTCTTAGAAGA	24	3'	TRINITY_DN91224_c5_g3_i8	83	-19.4	1.94	20.62	17.08	0	28.42	46.54	0	0	0	0	19.04	0	0	131.7
Phn-m0145-3p	AGAACGCTTATTTAATTTAACT	22	3'	TRINITY_DN92368_c1_g2_i17	76	-30.5	6.1	0	0	0	5.79	0	0	0	19.64	0	0	0	0	25.43
Phn-m0146-3p	AGAACGCTTATTTAATTTAACT	22	3'	TRINITY_DN92368_c1_g2_i17	76	-30.5	6.1	18.74	0	0	0	0	0	17.57	0	0	28.56	15.43	0	80.3
Phn-m0147-3p	AGGGATAACGTGGAGTTCACTTTA	24	3'	TRINITY_DN91873_c2_g1_i6	98	-31.9	3.19	0	0	0	29.47	41.59	0	8.78	29.47	0	0	0	0	109.31
Phn-m0148-5p	AGTAATGGATGGATGACGGATG	22	5'	TRINITY_DN93177_c1_g3_i2	99	-20	2	0	0	0	5.79	0	0	0	0	0	0	0	0	5.79
Phn-m0149-5p	ATGCCAATTTGCAGAGCAAGT	21	5'	TRINITY_DN89513_c0_g1_i2	88	-29.3	3.25556	0	0	0	0	0	0	0	0	10.04	0	0	15.45	25.49
Phn-m0150-5p	ACCATACTGGGACGTGCCTCTAGG	24	5'	TRINITY_DN48438_c0_g1_i1	90	-22.6	1.61429	0	0	0	5.79	0	0	0	0	0	0	0	0	5.79
Phn-m0151-5p	TTCCCGTAAGATCTATGGAGCTCT	24	5'	TRINITY_DN89216_c3_g1_i3	93	-20.4	1.85455	18.74	32.75	19.63	0	0	0	8.78	0	10.04	19.04	15.43	15.45	139.86
Phn-m0152-5p	CTGAATCCCGGTCTGAGGCATC	22	5'	TRINITY_DN76213_c0_g1_i1	96	-29.3	2.25385	0	0	0	0	0	0	0	10.91	0	0	0	0	10.91
Phn-m0153-3p	AGAGATAATTGATCGAGGAACATC	24	3'	TRINITY_DN86139_c0_g6_i1	101	-30	3.33333	0	0	22.24	0	0	25.22	0	0	17.21	0	0	23.64	88.31
Phn-m0154-3p	AATTTCAGTCCAAAATAACAGGGC	24	3'	TRINITY_DN88179_c3_g1_i3	81	-27.3	3.03333	0	0	17.01	0	0	0	10.98	0	19.36	0	8.57	11.82	67.74
Phn-m0155-5p	TTGGAAACAATCTCTTTGTGATAT	24	5'	TRINITY_DN89395_c0_g2_i1	93	-24.5	3.5	0	0	0	5.26	0	0	0	0	9.32	0	0	0	14.58
Phn-m0156-5p	TTAAATTACATGTTTGGCAAATA	23	5'	TRINITY_DN93038_c4_g1_i1	67	-21.2	4.24	0	0	0	0	0	0	6.59	0	0	0	0	0	6.59
Phn-m0157-3p	AGGAGACGGTCTCGAATGAGAACT	24	3'	TRINITY_DN84612_c0_g2_i2	81	-18	1.5	0	0	0	0	0	0	6.04	0	0	0	0	0	6.04
Phn-m0158-5p	ATCTCTTTATGAGAGCACTCGTGA	24	5'	TRINITY_DN88278_c6_g1_i3	77	-18.9	1.89	37.49	0	14.39	10.53	14.85	0	17.02	10.91	13.62	0	11.14	21.82	151.77
Phn-m0159-3p	TCGGGGATTGCCTTGCTATAAC	22	3'	TRINITY_DN92273_c1_g4_i7	72	-19.6	1.78182	0	0	0	0	0	0	0	0	0	0	0	23.64	23.64
Phn-m0160-3p	TCGGGGATTGCCTTGCTATAAC	22	3'	TRINITY_DN92273_c1_g4_i7	72	-19.6	1.78182	0	0	0	0	0	0	0	0	0	23.8	0	0	23.8
Phn-m0161-5p	CTTGTTGGGGATCGCCTTGATCAC	24	5'	TRINITY_DN93102_c4_g2_i4	77	-22.2	1.70769	0	0	0	0	0	0	5.49	0	0	0	0	0	5.49
Phn-m0162-5p	AAATGAGATTGTACCACCGGGTGG	24	5'	TRINITY_DN88264_c1_g1_i3	73	-23	1.91667	33.74	15.66	17.01	22.1	24.75	0	12.08	0	0	0	0	0	125.34
Phn-m0163-3p	AAGGTCTAACTTCGTTACATAAGC	24	3'	TRINITY_DN86037_c1_g17_i1	94	-34.3	3.81111	0	0	0	0	0	19.29	0	0	0	0	0	0	19.29
Phn-m0164-5p	CTTTATATATATCAAGGGGTTACT	24	5'	TRINITY_DN92019_c0_g2_i7	94	-26.8	3.82857	0	0	0	0	0	0	0	0	0	0	0	10	10
Phn-m0165-3p	GGATACGCTTTTATGAGGAAAA	22	3'	TRINITY_DN87732_c2_g3_i1	85	-20	2.5	0	0	0	0	0	0	0	0	7.17	0	0	0	7.17
Phn-m0166-3p	AGGGATGAGACACAAAATGGAACC	24	3'	TRINITY_DN88751_c3_g1_i2	98	-21.3	1.93636	0	0	0	11.58	0	0	0	0	0	0	0	0	11.58
Phn-m0167-3p	ATTTTACGGTTCGGTTAACCGAAC	24	3'	TRINITY_DN90692_c2_g6_i3	77	-20.2	2.02	0	0	0	0	0	0	7.69	0	0	0	0	0	7.69
Phn-m0167-5p	AAAAACCGAACCGAAATAACCGTT	24	5'	TRINITY_DN90692_c2_g6_i3	77	-20.2	2.24444	37.49	15.66	27.48	0	0	0	0	0	0	13.09	15.43	11.82	120.97
Phn-m0168-5p	GTAAAACTCGAAATACTATAATGT	24	5'	TRINITY_DN86990_c0_g2_i1	97	-23.3	3.88333	0	0	0	0	0	0	0	0	8.6	0	0	0	8.6
Phn-m0169-5p	TGGGCCACGGACTGTTGAGGCC	22	5'	TRINITY_DN92363_c0_g2_i8	80	-27.2	1.81333	0	0	0	5.26	0	0	0	0	0	0	0	0	5.26
Phn-m0170-3p	AAGGGAGGTTCCATCCTAAAACC	23	3'	TRINITY_DN85517_c1_g3_i1	75	-22.7	2.06364	0	0	0	6.84	20.79	0	0	12	9.32	0	0	0	48.95
Phn-m0171-3p	AGAGAATTTGGTTTTGAAGAAGTC	24	3'	TRINITY_DN143228_c0_g1	88	-20.1	2.5125	0	0	0	5.79	0	0	7.14	0	0	0	0	0	12.93
Phn-m0172-3p	AATGAGAGGTAAACAAATGAATG	23	3'	TRINITY_DN89922_c0_g1_i9	81	-21	3	0	0	0	8.42	0	0	0	0	0	0	11.14	0	19.56
Phn-m0173-5p	TCGAACTCCTGACCACTTGGTTA	23	5'	TRINITY_DN93022_c4_g3_i7	94	-22.3	2.02727	0	0	0	16.84	28.71	17.8	24.16	29.47	22.23	11.9	9.43	0	160.54
Phn-m0174-5p	GTAAACTGAATACTGAGTATTG	22	5'	TRINITY_DN92042_c1_g1_i8	95	-31.4	4.48571	0	0	0	6.84	0	0	0	0	0	0	0	0	6.84
Phn-m0175-3p	ATGGGTGAGAATGAAATAGAGCGA	24	3'	TRINITY_DN68492_c0_g1_i1	95	-25	2.5	0	0	0	5.79	0	0	0	0	7.89	0	9.43	0	23.11
Phn-m0176-5p	AGGAGTTTGTGATTGTGAGTTCTT	24	5'	TRINITY_DN87230_c3_g6_i2	77	-19.1	2.12222	0	17.08	0	45.26	46.54	47.47	17.02	0	0	0	9.43	0	182.8
Phn-m0177-5p	AGGAGTTTGTGATTGTGAGTTCTT	24	5'	TRINITY_DN87230_c3_g6_i2	77	-19.1	2.12222	0	0	18.32	0	0	0	0	25.1	31.55	15.47	0	17.27	107.71
Phn-m0178-3p	CGGTCGGGCGATTCGATTCGCC	22	3'	TRINITY_DN92424_c6_g1_i2	98	-43.9	2.92667	0	0	0	5.79	0	0	14.27	20.74	0	0	0	0	40.8
Phn-m0179-5p	TGATTCCAGAGTCGTGGTGATTC	23	5'	TRINITY_DN85629_c3_g2_i1	79	-35.9	3.26364	0	0	0	0	0	0	5.49	0	0	0	0	0	5.49
Phn-m0180-3p	AATTGTCAATTAGAGGAGTAGCCT	24	3'	TRINITY_DN89233_c0_g5_i3	101	-18.7	2.07778	0	0	0	11.58	0	0	0	0	0	0	0	0	11.58
Phn-m0181-3p	AATTGTCAATTAGAGGAGTAGCCT	24	3'	TRINITY_DN89233_c0_g5_i3	101	-18.7	2.07778	0	0	0	0	0	0	9.33	0	0	0	0	0	9.33
Phn-m0182-5p	AGGTTATATAACGTTGATTGAGCC	24	5'	TRINITY_DN90830_c1_g6_i3	80	-36.7	4.07778	0	0	13.08	0	9.9	0	0	0	7.17	0	0	0	30.15
Phn-m0183-5p	TTTAATGGCAGGTAGAGCAGC	21	5'	TRINITY_DN91103_c3_g1_i8	78	-24.8	2.48	0	0	0	0	0	0	0	10.91	0	0	0	0	10.91
Phn-m0184-3p	GGTTTAAACCGTATCGTATTCGTT	24	3'	TRINITY_DN88892_c3_g1_i7	97	-37.1	4.12222	0	0	0	0	0	0	0	0	0	11.9	14.57	13.64	40.11
Phn-m0185-3p	ATGAGACAAAAACCATGAATTG	22	3'	TRINITY_DN92183_c2_g2_i2	96	-29.1	4.15714	0	0	39.25	5.26	13.86	0	0	0	0	15.47	0	10.91	84.75
Phn-m0186-3p	TCTTGAGTCGATCGACTGGG	20	3'	TRINITY_DN93213_c1_g1_i8	81	-34.1	3.1	0	0	13.08	0	0	0	5.49	0	0	0	11.14	0	29.71
Phn-m0187-3p	GAGATTCGAGTCGATCGACTGG	22	3'	TRINITY_DN93213_c1_g1_i8	82	-28.7	2.39167	0	0	19.63	0	0	0	0	0	0	13.09	0	25.45	58.17
Phn-m0188-5p	ACTTGATAAATATAAGGGGGATT	23	5'	TRINITY_DN85770_c0_g1_i2	98	-24.5	3.5	0	0	0	6.32	0	0	0	0	0	0	0	0	6.32
Phn-m0189-5p	TTTTGCATAGGCCATCAAGTA	21	5'	TRINITY_DN87205_c1_g1_i1	88	-30.2	3.775	24.37	14.24	0	104.21	177.24	0	0	321.94	297.53	209.44	0	0	1148.97
Phn-m0190-5p	TTTTGCATAGGCCATCAAGTA	21	5'	TRINITY_DN87205_c1_g1_i1	88	-30.2	3.775	671.04	560.94	477.58	0	9.9	167.63	313.49	0	11.47	0	216.88	233.63	2662.56
Phn-m0191-3p	ACGATCAGCTAATTTCTTAGC	21	3'	TRINITY_DN84691_c0_g2_i1	81	-20.9	2.6125	0	0	0	7.37	0	0	0	12	0	0	10.29	0	29.66
Phn-m0192-3p	AACCTGGACCTGTAGGAATAGT	22	3'	TRINITY_DN93193_c1_g1_i9	99	-24.3	2.43	0	0	0	0	0	0	0	0	0	0	9.43	0	9.43
Phn-m0193-5p	GATTTTCTTTTGCGAATTCCGGGA	24	5'	TRINITY_DN90164_c2_g1_i6	86	-21.8	2.18	0	0	0	0	0	0	0	0	0	0	0	11.82	11.82
Phn-m0194-5p	GAAAGGGAATGGGAAAATAAGCC	23	5'	TRINITY_DN89537_c2_g2_i7	97	-35	3.5	0	0	0	0	0	0	0	0	0	0	11.14	0	11.14
Phn-m0195-5p	GAAAGGGAATGGGAAAATAAGCC	23	5'	TRINITY_DN89537_c2_g2_i7	97	-35	3.5	0	0	0	0	0	0	0	0	0	0	0	10.91	10.91
Phn-m0196-3p	AGGGTGTGTTTGGATAGACAAATT	24	3'	TRINITY_DN92397_c1_g3_i1	98	-21.3	2.36667	0	0	0	11.58	14.85	28.19	0	0	0	0	0	0	54.62
Phn-m0197-3p	ACGCTTTGAGGCACTCTCGATCTC	24	3'	TRINITY_DN85742_c4_g1_i2	81	-22	1.69231	0	0	0	5.79	0	0	0	0	0	0	0	0	5.79
Phn-m0198-3p	CTAATTCTGAAAACCGCACCCGT	23	3'	TRINITY_DN88041_c4_g2_i1	100	-47	4.27273	0	0	0	0	0	0	15.37	0	7.89	16.66	12.86	28.18	80.96
Phn-m0199-5p	GGAAATACTCATGATCAACACCA	23	5'	TRINITY_DN90415_c4_g2_i1	87	-22.4	2.48889	46.86	35.59	20.94	27.37	33.66	25.22	13.18	16.37	14.34	44.03	30	28.18	335.74
Phn-m0200-5p	TATTGTGACCATCATTTAATCTT	23	5'	TRINITY_DN90124_c0_g2_i5	97	-49.5	8.25	0	0	0	0	0	0	0	0	0	0	19.72	0	19.72
Phn-m0201-5p	TATTGTGACCATCATTTAATCTT	23	5'	TRINITY_DN90124_c0_g2_i5	97	-45.8	7.63333	0	29.9	22.24	0	0	0	6.04	0	9.32	13.09	0	10.91	91.5
Phn-m0202-5p	ATTTCTCCACCATAGTAGAAATGG	24	5'	TRINITY_DN85840_c4_g1_i3	91	-21.9	2.43333	44.99	18.51	23.55	0	0	0	0	0	11.47	0	0	0	98.52
Phn-m0203-3p	CACGAAGAGCAGATCTCATAGC	22	3'	TRINITY_DN92463_c4_g1_i8	82	-22.8	2.07273	0	18.51	0	0	0	0	0	0	0	15.47	0	0	33.98
Phn-m0204-3p	ATTGCATGAATCCGGAATAAACCC	24	3'	TRINITY_DN92306_c2_g2_i1	76	-18.7	1.87	0	0	0	5.26	0	0	0	0	0	0	10.29	0	15.55
Phn-m0205-3p	AGTTGGGTCAGTGTACGTCATA	22	3'	TRINITY_DN123704_c0_g1	76	-21.5	2.15	0	17.08	0	0	0	0	0	0	0	0	0	0	17.08
Phn-m0206-5p	TTGATATGTCCATTTTAAGTAG	22	5'	TRINITY_DN90401_c2_g1_i4	99	-22.5	3.75	0	49.83	0	18.42	0	0	6.59	0	0	11.9	10.29	0	97.03
Phn-m0207-3p	CAGAGTTCCGCCCGGTCGGGCG	22	3'	TRINITY_DN93286_c5_g1_i1	75	-39.3	2.31176	0	0	0	0	0	0	0	0	0	0	0	11.82	11.82
Phn-m0208-3p	ATCTACAGAGCCCCCAGTTTGAC	23	3'	TRINITY_DN89254_c1_g1_i4	79	-25.7	2.14167	0	0	0	0	0	0	6.59	0	0	0	0	0	6.59
Phn-m0208-5p	ATCATTGGGCTTGTTTTGGGGGGT	24	5'	TRINITY_DN89254_c1_g1_i4	79	-25.7	2.14167	0	0	0	0	0	0	9.88	0	7.17	0	0	0	17.05
Phn-m0209-5p	GAAATTATGACAAATCTTTGAATT	24	5'	TRINITY_DN89909_c1_g2_i2	90	-18.6	3.72	31.86	0	19.63	5.26	11.88	0	9.88	13.1	7.89	35.7	22.29	16.36	173.85
Phn-m0210-5p	AGAGACTCCAAGTTCAGAATATGT	24	5'	TRINITY_DN92374_c1_g2_i10	101	-21.6	2.4	29.99	0	14.39	0	11.88	0	0	0	0	0	11.14	0	67.4
Phn-m0211-5p	AGAGACTCCAAGTTCAGAATATGT	24	5'	TRINITY_DN91794_c2_g4_i2	101	-21.6	2.4	0	0	0	0	0	0	13.18	0	7.17	0	0	10.91	31.26
Phn-m0212-5p	AGAGACTCCAAGTTCAGAATATGT	24	5'	TRINITY_DN92374_c1_g2_i8	101	-21.6	2.4	0	17.08	0	0	0	17.8	0	0	0	0	0	0	34.88
Phn-m0213-5p	AGAGACTCCAAGTTCAGAATATGT	24	5'	TRINITY_DN91794_c2_g4_i2	101	-21.6	2.4	0	0	20.94	5.26	0	0	0	0	0	0	0	0	26.2
Phn-m0214-5p	ATGCCAATTTGCAGAGCAAGT	21	5'	TRINITY_DN90991_c3_g5_i1	69	-23.8	2.64444	0	0	0	0	0	0	10.43	10.91	0	19.04	8.57	0	48.95
Phn-m0215-5p	CGTGATGCACCTTCTGATATCA	22	5'	TRINITY_DN93141_c3_g3_i7	77	-34.1	3.41	0	0	0	5.26	0	0	0	0	0	0	0	0	5.26
Phn-m0216-5p	GTTGTATGTATATAACGGGGTTTT	24	5'	TRINITY_DN87548_c6_g2_i2	97	-37	4.625	0	0	0	5.26	0	0	0	0	0	0	0	0	5.26
Phn-m0217-3p	TAGGATGTTGACTTTGGCTATC	22	3'	TRINITY_DN92582_c4_g4_i1	73	-19.6	2.17778	0	0	0	0	0	0	0	13.1	0	11.9	0	10.91	35.91
Phn-m0218-3p	TAGGATGTTGACTTTGGCTATC	22	3'	TRINITY_DN92582_c4_g4_i1	73	-19.6	2.17778	0	0	0	0	0	0	0	0	8.6	0	0	0	8.6
Phn-m0219-3p	TAGGATGTTGACTTTGGCTATC	22	3'	TRINITY_DN92582_c4_g4_i1	73	-19.6	2.17778	0	0	20.94	0	0	0	7.14	0	0	0	11.14	0	39.22
Phn-m0220-5p	AAGGCACTGGGATAATGTTGTTGT	24	5'	TRINITY_DN86239_c0_g1_i5	81	-18.9	1.89	93.72	111.05	78.51	98.42	136.64	115.71	47.77	42.56	46.6	26.18	14.57	47.27	859
Phn-m0221-5p	TCAGACCTGCTGAGATTGACA	21	5'	TRINITY_DN89058_c0_g3_i3	68	-18.5	1.85	22.49	0	0	0	0	0	0	0	0	0	0	0	22.49
Phn-m0222-3p	GGCCTGAATTGCAATTTAGTT	21	3'	TRINITY_DN92852_c0_g5_i1	78	-46.3	5.7875	0	0	0	0	0	0	0	62.21	10.04	0	36.86	0	109.11
Phn-m0222-5p	CTAAATTGCAATTCATGCCTT	21	5'	TRINITY_DN92852_c0_g5_i1	78	-46.3	6.61429	0	0	0	67.89	93.07	0	0	175.7	0	0	0	0	336.66
Phn-m0223-5p	CCAAATTGCAATTCATGCCTT	21	5'	TRINITY_DN92852_c0_g1_i8	76	-42.4	5.3	0	0	0	0	0	241.81	0	0	195.73	0	0	0	437.54
Phn-m0224-3p	GGCCTGAATTGCAATTTAGTT	21	3'	TRINITY_DN89966_c1_g3_i12	78	-46.3	5.7875	39.36	42.71	14.39	34.21	0	59.34	0	15.28	21.51	54.74	33.43	34.55	349.52
Phn-m0224-5p	CTAAATTGCAATTCATGCCTT	21	5'	TRINITY_DN89966_c1_g3_i12	78	-46.3	6.61429	153.7	162.3	0	0	0	0	17.02	0	60.94	0	120.87	0	514.83
Phn-m0225-3p	GGCCTGAATTGCAATTTAGTT	21	3'	TRINITY_DN92852_c0_g1_i4	78	-46.3	5.7875	58.11	29.9	15.7	6.84	77.23	16.32	56.55	0	10.75	0	0	0	271.4
Phn-m0225-5p	CTAAATTGCAATTCATGCCTT	21	5'	TRINITY_DN92852_c0_g1_i4	78	-46.3	6.61429	0	0	82.43	0	0	23.74	139.45	0	0	134.47	0	80.91	461
Phn-m0226-3p	ATAGGTCTGAATTGCAATTTGGCT	24	3'	TRINITY_DN92852_c0_g1_i5	78	-42.4	4.71111	0	0	0	0	0	0	0	12	0	0	0	0	12
Phn-m0226-5p	CCAAATTGCAATTCATGCCTT	21	5'	TRINITY_DN92852_c0_g1_i5	78	-42.4	5.3	0	0	117.76	13.16	13.86	0	9.88	0	0	0	0	172.73	327.39
Phn-m0227-3p	AGAATTGACGTGGATCTTTTAGCA	24	3'	TRINITY_DN91198_c2_g4_i2	90	-22.9	2.54444	0	0	0	5.79	12.87	0	0	0	0	0	0	0	18.66
Phn-m0228-3p	CGGGATCTGTTGTTGTGACGACT	23	3'	TRINITY_DN93092_c2_g1_i10	89	-18.5	1.54167	0	0	19.63	8.42	0	0	11.53	0	10.04	0	12.86	9.09	71.57
Phn-m0229-3p	TGGCCTGTGGCTGTTTTGGGAG	22	3'	TRINITY_DN93227_c3_g2_i11	72	-27.6	2.12308	0	0	0	0	0	0	0	0	0	0	11.14	0	11.14
Phn-m0229-5p	TCGCAGCCATATACCAGAGAG	21	5'	TRINITY_DN93227_c3_g2_i11	72	-27.6	2.50909	0	15.66	0	0	0	0	0	0	0	13.09	0	0	28.75
Phn-m0230-5p	GAGAAGTCCTCTGATCAGCATC	22	5'	TRINITY_DN93227_c3_g2_i6	97	-28.7	2.60909	0	0	0	0	0	0	0	0	0	13.09	0	0	13.09
Phn-m0231-5p	GAGAAGTCCTCTGATCAGCATC	22	5'	TRINITY_DN93227_c3_g2_i6	97	-28.7	2.60909	0	0	0	0	0	0	7.69	0	0	0	0	0	7.69
Phn-m0232-3p	TTGTTCAAGATTGGGGTGGTCT	22	3'	TRINITY_DN86897_c8_g1_i4	94	-27.2	2.72	28.12	25.63	0	0	0	0	7.14	0	0	15.47	19.72	0	96.08
Phn-m0233-5p	TTCAATGAACAAGAGAGAGACT	22	5'	TRINITY_DN90792_c0_g1_i2	92	-20	2.5	20.62	0	0	0	0	0	0	0	0	14.28	16.29	0	51.19
Phn-m0234-3p	ACTGAATTTCAACGTTATCCCTTT	24	3'	TRINITY_DN90778_c0_g4_i2	101	-20.8	2.6	0	0	0	6.32	0	0	5.49	0	0	0	0	0	11.81
Phn-m0235-3p	ACTGAATTTCAACGTTATCCCTTT	24	3'	TRINITY_DN90778_c0_g4_i2	101	-20.8	2.6	0	0	0	0	0	0	7.14	0	0	0	0	0	7.14
Phn-m0236-3p	GTGCTGACATAGCTTCAATGCTA	23	3'	TRINITY_DN92461_c3_g1_i8	86	-25.3	2.53	0	0	0	0	0	0	0	13.1	12.19	0	0	0	25.29
Phn-m0236-5p	GTGTCTGTGTCGGACACGAGTACT	24	5'	TRINITY_DN92461_c3_g1_i8	86	-25.3	1.94615	0	0	0	0	0	0	0	0	10.75	0	0	0	10.75
Phn-m0237-3p	TTCTCCCTTGGATCTTGGTTGA	22	3'	TRINITY_DN92185_c1_g1_i2	87	-18.8	1.88	0	0	0	0	0	0	0	0	0	0	0	10.91	10.91
Phn-m0238-3p	GATGTTACTTGACACGATAGAC	22	3'	TRINITY_DN87666_c3_g7_i1	91	-23.5	2.61111	73.1	44.13	39.25	0	0	0	0	0	0	123.76	117.44	86.36	484.04
Phn-m0239-3p	TGCGAGTTTGTACCTAGGTACT	22	3'	TRINITY_DN90507_c3_g6_i1	96	-33.2	3.32	0	0	0	0	0	0	0	0	0	13.09	0	0	13.09
Phn-m0240-3p	TGACAGTGACTCCATCTGGTCC	22	3'	TRINITY_DN82670_c0_g1_i1	74	-22.1	1.84167	0	0	0	0	0	0	0	0	7.17	0	0	0	7.17
Phn-m0241-3p	TTGGGCTAGACAGGGGCATCCC	22	3'	TRINITY_DN82670_c0_g1_i1	92	-24.9	1.77857	0	0	0	0	0	0	0	0	0	0	10.29	0	10.29
Phn-m0242-5p	CTGTTCCACCAGGTTTTTCTGG	22	5'	TRINITY_DN82670_c0_g1_i1	79	-23.7	2.15455	0	0	0	0	0	0	0	0	7.89	0	0	0	7.89
Phn-m0243-5p	ATCCATGCAAAGAACTCCACAGTT	24	5'	TRINITY_DN89555_c4_g1_i17	79	-34.2	3.42	0	0	0	18.42	29.7	23.74	12.08	0	14.34	14.28	13.72	26.36	152.64
Phn-m0244-5p	CTGAGATTTCTATTGTTTGCACAT	24	5'	TRINITY_DN92523_c1_g2_i1	97	-30.5	3.8125	0	0	0	0	0	0	0	0	0	0	10.29	12.73	23.02
Phn-m0245-5p	AGGCCGATGTCAAGTCTTGATG	22	5'	TRINITY_DN90206_c4_g1_i2	85	-18.3	1.66364	0	0	0	0	0	0	9.33	0	0	0	0	0	9.33
Phn-m0246-5p	TTAGCCAAGTATCACGAGATCT	22	5'	TRINITY_DN117285_c0_g1	69	-25.6	2.84444	39.36	19.93	0	0	0	0	0	0	0	0	9.43	0	68.72
Phn-m0247-5p	AGTGAGAATTTTTTGATACCAAGA	24	5'	TRINITY_DN92795_c2_g1_i11	93	-21	3	0	0	0	0	0	0	0	0	0	0	9.43	0	9.43
Phn-m0248-3p	TCGGGGGGGTGGGTGCAGGG	20	3'	TRINITY_DN89693_c3_g1_i4	83	-36.1	2.25625	0	0	0	11.58	0	0	0	0	0	0	0	0	11.58
Phn-m0249-3p	ACGGATACCGGGACATATGATCCA	24	3'	TRINITY_DN91563_c4_g1_i1	78	-23.6	1.96667	0	0	0	0	0	0	0	0	0	15.47	0	14.55	30.02
Phn-m0250-5p	GAGAATTTGCGCAAATTTAGACT	23	5'	TRINITY_DN91013_c3_g2_i6	88	-18.6	2.325	0	0	0	0	0	0	0	12	0	0	0	13.64	25.64
Phn-m0251-5p	ATTTACCGACACCGTCCCGAGACC	24	5'	TRINITY_DN89935_c1_g3_i1	85	-18.3	1.30714	22.49	0	0	0	0	0	0	0	0	0	0	0	22.49
Phn-m0252-3p	TTGAGAATGATTCTGATCTAGTT	23	3'	TRINITY_DN87432_c2_g3_i1	75	-21.5	3.07143	0	0	0	15.79	13.86	0	5.49	0	7.89	0	0	0	43.03
Phn-m0253-3p	AAACTCAACTCAGGGCAGTCT	21	3'	TRINITY_DN88547_c1_g1_i12	91	-48.9	4.89	0	0	0	0	0	0	0	0	0	11.9	0	0	11.9
Phn-m0254-3p	TGGGAATATAAGTTGGATCAATAC	24	3'	TRINITY_DN107540_c0_g1	101	-18	2.25	0	0	0	5.26	0	0	0	0	0	0	0	0	5.26
Phn-m0255-5p	TTGGGGATATTCAAGAAAAGGAAT	24	5'	TRINITY_DN90116_c2_g3_i11	93	-24.5	3.0625	0	0	0	0	0	0	0	0	0	0	10.29	0	10.29
Phn-m0256-5p	GGATATCCAAAGTGTTTGAAACT	23	5'	TRINITY_DN85640_c0_g2_i1	93	-26.5	3.3125	71.23	44.13	64.11	17.89	26.73	35.6	20.31	10.91	25.81	69.02	59.15	45.45	490.34
Phn-m0257-5p	GTAAATCAACGAACAAATCCT	21	5'	TRINITY_DN91836_c0_g8_i1	64	-19.9	2.84286	0	0	0	0	0	0	0	0	11.47	0	0	0	11.47
Phn-m0258-3p	AGAGATGGAGAATACGGAGTCATT	24	3'	TRINITY_DN93287_c7_g4_i4	97	-25.5	2.55	0	0	19.63	0	0	29.67	0	0	22.94	0	0	23.64	95.88
Phn-m0259-5p	AAAACTATTTCGGCACGACCGTA	23	5'	TRINITY_DN87940_c0_g1_i1	81	-25.5	2.55	164.95	118.17	124.3	0	93.07	59.34	6.59	79.67	0	135.66	0	0	781.75
Phn-m0260-5p	AAGGACCAAGCCTTAACCAAGC	22	5'	TRINITY_DN91921_c1_g1_i2	83	-18.8	1.70909	0	0	0	0	11.88	0	0	0	0	0	0	0	11.88
Phn-m0261-5p	TGGAATTTAGGGTCGATCGACT	22	5'	TRINITY_DN90970_c0_g1_i6	98	-45.3	4.53	0	0	0	0	0	0	7.69	0	0	13.09	0	9.09	29.87
Phn-m0262-3p	TGAGACAATCGAGTCGATCGAC	22	3'	TRINITY_DN90970_c0_g1_i6	73	-36.3	3.3	0	0	0	6.32	0	0	0	15.28	0	19.04	0	34.55	75.19
Phn-m0263-5p	TCAGGGTTCGAGTCGATCGACT	22	5'	TRINITY_DN90970_c0_g1_i6	75	-46.4	3.86667	0	0	23.55	0	0	0	0	14.19	0	13.09	0	0	50.83
Phn-m0264-3p	TGAGACAATCGAGTCGATCGAC	22	3'	TRINITY_DN90970_c0_g1_i6	73	-36.3	3.3	61.86	29.9	23.55	0	0	0	17.02	0	25.09	0	27.43	0	184.85
Phn-m0265-5p	TCAGGGTTCGAGTCGATCGACT	22	5'	TRINITY_DN90970_c0_g1_i6	75	-46.4	3.86667	35.61	0	0	0	0	0	14.82	0	19.36	0	0	0	69.79
Phn-m0266-5p	GTCCGGTCGATCGACTCATA	20	5'	TRINITY_DN90970_c0_g1_i2	87	-27.1	2.46364	0	0	0	0	0	0	7.14	0	0	0	0	0	7.14
Phn-m0267-5p	GGGATTCAGAGTCGATCGACTG	22	5'	TRINITY_DN90970_c0_g1_i2	95	-49.7	4.14167	0	0	0	0	0	0	16.47	0	0	0	0	0	16.47
Phn-m0268-5p	GTGCCAGTCGATCGACTCGAT	21	5'	TRINITY_DN90970_c0_g1_i2	64	-26.7	2.225	0	0	0	0	0	0	6.04	0	0	0	0	0	6.04
Phn-m0269-3p	TCGATCGACCGGACTTTGAGTC	22	3'	TRINITY_DN90970_c0_g1_i6	99	-46.6	3.88333	0	0	0	0	0	0	10.43	0	0	0	0	0	10.43
Phn-m0270-3p	AAAATTCCAGTCGATCGACTC	21	3'	TRINITY_DN90970_c0_g1_i6	78	-32	3.55556	0	0	0	0	0	0	9.33	0	0	0	0	0	9.33
Phn-m0271-5p	GGAATTTGAGTCGATCGACT	20	5'	TRINITY_DN90970_c0_g1_i6	72	-38.3	4.25556	0	0	0	0	0	0	0	0	0	13.09	0	0	13.09
Phn-m0272-3p	TATGGGAAAAGCTTGTGCCACT	22	3'	TRINITY_DN93290_c5_g2_i5	76	-20.4	2.04	0	0	0	0	0	0	0	0	0	0	0	10	10
Phn-m0273-3p	CCAGGTTGTTGGTTCTCTGGGC	22	3'	TRINITY_DN93227_c3_g2_i6	72	-26.5	2.03846	0	0	0	0	0	0	0	0	0	0	10.29	0	10.29
Phn-m0274-3p	TACTGGGAATCGATGATGCATC	22	3'	TRINITY_DN90695_c2_g1_i2	97	-20.7	2.07	29.99	0	17.01	0	0	0	5.49	0	17.21	13.09	19.72	43.64	146.15
Phn-m0274-5p	TTATGTCACCAGATTCTTTAAA	22	5'	TRINITY_DN90695_c2_g1_i2	97	-20.7	3.45	0	0	0	7.37	0	0	6.04	0	0	20.23	31.72	26.36	91.72
Phn-m0275-3p	ATGCCGGAGATGTTGACTCGAGAA	24	3'	TRINITY_DN93279_c3_g1_i1	98	-23	1.91667	0	0	0	0	0	0	7.14	0	0	0	0	0	7.14
Phn-m0276-3p	GGGACGAATTGAGTCATTCAGATT	24	3'	TRINITY_DN92522_c1_g2_i1	101	-26.8	2.68	0	0	0	0	0	0	7.69	0	0	0	10.29	0	17.98
Phn-m0277-3p	ATTTCCTTCACTTATCACTTGTGG	24	3'	TRINITY_DN91435_c0_g3_i6	90	-32	3.55556	29.99	15.66	0	5.26	0	0	0	16.37	7.89	14.28	0	9.09	98.54
Phn-m0278-3p	TGGACCCGATCAAATACTTGTT	22	3'	TRINITY_DN84567_c1_g2_i1	83	-20.9	2.32222	0	0	0	0	0	0	0	0	0	14.28	0	0	14.28
Phn-m0279-3p	TTGGGACACATGTTAGAAAAACC	23	3'	TRINITY_DN106501_c0_g1	100	-27.2	3.02222	0	0	0	11.58	0	0	0	0	0	11.9	11.14	10.91	45.53
Phn-m0280-5p	GAGAAGTATTATGGATAGTTAAG	23	5'	TRINITY_DN90828_c3_g1	65	-18.4	2.62857	0	0	0	6.32	0	0	0	0	0	0	0	0	6.32
Phn-m0281-5p	ATTCAGTCTAAAAGAACATGGT	22	5'	TRINITY_DN89597_c2_g2	70	-20.6	2.94286	39.36	0	0	0	15.84	0	8.78	0	22.94	0	0	0	86.92
Phn-m0282-5p	TGTCATGTAGGCTTTCTCTCCTA	23	5'	TRINITY_DN92408_c1_g5_i1	72	-19.9	1.99	0	0	0	0	11.88	0	14.27	0	7.89	0	0	0	34.04
Phn-m0283-5p	ATCAGATCGGTCAAAGCTCGGTG	23	5'	TRINITY_DN88169_c3_g1	78	-24.8	2.06667	0	0	0	0	0	0	0	0	7.89	0	0	0	7.89
Phn-m0284-3p	TAATTGAATGACTGCGTTGAGCA	23	3'	TRINITY_DN92664_c2_g3_i3	74	-34.7	3.85556	0	0	0	0	0	0	0	0	7.17	0	8.57	0	15.74
Phn-m0285-5p	AGAGAATCTGACGGAATTTCCGT	23	5'	TRINITY_DN92017_c0_g1_i1	82	-38.7	3.87	0	0	17.01	0	10.89	0	0	0	8.6	35.7	0	36.36	108.56
Phn-m0286-5p	TAGATACCCATGAGTAAAGTTT	22	5'	TRINITY_DN92896_c0_g2	99	-26.3	3.75714	33.74	17.08	32.71	0	0	0	5.49	0	0	34.51	27.43	40.91	191.87
Phn-m0287-3p	AGTTGAATTCTCGGACATGTCCGA	24	3'	TRINITY_DN73787_c0_g2_i1	91	-35.5	3.22727	0	0	0	0	0	0	0	15.28	0	0	0	0	15.28
Phn-m0288-3p	AGTTGAATTCTCGGACATGTCCGA	24	3'	TRINITY_DN73787_c0_g2_i1	91	-40.9	3.71818	0	0	0	8.95	0	0	7.69	0	0	0	0	0	16.64
Phn-m0289-3p	TTGCCCGAGGTGAATTTTGAACAA	24	3'	TRINITY_DN73787_c0_g2_i1	77	-27	2.7	0	0	0	0	0	0	0	0	0	0	0	9.09	9.09
Phn-m0290-5p	AGGAATTGTAATTCATGTGAATTA	24	5'	TRINITY_DN88147_c1_g1_i9	95	-24.5	4.08333	41.24	14.24	19.63	17.89	20.79	0	42.28	36.01	48.04	0	0	24.55	264.67
Phn-m0291-5p	AAATAAGGGTCGAATTGTTCTATC	24	5'	TRINITY_DN86321_c1_g8_i1	76	-18.4	2.3	0	0	0	5.79	9.9	0	5.49	0	7.17	0	0	0	28.35
Phn-m0292-5p	ACAGGATGTGTAAAAGCTGCC	21	5'	TRINITY_DN86697_c0_g7_i1	77	-32.3	3.23	0	0	0	15.26	12.87	41.54	15.92	17.46	15.77	0	0	0	118.82
Phn-m0293-3p	ACGAATGGAGGATGATCCGAGAAT	24	3'	TRINITY_DN93048_c1_g3_i3	86	-42.1	3.82727	0	0	0	0	0	0	0	10.91	0	0	9.43	0	20.34
Phn-m0294-3p	ACCGAACCCGGGTTGGTCCGAGAA	24	3'	TRINITY_DN87914_c2_g9_i1	82	-37.8	2.52	0	0	0	0	0	0	0	0	7.89	0	0	0	7.89
Phn-m0295-3p	ATCGATGTGTCATAAGATATGAGA	24	3'	TRINITY_DN92092_c2_g1_i2	101	-25.7	3.2125	0	0	0	6.84	15.84	0	10.98	0	0	0	0	0	33.66
Phn-m0296-3p	AATTGTGTAACCGTCTGAGACAGT	24	3'	TRINITY_DN92770_c0_g2_i1	86	-19.9	1.99	31.86	0	18.32	5.79	0	0	0	12	12.19	0	0	0	80.16
Phn-m0297-3p	AACATGACTTAAGTTCTTTTGC	22	3'	TRINITY_DN126451_c0_g1	90	-18.6	2.65714	0	0	0	6.32	0	0	0	0	0	0	0	0	6.32
Phn-m0298-5p	AGAAACTTTGTTGGCTTAACCAGC	24	5'	TRINITY_DN88284_c5_g3_i4	91	-28.9	2.89	0	0	0	0	0	0	0	0	0	0	0	11.82	11.82
Phn-m0299-5p	AGGTTAGGCTCTGTCGGGTTAGCT	24	5'	TRINITY_DN136851_c0_g1	88	-22.1	1.7	0	0	0	6.32	0	0	0	0	0	0	0	0	6.32
Phn-m0300-3p	AGGTCTGTCTCAGCCCACTTGGCC	24	3'	TRINITY_DN86890_c3_g2	101	-31.2	2.08	0	0	13.08	0	0	0	0	0	0	0	0	0	13.08
Phn-m0301-3p	CACGAGACACATAGCCAATGTG	22	3'	TRINITY_DN89307_c4_g1_i3	70	-20.7	1.88182	0	0	0	13.16	0	0	0	0	0	0	0	0	13.16
Phn-m0302-3p	GAAATGGGTATTCCTTGACTGTCC	24	3'	TRINITY_DN86967_c3_g4_i1	92	-20.5	1.86364	0	0	0	0	9.9	0	0	0	0	0	0	0	9.9
Phn-m0303-5p	CTGAAGAGATTTCTTGACACCC	22	5'	TRINITY_DN91889_c2_g6_i3	75	-18.8	1.88	0	0	0	0	0	0	0	0	0	0	0	10	10
