# Supplementary material for: Integrated Analyses of miRNAome and Transcriptome Reveal The Function of miRNAs in Morphogenesis of Organs and Defense of Endophytes in Pseudostellaria Heterophylla
Source: Research Square preprint supplement (doi:10.21203/rs.3.rs-239755/v1), 2021-03-01
Supplement: Supplementary file 17 [file 43798f6e14ac5c69b22d9071.xlsx]

## Sheet: Sheet1
Primers used to amplify cleavage products of miRNA target genes in Pseudostellaria heterophylla through 5' RLM-RACE
Gene specific reverse primers used for outer PCR
Target Gene ID	Sequence of reverse primer (5'-3')	Annotation	Conserved miRNA
DN91558_c0_g3	CAAAGTTCTGCACAGCAGGCATGC	Homeobox-leucine zipper protein REVOLUTA	miR166k
DN86257_c0_g3	TCTGAGCGTGCTGATAGAACCACGG	Ovule/fiber cell elongation protein Ghfe1	Phn-m0121-5p
Gene specific reverse primers used for inner PCR
Gene	Sequence (5'- 3')	Annotation	Conserved miRNA
DN91558_c0_g3	CCAGAAGTATACCGAAGCAACCAGAAATCAC	Homeobox-leucine zipper protein REVOLUTA	miR166k
DN86257_c0_g3	GTCATCATCACTCCTTCCGAGGAACTGTACA	Ovule/fiber cell elongation protein Ghfe1	Phn-m0121-5p
