# Supplementary material for: Integrated Analyses of miRNAome and Transcriptome Reveal The Function of miRNAs in Morphogenesis of Organs and Defense of Endophytes in Pseudostellaria Heterophylla
Source: Research Square preprint supplement (doi:10.21203/rs.3.rs-239755/v1), 2021-03-01
Supplement: Supplementary file 18 [file 534e60b5daa78cf224afbf75.xls]

## Sheet: Sheet1
miRNA	Target gene	Score	CorrC	P_value	FDR	nr
miR156a	TRINITY_DN82303_c0_g1	2.2	-0.602861	0.0379942	0.312445	gi|731344737|ref|XP_010683576.1|( PREDICTED: uncharacterized protein LOC104898227 [Beta vulgaris subsp. vulgaris])
miR156a-3p	TRINITY_DN85853_c0_g1	2.2	-0.615126	0.0332647	0.292543	gi|460374743|ref|XP_004233169.1|( PREDICTED: 50S ribosomal protein L20, chloroplastic [Solanum lycopersicum])
miR156l-5p	TRINITY_DN90116_c0_g1	2	-0.584379	0.0459981	0.344009	gi|731329270|ref|XP_010675500.1|( PREDICTED: squamosa promoter-binding-like protein 4 [Beta vulgaris subsp. vulgaris])
miR160d-5p	TRINITY_DN86715_c5_g3	1.8	-0.622606	0.0305967	0.280158	gi|731363367|ref|XP_010693396.1|( PREDICTED: auxin response factor 18-like isoform X2 [Beta vulgaris subsp. vulgaris])
miR166a-3p	TRINITY_DN91558_c0_g7	1.8	-0.877291	0.000177698	0.0133098	gi|731356182|ref|XP_010689538.1|( PREDICTED: homeobox-leucine zipper protein REVOLUTA-like [Beta vulgaris subsp. vulgaris])
miR166a-3p	TRINITY_DN91558_c0_g3	1.2	-0.838022	0.000664561	0.0300507	gi|731359700|ref|XP_010691422.1|( PREDICTED: homeobox-leucine zipper protein ATHB-15-like isoform X1 [Beta vulgaris subsp. vulgaris])
miR166a-3p	TRINITY_DN91558_c0_g5	1.2	-0.718228	0.00851388	0.139249	gi|902170490|gb|KNA07846.1|( hypothetical protein SOVF_168070 [Spinacia oleracea])
miR166e-3p	TRINITY_DN91558_c0_g7	2.8	-0.598341	0.0398519	0.319823	gi|731356182|ref|XP_010689538.1|( PREDICTED: homeobox-leucine zipper protein REVOLUTA-like [Beta vulgaris subsp. vulgaris])
miR166e-3p	TRINITY_DN91558_c0_g3	2.2	-0.593663	0.0418419	0.327806	gi|731359700|ref|XP_010691422.1|( PREDICTED: homeobox-leucine zipper protein ATHB-15-like isoform X1 [Beta vulgaris subsp. vulgaris])
miR166e-3p	TRINITY_DN91558_c0_g5	2.2	-0.590687	0.0431441	0.333053	gi|902170490|gb|KNA07846.1|( hypothetical protein SOVF_168070 [Spinacia oleracea])
miR166e-5p	TRINITY_DN87723_c11_g2	2.5	-0.580067	0.0480238	0.351026	gi|902235554|gb|KNA23970.1|( hypothetical protein SOVF_020410 [Spinacia oleracea])
miR166g-5p	TRINITY_DN86562_c1_g1	2	-0.711273	0.00949374	0.148089	gi|731316606|ref|XP_010696215.1|( PREDICTED: uncharacterized protein LOC104908761 isoform X1 [Beta vulgaris subsp. vulgaris])
miR166g-5p	TRINITY_DN88340_c3_g1	2.8	-0.704911	0.0104615	0.156489	gi|731368914|ref|XP_010696390.1|( PREDICTED: uncharacterized protein LOC104908918 [Beta vulgaris subsp. vulgaris])
miR166k	TRINITY_DN91558_c0_g7	0.5	-0.884538	0.000132734	0.0110625	gi|731356182|ref|XP_010689538.1|( PREDICTED: homeobox-leucine zipper protein REVOLUTA-like [Beta vulgaris subsp. vulgaris])
miR166k	TRINITY_DN91558_c0_g3	0.5	-0.854127	0.000405056	0.0219172	gi|731359700|ref|XP_010691422.1|( PREDICTED: homeobox-leucine zipper protein ATHB-15-like isoform X1 [Beta vulgaris subsp. vulgaris])
miR166k	TRINITY_DN91558_c0_g5	0.5	-0.755615	0.0044775	0.0955919	gi|902170490|gb|KNA07846.1|( hypothetical protein SOVF_168070 [Spinacia oleracea])
miR166k-3p	TRINITY_DN91558_c0_g3	2.2	-0.632249	0.0273889	0.264918	gi|731359700|ref|XP_010691422.1|( PREDICTED: homeobox-leucine zipper protein ATHB-15-like isoform X1 [Beta vulgaris subsp. vulgaris])
miR171c-3p	TRINITY_DN92867_c1_g1	0.5	-0.710316	0.00963492	0.149316	gi|902231904|gb|KNA22440.1|( hypothetical protein SOVF_034090 isoform B [Spinacia oleracea])
miR171e-3p	TRINITY_DN92867_c1_g1	0	-0.697483	0.0116821	0.166618	gi|902231904|gb|KNA22440.1|( hypothetical protein SOVF_034090 isoform B [Spinacia oleracea])
miR172b	TRINITY_DN90934_c1_g1	2.8	-0.641878	0.0244353	0.249134	gi|731317764|ref|XP_010669359.1|( PREDICTED: myosin-11 [Beta vulgaris subsp. vulgaris])
miR172b	TRINITY_DN86880_c1_g3	2.5	-0.595394	0.0410978	0.324633	gi|731325844|ref|XP_010673719.1|( PREDICTED: scarecrow-like protein 3 [Beta vulgaris subsp. vulgaris])
miR172c	TRINITY_DN87936_c1_g5	2.8	-0.638872	0.0253314	0.254184	gi|902231903|gb|KNA22439.1|( hypothetical protein SOVF_034090 isoform A [Spinacia oleracea])
miR172e-5p	TRINITY_DN82811_c0_g1	2.8	-0.640384	0.0248779	0.251645	gi|59895730|gb|AAX11262.1|( pectin methylesterase allergenic protein, partial [Kali turgidum])
miR1863a	TRINITY_DN89098_c1_g5	2.8	-0.735456	0.00641235	0.118236	gi|731338518|ref|XP_010680373.1|( PREDICTED: probable mannitol dehydrogenase [Beta vulgaris subsp. vulgaris])
miR1863a	TRINITY_DN87775_c1_g1	2.8	-0.674666	0.0160958	0.198991	gi|731373898|ref|XP_010666788.1|( PREDICTED: cyclin-U1-1 [Beta vulgaris subsp. vulgaris])
miR1863a	TRINITY_DN92697_c2_g4	2.8	-0.672049	0.0166707	0.202837	gi|731345313|ref|XP_010683858.1|( PREDICTED: probable serine/threonine-protein kinase kinX [Beta vulgaris subsp. vulgaris])
miR1863b	TRINITY_DN89098_c1_g5	2.5	-0.691588	0.0127238	0.174692	gi|731338518|ref|XP_010680373.1|( PREDICTED: probable mannitol dehydrogenase [Beta vulgaris subsp. vulgaris])
miR319a	TRINITY_DN90304_c1_g3	1.8	-0.646656	0.0230589	0.241793	gi|731356574|ref|XP_010689747.1|( PREDICTED: transcription factor TCP4-like [Beta vulgaris subsp. vulgaris])
miR319a-3p.2-3p	TRINITY_DN90304_c1_g3	0.5	-0.644212	0.0237559	0.24542	gi|731356574|ref|XP_010689747.1|( PREDICTED: transcription factor TCP4-like [Beta vulgaris subsp. vulgaris])
miR319a-3p.2-3p	TRINITY_DN89557_c1_g5	2.5	-0.638719	0.0253774	0.254422	gi|731326066|ref|XP_010673830.1|( PREDICTED: transcription factor GAMYB-like [Beta vulgaris subsp. vulgaris])
miR319i	TRINITY_DN90304_c1_g3	2	-0.72766	0.00730821	0.127537	gi|731356574|ref|XP_010689747.1|( PREDICTED: transcription factor TCP4-like [Beta vulgaris subsp. vulgaris])
miR319i	TRINITY_DN89557_c1_g5	2	-0.705688	0.0103395	0.155494	gi|731326066|ref|XP_010673830.1|( PREDICTED: transcription factor GAMYB-like [Beta vulgaris subsp. vulgaris])
miR398a-3p	TRINITY_DN88258_c4_g4	1.5	-0.78558	0.0024588	0.0668655	gi|731328262|ref|XP_010674951.1|( PREDICTED: superoxide dismutase [Cu-Zn] [Beta vulgaris subsp. vulgaris])
miR398a-3p	TRINITY_DN87876_c5_g2	2.5	-0.776305	0.00298791	0.0750937	gi|848851689|ref|XP_012836955.1|( PREDICTED: zinc finger protein WIP2-like [Erythranthe guttata])
miR6470	TRINITY_DN90697_c0_g1	2.5	-0.636295	0.026118	0.258314	gi|731372387|ref|XP_010666332.1|( PREDICTED: probable 1-deoxy-D-xylulose-5-phosphate synthase, chloroplastic [Beta vulgaris subsp. vulgaris])
miR6470	TRINITY_DN85852_c1_g4	2.5	-0.619581	0.0316564	0.285041	gi|568875516|ref|XP_006490840.1|( PREDICTED: uncharacterized protein LOC102629142 [Citrus sinensis])
miR6470	TRINITY_DN85611_c0_g1	2	-0.618066	0.032197	0.287898	gi|567217582|ref|XP_006412420.1|( hypothetical protein EUTSA_v10026440mg [Eutrema salsugineum])
Nov-m0024-3p	TRINITY_DN90343_c1_g6	0.5	-0.618979	0.0318706	0.286215	gi|641841563|gb|KDO60475.1|( hypothetical protein CISIN_1g004078mg [Citrus sinensis])
Nov-m0121-5p	TRINITY_DN86257_c0_g3	2.8	-0.780987	0.00271101	0.070948	gi|731354706|ref|XP_010688742.1|( PREDICTED: delta(24)-sterol reductase [Beta vulgaris subsp. vulgaris])
Nov-m0121-5p	TRINITY_DN87897_c1_g1	2.5	-0.742926	0.00563394	0.109771	gi|590706185|ref|XP_007047652.1|( Tubulin alpha-2 chain [Theobroma cacao])
Nov-m0121-5p	TRINITY_DN86257_c0_g5	2.8	-0.671719	0.0167441	0.20333	gi|731354706|ref|XP_010688742.1|( PREDICTED: delta(24)-sterol reductase [Beta vulgaris subsp. vulgaris])
Nov-m0129-5p	TRINITY_DN89287_c4_g1	1	-0.579172	0.0484524	0.352465	gi|731348680|ref|XP_010685611.1|( PREDICTED: leucine-rich repeat-containing protein 49 isoform X1 [Beta vulgaris subsp. vulgaris])
Nov-m0132-3p	TRINITY_DN90759_c4_g6	1.8	-0.707767	0.0100184	0.152716	gi|802550613|ref|XP_012093075.1|( PREDICTED: snakin-1 [Jatropha curcas])
Nov-m0132-3p	TRINITY_DN90855_c6_g6	2	-0.641505	0.0245453	0.249806	gi|731319852|ref|XP_010670495.1|( PREDICTED: protein ASPARTIC PROTEASE IN GUARD CELL 2 [Beta vulgaris subsp. vulgaris])
Nov-m0162-5p	TRINITY_DN92137_c1_g1	2.2	-0.606157	0.0366791	0.307089	gi|731325987|ref|XP_010673794.1|( PREDICTED: pentatricopeptide repeat-containing protein At3g16610-like [Beta vulgaris subsp. vulgaris])
Nov-m0173-5p	TRINITY_DN86966_c1_g1	1	-0.669491	0.0172468	0.206485	gi|731358455|ref|XP_010690759.1|( PREDICTED: B-box zinc finger protein 19-like isoform X1 [Beta vulgaris subsp. vulgaris])
Nov-m0173-5p	TRINITY_DN88470_c4_g3	1.5	-0.656716	0.0203463	0.22635	gi|902216991|gb|KNA17583.1|( hypothetical protein SOVF_078190 [Spinacia oleracea])
Nov-m0190-5p	TRINITY_DN91606_c0_g3	2.5	-0.582306	0.0469644	0.347415	gi|902126329|gb|KNA04118.1|( hypothetical protein SOVF_202610 [Spinacia oleracea])
Nov-m0220-5p	TRINITY_DN87288_c4_g2	2	-0.580291	0.0479174	0.350642	gi|870867178|gb|KMT18077.1|( hypothetical protein BVRB_2g032690 [Beta vulgaris subsp. vulgaris])
