# Supplementary material for: Integrated Analyses of miRNAome and Transcriptome Reveal The Function of miRNAs in Morphogenesis of Organs and Defense of Endophytes in Pseudostellaria Heterophylla
Source: Research Square preprint supplement (doi:10.21203/rs.3.rs-239755/v1), 2021-03-01
Supplement: Supplementary file 19 [file d00a2999f6599ad77ac0d637.xlsx]

## Sheet: upregulated miRNAs
miRNAs	target gene	score	query_start	query_end	target_start	target_end	query_seq	align	target_seq	nr
Phn-m0092-5p	TRINITY_DN86223_c4_g2	0	1	22	1159	1180	CGATCCAGTTCCGAAAACGGAC	||||||||||||||||||||||	GCTAGGTCAAGGCTTTTGCCTG	gi|902170209|gb|KNA07801.1|( hypothetical protein SOVF_168640 [Spinacia oleracea])
Phn-m0100-5p	TRINITY_DN85953_c3_g4	1.2	1	24	285	308	ACTTAATTAGAGTTGAACCTGAGC	||||||||||||::|||||:||||	TGAATTAATCTCGGCTTGGGCTCG	gi|922383196|ref|XP_013461820.1|( xyloglucan glycosyltransferase [Medicago truncatula])
Phn-m0101-5p	TRINITY_DN86022_c0_g4	0.5	1	23	156	178	TGAAACCGTTGTATGCATACAAG	|:|||||||||||||||||||||	ATTTTGGCAACATACGTATGTTC	gi|902100020|gb|KNA03498.1|( hypothetical protein SOVF_208660 [Spinacia oleracea])
	TRINITY_DN84183_c0_g2	1	1	23	31	53	TGAAACCGTTGTATGCATACAAG	|:||||||||||||||||||||*	ATTTTGGCAACATACGTATGTTG	gi|225450557|ref|XP_002277523.1|( PREDICTED: Werner Syndrome-like exonuclease [Vitis vinifera])
	TRINITY_DN89019_c4_g9	1	1	23	1661	1683	TGAAACCGTTGTATGCATACAAG	||||*||||||||||||||||||	ACTTCGGCAACATACGTATGTTC	gi|1035926870|gb|OAY56457.1|( hypothetical protein MANES_02G018200 [Manihot esculenta])
	TRINITY_DN92688_c3_g1	1	1	23	272	294	TGAAACCGTTGTATGCATACAAG	||||||||*||||||||||||||	ACTTTGGCCACATACGTATGTTC	gi|590722471|ref|XP_007051903.1|( Signal recognition particle receptor protein isoform 1 [Theobroma cacao])
	TRINITY_DN86211_c1_g2	1.5	1	23	1467	1489	TGAAACCGTTGTATGCATACAAG	|||*||||||||||||||||||*	ACTGTGGCAACATACGTATGTTA	gi|727529853|ref|XP_010439984.1|( PREDICTED: GATA transcription factor 26-like isoform X2 [Camelina sativa])
	TRINITY_DN87615_c6_g4	1.5	1	23	264	287	TGAAACCGTTGTATGCATACAA-G	|||*||||||||||||||||||*|	ACTCTGGCAACATACGTATGTTGC	gi|965663352|dbj|BAT79061.1|( hypothetical protein VIGAN_02186500 [Vigna angularis var. angularis])
	TRINITY_DN89185_c3_g3	1	1	23	383	405	TGAAACCGTTGTATGCATACAAG	|||||||:|||||:|||||||||	ACTTTGGTAACATGCGTATGTTC	gi|870850925|gb|KMT02991.1|( hypothetical protein BVRB_8g195590 isoform A [Beta vulgaris subsp. vulgaris])
	TRINITY_DN88172_c2_g2	1.5	1	23	1666	1689	TGAAACCGTTGTATGCATACAA-G	|||*||||||||||||||||||*|	ACTCTGGCAACATACGTATGTTGC	gi|1021044690|gb|KZN02471.1|( hypothetical protein DCAR_011225 [Daucus carota subsp. sativus])
	TRINITY_DN86364_c9_g3	1.8	1	23	2238	2260	TGAAACCGTTGTATGCATACAAG	|:||||||||:||||||||||*:	ATTTTGGCAATATACGTATGTGT	gi|731353929|ref|XP_010688314.1|( PREDICTED: probable 2-oxoglutarate-dependent dioxygenase At3g49630 isoform X1 [Beta vulgaris subsp. vulgaris])
	TRINITY_DN88854_c2_g1	1.8	1	23	1825	1848	TGAAACCGTTGTATGCATACAA-G	|||||||:|||||||||:|*||*|	ACTTTGGTAACATACGTGTATTGC	gi|731337405|ref|XP_010679769.1|( PREDICTED: lipid phosphate phosphatase epsilon 1, chloroplastic isoform X2 [Beta vulgaris subsp. vulgaris])
	TRINITY_DN87426_c2_g1	1.5	1	23	819	842	TGAAACCGTTGTATGCATACAA-G	|||*||||||||||||||||||*|	ACTGTGGCAACATACGTATGTTGC	gi|731344262|ref|XP_010683317.1|( PREDICTED: uncharacterized protein LOC104898021 [Beta vulgaris subsp. vulgaris])
	TRINITY_DN87615_c6_g1	1.5	1	23	1233	1256	TGAAACCGTTGTATGCATACAA-G	|||*||||||||||||||||||*|	ACTCTGGCAACATACGTATGTTGC	gi|902168321|gb|KNA07491.1|( hypothetical protein SOVF_171290, partial [Spinacia oleracea])
	TRINITY_DN91761_c1_g4	1.8	1	23	3202	3223	TGAAACCGTTGTATGCATACAAG	|||*|||||||||||||||*||:	ACTCTGGCAACATACGTAT-TTT	gi|731358013|ref|XP_010690514.1|( PREDICTED: uncharacterized protein LOC104904039 [Beta vulgaris subsp. vulgaris])
	TRINITY_DN93077_c0_g1	1.8	1	23	2184	2206	TGAAACCGTTGTATGCATACAAG	||||*|||||:|||||||||||:	ACTTGGGCAATATACGTATGTTT	gi|576303651|ref|YP_008999969.1|( ribosomal protein S8 (chloroplast) (chloroplast) [Agrostemma githago])
	TRINITY_DN89185_c3_g2	1.5	1	23	1150	1173	TGAAACCGTTGTATGCATACAA-G	|||||||:|||||:||||||||*|	ACTTTGGTAACATGCGTATGTTAC	gi|902195834|gb|KNA12966.1|( hypothetical protein SOVF_120870 [Spinacia oleracea])
	TRINITY_DN93261_c2_g4	1.8	1	23	1303	1325	TGAAACCGTTGTATGCATACAAG	|||*|||||||||||||:||||*	ACTCTGGCAACATACGTGTGTTA	gi|902206620|gb|KNA15515.1|( hypothetical protein SOVF_097610 isoform B [Spinacia oleracea])
	TRINITY_DN86211_c1_g4	2	1	23	101	123	TGAAACCGTTGTATGCATACAAG	*||*||||||||||||||||||*	TCTGTGGCAACATACGTATGTTA	gi|987437860|ref|NP_001306941.1|( glucan endo-1,3-beta-glucosidase-like precursor [Beta vulgaris subsp. vulgaris])
	TRINITY_DN86646_c2_g6	2	1	23	1207	1230	TGAAACCGTTGTATGCATACAA-G	|:||||||||::||||||||||*|	ATTTTGGCAATGTACGTATGTTGC	gi|731354246|ref|XP_010688479.1|( PREDICTED: AP2-like ethylene-responsive transcription factor AIL5 [Beta vulgaris subsp. vulgaris])
	TRINITY_DN88342_c2_g1	2	1	23	68	91	TGAAACCGTTGTATGCATACAA-G	|:||||||||||*|||||||||*|	ATTTTGGCAACACACGTATGTTGC	gi|902238874|gb|KNA25360.1|( hypothetical protein SOVF_007270 [Spinacia oleracea])
	TRINITY_DN87315_c0_g1	1.8	1	23	261	282	TGAAACCGTTGTATGCATACAAG	||||*||||||||||||||*||:	ACTTAGGCAACATACGTAT-TTT	gi|902198673|gb|KNA13750.1|( hypothetical protein SOVF_113640 [Spinacia oleracea])
	TRINITY_DN88466_c4_g1	2	1	23	304	326	TGAAACCGTTGTATGCATACAAG	|*||||||||:|||||||||||*	AGTTTGGCAATATACGTATGTTG	gi|672140905|ref|XP_008794268.1|( PREDICTED: ubiquitin-conjugating enzyme E2 4-like [Phoenix dactylifera])
	TRINITY_DN88765_c2_g1	2	1	23	3838	3860	TGAAACCGTTGTATGCATACAAG	|:||||||||:|||:|||||||*	ATTTTGGCAATATATGTATGTTG	gi|731320199|ref|XP_010670678.1|( PREDICTED: septin and tuftelin-interacting protein 1 homolog 1 [Beta vulgaris subsp. vulgaris])
	TRINITY_DN88798_c2_g1	2	1	23	242	264	TGAAACCGTTGTATGCATACAAG	|||*|||||||||:||||||||*	ACTCTGGCAACATGCGTATGTTG	gi|902171778|gb|KNA08042.1|( hypothetical protein SOVF_166000 [Spinacia oleracea])
	TRINITY_DN89502_c4_g2	2	1	23	457	479	TGAAACCGTTGTATGCATACAAG	|:|||||:|||||:||||||||*	ATTTTGGTAACATGCGTATGTTA	gi|902189387|gb|KNA11358.1|( hypothetical protein SOVF_135950 [Spinacia oleracea])
	TRINITY_DN89533_c2_g1	2	1	23	1849	1871	TGAAACCGTTGTATGCATACAAG	|:|||||||||||:|||||*||*	ATTTTGGCAACATGCGTATATTG	gi|731324902|ref|XP_010673222.1|( PREDICTED: pentatricopeptide repeat-containing protein At1g05600 [Beta vulgaris subsp. vulgaris])
	TRINITY_DN89606_c1_g1	2	1	23	2719	2742	TGAAACCGTTGTATGCATACAA-G	|||*|||||||||:||||||||*|	ACTCTGGCAACATGCGTATGTTAC	gi|731350968|ref|XP_010686787.1|( PREDICTED: calcium permeable stress-gated cation channel 1 [Beta vulgaris subsp. vulgaris])
	TRINITY_DN89856_c0_g1	2	1	23	138	160	TGAAACCGTTGTATGCATACAAG	|||||||:||||||*|||||||*	ACTTTGGTAACATAAGTATGTTG	gi|731373432|ref|XP_010666645.1|( PREDICTED: pentatricopeptide repeat-containing protein At1g15510, chloroplastic isoform X1 [Beta vulgaris subsp. vulgaris])
	TRINITY_DN91568_c0_g2	2	1	23	2364	2386	TGAAACCGTTGTATGCATACAAG	||||||**|||||||||||||||	ACTTTGTAAACATACGTATGTTC	gi|731340432|ref|XP_010681390.1|( PREDICTED: uncharacterized protein LOC104896346 [Beta vulgaris subsp. vulgaris])
	TRINITY_DN92778_c5_g2	2	1	23	552	575	TGAAACCGTTGTATGCATACAA-G	|:|*||||||||||||||||||*|	ATTCTGGCAACATACGTATGTTGC	gi|565341851|ref|XP_006338084.1|( PREDICTED: chaperone protein DnaJ [Solanum tuberosum])
	TRINITY_DN92470_c4_g2	2	1	23	926	948	TGAAACCGTTGTATGCATACAAG	||||||*|||||||||||||*|*	ACTTTGCCAACATACGTATGGTA	gi|731326247|ref|XP_010673923.1|( PREDICTED: uncharacterized protein LOC104890222 isoform X1 [Beta vulgaris subsp. vulgaris])
Phn-m0184-3p	TRINITY_DN88384_c0_g1	1.8	1	24	1939	1963	GGTTTAAACCGTATCGTATTCGT-T	:*|||||||||||||||||||||*|	TAAAATTTGGCATAGCATAAGCATA	gi|902181404|gb|KNA09733.1|( hypothetical protein SOVF_150900 [Spinacia oleracea])
Phn-m0198-3p	TRINITY_DN93205_c1_g1	0.8	1	23	557	579	CTAATTCTGAAAACCGCACCCGT	||||:|||||||||||||||||:	GATTGAGACTTTTGGCGTGGGCG	gi|731327255|ref|XP_010674428.1|( PREDICTED: protein CHROMATIN REMODELING 24 [Beta vulgaris subsp. vulgaris])
Phn-m0217-3p	TRINITY_DN85301_c0_g2	2	1	22	1367	1388	TAGGATGTTGACTTTGGCTATC	||||||||::|||||||||*|*	ATCCTACAGTTGAAACCGAAAC	gi|731350543|ref|XP_010686556.1|( PREDICTED: splicing factor 3B subunit 2 [Beta vulgaris subsp. vulgaris])
Phn-m0274-5p	TRINITY_DN90695_c2_g1	0	1	22	1531	1552	TTATGTCACCAGATTCTTTAAA	||||||||||||||||||||||	AATACAGTGGTCTAAGAAATTT	gi|902231760|gb|KNA22390.1|( hypothetical protein SOVF_034390 [Spinacia oleracea])
Phn-m0279-3p	TRINITY_DN90773_c2_g1	0.5	1	23	245	268	TTGGGACACATGTTAGAA-AAACC	||||||||||||||||||*|||||	AACCCTGTGTACAATCTTTTTTGG	gi|902212077|gb|KNA16866.1|( hypothetical protein SOVF_084150 [Spinacia oleracea])
	TRINITY_DN86164_c3_g1	1.5	1	23	2634	2656	TTGGGACACATGTTAGAAAAACC	||:|||||||:||||:|||||||	AATCCTGTGTGCAATTTTTTTGG	gi|731326787|ref|XP_010674196.1|( PREDICTED: putative F-box protein PP2-B12 [Beta vulgaris subsp. vulgaris])
	TRINITY_DN89217_c0_g7	1.5	1	23	1306	1327	TTGGGACACATGTTAGAAAAACC	||::|||||||||||||*|||||	AATTCTGTGTACAATCT-TTTGG	gi|902234864|gb|KNA23618.1|( hypothetical protein SOVF_023340 [Spinacia oleracea])
	TRINITY_DN92606_c1_g2	1.5	1	23	2659	2680	TTGGGACACATGTTAGAAAAACC	|:||||||||||:||||*|||||	AGCCCTGTGTACGATCT-TTTGG	gi|902198182|gb|KNA13613.1|( hypothetical protein SOVF_115070 [Spinacia oleracea])
	TRINITY_DN87660_c0_g2	2	1	23	3508	3530	TTGGGACACATGTTAGAAAAACC	||:|||*|||||||||||||*||	AATCCTATGTACAATCTTTTGGG	gi|731326237|ref|XP_010673918.1|( PREDICTED: leucine-rich repeat receptor-like protein CLAVATA2 [Beta vulgaris subsp. vulgaris])
	TRINITY_DN91855_c2_g7	2	1	23	1996	2017	TTGGGACACATGTTAGAAAAACC	|||:||||||::|||||*|||||	AACTCTGTGTGTAATCT-TTTGG	gi|902209816|gb|KNA16278.1|( hypothetical protein SOVF_090540 [Spinacia oleracea])

## Sheet: downregulated miRNAs
miRNAs	target gene	score	query_start	query_end	target_start	target_end	query_seq	align	target_seq	nr
miR159b-5p	TRINITY_DN88193_c1_g1	2	1	21	1245	1265	GAGCTCCTTGAAGTTCAATGG	*|:|||||||||||||||:*:	GTTGAGGAACTTCAAGTTGGT	gi|1035955740|gb|OAY77484.1|( Cysteine proteinase inhibitor 12 [Ananas comosus])
miR160d-5p	TRINITY_DN86715_c5_g3	1.8	1	21	195	215	TGCCTGGCTCCCTGTATGCCA	:||||||||*||||||||||*	GCGGACCGAAGGACATACGGA	gi|731363367|ref|XP_010693396.1|( PREDICTED: auxin response factor 18-like isoform X2 [Beta vulgaris subsp. vulgaris])
miR165a-3p	TRINITY_DN91558_c0_g7	1.2	1	21	1115	1135	TCGGACCAGGCTTCATCCCCC	:||||||||||||||||||**	GGCCTGGTCCGAAGTAGGGTC	gi|731356182|ref|XP_010689538.1|( PREDICTED: homeobox-leucine zipper protein REVOLUTA-like [Beta vulgaris subsp. vulgaris])
miR166a-3p	TRINITY_DN91558_c0_g3	1.2	1	21	1237	1257	TCGGACCAGGCTTCATTCCCC	:||||||||||||||||||**	GGCCTGGTCCGAAGTAAGGTC	gi|731359700|ref|XP_010691422.1|( PREDICTED: homeobox-leucine zipper protein ATHB-15-like isoform X1 [Beta vulgaris subsp. vulgaris])
	TRINITY_DN91558_c0_g5	1.2	1	21	1440	1460	TCGGACCAGGCTTCATTCCCC	:||||||||||||||||||**	GGCCTGGTCCGAAGTAAGGTC	gi|902170490|gb|KNA07846.1|( hypothetical protein SOVF_168070 [Spinacia oleracea])
	TRINITY_DN91558_c0_g8	1.2	1	21	713	733	TCGGACCAGGCTTCATTCCCC	:||||||||||||||||||**	GGCCTGGTCCGAAGTAAGGTC	gi|731317331|ref|XP_010668539.1|( PREDICTED: homeobox-leucine zipper protein ATHB-8-like [Beta vulgaris subsp. vulgaris])
	TRINITY_DN91558_c0_g7	1.8	1	21	1115	1135	TCGGACCAGGCTTCATTCCCC	:|||||||||||||||:||**	GGCCTGGTCCGAAGTAGGGTC	gi|731356182|ref|XP_010689538.1|( PREDICTED: homeobox-leucine zipper protein REVOLUTA-like [Beta vulgaris subsp. vulgaris])
miR166g-5p	TRINITY_DN86562_c1_g1	2	1	21	2256	2275	GGAATGTTGTCTGGCTCGAGG	|:||||:|||||:|||||*||	CTTTACGACAGATCGAGC-CC	gi|731316606|ref|XP_010696215.1|( PREDICTED: uncharacterized protein LOC104908761 isoform X1 [Beta vulgaris subsp. vulgaris])
miR166i-3p	TRINITY_DN91558_c0_g3	1.8	1	21	1237	1257	TCGGATCAGGCTTCATTCCTC	:||||:|||||||||||||**	GGCCTGGTCCGAAGTAAGGTC	gi|731359700|ref|XP_010691422.1|( PREDICTED: homeobox-leucine zipper protein ATHB-15-like isoform X1 [Beta vulgaris subsp. vulgaris])
	TRINITY_DN91558_c0_g5	1.8	1	21	1440	1460	TCGGATCAGGCTTCATTCCTC	:||||:|||||||||||||**	GGCCTGGTCCGAAGTAAGGTC	gi|902170490|gb|KNA07846.1|( hypothetical protein SOVF_168070 [Spinacia oleracea])
	TRINITY_DN91558_c0_g8	1.8	1	21	713	733	TCGGATCAGGCTTCATTCCTC	:||||:|||||||||||||**	GGCCTGGTCCGAAGTAAGGTC	gi|731317331|ref|XP_010668539.1|( PREDICTED: homeobox-leucine zipper protein ATHB-8-like [Beta vulgaris subsp. vulgaris])
miR166k	TRINITY_DN91558_c0_g3	0.5	1	21	1238	1258	TCCGGACCAGGCTTCATTCCC	||||||||||||||||||||*	AGGCCTGGTCCGAAGTAAGGT	gi|731359700|ref|XP_010691422.1|( PREDICTED: homeobox-leucine zipper protein ATHB-15-like isoform X1 [Beta vulgaris subsp. vulgaris])
	TRINITY_DN91558_c0_g5	0.5	1	21	1441	1461	TCCGGACCAGGCTTCATTCCC	||||||||||||||||||||*	AGGCCTGGTCCGAAGTAAGGT	gi|902170490|gb|KNA07846.1|( hypothetical protein SOVF_168070 [Spinacia oleracea])
	TRINITY_DN91558_c0_g7	0.5	1	21	1117	1136	TCCGGACCAGGCTTCATTCCC	|||||||||||||||||*|||	AGGCCTGGTCCGAAGTA-GGG	gi|731356182|ref|XP_010689538.1|( PREDICTED: homeobox-leucine zipper protein REVOLUTA-like [Beta vulgaris subsp. vulgaris])
	TRINITY_DN91558_c0_g8	0.5	1	21	714	734	TCCGGACCAGGCTTCATTCCC	||||||||||||||||||||*	AGGCCTGGTCCGAAGTAAGGT	gi|731317331|ref|XP_010668539.1|( PREDICTED: homeobox-leucine zipper protein ATHB-8-like [Beta vulgaris subsp. vulgaris])
miR166n	TRINITY_DN91558_c0_g3	1.2	1	21	1237	1257	TCGGACCAGGCTTCATTCCTT	:||||||||||||||||||**	GGCCTGGTCCGAAGTAAGGTC	gi|731359700|ref|XP_010691422.1|( PREDICTED: homeobox-leucine zipper protein ATHB-15-like isoform X1 [Beta vulgaris subsp. vulgaris])
	TRINITY_DN91558_c0_g5	1.2	1	21	1440	1460	TCGGACCAGGCTTCATTCCTT	:||||||||||||||||||**	GGCCTGGTCCGAAGTAAGGTC	gi|902170490|gb|KNA07846.1|( hypothetical protein SOVF_168070 [Spinacia oleracea])
	TRINITY_DN91558_c0_g8	1.2	1	21	713	733	TCGGACCAGGCTTCATTCCTT	:||||||||||||||||||**	GGCCTGGTCCGAAGTAAGGTC	gi|731317331|ref|XP_010668539.1|( PREDICTED: homeobox-leucine zipper protein ATHB-8-like [Beta vulgaris subsp. vulgaris])
	TRINITY_DN91558_c0_g7	1.8	1	21	1115	1135	TCGGACCAGGCTTCATTCCTT	:|||||||||||||||:||**	GGCCTGGTCCGAAGTAGGGTC	gi|731356182|ref|XP_010689538.1|( PREDICTED: homeobox-leucine zipper protein REVOLUTA-like [Beta vulgaris subsp. vulgaris])
miR171c-3p	TRINITY_DN92867_c1_g1	0.5	1	21	639	659	TTGAGCCGTGCCAATATCACG	||||||||||||||||||||*	AACTCGGCACGGTTATAGTGA	gi|902231904|gb|KNA22440.1|( hypothetical protein SOVF_034090 isoform B [Spinacia oleracea])
	TRINITY_DN87736_c6_g2	1.5	1	21	1520	1540	TTGAGCCGTGCCAATATCACG	:|*|||||||||||||||||:	GAGTCGGCACGGTTATAGTGT	gi|902207025|gb|KNA15602.1|( hypothetical protein SOVF_096770 [Spinacia oleracea])
	TRINITY_DN81279_c0_g2	1.8	1	21	542	562	TTGAGCCGTGCCAATATCACG	|||||||:|:|||||||||*:	AACTCGGTATGGTTATAGTTT	gi|731365020|ref|XP_010694296.1|( PREDICTED: uncharacterized protein At5g01610 [Beta vulgaris subsp. vulgaris])
miR171e-3p	TRINITY_DN92867_c1_g1	0	1	21	642	662	TGATTGAGCCGTGCCAATATC	|||||||||||||||||||||	ACTAACTCGGCACGGTTATAG	gi|902231904|gb|KNA22440.1|( hypothetical protein SOVF_034090 isoform B [Spinacia oleracea])
miR393a-5p	TRINITY_DN87142_c0_g1	1	1	22	4231	4252	TCCAAAGGGATCGCATTGATCC	||||||||||||||||||*|*|	AGGTTTCCCTAGCGTAACAAAG	gi|731343631|ref|XP_010682986.1|( PREDICTED: protein AUXIN SIGNALING F-BOX 2-like [Beta vulgaris subsp. vulgaris])
miR393a-5p	TRINITY_DN87142_c0_g3	1	1	22	46	68	TCCAAAGGGATCGCATTG-ATCC	||||||||||||||||||**|||	AGGTTTCCCTAGCGTAACAGAGG	gi|902176431|gb|KNA08757.1|( hypothetical protein SOVF_159810 [Spinacia oleracea])
miR399a	TRINITY_DN86649_c2_g2	0	1	21	1115	1135	TGCCAAAGGAGAATTGCCCTG	|||||||||||||||||||||	ACGGTTTCCTCTTAACGGGAC	gi|225463450|ref|XP_002272654.1|( PREDICTED: agamous-like MADS-box protein AGL62 [Vitis vinifera])
	TRINITY_DN86988_c0_g5	1.8	1	21	1864	1884	TGCCAAAGGAGAATTGCCCTG	:|||||||:|||*||||||||	GCGGTTTCTTCTGAACGGGAC	gi|902152673|gb|KNA05625.1|( hypothetical protein SOVF_188630 [Spinacia oleracea])
	TRINITY_DN88898_c0_g3	2	1	21	2406	2426	TGCCAAAGGAGAATTGCCCTG	*|||||||||:||||*|||||	TCGGTTTCCTTTTAAGGGGAC	gi|731372151|ref|XP_010666260.1|( PREDICTED: RNA polymerase-associated protein CTR9 homolog [Beta vulgaris subsp. vulgaris])
	TRINITY_DN92777_c2_g3	2	1	21	1465	1485	TGCCAAAGGAGAATTGCCCTG	||||*|||||||||:||*|||	ACGGGTTCCTCTTAGCGCGAC	gi|971579272|ref|XP_015158921.1|( PREDICTED: agamous-like MADS-box protein AGL62 [Solanum tuberosum])
miR399h	TRINITY_DN86649_c2_g2	1.5	1	21	1115	1135	TGCCAAAGGAGACTTGCCCAG	||||||||||||*||||||*|	ACGGTTTCCTCTTAACGGGAC	gi|225463450|ref|XP_002272654.1|( PREDICTED: agamous-like MADS-box protein AGL62 [Vitis vinifera])
	TRINITY_DN86988_c0_g5	1.2	1	21	1864	1884	TGCCAAAGGAGACTTGCCCAG	:|||||||:||||||||||*|	GCGGTTTCTTCTGAACGGGAC	gi|902152673|gb|KNA05625.1|( hypothetical protein SOVF_188630 [Spinacia oleracea])
Phn-m0162-5p	TRINITY_DN88264_c1_g1	0	1	24	972	995	AAATGAGATTGTACCACCGGGTGG	||||||||||||||||||||||||	TTTACTCTAACATGGTGGCCCACC	gi|694325453|ref|XP_009353670.1|( PREDICTED: outer envelope pore protein 16, chloroplastic-like isoform X3 [Pyrus x bretschneideri])
	TRINITY_DN87515_c2_g1	1.5	1	24	5662	5686	AAATGAGATTGTACCACCGGGTG-G	||||||||||||*||||||||||*|	TTTACTCTAACACGGTGGCCCACAC	gi|731336089|ref|XP_010679069.1|( PREDICTED: putative acyl-activating enzyme 19 [Beta vulgaris subsp. vulgaris])
	TRINITY_DN85334_c0_g1	1.8	1	24	873	896	AAATGAGATTGTACCACCGGGTGG	||||:|||||||*|||||||:|||	TTTATTCTAACACGGTGGCCTACC	gi|902205266|gb|KNA15134.1|( hypothetical protein SOVF_101060 [Spinacia oleracea])
	TRINITY_DN86017_c2_g7	1.8	1	24	532	556	AAATGAGATTGTACCACC-GGGTGG	||||||||||||||||||*::||:*	TTTACTCTAACATGGTGGATTCATG	gi|902099075|gb|KNA03455.1|( hypothetical protein SOVF_209020 [Spinacia oleracea])
	TRINITY_DN92342_c0_g2	1.8	1	24	464	487	AAATGAGATTGTACCACCGGGTGG	|||||||||||:*|||||:|||||	TTTACTCTAACGCGGTGGTCCACC	gi|902181198|gb|KNA09693.1|( hypothetical protein SOVF_151260 [Spinacia oleracea])
	TRINITY_DN86866_c1_g2	2	1	24	1885	1907	AAATGAGATTGTACCACCGGGTGG	|||||||||||:||*|||*|||||	TTTACTCTAACGTGATGG-CCACC	gi|902162298|gb|KNA06666.1|( hypothetical protein SOVF_178900 [Spinacia oleracea])
	TRINITY_DN90017_c3_g1	2	1	24	2549	2572	AAATGAGATTGTACCACCGGGTGG	|||||||*||||||||||*|||::	TTTACTCAAACATGGTGGGCCATT	gi|731311172|ref|XP_010692909.1|( PREDICTED: vegetative cell wall protein gp1 isoform X1 [Beta vulgaris subsp. vulgaris])
	TRINITY_DN91369_c0_g10	2	1	24	1498	1521	AAATGAGATTGTACCACCGGGTGG	||||||||||||*|||*|||||||	TTTACTCTAACACGGTAGCCCACC	gi|731364516|ref|XP_010694014.1|( PREDICTED: stem-specific protein TSJT1 [Beta vulgaris subsp. vulgaris])
	TRINITY_DN92704_c1_g1	2	1	24	993	1016	AAATGAGATTGTACCACCGGGTGG	||||||||||||*|||||||*|::	TTTACTCTAACACGGTGGCCAATT	gi|731339876|ref|XP_010681093.1|( PREDICTED: uncharacterized protein LOC104896091 isoform X1 [Beta vulgaris subsp. vulgaris])
Phn-m0225-3p	TRINITY_DN92852_c0_g1	1.8	1	21	2051	2071	GGCCTGAATTGCAATTTAGTT	||*||||||||||||||*|:|	CCAGACTTAACGTTAAACCGA	gi|902158936|gb|KNA06277.1|( hypothetical protein SOVF_182640 [Spinacia oleracea])
