# Supplementary material for: Integrated Analyses of miRNAome and Transcriptome Reveal The Function of miRNAs in Morphogenesis of Organs and Defense of Endophytes in Pseudostellaria Heterophylla
Source: Research Square preprint supplement (doi:10.21203/rs.3.rs-239755/v1), 2021-03-01
Supplement: Supplementary file 20 [file dc702cf19fe0c5d516639e50.xlsx]

## Sheet: upregulated miRNAs
miRNAs	target gene	score	query_start	query_end	target_start	target_end	query_seq	align	target_seq	nr
miR156e	TRINITY_DN69898_c0_g1	2	1	21	410	430	TTGACAGAAGATAGAGAGCAC	||*||||||||*|||||||||	AAATGTCTTCTTTCTCTCGTG	gi|731324125|ref|XP_010672800.1|( PREDICTED: zinc finger MYM-type protein 1-like [Beta vulgaris subsp. vulgaris])
	TRINITY_DN84801_c0_g1	1	1	21	1791	1811	TTGACAGAAGATAGAGAGCAC	|||||||||||*|||||||||	AACTGTCTTCTCTCTCTCGTG	gi|731343152|ref|XP_010682751.1|( PREDICTED: squamosa promoter-binding-like protein 2 [Beta vulgaris subsp. vulgaris])
	TRINITY_DN84801_c0_g2	1	1	21	2300	2320	TTGACAGAAGATAGAGAGCAC	|||||||||||*|||||||||	AACTGTCTTCTCTCTCTCGTG	gi|731343152|ref|XP_010682751.1|( PREDICTED: squamosa promoter-binding-like protein 2 [Beta vulgaris subsp. vulgaris])
	TRINITY_DN85556_c3_g2	2	1	21	1001	1021	TTGACAGAAGATAGAGAGCAC	*||||||||||:||||||*|*	CACTGTCTTCTGTCTCTCTTA	gi|902159213|gb|KNA06311.1|( hypothetical protein SOVF_182260 [Spinacia oleracea])
	TRINITY_DN90116_c0_g1	2	1	21	707	727	TTGACAGAAGATAGAGAGCAC	*||||||||||*||||||||*	CACTGTCTTCTCTCTCTCGTT	gi|731329270|ref|XP_010675500.1|( PREDICTED: squamosa promoter-binding-like protein 4 [Beta vulgaris subsp. vulgaris])
miR169d	TRINITY_DN88802_c2_g1	2	1	21	1895	1916	TAGCCAAGGATGAATTGCC-GG	*||||||||||||*|||||*||	TTCGGTTCCTACTCAACGGACC	gi|902218597|gb|KNA18080.1|( hypothetical protein SOVF_074230 [Spinacia oleracea])
	TRINITY_DN88802_c2_g3	2	1	21	2771	2791	TAGCCAAGGATGAATTGCCGG	*||||||||||||*|||||::	TTCGGTTCCTACTCAACGGTT	gi|902218597|gb|KNA18080.1|( hypothetical protein SOVF_074230 [Spinacia oleracea])
	TRINITY_DN93270_c2_g2	1.5	1	21	4408	4428	TAGCCAAGGATGAATTGCCGG	:||||||||||||*||||||:	GTCGGTTCCTACTGAACGGCT	gi|731317972|ref|XP_010669470.1|( PREDICTED: uncharacterized protein LOC104886694 [Beta vulgaris subsp. vulgaris])
miR828b-5p	TRINITY_DN87568_c2_g3	1.5	1	22	459	480	TCTTGCTCAAATGAGTATTCCA	||:||||||||||||*||||||	AGGACGAGTTTACTCTTAAGGT	gi|1005743107|gb|AMQ23629.1|( myb transcription factor 4 [Silene littorea])
Phn-m0024-3p	TRINITY_DN81392_c0_g1	1	1	21	269	289	TTTTGAACAATGTATACAACT	|||||||||||||||||*|*|	AAAACTTGTTACATATGGTAA	gi|870852322|gb|KMT04251.1|( hypothetical protein BVRB_8g183270 [Beta vulgaris subsp. vulgaris])
	TRINITY_DN83550_c0_g1	2	1	21	1540	1559	TTTTGAACAATGTATACAACT	||||||||||||:|||*|*||	AAAACTTGTTACGTAT-TGGA	gi|731324894|ref|XP_010673218.1|( PREDICTED: RNA polymerase-associated protein C651.09c-like [Beta vulgaris subsp. vulgaris])
	TRINITY_DN87170_c0_g1	1.5	1	21	662	682	TTTTGAACAATGTATACAACT	|||||||||||::||||||*|	AAAACTTGTTATGTATGTTAA	gi|902232936|gb|KNA22854.1|( hypothetical protein SOVF_030060 [Spinacia oleracea])
	TRINITY_DN87773_c0_g1	2	1	21	1282	1302	TTTTGAACAATGTATACAACT	|||||||||||:||:|*||||	AAAACTTGTTATATGTTTTGA	gi|731330332|ref|XP_010676075.1|( PREDICTED: ABC transporter G family member 26 [Beta vulgaris subsp. vulgaris])
	TRINITY_DN88918_c5_g1	1.8	1	21	245	265	TTTTGAACAATGTATACAACT	*||||||*||||||||||||:	CAAACTTTTTACATATGTTGG	gi|731331669|ref|XP_010676781.1|( PREDICTED: importin-11 isoform X2 [Beta vulgaris subsp. vulgaris])
	TRINITY_DN89071_c0_g1	2	1	21	1684	1705	TTTTGAACAATGTATACAA-CT	|||||||*|||:|||||||*||	AAAACTTTTTATATATGTTAGA	gi|731355990|ref|XP_010689433.1|( PREDICTED: arogenate dehydratase/prephenate dehydratase 2, chloroplastic-like [Beta vulgaris subsp. vulgaris])
	TRINITY_DN89670_c3_g2	1.5	1	21	2456	2476	TTTTGAACAATGTATACAACT	|:|||||||||:|||||||*|	AGAACTTGTTATATATGTTCA	gi|1025202298|ref|XP_016477383.1|( PREDICTED: 1-aminocyclopropane-1-carboxylate oxidase homolog 1-like [Nicotiana tabacum])
	TRINITY_DN90343_c1_g6	0.5	1	21	350	370	TTTTGAACAATGTATACAACT	|||||||||||||||||||*|	AAAACTTGTTACATATGTTAA	gi|641841563|gb|KDO60475.1|( hypothetical protein CISIN_1g004078mg [Citrus sinensis])
	TRINITY_DN91758_c0_g3	1.5	1	21	145	166	TTTTGAACAATGTATACAA-CT	|||||||*|||||||||||*||	AAAACTTTTTACATATGTTAGA	gi|731317298|ref|XP_010668434.1|( PREDICTED: ultraviolet-B receptor UVR8 [Beta vulgaris subsp. vulgaris])
Phn-m0077-5p	TRINITY_DN85642_c1_g2	0.5	1	24	2530	2553	ATCGACGCAATCTTCACCTTGGGT	|||||||||||||||||*||||||	TAGCTGCGTTAGAAGTGAAACCCA	gi|731341900|ref|XP_010682128.1|( PREDICTED: survival of motor neuron-related-splicing factor 30 [Beta vulgaris subsp. vulgaris])
	TRINITY_DN86156_c6_g1	0.5	1	24	1098	1121	ATCGACGCAATCTTCACCTTGGGT	|||||||||||||||||||||*||	TAGCTGCGTTAGAAGTGGAACGCA	gi|731318303|ref|XP_010669646.1|( PREDICTED: RNA pseudouridine synthase 5 [Beta vulgaris subsp. vulgaris])
	TRINITY_DN86711_c2_g1	0.5	1	24	1898	1921	ATCGACGCAATCTTCACCTTGGGT	||||||||||:|||||||||||||	TAGCTGCGTTGGAAGTGGAACCCA	gi|731320833|ref|XP_010671022.1|( PREDICTED: galactokinase [Beta vulgaris subsp. vulgaris])
	TRINITY_DN86989_c2_g2	1.2	1	24	4357	4380	ATCGACGCAATCTTCACCTTGGGT	|||:||||||||||||||||*|:|	TAGTTGCGTTAGAAGTGGAAACTA	gi|731352776|ref|XP_010687715.1|( PREDICTED: leucine aminopeptidase 1-like [Beta vulgaris subsp. vulgaris])
	TRINITY_DN87013_c10_g3	0	1	24	758	781	ATCGACGCAATCTTCACCTTGGGT	||||||||||||||||||||||||	TAGCTGCGTTAGAAGTGGAACCCA	gi|731345613|ref|XP_010684010.1|( PREDICTED: uncharacterized protein LOC104898613 [Beta vulgaris subsp. vulgaris])
	TRINITY_DN87265_c4_g1	1.8	1	24	660	683	ATCGACGCAATCTTCACCTTGGGT	||||||:*|||||||||||:||||	TAGCTGTATTAGAAGTGGAGCCCA	gi|659102184|ref|XP_008451995.1|( PREDICTED: uncharacterized protein LOC103493134 [Cucumis melo])
	TRINITY_DN87445_c4_g1	1.5	1	24	2843	2866	ATCGACGCAATCTTCACCTTGGGT	*|*|||||||||||||||||||||	CACCTGCGTTAGAAGTGGAACCCA	gi|902228698|gb|KNA21222.1|( hypothetical protein SOVF_045310 [Spinacia oleracea])
	TRINITY_DN89209_c0_g1	0	1	24	977	1000	ATCGACGCAATCTTCACCTTGGGT	||||||||||||||||||||||||	TAGCTGCGTTAGAAGTGGAACCCA	gi|147798181|emb|CAN73890.1|( hypothetical protein VITISV_033644 [Vitis vinifera])
	TRINITY_DN89502_c5_g1	0.5	1	24	89	112	ATCGACGCAATCTTCACCTTGGGT	|||||||||||||||||||||*||	TAGCTGCGTTAGAAGTGGAACGCA	gi|902187803|gb|KNA10993.1|( hypothetical protein SOVF_139300 isoform A [Spinacia oleracea])
	TRINITY_DN89575_c7_g1	1.5	1	24	1225	1248	ATCGACGCAATCTTCACCTTGGGT	||||||||||||||||**||||||	TAGCTGCGTTAGAAGTAAAACCCA	gi|731319551|ref|XP_010670332.1|( PREDICTED: uncharacterized protein LOC104887411 isoform X1 [Beta vulgaris subsp. vulgaris])
	TRINITY_DN90755_c1_g1	0	1	24	25	48	ATCGACGCAATCTTCACCTTGGGT	||||||||||||||||||||||||	TAGCTGCGTTAGAAGTGGAACCCA	gi|731334171|ref|XP_010678089.1|( PREDICTED: probable protein S-acyltransferase 16 isoform X2 [Beta vulgaris subsp. vulgaris])
	TRINITY_DN91147_c2_g3	0.8	1	24	12	35	ATCGACGCAATCTTCACCTTGGGT	||||||:||||||||||||:||||	TAGCTGTGTTAGAAGTGGAGCCCA	gi|147853716|emb|CAN80219.1|( hypothetical protein VITISV_027891 [Vitis vinifera])
	TRINITY_DN92873_c1_g1	0.5	1	24	67	89	ATCGACGCAATCTTCACCTTGGGT	|||||||||||||||||*||||||	TAGCTGCGTTAGAAGTG-AACCCA	gi|729450681|ref|XP_010523483.1|( PREDICTED: 26S proteasome non-ATPase regulatory subunit 10 [Tarenaya hassleriana])
	TRINITY_DN93095_c2_g2	1.5	1	24	15	38	ATCGACGCAATCTTCACCTTGGGT	|||:|||||||*||||||||||||	TAGTTGCGTTAAAAGTGGAACCCA	gi|902172949|gb|KNA08189.1|( hypothetical protein SOVF_164890 isoform A [Spinacia oleracea])
Phn-m0082-3p	TRINITY_DN86347_c0_g3	2	1	22	2910	2931	AACGTGAACAATCTGATGTATC	|||||:|||||:||||:||||*	TTGCATTTGTTGGACTGCATAA	gi|902183095|gb|KNA10045.1|( hypothetical protein SOVF_148030 isoform B, partial [Spinacia oleracea])
	TRINITY_DN86357_c7_g3	2	1	22	677	698	AACGTGAACAATCTGATGTATC	|||||:|||||:|||||||*|*	TTGCATTTGTTGGACTACAGAT	gi|731356722|ref|XP_010689828.1|( PREDICTED: uncharacterized protein LOC104903488 [Beta vulgaris subsp. vulgaris])
	TRINITY_DN86382_c0_g1	1	1	22	143	164	AACGTGAACAATCTGATGTATC	|||||:||||||||:|||||||	TTGCATTTGTTAGATTACATAG	gi|902203607|gb|KNA14614.1|( hypothetical protein SOVF_105800 [Spinacia oleracea])
	TRINITY_DN86457_c3_g1	2	1	22	265	286	AACGTGAACAATCTGATGTATC	|||||:|||||*||:|||||||	TTGCATTTGTTTGATTACATAG	gi|695007501|ref|XP_009390299.1|( PREDICTED: 40S ribosomal protein S16 [Musa acuminata subsp. malaccensis])
	TRINITY_DN86595_c0_g1	1.8	1	22	1320	1341	AACGTGAACAATCTGATGTATC	|||||:|||||:||||||:||*	TTGCATTTGTTGGACTACGTAT	gi|731317503|ref|XP_010669165.1|( PREDICTED: uncharacterized protein DDB_G0283357-like [Beta vulgaris subsp. vulgaris])
	TRINITY_DN86731_c0_g1	2	1	22	1186	1207	AACGTGAACAATCTGATGTATC	|||||:|||||*|||||||||*	TTGCATTTGTTCGACTACATAA	gi|902213372|gb|KNA17259.1|( hypothetical protein SOVF_081690 [Spinacia oleracea])
	TRINITY_DN87211_c2_g8	1.5	1	22	998	1019	AACGTGAACAATCTGATGTATC	|||||:|||||:||:|||||||	TTGCATTTGTTGGATTACATAG	gi|125603077|gb|EAZ42402.1|( hypothetical protein OsJ_26980 [Oryza sativa Japonica Group])
	TRINITY_DN87428_c0_g1	1.5	1	22	1139	1160	AACGTGAACAATCTGATGTATC	|||||:*|||||||||||||||	TTGCATCTGTTAGACTACATAG	gi|976921176|gb|KVI05876.1|( Protein phosphatase 2A, regulatory subunit PR55 [Cynara cardunculus var. scolymus])
	TRINITY_DN87725_c0_g3	2	1	22	3149	3170	AACGTGAACAATCTGATGTATC	|||:|:||||||||*|||||||	TTGTATTTGTTAGAATACATAG	gi|902179297|gb|KNA09325.1|( hypothetical protein SOVF_154700 isoform B [Spinacia oleracea])
	TRINITY_DN87952_c0_g1	1.2	1	22	2777	2798	AACGTGAACAATCTGATGTATC	|||||:|||||:|||||:||||	TTGCATTTGTTGGACTATATAG	gi|902193964|gb|KNA12426.1|( hypothetical protein SOVF_126070 [Spinacia oleracea])
	TRINITY_DN88126_c1_g5	1.8	1	22	29	50	AACGTGAACAATCTGATGTATC	|||||:|||||:||:||:||||	TTGCATTTGTTGGATTATATAG	gi|902222130|gb|KNA19098.1|( hypothetical protein SOVF_064760 [Spinacia oleracea])
	TRINITY_DN88562_c0_g1	1.2	1	22	684	705	AACGTGAACAATCTGATGTATC	|||||:|||||||||||:|||*	TTGCATTTGTTAGACTATATAA	gi|902233323|gb|KNA22997.1|( hypothetical protein SOVF_028870 [Spinacia oleracea])
	TRINITY_DN88713_c2_g4	1.5	1	22	510	531	AACGTGAACAATCTGATGTATC	|||||:|||||:|||||||||*	TTGCATTTGTTGGACTACATAA	gi|731317284|ref|XP_010668385.1|( PREDICTED: carotenoid cleavage dioxygenase 8 homolog B, chloroplastic [Beta vulgaris subsp. vulgaris])
	TRINITY_DN89162_c2_g1	2	1	22	3407	3428	AACGTGAACAATCTGATGTATC	|||||:|||*||||:|||||||	TTGCATTTGATAGATTACATAG	gi|731336115|ref|XP_010679084.1|( PREDICTED: vicilin-like antimicrobial peptides 2-3 [Beta vulgaris subsp. vulgaris])
	TRINITY_DN89384_c3_g5	2	1	22	271	292	AACGTGAACAATCTGATGTATC	|||||:|||||:|:|||||||*	TTGCATTTGTTGGGCTACATAT	gi|763759108|gb|KJB26439.1|( hypothetical protein B456_004G241600 [Gossypium raimondii])
	TRINITY_DN89509_c1_g2	1.5	1	22	1603	1624	AACGTGAACAATCTGATGTATC	||*||:||||||||||||||||	TTACATTTGTTAGACTACATAG	gi|731350514|ref|XP_010686542.1|( PREDICTED: putative serine/threonine-protein kinase [Beta vulgaris subsp. vulgaris])
	TRINITY_DN89588_c6_g2	0.5	1	22	1367	1388	AACGTGAACAATCTGATGTATC	|||||:||||||||||||||||	TTGCATTTGTTAGACTACATAG	gi|902155639|gb|KNA05927.1|( hypothetical protein SOVF_185800 [Spinacia oleracea])
	TRINITY_DN89625_c2_g2	1	1	22	1562	1583	AACGTGAACAATCTGATGTATC	|||||:|||||||||||*||||	TTGCATTTGTTAGACTAAATAG	gi|902126215|gb|KNA04109.1|( hypothetical protein SOVF_202710 [Spinacia oleracea])
	TRINITY_DN89629_c1_g4	2	1	22	409	430	AACGTGAACAATCTGATGTATC	|||||:||*||:||||||||||	TTGCATTTCTTGGACTACATAG	gi|902186608|gb|KNA10728.1|( hypothetical protein SOVF_141620 [Spinacia oleracea])
	TRINITY_DN89645_c0_g3	2	1	22	123	144	AACGTGAACAATCTGATGTATC	|||||:|*|||:||||||||||	TTGCATTAGTTGGACTACATAG	gi|902184620|gb|KNA10329.1|( hypothetical protein SOVF_145390 [Spinacia oleracea])
	TRINITY_DN90027_c1_g10	2	1	22	1468	1489	AACGTGAACAATCTGATGTATC	|||||:|||||:*|||||||||	TTGCATTTGTTGAACTACATAG	gi|731358461|ref|XP_010690762.1|( PREDICTED: uncharacterized transmembrane protein DDB_G0289901-like [Beta vulgaris subsp. vulgaris])
	TRINITY_DN90066_c3_g3	2	1	22	104	125	AACGTGAACAATCTGATGTATC	|||||:||||||*|||||*|||	TTGCATTTGTTAAACTACTTAG	gi|902192273|gb|KNA11997.1|( hypothetical protein SOVF_129790 [Spinacia oleracea])
	TRINITY_DN90092_c1_g3	2	1	22	1540	1561	AACGTGAACAATCTGATGTATC	|||||:|||*|:||||||||||	TTGCATTTGGTGGACTACATAG	gi|731368637|ref|XP_010696254.1|( PREDICTED: putative ER lumen protein-retaining receptor C28H8.4 [Beta vulgaris subsp. vulgaris])
	TRINITY_DN90101_c3_g2	2	1	22	1349	1370	AACGTGAACAATCTGATGTATC	|||||:||||||*|||||*|||	TTGCATTTGTTAAACTACTTAG	gi|1035928984|gb|OAY58571.1|( hypothetical protein MANES_02G189200 [Manihot esculenta])
	TRINITY_DN90101_c3_g6	1	1	22	906	927	AACGTGAACAATCTGATGTATC	|||||:|||||:||||||||||	TTGCATTTGTTGGACTACATAG	gi|1023976459|gb|KZV19530.1|( hypothetical protein F511_06392 [Dorcoceras hygrometricum])
	TRINITY_DN90149_c3_g2	2	1	22	26	47	AACGTGAACAATCTGATGTATC	|||||:|||||:||*|||||||	TTGCATTTGTTGGAGTACATAG	gi|870851124|gb|KMT03190.1|( hypothetical protein BVRB_8g197390 [Beta vulgaris subsp. vulgaris])
	TRINITY_DN90150_c1_g2	1.8	1	22	2138	2159	AACGTGAACAATCTGATGTATC	|||||:|||||:||:||:||||	TTGCATTTGTTGGATTATATAG	gi|902188678|gb|KNA11211.1|( hypothetical protein SOVF_137280 isoform A [Spinacia oleracea])
	TRINITY_DN90376_c4_g2	2	1	22	1417	1437	AACGTGAACAATCTGATGTATC	|||:|:|||||:|||||*||||	TTGTATTTGTTGGACTA-ATAG	gi|902205157|gb|KNA15106.1|( hypothetical protein SOVF_101300 [Spinacia oleracea])
	TRINITY_DN90399_c4_g4	1.5	1	22	783	804	AACGTGAACAATCTGATGTATC	|||||:|||||:||:|||||||	TTGCATTTGTTGGATTACATAG	gi|731362699|ref|XP_010693024.1|( PREDICTED: G-protein coupled receptor 1 [Beta vulgaris subsp. vulgaris])
	TRINITY_DN90759_c4_g3	2	1	22	1043	1064	AACGTGAACAATCTGATGTATC	|||||:|||||:*|||||||||	TTGCATTTGTTGTACTACATAG	gi|731312672|ref|XP_010675835.1|( PREDICTED: protein FAM91A1 isoform X1 [Beta vulgaris subsp. vulgaris])
	TRINITY_DN90759_c4_g6	1.8	1	22	2501	2522	AACGTGAACAATCTGATGTATC	|||||:|||||:||:||:||||	TTGCATTTGTTGGATTATATAG	gi|802550613|ref|XP_012093075.1|( PREDICTED: snakin-1 [Jatropha curcas])
	TRINITY_DN90776_c4_g3	2	1	22	61	82	AACGTGAACAATCTGATGTATC	|||||:|||||:*|||||||||	TTGCATTTGTTGAACTACATAG	gi|641851714|gb|KDO70584.1|( hypothetical protein CISIN_1g015627mg [Citrus sinensis])
	TRINITY_DN90880_c0_g3	1.5	1	22	728	749	AACGTGAACAATCTGATGTATC	|||||:|||||:|||||||||*	TTGCATTTGTTGGACTACATAA	gi|902229708|gb|KNA21581.1|( hypothetical protein SOVF_041850 [Spinacia oleracea])
	TRINITY_DN91141_c0_g1	2	1	22	1763	1784	AACGTGAACAATCTGATGTATC	|||||:|||||*|||||||||*	TTGCATTTGTTCGACTACATAA	gi|731342570|ref|XP_010682459.1|( PREDICTED: beta-1,4-mannosyl-glycoprotein 4-beta-N-acetylglucosaminyltransferase isoform X1 [Beta vulgaris subsp. vulgaris])
	TRINITY_DN91165_c0_g8	0	1	22	391	412	AACGTGAACAATCTGATGTATC	||||||||||||||||||||||	TTGCACTTGTTAGACTACATAG	gi|902221836|gb|KNA19019.1|( hypothetical protein SOVF_065470 [Spinacia oleracea])
	TRINITY_DN91365_c0_g1	2	1	22	1981	2002	AACGTGAACAATCTGATGTATC	|||||:|||||:||:||*||||	TTGCATTTGTTGGATTAGATAG	gi|902234990|gb|KNA23677.1|( hypothetical protein SOVF_022680 [Spinacia oleracea])
	TRINITY_DN91646_c1_g1	1.8	1	22	107	128	AACGTGAACAATCTGATGTATC	|||:|:|||||||||||:|||*	TTGTATTTGTTAGACTATATAA	gi|731347681|ref|XP_010685111.1|( PREDICTED: transcription factor bHLH78 [Beta vulgaris subsp. vulgaris])
	TRINITY_DN91753_c0_g2	1.5	1	22	12	33	AACGTGAACAATCTGATGTATC	|||||:||*|||||||||||||	TTGCATTTATTAGACTACATAG	gi|1021548439|ref|XP_016165666.1|( PREDICTED: WAT1-related protein At5g64700-like [Arachis ipaensis])
	TRINITY_DN91787_c1_g2	1.8	1	22	2271	2292	AACGTGAACAATCTGATGTATC	|||||:|||||:||:||:||||	TTGCATTTGTTGGATTATATAG	gi|731327377|ref|XP_010674492.1|( PREDICTED: uncharacterized protein LOC104890634 [Beta vulgaris subsp. vulgaris])
	TRINITY_DN91841_c4_g1	2	1	22	171	192	AACGTGAACAATCTGATGTATC	|||||:||||||||*||*||||	TTGCATTTGTTAGAGTAGATAG	gi|902236143|gb|KNA24239.1|( hypothetical protein SOVF_017810 [Spinacia oleracea])
	TRINITY_DN92111_c0_g2	1	1	22	4078	4099	AACGTGAACAATCTGATGTATC	|||||:|||||||:||||||||	TTGCATTTGTTAGGCTACATAG	gi|731350576|ref|XP_010686573.1|( PREDICTED: uncharacterized protein At4g04980-like isoform X1 [Beta vulgaris subsp. vulgaris])
	TRINITY_DN92548_c7_g1	2	1	22	5542	5563	AACGTGAACAATCTGATGTATC	|||||:|||||:*|||||||||	TTGCATTTGTTGAACTACATAG	gi|902173126|gb|KNA08226.1|( hypothetical protein SOVF_164390 [Spinacia oleracea])
	TRINITY_DN92686_c0_g1	1.5	1	22	1058	1079	AACGTGAACAATCTGATGTATC	|||||:|||||:|||||||||*	TTGCATTTGTTGGACTACATAC	gi|731364629|ref|XP_010694079.1|( PREDICTED: monothiol glutaredoxin-S1-like [Beta vulgaris subsp. vulgaris])
	TRINITY_DN92815_c0_g2	1.5	1	22	2746	2767	AACGTGAACAATCTGATGTATC	|||||:|||||:|:||||||||	TTGCATTTGTTGGGCTACATAG	gi|731360761|ref|XP_010691994.1|( PREDICTED: obtusifoliol 14-alpha demethylase-like [Beta vulgaris subsp. vulgaris])
	TRINITY_DN93285_c2_g1	2	1	22	896	917	AACGTGAACAATCTGATGTATC	|||||:|||||:||*|||||||	TTGCATTTGTTGGAATACATAG	gi|731322269|ref|XP_010671799.1|( PREDICTED: probable LRR receptor-like serine/threonine-protein kinase At3g47570 [Beta vulgaris subsp. vulgaris])
Phn-m0098-3p	TRINITY_DN87225_c0_g3	0.5	1	24	142	165	ACCGTCGGTGTTTTACTTCATACC	||||||||:|||||||||||||||	TGGCAGCCGCAAAATGAAGTATGG	gi|731326292|ref|XP_010673945.1|( PREDICTED: basic leucine zipper and W2 domain-containing protein 2-like [Beta vulgaris subsp. vulgaris])
Phn-m0140-3p	TRINITY_DN91558_c0_g3	2	1	23	1233	1255	GGACCAGGCTTCATTCCCCCCAA	|||||||||||||||||***||*	CCTGGTCCGAAGTAAGGTCCGTA	gi|731359700|ref|XP_010691422.1|( PREDICTED: homeobox-leucine zipper protein ATHB-15-like isoform X1 [Beta vulgaris subsp. vulgaris])
	TRINITY_DN91558_c0_g5	2	1	23	1436	1458	GGACCAGGCTTCATTCCCCCCAA	|||||||||||||||||***||*	CCTGGTCCGAAGTAAGGTCCGTA	gi|902170490|gb|KNA07846.1|( hypothetical protein SOVF_168070 [Spinacia oleracea])
	TRINITY_DN91558_c0_g8	2	1	23	709	731	GGACCAGGCTTCATTCCCCCCAA	|||||||||||||||||***||*	CCTGGTCCGAAGTAAGGTCCGTA	gi|731317331|ref|XP_010668539.1|( PREDICTED: homeobox-leucine zipper protein ATHB-8-like [Beta vulgaris subsp. vulgaris])
Phn-m0208-5p	TRINITY_DN83323_c0_g1	1.2	1	24	2799	2822	ATCATTGGGCTTGTTTTGGGGGGT	|:|||:|||||||||||:||||||	TGGTAGCCCGAACAAAATCCCCCA	gi|902206320|gb|KNA15429.1|( hypothetical protein SOVF_098280, partial [Spinacia oleracea])
	TRINITY_DN87937_c0_g8	1.5	1	24	512	535	ATCATTGGGCTTGTTTTGGGGGGT	|||||||||*|||||||*||||||	TAGTAACCCAAACAAAAGCCCCCA	gi|731357336|ref|XP_010690152.1|( PREDICTED: serine/threonine-protein phosphatase 7 long form homolog [Beta vulgaris subsp. vulgaris])
	TRINITY_DN90078_c3_g1	0.5	1	24	2012	2035	ATCATTGGGCTTGTTTTGGGGGGT	|||||:||||||||||||||||||	TAGTAGCCCGAACAAAACCCCCCA	gi|731350022|ref|XP_010686293.1|( PREDICTED: cytochrome P450 CYP82D47-like [Beta vulgaris subsp. vulgaris])
Phn-m0252-3p	TRINITY_DN90621_c1_g3	0	1	23	353	375	TTGAGAATGATTCTGATCTAGTT	|||||||||||||||||||||||	AACTCTTACTAAGACTAGATCAA	gi|340842661|gb|AEK78288.1|( hypothetical chloroplast RF2, partial (plastid) [Stellaria media])
Phn-m0282-5p	TRINITY_DN91740_c0_g1	2	1	23	2860	2882	TGTCATGTAGGCTTTCTCTCCTA	||:|||:||||||:||||||*||	ACGGTATATCCGAGAGAGAGTAT	gi|902151385|gb|KNA05515.1|( hypothetical protein SOVF_189630 [Spinacia oleracea])
Phn-m0291-5p	TRINITY_DN86321_c2_g3	0.2	1	24	1368	1391	AAATAAGGGTCGAATTGTTCTATC	||||||||||||||||||||||:|	TTTATTCCCAGCTTAACAAGATGG	gi|685367422|ref|XP_009117699.1|( PREDICTED: uncharacterized protein LOC103842788 [Brassica rapa])
	TRINITY_DN87608_c1_g2	1.5	1	24	442	465	AAATAAGGGTCGAATTGTTCTATC	|||||||||||||||*:|||||||	TTTATTCCCAGCTTATTAAGATAG	gi|720039272|ref|XP_010268248.1|( PREDICTED: uncharacterized protein LOC104605260 [Nelumbo nucifera])
	TRINITY_DN90737_c2_g2	1	1	24	2299	2322	AAATAAGGGTCGAATTGTTCTATC	||*|||||||||||||||||||||	TTCATTCCCAGCTTAACAAGATAG	gi|731328534|ref|XP_010675104.1|( PREDICTED: integrator complex subunit 6 homolog [Beta vulgaris subsp. vulgaris])
	TRINITY_DN92550_c2_g1	2	1	24	1702	1725	AAATAAGGGTCGAATTGTTCTATC	|*|||||||||:|||||||||||*	TATATTCCCAGTTTAACAAGATAA	gi|902190512|gb|KNA11639.1|( hypothetical protein SOVF_133340 isoform A [Spinacia oleracea])
Phn-m0295-3p	TRINITY_DN92092_c2_g1	0	1	24	1142	1165	ATCGATGTGTCATAAGATATGAGA	||||||||||||||||||||||||	TAGCTACACAGTATTCTATACTCT	gi|731321957|ref|XP_010671628.1|( PREDICTED: probable polygalacturonase [Beta vulgaris subsp. vulgaris])

## Sheet: downregulated miRNAs
miRNAs	target gene	score	query_start	query_end	target_start	target_end	query_seq	align	target_seq	nr
miR156l-5p	TRINITY_DN86227_c0_g1	1	1	21	3802	3821	CGACAGAAGAGAGTGAGCATA	||||||||||||||:||*|||	GCTGTCTTCTCTCATTC-TAT	gi|902146131|gb|KNA05033.1|( hypothetical protein SOVF_194150 [Spinacia oleracea])
	TRINITY_DN88058_c0_g1	2	1	21	1602	1622	CGACAGAAGAGAGTGAGCATA	*|||||||||||||||:*|*|	TCTGTCTTCTCTCACTTCTCT	gi|1002276318|ref|XP_015642502.1|( PREDICTED: endoplasmin homolog [Oryza sativa Japonica Group])
	TRINITY_DN90116_c0_g1	2	1	21	707	726	CGACAGAAGAGAGTGAGCATA	*||||||||||||*|||||*|	ACTGTCTTCTCTCTCTCGT-T	gi|731329270|ref|XP_010675500.1|( PREDICTED: squamosa promoter-binding-like protein 4 [Beta vulgaris subsp. vulgaris])
	TRINITY_DN90116_c2_g6	2	1	21	930	951	CGACAGAAGAGAGTGAGC-ATA	*||||||||||||::|||*|||	ACTGTCTTCTCTCGTTCGTTAT	gi|731329270|ref|XP_010675500.1|( PREDICTED: squamosa promoter-binding-like protein 4 [Beta vulgaris subsp. vulgaris])
Phn-m0224-3p	TRINITY_DN92852_c0_g1	1.8	1	21	2051	2071	GGCCTGAATTGCAATTTAGTT	||*||||||||||||||*|:|	CCAGACTTAACGTTAAACCGA	gi|902158936|gb|KNA06277.1|( hypothetical protein SOVF_182640 [Spinacia oleracea])
